# Supplementary material for: NR-2L: A Two-Level Predictor for Identifying Nuclear Receptor Subfamilies Based on Sequence-Derived Features
Source: PubMed Central journal article supplement (PMC3156231; doi:10.1371/journal.pone.0023505), 2011-08-15
Supplement: pone.0023505.s002.pdf [file pone.0023505.s002.pdf]

**Supporting Information S2.** The independent testing dataset  $S_T$  contains 500 non-NR proteins and 568 NR proteins classified into the following 7 main subfamilies according to **NucleaRDB** (<http://www.receptors.org/NR/>): (1) NR1: thyroid hormone like; (2) NR2: HNF4-like; (3) NR3: estrogen like; (4) NR4: nerve growth factor IB-like; (5) NR5: fushi tarazu-F1 like; (6) NR6: germ cell nuclear factor like; and (7) NR0: knirps and DAX like. Both the accession numbers and sequences are given. None of the proteins included here occurs in the training dataset  $S$ .

---

## 1. 568 NR proteins $S_T^{NR}$

### (1) 231 NR1

>THA\_CHICK

MEQKPSTLDPLSEPEDTRWLDGKRKRKSSQCLVKSSMSGYIPSYLDKDEQCVVCGDKATGYHYRCITCEG  
CKGFFRRTIQKNLHPTYSCKYDGCCVIDKITRNCQQLCRFKKCI SVGMAMDLVLDSSKRVAKRKLIENR  
ERRRKEEMIKSLQHRPSPSAEWEELIHVVTEAHRSTNAQGS HWKQKRKFLPEDIGQSPMASMPDGDKVDL  
EAFSEFTKIIITPAITRVVDFAKKLP MFSELPCEDQII LLKGCCMEIMSLRAAVRYDPESETLTL SGEMAV  
KREQLKNGGLGVVSDAIFDLGKSLSAFNLDDETEVALLQAVLLMSSDR TGLICVDKIEKCEQETYLLAFEHY  
INRKHNI PHFWPKLLMKVTDLRMIGACHASRFLHMKVECPTELF PPLFLEVFEV

>THA1\_SHEEP

MEQKPSKVECGSDPEESSTRSPDGKRKRKNGQC SLKTSMSGYIPSYLDKDEQCVVCGDKATGYHYRCITC  
EGCKGFFRRTIQKNLHPTYSCKYDSCCVIDKITRNCQQLCRFKKCI AVGMAMDLVLDSSKRVAKRKLI EQ  
NRERRRKEEMIRSLQQRPEPTPEEWDLIHVATEAHRSTNAQGS HWKQRRKFLPDDIGQSP IIVSMPDGDKV  
DLEAFSEFTKIIITPAITRVVDFAKKLP MFSELPCEDQII LLKGCCMEIMSLRAAVRYDPESETLTL SGEM  
AVKREQLKNGGLGVVSDAIFELGKSLSAFNLDDETEVALLQAVLLMSTDRSGLLCVDKIEKSQEAYLLAFE  
HYVNRKHNI PHFWPKLLMKVTDLRMIGACHASRFLHMKVECPTELF PPLFLEVFEV

>THB2\_MOUSE

MNYCMPEVHEVCPAASSNCYMQVTDYLAILEDSPALSGRDVQAVPSSSIYMEQAWAVNQPYTCSYPGNLF  
KSKDSDLDMALSQSSQPAHLPEEKFPFQVQSPPHSQQKGYIPSYLDKDEL CVVCGDKATGYHYRCITCEG  
CKGFFRRTIQKSLHPSYSCKYEGKCIIDKVTRNCQCECRFKKCIYVGMATDLVLDSSKRLAKRKLIEENR  
EKRRREELQKSIGHKPEPTDEEWEELIKTVTEAHVATNAQGS HWKQKRKFLPEDIGQAPIVNAPEGGKVDL  
EAFSHFTKIIITPAITRVVDFAKKLP MFCELPCEQII LLKGCCMEIMSLRAAVRYDPDSETLTL NGEMAV  
TRGQLKNGGLGVVSDAIFDLGMSLSSFNLDDETEVALLQAVLLMSSDRPGLACVERIEKYQDSFLLAFEHY  
INRKHVTHFWPKLLMKVTDLRMIGACHASRFLHMKVECPTELF PPLFLEVFEV

>THB1\_HUMAN

MTPNSMTEGLTAWDKPKHCPDREHDWKL VGMSEACLHRKSHSERRSTLKNEQSSPHLIQTWTWSSIFHL  
DHDDVNDQSVSSAQTFQTEEKCKGYIPSYLDKDEL CVVCGDKATGYHYRCITCEGCKGFFRRTIQKNLH  
PSYSCKYEGKVIDKVTRNCQCECRFKKCIYVGMATDLVLDSSKRLAKRKLIEENREKRRREELQKSIGH  
KPEPTDEEWEELIKTVTEAHVATNAQGS HWKQKRKFLPEDIGQAPIVNAPEGGKVDLEAFSHFTKIIITPAI  
TRVVDFAKKLP MFCELPCEQII LLKGCCMEIMSLRAAVRYDPESETLTL NGEMAVTRGQLKNGGLGVV  
DAIFDLGMSLSSFNLDDETEVALLQAVLLMSSDRPGLACVERIEKYQDSFLLAFEHYINRKHVTHFWPK

LLMKVTDLRMIGACHASRFLHMKVECPTLFPPLFLEVFEED

>Q6F3J6\_CONMY

MEHMPKEQDPNLSEGEERWLDGPKRKRKNSQCSVKMSVLSLSVPGYIPSYLEKDEPCVCGDKATGYH  
 YRCITCEGCKGFFRRTIQKNLHPSYSCKYDGCCIIDKITRNQCQLCRFKKCIAVGMAMDVLDDKKRVEK  
 RRLIEENRERRRKEEMVKTLQNRPEPSGSEWELIHLVTEAHRHTNAQGSHWKQKRKFLPEDIGQSPVAPT  
 SDGDKVDLEAFSEFTKIITPAITRVVDFAKKLPMFSELPCEDQIILLKGCCMEIMSLRAAVRYDPDSETL  
 TLSGEMAVKREQLKNGGLGVVSDAIFDLGKSLAQFNLDSEVALLQAVLLMSSDRSGLTCVEKIEKQET  
 YLLAFERYINYRKHNI PHFWPKLLMKVTDLRMIGACHASRFLHMKVECPTLFPPLFLEVFEEDQDV

>THB1\_RAT

MTPNSMTENRPAWDKQKPHPDGQDWKLVGMSEACLHRKSHVERRGALKNEQTSSHLIQATWASSIFHL  
 DPDDVNDQSVSSAQTFQTEKKCKGYIPSYLDKDELVCVCGDKATGYHYRCITCEGCKGFFRRTIQKSLH  
 PSYSCKYEGKCIIDKVTRNQCQECRFKCIYVGMATDLVDDSKRLAKRKLIEENREKRRREELQKSIGH  
 KPEPTDEEWELIKTVTEAHVATNAQGSHWKQKRKFLPEDIGQAPIVNAPEGGQVDLEAFSHFTKIITPAI  
 TRVVDFAKKLPMFCELPCEQIILLKGCCMEIMSLRAAVRYDPDSETLTLNGEMAVTRGQLKNGGLGVVS  
 DAIFDLGMSLSSFNLDDETEVALLQAVLLMSSDRPGLACVERIEKYQDSFLLAFEHYINYRKHVVTHFWPK  
 LLMKVTDLRMIGACHASRFLHMKVECPTLFPPLFLEVFEED

>THAA\_XENLA

MDQNLSGLDCLSEPDEKRWPDGKRKRKNSQCMGKSGMSGDSLVSLSAGYIPSYLDKDEPCVVCSDKATG  
 YHYRCITCEGCKGFFRRTIQKNLHPSYSCKYDGCCIIDKITRNQCQLCRFKKCIAVGMAMDVLDDGKRV  
 AKRKLIEENRQRRRKEEMIKTLQQRPEPSSEWELIRIVTEAHRSTNAQGSHWKQRRKFLPEDIGQSPMA  
 SMPDGDVDLEAFSEFTKIITPAITRVVDFAKKLPMFSELTCEQIILLKGCCMEIMSLRAAVRYDPDSE  
 TLTLSGEMAVKREQLKNGGLGVVSDAIFDLGRSLAANLDDETEVALLQAVLLMSSDRGLICTDKIEKQ  
 ETYLLAFEHYINHRKHNI PHFWPKLLMKVTDLRMIGACHASRFLHMKVECPTLFPPLFLEVFEEDQEV

>THB1\_MOUSE

MTPNSMTENGLPAWDKQKPRPDGQDWKLVGMSEACLHRKSHVERRGALKNEQTSPHLIQATWTSSIFHL  
 DPDDVNDQSISSAQTFQTEKKCKGYIPSYLDKDELVCVCGDKATGYHYRCITCEGCKGFFRRTIQKSLH  
 PSYSCKYEGKCIIDKVTRNQCQECRFKCIYVGMATDLVDDSKRLAKRKLIEENREKRRREELQKSIGH  
 KPEPTDEEWELIKTVTEAHVATNAQGSHWKQKRKFLPEDIGQAPIVNAPEGGKVDLEAFSHFTKIITPAI  
 TRVVDFAKKLPMFCELPCEQIILLKGCCMEIMSLRAAVRYDPDSETLTLNGEMAVTRGQLKNGGLGVVS  
 DAIFDLGMSLSSFNLDDETEVALLQAVLLMSSDRPGLACVERIEKYQDSFLLAFEHYINYRKHVVTHFWPK  
 LLMKVTDLRMIGACHASRFLHMKVECPTLFPPLFLEVFEED

>Q7T0K4\_AMBME

MDQNPSDLDCSDPDEKRWLDGKRKRKNSQCLLNMSGYIPSYLDKDEPCVVCSDKATGYHYRCITCEG  
 CKGFFRRTIQKNLHPSYSCKYDGCCIIDKITRNQCQLCRFKKCIAVGMAMDVLDDSKRVAKRKLIEENR  
 ERRRKEEMLSMQHRPEPTSEWELIRVVTEAHRSTNAQGSHWKQKRKFLPDAIGQCPMTNVPDGDVDL  
 EAFSEFTKIITPAITRVVDFAKKLPMFSELPCEDQIILLKGCCMEIMSLRAAVRYDPDSETLTLGEMAV  
 KREQLKNGGLGVVSDAIFDLGKSLSTFNMDDETEVALLQAVLLMSSDRSGLTSIDKVEKQETTYLLAFEHY  
 INYRKHHPHFWPKLLMKVTDLRMIGACHASRFLHMKVECPTLFPPLFLEVFEEDQEV

>THAB\_XENLA

MDQNLSGLDCLSEPEDEKRWPDGKRKRKNSQCMGKSGMSGDSLVS LPPAGYIPSYLDKDEPCVVCSDKATG  
 YHYRCITCEGCKGFFRRTIQKNLHPSYSCKYDGCCIIDKITRNQCQLCRFKKCIAVGMAMDLVLDDSKRV  
 AKRKLIEENRVRRRKEEMIKTLQORPEPSSEEWELIRIVTEAHRSTNAQGS HWKQRRKFLPEDIGQSPMA  
 SMPDGDKVDLEAFSEFTKIITPAITRVVDFAKKLP MFSELTCEDQIILLKGCCMEIMSLRAAVRYDPDSE  
 TLTLSGEMAVKREQLKNGGLGVVSDAIFDLGRSLAAFNLDDTEVALLQAVLLMSSDRGTGLICTDKIEKCQ  
 ETYLLAFEHYINHRKHNI PHFWPKLLMKVTDLRMIGACHASRFLHMKVECPTELPPLFLEVFEV

>THA\_RANCA

MDQNLSGLDCLSEPEDEKRWPDGKRKRKNSQCMGKSGMSGDSSVSLLSAGYIPSYLTKDEPCVVCSDKATG  
 YHYRCITCEGCKGFFRRTIQKNLHPSYSCKYDGCCIIDKITRNQCQLCRFKKCIAVGMAMDLVLDDSKRV  
 AKRKLIEENRERRRKEEMIKTLQORPEPSSEEWELIRIVTEAHRSTNAQGS HWKQRRKFLPEDIGQNPMA  
 SMPDSDKVDLEAFSEFTKIITPAITRVVDFAKKLP MFSELPCEDQIILLKGCCMEIMSLRAAVRYDPDSE  
 TLTLSGEMAVKREQLKNGGLGVVSDAIFDLGRSLSAFNLDDEVALLQAVLLMSSDRGTGLICTDKIEKCQ  
 ETYLLAFEHYINHRKHNI PHFWPKLLMKVTDLRMIGACHASRFLHMKVECPTELPPLFLEVFEV

>THA\_SALSA

MEPISNVEDPNSSEGDEKRWPDGPKRKRKNSQSVKMSALSLSVQGYIPSYLEKDEPCVVC GDKATGYH  
 YRCITCEGCKGFFRRTIQKNLHPAYSCKYDGCCIIDKITRNQCQLCRFRKCIAVCMAMDLVLDDSKRVAK  
 RRLIEENREKRKKDEIVKTLQARPEPDSSEWELIRHVTEAHRHTNAQGS HWKQKRKFLPEDIGQSPRAPT  
 PDGDKVDLEAFSEFTKIITPAITRVVDFAKKLP MFSELPCEDQIILLKGCCMEIMSLRAAVRYDPES ETL  
 TLGEMAVKREQLKNGGLGVVSDAIFDLGKSLAQFNLDDEVALLQAVLLMSSDRSGLTLVDKIEKCQET  
 YLLAFEHYINHRKHNI PHFWPKLLMKVTDLRMIGACHASRFLHMKVECPNELFPPLFLEVFEV

>THB2\_HUMAN

MNYCMQEIYEVHPAAGSNQCYMQSTDYAYFEDSPGYSGCDAQAVPSNNIYMEQAWAVNQPYTCSYPGNMF  
 KSKDSDLDMALNQSQPEYFTEEKPTFSQVQSPSYSQKGYIPSYLDKDEL CVVCGDKATGYHYRCITCE  
 GCKGFFRRTIQKNLHPSYSCKYEGKVIDKVTNRNQCQECRFKCIYVGMATDLVLDDSKRLAKRKLIEEN  
 REKRRREELQKSIGHKPEPTDEEWELIKTVTEAHVATNAQGS HWKQKPKFLPEDIGQAPIVNAPEGGKVD  
 LEAFSHFTKIITPAITRVVDFAKKLP MFCELPCEDQIILLKGCCMEIMSLRAAVRYDPES ETLTLNGEMA  
 VTRGQLKNGGLGVVSDAIFDLGMSLSSFNLDDTEVALLQAVLLMSSDRPGLACVERIEKYQDSFLLAFEH  
 YINRKHVTHFWPKLLMKVTDLRMIGACHASRFLHMKVECPTELLPPLFLEVFEV

>Q6F3J5\_CONMY

MEHMPEEQDPNPSEGEERWLDGPKRKRKNSQCSVKMSGYIPSYLEKDEPCVVC GDKATGYHYRCITCE  
 GCKGFFRRTIQKNLHPSYSCKYDGCCIIDKITRNQCQLCRFKKCI SVGMAMDLVLDDSKRVAKRRLIEEN  
 RERRKKEEMVKTQNRPEPTNSEWELIRMVTEAHRHTNAQGS HWKQKRKFLPEDIGQSPVAPTS DGDGKVD  
 LEAFSEFTKIITPAITRVVDFAKKLP MFSELPCEDQIILLKGCCMEIMSLRAAVRYDPES ETLTLGEMA  
 VKREQLKNGGLGVVSDAIFDLGKSLAQFNLDDEVALLQAVLLTSSDRSGLTCVEKIEKCQET YLLAFEH  
 YINRKHNI PHFWPKLLMKVTDLRMIGACHASRFLHMKVECPTELPPLFLEVFEV

>THA\_HIPHI

MEPMSNKQDSNSSEGDEKGPDPVPRKRKRKNSQCSMKMSALS SVSPGYIPSYLEKDEPCVVC GDKATGYH  
 YRCITCEGCKGFFRRTIQKNLHPAYSCKYEGCCIIDKITRNQCQLCRFKKCI SVGMAMDLVLDDSKRVAK

RRLIEENREKRKREEMVRTLQVRPEPDTAEWELIRMATDAHRHTNAQGSSWKQKRKFLSDDIGQGPMVPT  
SDGDKVDLEAFSEFTKIMTPAITRVVDFAKKLPMFSELPCEDQI ILLKGCCMEIMSLRAAVRYDPESETL  
TLNGEMAVKREQLKNGGLGVVSDAIFDLGKSLAQFNLDDETEVALMQAVLLMSSDRSGLTSLEKIEQCQEA  
YLLAFEHYINRKHNI PHFWPKLLMKVTDLRMIGACHASRFLHMKVECSSELPPLFLEVFEV

>THA\_NECMA

MDQNLSDDLCLSDPDEKRWLDGKRKRKNSQCCLKNSMSGYIPSYLDKDEPCVVCSDKATGYHYRCITCEG  
CKGFFRRTIQKNLHPSYSCKYDACCIIIDKITRNCQLCRFKKCI AVGMAMDVLVDDSKRVAKRLIEENR  
ERRRKEEMLKSMQNRPEPTSEEWELIRLVTD AHCSTNAQGS HWKQKRKFLPDAIGQCPMTAVPENDRVDL  
EAFSEFTKIITPAITRVVDFAKKLPMFSELPCEDQI ILLKGCCMEIMSLRAAVRYDPESETLTLSGEMAV  
KREQLKNGGLGVVSDAIFDLGKSLSAFNLDDETEVALMQAVLLMSSDRSGLTCMDKVEKQETYLAFEHY  
INHRKHHI PHFWPKLLMKVTDLRMIGACHASRFMHMKVECPTELPPLFLEVFEV

>THA1\_BRARE

MENTEQEHNLPEDTQWPNGVKRKRKNSQCSMNSTSDKSI SVPGYVPSYLEKDEPCVVCSDKATGYHYR  
CITCEGCKGFFRRTIQKNLHPSYSCKYDSCCIIIDKITRNCQLCRFKKCI SVGMAMDVLVDDSKRVAKRR  
LIEENREKRKKEEIVKTLHNRPEPTVSEWELIRMVTEAHRHTNAQGP HWKQKRKFLPEDIGQSPAPTS DN  
DKVDLEAFSEFTKIITPAITRVVDFAKKLPMFSELPCEDQI ILLKGCCMEIMSLRAAVRYDPESETLTL  
GEMAVSREQLKNGGLGVVSDAIFDLGKSLSQFNLDDETEVALMQAVLLMSSDRSGLTCVEKIEKQEMYLL  
AFEHYINHRKHNI SHFWPKLLMKVTNLRMIGACHASRFLHMKVECPTELPPLFLEVFEVQEGSTGVAAQ  
EDGSCLR

>Q766D2\_ORYLA

MEHMPKEQDSNSNPSEGEKQWLNGPKRKRKNSQCSVKSMTGYIPSYLEKDEPCVVCSDKATGYHYRCIT  
CEGCKGFFRRTIQKSLHPSYSCKYDGCCIIIDKITRNCQLCRFKKCIDVGMAMDVLVDDSKRVAKRRLIE  
ENREKRKKEEMVKSQTRPEPTVDEWDLIRMVTEAHRHTNAQGAQWKQKRKFLPEKIGQSPVAPTS DGDK  
VDLEAFSEFTKIITPAITRVVDFAKKLPMFSELPCEDQI ILLKGCCMEIMSLRAAIRYDPESETLTL  
S GEMAVKREQLKNGGLGVVSDAIFDLGKSLAQFNLDDETEVALMQAVLLMSSDRSGLTCVDKIEKQETYL  
LAFEHYINRKHNI PHFWPKLLMKVTDLRMIGACHASRFLHMKVECPNELFPPLFLEVFEV

>Q5RZV6\_PSEAM

MEPMSNKQDSNSSEGEKQWPDVPRKRKRKNSQCSMKSMSALSSSVPGYIPSYLEKDEPCVVCSDKATGYH  
YRCITCEGCKGFFRRTIQKNLHPAYSCKYEGCCIIIDKITRNCQLCRFKKCI SVGMAMDVLVDDSKRVAK  
RRLIEENREKRKRDEMVRTLQVRPEPDTAEWELIKLATDAHRHTNAQGSSWKQKRKFLSDDIGQGPMVPT  
SDGDKVDLEAFGEFTKIMTPAITRVVDFAKKLPMFSELPCEDQI ILLKGCCMEIMSLRAAVRYDPESETL  
TLNGEMAVKREQLKNGGLGVVSDAIFDLGKSLAQFNLDDETEVALMQAVLLMSSDRSGLTSLEKIEQCQEA  
YLLAFEHYINRKHNI PHFWPKLLMKVTDLRMIGACHASRFLHMKVECPSELFPPLFLEVFEV

>THAA\_PAROL

MEPMSNKQDSNSSEGEKQWPDVPRKRKRKNSQCSMKSMSALSSSVPGYIPSYLEKDEPCVVCSDKATGYH  
YRCITCEGCKGFFRRTIQKNLHPSYSCKYEGCCIIIDKITRNCQLCRFKKCI SVGMAMDVLVDDSKRVAK  
RRLIEENREKRKREEMVRTLQIRPEPDTAEWELIRMATDAHRHTNAQGSSWKQKRKFLSDDIGQSPMVPT  
SDGDKVDLEAFSEFTKIMTPAITRVVDFAKKLPMFSELPCEDQI ILLKGCCMEIMSLRAAVRYDPDSETL  
TLNSEMAVKREQLKNGGLGVVSDAIFDLGKELGQFNLDDETEVALMQAVLLMSSDRSGHCMEKIEQCQEA

YLLAFEHYINYRKHNI PHFWPKLLMKVTDLRMIGACHASRFLHMKVECPSELPPLFLEVFEV

>THBB\_XENLA

MPSSMSVRLFTASAAQRKKIQEGDCCVVLAKTQGRFILLIGAVARVSGYIPSYLDKDELVCVCGDKATGY  
HYRCITCEGCKGFFRRTIQKNLHPSYSCKYEGKVIDKVTRNQCQECRFKCKTVGMATDLVLDDSKRLA  
KRKLIEENREKRRKDEIQKSIVQRPEPTQEEWELIQVVTEAHVATNAQGSHWKQRKFLPEDIGQAPIVN  
APEGGKVDLEAFSFTKIITPAITRVVDFAKKLPMFCELPCEQIILLKGCCMEIMSLRAAVRYDPESET  
LTLNGEMAVTRGQLKNGGLGVVSDAIFDLGVLSLSSFLDDTEVALLQAVLLMSSDRPGLSSVERIEKCQE  
GFLLAFEHYINYRKHNI AHFWPKLLMKVTDLRMIGACHASRFLHMKVECPTELPPLFLEVFEV

>THA\_HUMAN

MEQKPSKVECGSDPEENSARSPDGKRKRKNGQCCLKTSMGYIPSYLDKDEQCVVCGDKATGYHYRCITC  
EGCKGFFRRTIQKNLHPTYSCKYDSCCVIDKITRNQCQLCRFKKCIAVGMAMDLVLDDSKRVAKRKLIEQ  
NRERRRKEEMIRSLQQRPEPTPEEWDLIHATEAHRSTNAQGSHWKQRRKFLPDDIGQSPIVSMPDGDV  
DLEAFSEFTKIITPAITRVVDFAKKLPMFSELPCEDQIILLKGCCMEIMSLRAAVRYDPESDTLTSLGEM  
AVKREQLKNGGLGVVSDAIFELGKSLSAFNLDDETEVALLQAVLLMSTDRSGLLCVDKIEKSQEAYLLAFE  
HYVNRKHNI PHFWPKLLMKEREVQSSILYKAAAEGRPGGSLGVHPEGQQLGMHVVGPPVQRQLEQQ  
GEAGSLQGPVLQHQSPKSPQQRLELLHRSGILHARAVCGEDDSSEADSPSSSEEEPEVCEDLAGNAASP

>THA\_PIG

MEQKPSKVECGSDPEENSARSPDGKRKRKNGQCCLKTSMGYIPSYLDKDEQCVVCGDKATGYHYRCITC  
EGCKGFFRRTIQKNLHPTYSCKYDSCCVIDKITRNQCQLCRFKKCIAVGMAMDLVLDDSKRVAKRKLIEQ  
NRERRRKEEMIRSLQQRPEPTPEEWDLIHVATEAHRSTNAQGSHWKQRRKFLPDDIGQSPIVSMPDGDV  
DLEAFSEFTKIITPAITRVVDFAKKLPMFSELPCEDQIILLKGCCMEIMSLRAAVRYDPESDTLTSLGEM  
AVKREQLKNGGLGVVSDAIFELGKSLSAFNLDDETEVALLQAVLLMSTDRSGLLCVDKIEKSQEAYLLAFE  
HYVNRKHNI PHFWPKLLMKEREVQSSILYKAAAEGRPGGSLGVHPEGQQLGMHVVGPPVQRQLEQQ  
GEAGSLRGPVLQHQSPKSPQQRLELLHRSGILHARAVCGEDDSSEAGSLTSSDEDPEVCEDAQAATQPL  
PEAPPRADGEGGGGGG

>THA\_RAT

MEQKPSKVECGSDPEENSARSPDGKRKRKNGQCCLKSMSGYIPSYLDKDEQCVVCGDKATGYHYRCITC  
EGCKGFFRRTIQKNLHPTYSCKYDSCCVIDKITRNQCQLCRFKKCIAVGMAMDLVLDDSKRVAKRKLIEQ  
NRERRRKEEMIRSLQQRPEPTPEEWDLIHVATEAHRSTNAQGSHWKQRRKFLPDDIGQSPIVSMPDGDV  
DLEAFSEFTKIITPAITRVVDFAKKLPMFSELPCEDQIILLKGCCMEIMSLRAAVRYDPESDTLTSLGEM  
AVKREQLKNGGLGVVSDAIFELGKSLSAFNLDDETEVALLQAVLLMSTDRSGLLCVDKIEKSQEAYLLAFE  
HYVNRKHNI PHFWPKLLMKEREVQSSILYKAAAEGRPGGSLGVHPEGQQLGMHVVGPPVQRQLEQQ  
GEAGSLRGPVLQHQSPKSPQQRLELLHRSGILHRAVCGEDDSSEASSLSSSSDEDTEVFEDLAGKAA  
SP

>Q80Y90\_MOUSE

MEQKPSKVECGSDPEENSARSPDGKRKRKNGQCCLKSMSGYIPSYLDKDEQCVVCGDKATGYHYRCITC  
EGCKGFFRRTIQKNLHPTYSCKYDSCCVIDKITRNQCQLCRFKKCIAVGMAMDLVLDDSKRVAKRKLIEQ  
NRERRRKEEMIRSLQQRPEPTPEEWDLIHVATEAHRSTNAQGSHWKQRRKFLPDDIGQSPIVSMPDGDV  
DLEAFSEFTKIITPAITRVVDFAKKLPMFSELPCEDQIILLKGCCMEIMSLRAAVRYDPESDTLTSLGEM

AVKREQLKNGGLGVVSDAIFELGKSLSAFNLDDETEVALLQAVLLMSTDRSGLLCVVKIEKSQEAYLLAFE  
HYVNRKHNI PHFWPKLLMKEREVQSSILYKAAAEGRPGGSLGVHPEGQQLLGMHVQGPQVRQLEQQQL  
GEAGSLRGPVLQHQSFKSPQQRLELLHRSGILHSRAVCGEDDSSEASSLSSSSDTEDETEVCEDEQAGKAA  
SP

>THA\_MOUSE

MEQKPSKVECGSDPEENSARSPDGKRKRKNGQCPLKSSMSGYIPSYLDKDEQCVVCGDKATGYHYRCITC  
EGCKGFFRRTIQKNLHPTYSCKYDSCCVIDKITRNCQLCRFKKCIAVGMAMDLVLDSSKRVAKRKLIEQ  
NRERRRKEEMIRSLQQRPEPTPEEWDLIHVATEAHRSTNAQGSHWKQRRKFLPDDIGQSPIVSMPDGDV  
DLEAFSEFTKIITPAITRVVDFAKKLPMFSELPCEQIILLKGCCMEIMSLRAAVRYDPESETLTLTSGEM  
AVKREQLKNGGLGVVSDAIFELGKSLSAFNLDDETEVALLQAVLLMSTDRSGLLCVVKIEKSQEAYLLAFE  
HYVNRKHNI PHFWPKLLMKEREVQSSILYKAAAEGRPGGSLGVHPEGQQLLGMHVQGPQVRQLEQQF  
GEAGSLRGPVLQHQSFKSPQQRLELLHRSGILHSRAVCGEDDSSEASSLSSSSDDETEVFEDELAGKAA  
SP

>THAB\_PAROL

MAQWPEKEEEEQPMFGEEYTGYPYLYLEKDEPCVVCVCGDKATGYHYRCITCEGCKGFFRRTIQKNLHPSYS  
CKYDCCCIIDKITRNCQLCRFKKCIAVGMAMDLVLDSSKRVAKRRLIEENRERRRKEEIVKTLQNRPEP  
TGAEWELIRMVTEAHRHTNAQGAQWKQKRKFLPKIGQSPVAPTSVAPSDGDKVDLEAFSEFTKIITPAITRVV  
DFAKKLPMFSEQLPCEDQIILLKGCCMEIMSLRAAMRYDPESETLTLTSGEMAVKREQLKNGGLGVVSDAIF  
FDLGLSLAQFNLDDETEVALLQAVLLMSSDRSGLTMDKIEKCQETYLAFEHYINRKHNI PHFWPKLLM  
KVTDLRMIGACHASRFLHMKVECPNELFPPLFLEVFEDQEV

>Q800D8\_SPAAU

MSEPAEKCSPRWKDEAMQNGYIPSYLDKDELVCVCGDKATGYHYRCITCEGCKGFFRRTIQKNLNPTYAC  
KYEGKCVIDKVTRNCQECRFFKCIAVGMATDLVLDNSKRLAKRKLIEENRERRRKEELQKTVWDRLEPT  
QEEWELIRMVTEAHMATNAQGNHWKQKRKFLSAAVKTKPEEIQASMVNPPEGKVDIEAFSQFTKII  
TPAITRVVDFAKKLPMFCELPCEQIILLKGCCMEIMSLRAAVRYDPESETLTLNGEMAVTRGQLKNGGL  
GVVSDAIFDLGVSLSFNLDSEVALLQAVILLSSDRSGLSSVERIERCQEEFLLAFEHYINRKHKVAH  
FWPKLLMKVTDLRMIGACHASRFLHMKVECPNELFPPLFLEVFED

>THB\_BRARE

MSEQADKCNRSRWKDEAMQNGYIPSYLDKDELVCVCGDKATGYHYRCITCEGCKGFFRRTIQKNLNPTYAC  
KYEGKCVIDKVTRNCQECRFFKCIAVGMATDLVLDSSKRLAKRKLIEENRERRRREELQKTVWDRPEPT  
QEEWEMIRVVTEAHMATNAQGNHWKQKRKFLPEDIGSAPIVNAPEGNKVDIEAFSQFTKIITPAITRVVD  
FAKKLPMFCELPCEQIILLKGCCMEIMSLRAAVRYDPESETLTLNGEMAVTRGQLKNGGLGVVSDAIFD  
LGVSLSSFNLDSEVALLQAVILLSSDRPGLTSVERIERCQEEFLLAFEHYINRKHKVAHFWPKLLMKV  
TDLRMIGACHASRFLHMKVECPTELFPPLFLEVFED

>THB\_PAROL

MSEPAENCSPRWKDEAIQNGYIPSYLDKDELVCVCGDKATGYHYRCITCEGCKGFFRRTIQKNLNPTYAC  
KYEGKCVIDKVTRNCQECRFFKCIAVGMATDLVLDSSKRLAKRKLIEENRERRRKEELQKTVWDRLEPT  
QEEWDLIRMVTEAHMATNAQGNHWKQKRKFLSAAGVKEDKPEEIQASMANPPEGKVDIEAFSQFTKII  
TPAITRVVDFAKKLPMFCELPCEQIILLKGCCMEIMSLRAAVRYDPESETLTLNGEMAVTRGQLKNGGL

GVVSDAIFDLGVSLSFNLDDSEVALLQAVILLSSDRPGLSSVERIEPCQEEFLLAFEHYINYRKHKLAH  
FWPKLLMKVTDLRMIGACHASRFLHMKVECPTLFPPLFLEVFE

>ERBA\_AVIER

EDTRWLDGKHKRKSQCLVKSSMSGYIPSCLDKDEQCVCVCGDKATGYHYRCITCEGCKSFFRRTIQKNLH  
PTYSTYDGCVIDKI TRNQQLCRFKKCI SVGMAMDLVLDDSKRVAKRKLIEENRERRRKEEMIKSLQH  
RPSPSAEWELIHVVTEAHRSTNAQGS HWKQRRKFLEDIGQSPMASMLDGDKVDLEAFSEFTKIITPAI  
TRVVDFAKNLPMFSELPCEDQI ILLKGCCMEIMSLRAAVRYDPESETLTLGEMAVKREQLKNGGLGVVS  
DAIFDLGKSLSAFNLDDTEVALLQAVLLMSSDRGLICVDKIEKCQESYLLAFEHYINYRKHNI PHFWSK  
LLMKVADLRMIGAYHASRFLHMKVECPTLSPQEV

>Q6F3J8\_CONMY

MSEQAGKCSPRWKEHELMQHGYIPSYLDKDELVCVCSKATGYHYRCITCEGCKGFFRRTIQKNLHPTYA  
CKYEGKCAIDKVTRNQCECRFKKCI AVGMATDLVLDDSKRLAKRRLIEENRQRRRRREEVQRKVWSKPE  
PTPDEWELIRAVTEAHVATNAQGNHWKQKRKFLRAVEVKESKAEDIGQAPIINAPDGSKVDLEAFSQFTQ  
IITPAITRVVDFAKKLPMFCELPCEDQI ILLKGCCMEIMSLRAAVRYDPESETLTLNGEMAVTRGQLKNG  
GLGVVSDAIFDLGVSLSFNLDDSEVALLQAVILMSSDRPGLTSVERIEQCQEDYLLAFEHYINYRKHKV  
SYFWPKLLMKVTDLRMIGACHASRFLHMKVECPTLFPPLFLEVFE

>THB\_RANCA

MPSSMSGYIPSYLDKDELVCVCGDKATGYHYRCITCEGCKGFFRRTIQKNLHPSYSCKYEGKVIDKVTR  
NQCECRFKKCI AVGMATDLVLDDSKRLAKRRLIEENREKRKDELQKTLVQKPEPTPEEWELIQVVTEA  
HVATNAQGS HWKQKRKFLPEDIGQAPIVNAPEGKVDLEAFSQFTKIITPAITRVVDFAKKLPMFCELPC  
EDQI ILLKGCCMEIMSLRAAVRYDPESETLTLNGEMAVTRGQLKNGGLGVVSDAIFDLGVSLSFNLDDT  
EVALLQAVLLMSSDRPGLSSVERIEKCQEGFLLAFEHYINYRKHNVAHFWPKLLMKVTDLRMIGACHASR  
FLHMKVECPTLFPPLFLEVFE

>Q90Y21\_SALSA

MSEQGDKCTTPRWKHEAMQNGYIPSYLDKDELVCVCGDKATGYHYRCITCEGCKGFFRRTIQKNLNPTYA  
CKYEAKCIIDKVTRNQCECRFKKCI AVGMATDLVLDDSKRLAKRRLIEENRERRRKEELQKTVWDRPEP  
SQEEDLIRMVTEAHMSTNAQGNHWKQKRKFLPEDIGQAPVINAPEGSKVDIEAFSQFTKIITPAITRVV  
DFAKKLPMFCELPCEDQI ILLKGCCMEIMSLRAAVRYDPESETLTLNGEMAVTRGQLKNGGLGVVSDAIF  
DLGLSLSFHLDDSEVALLQTVILLSSDRPGLTSVDRIERCQEEFLLAFEHYINYRKHKVAQFWPKLLMK  
VTDLRMIGACHASRFLHMKVECPNELFPPLFLEVFE

>Q90Y22\_SALSA

MSEQGDKCTTPRWKHEAMQNGYIPSYLDKDELVCVCGDKATGYHYRCITCEGCKGFFRRTIQKNLNPTYA  
CKYEAKCIIDKVTRNQCECRFKKCI AVGMATDLVLDDSKRLAKRRLIEENRERRRKEELQKTVWDRPEP  
SQEEDLIRMVTEAHMSTNAQGNHWKQKRKFLSAVGKETKPEDIGQAPVINAPEGSKVDIEAFSQFTKI  
ITPAITRVVDFAKKLPMFCELPCEDQI ILLKGCCMEIMSLRAAVRYDPESETLTLNGEMAVTRGQLKNGG  
LGVVSDAIFDLGVSLSFHLDDSEVALLQTVILLSSDRPGLTSVDRIERCQEEFLLAFEHYINYRKHKVA  
QFWPKLLMKVTDLRMIGACHASRFLHMKVECPNELFPPLFLEVFE

>THBA\_XENLA

MPSSMSGYIPSYLDKDELVCVCGDKATGYHYRCITCEGCKGFFRRTIQKNLHPSYSCKYEGKCVIDKVTR  
 NQCQECRFKKCIAVGMATDLVLDDNKRLAKRKLIEENREKRRKDEIQKSLVQKPEPTQEEWELIQVVTEA  
 HVATNAQGSHWKQKRKFLPEDIGQAPIVNAPEGGKVDLEAFSQFTKIITPAITRVVDFAKKLPFCELP  
 EDQIILLKGCCMEIMSLRAAVRYDPESETLTLNGEMAVTRGQLKNGGLGVVSDAIFDLGVSLSFSLDDT  
 EVALLQAVLLMSSDRPGLASVERIEKQEGFLLAFEHYINRKHNI AHFWPKLLMKVTDLRMIGACHASR  
 FLHMKVECPTTELPPLFLEVFEFED

>THB\_CHICK

MSGYIPSYLDKDELVCVCGDKATGYHYRCITCEGCKGFFRRTIQKNLHPTYSCKYEGKCVIDKVTRNQCQ  
 ECRFKKCIFVGMATDLVLDDSKRLAKRKLIEENREKRRREELQKTIGHKPEPTDEEWELIKIVTEAHVAT  
 NAQGSHWKQKRKFLPEDIGQAPIVNAPEGGKVDLEAFSQFTKIITPAITRVVDFAKKLPFCELP  
 EDQIILLKGCCMEIMSLRAAVRYDPESETLTLNGEMAVTRGQLKNGGLGVVSDAIFDLGMSLSSFNLDDEVAL  
 LQAVLLMSSDRPGLVCVERIEKQEGFLLAFEHYINRKHVVAHFHPKLLMKVTDLRMIGACHASRFLHM  
 KVECPTTELPPLFLEVFEFED

>THB\_CAIMO

MSGYIPSYLDKDELVCVCGDKATGYHYRCITCEGCKGFFRRTIQKNLHPTYSCKYEGKCVIDKVTRNQCQ  
 ECRFKKCIFVGMATDLVLDDSKRLAKRKLIEENREKRRREELQKTIGHKPEPTDEEWELIKIVTEAHVAT  
 NAQGSHWKQKRKFLPEDIGQAPIVNAPEGGKVDLEAFSQFTKIITPAITRVVDFAKKLPFCELP  
 EDQIILLKGCCMEIMSLRAAVRYDPESETLTLNGEMAVTRGQLKNGGLGVVSDAIFDLGMSLSSFNLDDEVAL  
 LQAVLLMSSDRPGLVCVERIEKQEGFLLAFEHYINRKHVVAHFHPKLLMKVTDLRMIGACHASRFLHM  
 KVECPTTELPPLFLEVFEFED

>Q7T0K3\_AMBME

MPISMSGYIPSYLDKDELVCVCGDKATGYHYRCITCEGCKGFFRRTIQKNLHPTYSCKYEGKCVIDKVTR  
 NQCQECRFKCTYVGMATDLVLDDSKRLAKRKLIEENRQKRRRDELQKTLIHRPEPNLEEWELIHMVTDA  
 HMATNAQGSHWKQKRKFLPEDIGQAPIMNAPDGGKVDLEAFSQFTKIITPAITRVVDFAKKLPFSELPC  
 EDQIILLKGCCMEIMSLRAAVRYDPESKTLTLNGEMAVTRDQLKNGGLGVVSDAIFDLGMSLSSFNLDDEVAL  
 EVALLQAVLLMSSDRPGLLNVEQIEKFQEGFLLAFEHYINRKHNVVAHFHPKLLMKVTDLRMIGACHASR  
 FLHMKVECPTTELPPLFLEVFEFED

>Q6Y9T0\_NECMA

MPISMSGYIPSYLDKDELVCVCGDKATGYHYRCITCEGCKGFFRRTIQKNLHPTYSCKYEGKCVIDKVTR  
 NQCQECRFKKCTHVGMATDLVLDDGKRLAKRKLIEDNREKRRRDELQKTLIHRPEPTSEEWGLIQIVKEA  
 HMATNAEGSQWKQKRIFLPKDIGQAPIVNAPESGKVDLEAFSQFTKIITPAITRVVDFAKKLPFCELP  
 EDQIILLKGCCMEIMSLRAAVRYDPESKTLTLNGEMAVTRDQLKNGGLGVVSDAIFDLGMSLSSFNLDDEVAL  
 EVALLQAVLLMSSDRPGLLSVERIEKQEGFLLAFEHYINFRKHNVTHFWPKLLMKVTDLRMIGACHASR  
 FLHMKVECPTTELPPLFLEVFEFED

>Q766D1\_ORYLA

MSGYIPSYLDKDELVCVCGDKATGYHYRCITCEGCKGFFRRTIQKNLNPTYACKYEGKCVIDKVTRNQCQ  
 ECRFKKCIAVGMATDLVLDDGKRLAKRKLIEENRERRRKEELQKTAWDRLEPTQEEWDLIRLVTEAHTTT  
 NAQGSHWKQKRKFLSQAGGKETKPEDFGQSSVSSPDGNKVDIEAFSQFTKIITPAITRVVDFAKKLPF  
 CELPCEDQIILLKGCCMEIMSLRAAVRYDPESETLTLNGEMAVTRDQLKNGGLGVVSDAIFDLGVSLSFS



NLDDSEVALLQAVILLSSDRPGLSSTDRIERCQEEFLLA FEHYINHRKHKVAHFWPKLLMKVTDLRMIGA  
 CHASRFLHLKVECPTLFPPLFLEVFE D

>P97513\_MUSSP

MASNSSSCPTPGGGHLNGYPVPPYAFFFFPSMLGGLSPPGALTSLQHQLPVSGYSTPSPATIETQSSSSEE  
 IVPSPPSPPLPRIYKPCFVCQDKSSGYHYGVSACEGCKGFFRRSIQKNMVYTCHRDKNCI INKVTRNRC  
 QYCRLQKCFEVMGSKESVRNDRNKKKKEAPKPECSESYTLTPEVGELIEKVRKAHQETFPALCQLGKYTT  
 NNSSEQRVSLDIDLWDKFSELSTKCI IKTVEFAKQLPGFTTLTIADQITLLKAACLDILILRICTRYTPE  
 QDTMTFSDGLTLNRTQMHNAGFGPLTDLVFANQLLPLEMDDAETGLLSAICLICGDRQDLEQPKVDM  
 LQEPLLEALKVYVRKRRPSRPHMFPKMLMKITDLRSISAKGAERVITLKMEIPGSMPLIQEMLENSEGL  
 DTLSGQSGGGTRDGGGLAPPPGSCSPSLSPSSHRSSPATQSP

>RRA\_MOUSE

MASNSSSCPTPGGGHLNGYPVPPYAFFFFPMLGGLSPPGALTSLQHQLPVSGYSTPSPATIETQSSSSEE  
 IVPSPPSPPLPRIYKPCFVCQDKSSGYHYGVSACEGCKGFFRRSIQKNMVYTCHRDKNCI INKVTRNRC  
 QYCRLQKCFDVMGSKESVRNDRNKKKKEAPKPECSESYTLTPEVGELIEKVRKAHQETFPALCQLGKYTT  
 NNSSEQRVSLDIDLWDKFSELSTKCI IKTVEFAKQLPGFTTLTIADQITLLKAACLDILILRICTRYTPE  
 QDTMTFSDGLTLNRTQMHNAGFGPLTDLVFANQLLPLEMDDAETGLLSAICLICGDRQDLEQPKVDM  
 LQEPLLEALKVYVRKRRPSRPHMFPKMLMKITDLRSISAKGAERVITLKMEIPGSMPLIQEMLENSEGL  
 DTLSGQSGGGTRDGGGLAPPPGSCSPSLSPSSHRSSPATQSP

>Q6F3J7\_CONMY

MSGYIPSYLDKDELVCVCGDRATGYHYRCITCEGCKGFFRRTIQKNLNPTYACKYEAKCVIDKVTRNQCC  
 ECRFRKCIAGMATDLVLDDSKRLAKRRLIEENRERRRREELQRSVWEKPEPSPQEWDLIHLVTEAHMAT  
 NAQGNHWKQKRKFLRDVCVPECKPEDLGHPPILSAPEGNKVDIEAFSQFTKIITPAITRVVDFAKKLPMF  
 CELPCEDQIVLLKGCCMEIMSLRAAVRYDPESETLTLNGEMAVTRGQLKNGGLGVVSDAIFDLGVLSLAF  
 NLDDSEVALLQAVILLSSDRPGLSSVERIERCQEEFILAFEHYINRKHKVAHFWPKLLMKVTDLRMIGA  
 CHASRFLHMKVECPTLFPPLFLEVFE D

>RRA\_HUMAN

MASNSSSCPTPGGGHLNGYPVPPYAFFFFPMLGGLSPPGALTTLQHQLPVSGYSTPSPATIETQSSSSEE  
 IVPSPPSPPLPRIYKPCFVCQDKSSGYHYGVSACEGCKGFFRRSIQKNMVYTCHRDKNCI INKVTRNRC  
 QYCRLQKCFEVMGSKESVRNDRNKKKKEVPKPECSESYTLTPEVGELIEKVRKAHQETFPALCQLGKYTT  
 NNSSEQRVSLDIDLWDKFSELSTKCI IKTVEFAKQLPGFTTLTIADQITLLKAACLDILILRICTRYTPE  
 QDTMTFSDGLTLNRTQMHNAGFGPLTDLVFANQLLPLEMDDAETGLLSAICLICGDRQDLEQPKVDM  
 LQEPLLEALKVYVRKRRPSRPHMFPKMLMKITDLRSISAKGAERVITLKMEIPGSMPLIQEMLENSEGL  
 DTLSGQPGGGTRDGGGLAPPPGSCSPSLSPSSNRSSPATHSP

>RRA\_CHICK

MASNSSSCPTPGGGHLNGYPVTPYAFFFFPHMLGGLSPPSSLPGIQHQLPVSGYSTPSPATVETQSTSSEE  
 IVPSPPSPPLPRIYKPCFVCQDKSSGYHYGVSACEGCKGFFRRSIQKNMVYTCHRDKNCI INKVTRNRC  
 QYCRLQKCFEVMGSKESVRNDRNKKKDVPKTECSESYIVTPEVEELIEKVRKAHQETFPALCQLGKYTT  
 NNSSEQRVSLDIDLWDKFSELSTKCI IKTVEFAKQLPGFTTLTIADQITLLKAACLDILILRICTRYTPE  
 QDTMTFSDGLTLNRTQMHNAGFGPLTDLVFANQLLPLEMDDAETGLLSAICLICGDRQDLEQPKVDK

LQEPLLEALKIYVRKRRPNKPHMFPKMLMKITDLRSISAKGAERVITLKMEIPGSMPLIQEMLENSEGM  
DTLGGQPGGPRGTGGLGPPPGSCSPSLSPSSTRSSPATHSP

>RRG1\_HUMAN

MATNKERLFAAGALGPGSGYPGAGFPFAFPGALRGSPPFEMLSPSFRGLGQPDLPKEMASLSVETQSTSS  
EEMVPSSPSPPPPPRVYKPCFVCNDKSSGYHYGVSSCEGCKGFFRRSIQKNMVYTCRDKNCIINKVTRN  
RCQYCRQLQKCFEVGMSKEAVRNRNKKKKEVKEEGSPDSYELSPQLEELITKVSKAHQETFPSLCQLGKY  
TTNSSADHRVQLDLGLWDKFSELATKCI IKIVEFAKRLPGFTGLSIADQITLLKAACLDI LMLRICTRYT  
PEQDTMTFSDGLTLNRTQMHNAGFGPLTDLVFAFAGQLLPLEMDDTETGLLSAICLICGDRMDLEEPEKV  
DKLQEPLLEALRLYARRRRPSQPYMFPRMLMKITDLRGI STKGAERAITLKMEIPGMPPLIREMLENPE  
MFEDDSSQPGPHPNASSEDEVPGGQKGGLKSPA

>Q91YX2\_MOUSE

MATNKERLFAAGALGPGSGYPGAGFPFAFPGALRGSPPFEMLSPSFRGLGQPDLPKEMASLSVETQSTSS  
EEMVPSSPSPPPPPRVYKPCFVCNDKSSGYHYGVSSCEGCKGFFRRSIQKNMVYTCRDKNCIINKVTRN  
RCQYCRQLQKCFEVGMSKEAVRNRNKKKKEVKEEGLPDSYELSPQLEELITKVSKAHQETFPSLCQLGKY  
TTNSSADHRVQLDLGLWDKFSELATKCI IKIVEFAKRLPGFTGLSIADQITLLKAACLDI LMLRICTRYT  
PEQDTMTFSDGLTLNRTQMHNAGFGPLTDLVFAFAGQLLPLEMDDTETGLLSAICLICGDRMDLEEPEKV  
DKLQEPLLEALRLYARRRRPSQPYMFPRMLMKITDLRGI STKGAERAITLKMEIPGMPPLIREMLENPE  
MFEDDSSKPGPHPKASSEDEAPGGQKRGQSPQPDQGP

>RRG1\_MOUSE

MATNKERLFAAGALGPGSGYPGAGFPFAFPGALRGSPPFEMLSPSFRGLGQPDLPKEMASLSVETQSTSS  
EEMVPSSPSPPPPPRVYKPCFVCNDKSSGYHYGVSSCEGCKGFFRRSIQKNMVYTCRDKNCIINKVTRN  
RCQYCRQLQKCFEVGMSKEAVRNRNKKKKEVKEEGSPDSYELSPQLEELITKVSKAHQETFPSLCQLGKY  
TTNSSADHRVQLDLGLWDKFSELATKCI IKIVEFAKRLPGFTGLSIADQITLLKAACLDI LMLRICTRYT  
PEQDTMTFSDGLTLNRTQMHNAGFGPLTDLVFAFAGQLLPLEMDDTETGLLSAICLICGDRMDLEEPEKV  
DKLQEPLLEALRLYARRRDPKPYMFPRMLMKITDLRGI STKGAERAITLKMEIPGMPPLIREMLENPE  
MFEDDSSKPGPHPKASSEDEAPGGQKRGQSPQPDQGP

>Q9I8T3\_AMBME

MYDCMEAFMLAPHPLYDVTNPGACMLRKRKARLSPCFGGLDPFGWPQPASLQSVETQSTSSEEMVPSSPSP  
PPPRVYKPCFVCNDKSSGYHYGVSSCEGCKGFFRRSIQKNMVYTCRDKNCIINKVTRNRQCQYCRQLQKCF  
EVGMSKEAVRNRNKKKKEIKEEVVTDSEMPPEMEALIAKVSKAHQETFPSLCQLGKYTTNSSADHRVQ  
LDLGLWDKFSELATKCI IKIVEFAKRLPGFATLT IADQITLLKAACLDI LMLRICTRYTPEQDTMTFSDG  
LTLNRTQMHNAGFGPLTDLVFAFAEQLLPLEMDDTETGLLSAICLICGDRMDLEEPEKVDKLQEPLLEAL  
KIYARRRRPNKPYMFPRMLMKITDLRGI STKGAERAITLKMEIPGMPPLIREMLENPEAFEDDALSSPK  
AEEKPIKVEEIPAEPSSKEL

>RRB\_HUMAN

MTTSGHACPVPAVNGHMTHYPATPYPLLFPVIGGLSLPPLHGLHGHPPPSGCSTPSPATIIETQSTSSEE  
LVSPSPSPLPPPRVYKPCFVCQDKSSGYHYGVSSCEGCKGFFRRSIQKNMIYTCRDKNCVINKVTRNRC  
QYCRQLQKCFEVGMSKESVRNRNKKKKEVKEEYEMTAELDDLTEKIRKAHQETFPSLCQLGKYTT  
NSSADHRVRLDLGLWDKFSELATKCI IKIVEFAKRLPGFTGLTIADQITLLKAACLDI LMLRICTRYTPE

QDTMTFSDGLTLNRTQMHNAGFGPLTDLVFTFANQLLPLEMDDTETGLLSAICLICGDRQDLEEPKVDK  
 LQEPLLEALKIYIRKRRPSKPHMFPKILMKITDLRSISAKGAERVITLKMEIPGSMPLIQEMLENSEGH  
 EPLTPSSSGNTAEHSPSISPSSVENSQSVQSPVQ

>RRB\_CHICK

MTTSSRTCVPVAVNGHMTHYPAAPYPLLFPVIGGLSLPSLHGLQSHPPTSGCSTPSPATVETQSTSSEE  
 LVPSPSPPLPPRVYKPCFVCQDKSSGYHYGVSACEGCKGFFRRSIQKNMVYTCNRDKNVINKVTRNRC  
 QYCRLQKCFEVMGSKESVRNDRNKKKKEPTKQESTENYEMTAELDDLTEKIRKAHQETFPPLCQLGKYTT  
 NSSADHRVRLDLGLWDFSELATKCI IKIVEFAKRLPGFTSLTIADQITLLKAACLDILILIRICTRYTPE  
 QDTMTFSDGLTLNRTQMHNAGFGPLTDLVFTFANQLLPLEMDDTETGLLSAICLICGDRQDLEEPKVDK  
 LQEPLLEALKIYIRKRRPNKPHMFPKILMKITDLRSISAKGAERVITLKMEIPGSMPLIQEMLENSEGH  
 EPLTPTSGNTAEHSPSISPSSVDNSSVSQSPMVQ

>RRG2\_HUMAN

MYDCMETFAPGPRRLYGAAGPGAGLLRRATGGSCFAGLESFAWPQPASLQSVETQSTSSEEMVPSPPSP  
 PPRVYKPCFVCNDKSSGYHYGVSSCEGCKGFFRRSIQKNMVYTCNRDKNVINKVTRNRCQYCRLQKCF  
 EVGMSKEAVRNRNKKKKEVKEEGSPDSYELSPQLEELITKVSKAHQETFPPLCQLGKYTTNSSADHRVQ  
 LDLGLWDFSELATKCI IKIVEFAKRLPGFTGLSIADQITLLKAACLDILMLIRICTRYTPEQDTMTFSDG  
 LTLNRTQMHNAGFGPLTDLVFAFAGQLLPLEMDDTETGLLSAICLICGDRMDLEEPEKVDKIQEPLLEAL  
 RLYARRRRPSQPYMFPRLMKITDLRGI STKGAERAITLKMEIPGMPPLIREMLENPEMFEDSSQPGP  
 HPNASSEDEVGGQGKGLKSPA

>RRB\_COTJA

MTTSSRTCVPVAVNGHMTHYPAAPYPLLFPVIGGLSLPSLHGLQSHPPTSGCSTPSPASVETQSTSSEE  
 LVPSPSPPLPPRVYKPCFVCQDKSSGYHYGVSACEGCKGFFRRSIQKNMVYTCNRDKNVINKVTRNRC  
 QYCRLQKCFEVMGSKESVRNDRNKKKKEPTKQESTENYEMTAELDDLTEKIRKAHQETFPPLCQLGKYTT  
 NSSADHRVRLDLGLWDFSELATKCI IKIVEFAKRLPGFTSLTIADQITLLKAACLDILILIRICTRYTPE  
 QDTMTFSDGLTLNRTQMHNAGFGPLTDLVFTFANQLLPLEMDDTETGLLSAICLICGDRQDLEEPKVDK  
 LQEPLLEALKIYIRKRRPNKPHMFPKILMKITDLRSISAKGAERVITLKMEIPGSMPLIQEMLENSEGH  
 EPLTPTSGNTAEHSPSISPSSVDNSSVSQSPMVQ

>RRA\_NOTVI

MASNGGSCPSSGGHMNGYPVPHYAFFPHMLGGLSPPGSLAGIPHPLVSAYSTPSPATIETQSTSSEEI  
 VPSPPSPPLPRIYKPCFVCQDKSSGYHYGVSACEGCKGFFRRSIQKNMVYTCNRDKNVINKVTRNRCQ  
 YCRLQKCFEVMGSKESVRNDRNKKKQEAPKQECTESYIITPEVEDLVEKVRKAHQETFPALCQLGKYTT  
 NNSSEERVSLDIDLWDFSELSTKCI IKTVEFAKQLPGFTTLTIADQITLLKAACLDILILIRICTRYTPD  
 QDTMTFSDGLTLNRTQMHNAGFGPLTDLVFAFANQLLPLEMDDAETGLLSAICLICGDRQDLEQPKVDK  
 LQEPLLEALKIYVRKRRPNKPHMFPKMLMKITDLRSISAKGAERVITLKMEIPGSMPLIQEMLENSEGL  
 DSLTGQPPRASSLAPPPGSCSPSLSPSSNRSSPTSHSP

>Q8VHB6\_MESAU

MYDCMESFAPGPRRLYGAAGPGAGLLRRATGSSCFAGLESFAWAQPASLQSVETQSTSSEEMVPSPPSP  
 PPRVYKPCFVCNDKSSGYHYGVSSCEGCKGFFRRSIQKNMVYTCNRDKNVINKVTRNRCQYCRLQKCF  
 EVGMSKEAVRNRNKKKKEVKEECSPDSYELSPQLEELITKVSKAHQETFPPLCQLGKYTTNSSADHRVQ

LDLGLWDFSELATKCI IKIVEFAKRLPGFTGLSIADQITLLKAACLDILMLRICTRYTPEQDTMTFSDG  
 LTLNRTQMHNAGFGPLTDLVFAFAGQLLPLEMDDTETGLLSAICLICGDRMDLEEPEKVDKIQEPLLEAL  
 RLYARRRRPSQPYMFPRLMKITDLRGI STKGAERAITLKMEIPGMPPLIREMLENPEMFEDDSSKSGP  
 HPKASSEDETPGGQGKVGKLPPT

>Q5U645\_HUMAN

MFDCMDVLSVSPGQILDIFYTASPSSCMLQEKALKACFSGLTQTEWQHRHTAQSIETQSTSSEELVPSPPS  
 PLPPRVYKPCFVCQDKSSGYHYGVSACEGCKGFFRRSIQKNMIYTCHRDKNVCINKVTRNRCQYCRLQK  
 CFEVGMSSKESVRNDRNKKKKKETSQECTESYEMTAELDDLTEKIRKAHQETFPPLCQLGKYTTNSSADHR  
 VRLDLGLWDFSELATKCI IKIVEFAKRLPGFTGLTIADQITLLKAACLDILILRICTRYTPEQDTMTFS  
 DGLTLNRTQMHNAGFGPLTDLVFTFANQLLPLEMDDTETGLLSAICLICGDRQDLEEPKVDKIQEPLLE  
 ALKIYIRKRRPSKPHMFPKILMKITDLRSISAKGAERVI TLKMEIPGSMPLIQEMLENSEGHEPLTPSS  
 SGN TAEHSPSISPSVKT VGSVSHSCNKT FSSYFKHSVPVSGFKMQEKTFLLLLSFWTEKILKLLKDD  
 QEVFICINIYTPHCVTYLEIQTFPILKNQPFHATR N

>RRG2\_MOUSE

MYDCMESFVPGPRRLYGAAGPGAGLLRRATGSSCFAGLESFAWAQPASLQSVETQSTSSEEMVPSPPSPP  
 PPPRVYKPCFVCNDKSSGYHYGVSSCEGCKGFFRRSIQKNMVY TCHRDKNCI INKVTRNRCQYCRLQKCF  
 EVGMSKEAVRNDRNKKKKEVKEEGSPDSYELSPQLEELITKVSKAHQETFPPLCQLGKYTTNSSADHRVQ  
 LDLGLWDFSELATKCI IKIVEFAKRLPGFTGLSIADQITLLKAACLDILMLRICTRYTPEQDTMTFSDG  
 LTLNRTQMHNAGFGPLTDLVFAFAGQLLPLEMDDTETGLLSAICLICGDRMDLEEPEKVDKIQEPLLEAL  
 RLYARRRDPKPYMFPRLMKITDLRGI STKGAERAITLKMEIPGMPPLIREMLENPEMFEDDSSKPGP  
 HPKASSEDEAPGGQGKRGQSPQPDQGP

>Q9I8T2\_AMBME

MYDCMEAFMLAPHPLYDVTNPGACMLRKARLSPCFGGLDPFGWQPASLQSVETQSTSSEEMVPSPPSPP  
 PPPRVYKPCFVCNDKSSGYHYGVSSCEGCKGFFRRSIQKNMVY TCHRDKNCI INKVTRNRCQYCRLQKCF  
 EVGMSKEVVA AAAVRNDRNKKKKEIKEEVVTD SYEMPEMEALIAKVSKAHQETFPPLCQLGKYTTNSSA  
 DHRVQLDLGLWDFSELATKCI IKIVEFAKRLPGFATLT IADQITLLKAACLDILMLRICTRYTPEQDTM  
 TFS DGLTLNRTQMHNAGFGPLTDLVFAFAEQLLPLEMDDTETGLLSAICLICGDRMDLEEPEKVDKIQEP  
 LLEALKIYARRRRPNKPYMFPRLMKITDLRGI STKGAERAITLKMEIPGMPPLIREMLENPEAFEDDA  
 LSSPKAEKPIKVEEIPA EKPSKEL

>Q9QWJ1\_RAT

MYESVEVGGLTPAPNPFLVVDVFNQNRACLLEKGLPAPGPYSTPLRTP LWNGSNHSIETQSSSSEEIVP  
 SPPSPPLPRIYKPCFVCQDKSSGYHYGVSACEGCKGFFRRSIQKNMVY TCHRDKNCI INKVTRNRCQYC  
 RLQKCFEVGMSKESVRNDRNKKKKETPKPECSesyTLTPEVGELIEKVRKANQETFPALCQLGKYTTNNS  
 SEQRVSLDIDLWDFSELSTKCI IKTVEFAKQLPGFTTLTIADQITLLKAACLDILILRICTRYTPEQDT  
 MTFSDGLTLNRTQMHNAGFGPLTDLVFAFANQLLPLEMDDAETGLLSAICLICGDRQDLEQPKVDMLQE  
 PLLEALKVYVRKRRPSQPHMFPKMLMKITDLRSISAKGAERVI TLKMEIPGSMPLIQEMLENSEGLDTL  
 SGQSGGGTRDGGGLAPPPGSCSPSLSPSSHRSSPATQSP

>Q8VHB8\_MESAU

MPSLRAPQAMPPSCLAGALLRGPSPATIETQSSSSEEIVPSPPSPPLPRIYKPCFVCQDKSSGYHYGV

SACEGCKGFFRRSIQKNMVYTCNRDKNCI INKVTRNRCQYCRLOKCFEVGMSKESVRNDRNKKKKEAAKP  
 ECSESYTLTPEVGELIEKVRKAHQETFPALCQLGKYTTNNSSEQRVSLDIDLWDFSELSTKCI IKTVEF  
 AKQLPGFTTLTIADQITLLKAAACLDILILIRICTRYTPEQDTMTFSDGLTLNRTQMHNAGFGPLTDLVFAF  
 ANQLLPLEMDDAETGLLSAICLICGDRQDLEQDPKVDMLQEPLLEALKVYVRKRRPSRPHMFPKMLMKIT  
 DLRSISAKGAERVITLKMEIPGSMPLIQEMLENSEGLDTLGSGQSGGGTRDGGGLAPPGSCSPSLSPSS  
 HRSSPATQSP

>Q8VHB7\_MESAU

MFD CMDVLSVSPGQI LDFYTASPSSCMLQE KALKACLSGFTQA EWQHRHTAQSIETQSTSSEELVPSPPS  
 PLPPRVYKPCFVCQDKSSGYHYGVSACEGCKGFFRRSIQKNMIYTCHRDKNCVINKVTRNRCQYCRLOK  
 CFEVGMSKESVRNDRNKKKKEPSKQECTESYEMTAELDDLTEKIRKAHQETFPSLCQLAKYTTNSSADHR  
 VRLDLGLWDFSELATKCI IKIVEFAKRLPGFTSLTIADQITLLKAAACLDILILIRICTRYTPEQDTMTFS  
 DGLTLNRTQMHNAGFGPLTDLVFTFANQLLPLEMDDTETGLLSAICLICGDRQDLEEPTKVVDKLEPLLE  
 ALKIYIRKRRPSKPHMFPKILMKITDLRSISAKGAERVITLKMEIPGSMPLIQEMLENSEGHEPLTPSS  
 SGN TAEHSPSVSPSSVENSGVVSQSPLLQ

>RRG\_XENLA

MANSSKERLCGAGAPLGHANGFPPSVYPFAFSGGIRRSPPFEVLANGGFFRSFPTDLPKEMASLSLTMGA  
 AERSAHSDCISTVETQSTSSEEMVPSSPSPPPPRVYKPCFVCNDKSSGYHYGVSSCEGCKGFFRRSIQK  
 NMVYTCNRDKNQINKVTRNRCQFCRLQKCFQVGMSKEAVRNDRNKKKKEIKEEVLPDSYEMPPEMEEL  
 IQVSKAHQETFPSLCQLGKYTTNSSADQVRQLDLGLWDFSELSTKCI IKIVEFAKRLPGFTTLTIADQ  
 ITLLKSACLDILMLRICTRYTPEQDTMTFSDGLTLNRTQMHNAGFGPLTDLVFSFADQLLPLEMDDTETG  
 LLSAICLICGDRMDLEEPEKVEKLEPLLEALKFYARRRRDPKPYMFPRLMKITDLRGISTKGAERAIT  
 LKLEIPGMPPLIREMLENPEAFEDGAATPKPSERSSESSESSNGSPTGEDSSGSKTP

>PPAT\_PIG

MGETLGD SLIDPESDAFD TLSANISQEV TMVDTEMPFWPTNFGISSVDLSVMDDHSHSFDIKPFTTVDFS  
 SISTPHYEDI PFPRADPMVADYKYDLKLQDYQSAIKVEPVSPYYSEKTQLYNKPHEEPSNSLMAIECRV  
 CGDKASGFHYGVHACEGCKGFFRRTIRLKL IYDRCDLNCR IHKKS RNKCQYCRFQKCLAVGMSHNAIRFG  
 RMPQAEKEKLLAEISSDIDQLNPESADLRALAKHLYDSYIKSFPLTKAKARAILTGKTTDKSPFVIYDMN  
 SLMMGEDKIKFKHITPLQEQSKEVAIRIFQGCQFRSVEAVQEITEYAKNIPGFVNLDLNDQVTLKYG VGH  
 EIIYTMLASLMNKDGVLI SEGQGFMTREFL KSLRKPF GDFMEPKFEFAVKFNALELDDSLAIFIAV IIL  
 SGDRPGLLNKPIEDIQDNL LQALELQLKLNHP ESSQLFAKLLQKMTDLRQIVTEHVQLLQVIKKTETDM  
 SLHPLLQEIYKDLY

>Q8HZ56\_SHEEP

MVDTEMPFWPTNFGISSVDLSMDDHSHAFDIK PFTTVDFSSISAPHYEDI PFPRADPMVADYKYDLKLQ  
 EYQSAIKVEPVSPYYSEKTQLYSKPHEEPSNSLMAIECRVCGDKASGFHYGVHACEGCKGFFRRTIRL  
 LIYDRCDLNCR IHKKS RNKCQYCRFQKCLAVGMSHNAIRFG RMPQAEKEKLLAEISSDIDQLNPESADLR  
 ALAKHLYDSYIKSFPLTKAKARAILTGKTTDKSPFVIYDMNSLMMGEDKIKFKHISPLQEPSKEVAIRIF  
 QGCQFRSVEAVQEITEYAKNIPGFVNLDLNDQVTLKYG VHEI IYTMLASLMNKDGVLI SEGQGFMTREF  
 LKSLRKPF GDFMEPKFEFAVKFNALELDDSLAIFIAV IILSGDRPGLLNKPIEDIQDNL LQALELQLK  
 LNHP ESSQLFAKLLQKMTDLRQIVTEHVQLLQVIKKTETDMSLHPLLQEIYKDLY

>PPAT\_BOVIN

MGETLGDALIDPESEPFVAVTVSARTSQEITMVDTEMPFWPTNFGISSVDLSMDDHSHAFDIKPFTTVDF  
 SSISTPHYEDI PFPRADPMVADYKYDLKLQEYQSAIKVEPVSPYYSEKTQLYSKPHEEPSNSLMAIECR  
 VCGDKASGFHYGVHACEGCKGFFRRTIRLKLIIYDRCDLNCRIHKKSRNKCQYCRFQKCLAVGMSHNAIRF  
 GRMPQAEKEKLLAEISSDIDQLNPESADLRALAKHLYDSYIKSFPLTKAKARAILTGKTTDKSPFVIYDM  
 NSLMMGEDKIKFKHISPLQEFSKEVAIRIFQGCQFRSVEAVQEITEYAKNIPGFVNLDLNDQVTLKYG  
 HEI IYTMLASLMNKDGVLI SEGQGFMTREFLKSRLKPFQDFMEPKFEFAVKFNALELDDSDLAIFIAV I I  
 LSGDRPGLLNPKPIEDIQDNLLQALELQLKLNHPESQLFAKLLQKMTDLRQIVTEHVQLLQVIKKTETD  
 MSLHPLLQEIYKDLY

>PPAT\_MACMU

MGETLGDSPIDPESDSFTDTLSANISQEITMVDTEMPFWPTNFGISSVDLSVMDHSHSFDIKPFTTVDF  
 SSISAPHYEDI PFTRTDPMVADYKYDLKLQEYQSAIKVEPASPPYYSEKTQLYNKPHEEPSNSLMAIECR  
 VCGDKASGFHYGVHACEGCKGFFRRTIRLKLIIYDRCDLNCRIHKKSRNKCQYCRFQKCLAVGMSHNAIRF  
 GRMPQAEKEKLLAEISSDIDQLNPESADLRALAKHLYDSYIKSFPLTKAKARAILTGKTTDKSPFVIYDM  
 NSLMMGEDKIKFKHITPLQEFSKEVAIRIFQGCQFRSVEAVQEITEYAKSIPGFVNLDLNDQVTLKYG  
 HEI IYTMLASLMNKDGVLI SEGQGFMTREFLKSRLKPFQDFMEPKFEFAVKFNALELDDSDLAIFIAV I I  
 LSGDRPGLLNPKPIEDIQDNLLQALELQLKLNHPESQLFAKLLQKMTDLRQIVTEHVQLLQVIKKTETD  
 MSLHPLLQEIYKDLY

>RRA\_FUGRU

MAGKGNPVPGPLHNGFVPTYSYFFPHMLGSLSPALPLGLPISGYSTPSPATIETQSTSSEEIVSPSPSP  
 PPPPRVYKPCFVCQDKSSGYHYGVSACEGCKGFFRRSIQKNMVYTCHEKNCIINKVTRNRCQYCRQLQKC  
 LEVGMSKESVRNDRNKKKDEKKPECIENYVLSPDTEQMINRVRKAHQETFPPLCQLGKYTTTNSERRV  
 ALDVDLWDFSELSTKCI IKTFEFAKQLPGFVTLTIADQITLLKAACLDILILRICTRYTPEQDTMTFSD  
 GLTLNRTQMHNAGFGPLTDLVFAFANQLLPLEMDDAETGLLSAICLLCGDRQDLEQAQKVDILQEPLLEA  
 LKIYVRRRRPHKPHMFPKMLMKITDLRSISAKGAERVITLKMEIPGSMPLIQEMLENGLESGATGSR  
 PSGAPPGSCSPSLSPSSAQSSPPTQSP

>Q95J17\_MACFA

MVDTEMPFWPTNFGISSVDLSVMDHSHSFDIKPFTTVDFSSISAPHYEDI PFTRTDPMVADYKYDLKLQ  
 EYQSAIKVEPASPPYYSEKTQLYNKPHEEPSNSLMAIECRVCGDKASGFHYGVHACEGCKGFFRRTIRL  
 LIYDRCDLNCRIHKKSRNKCQYCRFQKCLAVGMSHNAIRFGRMPQAEKEKLLAEISSDIDQLNPESADLR  
 ALAKHLYDSYIKSFPLTKAKARAILTGKTTDKSPFVIYDMNSLMMGEDKIKFKHITPLQEFSKEVAIRIF  
 QGCQFRSVEAVQEITEYAKSIPGFVNLDLNDQVTLKYGVEHEI IYTMLASLMNKDGVFI SEGQGFMTREF  
 LKSLRKPFGDFMEPKFEFAVKFNALELDDSDLAIFIAV I I LSGDRPGLLNPKPIEDIQDNLLQALELQLK  
 LNHPESQLFAKLLQKMTDLRQIVTEHVQLLQVIKKTETDMSLHPLLQEIYKDLY

>Q8MHZ0\_MACFA

MKGFSEITMVDTEMPFWPTNFGISSVDLSVMDHSHSFDIKPFTTVDFSSISAPHYEDI PFTRTDPMVAD  
 KYDLKLQEYQSAIKVEPASPPYYSEKTQLYNKPHEEPSNSLMAIECRVCGDKASGFHYGVHACEGCKGF  
 FRRTIRLKLIIYDRCDLNCRIHKKSRNKCQYCRFQKCLAVGMSHNAIRFGRMPQAEKEKLLAEISSDIDQL  
 NPESADLRALAKHLYDSYIKSFPLTKAKARAILTGKTTDKSPFVIYDMNSLMMGEDKIKFKHITPLQEFS  
 KEVAIRIFQGCQFRSVEAVQEITEYAKSIPGFVNLDLNDQVTLKYGVEHEI IYTMLASLMNKDGVFI SEG

QGFMTREFLKSRLKPFDFMEPKFEFAVKFNALELDDSDLAIFIAVILSGDRPGLLNKPIEDIQDNLL  
QALELQLKLNHPESQLFAKLLQKMTDLRQIVTEHVQLLQVIKKTETDMSLHPLLQEIKYDLY

>Q95KZ8\_MACFA

MGETLGDSPIDPESDSFTDTLSANISQEITMVDTEMPFWPTNFGISSVDLSVMDDHSHSFDIKPFTTVDF  
SSISAPHYEDIPFTRTDPMVADYKYDLKQEQSAIKVEPASPPYYSEKTQLYNKPHEEPSNSLMAIECR  
VCGDKASGFHYGVHACEGCKGFFRRTIRLKLIIYDRCDLNCRIHKKSRNKCYCRFQKCLAVGMSHNAIRF  
GRMPQAEKEKLLAEISSDIDQLNPESADLRALAKHLYDSYIKSFPLTKAKARAILTGKTTDKSPFVIYDM  
NSLMMGEDKIKFKHITPLQEQSKEVAIRIFQGCQFRSVEAVQEITEYAKSIPGFVNLDLNDQVTLKYG  
HEIIYTMLASLMNKDGVLISEGQGFMTREFLKSRLKPFDFMEPKFEFAVKFNALELDDSDLAIFIAVIL  
LSGDRPGLLNKPIEDIQDNLLQALELQLKLNHPESQLFAKLLQKMTDLRQIVTEHVQLLQVIKKTETD  
MSLHPLLQEIKYDLY

>PPAT\_HUMAN

MGETLGDSPIDPESDSFTDTLSANISQEMTMVDTEMPFWPTNFGISSVDLSVMEDHSHSFDIKPFTTVDF  
SSISTPHYEDIPFTRTDPVVADYKYDLKQEQSAIKVEPASPPYYSEKTQLYNKPHEEPSNSLMAIECR  
VCGDKASGFHYGVHACEGCKGFFRRTIRLKLIIYDRCDLNCRIHKKSRNKCYCRFQKCLAVGMSHNAIRF  
GRMPQAEKEKLLAEISSDIDQLNPESADLRALAKHLYDSYIKSFPLTKAKARAILTGKTTDKSPFVIYDM  
NSLMMGEDKIKFKHITPLQEQSKEVAIRIFQGCQFRSVEAVQEITEYAKSIPGFVNLDLNDQVTLKYG  
HEIIYTMLASLMNKDGVLISEGQGFMTREFLKSRLKPFDFMEPKFEFAVKFNALELDDSDLAIFIAVIL  
LSGDRPGLLNKPIEDIQDNLLQALELQLKLNHPESQLFAKLLQKMTDLRQIVTEHVQLLQVIKKTETD  
MSLHPLLQEIKYDLY

>RRB\_MOUSE

MSTSSHACPVPAVRGHMTHYPAAPYPLLFPVIRGLSLPPLHGLHGHPPSGCSTPSPASVQGACQRTTG  
GSQFAASTKWTPSLNAAIETQSTSSEELVSPSPSPLPPRVYKPCFVCQDKSSGYHYGVSACEGCKGFFR  
RSIQKNMIYTCHRDKNCVINKVTRNRCQYCRFQKCFEVMGSKESVRNDRNKKKKEPSKQECTESYEMTAE  
LDDLTEKIRKAHQETFPSLCQLGKYTTNSSADHRVRLDLGLWDFSELATKCIKIVEFAKRLPGFTGLT  
IADQITLLKAACLDILILRICTRYTPEQDTMTFSDGLTLNRTQMHNAGFGPLTDLVFTFANQLLPLEMDD  
TETGLLSAICLICGDRQDLEEPTKVDKLQEPLLEALKIYIRKRRPSKPHMFPKILMKITDLRSISAKGAE  
RVITLMEIPGSMPLIQEMLENSEGHEPLTPSSSGNIAEHSVSPSSVENSQVSGSPLLQ

>Q866S0\_CAPHI

MVDTEMPFWPTNFGISSVDLSMDDHSHAFDIKPFFTTVDFSSISAPHYEDIPFPRADPMVADYKYDLKQ  
EYQSAIKVEPVSPYYSEKTQLYSKPHEEPSNSLMAIECRVCGDKASGFHYGVHACEGCKGFFRRTIRL  
LIYDRCDLYCRIHKKSRNKCYCRFQKCLAVGMSHNAIRFGRMPQAEKEKLLAEISSDIDQLNPESADLR  
ALAKHLYDSYIKSFPLTRAKARAILTGKTTDKSPFVIYDMNSLMMGEDKIKFKHISPLQEPSKEVAIRIF  
QGCQFRSVEAVQEITEYAKNIPGFVNLDLNDQVTLKYGVHEIIYTMLASLMNKDGVLISEGQGFMTREF  
LKSRLKPFDFMEPKFEFAVKFNALELDDSDLAIFIAVILSGDRPGLLNKPIEDIQDNLLQALELQLK  
LNHPESQLFAKLLQKMTDLRQIVTEHVQLLQVIKKTETDMSLHPLLQEIKYDLY

>Q5RFE5\_PONPY

MTMVDTEMPFWPTNFGISSVDLSVMDDHSHSFDIKPFTTVDFSSISTPHYEDIPFTRTDPMVADYKYDLK  
LQEQSAIKVEPASPPYYSEKTQLYNKPHEEPSNSLMAIECRVCGDKASGFHYGVHACEGCKGFFRRTIR

LKLIYDRCDLNCRIHKKSRNKCRYCRFQKCLAVGMSHNAIRFGRMPQAEKEKLLAEISSDIDQLNPESAD  
 LRALAKHLYDSYIKSFPLTKAKARAILTGKTTDKSPFVIYDMNSLMMGEDKIKFKHITPLQEQSKEVAIR  
 IFQGCQFRSVEAVQEITEYAKSIPGFVNLDLNDQVTLKYGVEIITYTMLASLMNKDGVLISEGQGFMTREF  
 EFLKSLRKPFQDFMEPKFEFAVKFNALELDDSLAIFIAVIILSGDRPGLLNKPIEDIQDNLQALELQ  
 LKLNHPESQLFAKLLQKMTDLRQIVTEHVQLLQVIKKTETDMSLHPLLQEIYKDLY

>PPAT\_RABIT

MVDTEMPFWPTNFGIGSVDLVMDHSHSFDIKPFTTVDFSSISAPHYEDLPFARADPMVADYKYDLKLQ  
 EYQSAIKVEPASPPYYSEKTQLYNKTHEEPSNSLMAIECRVCSKASGFHYGVHACEGCKGFFRRTIRLK  
 LIYDRCDLNCRIHKKSRNKQYCRFQKCLAVGMSHNAIRFGRMPQAEKEKLLAEISSDIDQLNPESADLR  
 ALAKHLYDSYIKSFPLTKAKARAILTGKTTDKSPFVIYDMNSLMMGEDKIKFKHITPLQEQSKEVAIRIF  
 QGCQFRSVEAVQEITEYAKNIPGFVSLDLNDQVTLKYGVEIITYTMLASLMNKDGVLISEGQGFMTREF  
 LKSLRKPFQDFMEPKFEFAVKFNALELDDSLAIFIAVIILSGDRPGLLNKPIEDIQDNLQALELQK  
 LNHPEASQLFAKLLQKMTDLRQIVTEHVQLLQVIKKTETDMSLHPLLQEIYKDLY

>Q92019\_XENLA

MYENVDVSPTHYHMMDFYSHNRQCLWPEKRINPYGTPLGTQHWSSSNHSIETQSTSSEEIVSPSPSPPL  
 PRIYKPCFVCQDKSSGYHYGVSAPEGCKGFFRRSIQKNMVYTCRDKNCIINKVTRNRCQYCRQLQKCFEV  
 GMSKESVRNDRNKKKKEPPKVDVMESYVLSPETQDLIEKVRKAHKETFPALCQLGKYTTNFSSEERVSLD  
 IDLWDFSELSTKCIKTVFAKQLPGFTTLTIADQITLLKSACLDILILIRICTRYTPDQDQTMFTSDGLT  
 LNRTQMHNAGFGPLTDLVFAFANQLLPLEMDDAETGLLSAICLICGDRQDLEQPKVDKLEPPLLEALKI  
 YVRNRRPKPHMFPKMLMITDLRSISAKGAERVITLMEIPGSMPLIQEMLENSEGLDTLGGGASSQT  
 PVTPVAPGSCSPSLSPSSTHSSPSSHSP

>Q8JHU6\_ANAPL

MVDTEMPFWPTNFGIGSVDLVMDHSHSFDTKPFTTVDFSSISAPHYEDLPFARADPMVADYKYDLKLQ  
 EYQSAIKVEPASPPYYSEKTQLYNKTHEEPSNSLMAIECRVCGDKASGFHYGVHACEGCKGFFRRTIRLK  
 LIYDRCDLNCRIHKKSRNKQYCRFQKCLAVGMSHNAIRFGRMPQAEKEKLLAEISSDIDQLNPESADLR  
 ALAKHLYDSYIKSFPLTKAKARAILTGKTTDKSPFVIYDMNSLMMGEDKIKFKHITPLQEQSKEVAIRIF  
 QGCQFRSVEAVQEITEYAKNIPGFVSLDLNDQVTLKYGVEIITYTMLASLMNKDGVLISEGQGFMTREF  
 LKSLRKPFQDFMEPKFEFAVRFNALELDDSLAIFIAVIILSGDRPGLLNKPIEDIQDNLQALELQK  
 LNHPEASQLFAKVLQKMTDLRQIVTEHVQLLHVVIKKTETDMSLHPLLQEIYKDLY

>Q8HXA4\_RABIT

MVDTEMPFWPTNFGIGSVDLVMDHSHSFDIKPFTTVDFSSISAPHYEDLPFARADPMVADYKYDLKLQ  
 EYQSAIKVEPASPPYYSEKTQLYNKTHEEPSNSLMAIECRVCGDKASGFHYGVHACEGCKGFFRRPIRLK  
 LIYDRCDLNCRIHKKSRNKQYCRFQKCLAVGMSHNAIRFGRMPGAEKEKLLAEISSDIDQLNPESADLR  
 ALAKHLYDSYIKSFPLTKAKARAILTGKTTDKSPFVIYDMNSLMMGEDKIKFKHITPLQEQSKEVAIRIF  
 QGCQFRSVEAVQEITEYAKNIPGFVSLDLNDQVTLKYGVEIITYTMLASLMNKDGVLISEGQGFMTREF  
 LKSLRKPFQDFMEPKFEFAVKFNALELDDSLAIFIAVIILSGDRPGLLNKPIEDIQDNLQALELQK  
 LNHPEASQLFAKLLQKMTDLRQIVTEHVQLLQVIKKTETDMSLHPLLQEIYKDLY

>PPAT\_RAT

MGETLGDPPVDPEHGAFADALPMSTSQEITMVDTEMPFWPTNFGISSVDLMDHSHSFDIKPFTTVDF



SSISAPHYEDIPFTRADPMVADYKYDLKLQEYQSAIKVEPASPPYYSEKTQLYNRPHEEPSNSLMAIECR  
 VCGDKASGFHYGVHACEGCKGFFRRTIRLKLIIYDRCDLNCRIHKKSRNKCYCRFQKCLAVGMSHNAIRF  
 GRMPQAEKEKLLAEISSDIDQLNPESADLRALAKHLYDSYIKSFPLTKAKARAILTGKTTDKSPFVIYDM  
 NSLMMGEDKIKFKHITPLQEQSKEVAIRIFQGCQFRSVEAVQEITEYAKNIPGFINLDLNDQVTLKYG  
 HEIIYTMLASLMNKDGVLISEGQGFMTREFLKSRLKPFQDFMEPKFEFAVKFNALELDDSDLAIFIAVII  
 LSGDRPGLLNKPIEDIQDNLLQALELQLKLNHPESQLFAKVLQKMTDLRQIVTEHVQLLHVIKKTETD  
 MSLHPLLQEIYKDLY

>PPAT\_CRIGR

MVDTEMPFWPTNFGISSVDLSMMDHSHSFDIKPFTTVDFSSISAPHYEDIPFTRADPMVADYKYDLKLQ  
 EYQSAIKVEPASPPYYSEKAQLYNRPHEEPSNSLMAIECRVCGDKASGFHYGVHACEGCKGFFRRTIRL  
 LIYDRCDLNCRIHKKSRNKCYCRFQKCLAVGMSHNAIRFGRMPQAEKEKLLAEISSDIDQLNPESADLR  
 ALAKHLYDSYIKSFPLTKAKARAILTGKTTDKSPFVIYDMNSLMMGEDKIKFKHITPLQEQSKEVAIRIF  
 QGCQFRSVEAVQEITEYAKNIPGFINLDLNDQVTLKYGHEIIYTMLASLMNKDGVLISEGQGFMTREF  
 LKSLRKPFQDFMEPKFEFAVKFNALELDDSDLAIFIAVII LSGDRPGLLNKPIEDIQDNLLQALELQLK  
 LNHPESQLFAKVLQKMTDLRQIVTEHVQLLHVIKKTETDMSLHPLLQEIYKDLY

>PPAT\_MOUSE

MGETLGDSVPDPEHGAFADALPMSTSQEITMVDTEMPFWPTNFGISSVDLSVMEDHSHSFDIKPFTTVDF  
 SSISAPHYEDIPFTRADPMVADYKYDLKLQEYQSAIKVEPASPPYYSEKTQLYNRPHEEPSNSLMAIECR  
 VCGDKASGFHYGVHACEGCKGFFRRTIRLKLIIYDRCDLNCRIHKKSRNKCYCRFQKCLAVGMSHNAIRF  
 GRMPQAEKEKLLAEISSDIDQLNPESADLRALAKHLYDSYIKSFPLTKAKARAILTGKTTDKSPFVIYDM  
 NSLMMGEDKIKFKHITPLQEQSKEVAIRIFQGCQFRSVEAVQEITEYAKNIPGFINLDLNDQVTLKYG  
 HEIIYTMLASLMNKDGVLISEGQGFMTREFLNLRKPFQDFMEPKFEFAVKFNALELDDSDLAIFIAVII  
 LSGDRPGLLNKPIEDIQDNLLQALELQLKLNHPESQLFAKVLQKMTDLRQIVTEHVQLLHVIKKTETD  
 MSLHPLLQEIYKDLY

>Q7ZTI3\_BRARE

MYESVDVVGLTSPNPFSLMDYYHQNRGCLIPDKGLVSGAARGFRNPHWGSNHSVETQSTSSEEIVPSP  
 PSPPPPRVYKPCFVCQDKSSGYHYGVSACEGCKGFFRRSIQKNMVTCHREKSCI INKVTRNRCQYCR  
 QKCLEVGMSKESVRNDRNKRKDDKKQECLENYVLSPDTEKMIEQVRKAHQETFPPLCQLGKYTTNNSAD  
 HRVALDVDLWDFSELSTKCI IKTVEFAKQLPGFTTLTIADQITLLKAACLDILILRICTRYTPDQDTMT  
 FSDGLTLNRTQMHNAGFGPLTDLVFAFANQLLPLEMDDAETGLLSAICLLCGDRQDLEQSDKVDELQEPL  
 LEALKIYVRNRRPHKPHMFPKMLMKITDLRSISAKGAERVITLKMIEPGSMPPLIQEMLENSEGLEGGGS  
 KGAGGGGGGGGKAPPGSCSPSLSPSSAHSSPSAHS

>Q90272\_BRARE

MYESVDVVGLTSPNPFSLMDYYHQNRGCLIPDKGLVSGAARGFRNPHWGSNHSVETQSTSSEEIVPSP  
 PSPPPPRVYKPCFVCQDKSSGYHYGVSACEGCKGFFRRTIQKNMVTCHREKSCI INKVTRNRCQYCR  
 QKCLEVGMSKESVRNDRNKRKDDKKQECLENYVLSPDTEKMIEQVRKAHQETFPPLCQLGKYTTNNSAD  
 HRVALDVDLWDFSELSTKCI IKTVEFAKQLPGFTTLTIADQITLLKAACLDILILRICTRYTPDQDTMT  
 FSDGLTLNRTQMHNAGFGPLTDLVFAFANQLLPLEMDDAETGLLSAICLLCGDRQDLEQSDKVDELQEPL  
 LEALKIYVRNRRPHKPHMFPKMLMKITDLRSISAKGAERVITLKMIEPGSMPPLIQEMLENSEGLEGGGS  
 KGAGGGGGGGGKAPPGSCSPSLSPSSAHSSPSAHS

>Q91391\_BRARE

MYESVDVNPFLMMDYYNQSRGCLIPDKMPHPFSSSIRHQHWSGSNHSIETQSTSSEEIVPSPSPPPPPR  
 IYKPCFVCQDKSSGYHYGVSAPEGCKGFFRRSIQKNMVYTCCHREKNCIINKVTRNRCQYCRLOKCLEVGM  
 SKESVRNDRNKKKKEEKKPECTENYTLSPDTEQMIDRVRKAHQETFPPLCQLGKYTTNSSEERRVALDVD  
 LWDKFSELSTKCI IKTVEFAKQLPGFTTTLTIADQITLLKAAACLDILILIRICTRYTPEQDTMTFSDGLTLN  
 RTQMHNAGFGPLTDLVFAFANQLLPLEMDDAETGLLSAICLLCGDRQDLEQADKVDVLQEPLLEALKIYV  
 RNRPHKPHMFPKMLMKITDLRSISAKGAERVITLKMEIPGSMPLIQEMLENSEGLESSSGAQGSRASA  
 TTPGSCSPSLSPNSAQSSPPTQSP

>Q90271\_BRARE

MYESVDVNPFLMMDYYNQSRGCLIPDKMPHPFSSSIRHQHWSGSNHSIETQSTSSEEIVPSPSPPPPPR  
 IYKPCFVCQDKSSGYHYGVSAPEGCKGFFRRSIQKNMVYTCCHREKNCIINKVTRNRCQYCRLOKCLEVGM  
 SKESVRNDRNKKKKEEKKPECTENYTLSPDTEQMIDRVRKAHQETFPPLCQLGKYTTNSSEERRVALDVD  
 LWDKFSELSTKCI IKTVEFAKQLPGFTTTLTIADQITLLKAAACLDILILIRICTRYTPEQDTMTFSDGLTLN  
 RTQMHNAGFGPLTDLVFAFANQLLPLEMDDAETGLLSAICLLCGDRQDLEQADKVDVLQEPLLEALKIYV  
 RNRPHKPHMFPKMLMKITDLRSISAKGAELLIITLKMEIPGSMPLIQEMLENSEGLESSSGAQGSRASA  
 TTPGSCSPSLSPNSAQSSPPTQSP

>RRG\_BRARE

MFDCMEALGMGPRQLYDVTNRGACMLRKASPFYAGLDPFAWTGTASVRSVETQSTSSEEMVPSSPSPPPP  
 PRVYKPCFVCQDKSSGYHYGVSSCEGCKGFFRRSIQKNMVYTCCHRDKNQCINKVTRNRCQYCRLOKCFEV  
 GMSKEAVRNDNRNKKKDKVDEVI PPESYELSGELEELVNKVSKAHQETFPPLCQLGKYTTNSSSDHRIQL  
 DLGLWDKFSELSTKCI IKIVEFAKRLPGFTTTLTIADQITLLKSACLDILMLIRICTRYTPEQDTMTFSDGL  
 TLNRTQMHNAGFGPLTDLVFAFAGQLLPLEMDDTETGLLSAICLICGDRMDLEEPERVDRLQEPLLEALK  
 IYARRRRPNKPHMFPRLMKITDLRGI STKGAERAITLKMEIPGMPPLIREMLNPEAFEDQSEATEKK  
 PEPEPPAPPPALLTMKKEQEDEDDESWATENGSEPSPEEEDDDDEDGEEERGTDSDGEAWGGQEPNADVS  
 RKSHGGRAQ

>Q9I878\_CHICK

MVDTEMPFVPVNFVNGISVVDLSAMDDHMHSFDIKPFTTVDFSSISSPHYEDIPLGRADQTSIDYKYDIKLO  
 DCQSAIKMEPPSPPYFSEKVQLYNKPHEESSNSLMAIECRVCGDKASGFHYGVHACEGCKGFFRRTIRLK  
 LIYDRCDLNCRIHKKSRNKCQYCRFQKCLAVGMSHNAIRFGRMPQAEKEKLLAEISSDIDQLNPESADLR  
 ALAKHLYDSYIKSFPLTKAKARAILTGKTTDKSPFVIYDMNSLRMGEDQIKCKHASPLQEONKEVAIRIF  
 QRCQFRSVEAVQEITEFAKNI PGFVNLDLNDQVTLKYGVEHIIYTLASLMNKDGVLISDGQGFMTREF  
 LKSLRKPFCDFMEPKFEFAVKFNALELDDSLAIFIAVILSGDRPGLLNKPIEDIQDNLQALELQK  
 LNHPESSQLFAKLLQKMTDLRQIVTEHVQLLQIIKKTETDMSLHPLLQEIYKDLI

>RRA\_XENLA

MSSKDNTCPPPGPHINGFHVPHYAFFPHMLGGMSXTGGLPGVQHQPPLSGYSTPSPATIIETQSTSSEE  
 IVSPPTPPPLPRIYKPCFVCQDKSSGYHYGVSAPEGCKGFFRRSIQKNMVYTCCHRDKNCIINKVTRNRC  
 QYCRLOKCFEVGMSKESVRNDRNKKKESPKPEAIESYILSPETQDLIEKVQKAHQETFPALCQLGKYTT  
 SFSSEQRVSLDIDLWDKFSELSTKCI IKTVEFAKQLPGFTTTLTIADQITLLKSACLDILILIRICTRYTPD  
 QDTMTFSDGLTLNRTQMHNAGFGPLTDLVFAFANQVPLEMDDAETGLLSAICLICGDRQDLEQDPKVDK

LQEPLLEALKIYVTRRPQKPHMFPKMLMKITDLRVTSAKGAERVITLKMEIPGAMPLIQEMLENSEGLD  
TLGGGASSDAPVTPVAPGSCSPSLSPSSTHSSPSTHSP

>Q98SF8\_XENLA

MVDTEMPFWSNLNFGMNSMDMSALEDHCPYDIKPFPTTVDFSSINSHYDDILDEKTFLCRNDQSPIDYKY  
DLKLQECQSSIKLEPPSPPYFSDKPQCSKAFEDTPNSFIAIECRVCGDKASGFHYGVHACEGCKGFFRRT  
IRLKLIIYERCDLNCRHKKSRNKCQFCRFQKCLAVGMSHNAIRFGRMPQAEKEKLLAEISSDIDQLNPES  
ADQRVLAKHLYDSYVKSFPPLTKAKARAILTGRATDKTPVVIHDMNSLMMGEDQIKGQCVSPEQNKEVAIR  
IFQRCQSRSAEAVREITEFAKNI PGFVSLDLNDQVTLKYGVEIIFTMLASLMNKDGLVAEGQGMTR  
EFLKSLRKPFSDFMEPKFEFAIRFNSLELDDSDLAI FVAVI ILSGDRPGLLNKPIEDIQDSSLQALELQ  
LKLNHPDSAQLFAKLLQKMTDLRQVVTEHVQLLQLIKKTEADMCLHPLLQEIYKDLY

>Q6PA31\_XENLA

MVDTEMPFWSNLNFGMNSMDMSALEDHCPYDIKPFPTTVDFSSINSHYDDILDEKTFLCRNDQSPIDYKY  
DLKLQECQSSIKLEPPSPPYFSDKPQCSKAFEDTPNSFIAIECRVCGDKASGFHYGVHACEGCKGFFRRT  
IRLKLIIYERCDLNCRHKKSRNKCQFCRFQKCLAVGMSHNAIRFGRMPQAEKEKLLAEISSDIDQLNPES  
ADQRVLAKHLYDSYVKSFPPLTKAKARAILTGRATDKTPVVIHDMNSLMMGEDQIKGQCVTPEQNKEVAIR  
IFQRCQSRSAEAVREITEFAKNI PGFVSLDLNDQVTLKYGVEIIFTMLASLMNKDGLVAEGQGMTR  
EFLKSLRKPFSDFMEPKFEFAIRFNSLELDDSDLAI FVAVI ILSGDRPGLLNKPIEDIQDSSLQALELQ  
LKLNHPDSAQLFAKLLQKMTDLRQVVTEHVQLLQLIKKTEADMCLHPLLQEIYKDLY

>NR1D2\_MOUSE

MELNAGGVIAYISSSSSASSPASCHSEGENS FQSSSSSVSPSSPNSNCDANGNPKNADISSIDGVLKSD  
RTDCPVKTGKTSAPGMTKSHSGMTKFSGMVLLCKVCGDVASGFHYGVHACEGCKGFFRRSIQQNIQYKCC  
LKNENCSIMRMNRNRCQQCRFKKCLSVGMSRDAVRFGRIPKREKQRMLIEMQSAMKTMNTQFSGHLQND  
TLAEQHDQSALPAQEQLRPKSQLEQENIKNTPSDFAKEEVI GMVTRAHKDTFLYNQEHRENSSESMPPPQR  
GERIPRNMEQYNLNQDHRGSGIHNHFPCSERQQHLSGQYKGRNIMHPNGHAVCIANGHCMNFSSAYTQR  
VCDRIPVGGCSQ TENRNSYLCNTGGRMHLVCPMSKSPYVDPQKSGHEIWEEFMSMFTPAVKEVVEFAKRI  
PGFRDLSQHDQVNLLKAGTFEVL MVRFASLFD AKERTVTFLSGKKYSVDDLHSMGAGDLLSSMFEFSEKL  
NALQLSDEEMSLFTAVVLSADRSGIENVNSVEALQETLIRALRTLIMKNHPNEASIFTKLLLLKLPDLRS  
LNNMHSEELLAFKVHP

>Q8C598\_MOUSE

MELNAGGVIAYISSSSSASSPASCHSEGENS FQSSSSSVSPSSPNSNCDANGNPKNADISSIDGVLKSD  
RTDCPVKTGKTSAPGMTKSHSGMTKFSGMVLLCKVCGDVASGFHYGVHACEGCKGFFRRSIQQNIQYKCC  
LKNENCSIMRMNRNRCQQCRFKKCLSVGMSRDAVRFGRIPKREKQRMLIEMQSAMKTMNTQFSGHLQND  
TLAEQHDQSALPAQEQLRPKSQLEQENIKNTPSDFAKEEVI GMVTRAHKDTFLYNQEQRENSSESMPPPQR  
GERIPRNMEQYNLNQDHRGSGIHNHFPCSERQQHLSGQYKGRNIMHPNGHAVCIANGHCMNFSSAYTQR  
VCDRIPVGGCSQ TENRNSYLCNTGGRMHLVCPMSKSPYVDPQKSGHEIWEEFMSMFTPAVKEVVEFAKRI  
PGFRDLSQHDQVNLLKAGTFEVL MVRFASLFD AKERTVTFLSGKKYSVDDLHSMGAGDLLSSMFEFSEKL  
NALQLSDEEMSLFTAVVLSADRSGIENVNSVEALQETLIRALRTLIMKNHPNEASIFTKLLLLKLPDLRS  
LNNMHSEELLAFKVHP

>Q7TNH1\_MESAU

MVDTESPICPLSPLEADDLESPLSEEFLOEMGNIQDISQSLEEESGFSFSDTYQYLGSCPGSEGSVITD  
 TLSPASSPSSVSCPVIIPASTDESPGSALNIECRICGDKASGYHYGVHACEGCKGFFRRTIRLKLAYDKCD  
 RCKIQKKNRNCQYCRFHKCLSVGMSHNAIRFGRMPRSEKAKLKAELTCEHDLSETADLKSLAKRI  
 HEAYLKNFNMNKVKARVILAGKTSNNPPFVIHDMETLCAEKTIVAKMVANGIQNKEAEVRI FHCCQCMS  
 VETVTELTEFAKAI PGFANLDLNDQVTLLKYGVYEAIFTMLSSLMNKDGMLIAYGNFITREFLKNLRKP  
 FCDILEPKFDFAMKFNALELDDSDISLFVAAIICCGDRPGLLNIGYIEKMQEGIVHVLKHLQSNHPDDT  
 FLFPKLLQKMVDLRQLVTEHAQLVQVIKKTESDAALHPLLQEIYRDMY

>PPAS\_MOUSE

MEQPQEETPEAREEEKEEVAMGDGAPELNGGPEHTLPSSSCADLSQNSSPSSLLDQLQMGCDGASGGSIN  
 MECRVCGDKASGFHYGVHACEGCKGFFRRTIRMKLEYEKCDRICKIQKKNRNCQYCRFQKCLALGMSHN  
 AIRFGRMPEAEKRKLVAGLTASEGCQHNPQLADLKAFSKHIYNAYLKNFNMTKKKARSILTGKSSHNAPF  
 VIHDIETLWQAEKGLVWKQLVNGLPYNEISVHVIFYRCQSTTVETVRELTEFAKNI PNFSLSFLNDQVTL  
 LKYGVHEAIFAMLASIVNKDGLLVANGSGFVTHEFLRSLRKPFSDIIEPKFEFAVKFNALELDDSDLALF  
 IAAIILCGDRPGLMNPQVEAIQDTILRALEFHLQVNHPSQYLFPKLLQKMADLRQLVTEHAQMMQWLK  
 KTESETLLHPLLQEIYKDMY

>PPAS\_HUMAN

MEQPQEEAPEVREEEKEEVAEAEAGAPELNGGPQHALPSSSYTDLSRSSSPSSLLDQLQMGCDGASCGSL  
 NMECRVCGDKASGFHYGVHACEGCKGFFRRTIRMKLEYEKCSCKIQKKNRNCQYCRFQKCLALGMSH  
 NAIRFGRMPEAEKRKLVAGLTANEGSQYNPQVADLKAFSKHIYNAYLKNFNMTKKKARSILTGKASHTAP  
 FVIHDIETLWQAEKGLVWKQLVNGLPYKEISVHVIFYRCQCTTVETVRELTEFAKSIPFSLSFLNDQVT  
 LLKYGVHEAIFAMLASIVNKDGLLVANGSGFVTREFLRSRKPFSDIIEPKFEFAVKFNALELDDSDLAL  
 FIAAIILCGDRPGLMNPVPRVEAIQDTILRALEFHLQANHPDAQYLFPKLLQKMADLRQLVTEHAQMMQRI  
 KKTETETSLHPLLQEIYKDMY

>Q99ND3\_RAT

MEQPQEETPEAREEEKEEVATGDGAPELNGGPEHTLPSSSCTDLSQNSSPSSLLDQLQMGCDGASGGSIN  
 MECRVCGDKASGFHYGVHACEGCKGFFRRTIRMKLKYEKCDRICKIQKKNRNCQYCRFQKCLALGMSHN  
 AIRFGRMPEAEKRKLVAGLTASEGCQNPQLADLKAFSKHIYNAYLKNFNMTKKKARSILTGKSSHNAPF  
 I IHDIETLWQAEKGLVWKQLVNGPPYNEISVHVIFYRCQSTTVETVRELTEFAKNI PNFSLSFLNDQVTL  
 LKYGVHEAIFAMLASIVNKDGLLVANGSGFVTHEFLRSIRKPFSDIIEPKFEFAVKFNALELDDSDLALF  
 IAAIILCGDRPGLMNPVQVEAIQDTILQALEFHLQVNHPSQYLFPKLLQKMADLRQLVTEHAQMMQWLK  
 KTESETLLHPLLQEIYKDMY

>PPAR\_RAT

MVDTESPICPLSPLEADDLESPLSEEFLOEMGNIQEISQSLGEESSGFSFADYQYLGSCPGSEGSVITD  
 TLSPASSPSSVSCPAPTSTDESPGNALNIECRICGDKASGYHYGVHACEGCKGFFRRTIRLKLAYDKCD  
 RCKIQKKNRNCQYCRFHKCLSVGMSHNAIRFGRMPRSEKAKLKAELTCEHDLKSETADLKSLAKRI  
 HEAYLKNFNMNKVKARVILAGKTSNNPPFVIHDMETLCAEKTIVAKMVANGVENKEAEVRFHCCQCMS  
 VETVTELTEFAKAI PGFANLDLNDQVTLLKYGVYEAIFTMLSSLMNKDGMLIAYGNFITREFLKNLRKP  
 FCDIMEPKFDFAMKFNALELDDSDISLFVAAIICCGDRPGLLNIGYIEKLQEGIVHVLKHLQSNHPDDT  
 FLFPKLLQKMVDLRQLVTEHAQLVQVIKKTESDAALHPLLQEIYRDMY

>PPAR\_CANFA

MVDTESPICPLSPLEADDLESPLSEEFLOEMGNIQEISQSIGEDSSGSFSFTEYQYLGSGPGSDGSVITD  
 TLPSPAPSSSVTHPAAPGGAAEPSSVALNIECRICGDRASGYHYGVHACEGCKGFFRRTIRLKLAYDKCD  
 RCKIQKKNRNKCQYCRFHKCLSVGMASHNAIRFGMRPSEKAKLKAEILTCEQDPEDAETADLKS LAKRI  
 YEAYLKNFNMNKVKARVILAGKASNNPPFVIHDMETLCMAEKT LVAKLVANGIQNKEAEVRI FHCCQCTS  
 VETVTELTEFAKSI PGFANLDLNDQVTLTKYGVYEAIFAMLSSVMNKDGMLVAYGNNGFITREFLKS LKRP  
 FCDIMEPKFDFAMKFNALELDDSDISLFVAAIICCGDRPGLLNVGHIKMQEGIVHVLKHLQTNHPDNI  
 FLFPKLLQKMADLRQLVTEHAQLVQVIKKTESDAALHPLLQEIYRDMY

>NR1D2\_RAT

MELNAGGVIAYISSSSSASSPASCHSEGENS FQSSSSSVSSPNSNCDANGNPKNTDVSSIDGVLKSD  
 RTDCPVKTGKPGAPGMTKSHSGMTKFSGMVLLCKVCGDVASGFHYGVHACEGCKGFFRRSIQQNIQYKCC  
 LKNENCSIMRMRNRRCQQCRFKKCLSVGMSRDAVRFGRI PKREKQRMLIEMQSAMKTMMSQFGGHLQSD  
 TLAEPHEQSVPPAQEQLRPKPQLEQENIKSTPPPSDFAKEEVI GMVTRAHKDTFLYNQEHRENSSESMP  
 HRGERIPRNVEQYNLNDHRGGGLHSHFPCSESQQHLSGQYKGRNMMHYPNGHTVCISNGHCVNFSSAYP  
 QRVCDRIPVGGCSQTESRNSYLCSTGGRMHLVCPMSKSPYVDPQKSGHEIWEEFSMSFTPAVKEVVEFAK  
 RIPGFRDLSQHDQVNLLKAGTFEVL MVRFASLFDAKERTVTFLSGKKYSVDDLHSMGAGDLLSSMFEFSE  
 KLNLQLSDEEMSLFTAVVLVSADRSGIENVNSVEALQETLIRALRTLIMKNHPNEASIFTKLLLKLPLD  
 RSLNNMHSEELLAFKVHP

>Q6I9S1\_HUMAN

MEVNAGGVIAYISSSSSASSPASCHSEGENS FQSSSSSVSSPNSNSDINGNPKNGDLANIEGILKND  
 RIDCSMKTSSSAPGMTKSHSGVTKFSGMVLLCKVCGDVASGFHYGVHACEGCKGFFRRSIQQNIQYKCC  
 LKNENCSIMRMRNRRCQQCRFKKCLSVGMSRDAVRFGRI PKREKQRMLIEMQSAMKTMMSQFSGHLQND  
 TLVEHHEQTALPAQEQLRPKPQLEQENIKSSSPSSDFAKEEVI GMVTRAHKDTFMYNQEQQENSAESMQ  
 PQRGERIPKNMEQYNLNDHCGNGLSSHPCSESQQHLNGQFKGRNIMHYPNGHAICIANGHCMNFSNAY  
 TQRVCDRVPIDGFSQENENKNSYLCNTGGRMHLVCPMSKSPYVDPHKSQHEIWEEFSMSFTPAVKEVVEFA  
 KRIPGFRDLSQHDQVNLLKAGTFEVL MVRFASLFDAKERTVTFLSGKKYSVDDLHSMGAGDLLNSMFEFS  
 EKLNALQLSDEEMSLFTAVVLVSADRSGIENVNSVEALQETLIRALRTLIMKNHPNEASIFTKLLLKLPLD  
 LRSLNNMHSEELLAFKVHP

>PPAR\_HUMAN

MVDTESPLCPLSPLEAGDLESPLSEEFLOEMGNIQEISQSIGEDSSGSFGFTEYQYLGSCPGSDGSVITD  
 TLPSPASSSVTYPVVPGSVDES PSGALNIECRICGDKASGYHYGVHACEGCKGFFRRTIRLKLVDKCD  
 RCKIQKKNRNKCQYCRFHKCLSVGMASHNAIRFGMRPSEKAKLKAEILTCEHDIEDSETADLKS LAKRI  
 YEAYLKNFNMNKVKARVILSGKASNNPPFVIHDMETLCMAEKT LVAKLVANGIQNKEAEVRI FHCCQCTS  
 VETVTELTEFAKAI PGFANLDLNDQVTLTKYGVYEAIFAMLSSVMNKDGMLVAYGNNGFITREFLKS LKRP  
 FCDIMEPKFDFAMKFNALELDDSDISLFVAAIICCGDRPGLLNVGHIKMQEGIVHVLRLHLQSNHPDDI  
 FLFPKLLQKMADLRQLVTEHAQLVQI IKKTESDAALHPLLQEIYRDMY

>PPAR\_MOUSE

MVDTESPICPLSPLEADDLESPLSEEFLOEMGNIQEISQSIGEESSGSFGFADYQYLGSCPGSEGSVITD  
 TLPSPASSSVSVPVIPASTDESPGALNIECRICGDKASGYHYGVHACEGCKGFFRRTIRLKLVDKCD  
 RCKIQKKNRNKCQYCRFHKCLSVGMASHNAIRFGMRPSEKAKLKAEILTCEHDLKDESETADLKS LKRI

HEAYLKNFNMNKVKARVILAGKTSNNPPFVIHDMETLCMAEKTLVAKMVANGVEDKEAEVRFHCCQCMS  
 VETVTELTEFAKAI PGFANLDLNDQVTLKYGVEAIFTMLSSLMNKDGMLIAYGNFITREFLKNLRKP  
 FCDIMEPKFDFAMKFNALELDDSDISLFVAAIICCGDRPGLLNIGYIEKLQEGIVHVLKHLQSNHPDDT  
 FLFPKLLQKMVDLRQLVTEHAQLVQVIKKTESDAALHPLLQEIYRDMY

>Q62879\_RAT

MEQPQEETPEAREEEKEEVATGDGAPELNGGPEHTLPSSSCTDLSQNSSPSSLLDQLQMGC DGASGGSLN  
 MECRVCGDKASGFHYGVHACEGCKGFFRRTIRMKLKYEKCDRICKIQKKNRNCQYCRFQKCLALGMSHN  
 AIRFGRMPEAEKRKLVAGLTASEGCQONPQLADLKAFSKHIYNAYLKNFNMTKKKARSILTGKSSHNAPF  
 I IHDIETLWQAEKGLVWKQLVNGPPPYNEISVHVIFYRCQSTTVETVRELTEFAKNI PNFSLSFLNDQVTL  
 LKYGVEAIFAMLASIVNKDGLLVANGSGFVTHEFLRSIRKPFSDIIEPKFEFAVKFNALELVDSDLALF  
 IAAIILCGDRPGLMNVQVEAIQDTILQALEFHLQVNHPSQYLFPKLLQKMADLRQLVTEHAQMMQWLK  
 KTESETLLHPLLQEIYKDMY

>Q9I8W4\_CHICK

MVDTENQLYPLTPLEEDDIGSPLSGEFLQDMENIQDISQSLGDDSSGALSLTEFQSLGNPGSDGSVITD  
 TLPASSPSSINFATAPGSI DESPSGAENIECRICGDKASGYHYGVHACEGCKGFFRRTIRLKL IYDKCD  
 RNCKIQKKNRNCQYCRFQKCLSVGMSHN AIRFGRMPRSEKAKLKAELTGENYVEDSEMADLKS LAKRI  
 HDAYLKNFNMNKVKARVILAGKTNNNPPFVIHDMETLCMAEKTLVAKLVANGIQNKEAEVRI FHCCQCTS  
 VETVTELTEFAKSI PGFSNLDLNDQVTLKYGVEAIFAMLASVMNKDGMLVAYGNFITREFLKS LRKP  
 FCDIMEPKFDFAMKFNALELDDSDISLFVAAIICCGDRPGLVNVGHIEKMQESIVHVLKHLQTNHPDDI  
 FLFPKLLQKMADLRQLVTEHAQLVQI IKKTESDAHLHPLLQEIYRDMY

>NR1H2\_HUMAN

MSSPTTSSLDTPLPGNPPQPGAPSSSPTVKEEGPEPWGGPDPDVPGTDEASSACSTDWVI PDPEEEPE  
 RKRKKGPAKMLGHELRCRVCGDKASGFHYNVLSCEGCKGFFRRSVVRGGARRYACRGGGTCQMDAFMRK  
 CQQCRLRKCKEAGMREQCVLSEEQIRKKKIRKQQQESQSQSQSPVGPQGSSSSASGPGASPGGSEAGSQ  
 GSGEGEGVQLTAAQELMIQQLVAAQLQCNKRSFSDQPKVTPWPLGADPQSRDARQQRFAHFTELA IISVQ  
 EIVDFAKQVPGFLQLGREDQIALLKASTIEIMLLETARRYNHETECITFLKDFTYSKDDFHRAGLQVEFI  
 NPIFEFSRAMRRLGLDDAEYALLIAINIF SADRPNVQEPGRVEALQOPYVEALLSYTRIKRPQDQLRFP  
 MLMKLVSLRTLSSVHSEQVFALRLQDKKLPPLLSEIWDVHE

>PPAT\_XENLA

MVDTEMPFWSNLNFGMNSMDMSALEDHCPYDIKPF TTVDFSSINSHYDDILDEKTFLCRNDQSPIDYKY  
 DLKLQECQSSIKLEPPSPPYFSDKPQCSKAFEDTPNSFIAIECRVCGDKASGFHYGVHACEGCKGFFRRT  
 IRLKLIYERCDLNCR IHKKS RNKCQFCRFQKCLAVGMSHN AIRFGRMPQAEKEKLLAEISSDIDQLNPES  
 ADQRVLAKHLYDSYVKSFP LTKAKAPGHPDGQSHRQNSRGYTRHELADDDGGSDQGAVRE PRAEQGGGDS  
 NLPALSVALRGGVREITEFAKNIPGFVSLDLNDQVTLKYGVEIIFTMLASLMNKDGV LVAEGQGMTR  
 EFLKSLRKPFSDFMEPKFEFAIRFNSLELDDSDLAIFVAVIILSGDRPGLLVNKP IEDIQDSSLQALELQ  
 LKLNHPDSAQLFAKLLQKMTDLRQVVTEHVQLLQLIKKTEADMCLHPLLQEIYKDLY

>Q8QGC1\_9AVES

MVDTENQLYPLTPLEEDDIGSPLSGEFLQEMENIQDISQSLGDDSSGALSLTEFQSLGNPGSDGSVITD  
 TLPASSPSSINFATAPGSI DESPSGALNIECRICGDKASGYHXGVHACEGCKGFFRRTIRLKL IYDKCD

RNCKIQKKNRNKCQYCRFQKCLSVGMASHNAIRFGRMPRSEKAKLKAELTGESYIEDSEMADLKSLAKRI  
 HDAYLKNFNMNKVKARVILAGKTNNNPPFVIHMDTLCAEKTIVAKLVANGIQNKEAEVRI FHCCQCTS  
 VETVTELTEFAKSI PGFSNLDLNDQVTLTKYGVYEAIFAMLASVMNKDGMLVAYGNFITREFLKS LRKP  
 FCDIMEPKFDFAMKFNALELDDSDISLFVAAIICCGDRPGLVNVGHIEKMQESIVHVLKHLHLQTNHPDDT  
 FLFPKLLQKMADLRQLVTEHAQLVQI IKKTESDAHLHPLLQE IYRDMY

>Q9QWI0\_RAT

MEQPQEETPEAREEEKEEVATGDGAPELNGGPEHTLPSSSCTDLSQNSSPSSLLDQLQMGCDGASGGSLN  
 MECRVCGDKASGFHYGVHACEGCKGFFRRTIRMKLKYEKCDRICKIQKKNRNKCQYCRFQKCLALGMSHN  
 AIRFGRMPEAEKRKLAVAGLTASEGQONPQLADLKAFSKHIYNAYLKNFNMTKKKARSILTGKSSHNAPF  
 I IHDIETLWQAEKGLVWKQLVNGPRPYNEISVHVIFYRCQSTTVDTVRELTEFAKNIPNFSLSLNDQVTL  
 LKYGVHQAI FAMLASIVNKDGLLVANGSGFVTHEFLRSIRKPFSDIIEPKFEFAVKFNALELDDSDLALF  
 IAAIILCGDRPGLMNVQVEAIQDTILQALEFHLQVNHDPDSQYLFPKLLQKMADLRQLVTEHAQMMQWLK  
 KTESETLLHPLLQE IYKDMY

>Q866Q2\_PIG

MEQPPEEAPEVREEKKKEVAEAEAGGPELNGGPEHSLPSSSCTDLSQSCSPALLDQLQMGCDGASCGGL  
 SMECRVCGDKASGFHYGVHACEGCKGFFRRTIRMKLEYEK CERICKIQKKNRNKCQYCRFQKCLALGMSH  
 NAIRFGRMPEAEKRKLAVAGLTANEGSQHNPQVADLKAFSKHLYSAYLKNFNMTKKKARAILTGKASHTAP  
 FVIHDIETLWQAEKGLVWKQLVNGLPYKEISVHVIFYRCQCTTVETVRELTEFAKSI PSFDHFFLNDQVT  
 LLKYGVHEAIFAMLASIVNKDGLLVANGTGFVTREFLRSIRKPFSDIIEPKFEFAVKFNALELDDSDLAL  
 FIAAIILCGDRPGLMNVQVEAIQDTILRALEFHLQANHPDAQYLFPKLLQKMADLRQLVTEHAQMMQRI  
 KKTETETSLHPLLQE IYKDMY

>Q9I8W3\_CHICK

MEQLQEEVPEVREEEEEEEAVTVPSGASDPSAGPDSLSLSSSYTDLSQSSSPSLSDQLQMGCEETASGA  
 LNVECRVCGDKASGFHYGVHACEGCKGFFRRTIRMKLEYEK CERSCKIQKKNRNKCQYCRFQKCLSLGMS  
 HNAIRFGRMPEAEKRKLAVAGLTASEISCQNPQVADLKAFSKHIYNAYLKNFNMTKKKARGILTGKASSTP  
 QPFVIHMDTLWQAEKGLVWKQLVNGIPYKEIGVHVIFYRCQCTTVETVRELTEFAKSI PSFIGLYLNDQ  
 VTLTKYGVHEAIFAMLASIMNKDGLLVANGNGFVTREFLRTLKRPFNEIMEPKFEFAVKFNALELDDSDL  
 SLFVAAIILCGDRPGLMNVQVEEIQDNILRALEFHLQSNHPDAQYLFPKLLQKMADLRQLVTEHAQLVQ  
 KIKKTETETSLHPLLQE IYKDMY

>Q6P6S7\_RAT

MTTLDNNTGGVITYIGSSGSSPSRTSPESLYSDSSNGSFQSLTQGCPTYFPPSPTGSLTQDPARSFGT  
 VPPSLSDSSPSSASSSSSSSSSSSYNGSPPGSLQVAMEDSSRVSPSKGTSNITKLNMGVLLCKVCGDVA  
 SGFHYGVHACEGCKGFFRRSIQQNIQYKRCLKNENCISIVRINRNCQQCRFKKCLSVGMSRDAVRFGRIP  
 KREKQRM LAEMQANMLANNQLSSLCPLETSPAPHPTSGSVGPSPPPAPAPTPLVGFSSQFPQQLTPRSP  
 SPEPTVEDVISQVARAHREIFTYAHDKLGTS PGNFNANHASGSPPATTPQCWESQGPCSTPNDNNLLAAQ  
 RHNEALNGLRQGPSSYPPTWPSGPAHHSCHQPNSNGHRLCPTHVYSAPEGKAPANGLRQGNTKNVLLACP  
 MNMYPHGRSRTVQEIWEDFSMSFTPAVREVVEFAKHIPGFRDLSQHDQVTLKAGTFEVLVRFASLFN  
 VKDQTVMFLSRTTYSLQELGAMMGDLLNAMFDFSEKLNLSLALTEEELGLFTAVVLVSADRSGMENSASV  
 EQLQKTLRLRALV LKNRPSETSRFTKLLKLPDLRTLNMHSEKLLSFRVDAQ

>Q9N2H4\_RABIT

MEQPPEETPKVREEEKEEVAEAEAGAPELSGGPEHALPSSRYTDLSQSSSPVLLDQLQMGCDGASCGSL  
 NMECRVCGDKASGFHYGVHACEGCKGFFRRTIRMKLEYEKCERSCKIQKKNRNKCQHCRFQKCLALGMSH  
 NAIRFGRMPEAEKRRLVAGLTAVEGHQHSPOVADLKAFFSKHIYNAYLKNFNMTKKKARGILTGKASHTAP  
 FVIHDIETLWQAEKGLVWKQLVNSLPPYKEISVHVIFYRCQYTTVETVRELTEFAKSI PNFSSLFVNDQVT  
 VVKYGVHEAIFAMLASIVNKDGLLVANGSGFVTREFLRSLRKPFSDIIEPKFEFAVKFNALELDDSDLAL  
 FIAAIIICGDRPGLMNVQVEAIQDTILRALEFHLQANHPDAQYFFPKLLQKMADLRQLVTEHAQMMQRI  
 KKTETETLLHPLLQEIKDMY

>PPAR\_PHACI

MVDTESQICPLSPFGDDDLSEPLSEEFLOEMGSIQEISPSIGDDSSGTFFAFAEYRCLGSGPGSDGSIITD  
 TLSPASSPSSVSYPPIAGSADSSSATLNIECRICGDKASGYHYGVHACEGCKGFFRRTIRLKLAYDKCD  
 RSCKIQKKNRNKCQYCRFQKCLSDGMSHNAIRFGRMPRSEKAKLKAELTCEHDLEDSEVADLKS LAKRI  
 YEAYLKNFNMNKIKARII LAGKASNNPPFVIHDMETLCMAEKT LVAKLVANGIQNKEAEVRI FHCCQCTS  
 VETVTELTEFAKSI PGFNSLNLNDQVTLLKYGVYEAIFAMLSVMNKDGMLVAYGNFITREFLKS LKRP  
 FCDIMEPKFDFAMKFNAL ELDDSDISLFVAAIICGDRPGLLVNGHIERMQESIVHVLQLHLQNNHPDDV  
 FLFPKLLQKMADLRQLVTEHAQLVQVIKKTESDAALHPLLQEIRDMY

>Q8BP65\_MOUSE

MSSPTSSLDTPVPGNGSPQPSTSATSPTIKEEGQETDPPPGSEGSSSAYIVEPEDEPERKRKKGPAKML  
 GHELRCVCGDKASGFHYNVLSCEGCKGFFRRSVVHGGAGRYACRSGGTCQMDAFMRRKCQLCRLRKCKEA  
 GMREQCVLSEEQIRKKRIQKQQQQPPPPSEPAASSGRPAASPGTSEASSQGS GEGEIQLTAAQELMI  
 QQLVAAQLQCNKRSFSDQPKVTPWPLGADPQSRDARQQRF AHFTELAII SVQEI VDFAKQVPGFLQGRE  
 DQIALLKASTIEIMLLETARRYNHETECITFLKDFYTSKDDFHRAGLQVEFINPIFEFSRAMRRLGLDDA  
 EYALLIAINIF SADRPNVQEPSRVEALQQPYVEALLSYTRIKRPQDQLRFPRMLMKLVSLRTLSSVHSEQ  
 VFALRLQDKKLPLLSEIWDVHE

>Q90970\_CHICK

MSQRELRQRFVILFACTIFSEQLLL GKQLNGRSSEGS DGAPKSDRLEEAVKPSQSGVAGLTKGHNGVTK  
 FNGMVLLCKVCGDVASGFHYGVHACEGCKGFFRRSIQQNIQYKCKLKNNNCSIMRMNRNRCQQCRFKKCL  
 SVGMSRDAVRFGRIPKREKQRM LIEMQSAMKTMNSQFSSHL PNEALAEHQDQAPQEDLSSKPKQERETL  
 KSPSPSSDMAKEEVIGMVT RVHKDTFMYNQEQSQNPAEMMQPQSGERVS KNTEQYMLSSEHCVSGLSGP  
 QYPDSEQHLGGQYKGRSTMHYPSGHAICFTNGHCMNFTNGYTQRLCDRIPEDVFS PNRNTYSCNTGGRM  
 HLVC PMSKTPHVDPNKS GHEVWEEFSLSFTPAVKEVVEFAKRI PGFRDLSQHDQVNLLKAGT FEVLMVRF  
 ASLFDARERTVTF LSGKKYSVDDLHSMGAGDLLNSMFEFSEKLNALQLSDEEMSLFTAVVLSADRSGIE  
 NVNSVEALQETLIRALRTLIMKNHPNEASIFTKLLLKLPDLRSLNNMHSEELLAFKVHP

>NR1H3\_RAT

MSLWLEAAVPDVSPDSATELWKTEPQDAGDQGGNTCILREEARMPQSTGGALRIGLESSEPTALLPRAET  
 LPEPTELRPQKRKKGPAKMLGNE LCSVCGDKASAFHYNVLSCEGCKGFFRRSVIKGARYICHSGGHCPM  
 DTYMRRKCQECRLRKRHAGMREECVLSEEQIRLKKLKRQEEEAQATS VSPRVSSPPQVLPQLSPEQLG  
 MIEKLVAQQQCNRRSFSDRLRVTWPPIAPDPQSRREARQQRF AHFTELAIVSVQEI VDFAKQLPGFLQLS  
 REDQIALLKTS AIEVMLETSRRYNPGSESITFLKDFSYNREDFAKAGLQVEFINPIFEFSRSMNELQLN  
 DAEFALLIAISIF SADRPNVQDQLQVERLQHTYVEALHAYVS INHPHDLRMFPRMLMKLVSLRTLSSVHS



EQVFALRLQDKKLPPLLSEIWDVHE

>PPAR\_CAVPO

MVDMESPLCPLSPLEAEDLESPLSEYFLQEMGTIQDISRSLGEDSSSGSFGFPPEYQYLGSFGSDGSGVITD  
 TLSPASSPSSVSYPEVPCGVDEPPSSALNIECRICGDKASGYHYGVHACEGCKGFFRRTIRLKLKLVYDKCD  
 RCKIQKKNRNKCQYCRFHKCLSVGMASHNAIRFGMRPSEKAKLKAEVLTCDRDSEGAETADLKS LAKRI  
 YEAYLKNFHMNKVKARI ILAGKTSSHPLFVIHDMETLCTAEKTLMAKVSDGIRDKEAEVRI FHCCQCVS  
 VETVTNLTEFAKAI PGFASLDLNDQVTLTKYGVYEAIFTMLSSTMNKDGMLVAYGHGFITREFLKNLRKP  
 FCDMMEPKFNFAMKFNALELDDSDISLFVAAI ICCGDRPGLLNIDHIEKMQEAIHVHLKHLQSNHPDDT  
 FLFPKLLQKLADLRQLVTEHAQLVQVIKTESDAALHPLLQE IYRDMY

>NR1H3\_MOUSE

MSLWLEASMPDVSPDSATELWKTEPQDAGDQGGNTC I LREEARMPQSTGVALGIGLESAEPTALLPRAET  
 LPEPTELRPQKRKKGPAPKMLGNELCVCGDKASGFHYNVLSCEGCKGFFRRSVIKGARYVCHSGGHCPC  
 DTYMRRKCQECLRKCRQAGMREECVLSSEEQIRLKKLKRQEEEAQAQATSVSPRVSSPPQVLPQLSPEQLG  
 MIEKLVAQQQCNRRSFSDRLRVTPWPIAPDPQSREARQRF AHFTELAIVSVQEI VDFAKQLPGFLQLS  
 REDQIALLKTS AIEVMLETSRRYNPGSESITFLKDFSYNREDFAKAGLQVEFINPI FEFSTRAMNELQLN  
 DAEFALLIAISIF SADRPNVQDQLQVERLQHTYVEALHAYVS INHPHDRLMFPRLMLKLVSLRTLSSVHS  
 EQVFALRLQDKKLPPLLSEIWDVHE

>Q91X41\_MOUSE

MSLWLEASMPDVSPDSATELWKTEPQDAGDQGGNTC I LREEARMPQSTGVALGIGLESAEPTALLPRAET  
 LPEPTELRPQKRKKGPAPKMLGNELCVCGDKASGFHYNVLSCEGCKGFFRRSVIKGARYVCHSGGHCPC  
 DTYMRRKCQECLRKCRQAGMREECVLSSEEQIRLKKLKRQEEEAQAQATSVSPRVSSPPQVLPQLSPEQLG  
 MIEKLVAQQQCNRRSFSDRLRVTPWPIAPDPQSREARQRF AHFTELAIVSVQEI VDFAKQLPGFLQLS  
 REDQIALLKTS AIEVMLETSRRYNPGSESITFLKDFSYNREDFAKAGLQVEFINPI FEFSTRAMNELQLN  
 DAEFALLIAISIF SADRPNVQDQLQVERLQHTYVEALHAYVS INHPHDPLMFPRLMLKLVSLRTLSSVHS  
 EQVFALRLQDKKLPPLLSEIWDVHE

>Q9U3Y4\_AEDAL

MMKRRWSNNGGF TALRMLDDSSSEVTSSSAALGMTMSPNSLGSFPNYDELELWSSYEDNAYNGHSVLSNGN  
 NNLGGCGAANNLLMNGIVGNNNLNGMMNMQAVQANANSIQHIVGNLINGVNPNTLIPPLPSIIQNTL  
 MNTPRSESVNSISSGREDLSPSSSLNGYTDGSDAKKQKKGPTPRQQEELCLVCGDRASGYHYNALTCEGC  
 KGFRRSVTKNAVYCKFGHACEMDMYMRKCQECLRKCLAVGMRPECVVPENQCAIKRKEKKAQKEKD  
 KVQTNATVSTNSTYRSEILPILMKCDPPHQAI PLLPEKLLQENRLRNI PLLTANQMAVIYKLIWYQDG  
 YEQPSEEDLKRIMIGSPNEEDQHDVHFRHITEITITLVQLIVEFAKGLPAFTKIPQEDQITLLKAC SSE  
 VMMLRMARRYDAATDSILFANNRSYTRDSYRMAGMADTIEDLLHFRCRQMFSLTVDNVEYALLTAIVIFSD  
 RPGLEQAELVEHIQSYIIDTLRIYILNRHAGDPKCSVIFAKLLSILTELRTLGQNSEMCFSLKLNKRL  
 PRFLEEIWDVQDI PPSMQAQMHSHGTPQSSSSSSSSSSSSSSNGSSNGNSNSNGPHPHGQQLTPNQOQ  
 PPHPQQQHQSQLQVHANGSGSGGASSNNSSSSGGLGVPVGLGGGALDHV

>ECR\_LUCCU

MMKRRWSNNGGF AALKMLEESSSEVTSSSNGLVLSSDINMSPSSLDSPVYGDQEMWLCNDSASYNNSHQH  
 SVITSLQGCTSSLPAQTTI I PLSALPNSNNASLNNQNQNYQNGNSMNTNLSVNTNNSVGGGGGGGVPGM

TSLNGLGGGGGSQVNNHNSHNHLHHNSNSNSNSSSSHHTNGHMGIGGGGGGLSVNINGPNIVSNAQQLN  
 SLQASQNGQVIHANIGIHSII SNGLNHHHHHHMNNSSMMHHTPRSESANSISSGRDDLSPSSSLNGFSTS  
 DASDVKKIKKGPAPRLQEELCLVCGDRASGYHYNALTCGCKGFFRRSVTKNAVYCKFGHACEMDMYMR  
 RKCQECLKKCLAVGMRPECVVPENQCAMKRREKKAQKEKDKIQTSVCATEIKKEILDLMTCPEPPSHPTC  
 PLLPEDILAKCQARNIPPLSYNQLAVIYKLIWYQDGYEQPSEEDLKRIMSSPDENESQHDASFRHITEIT  
 ILTVQLIVEFAKGLPAFTKIPQEDQITLLKACSSEVMMLRMARRYDHNSDSIFFANNRSYTRDSYKMAGM  
 ADNIEDLLHFCRQMYSMKVDNVEYALLTAIVIFSDRPGLEEAEELVEAIQSYIIDTLRIYILNRHCGDPM  
 LVFFAKLLSILTELRLTGNQNAEMCFSLKLNKRLPKFLEEIWDVHAIPPSVQSHIQATQAEKAGPGSSG  
 NNIGHFSSRHILFLHKYLDGNIILIIIVIAIGASTPNGGAVDYVGTDMSSMLVQSDNA

>NR1H2\_RAT

MSSPTSSLDTPLPGNGSPQPSTSSSTSPTIKEEGQETDPPPGESESSSAYIVVILEPEDEPERKRRKKGAP  
 KMLGHELRCVCGDKASGFHYNVLSCEGCKGFFRRSVVHGGAGRYACRGSQMDAFMRRKQCLRLRKC  
 KEAGMREQCVLSEEQIRKKKIQQQQQPPPTPEPASGSSARPAASPGTSEASSQGSGEQEGIQLTAAQE  
 LMIQQLVAAQLQCNKRSFSDQPKVTPWPLGADPQSRDARQQRFHFTELAIISVQEIVDFAKQVPGFLQL  
 GREDQIALLKASTIEIMLLETARRYNHETECITFLKDFYTSKDDFHRAQLQVEFINPIFEFSRAMRRLGL  
 DDAEYALLIAINIFSADRPNVQEPSRVEALQQPYVEALLSYTRIKRPQDQLRFPRLMKLVSLRTLSSVH  
 SEQVFALRLQDKKLPPLLSEIWDVHE

>PPAR\_XENLA

MSTIMVDTNSELCILTPLEDDLESPLSGEFLQDIVDIQDITQTIQDDGSTPFGASEHQFFGNSPGSIGS  
 VSTDLTDTLSPASSPASITFPAASGSAEDAACKSLNLECRVCSKASGFHYGVHACEGCKGFFRRTIRLK  
 LVYDRCEMCKIQKKNRNCQYCRFEKCLNVGMSHNAIRFGRMPRSEKAKLKAEVLQCDQVQKDSQADL  
 LSLARLIYDAYLKNFNMNVKARAILTGKASNPPFVIHDMETLCMAEKTLVAKLVANGIQNKEAEVRIFH  
 CCQCTSVETVTELTEFAKSIPGFTELDLNDQVTLKYGVEAMFAMLASVMNKDGMLVAYGNGFITREFL  
 KSLRKPIGDMMEPKFEFAMKFNALDSDLSLVAALICCGDRPGLVNIPISEKMQESIVHVLKHLHQS  
 NHPDSSFLFPKLLQKMDLRQLVTEHAQLVQTIKKTETDAALHPLLQEIYRDMY

>Q6AXA9\_XENLA

MSTIMVDTNSELCILTPLEDDLESPLSGEFLQDIVDIQDITQTIQDDGSTPFGASEHQFFGNSPGSIGS  
 VSTDLTDTLSPASSPASITFPAASGSAEDAACKSLNLECRVCSKASGFHYGVHACEGCKGFFRRTIRLK  
 LVYDRCEMCKIQKKNRNCQYCRFEKCLNVGMSHNAIRFGRMPRSEKAKLKAEVLQCDQVQKDTQMADL  
 LSLARLIYDAYLKNFNMNVKARAILTGKASNPPFVIHDMETLCMAEKTLVAKLVANGIQNKEAEVRIFH  
 CCQCTSVETVTELTEFAKSIPGFTELDLNDQVTLKYGVEAMFAMLASVMNKDGMLVAYGNGFITREFL  
 KSLRKPIGDMMEPKFEFAMKFNALDSDLSLVAALICCGDRPGLVNIPISEKMQESIVHVLKHLHQS  
 NHPDSSFLFPKLLQKMDLRQLVTEHAQLVQTIKKTETDAALHPLLQEIYRDMY

>Q8IW13\_HUMAN

MPHSAGGTAGVLEAAEPTALLTRAEPPEPTEIRPQKRKKGAPKMLGNELCSVCGDKASGFHYNVLS  
 EGCKGFFRRSVIKGAHYICHSGGHCMPDYMRRKQCECLRLKCRQAGMREECVLSEEQIRLKLKRQEEE  
 QAHATSLPPRASSPPQILPQLSPEQLGMIEKLVAQQQCNRRSFSDRLRVTWPMPADPHSREARQORFA  
 HFTELAIISVQEIVDFAKQLPGFLQLSREDQIALLKTSIAIEVMLETSRRYNPGSESITFLKDFSYNRED  
 FAKAGLQVEFINPIFEFSRAMNELQLNDAEFALLIAISIFSADRPNVQDQLQVERLQHTYVEALHAYVSI  
 HHPHDLRMFPRMLMKLVSLRTLSSVHSEQVFALRLQDKKLPPLLSEIWDVHE





SPQPSTSSHLKRQIVEDMPVLKRVLQAPPLYDTNSLMDEAYKPHKKFRALRHREFETAEDASSSTSGSN  
 SLSAGSPRQSPV PNSVATPPPSAASAAAGNPAQSOLHMLTRSSPKASMASHSVLAKSLMAEPRMTPEQ  
 MKRSDIIQNYLKRENSTAASSTTNGVGNRSPSSSSTPPPSAVQNQQRWGSSSVITTTCCQQRQQSVSPHSN  
 GSSSSSSSSSSSSSSSSSSSTSSNCSSSSASSCQYFQSPHSTSNGTSA PASSSSSGSNSATPLLELQVDIADS  
 AQPLNLSKKSPTPPPSKHLHALVAAANAVQRYPTLSADVTVTASNGGPPSAAASPAPSSSPPASVGSFNPG  
 LSAAVHKVMLEA

>Q8MYA7\_9NEOP

MDLKHEVAYRGLPRQVKAEPGVSHNGHQVNGHVRYWMAGVVGGGSPSPGAATQPPNNGYSSPLSSSSYGP  
 YSPNGKIGREELS PASSVNGCSTDGESRRQKKGPA PRQQEELCLVCGDRASGYHYNALTCEGCKGFFRRS  
 VTKNAVYICKFGHACEMDMYMRKQCQECRLKKCLAVGMRPECVVPETTCAIKRKEKKAQREKDKLPVSTT  
 TVDDHMPPIMQCDPPPPEAARILECLQHEVVPFLSEKLMEQNRLKNIPLLTANQQFLIARLVWYQDGYE  
 QPSEEDLKRVTQTWQSNEDDEEETDL PFRQITEMTILTVQLIVEFAKGLPGFSKISQPDQITLLKAC SSE  
 VMMLRVARRYDAASD SVLFANNQAYTRDNRYKAGMAYVIEDLLHFCRCMYSLSMDNVHYALLTAVVIFSD  
 RPGLEQPQLVEEIQRYLNTLRVYIMNQHSASPRCAVLYAKILSVLTELRTLGMQNSNMCISLKLKNRKL  
 PPFLEEIWDVADVSAAQAPAIMDVATNL

>O76827\_CERCA

MMKRRWSNNGGFALRMLEESSAEVSSSSNGLVLS TTLSPSPLDSPVYGDQDLWYDAAFNGHGGGGGGGAH  
 SVITSAHSCAALLPQTSIIP LGGGVNNTNMNMGAGNPGINFGGSGGGVNGIVGGGSLAHGSQLNGHLGN  
 QLNSHNNNNNNMNMHNNNINTTNMLHATLNQGLINGLMSGVLGVSGGMQHNLNMQQHTPRSDSANSISS  
 GRDDLSPSSSLNGYSANDSCDVKKIKKGPAPRLQEELCLVCGDRASGYHYNALTCEGCKGFFRRSVTKNA  
 VYCKFGRSCEMDMYMRKQCQECRMKKCLAVGMRPECVVPENQCAMKRREKKAQKEKEKQTGNSPIICK  
 TESIKNEILELMNCEPPSHPTCPLLPDDIVAKCKASNIPLPTRNQLAVIYKLIWYQDGYEQPSEEDLKRI  
 MSTPDENESPNDISFRHITEITILTVQLIVEFAKGLPAFTKIQEDQITLLKACSSVMMMLRMARRYDHN  
 SDSIFFANNRSYTRDAYKMAGVADNIEDLLHFCRQMYSMKVDNVEYALLTAIVIFSDRPGLEKAQLVEEIQ  
 QSYIIDTLRVYIINRHCGDSMSLVFFAKLLSILTELRTLGNQNAEMCFSLKLKNRKLKPFLEEIWDVHAV  
 PPSVQSHIQATQAEREGLEPNTAVATTSTSAASSSPVRPLTW

>Q8IQS3\_DROME

MLMSADSSDSAKTSVICSTVSASMLAPPAEQPSTTAPPILGVTGRSHLENALKLPPNTSVSAYYQHNSK  
 LGMGQNYNPEFRSLVAPVTDLDTVPPTGVTMASSSNSPNSSVKLPHSGVIFVSKSSAVSTTDGPTAVLQQ  
 QQPQQMPQHFE SLPHHPQQEHQPQQQQQHHLQHHPHVMYPHGYQQANLHHSGGIAVVPADSRPQT  
 PEYIKSYVMDTTVASSVKGEPELNI EFDGTTVLCRVC GDKASGFHYGVHSCEGCKGFFRRSIQQKIQYR  
 PCTKNQCSILRINRRCQYCRLLKCI AVGMSRDAVRFGRVPKREKARILAAMQQSTQNRGQQRALATEL  
 DDQPRLLAAVLAHLETCEFTKEKVSAMRQRARD CPSYSMPTLLACPLNPAPELQSEQEF SQRFAHVIRG  
 VIDFAGMIPGFQLLTQDDKFTLLKAGLFDALFVRLICMFDSINSIICLNGQVMRRDAIQNGANARFLVD  
 STFNF AERMNSMNLDAEIGLFC AIVLITPDRPGLRNLELIEKMSRLKGCLQYIVAQNRPDQPEFLAKL  
 LETMPDLRTLSTLHTEKLVVFRTEHKELLRQMQMSMEDGNNSDGOQNKSPSGSWADAMDVEAAKSP LGSV  
 SSTESADLDYGS PSSSQPQGVSLPSPQQQPSALASSAPLLAATLSGGCPLRNRANS GSSGDSGAAEMDI  
 VGS SHAHTQNGLTITPIVRHQQQQQQQQIGILNNAHSRNLNGGHAMCQQQQQHPQLHHLTAGAARYRK  
 LDSPTDSGIESGNEKNECKAVSSGGSSSCSSPRSSVDDALDCSDAAANHNQVVQHPQLSVSVSPVRSPO  
 PSTSSHLKRQIVEDMPVLKRVLQAPPLYDTNSLMDEAYKPHKKFRALRHREFETAEDASSSTSGSNSLS  
 AGSPRQSPV PNSVATPPPSAASAAAGNPAQSOLHMLTRSSPKASMASHSVLAKSLMAEPRMTPEQMKR

SDIIQNYLKRENSTAASSTNGVGNRSPSSSSTPPPSAVQNQQRWGSSSVITTTTCQQRQQSVSPHNSGSS  
SSSSSSSSSSSSSSSTSSNCSSSSASSCQYFQSPHSTSNGTSAFSSSSSGSNSATPLLELQVDIADSAQP  
LNLKSKSPTPPPSKLHALVAAAANAVQRYPTLSADVTVTASNGGPPSAAASPAPSSSPASVGSFNPGLSA  
AVHKVMLEA

>E75A\_DROME

MLMSADSSDAKTSVICSTVSASMLAPPAPEQPSTTAPPILGVTGRSHLENALKLPPNTSVSAYYQHNSK  
LGMGQNYNPEFRSLVAPVTDLDTVPPTGVTMASSSNSPNSSVKLPHSGVIFVSKSSAVSTTDGPTAVLQQ  
QQPQQQMPQHFESELPHHHPQOEHPQQQQQQHHLQHHPHPHVMYPHGYQQANLHHSGGIAVVPADSRPQT  
PEYIKSYPVMDTTVASSVKGEPELNIEFDGTTVLCRVCGDKASGFHYGVHSCEGCKGFFRRSIQQKIQYR  
PCTKNQQCSILRINRNCQYCRLLKCIAVGMSRDAVRFGRVFKREKARILAAMQQSTQNRGQQRALATEL  
DDQPRLLAAVLRHLETCEFTKEKVSAMRQRARDPCPSYMPPTLLACPLNPAPELQSEQEFQFAHVIRG  
VIDFAGMIPGFQLLTQDDKFTLLKAGLFDALFVRLICMFDSSINSIIICLNGQVMRRDAIQNGANARFLVD  
STFNFAERMNSMNLDAEIGLFCIAIVLITPDRPGLRNLELIEKMSRLKGCLOQYIVAQNRPDQPEFLAKL  
LETMPDLRRTLSTLHTEKLVVFRTEHKELLRQQMWSMEDGNNSDGQONKSPSGSWADAMVAAKSPPLGSV  
SSTESADLDYGSPSSSQPGVSLPSPPPQQQPSALASSAPLLAATLSGGCPLRNRANSNGSSGDSGAAEMDI  
VGSHAHLTQNGLTITPVRHQQQQQQQQIGILNNAHSRNLNNGGHAMCQQQQQHPQLHHHLTAGAARYRK  
LDSPTDSGIESGNEKNECKAVSSGGSSSSCSPRSSVDDALDCSDAAANHNQVVQHPQLSVSVSPVRSPO  
PSTSSHLKRQIVEDMPVLKRVLQAPPLYDTNSLMDEAYKPHKKFRALRHREFETAADASSSTSGSNSLS  
AGSPRQSPVNSVATPPPSAASAAAGNPAQSQLHMHLTRSSPKASSHSHVLAKSLMAEPRMTPPEQMKR  
SDIIQNYLKRENSTAASSTNGVGNRSPSSSSTPPPSAVQNQQRWGSSSVITTTTCQQRQQSVSPHNSGSS  
SSSSSSSSSSSSSSSTSSNCSSSSASSCQYFQSPHSTSNGTSAFSSSSSGSNSATPLLELQVDIADSAQP  
LNLKSKSPTPPPSKLHALVAAAANAVQRYPTLSADVTVTASNGGSSVGGGESGRQQQSAGECGLPQSGPER  
RRAQGNAGGVRAGGRWFYAERKWERQLGVAVQRSRKQDHLERRELN

>Q9I8F6\_SALSA

MDNKMNSFDMKTLSTLDCPYLPSLEYSHNSPHHHHS PDRSHSCNHSPDRSHSFNHSPDRSHSFNHSPDRN  
HSFNHSPDRSHSFNHSPDRSHSYNDTYSVYQGSVNDKPLSPSQSSDCSIVLSLRPRPHSNPPTYTDASSL  
LNIDCRVCGDKASGFHYGVHVCEGCKGFFRRTVRLKLEYDHCIDLHCRIHKKSRNKCQYCRFQKCLLVGMS  
HDAIRFGRMPQVEREKLLQAEFMDVEPRNPESADLRALSRLCLSYHRHFPLTKSKAKAILSGKTHGNSP  
FVIHDMKSLTAGQYFINCRQLPVLERQRSVLPPEEPAEELELSVFRRIQFRSAEAVQEVTEFTKSI PGFT  
ELDMNDQVILLKYGVIEVMTTMLAPLMNKDGTLFAYGQIFMTREFLKSRLKPFCEMMEPKFEFAAKFNLL  
ELDDSDMALFFAVIILSGDRPGLVNVKPIEDLQETVLQALELQKTIHPDCPQLFAKLLQKMTDLRQLGG  
QPRSAHIHLLKKQELQMCLHPLLQEI MRDLY

>ECR\_MANSE

MRRRWSNNGCFPLRMFEESSEVTSSSAFGMPAAMVMSPELASPEYGGLELWSYDETMNTNYPAQSL LGA  
CNAPQQQQQQQQQPSAQPLPSMPLPMPPTTKSENESSSGREELSPASSINGCSTGDGEPRRQKKGPA  
RQQEELCLVCGDRASGYHYNALTCEGCKGFFRRSVTKNAVYICKFGHACEMDMYMRRKCQECRLKCLAV  
GMRPECVPESTCKNKRREKEAQREKDKLPVSTTTVDDHMPAIMQCDPPPEAARIHEVVPRFLTEKLME  
QNRLKNVTPLSANQKSLIARLVWYQEGYEQPSEEDLKRVTQTWQLEEEEEEEETDMPFRQITEMTILTVQL  
IVEFAKGLPGFSKISQSDQITLLKASSSEVMMLRVARRYDAATDSVLFANNQAYTRDNYRKAGMSYVIED  
LLHFCRCMYSMSMDNVHYALLTAIVIFSDRPGLEQPLLVEEIQRYYLKTLRVYILNQHSASPRCAVLF GK  
ILGVLTELRTLGTQNSNMCI SLKLNKRLPPFLEEIWDVAEVSTTQPTPGVAAQVTPIVDNPAAL

>RORA\_MOUSE

MESAPAAPDPAASEPGSSGSEAAAGSRETPLTQDTGRKSEAPGAGRRQSYASSSRGIVTKKTHTSQIEI  
 IPCKICGDKSSGIHYGVITCEGCKGFFRRSQSNATYSCPRQKNCLIDRTSRNRCQHCRLOKCLAVGMSR  
 DAVKFGRMSKKQRDSLYAEVQKHRMQQQQRDHQQQPGEAELTPTYNISANGLTELHDDLSTYMDGHTPE  
 GSKADSAVSSFYLDIQSPDQSGLDINGIKPEPICDYTPASGFFPYCSFTNGETSPTVSMAELEHLAQNI  
 SKSHLETCQYLREELQQITWQTFLQEEIENYQNKQREVMWQLCAIKITEAIQYVVEFAKRIDGFMELCQN  
 DQIVLLKAGSLEVVFIRMCRAFDSQNNNTVYFDGKYASPDVFKSLGCEDFISFVFEFGKSLCSMHLTEDEI  
 ALFSAFVLMASDRSWLQEKVKIEKLOQKIQLALQHVLOKNHREDGILTKLICKVSTLRALCGRHTEKLMA  
 FKAIYPDIVRLHFPPPLYKELFTSEFEPAMQIDG

>Q6GMA2\_XENLA

MSATAVDGSDVSLDGDSEFHSVGTVLQDSAGSVKLQIKEERLESQESASLPNENEVLGTDGEGSSQSAEE  
 PERKRKKGPAKMLGNEVCSVCGDKASGFHYNVLSCEGCKGFFRRSVIKNAQYSCKNNGKCQMDMYMRRK  
 CQECRLRKC REAGMREQCVLSEEQIRSKKIRKQODEVTRSSALVPPSPCMLSQEVVQLTPQQEKMIEQ  
 LVSAQQQCNKRSFSDQPKVTPWPPGTDPNREARQQRFHFTELAIISVQEIIVDFAKQVPGFLELSREDQ  
 IALLKASTIEIMLLETARRYNHETECITFLKDFYTSKDDFHRAGLQVEFINPIFEFSRGMQMQLDDAEY  
 ALLIAINIFSA DRPNVLNHQHVENLQLPYVEALHSYTRIKRPQDHLMFPRMLMKLVSLRTLSSVHSEQFF  
 ALRLQDKKLPPLLSEIWDVHE

>O77255\_CHOFU

MRRRWSNNGGFQTLRMLLEESSSEVTSSSALGLPAMVMSPELASPEYGGLELWGYDDGLSYNTAQSLLG  
 NTCTMQQQQQTQPLPSMPLPMPPTTPKSENESSISGREELSPASSINGCSTDGEARRQKKGPA PRQQEEL  
 CLVCGDRASGYHYNALTCGCKGFFRRSVTKNAVYICKFGHACEMDMYMRKQCQECRLKCLAVGMRPEC  
 VVPETQCAMKRKEKKAQKEKDKLPVSTTTVDDHMPPIMQCEPPPEAARIHEVVPRFLSDKLELNRQKN  
 IPQLTANQQFLIARLIWYQDGYEQPSDEDLKRITQTWQQADDENEESDTPFRQITEMTILTVQLIVEFAK  
 GLPGFAKISQPDQITLLKACSSEVMMLRVARRYDAASDVLFANNQAYTRDNYRKAGMAYVIEDLLHFRCR  
 CMYSMALDNIHYALLTAVVIFSDRPGLEQPQLVEEIQRYYLNTLRVYILNQLSGSARSSVIYGKILSILS  
 ELRTLGMQNSNMCISLKLKNRKLPPFLEEIWDVADMSHTQPPPILESPTNL

>Q6RVD3\_PLOIN

MRRRWSNNGGFQTLRMLLEESSSEVTSSSALGLPPAMVMSPELASPEYGGLELWSYDDGISYNTATAQLL  
 GNACTMQQQQPPTQPLPSMPLPMPPTTPKSENESSSISGREELSPASSVNGCSTDGDARRQKKGPA PRQQE  
 ELCLVCGDRASGYHYNALTCGCKGFFRRSVTKNAVYIYKFGHACEMDMYMRKQCQECRLKCLAVGMRP  
 ECVVPETQCAIKRKEKKAQREKDKLPVSTTTVDDHMPPIMQCDPPPEAARIHEVVPRFLSDKLELNRQKN  
 KNIPPLTANQQFLIAGLVWYQDGYEQPSEEDLKRVTQTWQPTDEDDDDMPFRQITEMTILTVQLIVEFAK  
 GLPGFSKISQPDQITLLKACSSEVMMLRVARRYDAATDVLFANNQAYTRDNYRKAGMAYVIEDLLHFRCR  
 CMYSMTMDNVHYALLTAIVIFSDRPGLEQPQLVEEIQRYYLNTLRVYIMNQHS DSPRCAVVF GKILSVLT  
 EIRTLGMQNSNMCISLKLKNRKLPPFLEEIWDVADVSTAQQQLPLVDAGSAL

>Q8JHU1\_CHICK

MGPTQLSTQDHGKRVASVFEMEEGLSLFSGSENPPKHAENPPLKRKKGPAKMLGNEVCSVCGDKASGF  
 HYNVLSCEGCKGFFRRSVIKGAQYVCKNGGKCEMDMYMRKQCQECRLRKCQEAGMREQYVLSSEEQIRLKK  
 LKKQEDDQARTVVVRPNPPQPPSPSHQLTPEQLNMIKLVAAQQQCNQRSFTDRLKVTWPVQVDPNNRE

ARQQRFAHFTELAIISVQEIIVDFAKQLPGFRELTRDQIALLKTSTIEVMLLETSTRYNPEIESITFLKD  
 LSYNRDDFAKAGLQFEFINPIFEFSKGMNELQLNDAEYALLIAINIFSADRPNVQDQSLVERLQHTYVEA  
 LHSYICINRPNHLMFPRMLMKLVSLRRTLSSVHSEQVFALRLQDKKLPPLLSEIWDVHE

>Q5RGZ2\_BRARE

MVDMPSLYSPSSPLGDPIMYSPLSGELIGDMQVLEDISQSLSDDTFNFSHMLDYQNCDTAVDNSSILDVL  
 TPASSPSSEVFSASTGQDENS SSGSLTLECRVCADRASGFHYGVHACEGCKGFFRRTIRLKLEYDKCERN  
 KIQKKNRNCQYCRFRKCLAVGMSHNAIRFGRIPOQSEKQRLKAEQDVSGKEEHKCQQPDMRSLARQMHEA  
 YLKHFFHMNKAKARVFLTGKTSTPPFVIHDMDTLQHAEEKLVTLQLLGNVASGDISTLQEREVEARLFLFCQ  
 YASVATVTELTEYAKAVPGFADLDLNDQVTLTKYGVYEALFTLLASCMNKDGLLVAQGGGFI TREFLKSL  
 RKPFSDMMEPKFQFAMKFNALELDDSDLALFVAAIICGDRPGLSNVPQIERIQESVIHSLRLHLTSNHP  
 DNSLLFPKLLQKLADLRQLVTEHAELVQEINKTEDASLHPLLQEIYRDMY

>O77240\_CHOFU

MDLKHEVAYRGVLPQVKAEPGVHNGQVNGHVRDWMAGGAGANSPSPGAVAQPQPNNGYSSPLSSGSYGP  
 YSPNGKIGREELS PASSINGCSTDGEARRQKKGPAPRQQEELCLVCGDRASGYHYNALTCEGCKGFFRRS  
 VTKNAVYICKFGHACEMDMYMRKQCQECRLKCLAVGMRPECVVETQCAMKRKEKKAQEKDKLPVSTT  
 TVDDHMPPIMQCEPPPEAARIHEVVPRFLSDKLEETNRQKNIPQLTANQQFLIARLIWYQDGYEQPSDE  
 DLKRITQTWQQADDENEESDTPFRQITEMTILTVQLIVEFAKGLPGFAKISQPDQITLLKACSSEVMMLR  
 VARRYDAASDVSFLFANNQAYTRDNRYRKAGMAYVIEDLLHFCRCMYSMALDNIHYALLTAVVIFSDRPGLE  
 QPQLVEEIQRYYLNTLRITYILNQLSGSARSSVIYGKILSILSELRTLGMQNSNMCISLKLNRKLPPFLE  
 EIWDVADMSHTQPPPILESPTNL

>Q8JIT8\_SALSA

MKSHDEEVVQEQEQEQEKGNNSHSTSNTDSPALSSSCTDLSQTSSPSLSDQLLLGREDVTGAGINVEC  
 RICGDKASGFHYGVHACEGCKGFFRRTIRMKLEYERCERSCKIQKKS RNKCQYCRFQKCLLLGMSHDAIR  
 YGRMPEAEKRKLVAGLLAGERAPTTPNGSDLKSLAKEVNNAYLKNLNMTKKARSILTGTSSSPVEYYP  
 YPFVIHDMDSLCAENGLVWKQLINGTTPNKEIGVHVYRCQCTTVETVRELTEFAKSI PGFVDFLNDQ  
 VTLLKYGVHEAIFAMLP SLMNKDGLLVANGKGFVTREFLRSLRRPFSEIMEPKFEFAVKFNALELDDSDL  
 ALFVAAIICGDRPGLINIKQVEEIQDSILQALDQHLLANHTDSKYLFPKLLNKMADLRQLVTENAMLVQ  
 KIKKTESETSLHPLLQEIYKDMY

>Q8AXU8\_CHICK

MGPTQLSTQDHGKRVASVFEMEEGLSLFSGSENPPKHAENPPLKRKKGPAKMLGNEVCSVCGDKASGF  
 HYNVLSCEGCKGFFRRSVIKGAQYVCKNGGKCEMDMYMRKQCQECRLRKCQEAGMREQYVLSSEEQIRLKK  
 LKKQEDDQARTVVVRPNPPQPPSPSHQLTPEQLNMIKLVAAQQCNQRSFTDRLKVTWPVQVPDPNNRE  
 ARQQRFAHFTELAIISVQEIIVDFAKQLPGFRELTRDQIALLKTSTIEVMLLETSTRYNPEIESITFLKD  
 LSYNRDDFAKAGLQFEFINPIFEFSKGMNELQLNDAEYALLIAINIFSADRPSVQDQSLVERLQHTYVEA  
 LHSYICINGPNHLMFPRMLMKLGLSLRRTLSSVHSEQVFALRLQDKKLPPLLSEIWDVHE

>O44337\_9ACAR

MLSELQLQPLGRRSAAAAPSDEVASMKPMLLQAAQGGAGGLAAGSPPALSPNLPSVVKVEPRLPSPCVG  
 GAASGDGGPVPKRVRQDDAGAWISSPSSQMSVGLSPPPPLLNGVANSSGLSPVSNCSYDITYSPRGPC  
 KEEMSPSSGGGLNGYFVDSFGDPKPKKKGPAQRQQEELCLVCGDRASGYHYNALTCEGCKGFFRRSITKN



AVYQCKYGNNCIDIMYMRRKCQECRLKKCLSVGMRPECVVEYQCAIKRESKKHQKDRPNSTTRESPSAL  
 MAPSSVGGVSPTSQPMGGGGSSLGSSNHEEDKKPVVLSPGVKPLSSSQEDLINKLVYQQEFESPSEEDM  
 KKTTPFPLGDSEEDNQRRFQHITTEITILTVQLIVEFSKRVPGFDTLAREDQITLLKACSSSEVMMLRGARK  
 YDVKTDSIVFANNQPYTRDNYRSASVGDSDADALFRFCRKMQLRVDNAEYALLTAIVIFSERPSLVDPHK  
 VERIQEYYIETLRMYSENHRPPGKNYFARLLSILTELRLTGMNAEMCFSLKVQNKKLPPFLAEIWDIQE

>Q68CY8\_HUMAN

MSSPTTSSLDTPLPGNGPPQPGAPSSSPTVKEEGPEPWGGPDPDVPGTDEASSACTTDWVIPDPEEEPE  
 RKRKKGPAKMLGHELRCRVCGDKASGFHYNVLSCEGCKGFFRRSVVRRGGARRYACRGGGTCQMDAFMRRK  
 CQQCRLRKCKEAGMREQCVLSEEQIRKKKIRKQQQESQSQSPVGPQGSSSSASGPGASPGGSEAGSQ  
 GSGEGEVQLTAAQELMIQQLVAAQLQCNRKFSQPKVTPWPLGADPQSRDARQQRFAHFTELAIIISVQ  
 EIVDFAKQVPGFLQLGREDQIALLKASTIEIMLLETARRYNHETECITFLKDFITYSKDDFHRAGLQVEFI  
 NPIFEFSRAMRRLGLDDAEYALLIAINIFSAADRPTCRAGPRGGVAAALRGGAAVLHAHQEAADQLRFPRM  
 LMKLVSLRTLSSVHSEQVFALRLQDKKLPPLLSEIWDVHE

>Q5XI75\_RAT

MVMQFQGLENIQISLQSHRSLSGFASDRMSSKPAKGVLTEHAAGPLGQNLDESYSYPYNNVQFPQVQPQ  
 ISSSSYYSNLGFYPQQPEDWYSPGLYELRRMPTESVYQGETEVSEMPVTKKPRMAASSAGRIKGDLECVV  
 CGDRASGYHYNALTCEGCKGFFRRSITKNNAVYCKKNGGNCVMDMYMRRKCQDCRLRKCREMGMLAECLLT  
 EIQCCKSKRLRKNVKQHADQTVNEDSEGRDLRQVTSTTKLCREKTELTVDQQTLLDYIMDSYSKQRMPEI  
 TNKILKEEFSAEENFLILTEMATSHVQILVEFTKRLPGFQTLDHEDQIALLKGSVEAMFLRSAEIFNKK  
 LPAGHADLLEERIRKSGISDEYITPMFSFYKSVGELKMTQEEYALLTAIVILSPDRQYIKDREAVEKLQE  
 PLLDVLQKLCKIYQPENPQHFACLLGRLELRTFNHHHAEMLSWRVNDHKFTPLLCEIWDVQ

>NR1H4\_RAT

MNLIGPSHLQATDEFALSENLFGVLTEHAAGPLGQNLDESYSYPYNNVQFPQVQPQISSSSYYSNLGFYP  
 QQPEDWYSPGLYELRRMPTESVYQGETEVSEMPVTKKPRMAASSAGRIKGDLECVVCGDRASGYHYNALT  
 CEGCKGFFRRSITKNNAVYCKKNGGNCVMDMYMRRKCQDCRLRKCREMGMLAECLLTHEIQCKSKRLRKNVK  
 QHADQTVNEDSEGRDLRQVTSTTKLCREKTELTVDQQTLLDYIMDSYSKQRMPEITNKILKEEFSAEEN  
 FLILTEMATSHVQILVEFTKRLPGFQTLDHEDQIALLKGSVEAMFLRSAEIFNKKLPAGHADLLEERIR  
 KSGISDEYITPMFSFYKSVGELKMTQEEYALLTAIVILSPDRQYIKDREAVEKLQEPLLDVLQKLCKIYQ  
 PENPQHFACLLGRLELRTFNHHHAEMLSWRVNDHKFTPLLCEIWDVQ

>ECR\_HELVI

MSLGARGYRRCDTLADMRRRWYNNNGPFQTLRMLEESSSEVTSSSALGLPPAMVMSPELASPEIGGLELW  
 GYDDGITYSMAQSLGTCTMEQQQPQPQQPQQTQPLPSMPLPMPPTTPKSENESSMSSGREELSPASSVNG  
 CSTDGEARRQKKGPAQRQEEELCLVCGDRASGYHYNALTCEGCKGFFRRSVTKNAVYICKFGHACEMDIY  
 MRRKCQECRLKKCLAVGMRPECVVPENQCAMKRKEKKAQREKDKLPVSTTTVDDHMPPIMQCDPPPPEAA  
 RILECVQHEVVPRFLNEKLMEQNRLKNVPPLTANQKSLIARLVWYQEGYEQPSEEDLKRVTQSDEDDEDS  
 DMPFRQITEMTILTVQLIVEFAKGLPGFAKISQSDQITLLKACSSSEVMMLRVARRYDAATDSVLFANNQA  
 YTRDNYRKAGMAYVIEDLLHFCRCMYSMMMDNVHYALLTAIVIFSDRPGLEQPLLVEEQRYLNTLRVY  
 ILNQNSASPRGAVIFGEILGILTEIRTLGMQNSMCIISLKLKNRKLPPFLEEIWDVADVATTATPVAAEA  
 PAPLAPAPPARPPATV

>O44336\_9ACAR

MNYHPGYEDVPPPYTAAAPEDFWRKEEMSPSSGGGGLNGYFVDSFGDPKKGKGPAPRQQEELCLVCGDRA  
SGYHYNALTCEGCKGFFRRSITKNAVYQCKYGNDCIDMYMRRKCQECRLKKCLSVGMRPECVVPEYQCA  
IKRESKHKQKDRPNSTTRESPSALMAPSSVGGVSPTSQPMGGGSSSLGSSNHEEDKPKVVLSPGVKPLSS  
SQEDLINKLVYYQQEFESPEEDMKKTTFFPLGDSEEDNQRRFQHITEITILTVQLIVEFSKRVPGFDTL  
AREDQITLLKACSSEVMMLRGARKYDVKTDSIVFANNQPYTRDNYRSASVGDSDALFRFCRKMQLRVD  
NAEYALLTAIVIFSERPSLVDPHKVERIQEYIETLRMYSENHRPPGKNYFARLLSILTELRTLGNMNAE  
MCFSLKVQNKKLPPFLAEIWDIQE

>O02035\_TENMO

MKRWSGLQAVRVTPEESSEVTSSSTTLVMSPANLASTDIGVDLEFWDLDLNGAKSRQRTHYHSKRI  
WIPGHTIIASNHHLAKSDTSSMSGREDLSPSSLNGYSADSCDSKKGKGTTPRQQEELCLVCGDRASGYHY  
NALTCEGCKGFFRRSITKNAVYQCKYGNCEIDMYMRRKCQECRLKKCLSVGMRPECVVPEVQCAVKRKE  
KKAQKEKDKPNSTNGSPDVIKIEPELSDSEKTLTNGNRISPEQEELILIHRLVYFQNEYEHPSEEDVK  
RIINQPIDGEDQCEIRFRHTTEITILTVQLIVEFAKRLPGFDKLLQEDQIALLKACSSEVMFMARRYD  
VQSDSILFVNNQPYPRDSYNLAGMGETIEDLLHF CRTMYSMKVDNAEYALLTAIVIFSERPSLIEGWKVE  
KIQEIYLEALRAYVDNRSPSRGTIFAKLLSVLTELRTLGNQNSEMCISLKLKNKKLPPFLDEIWDVDLK  
A

>Q8K476\_MESAU

MNLIHSHLQAMDEFSLSENVFGVLTEQEAGALGQNLDEAYSPYSNVQFPQVQPQISSSSYSNLGFYP  
QQPEEWYSPGIYELRRMPAETVYQGETEVSEMPVTKKPRMATAAAGRIKGDDELVCVCGDRASGYHYNALT  
CEGCKGFFRRSITKNAVYKCKNGGSCVMDMYMRRKCQECRLRKCKEMGMLAECLLTEIQCKSKRLRKNVK  
QHADKTVNEDREGRDLRQVTSTTKSREKTELTPDQQNLLDYITDSYSKQRMPOEITNKILKEEFSAEEN  
FLILTEMATSHVQVLVEFTKKLPGFQTLDHEDQIALLKGSVEAMFLRSAEIFNKKLPAGHADLLEERIR  
NSGISAEYITPMFSFYKSIGELKMTQEEYALLTGIVILSPDRQYIKDREAVERLQEPLEVLQKLCKIYQ  
PENPQHFACLLGRLTELRTFNHHHAEMLSWRVNDHKFTPLLCEIWDVQ

>Q8K473\_MESAU

MVMQRQGLNPVQVSLHSHRSLSGFVPDVMSLPAKGVLTEQEAGALGQNLDEAYSPYSNVQFPQVQPQ  
ISSSSYSNLGFYPQQPEEWYSPGIYELRRMPAETVYQGETEVSEMPVTKKPRMATAAAGRIKGDDELVCV  
CGDRASGYHYNALTCEGCKGFFRRSITKNAVYKCKNGGSCVMDMYMRRKCQECRLRKCKEMGMLAECMYT  
GLLTEIQCKSKRLRKNVKQHADKTVNEDREGRDLRQVTSTTKSREKTELTPDQQNLLDYITDSYSKQRM  
POEITNKILKEEFSAEENFLILTEMATSHVQVLVEFTKKLPGFQTLDHEDQIALLKGSVEAMFLRSAEIF  
FNKKLPAGHADLLEERIRNSGISAEYITPMFSFYKSIGELKMTQEEYALLTGIVILSPDRQYIKDREAVE  
RLQEPLEVLQKLCKIYQPENPQHFACLLGRLTELRTFNHHHAEMLSWRVNDHKFTPLLCEIWDVQ

>Q8K474\_MESAU

MVMQRQGLNPVQVSLHSHRSLSGFVPDVMSLPAKGVLTEQEAGALGQNLDEAYSPYSNVQFPQVQPQ  
ISSSSYSNLGFYPQQPEEWYSPGIYELRRMPAETVYQGETEVSEMPVTKKPRMATAAAGRIKGDDELVCV  
CGDRASGYHYNALTCEGCKGFFRRSITKNAVYKCKNGGSCVMDMYMRRKCQECRLRKCKEMGMLAECLLT  
EIQCKSKRLRKNVKQHADKTVNEDREGRDLRQVTSTTKSREKTELTPDQQNLLDYITDSYSKQRMPOEI  
TNKILKEEFSAEENFLILTEMATSHVQVLVEFTKKLPGFQTLDHEDQIALLKGSVEAMFLRSAEIFNKK  
LPAGHADLLEERIRNSGISAEYITPMFSFYKSIGELKMTQEEYALLTGIVILSPDRQYIKDREAVERLQE

PLLEVLQKLCKIYQPENPQHFACLLGRLTELRTFNHHHAEMLSWRVNDHKFTPLLCEIWDVQ

>Q8K475\_MESAU

MNLIESHSLQAMDEFSLSENVFVLTQEAGALGQNLDLEAYSPYSNVQFPQVQPQISSSSYSNLGFYP  
 QQPEEWYSPGIYELRRMPAETVYQGETEVSEMPVTKKPRMATAAAGRIKGDDELVCVCGDRASGYHYNALT  
 CEGCKGFFRRSITKNAVYKCKNGGSCVMDMYMRRKCQECRLRKCKEMGMLAECMYTGLLTEIQCKSKRLR  
 KNVKQHADKTVNEDREGRDLRQVTSTTKSCREKTELTPDQQNLLDYITDSYSKQRMPEITNKILKEEFS  
 AEENFLILTEMATSHVQVLVEFTKKLPGFQTLDHEDQIALLKGSVAEAMFLRSAEIFNKKLPAGHADLLE  
 ERIRNSGISAEYITPMFSFYKSIGELKMTQEEYALLTGIVILSPDRQYIKDREAVERLQEPLEVLQKLC  
 KIYQPENPQHFACLLGRLTELRTFNHHHAEMLSWRVNDHKFTPLLCEIWDVQ

>HR3\_GALME

MNNSQFHELFGSQWPPDQHGGHSSASTMLHQAQSPLPQGMRLKREPHTDVQGMHNQMGMDITSGSVADS  
 TSPPPGSSSEGMFGSSISGMFMDKKAANSIRAQIEIIPCKVCGDKSSGVHYGVITCEGCKGFFRRSQSTVV  
 NYQCPRNKACVVDNRNRNCQYCRLOKCLKLGMSRDAVKFGRMSKKQREKVEDEVRYHRAQMRAQTDAAP  
 DSVYDAQQQTSSSDQFHGHYNGYPGYRSPSSYGYGNAGPALTSNMNIQPQAPQQQPYDVSADYVDST  
 TAYEPKQTGGFLDADFIGHAEGDISKVLVKSLAEAHANTNPKLEYVHEMFRKPPDVSKLLFYNSMTYEEM  
 WLDCADKLTGMIQNIIEFAKLIPGFMKLSQDDQILLKSGSFELAIVRLSRLIDVNRQVLYGDVVLPIR  
 ECVHARDPRDVTLVVGI F DAAKTIERLKL TETELALYQSLVLLWPERHGVRGNPEIQCLFNMSMAAMRHE  
 IESNHAPLKG DVTVLDTLLAKIPTFRELSLMHLEALCRFKAAPHHVFPALYKELFSLDSVLDYTHG

>ECR\_CHITE

MKTENLIVTTVKVEPLNYASQSFQDNNIYGATKKQRLESDEWMNHNQTNMNLESSNMNHNTISGFSSPD  
 VNYEAYSPNSKLDGDNMSVHMGDGLDGKSSSKKGPVPRQQEELCLVCGDRASGYHYNALTCEGCKGFFR  
 RSVTKNAVYCKCFGHECEMDMYMRRKCQECRLKCLAVGMRPECVVPENQCAIKRKEKKAQKEKDKVPGI  
 VGSNTSSSSLLNQSLNNGSLKNLEISYREELLEQLMKCDPPHPMQQLPEKLLMENRAKGPQLTANQV  
 AVIYKLIWYQDGYEQPSEEDLKRIITTELEEEEDQEHEANFRYITEVTILTVQLIVEFAKGLPAFIKIPQE  
 DQITLLKACSSEVMMLRMARRYDHSDSILFANNTAYTKQTYQLAGMEETIDDLLHFCRQMYALSIDNVE  
 YALLTAIVIFSDRPGLEKAEMVDIIQSYTETLKVYIVNRHGGESRCSVQFAKLLGILTELRTMGKNKSE  
 MCFSLKLRNRKLPRLFEEVWDVGDVNNQTTATTNTENIVRERINRN

>Q9BMC6\_HELAM

MNNNQFHDLFGSQWPPDQHGGHSSASTMLHQSQGLPQGMQLKREPHTDVQPVMHNQMGTDITSGSVADST  
 SPPPGSSDGMFGSSISGMFMDKKAANSIRAQIEIIPCKVCGDKSSGVHYGVITCEGCKGFFRRSQSTVVN  
 YQCPRNKACVVDNRNRNCQYCRLOKCLKLGMSRDAVKFGRMSKKQREKVEDEVRFHRAQMRAQTDAPD  
 SVYDAQQQTSSSDQFHGHYNGYPGYRSPSSYGYNNAGPALQSNMGGIQPQAPQQQPYDVSADYVDSTT  
 AYEPKQTEGFLDPDFISHAEGDISKVLVKSLAEAHANTNPKLEFIHEMFRKPPQDVSKLLYSSMTYEEMW  
 LDCADKLTGMIQNIIEFAKLIPGFMKLTQDDQILLKSGSFELAIVRLSRLIDVNRDQVLYGDVAVLSIRE  
 CVHARDPRDVALVVGIFDAAKTIA RLKL TETELALYQSLVLLWPERHGVRGNPEIQCLFNMSMAAMRHEI  
 ETNHAPLKG DVTVLDTLLAKIPTFRELSLMHLEALCRFKAAPHHVFPALYKELFSLDSVLDYTHG

>E75\_GALME

MTLVMSPDSSYGRYDAPAPADNRIMSPVHKEREPELHIEFDGTTVLCRVCGDKASGFHYGVHSCEGCKGF  
 FRRSIQQKIYRPTKNOQCSILRINRNRNCQYCRLLKCI AVGMSRDAVRFGRVPKREKARILAAMQSSTT

RAHEQAAAAELDDGPRLLARVVRAHLDTCEFTTRDRVAAMRNGARDCPTYSQPTLACPLNPAPQLQSEKEF  
 SQRFAHVIRGVIDFAGLIPGFQLLTQDDKFTLLKSGLFDALFVRLICMFDAPLNSIICLNGQLMKRDSIQ  
 SGANARFLVDSTFKFAERMNSMNLDAEIGLFCIVLITPDRPGLRNVELVERMHRSRLKSLQTVIAQNR  
 SDGPGFLRELMDTLPDLRTLSTLHTEKLVVFRTEHKELLRQMQMWEDEGALWADSGADDSARSPIGVS  
 SESSETTGDCGTPLLAATLAGRRRLDSRGSVDEEALGVAHLAHNGLTVTVPVRPPPRYRKLDSPTDSGIES  
 GNEKHERIVGPESGCSSPRSSLEEHSDDRRPIAPADDMVLRVLAQAPPLYDASSLMDEAYKPHKKFRAM  
 RRDTWSEAEARPGRPTPSPQPPHHPASPAPAHSPRPPIRAPLSSTHSVLAKSLMEGPRMTPPEQLKRTD  
 IIQQYMRGETGAPTEGCPLRAGLLTFCRGASPAPQPVIALQVDVAETDAPQPLNLSKKSPPSPSPPPPP  
 PRSYMPMPLPA

>Q7Z2W0\_HUMAN

MVMQFQGLNPIQISPHCSCTPSGFFMEMMSMKPAKGVLTEQVAGPLGQNLEVEPYSQYSNVQFPQAQFPQ  
 ISSSSYYNLSGFYPPQPEEWYSPGIYELRRMPAETLYQGETEVAEMPVTKKPRMGASAGRIKGDDELVCVVC  
 GDRASGYHYNALTCGCKGFFRRSITKNAVYKCKNGGNCVMDMYMRRKCQECRLRKCKEMGMLAECLLTE  
 IQCKSKRLRKNVKQHADQTVNEDSEGRDLRQVSTSTKSCREKTELTPDQQTLLHFIMDSYNKQRMPEIT  
 NKILKEEFSAEENFLILTEMATNHVQVLVEFTKKLPGFQTLDHEDQIALLKGSVEAMFLRSAEIFNKKL  
 PSGHSDLLEERIRNSGISDEYITPMFSFYKSIGELKMTQEEYALLTAIVILSPDRQYIKDREAVEKLEP  
 LLDVQLKCKIHQPENPQHFACLLGRLELRTFNHHHAEMLSWRVNDHKFTPLLCEIWDVQ

>NR1H4\_HUMAN

MVMQFQGLNPIQISPHCSCTPSGFFMEMMSMKPAKGVLTEQVAGPLGQNLEVEPYSQYSNVQFPQVQFPQ  
 ISSSSYYNLSGFYPPQPEEWYSPGIYELRRMPAETLYQGETEVAEMPVTKKPRMGASAGRIKGDDELVCVVC  
 GDRASGYHYNALTCGCKGFFRRSITKNAVYKCKNGGNCVMDMYMRRKCQECRLRKCKEMGMLAECLLTE  
 LLTEIQCKSKRLRKNVKQHADQTVNEDSEGRDLRQVSTSTKSCREKTELTPDQQTLLHFIMDSYNKQRMPE  
 QEITNKILKEEFSAEENFLILTEMATNHVQVLVEFTKKLPGFQTLDHEDQIALLKGSVEAMFLRSAEIFNKKL  
 NKKLPSGHSDLLEERIRNSGISDEYITPMFSFYKSIGELKMTQEEYALLTAIVILSPDRQYIKDREAVEK  
 LQEPDLLVQLKCKIHQPENPQHFACLLGRLELRTFNHHHAEMLSWRVNDHKFTPLLCEIWDVQ

>Q8SPF5\_RABIT

MVMQFQGLNPNVHISPHHSCSPPGFVTDMMMSMKPAKGVLTEQVTSPLGQNLEVEPYSQYNNVQFPQVQFPQ  
 ISSSSYYNLSGFYPPQPEEWYSPGIYELRRTPADTLYQGETEVADMPVPPKPRMGASAGRIKGDDELVCVVC  
 GDRASGYHYNALTCGCKGFFRRSITKNAVYKCKNGGNCVMDMYMRRKCQECRLRKCKEMGMLAECLLTE  
 IQCKSKRLRKNVKQHTDQTTNDDSEGPDLRQVSTSTKSCREKTELTPDQQNLLHYITDSYNKQRMPEV  
 NKILKEEFSAEENFLILTEMATSHVQVLVEFTKKLPGFQTLDHEDQIALLKGSVEAMFLRSAEIFNKKL  
 PVGHTDLLEERIRKSGISDEYITPMFSFYKSVGELKMTQEEYALLTAIVILSPDRQYIKDREAVEKLEP  
 LLDVQLKCKIHQPENPQHFACLLGRLELRTFNHHHAEMLSWRVNDHKFTPLLCEIWDVQ

>VDR\_CHICK

MSELRGSWDEQQQSMAYLPDADMDTVAASTSLPDPAGDFDRNVPRICGVCGRATGFHFNAMTCGCKGF  
 FRRSMKRKAMFTCPFNGDCKITKDNRRHCQACRLKRCVDIGMMKEFILTDEEVQRKREMI LKRKEEEALK  
 ESLKPKLSEEQQKVIDTLLEAHHKTFDTTYSDFNKFRPPVRSKFSRSMATHSSSVVSQDFSSSDSNDVFG  
 SDAFAAFPEPEPQMFSNLDLSEESDESPSMNIELPHLPLMLPHLADLVSYSIQKVIGFAKMI PGFRDLTA  
 EDQIALLKSSAIEVIMLRNSQSFTMEDMSWTGCSNDFKYKVSVDVTQAGHSMDLLEPLVKFQVGLKKNLNH  
 EEEHVLLMAICILSPDRPGVQDTSLVESIQRDLSDILQTYIRCRHPPPGSRLLYAKMIQKLADLRSLNEE

HSKQYRCLSFQPEHSMQLTPLVLEVFNGNEIS

>Q8WSA2\_BOMMO

MSPDSSYGRYDVPTSVDHSLMSSMHKEREPELHIEFDGTTVLCRVCGDKASGFHYGVHSCEGCKGFFRRS  
 IQQKIQYRPCTKNQQCSILRINRNRCQYCRLLKCIAVGMSRDAVRFGRVPKREKARILAAMQQSSSSRAH  
 EQAAAAELDDAPRLLARVVRAHLDTCEFTDRVASMRRARARDCPTYSQPTLACPLNPAPQLQSEKEFSQR  
 FAHVIRGVIDFAGLIPGFQLLTQDDKFTLLKSGLFDALFVRLICMFDAPLNSIIICLNGQLMKRDSIQSGA  
 NARFLVDSTFKFAERMNSMNLDAEIGLFCAIVLITPDRPGLRNIELVERMHSRLKACLQTVIAQNRPER  
 PGFLRELMDTLPDLRRTLSTLHTEKLVVFRTEHKELLRQQMWNEEEGVSWADSVVEESARSPIGSVSSSES  
 GEVPSDCGTPLLAATLAGRRRLDSRGSVDEEALGVAHLAHNGLTVTPVRPPRYRKLDSPTDSGIESGNE  
 KHERIIGPGSGCSSPRSSLEEHTEDRRPTAPADMPVLKRVLQAPPLYGGTSTLMDETYKPHKKFRAMRR  
 DTGEAEARPVQPTPSPQPLHPPASPAHPAHSRPPRISLSSTHSLVAKSLMEGPRMTPEQLKRTDMIQQ  
 YMRNEAGSSVEGCTLRGTGGLLTCYRGASPAPPVLAQVDVTDAPLNLKSKSPSPPRSYPQMLEA

>Q9U5G4\_BOMMO

MSPDSSYGRYDVPTSVDHSLMSSMHKEREPELHIEFDGTTVLCRVCGDKASGFHYGVHSCEGCKGFFRRS  
 IQQKIQYRPCTKNQQCSILRINRNRCQYCRLLKCIAVGMSRDAVRFGRVPKREKARILAAMQQSSSSRAH  
 EQAAAAELDDAPRLLARVVRAHLDTCEFTDRVASMRRARARDCPTYSQPTLACPLNPAPQLQSEKEFSQR  
 FAHVIRGVIDFAGLIPGFQLLTQDDKFTLLKSGLFDALFVRLICMFDAPLNSIIICLNGQLMKRDSIQSGA  
 NARFLVDSTFKFAERMNSMNLDAEIGLFCAIVLITPDRPGLRNIELVERMHSRLKACLQAVIAQNRPER  
 PGFLRELMDTLPDLRRTLSTLHTEKLVVFRTEHKELLRQQMWNEEEGVSWADSVVEESARSPSGSVSSSES  
 GEVPSDCGTPLLAATLAGRRRLDSRGSVDEEALGVAHLAHNGLTVTPVRPPRYRKLDSPTDSGIESGNE  
 KHERIIGPGSGCSSPRSSLEEHTEDRRPTAPADMPVLKRVLQAPPLYGGTSTLMDETYKPHKKFRAMRR  
 DTGEAEARPVQPTPSPQPLHPPASPAHPAHSRPPRISLSSTHSLVAKSLMEGPRMTPEQLKRTDMIQQ  
 YMRNEAGSSVEGCPLRGTGGLLTCYRGASPAPPVLAQVDVTDAPLNLKSKSPSPPRSYPQMLEA

>E75\_CHOFU

MTLVMSPDSSYGRYDAQPPVDGGMVNPVHREPELHIEFDGTTVLCRVCGDKASGFHYGVHSCEGCKGF  
 FRRSIQQKIQYRPCTKNQQCSILRINRNRCQYCRLLKCIAVGMSRDAVRFGRVPKREKARILAAMQQSSS  
 SRAHEQAAAAELDDAPRLLARVVRAHLDTCEFTDRVAAAMRRARARDCPTYSQPTLACPLNPAPQLQSEKE  
 FSQRFQFAHVIRGVIDFAGLIPGFQLLTQDDKFTLLKSGLFDALFVRLICMFDAPLNSIIICLNGQLMKRDSI  
 QSGANARFLVDSTFKFAERMNSMNLDAEIGLFCAIVLITPDRPGLRNIELVERMHARLKSCLQTVIAQN  
 RADRPGFLRELMDTLPDLRRTLSTLHTEKLVVFRTEHKELLRQQMWGDEEVCWADSGVDDARSPLGSVS  
 SSESGEAPSDCGTPLLAATLAGRRRLDSRGSVDEEALGVAHLAHNGLTVTPVRPPRYRKLDSPTDSGIE  
 SGNEKHERIVGPGSGCSSPRSSLEEHEMEDRRPLAADDMPVLKRVLQAPPLYDASSLMDEAYKPHKKFRAM  
 RRDTEAEARPMRPTPSPQPMHPPGSPAHPAHPAHSRPLRAPLSSTHSLVAKSLMEGPRMTPEQLKRT  
 DIIQQYMRRGEAGEECRAGLLLYRGASPLQVDVADAPQLNLKSKSPSPPRSFMPMLEA

>E75\_MANSE

MTLVMSPDSSYGRYDAPTPTDVTSPVHREPELHIEFDGTTVLCRVCGDKASGFHYGVHSCEGCKGFFR  
 RSIQQKIQYRPCTKNQQCSILRINRNRCQYCRLLKCIAVGMSRDAVRFGRVPKREKARILAAMQQSSSTR  
 AHEQAAAAELDDAPRLLARVVRAHLDTCEFTDRVAAAMRRARARDCPTYSQPTLACPLNPAPQLQSEKEFS  
 QRFAHVIRGVIDFAGLIPGFQLLTQDDKFTLLKSGLFDALFVRLICMFDAPLNSIIICLNGQLMKRDSIQS  
 GANARFLVDSTFKFAERMNSMNLDAEIGLFCAIVLITPDRPGLRNVELVERMHTRLKACLQTVIAQNRP

DRPGFLRELMDTLPDLRTLSTLHTEKLVVFRTEHKELLRQQMWSEEEAVSWVDSGADELARSPIGSVSS  
 ESGEAVGDCGTPLLAATLAGRRRLDSRGSVDEEALGVAHLAHNGLTVTPVRQPPRYRKLDSPTDSGIESG  
 NEKHERIVGTGSGCSSPRSSLEEHNEDRRPPVSADMPVLKRVLQAPPLYGGTPSLMDEAYRRHKKFRAL  
 RRDTGEAEARTVRPTSPSPQPHHPANPAHPAHSRPRQRASLSSTHSVLAKSLMEGPRMTPPEQLKRTDII  
 QQYMRRGESSAPAEGCPLRAGGLLTCYRGASPAPQPVLLALQVDVTDAPLNLSKKSPPRTYMPQMLEA

>Q8JHU2\_CHICK

MGSEMNLIGHPQLATADGFSLAEGPHLFGILSEPMSSPVQEADVSPYTQYNSVFPFQVQPQISSPPYYSN  
 LGFYPPQHEEWYSPGMYELRRIIPSETFFFTRETEIMDI PAAKKPRLGHSTGRMKGEELCVVCGDKASGYHY  
 NALTCEGCKGFFRRSITKNAVYKCKNGGNCCEMDMYMRRKCQECRLRKCKQMGMLAECLLTEIQCKSKRLR  
 KNVKQLPDQTVNEDNEGHDMKQVTSTTKMYREKVEFTPEQQNLLDYIMDSYSKQQIQEVSKLLHEEFS  
 AEGNFLILTEMATSHVQVLVEFTKKLPGFQTLDHEDQIALLKGSVEAMFLRSAEIFSRKLPHTGHTVLE  
 ERIRNSGISDEFITPMFNFYKSIGELKMTQEEYALLTAIVILSPDRQYIKDRESVERLQEPLLDILQKFC  
 KLHHPDNPQHFACLLGRLELRTFNHHAEMLSWRVNDHKFTPLLCEIWDVQ

>Q8JJ28\_XENLA

MRQWEDLEQTMANSYVTVSDAYCLAEPLSYDVLDPDHINYQLPESEFQTASCCQYTNMAYSPGLQSPSSQ  
 CHYTSYGLEAAYGDGQYLLSTCELSKSPSTLMTHGVDDVYPSMKRPRGSHASIRMKGHEELCVVCGDKASG  
 YHYNALTCEGCKGFFRRSITKNAVYRCKNGGHCEMDMYMRRKCQECRLKCKKAVGMLAECLLTEVQCKSK  
 RLRKNCKQNNLSILSNVKVEDDGSRSRHSSTTKLTKLPSQLELTGEECKLIDHIVTAHQKCGIPLDDLKI  
 FLEESADPEEIFYHFSEAAMLHVQAFVEFTKRLPGFEMLDHEDQIALLKGSTVETMLLRSALYNQPATG  
 SSLQSTEGGLARYQSHSVDFSQIQEFDRCPYLSLEANSQVSTSTDLTEEFITPLFNFFRSMGSLNVTE  
 AEYALLSAVTVLFSDRPLLQNKPPVEKLEPPLLGILHKYSKLYHPEDPQHAFARLIGRLTELRTLNHNHSE  
 VLISWKARDTKLTPLLYGFWNLQ

>Q6P7H5\_XENLA

MANSYVTVSDAYCLAEPLSYDVLDPDHINYQLPESEFQTASCCQYTNMAYSPGLQSPSSQCHYTSYGLEA  
 AYGDGQYLLSTCELSKSPSTLMTHGVDDVYPSMKRPRGSHASIRMKGHEELCVVCGDKASGYHYNALTCEG  
 CKGFFRRSITKNAVYRCKNGGHCEMDMYMRRKCQECRLKCKKAVGMLAECLLTEVQCKSKRLRKNCKQNN  
 SILSNVKVEDDGSRSRHSSTTKLTKLPSQLELTGEECKLIDHIVTAHQKCGIPLDDLKI FLEESADPEE  
 IFYHFSEAAMLHVQAFVEFTKRLPGFEMLDHEDQIALLKGSTVETMLLRSALYNQPATGSSLQSTEGLA  
 RYQSHSVDFSQIQEFDRCPYLSLEANSQVSTSTDLTEEFITPLFNFFRSMGSLNVTEAEYALLSAVT  
 VLFSDRPLLQNKPPVEKLEPPLLGILHKYSKLYHPEDPQHAFARLIGRLTELRTLNHNHSEVLISWKARDT  
 KLTPLLYGFWNLQ

>VDR\_COTJA

MVSIASAGGYAMPCCCESQELQSSDMETPAVGTPEFDRNVPRICGVCGRATGFHFNAMTCEGCKGFFRR  
 SMKRKAMFTCPFSGDCKITKDNRRHCQACRLKRCVDIGMMKEFILTDEEVQRKREMILKRKEEEALKESL  
 KPKLSEEQQKVINILLEAHHKTFDITYSDFNKFRPPVRSKFSSTATHSSSVVSQDFSSSDSNDVFGSDA  
 FGAFPEPEMPEQMFNSLDLSEESDESPSMNIELPHLPLHLADLVSYSIQKVIQVIGFAKMI PGFRDLTAEDQ  
 IALLKSSAIEVIMLRNSQFTMEDMSWTCGSNDFKYKVSVDVTQAGHSMDLLEPLVKFQVGLKKNLHEEE  
 HVLLMAICILSPDRPGVQDTSLVESIQRDLSDTLQTYIRCRHPPPGSRLLYAKMIQKLDLRSLNHEHHSK  
 QYRCLSFQPEHSMQLTPLVLEVFGEIS

>Q27547\_CHOFU

MMNNGQFPELFGSQWPPDHHGGHSSANTMLHPSMQSTMVKREPHTDVMHSQMGMGMQDIASVADSTSPPP  
GGDGMFSTSMNAMFMDKKGANSIRAQIEIIPCKVCGDKSSGVHYGVITCEGCKGFFRRSQSTVVNYQCPR  
NKACVVDRVNRNRCQYCRLOKCLKLGMRDAVKFGRMSKKQREKVEDEGRFHRAQMRGQTDAPLDSVYDA  
QQQTPSSSDQFHGHYNSYPGYASPISSYGYNNAPSLTSTMIQPHADSAAIRRTSGLCGLTTAYEPKQGG  
FLDADFNWSRRSDISKVLVKS LAEAHANTIPKLEYIHEMLRKPVDVAKQLFYSSMTEAMWLLDCADKLT  
MIQSIIEFAKLMPGFMKLTQDDQILLKSGSFELAIVRLSRLIDVNRDVTVLYGDVVLPIRDCVHARDPRD  
MALIVGIFDAAKTARLKLTTETELALYQSLVHLWPEPHGVRGNHEIQCLFNMSMTAMRHEIETNHHPLKG  
DVTVLDTLLAKLPTFRELSLMHLEALCRFKAHPLHIFPALYKELFSLDSVLDYHV

>NR1D1\_RAT

MEDSSRVSPSKGTSNITKLNGMVLLCKVCGDVASGFHYGVHACEGCKGFFRRSIQQNIQYKRCLKNENCS  
IVRINRNRCCQCRFKCLSVGMSRDAVFRGRIPKREKQRLAEMQAMNLANQLSSLCPLETSPAPHPT  
SGSVGPPPPAPAPTPLVGFSSQFPQQLTPRSPSPPEPTVEDVISQVARAHREIFTYAHDKLGTSPGNFNA  
NHASGSPATTPQCWESQGCPSTPNDNNLLAAQRHNEALNGLRQGPSSYPPTWPSGPAHHSCHQPNNSNGH  
RLCPTHVYSAPEGKAPANGLRQGNNTKNVLLACPMNMYPHGRSGRTVQEIWEDFSMSFTPAVREVVEFAKQ  
IPGFRDLSQHDQVTLKAGTFEVLVRFASLFNVKDQTMFLSRTTYSLQELGAMMGDLLNAMFDFSEK  
LNSLALTEEELGLFTAVVLVSAEGSGMENSASVEQLQETLLGALRALVLKRNRPSETSRFTKLLKLPDLR  
TLNNMHSEKLLSFRVDAQ

>HR3\_DROME

MYTQRMFDMWSSVTSKLEAHANNLQGSNVQSPAGQNNSSGSIKAQIEIIPCKVCGDKSSGVHYGVITCEG  
CKGFFRRSQSSVVNYQCPRNKQCVVDRVNRNRCQYCRLOKCLKLGMSRDAVKFGRMSKKQREKVEDEVRF  
HRAQMRQSDAAPDSVYDTQTPSSSDQLHNNYNSYSGGYSNNEVGYGSPYGSASVTPQQTMQYDISA  
DYVDSTTYEPRSTIIDPEFISHADGDINDVLIKTLAEAHANTNTKLEAVHDMFRKQPDVSRIIYYKNLQ  
EELWLDCAEKLTMIQNIIEFAKLIPGFMRLSQDDQILLKGTGSFELAIVRMSRLDLSQNAVLYGDVML  
PQEAFTYSDSEEMRLVSRIFQTAKSIAELKLTETELALYQSLVLLWPERNGVRGNTEIQRLFNLSMNAIR  
QLETNHAPLKGDVTVLDTLLNNIPNFRDISILHMESLSKFKLQHPNVVFPALYKELFSIDSQQDLT

>Q6DGW7\_BRARE

MNDVWGHVNVVGPQLQIPNDAPFLSESSHFFDILAEQNSPLLQDQEVMPFTSYPSMQYTSVEPSMSSPS  
YYSSQHCYSQYGAEEWYSPSAMFEMRKGPLDGGFDNELDESCPVIPTVCKRSRHAGHSGKSKGEELCVVC  
GDKASGYHYNALTEGCKVFFRRSITKNNAVYKCKSGGNCEMDMYMRRKCQECRLRKCKEMGMLAECLL  
IQCKSKRLRKNTKASSDGSIGDDVVDSRDPKQVVSTTKPSKENIELSQDQALINYIVDAHKNHRIPODM  
AKKLLQEQFNAEENFLLLTEMATSHVQVLVEFTKNI PGFQSLDHEDQIALKGSVAEAMFLRSAQVFSK  
LPNGHTEVLEDRIRRSIGISEEFITPMFNFYKSIGELQMMQEEHALLTAITILSPDRPYVKDQQAVERLQ  
PMLEVLKRKICKLQHPQEPQHARLLGRLTELRLTNHHHAEMLESWRMSDHKFNPLLCEIWDVQ

>Q95P94\_BOMMO

MLNMFDMWNSVSKLEAQSNVQQSQPHTSGGSIKAQIEIIPCKVCGDKSSGVHYGVITCEGCKGFFRRSQ  
STVVNYQCPRNKACVVDRVNRNRCQYCRLOKCLKLGMSRDAVKFGRMSKKQREKVEDEVRYHKAQMRVQA  
DAAPDSVYDAQQQTPSSSDQFHGHYNSYPGYGSPSSYGYNNAGPALPSNMSGMPQPPAQPPEVSGDY  
VDSTTTTYEPKQTGFLDADFI SHVEGDISKVLVKSLEAHANTNPKLDYIHEMFGKPDVSKLLFYNSMTY  
EEMWLLDCADKLTAMIQNIIEFAKLIPGFMKLTQDDQILLKSGSFELAIVRLSRLIDVNRDQVLYGDVVL

PVRECVHARDPRDVALVQGI FEA AKS IARLKL TETELALYQSLVLLWPERHGVMGNSEIRCLFNMSMSAM  
RHEIEVNHAPLKG DVTVLDTLLAKIPTFRDLSLMHLGALS RFRKATHPHHVFPALYKELFSLDSVLDYTHG

>PXR\_HUMAN

MEVRPKESWNHAD FVHCE DTE SVPGKPSVNADEEVGGPQICRVCGDKATGYHFNVMTC EGCKGFFRRAMK  
RNARLRCPFRKGACEITRKRTRQCQACRLRKCLESGMKKEMIMSDEAVEERRALIKRKKSERTGTQPLGV  
QGLTEEQRMIRELMDAQMKTFDTTFSHFKNFRLPGVLSGCELPESLQAPSREEAAKWSQVRKDLCSLK  
VSLQLRGEDGSVWNYKPPADSGGKEIFSL LPHMADMSTYMFKGIISFAKVISYFRDLPIEDQISLLKGAA  
FELCQLRFNTVFNAETGTWECGRLSYCLEDTAGGFQQLLLEPMLKFHYMLKKLQLHEEEYVLMQAI SLFS  
PDRPGVLQHRVVDQLQE QFAITLKS YIECNRPQPAHRFLFLKIMAMLT ELSINAQHTQRLLRIQDIHPF  
ATPLMQELFGITGS

>Q811X2\_MOUSE

MANTYVATSDGYLLAEPTQYYDILPEQFHYQLCDTDFQEPYCYQYSTAQFPPALQSPSLQSHFNTHGLDP  
QYSGGSWCGLDARESGQSTYVVVHDEDEDFPGAQRCRATCSLRWKGQDDMLCMVCGDKASGYHYNALTCE  
GCKGFFRRSITKNAVYSCKNGGHCEMDMYMRKQCQECRLKCKAVGMLAECLLTEIQCKSKRLRKNFKHG  
PALYPAIQVEDEGADTKHVSSSTRSGKGVQDNMTLTQEHRLLNTIVTAHQKSMIPLGETSKLLQEGSNP  
ELSFLRLSEVSVLHIQGLMKFTKGLPGFENLTEDQAALQKASKTEVMFLHVAQLYGTMRPAKPSAGTLE  
VHNPSADESVHSPENFLKEGYPSAPLTDITKEFIASLSYFYRRMSELHVS DTEYALLTATTVLFSDRPCL  
KNKQHIENLQEPVLQLLFKFSKMYHPEDPQHFAHLIGRLTELRTLSHSHSEILRMWKTDPRLVMLFSEK  
WDLHSFS

>VDR\_SAGOE

MEAMAAS TSLPDGDFDRNVPRICGVCGRATGFHFNAMTCEGCKGFFRRSMKRKALFTCPFNGDCRITK  
DNRRHCQACRLKRCVDIGMMKEFILTDEEVQRKREMI LKRKEEEALKDSL RPKLSEEQORIIAILLDAHH  
KTYDPTYSDFCQFRPPVRVNDGGGSHPSRPNRHTPSFSGDSSSCSDHYITSPDMMDSSSFNLDLSEE  
DSDDPSLTLELSQLSMLPHLADLVSYSIQKVIGFAKMI PGFRDLTSEDQIVLLKSSAIEVIMLRSNESFT  
MDDMSWTCGNPDYKYRISDVTKAGHNLELIEPLIKFQVGLKKNLHHEEHVLLMAICIVSPDRPGVQDAA  
LIEAIQDRLSNTLQTYIRCRHPPPGSHLLYAKMIQKLADLRSLNEEHSKQYRCLSFQPESSMKLTPLVLE  
VFGNEIS

>E75B\_DROME

MVCAMQEVAAVQHQQQQQLQLPQQQQQQQT TQQQHATTIVLLTGNGGGLNHIVATPQQHQPMHQLHHQ  
HQHQHQHQQAQSQQLKQQHSALVKLLESAPIKQQQQT PKQIVY LQQQQQPQRKRLKNEAAIVQQQQQT  
PATLVKTTTTSNSNSNNTQT TNSISQQQQQHQIVLQHQQPAAAATPKPCADLSAKNDSSESGIDEDCPNSD  
EDCPNANPAGTSLEDSSYEQYQCPWKKIRYARELLKQRELEQQQT TGGSNAAQQQVEAKPAAIPTSNIKQL  
HCDSPFSAQTHKEIANLLRQQSQQQQVVATQQQQQQQQHQHQQQRRDSSDSNCSLMSNSNSNSAGNCCT  
CNAGDDQQLEEMDEAHDSGCDELCEQHHRDSSQLNYLCQKFDEKLDTALSNSANTGRNTPAVTANE  
DADGFFRRSIQQKIQYRPCTKNQQCSILRINRNCQYCRLLKCI AVGMSRDAVRFGRVPKREKARILAAM  
QQSTQNRGQQRALATELDDQPRLLAAVLAHLETCEFTKEKVSAMRQRARDCPSYSMPTLLACPLNPAP  
LQSEQEFSQRFAHVIRGVIDFAGMIPGFQLLTQDDKFTLLKAGLFDALFVRLICMFDSSINSICLNGQV  
MRRDAIQNGANARFLVDSTFNFAERMNSMNLTD AEIGLFC AIVLITPDRPGLRNLELIEKMY SRLKGCLQ  
YIVAQNRPDQPEFLAKLLETMPDLRTLSTLHTEKLVVFRTEHKELLRQMMWSMEDGNNSDGGQNKSPSGS  
WADAMDVEAAKSP LGSVSSSTESADLDY GSPSSSQPQGVSLPSPFPQQQPSALASSAPLLAATLSGGCPLRN





HDAIRFGRMPQVEREKLLQAEFMDVEPRNPESADLRALSRLCLSYHRHFPLTKSKAKAILSGKTHGNP  
 FVIHDMKSLTAGQYFINCRQLPVLERQRSVLPPEEPAAEELSVFRRIQFRSAEAVQEVEFTKSI PGFT  
 ELDMNDQVILLKYGVIEVMTTMLAPLMNKDGTLFAYGQIFMTREFLKSRLKPFCEMMEPKFEFAAKFNLL  
 ELDDSDMALFFAVIILSGDRPGLVNVKPIEDLQETVILQALELQLKTIHPDCPQLFAKLLMQQ

>Q8SQ01\_MACMU

MEVRPKEGWNHADFYCEDTEFAPGKPTVNADEEVGGPQICRVCGDKATGYHFNVMTCEGCKGFFRRAMK  
 RNARLRCPFRKGACEITRKRTRQCQACRLRKCLES GMKKEMIMSDAAVEERRALIKRKRERIGTQPPGV  
 QGLTEEQRMIRELMDAQMKTFTTFSHFKNFRLPGVLSGCEMPESLQAPSREEAAKWNQVRKDLWSVK  
 VSVQLRGEDGSVWNYKPPADNGGKEIFSLPHMADMSTYMFKGIINFAKVISYFRDLPIEDQISLLKGAT  
 FELCQLRFNTVFNAETGTWECGRLSYCLEDPAGGFQQLLLEPMLKFHYMLKKLQLHEEEYVLMQAISLFS  
 PDRPGVVQHRVVDQLQEYAITLKS YIECNRPQPAHRFLFLKIMAMLTELR SINAHQTQRLLRIQDIHPF  
 ATPLMQELFGITGS

>Q9IB74\_PAROL

MEPTVVSTSSLASDEFDRNMPRICGVCGRATGFHFNAMTCEGCKGFFRRSMKRKATFTCPFNGSCTITK  
 DNRRHCQACRLKRCVDIGMMREFILTDEEVQRKDLIQRKDEEAQREAREARRPRLTDEQSQVIAMLV  
 EAHHKTYDSSYDFCRFRPPVREGPVTRSASRAASLHLSLSDASSDSFSHSPESVDTKVFNLLMMYQEQ  
 GSSPDSSEEEGSSFSMLPHLADLVSYSIQKVIGFAKMI PGFRELTAEDQIALLKSSAIEVIMLRSNQSFN  
 LEDMSWSCGAPDFKYQISDVTKAGHTLELLEPLVKFQVGLKKNLQEEHVMLMAICLLSPDRPGVQDHA  
 RIEALQDRLSETLQAYIQLHHPGGRLLYAKMIQKLADLRSLNEEHKQYRSLSFQPEHSMQLTPLVLEVS  
 GSEVS

>VDR\_RAT

MEATAASTSLPDPGDFDRNVPRICGVCGRATGFHFNAMTCEGCKGFFRRSMKRKALFTCPFNGDCRITK  
 DNRRHCQACRLKRCVDIGMMKEFILTDEEVQRKREMIMKRKEEALKDSL RPKLSEEQQHIIAILLDAHH  
 KTYDPTYADFRDFRPPVRMDGSTGSSPRPTLSFSGNSSSSSDLYTTSLDMMEPSGFNSNLDLNGEDSD  
 PSVTLDLSPMLPHLADLVSYSIQKVIGFAKMI PGFRDLTSDQIVLLKSSAIEVIMLRSNQSFTMDDM  
 SWDCGSQDYKYDVTDVSKAGHTLELIEPLIKFQVGLKKNLHEEHVLLMAICIVSPDRPGVQDAKLVEA  
 IQDRLSNTLQTYIRCRHPPPGSHQLYAKMIQKLADLRSLNEEHKQYRSLSFQPEHSMKLTPLVLEVFGN  
 EIS

>VDR\_BOVIN

MAASTSLPDPGDFDRNVPRICGVCGRATGFHFNAMTCEGCKGFFRRSMKRKALFTCPFNGDCRITKDNR  
 RHCQACRLKRCVDIGMMKEFILTDEEVQRKREMILKRKEEALKDSL RPKLSEEQQRIIAILLDAHHKTY  
 DPTYSDFCQFRPPVRVNDGGGSHPSRPNRHTPSFSGDSSSSCDHCITSSDMMSSSFSNLDLSEEDSD  
 DPSVTLELSQLSMLPHLADLVSYSIQKVIGFAKMI PGFRDLTSEDQIVLLKSSAIEVIMLRSNESFTMDD  
 MSWTCGNQDYKYRVSVDVKAGHSLELIEPLIKFQVGLKKNLHEEHVLLMAICIVSPDRPGVQDAALIE  
 AIQDRLSNTLQTYIRCRHPPPGSHLLYAKMIQKLADLRSLNEEHKQYRCLSFQPECSMKLTPLVLEVFG  
 NEIS

>Q922X0\_MOUSE

MEAMAASTSLPDPGDFDRNVPRICGVCGRATGFHFNAMTCEGCKGFFRRSMKRKALFTCPFNGDCRITK  
 DNRRHCQACRLKRCVDIGMMKEFILTDEEVQRKREMIMKRKEEALKDSL RPKLSEEQQHIIAILLDAHH

KTYDPTYADFRDFRPPIRADVSTGYSYSPRPTLSFSGDSSNSDLYTPSLDMMEPASFSTMDLNEEGSDDP  
 SVTLDLSPLSMLPHLADLVSYSIQKVIGFAKMI PGFRDLTSDDQIVLLKSSAIEVIMLRSNQSFTLDDMS  
 WDCGSQDYKYDITDVSFRAGHTLELIEPLIKFQVGLKKNLHEEEHVLLMAICIVSPDRPGVQDAKLVEAI  
 QDRLSNTLQTYIRCRHPPPGSHQLYAKMIQKLADLRSLNEEHKQYRSLSFQPENSMKLTPLVLEVFGNE  
 IS

>VDR\_MOUSE

MEAMAASSTLPDPGDFDRNVPRI CGVCGDRATGFHFNAMTCEGCKGFFRRSMKRKALFTCPFNDCRITK  
 DNRRHCQACRLKRCVDIGMMKEFILTDEEVQRKREMIMKRKEEALKDSLPRKLEEQQHIIAAILLDAHH  
 KTYDPTYADFRDFRPPIRADVSTGYSYSPRPTLSFSGDSSNSDLYTPSLDMMEPASFSTMDLNEEGSDDP  
 SVTLDLSPLSMLPHLADLVSYSIQKVIGFAKMI PGFRDLTSDDQIVLLKSSAIEVIMLRSNQSFTMDDMS  
 WDCGSQDYKYDITDVSFRAGHTLELIEPLIKFQVGLKKNLHEEEHVLLMAICIVSPDRPGVQDAKLVEAI  
 QDRLSNTLQTYIRCRHPPPGSHQLYAKMIQKLADLRSLNEEHKQYRSLSFQPENSMKLTPLVLEVFGNE  
 IS

>PXR\_RAT

MRPEERWNHVLVQREEADSVLEEPINVDEEDGGLQICRVCGDKANGYHFNVMTCEGCKGFFRRAMKRN  
 RLRCPFRKGTCEITRKTRRQCQACRLKRCLESGMKKEMIMSDAAVEQRRALIKRKKREKIEAPPPGGQGL  
 TEEQQALIQELMDAQMQTFDITFSHFKDFRLPAVFSHDCPEVLQASLLEDPATWSQIMKDSVPMKISV  
 QLRGEDGSIWNYQPPSKSDGKEIIPLLPHLADVSTYMFKGVINFAKVISHFRELPIEDQISLLKGFATFEM  
 CILRFNTMFDTEGTWECGRLAYCFEDPNGGFQKLLLDPLMKFHCMLKQLREEEYVLMQAIISLFSFDR  
 PGVVQRSVVDQLQERFALTLKAYIECSRYPYPAHRFLFLKIMAVLTELRSINAQQTQQLLRIQDTHPFATP  
 LMQELFSSTDG

>Q5RAP4\_PONPY

MDRAPQRQHQASRELLAAKKTHTSQIEVIPCKICGDKSSGIHYGVITCEGCKGFFRRSQRCNAAYSCTRO  
 QNCPIDRTSRNRCQHCRLOKCLALGMSRDAVKFGRMSKKQRDSLHAEVQKQLQQRQQQQEPVVKTPPAG  
 AQGADTLTYTLGLPDGQLPLGSSPDLPEASACPPGLLKASGSGPSYSNNLAKAGLNGASCHLEYS PERGK  
 AEGRESFYSTGSQLT PDRCGLRFEHRHPGLGELGQGPDSYGPSFRSTPEAPYASLTEIEHLVQSVCKS  
 YRETCQLRLEDLLRQRSNIFSRREVTGYQRKSMWEMWERCAHHLTEAIQYVVEFAKRLSGFMELCQNDQI  
 VLLKAGAVEVVLVVMCRAYNADNRTVFFEGKYGMELFRALGCSELISSIFDFSHLSALHFSEDEIALY  
 TALVVLINAYRPLQEKRKVEQLQYNLELAFHHHLCKTHRQSILAKLPPKGLRSLCSQHVERLQIFQHLH  
 PIVVQATFPPLYKELFSTETESPVGLSK

>PPAS\_XENLA

MKEEIPPRSPILDEQPSTPLEHQETSQSVDCICKGDRASGFHYGVHACEGCKGFFRRRTIRMRLQYEHCDR  
 NCKIQKKNRNCQYCRFNKCLSLGMSHNAIRFGRMPSEKRRKLVQAPVSDSAAPDSPVSDLVLSQLIHS  
 SYMNTFTMTKKRARDILTGRNSISPFVIHMDMTLWQAEQGTVWEQLPTQNLGTGTEIGVHVYRCQCTSVE  
 TVRALTDFAKRIPGFGLYLNQVTLTKYGVHEAIFCMLASLMNKDGLLVAGGRGFVTRFLRSLRQPFPC  
 HIMEPKHFHASKFNALELNDSDLALFVASIILCGDRPGLINPSQVEDIQEGILGALRRHLKASHTDAPFL  
 FPKLLHKMADLRQLVTEHAELVQSIKRTESSAALHPLLQEIYRDMY

>Q9IB73\_PAROL

MEPMTVTTSMVGPDEFDRNAPRICGVCGDKATGFHFNAMTCEGCKGFFRRSMKRKASFTCPFNCSCTITK

DNRRHCQACRLKRCIDIGMMKEFILTDEEVQREKEMILKRKEEEAAREAMRPRLNEEQARMISSSLVEAHH  
 KTYDASYSDFSFRFRPPVREGPVTRSASRAASLHSLSDASSDSFNHSPESVDTKMNFSNLLMMYQDGASSP  
 DSSEENTKLSMLPHLADLVSYSIQKVIGFAKMI PGFRDLTAEDQIALLKSSAIEI IMLRSNQSFSLDMS  
 WSCGGPDFKYCINDVTKAGHTLELLEPLVKFQVGLKKNLHHEEHVLLMGICLLSPDRPGVDHARVEQL  
 QDRLPEALQAYIRINHPGGRLLYAKMIQKLADLRSLNEEHSKQYRSLSFQPEHSMQLTPLVLEVFGSEVS

>Q62702\_RAT

MTKSHSGMTKFGSMVLLCKVCGDVASGFHYGVHACEGCKGFFRRSIQQNIQYKKCLKNENCSIMRMNRNR  
 CQQCRFKKCLSVGMSRDRVRFGRIPKREKQRMLIEMQSAMKTMMSQFGGHLQSDTLAEPHEQSVPPAQE  
 QLRPSPSWSKKTSKAPLLLLLILQRRKVI GMVTRAHKDTFLYNQEHRENSSESMPPHRGERIPRNVQYNL  
 NHDHRGGGLHSHFPCSESQHLGQYKGRNMMHPNGHTVCI SNHGCNVFSSAYPQRVCDRIPVGGCSQT  
 ESRNSYLCSTGGRMHLVCPMSKSPYVDPQKSGHEIWEFMSFTPAVKEVVEFAKCI PGFRDLSQHDQVN  
 LLKAGTFEVLVRFASLFDKERTVTFLSGKKYSVDDLHSMGAGDLLSSMFEFSEKLNGLQLSDEEMSLF  
 TAVVLVSADRSGIENVNSVEALQETLIRGRGRTLIMKNHPNEASIFTKLLKLPDLRSLNMMHSELLAF  
 KVHP

>PXR\_MOUSE

MRPEESWSRVGLVQCEEADSALEEPINVEEEDGGLQICRVCGDKANGYHFNVMTCEGCKGFFRRAMKRN  
 RLRCPFRKGTCEITRKTRRQCQACRLRKCLESGMKKEMIMSDAAVEQRRALIKRKKREKIEAPPPGGQGL  
 TEEQQALIQELMDAQMQTFDFTFSHFKDFRLPAVHSHGCELPFLQASLLEDPATWSQIMKDRVPMKISL  
 QLRGEDGSIWNYQPPSKSDGKEIIPLLPHLADVSTYMFKGVINFAKVISYFRDLPIEDQISLLKGFEM  
 CILRFNTMFDTETGTWECGRLAYCFEDPNGGFQKLLLDPLMKFHCMLKQLHKEEYVLMQAI SLFSPDR  
 PGVVQRSVVDQLQERFALTLKAYIECSRYPAPHRFLFLKIMAVLTELRSINAQQTQQLLRIQDHPFATP  
 LMQELFSSTDG

>RORG\_MOUSE

MDRAPQRHHRTRSRELLAAKKTHTSQIEVIPCKICGDKSSGIHYGVITCEGCKGFFRRSQQCNVAYSCTRQ  
 QNCPIDRTSRNRCQHCRLOKCLALGMSRDAVKFGRMSKKQRDSLHAEVQKQLQQQQQEQVAKTPPAGSR  
 GADTLTYTLGLSDGQLPLGASPDLPASACPPGLLRASGSGPPYSNTLAKTEVQGASCHLEYS PERGKAE  
 GRDSIYSTDGLTLGRGCLRFEETRHPPELGEPEQGPDSHCIPSFCSAPEVPYASLTDIEYLVQNVCKSFR  
 ETCQLRLEDLLRQRTNLF SREEVTSYQRKSMWEMWERCAHHLTEAIQYVVEFAKRLSGFMELCQNDQIIL  
 LTAGAMEVVLVRCRAYNANNHTVFFEGKYGGVELFRALGCSELISSIFDFSHFLSALCFSEDEIALYTA  
 LVLINANRPGLQEKRREHLQYNLELAFHHHLCKTHRQGLLAKLPKGLRSLCSQHVEKQLIFQHLHPI  
 VVQAAFPPPLYKELFSTDVESPEGLSK

>Q9NH86\_AEDAE

MLRDAPNRSELEMAVSSSTVFDMSLAQIEIIPCKVCGDKSSGVHYGVITCEGCKGFFRRSQSSVVNYQCPR  
 NKQCVVDRVNRNRCQYCRLOKCLKLGMSRDAVKFGRMSKKQREKVEDEVRFHRAQMRASDAAPDSSVFD  
 TQTPSSSDQLHHGGYNGYAYNNEVGYGSPYGYSTSVTPQQTMGYDISADYVDSTTTYEPRSTIIDSDFIS  
 GHTEGDINDVLIKTLAEAAHANTNHKLEIVHDMFRKSQDVTRIMYYKNMSQEELWLDCAEKL TAMIQQIIE  
 FAKLIPGFMRLSQDDQIILLKTSFELAIVRMSRLMDLSTNSVLYGDIMLPQEVFYTSDFS FEMKLVACIF  
 ETAKSIAELKLTETELALYQSLVLLWPERNGVRGNTETIQRLEFEMSMSAIRQEIEANHAPLKGDVTVLEIL  
 LNKIPTFRELSIMHMEALQKFKQDHPQYVFPALYKELFIDSQQDLMT

>VDR\_XENLA

MEFMAATTSIADTDMFEDKNVPRICGVC GDKATGFHFNAMTCEGCKGFFRRSMKRKAMFTCPFN GDCRIT  
 KDNRRHCQSCRLKRCVDI GMMKEFILTDEEVQRKRQMINKRKSEEALKESMRPKISDEQQKMIDILLEAH  
 RKTFTDTTYSDFNKFRPPVRENVDPFRRITRSSSVHTQGSPESDSDVFTSSPDSSEHGFFSASLFGQFEYS  
 SMGGKSGELSMLPHIADLVSYSIQKIIGFAKMI PGFRDLIAEDQIALLKSSVIEVIMLRSNQSFSLDDMS  
 WTCGSEDFKYKVDDVTQAGHNMEELLEPLVKFQVGLKLDLHEEEHVLLMAICILSPDRPGLQDKALVESI  
 QDRLSSTLQTYIILCKHPPPGSRLLYAKMIQKLADLRSLNEEHSKQYRSISFLPEHSMKLTPLMLEVFSDE  
 IP

>Q98934\_CHICK

MRAQIEVIPCKICGDKSSGIHYGVITCEGCKGFFRRSQNNASYS CPRQRNCLIDRTNRNRCQHCR LQKC  
 LALGMSRDAVKFGRMSKKQRDSL YAEVQKHQRLQEQRQQSGEAEALARVYSNSISNGLGNLNNETGST  
 YSNGHVIDLPKSEGYNVDSAQPS PDQSGLDMTGIKQIKQEPIYDLTSV PNLFTYSSFNNGQLAPGISMT  
 EIDRIAQNI IKSHLETCQYTM EELHQLAWQTHTYEEIKVYQSKTREALWQQCAIQITHAIQYVVEFAKRI  
 TGFMELCQNDQI LLLKSGCLEVVLVRMCRAFNP LNNTVLFEGKYGGM QMFKALGSDDL VNEAFDFAKNLC  
 SLQLTEEEIALFSSAVLISP DRAWLIEPRKVQKLQEKIYFALQHVIQKNHL DDETLTKLIAKIPTITALC  
 NLHGEKLVFKQSHPDIVNTLFP PLYKELFNP DSTTGCK

>RORB\_MOUSE

MRAQIEVIPCKICGDKSSGIHYGVITCEGCKGFFRRSQNNASYS CPRQRNCLIDRTNRNRCQHCR LQKC  
 LALGMSRDAVKFGRMSKKQRDSL YAEVQKHQRLQEQRQQSGEAEALARVYSSSISNGLSNLNTETGGT  
 YANGHVIDLPKSEGYNSIDSGQPS PDQSGLDMTGIKQIKQEPIYDLTSV PNLFTYSSFNNGQLAPGITMS  
 EIDRIAQNI IKSHLETCQYTM EELHQLAWQTHTYEEIKAYQSKSREALWQQCAIQITHAIQYVVEFAKRI  
 TGFMELCQNDQI LLLKSGCLEVVLVRMCRAFNP LNNTVLFEGKYGGM QMFKALGSDDL VNEAFDFAKNLC  
 SLQLTEEEIALFSSAVLISP DRAWLIEPRKVQKLQEKIYFALQHVIQKNHL DDETLAKLIAKIPTITAVC  
 NLHGEKLVFKQSHPDIVNTLFP PLYKELFNP DCAAVCK

>RORB\_RAT

MRAQIEVIPCKICGDKSSGIHYGVITCEGCKGFFRRSQNNASYS CPRQRNCLIDRTNRNRCQHCR LQKC  
 LALGMSRDAVKFGRMSKKQRDSL YAEVQKHQRLQEQRQQSGEAEALARVYSSSISNGLSNLNTETGGT  
 YANGHVIDLPKSEGYNIDSGQPS PDQSGLDMTGIKQIKQEPIYDLTSV HNLFTYSSFNNGQLAPGITMS  
 EIDRIAQNI IKSHLETCQYTM EELHQLAWQTHTYEEIKAYQSKSREALWQQCAIQITHAIQYVVEFAKRI  
 TGFMELCQNDQI LLLKSGCLEVVLVRMCRAFNP LNNTVLFEGKYGGM QMFKALGSDDL VNEAFDFAKNLC  
 SLQLTEEEIALFSSAVLISP DRAWLLEPRKVQKLQEKIYFALQHVIQKNHL DDETLAKLIAKIPTITAVC  
 NLHGEKLVFKQSHPDIVNTLFP PLYKELFNP DCAAVCK

>RORB\_HUMAN

MRAQIEVIPCKICGDKSSGIHYGVITCEGCKGFFRRSQNNASYS CPRQRNCLIDRTNRNRCQHCR LQKC  
 LALGMSRDAVKFGRMSKKQRDSL YAEVQKHQRLQEQRQQSGEAEALARVYSSSISNGLSNLNNETSGT  
 YANGHVIDLPKSEGYNVDSGQPS PDQSGLDMTGIKQIKQEPIYDLTSV PNLFTYSSFNNGQLAPGITMT  
 EIDRIAQNI IKSHLETCQYTM EELHQLAWQTHTYEEIKAYQSKSREALWQQCAIQITHAIQYVVEFAKRI  
 TGFMELCQNDQI LLLKSGCLEVVLVRMCRAFNP LNNTVLFEGKYGGM QMFKALGSDDL VNEAFDFAKNLC  
 SLQLTEEEIALFSSAVLISP DRAWLIEPRKVQKLQEKIYFALQHVIQKNHL DDETLAKLIAKIPTITAVC  
 NLHGEKLVFKQSHPEIVNTLFP PLYKELFNP DCATGCK

>Q7ZU39\_BRARE

MYLMITAMKAQIESIPCKICGDKSSGIHYGVITCEGCKGFFFRGSQQGTVSYSYSCPRQKSCSLIDRTSRNRCQ  
 HCRLQKCLAVGMSRDAVKFGRMSKKQRDSLFAEVQKHRQQQDDKTGDESEKNQESQAPGEAEPLTPSYA  
 LSSSGVTEIPDDLGSYVNGQTQEEGKADSAIGGFYLDIQSPDQSGLDMDGIKLEPVCDLSSSDSGLDQYC  
 CYSNGDASPPHDDLEHLSENICKSHLETCQYLREELQPSNWQTVLQSNLEAYQKKSQEDMWQLCAVKVTE  
 AVQYVVEFAKRIDGMELCQNDQIVLLKAGSLEVVFVRMCRAYNSQNNTVFFDSKYAGPEVFKALGCDDL  
 ISSVFEFAKSLNSLQLSEDEIGLFSAYVLMADRSLWQEKTRVEKLLQKIKIALQNLQKNQRDEGILTK  
 LVCKVSTVRMLCRHHMEKLSAFRALYPEMVHTRFPPLYKELFGSDFEQILPQEA

>Q91839\_XENLA

MWKVQETLVLEEEEEEDASNSCGTGEDEDDGDPKICRACGDRATGYHFNAMTCEGCKGFFRRAVKNRNL  
 LSCPFQNSCVINKSNRRHCQACRLKKCLDIGMRKELIMSDAAVEQRRALIKRKHKLTKLPPTPPGASLTP  
 EQQHFLTQLVGAHTKTFDFNFTFSKNFRPIRRSSDPTQEPQATSSEAFMLPHISDLVTYMIKGIISFAK  
 MLPYFKSLDIEDQIALLKGSVAEVS VIRFNTVFNSDTNTWECGPFTYDTEDMFLAGFRQLFLEPLVRIHR  
 MMRKLNQSEYAMMAALSIFASDRPGVCDWEKIQKLQEHIALTLKDFIDSQRPPSPQNRLLYPKIMECL  
 TELRTVNDIHSKQLLEIWDIQPDATPLMREVFSGPE

>Q8AVZ2\_XENLA

MWKVQETLVLEEEEEEDASNSCGTGEDEDDGDPKICRACGDRATGYHFNAMTCEGCKGFFRAMKNRNL  
 LSCPFQNSCVINKSNRRHCQACRLKKCLDIGMRKELIMSDAAVEQRRALIKRKHKLTKSPPTPPGASLTP  
 EQQHFLTQLVGAHTKTFDFNFTFSKNFRPIRRSSDPTQEPQATSSEAFMLPHISDLVTYMIKGIISFAK  
 MLPYFKSLDIEDQIALLKGSVAEVS VIRFNTVFNPDNTWECGPFTYDTEDMFLAGFRQLFLEPLVRIHR  
 MMRKLNQSEYAMMAALSIFASDRPGVCDWEKIQKLQEHIALTLKDFIDSQRPPSLQNRLLYPKIMECL  
 TELRTVNDIHSKQLLEIWDIQPDATPLMREVFSGPE

>Q9TU02\_RABIT

MGGKPTISADEEEGPQTRCVCGDKANGYHFNVLTCEGCKGFFRRTVKRNARLRCPFRKGACEITRKTRRQ  
 CQACRLRKCLESGMKEMIMSDVAVAQRRALIKRKKRERMEAQPPGMQGLTGEQRMII EELMDAQMKTFD  
 TTFSHFKNFRLPEVLGSGCEIPESLQALTEEEAGRWRQIQEELGTMKLSLQLRGEDGSVWNYTPPADRS  
 KKLFSLLPHLADMSTYMFKGIINFAKVISYFRDLPIEDQISLLKGATLELCLLRFNTVFNAETGTWECGR  
 LSYCVEDPEGGFQQLLVDPPLKHFHYMLKQLHKEEYVLMQAISLFSPPDRPGVVQREVVDQLQERFAITL  
 KAYIECSRQPQTHRFLLKIMAVLTELRTINAQHTQRLRLRIQDTHPFATPLMRELFSTTDD

>Q9U5G3\_BOMMO

MVRTMSCGAELRERHSVLVSMLEARRESSDSGCSSDSSDVERDSTKCSCDRGGFFRRSIQQKIQYRPCTK  
 NQQCSILRINRNRCQYCRLLKCCIAVGMSRDAVRFGRVPKREKARILAAMQQSSSSRAHEQAAAAELDDAP  
 RLLARVVRAHLDTCEFTRDRVASMRRARDCPTYSQPTLACPLNPAPQLQSEKEFSQRFHAVIRGVIDFA  
 GLIPGFQLLTQDDKFTLLKSGLFDALFVRLICMFDAPLNSIICLNQQLMKRDSIQSGANARFLVDSTFKF  
 AERMNSMNLTD AEIGLFC AIVLITPDRPGLRNIELVERMHSRLKACLQAVIAQNRPERPGFLRELMDTLP  
 DLRTLSTLHTEKLVVFRTEHKELLRQOMWNEEGVSWADSVVEESARSPSGSVSSSESGEVPSDCGTPLL  
 AATLAGRRRLDSRGSVDEEALGVAHLAHLNGLTVTVPVRPPRYRKLDSPTDSGIESGNEKHERIIGPGSGC  
 SSPRSSLEEHTEDRRPTAPADDMPVLKRVLQAPPLYGGTSTLMDETYKPHKKFRAMRRDTGEAEARPVQP  
 TPSPQPLHHPASPAPHAHSRPPRISLSSHVSVLAKSLMEGPRMTPEQLKRTDMIQQYMRNEAGSSVE

GCPLRTGLLTCYRGASPAPPPVLALQVDVTDAPLNLSKKSPPSPRSYMPQMLEA

>NHR23\_CAEEEL

MACKVTGPNRHLLTSVLEMSSFVYWPRSRQQAHNFPMQAVEQKLABATRTLHAKSSLQPSLSIETPKSKEN  
 DESGCESSNCMFHPHTIKSEPNFCFAREFKSVPPDDFRIGGGDLQMGNNKRLTCVIDTNRVDMAGILPDN  
 MSFRGLPENKSLLSAQIEVIPCCKVCGDKSSGVHYGVITCEGCKGFFRRSQSSIVNYQCPRQKNCVVDVDRV  
 NNRRCQYCRLLKCIELGMSRDAVKFGRMSKKQREKVEDEVRMHKELAANGLGYQAIYGDYSPPPSHPSYC  
 FDQSMYGHYPSGTSTPVNGYSIAVAATPTTTPMPQNMYGATPSSTNGTQYVAHQATGGSFSPQVPEEDVA  
 TRVIRAFNQHSSYTTQHGVCNVDPDCIPHLSRAGGWELFARELNPLIQAIIEFAKSIDGFMNLPQETQI  
 QLLKGSVFELSIVFAAMYYNVDAQAVCGERYSVPFACLIAEDDAEMQLLIVEVNNLQEIIVHLQPHQSELA  
 LLAAGLILEQVSSSHGIGILDTATIATAETLNALYQSVMPRIGCMEDTIHRIQDVETRIRQRTARLHQEA  
 LQNFRMSDPTSSEKLPALYKELFTADRP

>Q6Q2C9\_PLOIN

MVRAMSCGAELRERHSVLVSMLEARRESSDSGCSSESSDIERDSNCRCDSSQGFFRRSIQQKIQYRPTCK  
 NQQCSILRINRRCQYCRLLKCIAVGMSRDAVRFGRVPKREKARILAAMQSSSTTRAHEALAAAELDDGP  
 RLLARVVAHLDTCEFTTRERVAAMRKRARDCTYSQPTLACPLNPAPELQSEKEFSQRFQFAHVRGVIDFA  
 GLIPGFQLLTQDDKFTLLKSGLFDALFVRLICMFADPLNSIICLNGQLMKRDSIQSGANARFLVDSTFKF  
 AERMNSMNLTDAEIGLFCIVLITPDRPGLRNIELVERMHSRLKSCLOTVIAQNRSDRPGFLRELMDTLP  
 DLRTLSTLHTEKLVVFRTEHKELLRQQMWGEEGVSWADSGADESARSPIGSVSSSEGETTGDCGTPLL  
 AATLAGRRRLDSRGSVDEEALGVAHLAHLNGLTVPVRPPRYRKLDSPTDSGIESGNEKHERIVGPGSGC  
 SSPRSSLEEHSEDRRPMAPADDMPVLKRVLQAPPLYDAGLLMDEAYKPHKKFRAMRRDTGEAEARVVRPT  
 PSPQPQHPHPASVPHPAHSRPMRASLSSTHSLVLAQSLMEGPRMTPPEQLKRTDTIQQYMRRGETGAAEG  
 CPLRAGLLTCYRGASPAPQSVLALQVDVAEADAPQPLNLSKKSPPSPPPPPPPSPRSYMPMLPA

>Q8SXA4\_DROME

MTAQIEIIPCCKVCGDKSSGVHYGVITCEGCKGFFRRSQSSVVNYQCPRNKQCVVDVDRVNRRCQYCRLLQKC  
 LKLGMSRDAVKFGRMSKKQREKVEDEVRFHRAQMRQSDAAPDSSVYDTQTPSSSDQLHHNNYNSGGYSN  
 NEVGYGSPYGYASVTPQQTMYDISADYVDSTTYEPRSTIIDPEFISHADGDINDVLIKTLAEAHANTN  
 TKLEAVHDMFRKQPDVSRILYYKNLQEEELWLDCAEKLQMIQNIIEFAKLI PGFMRLSQDDQILLKKTG  
 SFELAIVRMSRLDLSQNAVLYGDVMLPQEAFTYSDSEEMRLVSRIFQTAKSIAELKLTETELALYQSLV  
 LLWPERNGVRGNTIEIQRLEFNLSMNAIRQELETNHAPLKGDVTVLDTLLNNIPNFRDISILHMESLSKFKL  
 QHPNVVFPALYKELFIDSQQDLT

>Q5REL4\_PONPY

MLGHELRCVCGDKASGFHYNVLSCEGCKGFFRRSVVRGGARRYACRGGGTCQMDAFMRRKQQCRLRKCK  
 EAGMREQCVLSEEQIRKKKIRKQQQQSQSQSQSPAGPQSGSCSSTSGPGASPGGSEAGSQSGEGEGVQL  
 TAAQELMIQQVLAAQLQCNKRSFSDQPKVTEIVDFAKQVPGFLQLGREDQIALLKASTIEIMLLETARRY  
 NHETECITFLKDFYTSKDDFHRAQLQVEFINPIFEFSRAMRRLGLDDAEYALLIAINI FSADRPNVQEPG  
 RVEALQQPYVEALLSYTRIKRPQDQLRFPRMLMKLVSLRTLSSVHSEQVFALRLQDKKLPPLLSEIWDVH  
 E

>Q5R8V3\_PONPY

MEAMAASLTPDPGDFDRNVPRICGVCGDRATGFHFNAMTCEGCKGFFRRSMKRKALFTCPFNDCRITK

DNRRHCQACRLKRCVDIGMMKEFILTDEEVQRKREMI LKRKEEEALKDSL RPKLSEEQQRI IAILLDAHH  
 KTYDPTYSDFCQFRPPVRVNDGGGSHPSRPNRHTPSFSGDSSSSCS DNCITSPDMMSSSFSNLDLSEE  
 DSDDPVSTLELSQLSMLPHLADLVSYSIQKVI GFAMIPGFRDLTSEDQIVLLKSSAIEVIMLRSNESFT  
 MDDMSWTCGNQDYKYRISDVTKAGHSLELIEPLIKFQVGLKKNLHHEEHVLLMAICIVSPDRPGVQDAA  
 LIEAIQDRLSNTLQTYIRCRHPPPGSHLLYA

>NR1I3\_MOUSE

MTAMLTLETMASEEEYGPRNCVVCGRATGYHFHALTCEGCKGFFRRTVSKTIGPICPFAGRCEVSKAQR  
 RHC PACRLQKCLNVGMRKDMILSAEALALRRARQAQRRAEKASLQLNQOQKELVQILLGAHTRHVGLFD  
 QFVQFKPPAYLFMHHRPFQPRGPVLP LLTHFADINTFMVQQI IKFTKDLPLFRSLTMEDQISLLKGAAVE  
 ILHISLNTTFCLQ TENFFCGPLCYKMEDAVHAGFYEFLESILHFHKNL KGLHLQEPEYV LMAATALFSP  
 DRPGVTQREEIDQLQEEMALILNNHIMEQQSRLQSRFLYAKLMGLLADLRSINNAYS YELQRLEELSAMT  
 PLLGEICS

>Q811W9\_MOUSE

MANTYVATSDGYLAEPTQYYDILPEQFHYQLCDTDFQEPYCYQYSTAQFPPALQSPSLQSHFNTHGLDP  
 QYSGGSWCGLDARESGFFRRSITKNAVYSCKNGGHCEMDMYMRRKCQECRLKKCKAVGMLAECLL TEIQC  
 KSKRLRNFKHGPALYPAIQVEDEGADTKHVSSSTRSGKGVQDNMTLTQEEHRLNNTIVTAHQSMIPLG  
 ETSKLLQEGSNPELSFLRLSEVSVLHIQGLMKFTKGLPGFENLT TEDQAALQKASKTEVMFLHVAQLYGG  
 KDSTSGSTMRPAKPSAGTLEVHNPSADESVHSPENFLKEGYPSAPLTDITKEFIASLSYFYRRMSELHVS  
 DTEYALLTATTVLFSDRPLKNQH IENLQEPVLQLLFKFSKMYHPEDPQHFAHLIGRLTELRTL SHSHS  
 EILRMWKTDPRLVMLFSEKWDLHSFS

>NR1I3\_HUMAN

MASREDELRCNVVCGDQATGYHFNALTCEGCKGFFRRTVSKSIGPTCPFAGSCEVSKTQRRHCPACRLQK  
 CLDAGMRKDMILSAEALALRRAKQAQRRAQQTPVQLSKEQEELIR TLLGAHTRHMGTMFEQFVQFRPPAH  
 LFIHHQPLPTLAPVLPVTHFADINTFMVLQVIKFTKDLPVFRSLPIEDQISLLKGAAVEICHIVLNTTF  
 CLQTQNFLCGPLRYTIEDGARVSPTVGFQVEFLELLFHFHGT LRKLQEQEPEYVLLAAMALFSPDRPGVT  
 QRDEIDQLQEEMALTLSYIKGQQRRPRDRFLYAKLLGLLAE LRSINEAYGYQIQHIQGLSAMP LLQEI  
 CS

>NR1I3\_MACMU

MASREDELRCNVVCGDQATGYHFNALTCEGCKGFFRRTVSKSIGPTCPFAGSCEVSKIQRHCPACRLQK  
 CLDAGMRKDMILSAEALALRRAKQAQRRAQQTPMQLSNEQEELIQ TLLGAHTRHMGTMFEQFVQFRPPAH  
 LFIHHQPLPTLAPVLPVTHFADVNTFMVQQVIKFTKDLPVFRSLPIEDQISLLKGAAVEICHIVLNTTF  
 CLQTQNFLCGPLRYTIEDAARVSPAVGFQVEFLELLFHFHGT LRKLQEQEPEYVLLAAMALFSPDRPGVT  
 QRHEIDQLQEEMALTLSYIKGQQRRPRDRFLYAKLLGLLAE LRSINEAYGYQIQHIQGLSAMP LLQEI  
 CS

>CNR14\_CAEL

MSFETKPNYLLLTNPDTPLSVCTSPYYSPSGKTASIPSEASKPEGTNGQWSHLPTGATYVTDEFSSFEQ  
 IQNGSTAAQSGNANNYADPLSHRRYFNNVNGYNHHQFYDTASQASVSSPATSVTSSLSPPDSLSNGHTTQ  
 RHHIGKAISFCKVCGDKASGYHYGVTSCEGCKGFFRRS IQRKIDYRCLKQQVCEIKRESRNCQYCRFKK  
 CLDSGMSKDSVRQMKFRNAMRDDKSPDSVVFPEISTLERQEEVDAVYEAVLRAHTTFSFYTDIKIRSIVA



RPFNVRINEDSKMNRNLNAWQIYAHEIDVDIKEVNVFVKEIPKFNFIGNDKAVLLRKNAPPLYLLRIVRG  
 MSNRLMLRDGRLIDFKSLQLLYGSLADEMLAFANHIITIGCTDGDIALFIVLILCQPLTTEQQFSTNFK  
 SQLQLEMFDFYKVLVFKMTCRIDGCDTYQLMKCIHELNRLNELHKQQLNILRENLSFNLPLVEM  
 FQLSTLPLPVNHNQENQYTPAPEHQSPQPQQPTPNQQQTPVHC

>Q9U3F1\_CAEEEL

MSFETKPNYLLLTNPDTPLSVCTSPYYSPPSGKTASIPSEASKPEGTNGQWSHLPTGATYVTDEFSSSEQ  
 IQNGSTAAQSGNANNYADPLSHRRYFNNVNGYNHHQFYDTASQASVSSPATSVTSSLSPPDSLNGHTTQ  
 RHHIGKAISFCKVCGDKASGYHYGVTSCGCKGFFRRSIQRKIDYRCLKQQVCEIKRESRNRQCYCRFKK  
 CLDSGMSKDSVRQMKFRNAMRDDKSPDSVVFPEISTLERQEEVDAVYEAVLRAHTTFSFYTDIKIRSIVA  
 RPFNVRINEDSKMNRNLNAWQIYAHEIDVDIKEVNVFVKEIPKFNFIGNDKAVLLRKNAPPLYLLRIVRG  
 MSNRLMLRDGRLIDFKSLQLLYGSLADEMLAFANHIITIGCTDGDIALFIVLILCQPLTTEQQFSTNFK  
 SQLQLEMFDFYKVLVFKMTCRIDGCDTYQLMKCIHELNRLNELHKQQLNILRENLSFNLPLVEM  
 FQLSTLPLPVNHNQESIRALNHSSQRQINNRLPFTASHLCQILIRFHSNTIHLQIISL

>NR1I3\_PHOSI

MASGEDGPRSCMVCGRATGYHFHALTCEGCKGFFRRTVSKNTGLTCCPFAGSCKVNKAQRRHCPACRLQK  
 CLDAGMKKEMILSAEALAQRRAKQAORRAQWAAVQLSKGQQELVQTLGGAHARHVGTMFQFVQFRPPAH  
 LFIHHQRLPIPLPPLLEHFAEVNTFMVQQVIKFTKDLPLFRSLPMEDQISLLKGAAVEICHIALNTTF  
 CLQTRNFLCGPLRYTLEDGVHVGFEFLELLFRFHATLRRFQLQEPEYVLMAMALFSPDRPGVTQKEE  
 IDRLQEMMALTLSYIKGQPPRRHRDRFLYAKLLGLLAELRSINNAYGYQIQHIQGLSAMMPLLQEICS

>NR1I3\_CALUR

MASGEDGPRSCMVCGRATGYHFHALTCEGCKGFFRRTVSKNTGLTCCPFAGNCKVNKAQRRHCPACRLQK  
 CLDAGMKKEMILSAEALVQRRAKQAORRAQWAPVQLSKGQQELVQTLGGAHARHVGTMFQFVQFRPPAH  
 LFIHHQRLPIVPALPLLKHFAEVNTFMVQEVKFTKDLPLFRSLPMEDQISLLKGAAVEICHIALNTTF  
 CLQTRNFLCGPLCYALEDGVHVGFEFLELLFRFHATLRRQLQEPEYVLMAMALFSPDRPGVTRREE  
 IDRLQEVTAALTLSYIKGQPPRRDRFLYAKLLGLLAELRSIDNAYGYQIQHIQGLSAMMPLLQEICS

>Q811X1\_MOUSE

MANTYVATSDGYLAEPTQYYDILPEQFHYQLCDTDFQEPYCYQYSTAQFPPALQSPSLQSHFNTHGLDP  
 QYSGGSWCGLDARESGQSTYVVVHDEDEFPGAQRCRATCSLRWKGQDDMLCMVCGDKASGYHYNALTCE  
 GCKGFFRRSITKNAVYSCKNGGHCEMDMYMRKQCQECRLKKCKAVGMLAECLLTEIQCKSKRLRKNFKHG  
 PALYPAIQVEDEGADTKHVSSSTRSGKGVQDNMTLTQEEHRLNNTIVTAHQKSMIPLGETSKLLQEGSNP  
 ELSFLRLSEVSVLHIQGLMKFTKGLPGFENLTEDQAALQKASKTEVMFLHVAQLYGGKDSTSGSTMTPA  
 KPSAGTLEVHNPSADESVHSPENFLKEGYPSAPLTEE

>Q811X0\_MOUSE

MANTYVATSDGYLAEPTQYYDILPEQFHYQLCDTDFQEPYCYQYSTAQFPPALQSPSLQSHFNTHGLDP  
 QYSGGSWCGLDARESGQSTYVVVHDEDEFPGAQRCRATCSLRWKGQDDMLCMVCGDKASGYHYNALTCE  
 GCKGFFRRSITKNAVYSCKNGGHCEMDMYMRKQCQECRLKKCKAVGMLAECLLTEIQCKSKRLRKNFKHG  
 PALYPAIQVEDEGADTKHVSSSTRSGKGVQDNMTLTQEEHRLNNTIVTAHQKSMIPLGETSKLLQEGSNP  
 ELSFLRLSEVSVLHIQGLMKFTKGLPGFENLTEDQAALQKASKTEVMFLHVAQLYGTMRPAKPSAGTLE  
 VHNPSADESVHSPENFLKEGYPSAPLTEE

>Q6GZ84\_HUMAN

MLPKRSRRTVSKSIGPTCPFAGSCEVSKTQRRHCPACRLQKCLDAGMRKDMILSAEALALRRRAQAQORRA  
 QQTPVQLSKEQEELIRTLGHAHTRHMGTMFEQFVQFRPPAHLFIHHQPLPTLAPVLPVTHFADINTFMV  
 LQVIKFTKDLPVFRSLPIEDQISLLKGAAVEICHIVLNTTFCLQTQNFCLGPLYRTIEDGARVGFQVEFL  
 ELLFHFHGTLRKQLQEPEYVLLAAMALFSPAPYLTDPRPGVTQRDEIDQLQEEMALTLQSYIKGQQRPR  
 DRFLYAKLLGLLAEELRSINEAYGYQIQHIQGLSAMPPLLQEICS

>Q6GZ68\_HUMAN

MLPKRSRRTVSKSIGPTCPFAGSCEVSKTQRRHCPACRLQKCLDAGMRKDMILSAEALALRRRAQAQORRA  
 QQTPVQLSKEQEELIRTLGHAHTRHMGTMFEQFVQFRPPAHLFIHHQPLPTLAPVLPVTHFADINTFMV  
 LQVIKFTKDLPVFRSLPIEDQISLLKGAAVEICHIVLNTTFCLQTQNFCLGPLYRTIEDGARVGFQVEFL  
 ELLFHFHGTLRKQLQEPEYVLLAAMALFSPDRPGVTQRDEIDQLQEEMALTLQSYIKGQQRPRDRFLY  
 AKLLGLLAEELRSINEAYGYQIQHIQGLSAMPPLLQEICS

>Q8IQS1\_DROME

MGEELPILKGIKGNVNYHNAPVRFGRVPKREKARILAAMQQSTQNRGQQRALATELDDQPRLLAAVLA  
 HLETCEFTKEKVSAMRQRARDPCPSYSMPTLLACPLNPAPQLQSEQEFQRFAHVIRGVIDFAGMIPGFQL  
 LTQDDKFTLLKAGLFDALFVRLICMFDSSINSIICLNGQVMRRDAIQNGANARFLVDSTFNFAERMNSMN  
 LTDAEIGLFCIAVLIPTDRPGLRNLELIEKMYSRKGCQYIVAQNRPDQPEFLAKLLETMPDLRRTLSTL  
 HTEKLVVFRTEHKEKLLRQMQWMSMEDGNSSDGQQNKSPSGSWADAMDVEAAKSPLGSVSSSTESADLDYGS  
 SSSQPQGVSLPSPPPQQPSALASSAPLLAATLSGGCPLNRANSRSGSSGDSGAAEMDIVGSHAHLTQNGLT  
 ITPIVRHQQQQQQQQIGILNNAHSRNLNGGHAMCQQQQHPQLHHHLTAGAARYRKLDSPTDSGIESGN  
 EKNECKAVSSGGSSSSSPSSVDDALDCSDAAANHNQVQHPQLSVVSVSPVRSQPSTSSHLKRQIVE  
 DMPVLKRVLQAPPLYDTNSLMDEAYKPHKKFRALRHRFETAEDASSSTSGSNSLSAGSPRQSPVNSV  
 ATPPPSAASAAAGNPAQSQLHMHLTRSSPKASSSHSVLAKSLMAEPRMTPEQMKRSDIQNYLKRENS  
 TAASSTTNGVGNRSPSSSSTPPPSAVQNQRWSSSVITTTCCQQRQSVSPHNSGSSSSSSSSSSSSSS  
 SSTSSNCSSSSASSCQYFQSPHSTSNGTAPASSSSGNSATPLLELQVDIADSAQPLNLSKKSPTPPPS  
 KLHALVAAANAVQRYPTLSADVTVTASNGGPPSAAASPAPSSSPPASVGSPPNGLSAAVHKVMLEA

>Q76FN2\_RAT

MTATLTLETMTSEEEYGPRNCVVCGRATGYHFHALTCEGCKGFFRRTVSKTIGPICPFAGRCEVSKAQR  
 RHCAPACRLQKCLNVGMRKDMILSAEALALRRARQARRRAQKASLQLSQQKELIQTLGHAHTRHVGPMFD  
 QFVQFRPPAYLFSHHRPFQPLAPVLPVTHFADINTFMVQQIIFKFTKDLPLFRSLTMEDQISLLKGAAVE  
 ILHISLNTTFCLQTQNFCLGPLYCYKMEDAVHGETVVQNTVCTLWYEVWSNGQEAQAQPTISHSRVVRVFG  
 VDHPLPQNPEKIAAPGARVCAHGCHGSLLS

## (2) 127 NR2

>RXRA\_RAT

MDTKHFLPLDFSTQVNSSSLSSPTGRGSMAPSLHPSLGPGLGSPGSPQLHSPISTLSSPINGMGPPF  
 SVISSPMGPHSMSVPTPTLGFETGSPQLNSPMNPVSSSEDIKPPPLGVLKVPAPHSNGMSSFTKHIC  
 AICGDRSSGKHYGVSCEGCKGFFKRTVRKDLTYTCRDNKDCLIDKRQRNRCQYCRYQKCLAMGMKREAV  
 QEERQRGKDRNENEVESTSSANEDMPVEKILEAEAVEPKTETTYVEANMGLNPSSPNDPVTNICQAADKQ  
 LFTLVEWAKRIPHSELPLDDQVILLRAGWNEILLASFSHRSIAVKDGILLATGLHVHRNSAHSAGVGA

FDRVLTELVSKMRDMQMDKTELGLCLRAIVLFPNPSKGLSNPAEVEALREKVYASLEAYCKHKYPEQPGRF  
AKLLLRLPALRSIGLKCLEHLFFFKLIGDTPIDTFLMEMLEAPHQTT

>RXRA\_MOUSE

MDTKHFLPLDFSTQVNSSSLNSPTGRGSMVPSLHPSLPGIGSPLGSPQLHSPISTLSSPINGMGPPF  
SVISSPMGPHSMSVPTTPTLGFGTGSPQLNSPMNPVSSSTEDIKPLGLNGVLKVPAPHPSGNMASFTKHIC  
AICGDRSSGKHYGVSCEGCKGFFKRTVRKDLTYTCRDNKDCLIDKRQRNRCQYCRYQKCLAMGMKREAV  
QEERQRGKDRNENEVESTSSANEDMPVEKILEAELAVEPKTETTYVEANMGLNPSSPNDPVTNICQAADKQ  
LFTLVEWAKRIPHFSELPLDDQVILLRAGWNELLIASFSHRSIAVKDGIILLATGLHVHRNSAHSAGVGAI  
FDRVLTELVSKMRDMQMDKTELGLCLRAIVLFPNPSKGLSNPAEVEALREKVYASLEAYCKHKYPEQPGRF  
AKLLLRLPALRSIGLKCLEHLFFFKLIGDTPIDTFLMEMLEAPHQAT

>RXRA\_HUMAN

MDTKHFLPLDFSTQVNSSLTSPTGRGSMVPSLHPSLPGIGSPLGSPQLHSPISTLSSPINGMGPPFSVISS  
PMGPHSMSVPTTPTLGFSTGSPQLSSPMNPVSSSEDIKPLGLNGVLKVPAPHPSGNMASFTKHICAICGD  
RSSGKHYGVSCEGCKGFFKRTVRKDLTYTCRDNKDCLIDKRQRNRCQYCRYQKCLAMGMKREAVQEERQ  
RGKDRNENEVESTSSANEDMPVERILEAELAVEPKTETTYVEANMGLNPSSPNDPVTNICQAADKQLFTLV  
EWAKRIPHFSELPLDDQVILLRAGWNELLIASFSHRSIAVKDGIILLATGLHVHRNSAHSAGVGAI  
FDRVLTELVSKMRDMQMDKTELGLCLRAIVLFPNPSKGLSNPAEVEALREKVYASLEAYCKHKYPEQPGRF  
AKLLLRLPALRSIGLKCLEHLFFFKLIGDTPIDTFLMEMLEAPHQMT

>Q5TJF7\_CANFA

MSWAARPPFLPQRHAAGQCGPVGVRKEMHCGVASRWRRRRPWLDPAAAAAAAAAAAGEQQTPEPEPEGEAGR  
DGMGDSGRDSRSPDSSSNPLSQGAPPPSPGLPLPSSAPTLGGSGAPPPPMPPQGLSPFPVVISSSM  
GSPGLPPPAPPFGSPVSSPQINSTVSLPGGGSGPPEDVKPPVLGVRGLHCPPPPGGPGAGKRLCAICGD  
RSSGKHYGVSCEGCKGFFKRTIRKDLTYSCRDNKDCTVDKRQRNRCQYCRYQKCLATGMKREAVQEERQ  
RGKDKDGDGEGAGGAPEEMPVDRIEAELAVEQKSDQGVGEGPGGTGGSGSSPNDPVTNICQAADKQLFTLV  
VEWAKRIPHFSSPLDDQVILLRAGWNELLIASFSHRSIDVRDGIILLATGLHVHRNSAHSAGVGAI  
FDRVLTELVSKMRDMRMDKTELGLCLRAIILFPNDAKGLSNPSEVEVLREKVYASLETYCKQKYPEQQGRFAKLL  
LRLPALRSIGLKCLEHLFFFKLIGDTPIDTFLMEMLEAPHQLA

>RXRB\_MOUSE

MSWATRPPFLPPRHAAGQCGPVGVRKEMHCGVASRWRRRRPWLDPAAAAAAAAAAAGEQQALEPEPEGEAGR  
DGMGDSGRDSRSPDSSSNPLSQGIRPSSPPGPLTPSAPPPMPPPPGLSPFPVVISSSMGSPGLPPPAPP  
SGPVSSPQINSTVSLPGGGSGPPEDVKPPVLGVRGLHCPPPPGGPGAGKRLCAICGDRSSGKHYGVSCE  
GCKGFFKRTIRKDLTYSCRDNKDCTVDKRQRNRCQYCRYQKCLATGMKREAVQEERQRGKDKDGDGAG  
GAPEEMPVDRIEAELAVEQKSDQGVGEGPAGTGGGGSSPNDPVTNICQAADKQLFTLVEWAKRIPHFSS  
PLDDQVILLRAGWNELLIASFSHRSIDVRDGIILLATGLHVHRNSAHSAGVGAI  
FDRVLTELVSKMRDMRMDKTELGLCLRAIILFPNDAKGLSNPGEVEILREKVYASLETYCKQKYPEQQGRFAKLL  
LRLPALRSIGLKCLEHLFFFKLIGDTPIDTFLMEMLEAPHQLA

>Q6LC96\_MOUSE

MAVPSLHPSLPGIGSPLGSPQLHSPISTLSSPINGMGPPFSVISSPMGPHSMSVPTTPTLGFGTGSPQ  
LNSPMNPVSSSTEDIKPLGLNGVLKVPAPHPSGNMASFTKHICAICGDRSSGKHYGVSCEGCKGFFKRTV

RKDLTYTCRDNKDCLIDKRQRNRCQYCRYQKCLAMGMKREAVQEERQRGKDRNENEVESTSSANEDMPVE  
 KILEAEALAVEPKTETYVEANMGLNPSSPNDPVTNICQAADKQLFTLVEWAKRIPHFSELPLDDQVILLRA  
 GWNELLIASFHRSAVKDGIILLATGLHVHRNSAHSAGVGAI FDRVLTELVS KM RDMQMDKTELGLCLRAI  
 VLFNPD SKGLSNPAEVEALREKVYASLEAYCKHKYPEQGRFAKLLRLPALRSIGLKCLEHLFFFKLI  
 GDTPIDTFLMEMLEAPHQAT

>Q6MGB3\_RAT

MGDSGRDSRSPDSSSNPLSQGIPSSPPGPPHTPSAPPPMPPPLGSPFPVISSSMGSPGLPPPAPPG  
 FSGPVSSPQINSTVSLPGGGSGPPEDVKPPVLGVRGLHCPPPPGGPGAGKRLCAICGDRSSGKHYGVS  
 CEGCKGFFKRTIRKDLTYSCRDNKDCTVDKRQRNRCQYCRYQKCLATGMKREAVQEERQRGKDKDGDG  
 DGA GGAP EEMPVDRI LEAEALAVEQKSDQGVGPGGTGGSGSSPNDPVTNICQAADKQLFTLVEWAKRIP  
 HFSS LPLDDQVILLRAGWNE LLIASFHRSIDVRDGIILLATGLHVHRNSAHSAGVGAI FDRVLTELVS  
 KM RDMR MDKTELGLCLRAI I LFNPD AKGLSNPGEVEILREKVYASLEAYCKHKYPEQGRFAKLLRL  
 PALRSIGLKCLEHLFFFKLI GDTPIDTFLMEMLEAPHQLA

>RXRG\_MOUSE

MYGNYSHFMKFPTGFGGSPGHTGSTSMSPSVALPTGKPMDSHPSYTDTPVSAPRTLSAVGTPLNALGSPY  
 RVITSAMGPPSGALAAPPGINLVAPPSSQLNVVNSVSSSEDIKPLPGLPGIGNMNPSTSPGSLVKHICA  
 ICGDRSSGKHYGVSCEGCKGFFKRTIRKDLIYTCRDNKDCLIDKRQRNRCQYCRYQKCLVMGMKREAVQ  
 EERQRSRERA ESEAECASSHEDMPVERILEAEALAVEPKTESYGD MNVENSTNDPVTNICHAADKQLFTL  
 VEWAKRIPHFSDLTLEDQVILLRAGWNE LLIASFHRSVSVQDGIILLATGLHVHRSSAHSAGVGSIFDRV  
 LTELVSKMKDMQMDKSELGLCLRAI VLFNPD AKGLSNPSEVETLREKVYATLEAYTKQKYPEQGRFAKLL  
 LRLPALRSIGLKCLEHLFFFKLI GDTPIDSFLEMEMLETP LQIT

>RXRG\_HUMAN

MYGNYSHFMKFPAGYGGSPGHTGSTSMSPSAALSTGKPMDSHPSYTDTPVSAPRTLSAVGTPLNALGSPY  
 RVITSAMGPPSGALAAPPGINLVAPPSSQLNVVNSVSSSEDIKPLPGLPGIGNMNPSTSPGSLVKHICA  
 ICGDRSSGKHYGVSCEGCKGFFKRTIRKDLIYTCRDNKDCLIDKRQRNRCQYCRYQKCLVMGMKREAVQ  
 EERQRSRERA ESEAECATSGHEDMPVERILEAEALAVEPKTESYGD MNMENSTNDPVTNICHAADKQLFTL  
 VEWAKRIPHFSDLTLEDQVILLRAGWNE LLIASFHRSVSVQDGIILLATGLHVHRSSAHSAGVGSIFDRV  
 LTELVSKMKDMQMDKSELGLCLRAI VLFNPD AKGLSNPSEVETLREKVYATLEAYTKQKYPEQGRFAKLL  
 LRLPALRSIGLKCLEHLFFFKLI GDTPIDTFLMEMLETP LQIT

>Q5REL6\_PONPY

MYGNYSHFMKFPAGYGGSPGHTGSTSMSPSAALSTGKPMDSHPSYTDTPVSAPRTLSAVGTPLNALGSPY  
 RVITSAMGPPSGALAAPPGINLVAPPSSQLNVVNSVSSSEDIKPLPGLPGIGNMNPSTSPGSLVKHICA  
 ICGDRSSGKHYGVSCEGCKGFFKRTIRKDLIYTCRDNKDCLIDKRQRNRCQYCRYQKCLVMGMKREAVQ  
 EERQRSRERA ESEAECASSGHEDMPVERILEAEALAVEPKTESYGD MNMENSTNDPVTNICHAADKQLFTL  
 VEWAKRIPHFSDLTLEDQVILLRAGWNE LLIASFHRSVSVQDGIILLATGLHVHRSSAHSAGVGSIFDRV  
 LTELVSKMKDMQMDKSELGLCLRAI VLFNPD AKGLSNPSEVETLREKVYATLEAYTKQKYPEQGRFAKLL  
 LRLPALRSIGLKCLEHLFFFKLI GDTPIDTFLMEMLETP LQIT

>RXRA\_XENLA

MSSAAMDTKHFLPLGGRTCADTLRCTTSWTAGYDFSSQVNSSSLSSSGLRGSMTAPLLHPSLGN SGLNNS

LGSPTQLPSPLSSPINGMGPFFSVISPLGPSMAIPSTPGLGYGTGSPQIHSPMNSVSSSTEDIKPPPGIN  
 GILKVPMHPSGAMASFTKHICAICGDRSSGKHYGVYSCEGCKGFFKRTVRKDLTYTCRDSKDCMIDKRQR  
 NRCQYCRYQKCLAMGMKREAVQEERQRGKERNENEVESSNSANEDMPVEKILEAEHAVEPKTETYTEAMM  
 GLAPNSPSPDVTNICQAADKQLFTLVEWAKRIPHFSELPDQVILLRAGWNEILLIASFSHRSIIVKDGIL  
 LLATGLHVHRNSAHSAGVGAI FDRVLTELVS KM RDMQMDKTELGLCLRAIVLFNPD SKGLSNPLEVEALRE  
 KVIYASLEAYCKQKYPEQPGRFAKLLLRLPALRSIGLKCLEHLFFFKLIGDTPIDTFLMEMLEAPHQMT

>7UP1\_DROME

MCASPSTAPGFFNPRPQSGAELSAFDIGLSRSMGLGVPPHSAWHEPPASLGGHLLHAASAGPGTTTGSVAT  
 GGGGTTTPSSVASQQSAVIKQDLSCPSLNQAGSGHHPGIKEDLSSSLPSANGGSAGGHSGSGSGSGSVN  
 PGHGSMDMLPLIKGHGQDMLTSIKGQPTGCGSTTPSSQANSSHSQSSNSGSQIDSKQNIIECVCGDKSSGK  
 HYGQFTCEGCKSFFKRSVRRNLTYSCRGRNCPIDQHHRNQCYCRLKKCLKMGMRREAVQRGRVPPTQP  
 GLAGMHGQYQIANGDPMGIAGFNGHSYLSYISLLLRAEPYPTSRYGQCMQPNNIMGIDNICELAARLLF  
 SAVEWAKNIPFFPELQVTDQVALLRLVWSELVFNASQCSMPLHVAPLLAAAGLHASPMAADRVAFMDH  
 IRIFQEQVEKALKALHVDSAEYSCLKAIVLFTTDACGLSDVTHIESLQEKSQCALEEYCRTQYPNQPTRFG  
 KLLLRLPSLRTVSSQVIEQLFFVRLVGKTPIETLIRDMLLSGNSFSWPYLPSM

>RXRG\_CHICK

MYGNYPHFIKFPAGFGNSPVHASSTSVSPSSSLSVGSTVDGHHNYLEAPTNASRALPSPMNTIGSPVNAL  
 GSPYRVIASSIGSHVALSSSAPGMNFVTHSPQPNVNLNNVSSSEDIKPLPGLPGIGMNYPSTSPGSLAK  
 HICAICGDRSSGKHYGVYSCEGCKGFFKRTIRKDLIYTCRDNKDCLIDKRQRNRCQYCRYQKCLAMGMKR  
 EAVQEERQGSRRERSENEAESTSGGSEDMVERILEAEALAVEPKTEAYSDVNTESSNDPVTNICHAADKQ  
 LFTLVEWAKRIPHFSDLTLEDQVILLRAGWNEILLIASFSHRSVSVQDGILLATGLHVHRSSAHSAGVSI  
 FDRVLTELVS KM RDMQMDKSELGLCLRAIVLFNPD AKGLSSPSEVESLREKVYATLEAYTKQKYPEQPGRF  
 AKLLLRLPALRSIGLKCLEHLFFFKLIGDTPIDTFLMEMLETPLQVT

>RXRB\_BRARE

MGDSRDRSPDSSSVSSPPSGQRSPPLAPSAAAMTSLPPIITSAVNSPISSMGSPFVIVSSSLGSPCLPGT  
 PSVGYGPISSPQINSTVMSGLHAVSSDDVKPPFGLKPLSSHSPGPMVSQKRLCAICGDRSSGKHYGVY  
 SCEGCKGFFKRTVRKDLSTYTCRDNKDCLVDKRQRNRCQYCRYQKCLAMGMKREVVQDERQRSVQEERQRN  
 KERDGEVESSAANEEMPVEKILEAEMAVEQKTELHADGSSGGSSPNDPVTNICQAADKQLFTLVEWAKR  
 IPHFSELSLDDQVILLRAGWNEILLIASFSHRISITVKDGILLATGLHVHRNSAHSAGVGAI FDRSAHNAE  
 VGAI FDRVLTELVS KM RDMQMDKTELGLCLRAIILFNPD AKGLSSPSEVELLREKVYASLEAYCKQRYPDQ  
 QGRFAKLLLRLPALRSIGLKCLEHLFFFKLIGDTPIDTFLMEMLEAPHQLT

>Q6INZ0\_XENLA

MGDSRVCQSPDTSLSPLGHSFSDTPPPPSAPLHPSMVGSAAMTSSVNSPLGSIGSPFPVINCSVGSPI  
 PGTPSIGYGPVSSPQINSTVNL SGLHHVGSSE DVKPPGLMRMQSHPNGGTVSGKRLCAICGDRSSGKHY  
 GVHSCEGCKGFFKRTIRKDLTYTCRDSKDCIVDKRQRNRCQYCRYQKCLATGMKREAVQEERQRGRERDQ  
 EAELSGAINEEMPVEKILEAEALAVEQKSDQSLEGGGSPSDPVTNICQAADKQLFTLVEWAKRIPHFSELP  
 LDDQVILLRAGWNEILLIASFSHRISVKGILLATGLHVHRNSAHSAGVGAI FDRVLTELVS KM RDMRMD  
 KTELGLCLRAIILFNPD AKGLSNPGDVEVLREKVYASLESYCKQKYPDQGRFAKLLLRLPALRSIGLKL  
 EHLFFFKLIGDTPIDTFLMEMLEAPHQLS

>Q91613\_XENLA

MGDSRVCQSPDTSSLSPLGHSFSDTPPPPSAPLHPSMVGSAMTSSVNSPLGSIGSPFPVINCSVGSPI  
 PGTPSIGYGPVSSPQINSTVNLSGLHHVGSSEVDKPPPLGMRSMQSHPNGGTVSGKRLCAICGDRSSGKHY  
 GVHSCGCKGFFKRTIRKDLTYTCRDSKDCIVDKRQRNRCQYCRYQKCLATGMKREAVQEERQRGRERDQ  
 EAELSGAINEEMPVEKILEAELAVEQKSDQSLEGGGSPSPDVTNICQDADKQLFTLVEWAKRIPHFSELP  
 ELPLDDQVILLRAGWNELLIASFHRISSEKDGILLATGLHVHRNSAHSAGVGAI FERVLTTELVS KM RDM  
 RMDKTELGLCLRAIILFNPDAGLSNPGDVEVLREKVYACLESYCKQKYPDQQGRFAKLLRLPALRSIGL  
 KCLEHLFFFKLIGDTPIDTFLMEMLEAPHQLS

>RXRA\_BRARE

MDNNDTYLHLSSSLQVAHGLSSPPSQPPLSSMVSHHPSIINGLSPYSVITSSSLGSPSASMPTTSM  
 GYGALNSPQMNSLNSVSSSEDIKPPPGLAGLSYPCGSPGSLSKHICAICGDRSSGKHYGVYSCGCKGF  
 FKRTIRKDLTYTCRDNKDCQIDKRQRNRCQYCRYQKCLAMGMKREAVQEERQRGRERSDNEVDSSSSFNE  
 EMPVEKILDAELAVEPKTEAYMESSMSNSTNDPVTNICQAADKQLFTLVEWAKRIPHFSDLPLDDQVILL  
 RAGWNELLIASFHRSVTVKDGILLATGLHVHRSSAHSAGVGSIFDRVLTTELVS KM RDMQMDKTELGLCL  
 AIVLFNPDAGLSNPGDVEVLREKVYASLEGYTKHNYPDQPGRFAKLLRLPALRSIGLKCLEHLFFFKL  
 IGDTPIDTFLMEMLEAPHQIT

>Q86GV5\_BRAFL

MAMAVSTWREPGE DLSSPDKQQQQQPVPAVPVPGPGPQQPPPSQPPGQTQQSTPGPQQPGPPTPNQQT  
 PNG  
 GSMPQQTPTAPTQSSQQGQQSTPTSGGQSQHIECVVCGDKSSGKHYGQFTCEGCKSFFKRSVRRNLTY  
 SCRGNRTCPIDQHHRNQCYCRLKKCLKMGMRREAVQRGRIPPTQHPAGA QYALTNGVDPINGHSYLSGY  
 ISLLLRAEYPYTSRYGTQCMQPNNIMGIDNICELAAARLLFSAVEWARNIPYFPELQVTDQVALLRLVWSE  
 LFLVNASQCSMPLHVAPLLAAAGLHASPMSADRVAFM DHIRIFQEQVEK LKALHVDSAEYSCLKAI VLF  
 TSDACGLS DAAHIDSLQEKSQCALEEYVRSQYPNQPTRFGKLLRLPSLRTVSSSVIEQLFFVRLVGKTP  
 IETLIRDMLLSGSSFNWPYMSIQ

>COT1\_MOUSE

MAMVVSSWRDPQDDVAGGNPGGPNPAAQAARGGGGAGEQQQAGSGAPHTPQTTPGQPGAPATPGTQGDKG  
 QGPPGSGQSQQHIECVVCGDKSSGKHYGQFTCEGCKSFFKRSVRRNLTYTCRANRNCPIDQHHRNQCYC  
 RLKKCLKVGMRREAVQRGRMPPTQPNPGQYALTNGDPLNGHCYLSGYISLLLRAEYPYTSRYGSQCMQP  
 NIMGIENICELAAARLLFSAVEWARNIPFFPDLQITDQVSLRLTWSELFVLNAAQCSMPLHVAPLLAAAG  
 LHASPMSADRVAFM DHIRIFQEQVEK LKALHVDSAEYSCLKAI VLF TSDACGLS DAAHIESLQEKSQCA  
 LEEYVRSQYPNQPSRFGKLLRLPSLRTVSSSVIEQLFFVRLVGKTP IETLIRDMLLSGSSFNWPYMSIQ  
 CS

>COT1\_HUMAN

MAMVVSSWRDPQDDVAGGNPGGPNPAAQAARGGGGAGEQQQAGSGAPHTPQTTPGQPGAPATPGTAGDK  
 GQPPGSGQSQQHIECVVCGDKSSGKHYGQFTCEGCKSFFKRSVRRNLTYTCRANRNCPIDQHHRNQCYC  
 CRLKKCLKVGMRREAVQRGRMPPTQPNPGQYALTNGDPLNGHCYLSGYISLLLRAEYPYTSRYGSQCMQP  
 NNIMGIENICELAAARLLFSAVEWARNIPFFPDLQITDQVSLRLTWSELFVLNAAQCSMPLHVAPLLAAAG  
 LHASPMSADRVAFM DHIRIFQEQVEK LKALHVDSAEYSCLKAI VLF TSDACGLS DAAHIESLQEKSQCA  
 ALEEYVRSQYPNQPSRFGKLLRLPSLRTVSSSVIEQLFFVRLVGKTP IETLIRDMLLSGSSFNWPYMSI  
 QCS

>COT1\_BOVIN

MAMVVSSWRDPQDDVAGGNPGGPNPAAQAARGGGGAGEQQQQAGSGAPHTPQTPGQPGAPATPGTAGD  
 KGQGGPPGSGQSQQHIECVVCGDKSSGKHYGQFTCEGCKSFFKRSVRRNLTYTCRANRNCPIDQHHRNQCQ  
 YCRLKKCLKVGMRRREAVQRGRMPPTQPNPGQYALTNGDPLNGHCYLSGYISLLLRAEPYPTSRYGSQCMQ  
 PNNIMGIENICELAAARLLFSAVEWARNIPFFPDLQITDQVSLRLTWSELFLVNAQAQCSMPLHVAPLLAA  
 AGLHASPMSADRVAFMDHIRIFQEQVEKALKALHVDSA EYSCLKAIVLFTSDACGLSDAAHIESLQEKSQ  
 CALEEYVRSQYPNQPSRFGKLLLRSLRTVSSSVIEQLFFVRLVGKTPIETLIRDMLLSGSSFNWPYMS  
 IQCS

>Q62681\_RAT

MAMVVSSWRDPQDDVAGGNPGGPNPAAQAARGGGGGEQQQAGSGAPHTPQTPGQPGAPATPGTAGDKGQG  
 PPGSGQSQQHIECVVCGDKSSGKHYGQFTCEGCKSFFKRSVRRNLTYTCRANRNCPIDQHHRNQCQYCR  
 LKKCLKVGMRRREAVQRGRMPPTQPNPGQYALTNGDPLNGHCYLSGYISLLLRAEPYPTSRYGSQCMQPN  
 NIMGIENICELAAARLLFSAVEWARNIPFFPDLQITDQVSLRLTWSELFLVNAQAQCSMPLHVAVLAAAGL  
 HASPMSADRVAFMDHIRIFQEQVEKALKALHVDSA EYSCLKAIVLFTSDACGLSDAAHIESLQEKSQCAL  
 EEEYVRSQYPNQPSRFGKLLLRSLRTVSSSVIEQLFFVRLVGKTPIETLIRDMLLSGSSFNWPYMSIQCS

>Q6DHP9\_BRARE

MDTHDYLHLHSSPLNSSPSQPPVMSSMVGHPVSISSSRPLPSPMSTLGSSMNGLPSPYSVITPSLSSPS  
 ISLPSTPSMGFNTLNSPQMNSLSMNGNEDIKPPPGPLAPLGNMSSYQCTSPGSLSKHICAICGDRSSGKHY  
 GVYSCEGCKGFFKRTIRKDLTYTCRDIKECLIDKRQRNRCQYCRYQKCLAMGMKREAVQEERQRGKEKSD  
 TEVETTSRFNEDMPVDKILDAELSVEPKTETYTESSPSNSTNDPVTNICHAAADKQLFTLVEWAKRIPHFS  
 DLPLDDQVILLRAGWNEILLIASFSHRISITVKDGILLGTGLHVHRSSAHSAGVGSIFNRVLTELVSMMKDM  
 QMDKTELGLCLRAIVLFPDAKGLSNSLEVEALREKVYASLETYTKQKYPDQGRFAKLLLRPALRSIGL  
 KCLEHLFFFKLIGDTPIDTFLMEMLEAPHQIT

>COT2\_BOVIN

MAMVVSTWRDPQDEVPGSQGSQASQAPPVPGPPPAPHTPQTPGQGGPASTPAQTAAGGQGGPGGPGSDK  
 QQQQQHIECVVCGDKSSGKHYGQFTCEGCKSFFKRSVRRNLSYTCRANRNCPIDQHHRNQCQYCRLLKCL  
 KVGMRREAVQRGRMPPTQPSHGQFALTNGDPLNCHSYLSGYISLLLRAEPYPTSRFGSQCMQPNNIMGIE  
 NICELAAARMLFSAVEWARNIPFFPDLQITDQVALLRLTWSELFLVNAQAQCSMPLHVAPLLAAAGLHASP  
 M SADRVAFMDHIRIFQEQVEKALKALHVDSA EYSCLKAIVLFTSDACGLSDVAHVESLQEKSQCALEEYV  
 R SQYPNQPTRFGKLLLRSLRTVSSSVIEQLFFVRLVGKTPIETLIRDMLLSGSSFNWPYMAIQ

>COT2\_HUMAN

MAMVVSTWRDPQDEVPGSQGSQASQAPPVPGPPPAPHTPQTPGQGGPASTPAQTAAGGQGGPGGPGSDK  
 QQQQQHIECVVCGDKSSGKHYGQFTCEGCKSFFKRSVRRNLSYTCRANRNCPIDQHHRNQCQYCRLLKCL  
 KVGMRREAVQRGRMPPTQPTHGQFALTNGDPLNCHSYLSGYISLLLRAEPYPTSRFGSQCMQPNNIMGIE  
 NICELAAARMLFSAVEWARNIPFFPDLQITDQVALLRLTWSELFLVNAQAQCSMPLHVAPLLAAAGLHASP  
 M SADRVAFMDHIRIFQEQVEKALKALHVDSA EYSCLKAIVLFTSDACGLSDVAHVESLQEKSQCALEEYV  
 R SQYPNQPTRFGKLLLRSLRTVSSSVIEQLFFVRLVGKTPIETLIRDMLLSGSSFNWPYMAIQ

>COT2\_MOUSE

MAMVVSTWRDPQDEVPGSQSQASQAPPVPGPPPAPHTPQTPGQGGPASTPAQTAAGGQGGPGGPGSDK  
 QQQQQHIECVVCGDKSSGKHYGQFTCEGCKSFFKRSVRRNLSYTCRANRNCPIDQHHRNQCQYCRLLKCL  
 KVMRREAVQGRMPPTQPTHGQFALTNGDPLNCHSYLSGYISLLLRAEPYPTSRFGSQCMQPNNIMGIE  
 NICELAARMLFSAVEWARNIPFFPDLQITDQVALLRLTWSELFVLNAAQCSMPLHVAPLLAAAGLHASPM  
 SADRVAFMDHIRIFQEQVEKALKALHVDSA EYSCLKAIVLFTSDACGLSDVAHVESLQEKSQCALEEYVR  
 SQYPNQPTRFGKLLLRSLRVTSSSVIEQLFFVRLVGKTP IETLIRDMLLSGSSFNWPYMAIQ

>COT2\_RAT

MAMVVSTWRDPQDEVPGSQSQASQAPPVPGPPPAPHTPQTPGQGGPASTPAQTAAGSQQGGPGGPGSDK  
 QQQQQHIECVVCGDKSSGKHYGQFTCEGCKSFFKRSVRRNLSYTCRANRNCPIDQHHRNQCQYCRLLKCL  
 KVMRREAVQGRMPPTQPTHGQFALTNGDPLNCHSYLSGYISLLLRAEPYPTSRFGSQCMQPNNIMGIE  
 NICELAARMLFSAVEWARNIPFFPDLQITDQVALLRLTWSELFVLNAAQCSMPLHVAPLLAAAGLHASPM  
 SADRVAFMDHIRIFQEQVEKALKALHVDSA EYSCLKAIVLFTSDACGLSDVAHVESLQEKSQCALEEYVR  
 SQYPNQPTRFGKLLLRSLRVTSSSVIEQLFFVRLVGKTP IETLIRDMLLSGSSFNWPYMAIQ

>NR2F1\_BRARE

MAMVSVWRDPQEDVAGGPPSGPNPAAQPAEQQAASAAPHTPQTPSQPGPPSTPGTAGDKGSQNSGQS  
 QQHIECVVCGDKSSGKHYGQFTCEGCKSFFKRSVRRNLTYTCRANRNCPIDQHHRNQCQYCRLLKCLKVG  
 MRREAVQGRMPPTQPNPGQYALTNGDPLNGHCYLSGYISLLLRAEPYPTSRYGSQCMQPNNIMG IENIC  
 ELAARLLFSAVEWARNIPFFPDLQITDQVSLRLTWSELFVLNAAQCSMPLHVAPLLAAAGLHASPMSAD  
 RVVAFMDHIRIFQEQVEKALKALHVDSA EYSCIKAIVLFTSDACGLSDAAHIESLQEKSQCALEEYVRSQY  
 PNQPSRFGKLLLRSLRVTSSSVIEQLFFVRLVGKTP IETLIRDMLLSGSSFNWPYMSIQ

>Q91430\_BRARE

MAMVVWRGSQDDVAETHGTLSSQTQGGLSLPTPQPGQLGLTASQVAPPTPQTPVQGPNNNNNTQSTPTN  
 QTTQSQSEKQQQHIECVVCGDKSSGKHYGQFTCEGCKSFFKRSVRRNLTYTCRANRNCPIDQHHRNQCQ  
 YCRLLKCLKVGMREAVQGRMPPTQPHHGQFALTNGDPLHCHSYLSGYISLLLRAEPYPTSRYGSQCMQ  
 PNNIMG IENICELAARMLFSAVEWARNIPFFPDLQITDQVALLRLTWSELFVLNAAQCSMPLHVAPLLAA  
 AGLHASPMSADRVAFMDHIRIFQEQVEKALKALHVDSA EYSCLKAIVLFTSDACGLSDVAHVESLQEKSQ  
 CALEEYVRSQYPNQPTRFGKLLLRSLRVTSSSVIEQLFFVRLVGKTP IETLIRDMLLSGSSFNWPYMS  
 IQ

>Q6PHF2\_BRARE

MAMVSVWRDPQEDVAGGPPSGPNPAAQPAEQQAASAAPHTPQTPSQPGPPSTPGTAGDKGSQNSGQS  
 QQHIECVVCGDKSSGKHYGQFTCEGCKSFFKRSVRRNLTYTCRANRNCPIDQHHRNQCQYCRLLKCLKVG  
 MRREVQGRMPPTQPNPGQYALTNGDPLNGHCYLSGYISLLLRAEPYPTSRYGSQCMQPNNIMG IENICE  
 LAARLLFSAVEWARNIPFFPDLQITDQVSLRLTWSELFVLNAAQCSMPLHVAPLLAAAGLHASPMSADR  
 VVAFMDHIRIFQEQVEKALKALHVDSA EYSCIKAIVLFTSDACGLSDAAHIESLQEKSQCALEEYVRSQYP  
 NQPSRFGKLLLRSLRVTSSSVIEQLFFVRLVGKTP IETLIRDMLLSGSSFNWPYMSIQ

>Q9W745\_XENLA

MAMVVSSWRDPQEDVAGGNPGGPNPGVREQQQAPSAAAPHTPQTPSQPGPPSTPGAAGDKGQQGSGSQSQQ  
 HIECVVCGDKSSGKHYGQFTCEGCKSFFKRSVRRNLTYTCRANRNCPIDQHHRNQCQYCRLLKCLKVGM  
 REAVQGRMPPTQPNPGQYALTNGDPLNGHCYLSGYISLLLRAEPYPTSRYGSQCMQPNNIMG IENICEL



AARLLFSAVEWARNIPFFPDLQITDQVALLRLTWSELFLVNAQAQCSMPLHVAPLLAAAGLHASPMSADRV  
 VAFMDHIRIFQEQVEKALKALHVDSA EYSCIKAIVLFTSDACGLSDAAHIESLQEKSQCALEEYVRSQYPN  
 QPSRFGKLLLRPLSLRTVSSSVIEQLFFVRLVGKTP IETLIRDMLLSGSSFNWPYMPIQCS

>Q91840\_XENLA

MVGSAMTSSVNSPLG SIGSPFPVINC SVGSPGIPGTPSIGYGPVSSPQINSTVNLSGLHSVSSSEDVKPP  
 LGMRSMPSHPNGGAVSGKRLCAICGDRSSGKHYGVYSCEGCKGFFKRTIRKDLTYTCRDSKDCIVDKRQR  
 NRCQYCRYQKCLATGMKREAVQEERQRGKERDGEAELSGAINEEMPVEKILEAELAVEQKSDQSLEGGGS  
 PSDPVTNICQAADKQLFTLVEWAKRIPHFSELALDDQVILLRAGWNELLIASFSHRISVKG DILLATGL  
 HVHRNSAHSAGVGAIFDRVLTELVS KM RDMRMDKTELGC LRAIILFNPDAGLSNPGDVEVLREKVYASL  
 ESYCKQKYPDQQGRFAKLLLRPALRSIGLKCLEHLFFFKLIGDTPIDTFLMEMLEAPHQLS

>Q8T5C6\_BIOGL

MDRSEGMDTLENSMPSGMSGMTMGGHQGHPPDIKPDISSLTSPSTHGYGFGPGGMPMASSTQPSP  
 GPQQMHSPGMHSPTSSMGSPMLCLSPSGPSPSPGLPHSSLHTKHICAICGDRASGKHYGVYSCEGCKGF  
 FKRTVRKDLTYACRDDKNMIDKRQRNRCQYCRYMKCLSMGMKREAVQEERQRVKEKGDGEVESTSGANN  
 DMPVEQILEAELAVDPKIDTYIDAQKDPVTNICQAADKQLFTLVEWAKRIPHFTELPLEDQVILLRAGWN  
 ELLIAGFSHRISIMAKDGILLATGLHVHRSSAHQAGVGTIFDRVLTELVA KM RDMKMDKTELGC LRAVVLV  
 NPDAGLTA VQEVEQLREKVYASLEEYTKSRYPEEPGRFAKLLLRPALRSIGLKCLEHLFFFKLIGDQP  
 IDTFLMEMLENPSPAT

>COT2\_CHICK

MAMVVGAWRDPQDDVPGAQGTQPAPAPPVQGPAGTPHTPQTTPGPGGPPSTPAQSNAASQQSQGDKQQQQ  
 QHIECVVCGDKSSGKHYGQFTCEGCKSFFKRSVRRNLSYTCRANRNCPI DQHHRNQCYCRLKCKLVGM  
 RREAVQRGRMPPTQPTHGQFALTNGDPLNCHSYLSGYISLLLRAEPYPTSRFGSQCMQPNNIMGIENICE  
 LAARMLFSAVEWARNIPFFPDLQITDQVALLRLTWSELFLVNAQAQCSMPLHVAPLLAAAGLHASPMSADR  
 VVAFMDHIRIFQEQVEKALKALHVDSA EYSCIKAIVLFTSDACGLSDVAHVESLQEKSQCALEEYVRSQYP  
 NQPTRFGKLLLRPLSLRTVSSSVIEQLFFVRLVGKTP IETLIRDMLLSGSSFNWPYMSIQ

>Q6DCH6\_XENLA

MAMVVGWRDPQEDVAGGNPGGPNPGVREQQQAPSAAHPTPQTPSQPGPPSTPGAAGDKTGQSQHIECVV  
 CGDKSSGKHYGQFTCEGCKSFFKRSVRRNLT YTCRANRNCPI DQHHRNQCYCRFKKCKLVGMRREVQRG  
 RMPPTQP NPGQYALTNGDPLNGHCYLSGYISLLLRAEPYPTSRYGSQCMQPNNIMGIENICE LAARLLFS  
 AVEWARNIPFFPDLQITDQVALLRLTWSELFLVNAQAQCSMPLHVAPLLAAAGLHASPMSADRVVAFMDHI  
 RIFQEQVEKALKALHVDSA EYSCIKAIVLFTPDACGLSDAAHIESLQEKSQCALEEYVRSQYPNQPSRFGK  
 LLLLRPLSLRTVSSSVIEQLFFVRLVGKTP IETLIRDMLLSGSSFNWPYMPIQCS

>Q8VCR0\_MOUSE

MPPPLGSPFPVISSSMGSPGLPPPAPPFGSPVSSPQINSTVSLPGGGSGPPEDVKPPVLGVRGLHCPP  
 PPGPGGAGKRLCAICGDRSSGKHYGVYSCEGCKGFFKRTIRKDLTYSCRDNKDC TVDKRQRNRCQYCRYQ  
 KCLATGMKREAVQEERQRGKDKDGDGDGAGGAP EEMPVDRI LEAELAVEQKSDQGVGPGATGGGGSSPN  
 DPVTNICQAADKQLFTLVEWAKRIPHFSSLP LDDQVILLRAGWNELLIASFSHRSIDVRDGI LLATGLHV  
 HRNSAHSAGVGAIFDRSLSRVLTELVS KM RDMRMDKTELGC LRAIILFNPDAGLSNPGVEVE I LREKVYA  
 SLETYCKQKYPEQQGRFAKLLLRPALRSIGLKCLEHLFFFKLIGDTPIDTFLMEMLEAPHQLA

>Q7ZXI7\_XENLA

MAMVVGAWRDPQDDMPGSQTTQAPPGPTGAPHTPQTTPGQVPPPTTQAQSNPSSQSSQNQGEKQQQQHIEC  
 VVCGDKSSGKHYGQFTCEGCKSFFKRSVRRNLTYTCRANRNCPIDQHHRNQCQYCRLLKCLKVGMRREAV  
 QRGRMPPTQPTHGQFALTNGDPLNCHSYLSGYISLLLRAEPYPTSRFGSQCMQPNNIMGIENICELAARM  
 LFSAVEWARNIPFFPDLQITDQVALLRLTWSELFVLNAAQCSMPLHVAPLLAAAGLHASPMSADRVVAFM  
 DHIRIFQEQVEKALKALHVDSAEYSCLKAIVLFTSDACGLSDVAHVESLQEKSQCALEEYVRSQYPNQPTR  
 FGKLLLRPLSLRTVSSSVIEQLFFVRLVGKTPIETLIRDMLLSGSSFNWPYMSIQ

>Q9PS79\_9PIPI

MAMVVGAWRDPQDDMPGSQTTQAPPGPTRAPHTPQTTPGQVPPPTTQAQSNPSSQSSQNQGEKQQQQHIEC  
 VVCGDKSSGKHYGQFTCEGCKSFFKRSVRRNLTYTCRANRNCPIDQHHRNQCQYCRLLKCLKVGMRREAV  
 QRGRMPPTQPTHGQFALTNGDPLNCHSYLSGYISLVLRAEPYPTSRFGSQCMQPNNIMGIENICELAARM  
 LFSAVEWARNIPFFPDLQITDQVALLRLTWSELFVLNAAQCSMPLHVAPLSAAAGLHASPMSADRVVAFM  
 DHIRIFQEQVEKALKALHVDSAEYSCLKAIVLFTSDACGLSDVAHVESLQEKSQCALEEYVRSQYPNQPTR  
 FGKLLLRPLSLRTVSSSVIEQLFFVRLVGKTPIETLIRDMLLSGSSFNWPYMSIQ

>Q8UUM6\_ORYLA

MTSLPPISTSGVNSPVSSIGSPFSVISSSLGSPCLPGTPSVGYGPISSPQINSTVMSGLHTVSSSDDVK  
 PPLGLKQLSSHSPGMLSQKRLCSICGDRSSGKHYGVYSCEGCKGFFKRTVRKDLTYTCRDNKCTVDKR  
 QRNRCQYCRYQKCLAMGMKREAVQEERQRNKEREVESTSAVNEEMPVEKILEAEMAVEQKTELHSDGG  
 SGGSSPNPVTNISQAADKQLFTLVWAKRIPHFSELPLDDQVILLRWNEILLIASFSHRISVKGILLA  
 TGLHVHRNSAHSAGVGAI FDRAHNAEVGAI FERVLTELVSKMRDMQMDKTELGLCLRAIILFNPDAKGLSN  
 SSEVELLRERVYASLETYCKHKYPDQQRFAKLLLRPALRSIGLKCLEHLFFFKLIGDTPIDTFMEML  
 EAPHQLT

>RXRD\_BRARE

MNSLPPSTSAVSSPVSSVDSPLSAVSSSIGSPGVPPTPSIGYGPISNSQINSSMSVSRHLHAVSSSDDVKP  
 PFGLKSVSGSPMLSQKRMCAICGDRSSGKHYGVYSCEGCKGFFKRTVRKDLSTCRDNKECLVDKRQRN  
 RCQYCRYQKCLAMGMKREAVQEERQKNKERDGDYECSSSANEEMPVEKILEAETAVEHRTDLHSDATGSP  
 NDPVTNICQAADKQLFTLVWAKRVPHFSDVPLDDQVILLRAGWNEILLIAAFSHRSISVKDEILLATGLH  
 VPKESTHNLGVEAFFDRESSHSAEVGALFDRVLTELVCKMRDMQMDKTELGLCLRAIVLFPDAKGLTSSS  
 EVELLRKRVYASLESYCKQKYPDQQRFAKLLLRPALRSIGLKCLEHLFFFKLIGNTPIDTFMEMLES  
 PH

>Q66TQ0\_9CAEN

MGHQVEACQVAMHMGVPGMGGMGGPHQPDIKPDIISTLNPPSSSTHPGFSYPGYGGMPGMPSSSTQASPGGPN  
 MTSPQMHSPTSSLSPTMMCLSPTGTSSPGMPSGLSKHICICGDRASGKHYGVYSCEGCKGFFKRTVR  
 KDLTYACRDDKNCMIDKRQRNRCQYCRYMKCLAQGMKREAVQEERQRVKEKGDGEVESTSGANSMPVEQ  
 ILEAEIAVEPKIDTYIDAQKEPVTNICQAADKQLFTLVWAKRIPHFVELPLEDQVILLRAGWNEILLIGG  
 FSHRSTQVTDGILLATGLHVHRSSAHQAGVGTIFDRVLTELVAKMREMMDKTELGLCLRAIVLFPDAKGL  
 LQSVQEVEQLREKRVYASLEEYCKQRYPDEPGRFAKLLLRPALRSIGLKCLEHLFFFKLIGQTPIDTFM  
 EMLESPSHPAT

>Q6V7U7\_LOCFI

MEGSEKGISLENNLSISSMGPQSPKMDKPTASLISSGFSFPTGGPNSPGSFTIGHSSLLNNSSSNQAKG  
 SSSQYPPNHPLSGSKHLCSICGDRASGKHYGVYSCGCKGFFKRTVVRKDLASYACREDKNCIIDKRQRNRC  
 QYCRYQKCLAMGMKREAVQEERQRTKERDQNEVESTSSLHTDMPVERILEAEKRVECKAENQVEYESTMN  
 NICQAANICQATNKQLFQLVEWAKHIPHFTSLPLEDQVLLLRAGWNELLIAAFSHRSVDVKDGIIVLATGL  
 TVHRNSAHQAGVGTIFDRVLTTELVAKMREMMDKTELGLCLRSVILFNPEVRGLKSAQEVLELLREKVYAAL  
 EEYTRTTHPDEPGRFAKLLLRPLSLRSIGLKCLEHLFFFRLLIGDVPIDTFLMEMLESPPSDS

>Q66J63\_XENLA

MASIEEIAHQIIEQQMGEISRSHTEVSTALMDGTTQRIQLVPSSESSVSPQRIQIVTDPQTGQKIQIVT  
 ALDQSGTNKQFIFTNNDGSLPSKVILARQDSSQGVFLTPDAAGVNQLFFSTPDVPAHQHIQLSQTSL  
 DQNLNKQFVELCVVCGDKASGRHYGAVTCEGCKGFFKRSIRKNLIYTCRGSKDCVINKHYRNRQYCRLO  
 RCISLGMKQDSVQCERKPIEVSREKSSNCAASTEKIYIRKDLRSPLAATTTFTVTEKTSRRTSLLDSSML  
 VNIQQSGVKNESILLTPNKVEACQGDLSLANVVTSLANLNKSKDLPQNTFEFSIIESLSNGDSSLSDLA  
 QDDQSNSEVTRAFDTLAKALNQSENSTQGSSECVGSGSNLLPDVNVEIEGPLLNDVHIAFRLTMPSPMPE  
 YLNVHYICESASRLLFLSMHWARSIPFSLSLGQENSISLVKACWNEFLSLGLAQCCQVMNVETILAAAFVN  
 HLHNSMQHDKLSSDKVKLVMDHIFKLQEFNCNSMVKRCVDGYEYAYLKAIALFSPDHPGLENVSHIEKLQE  
 KAYMEFQDYVTKTYPEDTYRLSRLRLPALRLNAAITEELFFAGLIGNVQIDSIIPIYLREMTSDYNS  
 QIIIGLTA

>Q91720\_XENLA

MAMVVNPWQEDIPGVPGSQMNNPPGLCNQDPGGTPQTPTPKGGIPGQDPVHSGDKGVPNVDCLVCGDKS  
 SGKHYQFTCEGCKSFFKRSVRRNLTYTCRSNRDCPIDQHHRNQCYCRLKKCLKVGMRREVQRGRMSHP  
 QTSFGQYTLNNDVPYNGHSYLTGFISLLRAEPYPTSRYGACQLQPNNIMGIENICELAAARLLFSAIWA  
 KNIPFFPDFQLSDQVSLLRMTWSELVFNAAQCSMPLHVAPLLARAGLHASPMSADRVVAFMDHIRIFQE  
 QVEKALKALHVDSAEYSCLKAIALFTPDAVGLSDIGHVESIQEKSQCALEEYVRNQYPNQPTRFGRLLRL  
 PSLRIVSAPVIEQLFFVRLVKGKPIETLIRDMLLSGSSFNWPMQ

>Q5RCZ5\_PONPY

MATIEEIAHQIIEQQMGEIVTEQQTGQKIQIVTALDHNTQGKQFILTNDHGSTPSKVILARQDSTPGKVF  
 LTPDAAGVNQLFFTPDLAQHLQLLTDNSSPDQGNKVFVLDLVCVCGDKASGRHYGAVTCEGCKGFFKR  
 SIRKNLVYSCRGSKDCIINKHHRNRQYCRLOQRCIAFGMKQDSVQCERKPIEVSREKSSNCAASTEKIYI  
 RKDLRSPLTATPTFVTDSESTRSTGLLDSGMFVNIHPSGVKTESTVLMTSDKAESCQGDLSLTVVTS  
 ANLGKTKDLSQNSNEMSMIESLSNDDTSLCEFQEMHTNGDVSRAFDTLAKALNPGESTACQSSVAGMEGS  
 VHLITGDSSINYTEKEGPLLSDSHVAFRLTMPSPMPEYLNHYIGESASRLLFLSMHWALSIPSFQALGQ  
 ENSISLVKAYWNEFLTLGLAQCWQVMNVATILATFVNCLHNSLQQDKMSTERRKLLMEHIFKLQEFNCNSM  
 VKLCIDGYEYAYLKAIVLFSPDHPGLENMEQIEKFQEKAYVEFQDYITKTYPDDTYRLSRLRLPALRL  
 MNATITEELFFKGLIGNIRIDSVIPHILKMEPGQYSKTSSL

>Q95K90\_MACFA

MATIEEIAHQIIEQQMGEIVTEQQTGQKIQIVTALDHNTQGKQFILTNDHGSTPSKVILARQDSTPGKVF  
 LTPDAAGVNQLFFTPDLAQHLQLLTDNSSPDQGNKVFVLDLVCVCGDKASGRHYGAVTCEGCKGFFKRS  
 IRKNLVYSCRGSKDCIINKHHRNRQYCRLOQRCIAFGMKQDSVQCERKPIEVSREKSSNCAASTEKIYIR  
 KDLRSPLTATPTFVTDSETRSTGLLDSGMFVNIHPSGVKTESTVLMTSDKAESCQGDLSLTVVTSLSA

NLGKTKDLSQNSNEMSMIESLSNDDTSLCEFQEMQTNQDVSRAFDTLAKALNPGESTACQSSVAGMEGSV  
 HLITGDSSINYTEKEGPLLSDSHVAFRLTMPSPMPEYLVNHYIGESASRLLFLSMHWALSIPSFQALGQE  
 NSISLVKAYWNEFLTGLAQCWQVMNVATILATFVNCLHNSLQQDKMSTERRKLLMEHIFKLQEFNCNSMV  
 KLCIDGYEYAYLKAIVLFSPDHPGLENMEQIEKFQEKAYVEFQDYITKTYPDDTYRLSRLRLPALRLM  
 NATITEELFFKGLIGNIRIDSVIPHILKMEPADYNSQIIGHSI

>RXRG\_BRARE

MPVPEQKQTVQLSSPMNAVSSSEDIKPLGLNGVMKVPAAHRIQTLSSLTKHICAICGDRSSGKHYGVYS  
 CEGCKGFFKRTVRKDLTYTCRDNDKDCMIDKRQRNRCQYCRYQKCLAMGMKREAVQEERQRAKERSEAEFG  
 GCANEDMPVEKILEAEHAVEPKTETTYVEANLSPSANSNDPVTNICQAADKQLFTLVWAKRIPHFSDLP  
 LDDQVILLRAGWNELLIASFSHRSIAVKDGILLATGLHVHRNSAHTAGVGAI FDRVLTLELVSKMRMQMD  
 KTELGCLRAIVLFPDPSKGLSNPSEVEALRERVYASLEAYCKHKYPDQGRFAKLLLRLPALRSIGLKCL  
 EHLFFFKLIGDTPIDTFLMEMLEAPHQIT

>Q15625\_HUMAN

MATIEEIAHQIIEQQMGEIVTEQQTGQKIQIVTALDHNTQGKQFILTNDHGSTPSKVILARQDSTPGKVF  
 LTTTPDAAGVNQLFFTTPLDSAQHLQLLTDNSPDQGNKVFDFLCVVCQDKASGRHYGAVTCEGCKGFFKRS  
 IRKNLVYSCRGSKDCIINKHHRNRCQYCRQLQRCIAFGMKQDSVQCERKPIEVSREKSSNCAASTEKIYIR  
 KDLRSPLTATPTFVTDSESTRSTGLLDSGMFMNIHPSGVKTESAVLMTSDKAESCQGDLSLANVVTSLA  
 NLGKTKDLSQNSNEMSMIESLSNDDTSLCEFQEMQTNQDVSRAFDTLAKALNPGESTACQSSVAGMEGSV  
 HLITGDSSINYTEKEGPLLSDSHVAFRLTMPSPMPEYLVNHYIGESASRLLFLSMHWALSIPSFQALGQE  
 NSISLVKAYWNEFLTGLAQCWQVMNVATILATFVNCLHNSLQQDKMSTERRKLLMEHIFKLQEFNCNSMV  
 KLCIDGYEYAYLKAIVLFSPDHPSLENMELIEKFQEKAYVEFQDYITKTYPDDTYRLSRLRLPALRLM  
 NATITEELFFKGLIGNIRIDSVIPHILKMEPADYNSQIIGHSI

>Q9VLI7\_DROME

MMKHPQDLSVTDDQQLMKVNVKVEKMEQELHDPESHIMHADALASAYPAASQPHSPIGLALS PNGGGGLG  
 LSNSSNQSSNFALCNGNGNAGSAGGGSASSGSSNNNNSMFSPNNNLGSGSGTNSQQQLQQQQQQQSPT  
 VCAICGDRATGKHYGASSCDGCKGFFRRSVRKNHQYTCRFARNCVVDKDRNQCRYCRLRCKFKAGMKKE  
 AVQNERDRISCRRTSNDDPDGNGLSVISLVKAENESRQSKAGAAMEPNINEDLSNKQFASINDVCESMK  
 QQLLTLVEWAKQIPAFNELQLDDQVALLRAHAGEHLLGLSRRSMHLKDVLLLSNNCVITRHCPLVSP  
 NLDISRIGARIIDELVTVMKDVGIDDTEFACIKALVFFDPNAKGLNEPHRIKSLRHQILNNLEDYISDRQ  
 YESRGRFGEILLILPVLQSI TWQMIQIQFAKIFGVAHIDSLQEMLLGGELADNPLPLSPPNQSNQDYQS  
 PTHGTNMEGGNQVNSLDSLATSGGPGSHSLDLEVQHIQALIEANSADDSFRAYAASTAAAAAAVSSSS  
 SAPASVAPASISPLNSPKSQHQHQHATHQQQESSYLDMPVKHYNGSRSGPLPTQHSPQRMHPYQRAV  
 ASPVEVSSGGGGLGLRNPADITLNEYNRSEGSSAEELLRRTPKIRAPEMLTAPAGYGTEPCRMTLKQEP  
 ETGY

>NR2F5\_BRARE

MAMVVNQWQENISADPGSQLQMCSQEPGGTPTGTPSGSTPGNDALSGDKIPNVDCMVCQDKSSGKHYGQFT  
 CEGCKSFFKRSVRRNLSYTCRGNRDCPIDQHRNQCYCRLKCLKVGMRREAVQGRMSNSQSSPGQYL  
 SNGSDPYNGQPYLSGFISLLRAEPYPTSRYGACMQSNNLMGIENICELARLLFSAVEWAKNIPFFPD  
 LQLMDQVALLRMSWSELFVLNAAQCSMPLHVAPLLAAAGLHASPMSAERVVAFMDHIRVFEQVEKLKAL  
 QVDTAEYSCLKSIVLFTSDAMGLSDVAHVESIQEKSQCALEEYVRNQYPNQPNRFRLLLLRLPSLRIVSS

PVIEQLFFVRLVGKTP IETLLRDMLLSGSSYNWPYMPVQRDRPISIHYNENGP

>Q9GSG8\_AEDAE

MLKKEKPMLSVAAI IQAQRWDRTLPLAGLAGFDAALVGHMGFVSPQDMKPDLPDISLLNGSVGFSPG  
 NNCGPASPGAFNQVAAALQQQQQNVNSLNSQQSGGGGAGGGTPTTPTNMSQQYPPNHPLSGSKHLCSI  
 CGDRASGKHYGVYSCEGCKGFFKRTVVRKDLSYACREDKNCTIDKRQRNRCQYCRYQKCLACGMKREAVQE  
 ERQRSSKFSIKSEEINSTSSVRDVTIERIHEAEQLSEQKSGDNAIPYLRVGSNSMIPPEYKGAVSHLCQM  
 VNKQIYQLIDFARRVPHFINLPRDDQVMLLRGWNEMLIAAVAWRSMEYIETERSSDGSRI TVRQPQLMC  
 LGPNFTLHRNSAQQAGVDTLFDRI LCELGIKMKRLDVTRAE LGVLKAIILFNPDIRGLKCQKEIDGMREK  
 IYACLDEHCKQQHPSE DGRFAQLLLRLPALRSISLKC LDHNLNFI RLLSDKHLDSFIVEMLDMP I

>USP\_MANSE

MSSVAKKDKRTMSVTALINRAWPLTPAPHQQQSMPSQPSNFLQPLATPSTTPSVELDIQWLNIEPGFMS  
 PMSPPMKPDTAML DGLRDDSTPPPAFKNYPPNHPLSGSKHLCSICGDRASGKHYGVYSCEGCKGFFKRT  
 VRKDLTYACREDRNCI IDKRQRNRCQYCRYQKCLACGMKREAVQEERQRAARGTEDAHPSSSVQELSIER  
 LLEIESLVADPPEEFQFLRVGPESGVPKYRAPVSSLCQIGNKQIAALVVWARDIPHFGQLELEDQILLI  
 KNSWNELLLLFAIAWRSMEYLTDERENVDSRSTAPPQLMCLMPGMTLHRNSALQAGVGQIFDRVLSELSLK  
 MRTLRMDQAEYVALKAI ILLNPDVKGLKNKPEVVVLEKMFSCLEDEYVRRSRCAEEGRFAALLLRLPALR  
 SISLKC FEHLYFFHLVADTSIASYIHDALRNHAPSIDT SIL

>Q6PH18\_BRARE

MAMVVSARWDPQEELAAVDDQSAAGREHLQHRHSPKSAEKAQIAAQNQQHVECVVCGDKSSGKHYGQFT  
 CEGCKSFFKRSVRRNLSYTCRANRNC PVDQHHRNQCYCRLKKCLKVGMRREAVQRGRMPNPQPNPSHYA  
 LTNGDHLNGQCYLSGYISLLLRAEPYPASRYGNQCMQSGNIMG IENICELAAARLLFS AVEWARNIPFFPD  
 LQITDQVSLRLTWSEL FVLNAAQSSMPLHVAPLLAAAGLHASPMSADRVA FMDHIRFFQE QVEK LKAL  
 QVDSA EYSCAKAIVLFTSDACGLSDIPIHIEGLQEKSQCALEEYVRSQYPNPQPTRFGKLLLRLPALRMVSS  
 SVIEQLFFVRLVGKTP IETLIRDMLLSGSSFNWPYMPIQ

>TR4\_HUMAN

MTSPSPRIQIISTDSAVASPQRIQIVTDQQTGQKIQIVTAVDASGSPKQQFILTSPDGAGTGKVI LASPE  
 TSSAKQLIFTTSDNLVPGRIQIVTDSASVERLLGKTDVQRQPQVVEYCVVCGDKASGRHYGAVSCEGCKGF  
 FKRSVRKNLTYSCRSNQDCI INKHHRNRCQFCRLKKCLEMGMKMSVQSERKPFVDVQREKPSNCAASTEK  
 IYIRKDLRSPLIATPTFVADKDGARQTGLLDPGMLVNIQQPLIREDGTVLLATDSKAETSQ GALGTLANV  
 VTSLANLSESLNNGDTSEIQPEDQSASEITRAFDTLAKALNTDSSSSPSLADGIDTSGGGSIHVISR DQ  
 STPIIEVEGPLLSDTHVTFKLTMPSPMPEYLNHYICESASRLLFLSMHWARSIPAFQALGQDCNTSLVR  
 ACWNEFLTGLAQCAQVMSLSTILAAIVNHLQNSIQEDKLSGDRIKQVMEHIWKLQEFCSMAKLDIDGY  
 EYAYLKAI VLFSPDHPGLTSTSQIEKFQEK AQMELQDYVQKTYSED TYRLARILVRLPALRLMSSNIT EE  
 LFFTGLIGNVSIDSIIPIYILKMETAEYNGQITGASL

>TR4\_MOUSE

MTSPSPRIQIISTDSAVASPQRIQIVTDQQTGQKIQIVTAVDASGSSKQQFILTSPDGAGTGKVI LASPE  
 TSSAKQLIFTTSDNLVPGRIQIVTDSASVERLLGKADVQRQPQVVEYCVVCGDKASGRHYGAVSCEGCKGF  
 FKRSVRKNLTYSCRSSQDCI INKHHRNRCQFCRLKKCLEMGMKMSVQSERKPFVDVQREKPSNCAASTEK  
 IYIRKDLRSPLIATPTFVADKDGARQTGLLDPGMLVNIQQPLIREDGTVLLAADSKAETSQ GALGTLANV

VTSLANLSESLNNGDASEMQPEDQSASEITRAFDTLAKALNTTDSASPPSLADGIDASGGGSIHVISRQ  
 STPIIEVEGPLSDTHVTFKLTMPSPMPEYLNHVHYICESASRLLFLSMHWARSIPAFQALGQDCNTSLVR  
 ACWNEFLTGLAQCAQVMSLSTILAAIVNHLQNSIQEDKLSGDRIKQVMEHIWKLQEFNCNSMAKLDIDGY  
 EYAYLKAIVLFSPDHPGLTGTSTQIEKFQEKQAMELQDYVQKTYSEDYRLARILVRLPALRLMSSNITEE  
 LFFTGLIGNVSIDSIIIPYILKMETAEYNGQITGASL

>Q6P0E6\_BRARE

MAMVVSARWDPQEELAAVDDQSAAGREHLQHRHSPKSAAEKAQIAAQNQHVCEVVCVCGDKSSGKHYGQFT  
 CEGCKSFFKRSVRRNLSYTCRANRNCVVDQHHRNQCYCRLKKCLKVGMRREVQRGRMPPNPNSHYAL  
 TNGDHLNGQCYLSGYISLLLRAEPYPASRYGNQCMQSGNIMGIENICELARLLFSAVEWARNIPFFPDL  
 QITDQVSLRLTWSELVFNAAQSSMPLHVAPLLAAAGLHASPMSADRVVAFMDHIRFFQEVEKALKALQ  
 VDSAIEYSCAKAIVLFTSDACGLSDIPHIEGLQEKSQCALEEYVRSQYPNPQTRFGKLLLRLPALRMVSSS  
 VIEQLFFVRLVGKTPIETLIRDMLLSGSSFNWPMPIQ

>TR4\_RAT

MTSPSPRIQIISTDSAVRSPQRIQIVTDQQTGQKLQIVTAVDASGSSKQOFILTSPDGAGTGKVI LASPE  
 TSSAKQLIFTTSDNLVPGRIQIVTDSASVERLLGKADVQRFPQVVEYCVVCGDKASGRHYGAVSCEGCKGF  
 FKRSVRKNLTYSCRSSQDCIINKHHRNRCQFCRLKKCLEMGMKMSVQSERKPFVQREKPSNCAASTEK  
 IYIRKDLRSPLIATPTFVADKDGSRQTGLLDPGMLVNIQQPLIREDGTVLLATDSKAETSQ GALGTLANV  
 VTSLANLSESLNNGDASEMQPEDQSASEITRAFDTLAKALNTTDSASPPSLADGIDASGGGSIHVISRQ  
 STPIIEVEGPLSDTHVTFKLTMPSPMPEYLNHVHYICESASRLLFLSMHWARSIPAFQALGQDCNTSLVR  
 ACWNEFLTGLAQCAQVMSLSTILAAIVNHLQNSIQEDKLSGDRIKQVMEHIWKLQEFNCNSMAKLDIDGH  
 EYAYLKAIVLFSPDHPGLTGTSTQIEKFQEKQAMELQDYVQKTYSEDYRLARILVRLPALRLMSSNITEE  
 LFFTGLIGNVSIDSIIIPYILKMETAEYNGQITGASL

>Q9GSG7\_AEDAE

MDPSDRGFDAALVGHMGPLSPQDMKPDLPDISLLNGSVGPFSPGNCCGPASPGAFNQVAAALQQQQQN  
 VNSLNSQQSGGGGGGGGTPPTPTNMSQQYPPNHPLSGSKHLCSICGDRASGKHYGVYSCGCKGFFKRT  
 VRKDLSYACREDKNCTIDKRQRNRCQYCRYQKCLACGMKREAVQEERQRSSKFSIKSEEINSTSSVRDVT  
 IERIEAEQLSEQKSGDNAIPYLRVGSNSMIPPEYKGAVSHLCQMVNKQIYQLIDFARRVPHFINLPRDD  
 QVMLLRCGWNEMLIAAVAWRSMEYIETERSSDGSRI TVRQPQLMCLGNFTLHRNSAQAGVDTLFDRI  
 CELGIKMKRLDVTRAEGLVKAIILFNPDIRGLKCQKEIDGMREKIYACLDEHCKQQHPSEDGRFAQLLL  
 RLPALRSISLKCLDHLNFIRLLSDKHLDSFIVEMLDMPI

>Q9U7D9\_LOCFI

MEGSESGISLENNLSISSMGQSPLDMPDASLISGFSPTGGPNSPGSFTIGHSSLLNNSSSNQAKG  
 SSSQYPPNHPLSGSKHLCSICGDRASGKHYGVYSCGCKGFFKRTVRKDLSYACREDKNCTIDKRQRNRC  
 QYCRYQKCLAMGMKREAVQEERQRTKERDQNEVESTSSLHTDMPVERILEAEKRVECKAENQVEYELVEW  
 AKHIPHFTSLPLEDQVLLLRAGWNELLIAAFSHRSVDVKDGI VLATGLTVHRNSAQAGVGTIFDRLVTE  
 LVAKMREMKMDKTELGLRSVILFNPEVRGLKSAQEVLLREKVYAALEEYTRTTHPDEPGRFAKLLRL  
 PSLRSIGLKCLEHLFFRLIGDVPIDTFLMEMLES PDS

>USP\_BOMMO

MSSVAKKDKRTMSVTALINRAWPMTSPQQQQMVPSTQHSNFLHAMATPSTTPNVELDIQWLNIESGFM

SPMSPPEMKPDTAMLDFRDDSTPPPPFKNYPPNHPLSGSKHLCSICGDRASGKHYGVYSCEGCKGFFKR  
 TVRKDLTYACREDKNCIIDKRQRNRCQYCRYQKCLACGMKREAVQEERQRAARTEDAHSSSVQELSIE  
 RLLELEALVADSAEELQILRVGPESGVPKRYRAPVSSLCQIGNKQIAALIVWARDIPHFGQLEIDDQILL  
 IKGSWNELELLFAIAWRSMEFLNDERENVDSRNTAPPQLICLMPGMTLHRNSALQAGVGQIFDRVLSELSL  
 KMRSRMDQAECVALKAIILLNPDVKGLKNKQEVVDVLRKMFCLCLDEYCRRSRGGEGRFAALLLRLPAL  
 RSISLKSFEHLYLFHLVAEGSVSSYIRDALCNHAPPIDTNIM

>Q8VIJ3\_MOUSE

MATIEEIAHQIIDQQMGEIVTEQQTGQKIQIVTALDHSTQGKQFILANHEGSTPGKVFLTPDAAGVNQL  
 FFTSPDLSAPHLQLLTENSPDQGPKNVFDLVCVCGDKASGRHYGAITCEGCKGFFKRSIRKNLVYSCRGS  
 KDCVINKHHRNRCQYCRQLQRCIAFGMKQDSVQCERKPIEVSREKSSNCAASTEKIYIRKNLRSPLAATPT  
 FVTDSETARSAGLLDSGMFVNIHPSGIKTEPAMLMAPDKAESQCGDLSTLASVVTSLANLGKTKDLSHCG  
 GDMFVVQSLRNGDTSFGAFHHDIQTNQDVSRAFDTLAKALTPGESTSCQSSEEGMEGSPHILIAGEPSFVE  
 KEGPLLESHVAFRLTMPSPMPEYLNHVHYIGESASRLFLSMHWALSIPSFQALGQENSISLVKAYWNE  
 FTLGLAQCWQVMNVATILATFVNCLHSSLQQDKMSPERRKSLMEHIFKLQEFCSMVKLCIDGHEYAYLK  
 AIVLFSPDHPGLENMELIERFQEKAYVEFQDYITRTPDDTYRLSRLLLRLPALRLMNATITEELFFKGL  
 IGNVRIDSVIPHILKMEPADYNSQIIGHSL

>Q8VIJ4\_RAT

MATIEEIAHQIIDQQMGEIVTEQQTGQKIQIVTALDHSTQGKQFILANHEGSTPGKVFLTPDAAGVNQL  
 FFASPDLSTPHLQLLTENSPDQGPKNVFDLVCVCGDKASGRHYGAITCEGCKGFFKRSIRKNLVYSCRGS  
 KDCIINKHHRNRCQYCRQLQRCIAFGMKQDSVQCERKPIEVSREKSSNCAASTEKIYIRKDLRSPLAATPT  
 FVTDSETARSTGLLDSGMFVNIHPSGIKTEPALLMTPDKAESQCGDLGTLASVVTSLANLGKAKDLSHCG  
 GDLFVVQSLRNGDTSFGAFHQDIQTNQDVSRAFNDLAKALTPGENPACQSPGESMEGSTHLIAGEPSCME  
 REGPLLSDSHVVFRLTMPSPMPEYLNHVHYIGESASRLFLSMHWALSIPSFQALGQENSISLVKAYWNE  
 FTLGLAQCWQVMNVATILATFVNCLHNSLQQDKMSPERRKLLMEHIFKLQEFCSMVKLCIDGHEYAYLK  
 AIVLFSPDHPGLENMELIEKFQEKAYVEFQDYITRTPDDTYRLSRLLLRLPALRLMNATITEELFFKGL  
 IGNVRIDSVIPHILKMEPADYNSQIIGHSL

>HNF4\_DROME

MHADALASAYPAASQPHSPIGLALSPNGGGLGLSNSSNQSSNFALCNGNGNAGSAGGGSASSGNNNNS  
 MFSPNNNLSGSGSGTNSQQQLQQQQQQQSPTVCAICGDRATGKHYGASSCDGCKGFFRRSVRKNHQYTC  
 RFARNVCVVDKDRNQCRYCRLRKCFCAGMKKEAVQNERDRISCRRTSNDPDPGNGLSVISLVKAENESR  
 QSKAGAAMEPNINEDLSNKQFASINDVCESMKQQLTLVEWAKQIPAFNELQLDDQVALLRAHAGEHLLL  
 GLSRRSMHLKDVLLSNNCVITRHCPLVSPNLDISRIGARIIDELVTVMKDVGIDDTEFACIKALVFF  
 DPNAGLNEPHRIKSLRHQILNNLEDYISDRQYESRGRFGEILLILPVLQSITWQMIEQIQFAKIFGVAH  
 IDSLLEMLLGGELADNPLPLSPPNQSNQDYQSPHTGNMEGQVNSLDSLATSPPGSGSHSLDLEVQHI  
 QALIEANSADDSFRAYAATAAAAAAAVSSSSSAPASVAPASISPLNSPKSQHQHQHATHQQQQESSY  
 LDMPVKHYNGSRSGPLPTQHSPPQRMHPYQRAVASPVEVSSGGGGLGLRNPADITLNEYNRSEGSAAEELL  
 RRTPLKIRAPEMLTAPAGYGTEPCRMTLKQEPETGY

>Q62152\_MOUSE

MATIEEIAHQIIDQQMGEIVTEQQTGQKQIVTALDHSTQGKQFILANHEGSTPGKVFLTPDAAGVNQL  
 FFTSPDLSAPHLQLLLEKSPDQGPKNVFDLVCVCGDKASGRHYGAITCEGCKGFFKRSIRKNLVYSCRGS

KDCVMNKHHRNRCQYCR LQRCIAFGMKQDSVQCERKPIEVSREKSSNCAASTEKIYIRKDLRSPLAATPT  
 FVTDSETARSAGLLDSGMFVNIHPSGIKTEPAMLMAPDKAESQCGDLSTLASVVTSLANLGKAKDLSHCG  
 GDMPPVQSLRNGDTSSVLFIMIFKTNGDVSRAFDTLAKALTPGESTSCQSPEEGMEGSPHILIAGEPSFVE  
 KEGPLLESHIAFRLTMPSPMPEYLNHAHYIGESASRLLFLSMHWALSIPSFQALGQENSISLVKAYWNL  
 FTLGLAQCWQVMNVATILATFVNCLHSSLQQDKMSAERRKSLMEHIFKQLQEFNCNSMVKLCIDGHEYAYLK  
 AIVLFSPDHPGLENMELIERFQEKAYVEFQDYITRTPDDTYRLSRLRLPALRLMNATITEELFFKGL  
 IGNVRIDSVIPHILKMEPADYNSQIIGHSL

>Q6GL59\_XENTR

MAMVSGGWGDPNGDTNGVKGYPNREEEASPOGGMSDPEQGDEERPGIQVDCVVCQDKSSGKHYGVFT  
 CEGCKSFFKRSVRRNLSYTCRSNRDCQIDQHHRNQCQYCR LKCCFRVGMKEAVQRGRIPPAHSSASPTS  
 APGAGEYFNGQPVSELI S QLLRAEPYPASRYGSQYAQQGSVMGIDNICELARLLFSTVEWSRNIPYFPE  
 LAMADQVSLRLSWSELFVLSAAQSALPLHMAPLLAAAGFHASPM SADRVSFMDQIRLFQDQVEKLNRL  
 QVDSA EYACLKAIALFTSDACGLTDPAHVESLQEKQVALTEYVRAQYPSQPQRFRGRLRLPALRAVPA  
 SLISQLFFMRLVGKTP IETLIRDMLLSGSSFNWPYSSGQ

>Q7T0T7\_XENLA

MAMVSGGWGDPNGDTNGVKGYPNREEEASPOGGMSDPEQGDEERPGIQVDCVVCQDKSSGKHYGVFT  
 CEGCKSFFKRSVRRNLSYTCRSNRDCQIDQHHRNQCQYCR LKCCFRVGMKEAVQRGRIPPAHSSASPTS  
 APGAGEYFNGQPVSELI S QLLRAEPYPASRYGSQYTQQGSVMGIDNICELARLLFSTVEWSRSIPYFPE  
 LAVADQVSLRLSWSELFVLSAAQSALPLHMAPLLAAAGFHSSPM SADRVSFMDQIRLFQDQVEKLNRL  
 QVDSA EYACLKAIALFTSDACGLTDPAHVESLQEKQVALTEYVRAQYPSQPQRFRGRLRLPALRAVPA  
 SLISQLFFMRLVGKTP IETLIRDMLLSGSSFNWPYSSGQ

>Q922G8\_MOUSE

MAMVTGGWGDPPGDTNGVDKAGGSYPRATEDDSASPPGATSDAEPGDEERPGLQVDCVVCQDKSSGKHYG  
 VFTCEGCKSFFKRSIRRNLSYTCRSNRDCQIDQHHRNQCQYCR LKCCFRVGMKEAVQRGRIPHALPGPA  
 ACSPPGATGVEPFTGPPVSELIAQLLRAEPYPAAGRFGGGGAVLGIDNVCELAARLLFSTVEWARHAPFF  
 PELPAADQVALLRLSWSELFVLSAAQAALPLHTAPLLAAAGLHAAPMAAERAVAFMDQVRAFQEQVDKLG  
 RLQVDAAEYGCLKAIALFTPDACGLSDPAHVESLQEKQVALTEYVRAQYPSQPQRFRGRLRLPALRAV  
 PASLISQLFFMRLVGKTP IETLIRDMLLSGSTFNWPYGSQ

>Q9NFY1\_TENMO

MTMESTDRALS LDQNLSMGLGAPHSPLDMKPDASTLGQNSPVSFASGHGSLLSFSPQPPSGGTPNKSC  
 GSLYPPNHPLSGSKHLCSICGDRASGKHYGVYSCEGCKGFFKRTVRKDLSYACREEKNCIDKRQRNRCQ  
 YCRYQKCLNMGKREAVQEERQRTKDRDTSEVESTSNMQAEMPLDRI IEAEKRIECTPAGGSGGVGEQHD  
 GVNNICQATNKQLFQLVQWAKLIPHFTSLPMSDQVLLLRAGWNELLIAAFSHRSIQADAI VLATGLTVN  
 KTSAHAVGVGNIDRVLSLVNKMKEKMDKTELGLRAIILYNPTCRGIKSVQEVEMLEKIIYGVLEEY  
 TRTTHPNPGRFAKLLRLPALRSIGLKCSEHLFFFKLIGDVPI DTFMEMLES PADA

>EAR2\_MOUSE

MAMVTGGWGDPPGDTNGVDKAGGSYPRATEDDSASPPGATSDAEPGDEERPGLQVDCVVCQDKSSGKHYG  
 VFTCEGCKSFFKRTIRRNLSYTCRSNRDCQIDQHHRNQCQYCR LKCCFRVGMKEAVQRGRIPHALPGPA  
 ACSPPGATGVEPFTGPPVSELIAQLLRAEPYPAAGRFGGGGAVLGIDNVCELAARLLFSTVEWARHAPFF



PELPAADQVALLRLSWSELFVLNAAQAALPLHTAPLLAAAGLHAAAPMAAERAVAFMDQVRAFQEQVDKLG  
 RLQVDAAEYGCCLKAIALFTPACGLSDPAHVESLQEKAQVALTEYVRAQYPSQPQRFGRLLLLRRLPALRAV  
 PASLISKLFFMRLVGKTPIETLIRDMLLSGSTFNWPYGS

>Q6P117\_BRARE

MAMVRGGWGDPNGETNGLGDKGYLRGDEDDGSPQGGGSDMEAGEDDKGCVVDCVVCGBKSSGKHYGVFTC  
 EGCKSFFKRSVRRNLNYTCRSNRDCQIDQHHRNQCYCRLKKCFRVGMRKEAVQRGRI PPSHSSLSPSTT  
 PVGGNAGGGVSEFYNGQPVSELISQLLRAEPYPNSRYSHQYNQMQGGGGGGSGMGIDSICELAAARLLFS  
 IIEWARNIPYFPELPVSEQVALLRLSWSELFILNAAQSALPLHMAPLLAAAGFHSSPMSAERVVSFMDQV  
 RVFQDQVEKLRQLQVDSAEYSCLKAIALFSPDACGLTDPAHVESLQEKAQVALTEYERMQYPGQPQRFGR  
 LLLRRLPALRAVPASLISQLFFMRLVGKTPIETLIRDMQLSGSSISWPYAPGQ

>EAR2\_RAT

MAMVTGGWGGPGGDTNGVDKAGGSYPRATEDDSASPPGATSDAEPGDEERPGLQVDCVVCGBKSSGKHYG  
 VFTCEGCKSFFKRTIRRNLSYTCRSNRDCQIDQHHRNQCYCRLKKCFRVGMRKEAVQP GPI PHALPGPA  
 ACSPPGAAGVEPFAGPPVSELIAQLLRAEPYPAAGRFGGGGAVLGIDNVCELAARLLFSTVEWARHAPFF  
 PELPAADQVGLLRLSWSELFVLNAAQAPVPLHTAPLLAAAGLHAGPMAAERAVAFMDQVRAFQEQVDKLG  
 RLQVDAAEYGCCLKAIALFTPACGLSDPAHVESLQEKAQVALTEYVRAQYPSQPQRFGRLLLLRRLPALRAV  
 PASLISQLFFMRLVGKTPIETLIRDMLLSGSTFNWPYGS

>Q5QP8\_HUMAN

MRLSKTLVDMADYSAALDPAYTTLEFENVQVLTMGNDTSPSEGTLNAPNSLGVSAICAIGDRATGK  
 HYGASSCDGCKGFFRRSVRKNHMYSCRFSRQCVDKDKRNQCRYCRLKKCFRAGMKKEAVQNERDRISTR  
 RSSYEDSSLPSINALLQAEVLSRQITSPVSGINGDIRAKKIASIADVCESMKEQLLVLEWAKYIPAFCE  
 LPLDDQVALLRAHAGEHLLLGATKRSMVFKDVLLGNDYIVPRHCPELAEMSRVSIRILDELVLVLPFQELQ  
 IDDNEYAYLKAIIFFDPAKGLSDPGKIKRLRSQVQVSLDYINDRQYDSRGRFGELLLLLLPTLQSIWQ  
 MIEQIQFIKLFMAKIDNLLQEMLLGGPCQAQEGRWGSDSPGDRPHTVSSPLSSLASPLCRFGQVA

>Q962I5\_LUCCU

MDNGEQDAGFRLAPMSPQEIKPDISLLNENNTSSYSKPGSPNPFAGLQAINAVAAANANNQNMLQTT  
 PPQQQQYPPNHPLSGSKHLCSICGDRASGKHYGVSCEGCKGFFKRTVRKDLTYACREDRNCI IDKRQRN  
 RCQYCRYQKCLACGMKREAVQEERQRTAANARAAGAGGGGGGGVSNVVGAGGEDFKPSSSLRDLTI  
 ERIIEAEQKAESLSGDNVLPFLRVGNNSMVQHDYKGAVSHLCQMVNKQLYQMVEYARTRPHFTHLQREDQ  
 ILLKAGWNELLIANVAWCSIESLDAEYASPGTVHDGSFGRRSFVRQPQQLFLNQNF SYHRNSAIKANVV  
 SIFDRILSELSIKMKRLNIDRSELSCLKAIIIFNPDIRGLKCRADVEVCREKIYACLDEHCRTEHPGDDG  
 RFAQLLLRRLPALRSISLKLCLDHLFFFRLIGERALEELIAEQLEAPIC

>Q6P115\_BRARE

MAMVSGGWANPNGSANGLGEKGYLRGEEEGSSPQAGNSDVEGGGEDKACVVDCVVCGBKSSGKHYGVFTC  
 EGCKSFFKRSIRRNLYTCRSNRECQIDQHHRNQCYCRLKKCFRVGMRKEAVQRGRI PPSHAGISPASM  
 VGAGGDVGGGPGMGADFFNGQPVSELISQLLRAEPYPNSRYGAQCQQLQGANSSMMGIDNICELARLL  
 FSTIEWARNIPYFPDLVSEQVALLRLSWSELFILNAAQSALPLHTAPLLAAAGFHSSPMPADRVSFMD  
 QVRVFQDQVDKLRQLQVDSVEYSCLKAIALFSPDACGLSDPAHVESLQEKAQVALTEYERMQYPGQPQRF  
 GRLLLLRRLPALRAVPANLISQLFFMRLVGKTPIETLIRDMQLSGSSISWPYVPGQ

>O61449\_9ACAR

MAYQEPTRNLNNGGASNGVSSSLPQPSTYLSGGYGGTLSVNRAPADGQPTLSNGPSSATAPGGDSRFP  
 ATHPLSGSKHLCSICGDRASGKHYGVYSCEGCKGFFKRTVRKDLTYACREERRCVVDKQRNRCQYCRYQ  
 KCLMCGMKREAVQEERQRAKDRNDNEVESTSGGVGVSGVGGPGSPDMPLEERILEAEMRVEQPAPSVLAQ  
 TAASGRDPVNSMCQAAPPLHELQWARRIPHFEELPIEDRTALLKAGWNELLIAAFSHRSVAVRDGIVLA  
 TGLVVQRHSAHGAGVGDIFDRVLAELVAKMRDMKMDKTELGCLRAVVLFNPDAGLRNATRVEALREKVY  
 AALEEHCRRHPDQPGFRFGKLLRLPALRSIGLKCLEHLFFFKLIIGDTPIDSFLLNMLEAPADP

>O61448\_9ACAR

MATQERAPGLNGGTSNGVSSSLPQPSPSLPAERLRRALGSITVGRPAAQQRSSGDTATAAAATSHHALSTK  
 PPLSGSKHLCSICGDRASGKHYGVYSCEGCKGFFKRTVRKDLTYACREERTCIIDKQRNRCQYCRYQKC  
 LACGMKREAVQEERQRTKDRADSEVESTSGGAPPEMPLEERILEAELRVESQTGTLSESAQQQDPVSSICQ  
 AADRQLHQVLQWAKHIPHFEELPLEDRMVLLKAGWNELLIAAFSHRSVDVRDGI VLATGLVVQRHSAHGA  
 GVGAI FDRVLTELVAKMREMMDRTELGCLLAVLVFNPEAKGLRTPSGGPEGESVSALEEHCRRQQYPDQ  
 PGRFAKLLRLPALRSIGLKCLEHLFFFKLIIGDTPIDNLFLLSMLEAPSDP

>HNF4A\_MOUSE

MDMADYSAALDPAYTTLEFENVQVLTMGNDTSPSEGANLNSSNSLSVSALCAICGDRATGKHYGASSCDG  
 CKGFFRRSVRKNHMYSCRFSRQCVDKDKRNQCRYCRLKCCFRAGMKKEAVQNERDRISTRSSYEDSSL  
 PSINALLQAEVLSQQITSPISGINGDIRAKKIANITDVCEMSKEQLLVLVEWAKYIPAFCELLLDDQVAL  
 LRAHAGEHLLL GATKRSMVFKDVLLLGNDYIVPRHCPELAEMSRVSIRILDELVLFPQELQIDDNEYACL  
 KAIIFDPAKGLSDPGKIKRLRSQVQVSLEDYINDRQYDSRGRFGELLLLLPTLQSI TWQMIEQIQFIK  
 LFGMAKIDNLLQEMLLGGASDAPHTHHPLHPLMQEHMGTNVI VANTMPSHLSNGQMCEWPRPRGQAAT  
 PETPQPSPPSGSGSESYKLLPGAITTI VIKPPSAIPQPTITKQEI

>HNF4A\_RAT

MDMADYSAALDPAYTTLEFENVQVLTMGNDTSPSEGANLNSSNSLGV SALCAICGDRATGKHYGASSCDG  
 CKGFFRRSVRKNHMYSCRFSRQCVDKDKRNQCRYCRLKCCFRAGMKKEAVQNERDRISTRSSYEDSSL  
 PSINALLQAEVLSQQITSPISGINGDIRAKKIANITDVCEMSKEQLLVLVEWAKYIPAFCELLLDDQVAL  
 LRAHAGEHLLL GATKRSMVFKDVLLLGNDYIVPRHCPELAEMSRVSIRILDELVLFPQELQIDDNEYACL  
 KAIIFDPAKGLSDPGKIKRLRSQVQVSLEDYINDRQYDSRGRFGELLLLLPTLQSI TWQMIEQIQFIK  
 LFGMAKIDNLLQEMLLGGASDAPHHHPLHPLMQEHMGTNVI VANTMPSHLSNGQMCEWPRPRGQAAT  
 PETPQPSPPSGSGSESYKLLPGAITTI VIKPPSAIPQPTITKQEI

>Q6PHH5\_BRARE

MRLSKPLVDMEMADYSEALDPAYTTLEFENMQVLAMSTDSSPQESANMNAANHLGAGTLCAICGDRATGK  
 HYGASSCDGCKGFFRRSVRKNHMYSCRFNRCIVDKDKRNQCRYCRLKCCFRAGMKKEAVQNERDRISTR  
 RSSYEDSSLPSINALIQADVLSRQISSPGPILNGDIRTKKVAAIMDVCEMSKQQLLVLVEWAKYIPAFCD  
 LPLDDQVALLRAHAGEHLLLGAAKRSMYKIDILLGNDHII PRNCPPELEVSRVAVRILDELVLFPQDLQI  
 DDNEYACLKAIIFDPAKGLSDPSKIKRMRYQVQVSLEDYINDRQYDSRGRFGELLLLLPTLQSI TWQM  
 IEQIQFVKLFGMAKIDNLLQEMLLGGASANEAPHHSLHPLVQEHLSNNVI VTANMATPLHNGQMSTPE  
 TPIPSPTASGSDHYKMASGVIATVPKQPSSIPQPTITKQEI

>Q9JJI9\_TAMSI

MDMADYSAALDPAYTTLEFENVQVLMGNDTSPSEGTNLAAPNSLGVSAALCAICGDRATGKHYGASSCDG  
 CKGFFRRSVRKNHMYSCRFSRQCVVDKDKRNQCRYCRLKCCFRAGMKKEAVQNERDRISTRSSYEDSSL  
 PSINALLQAEVLSQQITSPVSGINGDIRAKKIANIADVCESMKEQLLVLEWAKYIPAFCELLLDDQVAL  
 LRAHAGEHLLLGAATKRSVMFKDVLGNDYIVPRHCPPELAEMSRVSVIRILDELVLVLPFQELQIDDNEYACL  
 KAIIFFDPAKGLSDPGKIKRLRSQVQVSLEDYINDRQYDSRGRFGELLLLLPTLQSIWQMIQIQFIK  
 LFGMAKIDNLLQEMLLGGSSSDAPHAHHPLHPLMQEHMGTNVIVANTMPHLSNGQMSTPETPQPSPPG  
 GSGSEPYKLLPGAITTIVKPPSAIPQPTITKQEVI

>Q7YRQ5\_BOVIN

MDMADYSAALDPAYTTLEFENVQVLTMGNDTSPSEGANLNAPNSLGVSAALCAICGDRATGKHYGASSCDG  
 CKGFFRRSVRKNHMYSCRFSRQCVVDKDKRNQCRYCRLKCCFRAGMKKEAVQNERDRISTRSSYEDSSL  
 PSINALLQAEVLSQQITSPVSGINGDIRAKKIASIADVCESMKEQLLVLEWAKYIPAFCELPLDDQVAL  
 LRAHAGEHLLLGAATKRSVMFKDVLGNDYIVPRHCPPELAEMSRVSVIRILDELVLVLPFQELQIDDNEYACL  
 KAIIFFDPAKGLSDPGKIKRLRSQVQVSLEDYINDRQYDSRGRFGELLLLLPTLQSIWQMIQIQFIK  
 LFGMAKIDNLLQEMLLGGSSSEAPHAHHPLHPLMPEHMGTNVIVANTMPAHLNSNGQMSTPETPQPSPPG  
 GSGSEPYKLLPGAIATIVKPPSAIPQPTITKQEVI

>HNF4A\_HUMAN

MDMADYSAALDPAYTTLEFENVQVLTMGNDTSPSEGTNLNAPNSLGVSAALCAICGDRATGKHYGASSCDG  
 CKGFFRRSVRKNHMYSCRFSRQCVVDKDKRNQCRYCRLKCCFRAGMKKEAVQNERDRISTRSSYEDSSL  
 PSINALLQAEVLSRQITSPVSGINGDIRAKKIASIADVCESMKEQLLVLEWAKYIPAFCELPLDDQVAL  
 LRAHAGEHLLLGAATKRSVMFKDVLGNDYIVPRHCPPELAEMSRVSVIRILDELVLVLPFQELQIDDNEYAYL  
 KAIIFFDPAKGLSDPGKIKRLRSQVQVSLEDYINDRQYDSRGRFGELLLLLPTLQSIWQMIQIQFIK  
 LFGMAKIDNLLQEMLLGGSPSDAPHAHHPLHPLMQEHMGTNVIVANTMPHLSNGQMCEWPRPRGQAAT  
 PETPQPSPPGGSGSEPYKLLPGAVATIVKPLSAIPQPTITKQEVI

>Q5RH32\_BRARE

MEGESPRIQLVSADGGLQIVTEQQLAQKVQIVTAIDQAGAGKQQFILANLDYPNQEKLFIKQENSPAKVI  
 LTSSDGSAVNQLLFASPELSGQQIQFVTDGSDQGSMPKPPVEYCVVCGDKASGRHYGAVSCEGCKGFFKRS  
 IRKNLVYTCRSGGECVINKHHRNRCQYCRQLQRCMALGMKQDSVQCERKPEVSREKPANCAPSIEKIYIR  
 KNLCSPLAAMPTFVSQKESTRPTSLLDSNMLLNIQQSISKLDNTILIPSSPDQNDSSQDGLGTLANVVTS  
 LGHLNKSREMMDSSTDLSGIDTMSNDDSVMTDIQREESNDVTRAFDTLTKVLKAEESCGEVADGAVAVR  
 DDEQTSALLELEGLPLSDMHVPFKLMMPLPMPDFLNLNYICESASRLLFLSMHWARSIPAFQALGSENGI  
 TLMKACWNELEFALGLAQCSHIMNVETILTAINHLQTSLDEEKLSPERVKQVMEHIWRMQEFCNSMSRMS  
 PDAYEYAYLKAVVLFSPDHSADVDTLQIERFQEKAYMELQDYVSKVYPEDTYRLSKLLVRLPALRLMSAA  
 VTEELFFAGLIGNVQIDSIIPIYILKMESTDYN SQPISGVE

>Q7SZG3\_FUGRU

MHSSSEDIKPPFGLRVPVPAHSPGLMMSQKRMVICGDRSSGKHYGVYSCEGCKGFFKRTVRKDLSTYC  
 RDNKECLVDRQRNRCQYCRYQKCLAMGMKREAVQEERQRNREREGELFSVSVNEEMPVEKILAAETAV  
 EQKTELHSDGVSAGNSPHDAVSNICQTADKQLFALVEWAKRIPHFSELPLEDQVILLRAGWNEILLIASFS  
 HRSINSKDGVLASELQRDSANSAGVGAI FDRENVQSAEVGAI FDRVLTELVNKMRDMQMDKTELGLCLRA  
 IVLFNPDAGLSKSSEVELLREKVYASLEAYCKQRYPEQQGRFAKLLRLPALRSIGLKCLEHLFFFKLI

GDTPIDTFLMEMLEAPHHLS

>Q8AVK3\_XENLA

MRLSKALIDMDMADYTEALDPAYTTLEFENMQVLSIGTDTSTSDVTSLSASNSIGINSLCAICGDRATGK  
HYGASSCDGCKGFFRRSVRKNHMYSRFRSRQCVDKDKRNQCRYCRLKCCFRAGMKKEAVQNERDRISTR  
RSSYEDSSLPSINVLQAEVLSQQITSSVGLNNTDIRGKKIACIIDVCDSMKQQLLVLEWAKYIPAFCE  
LPLDDQVALLRAHAGEHLLL GATKRSMFKDILLGNDRLI PRNCPPELEVGRVAVRILDELVLFPQELQI  
DDNEYACLKAIIFFDPAKGLSDPTKIKRMRYQVQVSLLEDY INDRQYDSRGRFGDLLLPTLQSI TWQM  
IEQIQFVKLFGMAKIDNLLQEMLLGGSSANEASHTHHHLPHPLVQDHLATNVIVANNTLPSQLHNGQMSTP  
ETPQPSPAGSGAEQYKIVHGHTIASINKQPTSI PQSTITKQEAM

>Q5QPB7\_HUMAN

MILLPLRLARLRHPLRHHSISGGVDSSPQGDTS PSEGTLNAPNSLGV SALCAICGDRATGKHYGASSC  
DGCKGFFRRSVRKNHMYSRFRSRQCVDKDKRNQCRYCRLKCCFRAGMKKEAVQNERDRISTRSSYEDS  
SLPSINALLQAEVLSRQITSPVSGINGDIRAKKIASIADVCE SMKEQLLVLEWAKYIPAFCE LPLDDQV  
ALLRAHAGEHLLL GATKRSMVFKDVLLGN DYIVPRHCPELAEMSRV SIRILDELVLFPQELQI DDNEYA  
YLKAIIFFDPAKGLSDPGKIKRLRSQVQVSLLEDY INDRQYDSRGRFGELLLLPTLQSI TWQMIEQIQF  
IKLFGMAKIDNLLQEMLLGGSPSDAPHAHHLPHPLMQEHMGTNVIVANTMPHLSNGQMCEWPRPRGQA  
ATPETPQPSPGGSGSEPYKLLPGAVATIVKPLSAIPQPTITKQEVI

>Q6IVK1\_PLOIN

MEPSRESGLNLENSTFMS PMSPPMKPDTAMLDGLRDDATSPPSFKNYPPNHPLSGSKHLCSICGDRASG  
KHYGVYCEGCKGFFKRTVRKDL SYACREERNCIIDKRQRNRCQYCRYQKCLACGMKREAVQEERQRAAR  
GTEDAH PSSSVQSAEELS IERLLEMEALVADTSEEQFLRVGPDSNVPPKFRAPVSSLCQIGNKQIAAL  
VVWARDIPHFSQLELEDQVTLIKASWNE LLLFAIAWRSM EYLTDERDNVDGSR TTSPPQLMCLMPGMTLH  
RNSALQAGVQIFDRVLSELALKMRS LPVDQAEYVALKAVILLNP DVKGLNSRQEVEVLREKMY SCLDEY  
CRRSRGSEEGRFASLLRLPALRSISLKSFEHLFFFHLVADGSI PGYIRDALRSHKPLDASSIM

>Q95WF7\_ACRMI

MAGVPAQSWCTEKTEPLEESA EKNVQQVECAVCGDKSSGKH YGVFTCEGCKSFFKRSVRRNLSYTCRASR  
NCPIDQHHRNQCQYCLRKCMKVGMRREAVQRGRIPPTQVPQSPQHSALNGNDVSNHGSF LSGFISLLL  
RAEPYPTTRFQQGMNMP CGIMGIENICELAA RLLFS AVEWARNIPFFPDLAVTDQVALLRLVWSEL FVLN  
AAQCPMPLQVAPLLASAGIHSNHMSPDRMVT FMDNVRIFQE QIEKYRNLHVDAAEFACLKAI VLF TSDAS  
GLTDPQYIESLQEK TQCALEEYTRNQYPNQPTRFGKLLRLPLSLRSINSSIVEQLFFVRLVGKTPIDTLL  
RDMLLSGTPTS WPYLPCS

>Q6LDB2\_9MURI

MNYPSTSPGSLVKHICAI CGDRSSGKH YGVYCEGCKGFFKRTIRKDLIYTCRDNKDCLIDKRQRNRCQY  
CRYQKCLVMGMKREAVQEERQSRERAESEAE CASSHEDMPVERILEAE LAVEPKTESY GDMNVENSTN  
DPVTNICHAAADKQLFTLVEWAKRIPHFSDLTLEDQVILLRAGWNE LLIASFHSRSVSVQDGILLATGLHV  
HRSSAHSAGVGSIFDRVLTELVSKMKDMQMDKSELGCLRAIVLFNPD AKGLSNPSEVETLREKVYATLEA  
YTKQKYPEQPGRFAKLLRLPALRSIGLKCLEHLFFFKLIGDTPIDSFLMEMLETPLQIT

>Q8AXB6\_BRARE

MEMADYSEALDPAYTTLEFENMQVLMSTDSSPQESANMNAANHLGAGTLCAICGDRATGKHYGASSCDG  
 CKGFFRRSVRKNHMYSCRFRNRQCIVDKDKRNQCRYCRLKCCFRAGMKKEAVQNERDRISTRSSYEDSSL  
 PSINALIQADVLSRQISSPGPILNGDIRTKKVAAIMDVCESMKQQLLVLEWAKYIPAFCDLPLDDQVAL  
 LRAHAGEHLLLGAAKRSMYKDILLGNLDHIIPRNCPELEVSRVAVRILDELVLFPQDLQIDDNEYACLK  
 AIVFFDPDAKGLSDPSKIKRMRYQVQVSLEDYINDRQYDSRGRFGELLLLLLPTLQSIWQMIEQIQFVKL  
 FGMKIDNLLQEMLLGGSANEAPHAAHSLHPLVQEHLNINVIVTANMATPLHNGQMSTPETPIPSPTA  
 SGSDHYKMASGVIATVPKQPSSIPQPTITKQEI

>Q8I1M8\_9NEOP

MEPSREPLNLEGSFMSPPMSPKPDAMLDVLRDDATSPPSFKNYPPNHPLSGSKHLCSICGDRASGK  
 HYGVSCEGCKGFFKRTVRKDLTYACREERNCIIDKRQRNRCQYCRYQKCLACGMKREAVQEERQRAARG  
 TEDPLPSSSVQELSIERLLEMESLVADTSEECQFLRVGPESNVPPKFRAPVSSLCQIGNKQIAALVWAR  
 DIPHFSQLEMDDQVLLIKGAWNELLFAIAWRSMEFLNDERENMDGSRRTTSPQLMCLMPGMTLHRNSAL  
 QAGVGQIFDRVLSLSLKMRLRMDQAEYVALKAIILLNPDIKGLGNRQEVVLEKMYSCLEDEYCRVR  
 VSEEGRFASLLRLPALRSISLKSFEHLFFFHLVADSSIAGYIRDLLRHHAPPIDASALM

>HNF4A\_XENLA

MDMADYTEALDPAYTTLEFENMQVLSIGTDTSTSDVTSLSASNSIGINSLCAICGDRATGKHYGASSCDG  
 CKGFFRRSVRKNHMYSCRFSRQCIVDKDKRNQCRYCRLKCCFRAGMKKEAVQNERDRISTRSSYEDSSL  
 PSINVLIAQAEVLSQQITSSVGVLNTRDIRGKKIACIIDVCDMSKQQLLVLEWAKYIPAFCELPLDDQVAL  
 LRAHAGEHLLLGAATKRSMMFKDILLGNDRLIIPRNCPELEVGRVAVRILDELVLFPQELQIDDNEYACLK  
 AIIFFDPDAKGLSDPTKIKRMRYQVQVSLEDYINDRQYDSRGRFGELLLLLLPTLQSIWQMIEQIQFVKL  
 FGMKIDNLLQEMLLGGSANEASHTHHLHPLVQDHLATNVIVANNTLPSQLHNGQMSTPETPQPSPPA  
 GSGAEQYKIVHGTIASINKQPTSIPQSTITKQEAM

>Q8JID3\_CHICK

MATIEELAHQIIIEQQMGEITHSQGAVTQTLMDGAAQRIQIVPSDSGLSLPQRIQILTDNSSNEQALNKVF  
 DLCVVCQDKASGRHYGAVTCEGCKGFFKRSIRKNLVYSCRGTDCVINKHHRNRCQYCRQLQRCIAFGMKQ  
 DSVQCERKPIEVSREKSSNCAASTEKIYIRKDLRSPLAATPTFVTDNETARSTGLLESGMFVNIQSGIKS  
 EPTVLMTPDKVEACQGDLSLANVVTSLANLSKSKDLSQSGTELSMIESLSNGDGLPELQQEEQGSDDV  
 TRAFDTLAKALNPGESAACQNSESAEANVQLGAEETSMNIVETSMNIVEIEGPLLSDAHVAFRLTMPSPM  
 PEYLVNHYICETASRLFLSMHWARSIPSFQALGQDNSISLVKACWNEFLTLGLAQCSQVMNVATILAAF  
 VNHLHDSLQQDKLPTDRGKLVMEHIFKLQEFCSMVKLCCLDGYEYAYLKAIVLLSPDHPGLENNVQIEKF  
 QEKAYMEFQDYVTKAYPDDTYRLSRLRLPALRLMSAAITEELFFAGLIGNVQIDSIIPYILRMETADY  
 NTQIIIGHAV

>Q6B4V6\_HUMAN

MVSVNAPLGAPESSYDTSPSEGTNLNAPNSLGVLSALCAICGDRATGKHYGASSCDGCKGFFRRSVRKNH  
 MYSCRFSRQCIVDKDKRNQCRYCRLKCCFRAGMKKEAVQNERDRISTRSSYEDSSLPSINALLQAEVLS  
 RQITSPVSGINGDIRAKKIASIADVCESMKEQLLVLEWAKYIPAFCELPLDDQVALLRAHAGEHLLLGA  
 TKRSMVFKDVLGNLDYIVPRHCPELAEMSRVSIIRILDELVLFPQELQIDDNEYAYLKAIIFFDPDAKGL  
 SDPGKIKRLRSQVQVSLEDYINDRQYDSRGRFGELLLLLLPTLQSIWQMIEQIQFIKLFGMKIDNLLQE  
 MLLGGSPSDAPHAHHLHPLHMLQEHMGTNVIVANTMPTHLSNGQMCEWPRPRGQAATPETPQPSPGGSG  
 SEPYKLLPGAVATIVKPLSAIPQPTITKQEI

>Q6B4V7\_HUMAN

MVSVNAPLGAPVESSYDTSPSEGTNLNAPNSLGVSAICGDRATGKHYGASSCDGCKGFFRRSVRKNH  
 MYSCRFSRQCVDKDKRNQCRYCRLKCCFRAGMKKEAVQNERDRISTRSSYEDSSLPSINALLQAEVLS  
 RQITSPVSGINGDIRAKKIASIADVCEMKEQLLVLEWAKYIPAFCELPDQVALLRAHAGEHLLLGA  
 TKRSMVFKDVLLLGNDYIVPRHCPELAEMSRVSIIRILDELVLFPQELQIDDNEYAYLKAIIFFDPAKGL  
 SDPGKIKRLRSQVQVSLLEDYINDRQYDSRGRFGELLLLLPTLQSIWQMIQIQFIKLFGMAKIDNLLQE  
 MLLGGSPSDAPHAHPLHPLMQEHMGTNVIVANTMPHLSNGQMSTPETPQPSPPGSGSEPYKLLPGA  
 VATIVKPLSAIPQPTITKQEVI

>Q6B4V5\_HUMAN

MVSVNAPLGAPVESSYDTSPSEGTNLNAPNSLGVSAICGDRATGKHYGASSCDGCKGFFRRSVRKNH  
 MYSCRFSRQCVDKDKRNQCRYCRLKCCFRAGMKKEAVQNERDRISTRSSYEDSSLPSINALLQAEVLS  
 RQITSPVSGINGDIRAKKIASIADVCEMKEQLLVLEWAKYIPAFCELPDQVALLRAHAGEHLLLGA  
 TKRSMVFKDVLLLGNDYIVPRHCPELAEMSRVSIIRILDELVLFPQELQIDDNEYAYLKAIIFFDPAKGL  
 SDPGKIKRLRSQVQVSLLEDYINDRQYDSRGRFGELLLLLPTLQSIWQMIQIQFIKLFGMAKIDNLLQE  
 MLLGGPCQAQEGRGWSGDSPGDRPHTVSSPLSSLASPLCRFGQVA

>HNF4B\_XENLA

MDMPDYTETLDSSYTMLEFDSIRVLPNSNTEIITVETASPGLLNNGINSFCAICGDRATGKHYGASSCDGC  
 KGFFRRSVRKNHVYACRFSRQCIVDKDKRNQCRYCRLKCCFRAGMKKEAVQNERDRISMRRSSYEDNGSL  
 SINVLTAQAEAMVHQYSPVSPVHSSDISMKKVASISDVCEMKEQLLVLEWAKYIPAFCELPDQVALL  
 RAHAGAHLLLVAKRSLPYKDFLLLGNDYIMPVHCPELEIARVPCRIIDELVKPLREIQIDDNEYVCLKA  
 IIFFDPCCKGLSDQTKVKNMRFQVQVNLLEDYINDRQYDSRGRFSDILLLLPLQSIWQMIQIQVQFAKLF  
 GVARIDSLQELLLGGTMDGGQYINSGHSSLNLDLLPGPTVHSHNLHSHVIHTVSSSPETSPTNSTSE  
 DYKMNTATVSSIPLMQRTVIAKKEIL

>O77100\_AEDAE

MDINQNNHDANDSLSPHTSESFRFTPEQSVDSNKNYTLNDCQSSANNLCTICSDRATGKHYGAASCDGCK  
 GFFRRTVRKNHSTCRFSRQCVDKDKRNQCRYCRLKCCFRAGMKKEAVQNERDRISCRPSMEDIDTSN  
 GLSVKFLLLAENRSRHFGAALDDAYDGDGDLNKRKASINDVCDMSKQQLLILVEWAKSIPAFELQLDD  
 QVALLRAHAGEHLLGLSRRSMHLEEMLLGNCCIITKQSPDSKMAPNLDIRIGARIIDELVSAIKDIK  
 LDDSELACIKALVFFDPTVRGLNQPQKIKALRHQVLNLEDYVSDKQYDSRGRFGEILLLLPLQSIWQ  
 MIQQIELAKMFGVAHIDSLQEMLLGGETIENTAPPTPLNSFPNSNSPPHMSCDTTQRPSNAMEISR  
 SNPTTSSNCDAIDSESIDGANDMMAPIIEDISNYNIPQTTNSFQDENVQNYIHPSNDDVYSNQYISP  
 ASSGMHPVHASANRHQQTNVLLPVNQLSREDYKLERELKREPEANGY

>Q7YRQ4\_BOVIN

MQILYNSNDSSVPETTSMTADNGVNCLCAICGDRATGKHYGASSCDGCKGFFRRSIRKSHVYSCRFSRQ  
 CVVDKDKRNQCRYCRLKCCFRAGMKKEAVQNERDRISTRSTFDGNSIPSINTLAQAEVRSRQISVSSPC  
 ASADINVKKIASIGDVCEMKEQLLVLEWAKYIPAFCELPDQVALLRAHAGEHLLLGATKRSMYKID  
 ILLLGNNYVIHRNSCEVEISRVANRVLDELVRPFQEIQIDDNEYACLKAIFFFDPAKGLSDPVKIKNMR  
 FQVQVSLLEDYINDRQYDSRGRFGELLLLLPTLQSIWQMIQIQFVKLFGMVKIDNLLQEMLLGGASTE  
 NHLHHPMHPHLSQDPLTGQITILLGSMSTLVHTDQISTPETPLPSPQSGQEPYKIAANQASVISHQSL



>NR2E1\_ORYLA

MSKPTGSTSGCLDILNVKSSRILDIPCKVCGDRSSGKHYGVYACDGC SGFFKRSIRRNRIYLCKSGSQGG  
 CPVDKTHRNQCACRLKKCLEVNMNKDAVQHERGPRTSTIRKQVALYFRGHKEVNGSSTHFPSSSLPGPP  
 FTTTQTLEPHNLEMSSVATTPERQAIIVGLAQPTPKYPHEVSGTPMYLYEVATESVCESAARLLFMSIKW  
 AKSVPAFSTLPLSDQLILLEDAWRELFVLGIAQWAI PVDSTLLAVSGLNSENMEAQRMNKIMAEIQALQ  
 EVVTRFRQMRDATEFACLKCIIVTFKAVPTQGS AELRAFRNASAI AALQDEAQLTLNSYIHTRYPTQPCR  
 FGKLLLLLLPALRSVSPSTIEEVFFKKNIGNVPITRLLSDMYKSSDI

>Q8JHW6\_FUGRU

MSKAAGSTSGCLDILNVKSSRILDIPCKVCGDRSSGKHYGVYACDGC SGFFKRSIRRNRTYVCKSGSQGG  
 CPVDKTHRNQCACRLKKCLEVNMNKDAVQHERGPRTSTIRKQVALYFRGHKEVNGSAAHFPGSSSLPGPP  
 FTTTVAQLEPHNLDLSTVASTPERQTIIVGLAQPTPKYPHEVSGTPMYLYEVATESVCESAARLLFMSIKW  
 AKSVPAFSTLPLSDQLILLEDAWRELFVLGIAQWAI PVDPTLLAVSGMNTENTESQRMTKIMSEIQALQ  
 EVVTRFRQMRDATEFACLKCIIVTFKAVPTQGN AERFRNASAI AALQDEAQLTLNSYIHTRYPTQPCR  
 FGKLLLLLLPSLHSISPSTIEEVFFKKTIGNVPITRLLSDMYKSSDI

>Q9Y1J4\_SCHMA

MNFSETAAHQSECSIVVSQ LSTKKLTPVLCCISSNSNNIPIISQQSPNNNNNNNNNNNNVFKTDNTKQH  
 IIDQNILTKTATTTTSIVQPSELCHIQPILISSPVKNNNNNTHNLGTGSYIDSNCLSNQSNNDKSHSITPS  
 SPLLTNCNSPSTTLQSSTVCCLLRPSGRSTSTSSGSSCGSSCSGTGGGVSVSSGQYICSI CS DRASGKHY  
 GVFSCEGCKGFFKRTVRKELTYICRDSQECQIDKRLRNRCQYCRYQKCLRAGMRREAVQEERQQQLQSE  
 VQRSPTPPEQNCDSLVSNSMIMSDTKITNAMNHSCLA EKQEIMLKTTNCTSSSSPHLLSNCS DSSINYFYS  
 ASNEKSQQPSINDNFNLTVNDAATYPPQELSLIGNKDSNNVTLP LADIAHALKLP TTTTSAI PPPDALEF  
 IRTAESTISSRRKQWLSAFNKQQCHAEIAKCFQDSMENLKWLENNFEKCTTNHLPLFDLVIWSSKLPYIC  
 QLSCGVHLDLLKSACMQLIIVNLVYWLANDHKPRSLSTSNSTSKLPD TTTPTINSTDISNITDDPPENSIS  
 DISKDCTIQMKKINKSVPLDEKMDYYSNFPEFHLLNNTKPM DNNNNDSSISKPTNINDNSVDDDMIRK  
 RNTNVYKLIYNLAIKLRMLNLDPVELGCLKLILLNLPDSMTCLNNIRSLIELLRDQVYAGLYKYNQVWP  
 NAPHGRMGRLLLKLSNFQSVAAARIEKLI CSNELNLLNLESIFS YLSKKKVDHSNYISTTTTTTTTMS  
 TTTSTSNSIHLEFS

>NR2E1\_MOUSE

MSKPAGSTSRILDIPCKVCGDRSSGKHYGVYACDGC SGFFKRSIRRNRTYVCKSGNQGCPVDKTHRNQC  
 RACRLKKCLEVNMNKDAVQHERGPRTSTIRKQVALYFRGHKEDNGAAAHFPSTALPAPAFFTAVTQLEPH  
 GLELA AVSATPERQTLVSLAQPTPKYPHEVNGTPMYLYEVATESVCESAARLLFMSIKWAKSVPAFSTLS  
 LQDQLMLLEDAWRELFVLGIAQWAI PVDANTLLAVSGMNTDNTDSQKLNKIISEIQALQEVVARFRQLRL  
 DATEFACLKCIIVTFKAVPTHSGSELRSFRNAAAIAALQDEAQLTLNSYIHTRYPTQPCRFGKLLLLLLPAL  
 RSISPSTIEEVFFKKTIGNVPITRLLSDMYKSSDI

>HNF4G\_MOUSE

MNTTDSGVNCLCAICGDRATGKHYGASSCDGCKGFFRRSIRKSHVYSCRFSRQC VVDKDRNQCRYCRLR  
 KCFRAGMKKEAVQNERDRISTRSTYEGSNIPSINTLAQAEVRSCQISVPSPSSSTDINIKKIASISDVC  
 ESMKQQLLVLEWAKYIPAFCELPDLDQVALLRAHAGEHLLLGATKRSMYKDILLGNHYVIHRNSCEV  
 EVSRVANRVLDELVRPFQEIQIDDNEYACLKAI VFFDPDAKGLSDPVKIKNMRQVQISLEDYINDRQYD  
 SRGRFGELLLLLLPTLQSITWQMIEQIQFVKLFGMVKIDNLLQEMLLGGAANDGSHLHPMPHLSQDPLT



GQTILLGPMSTLVHTDQIATPETPLPSPPPQSGSQEYKITANQASVISHQSLSKQKQL

>Q7Z2V9\_HUMAN

MNTTDNGVNCLCAICGDRATGKHYGASSCDGCKGFFRRSIRKSHVYSCRFSRQCVDKDKRNQCRYCRLR  
 KCFRAGMKKEAVQNERDRISTRSTFDGNSNIPINTLAQAEVRSRQISVSSPGSSTDINVKKIASIGDVC  
 ESMKQQLLVLEWAKYIPAFCELPDQVALLRAHAGEHLLLGATKRSMYKDILLGNVYIHRNSCEV  
 EISRVANRVLDELVRPFQEIQIDDNEYACLKAIVFFDPDAKGLSDPVKIKNMRQVQIGLEDYINDRQYD  
 SRGRFGELLLLLPTLQSIWQMIQIQFVKLFGMVKIDNLLQEMLLGGASNDGSHLHHPMHPHLSQDPLT  
 GQTILLGPMSTLVHADQISTPETPLPSPPPQSGSQEQYKIAANQASVISHQHLKQKQL

>NR2E1\_CHICK

MSKPAGSTSRILDIPCKVCGDRSSGKHYGVYACDGCSGFFKRSIRRNRTYVCKSGNQGGCPVDKTHRNQC  
 RACRLKKCLEVNMNKDAVQHERGPRTSTIRKQVALYFRGHKEESSGAPHFPATALPAPAFFTAVSQLEPH  
 GLELAAVAGTPERQALVGLAQPTPKYPHEVNGTPMYLYEVATESVCESAARLLFMSIKWAKSVPAFSTLS  
 LQDQLMLLEDARELFLVGLIAQWAIIPVDANTLLAVSGMNGDNTDSQKLNKIISEIQALQEVVARFRQLRL  
 DATEFACLKCIIVTFKAVPTHSGSELRSFRNAAAIAALQDEAQLTLNSYIHTRYPTQPCRFGKLLLLLPPAL  
 RSISPSTIEEVFFKKTIGNVPITRLLSDMYKSSDI

>NR2E1\_HUMAN

MSKPAGSTSRILDIPCKVCGDRSSGKHYGVYACDGCSGFFKRSIRRNRTYVCKSGNQGGCPVDKTHRNQC  
 RACRLKKCLEVNMNKDAVQHERGPRTSTIRKQVALYFRGHKEENGAAHFPSAALPAPAFFTAVTQLEPH  
 GLELAAVSTTPERQTLVSLAQPTPKYPHEVNGTPMYLYEVATESVCESAARLLFMSIKWAKSVPAFSTLS  
 LQDQLMLLEDARELFLVGLIAQWAIIPVDANTLLAVSGMNGDNTDSQKLNKIISEIQALQEVVARFRQLRL  
 DATEFACLKCIIVTFKAVPTHSGSELRSFRNAAAIAALQDEAQLTLNSYIHTRYPTQPCRFGKLLLLLPPAL  
 RSISPSTIEEVFFKKTIGNVPITRLLSDMYKSSDI

>HNF4G\_HUMAN

MNTTDNGVNCLCAICGDRATGKHYGASTCDGCKGFFRRSIRKSHIYSCRFSRQCVDKDKRNQCRYCRLR  
 KCFRAGMKKEAVQNERDRISTRSTFDGNSNIPINTLAQAEVRSRQISVSSPGSSTDINVKKIASIGDVC  
 ESMKQQLLVLEWAKYIPAFCELPDQVALLRAHAGEHLLLGATKRSMIYKDILLGNVYIHRNSCEV  
 EISRVANRVLDELVRPFQEIQIDDNEYACLKAIVFFDPDAKGLSDPVKIKNMRQVQIGLEDYINDRQYD  
 SRGRFGELLLLLPTLQSIWQMIQIQFVKLFGMVKIDNLLQEMLLGGASNDGSHLHHPMHPHLSQDPLT  
 GQTILLGPMSTLVHADQISTPETPLPSPPPQSGSQEQYKIAANQASVISHQHLKQKQL

>Q8MX79\_BRAFL

MMPNSVLFTPGSGDTPQELCVVCGDKASGRHYGAISCEGCKGFFKRSIRKNLGYVCRSSKECPINKHH  
 RNRCQYCRQLQKCLSVGMRSESVQCERKPLDPTARERPPNCATSTEKIYIRKDLRSPLAATPTFVTEREPK  
 SGGLFDAGMLANIQQGDSNAPILLAVDPTKSDGKEGDGNTDLSTLANVVTTLASMSKNKEGQAQQNGGEG  
 DAAISGDGTVMVQTSSTDISKAFDNLTKALNTSQTGEQGITSQSGQMEGTSDDQDQTTVIELEGPLLTDA  
 HTAFKLTTPSPMPEFLNVHYICESASRLFLTMHWARSIPAFQALGQECHTGLVRVCWSELFTLGLSQCS  
 AVMSLPTILTAVNHLQSSVQADKLSADRVKVMMEHIWKLQEFINKMAALTVDPTHEYAYMKAVLFDSTDH  
 PGLLNPRQIEKFQEKAHEELKEYEAQAHPDDTERFAKLLLRPALRLLSPSIMEELFFAGLIGNVQIDSI  
 IPYILRMETADYNSQIGGTSQ

>Q90WV5\_CHICK

MAASPAGSVVSAGLEDSPSGLSPAPGKALSPVLLCKVCGDTSSGKHYGIYACNGCSGFFKRSVRRKLIYR  
 CQAGTGLCPVDKAHRNQCQACRLKKCLQAGMNKDAVQNERQPRSTAQVRLDSIELDAELPPEHVAATR  
 PPVPCPAPRGHGATAATAAVPRTPTPTNHRFMASLMTAETCAKLEPEDVDETVDVTGGEPERAGGEYQV  
 APYPAAGPENVIYETSARLLFMAVKWAKNLPVFSNLPFRDQVILLEEAWSELFLLCAIQWSMPLESCPLLA  
 VPEPSPGKLLPAAVDVRAEQETLGRFKALAVDPTEFACMKAVVLFKPETRGLKDPEQVENLQDQSQVMLG  
 QHNRSHYPGQPVRFGKLLLLLPPALRFLSSSERVELLFFRRTIGNTPMEKLLCDMFKN

>NR2E1\_XENLA

MSNPTGSTSRILDIPCKVCGDRSSGKHYGVYACDGC SGFFKRSIRRNRSYVCKSGNQGGCPVDKTHRNQC  
 RACRLKKCLEVNMNKDAVQHERGPRTSTIRKQVALYFRGHKEVNGSTQHFSSTALPTPTFTTTRVQLEAH  
 NLELAAISTVPERQTLVGLAQPTPKYPHEVNGAPLYLYEFATESVCE SAARLLFMSIKWAKSVPAFSTLS  
 LQDQLMLLEDAWRELFVLGIAQWAI PVDASTLLAVSGMNNENTESPKNKI ISEIQALQDVVSRFRQLRL  
 DATEFACLKCI VTFKAGVSTHSGSELNFRNAAAISALQDEAQLTLNSYIHTRYPTQPCRFGKLLLLLPA  
 LRSINPSTIEEVFFKKTIGNVPI TRVLSDMYKSSDI

>Q9VP28\_DROME

MDGVKVFETFIKSEENRAMPLIGGGSASGGTPLPGGGVGMGAGASATLSVELCLVCGDRASGRHYGAISCE  
 GCKGFFKRSIRKQLGYQCRGAMNCEVTKHHRNRCQFCRLQKCLASGMRTVQHERKPIVDRKEGIIAAAGS  
 SSTSGGGNGSSTYLSGKSGYQOGRGKHSVKAESAATPPVHSAPATAFNLNENIFPMGLNFAELTQTLMF  
 ATQQQQQQQQHQQSGSYSPDIPKADPEDDEDDSDMNSSTLCLQLLANSASNNNSQHLNFNAGEVPTALP  
 TTSTMGLIQSSLDMRVIHKGLQILQPIQNQLERNGNLSVKPECDSEAEDSGTEDAVDAELEHMELDFECG  
 GNRSGGSDFAINEAVFEQDLLTDVQCAFHVQPPTLVHSYLNHYVCETGSRIIFLTIHTLRKVPVFEQLE  
 AHTQVKLLRGVWPALMAIALAQCGQLSVPTIIGQFIQSTRQLADIDKIEPLKISKMANLTRTLHDFVQE  
 LQSLDVTDMEFLLRLILLFNPTLLQQRKERSLRGYVRRVQLYALSSLRQGGIGGGEERFNVLVARLLP  
 LSSLDAEAMEELFFANLVGMQMDALIPFILMNTSNTSGL

>HR78\_DROME

MDGVKVFETFIKSEENRAMPLIGGGSASGGTPLPGGGVGMGAGASATLSVELCLVCGDRASGRHYGAISCE  
 GCKGFFKRSIRKQLGYQCRGAMNCEVTKHHRNRCQFCRLQKCLASGMRSDSVQHERKPIVDRKEGIIAAA  
 GGSSTSGGGNGSSTYLSGKSGYQOGRGKHSVKAESAATPPVHSAPATAFNLNENIFPMGLNFAELTQTL  
 MFATQQQQQQQQHQQSGSYSPDIPKADPEDDEDDSDMNSSTLCLQLLANSASNNNSQHLNFNAGEAPTA  
 LPPTSTMGLIQSSLDMRVIHKGLQILQPIQNQLERNGNLSVKPECDSEAEDSGTEDAVDAELEHMELDFE  
 CGGNRSGGSDFAINEAVFEQDLLTDVQCAFHVQPPTLVHSYLNHYVCETGSRIIFLTIHTLRKVPVFEQ  
 LEAHTQVKLLRGVWPALMAIALAQCGQLSVPTIIGQFIQSTRQLADIDKIEPLKISKMANLTRTLHDFV  
 QELQSLDVTDMEFLLRLILLFNPTLLQQRKERSLRGYVRRVQLYALSSLRQGGIGGGEERFNVLVARL  
 LPLSSLDAEAMEELFFANLVGMQMDALIPFILMNTSNTSGL

>TLL\_DROVI

MQSSEGPSMDMDQKYNVRLSPAASSRILYHVPCVKCRDHSSGKHYGIYACDGCAGFFKRSIRRSRQYVC  
 KSQKQGLCVVDKTHRNQCRACRLRKCFEVGMNKDAVQHERGPRNSTLRRHMAMYKDAMMGAAEMPQIPPE  
 ILMNTAALTGFPLPMPMPGVQRSHHHAALSAAFQPPPSAAVLDLSVPRVPHHPVHQHHGFFSPTAAYM  
 NALATRALPPTPLMAAEHIKETAAEHLFKNVNWIKSVRAFTELPMPDQLLLLEESWKEFFILAMAQYLM  
 PMNFAQLLFVYESENANREIVTIVAREVHAFQAVPNRLCHLNIDSTEYECLRAISLFRKSPPAASSTEDL

ANSSILTGSGSPNSSASAESRGLLESSKVAAMHNDARNALHNYISRTHPNQPLRFQTLGVTLMHKVSS  
FTIEELFFRKTIGDITIVRLISDMYSQRKI

>Q9VML1\_DROME

MGTAGDRLLDIPCKVCGDRSSGKHYGIYSCDGC SGFFKRSIHRNRIYTCKATGDLKGRCPVDKTHRNOCR  
ACRLAKCFQSAMNKDAVQHERGPRKPKLHPQLHHHHHHAAAAAAAAAHAAAAHHHHHHHHHAAAAHHA  
AVAAAAASGLHHHHHAMPVSLVTNVSASFNYTQHISTHPAPAAPPSGFHLTASGAQQGPAPPAGHLHHG  
GAGHQHATAFHHPGHGHALPAPHGVSNSPGGNSSAISGSGPGSTLPPSHLLHHNLIAEAASKLPGITA  
TAVAAVVSSTSTPYASAAQTSSPSSNNHNYSSPSPSNSIQSISSIGSRSGGEEGLSLGSESPRVNVETE  
TPSPSNSPPLSAGSISPAPTLTSSSGSPQHRQMSRHSLEATTPPSHASLMICASNNNNNNNNNNNGEH  
KQSSYTSGSPTPTPTPPPPRSGVGSTCNTASSSSGFLELLLSPKCQELIQYQVQHNTLLFPQQLDSR  
LLSWEMLQETTARLLFMAVRWVKLMPFQTLKNDQHLLQESWKELFLLNLAQWTIPLDLTPILESPLI  
RERVLQDEATQTEMKTIQEILCRFRQITPDGSEVGCMAIALFAPETAGLCDVQPVEMLQDQAQCILSDH  
VRLRYPRQATRFGRLLLPLSLRTIRAATIEALFFKETIGNVPIARLLRDMYTMEPAQVVK

>Q5U7E0\_MUSDO

MQTTEGSPDIMDQKYNVRLSPAASSRILYHVPCVKCRDHSSGKHYGIYACDGCAGFFKRSIRRSRQYVC  
KSQKQGLCVVDKTHRNOCRACRLRKCFEVMNKDAVQHERGPRNSTLRRHMAMYKDAMMGSEMPQIPAE  
ILMNTAALTGFPLPMPIPGSHMHPSLAGAFPAPPSVLDLSVPRVPQHPMHQAHPGFFAPTAAVMNALA  
ATRVLPPTPPLMAAEHIKETA AEHLFKNINWIKNVPSFGELPLPDQLQLLEDSWKEFFILAMAQYLMPMN  
FTQLLFVYESENPNRDVTGLVTREVFHAFQDVLNQLCHLNIDSHEYELIRALTLFRRPGSDDLANSLSLTS  
NGSPNSSISAESRGLIESTKIAALHDES RNALIGYIARLHPGQPMRFQSIMSVLTQMHKVSSFAIEELFF  
RKTIGDITIVRLIGDMYSQRKI

>Q86PK5\_CAEEL

MTLEEKEEVSTSTSQSPQSSSFENVFCAICGDRATGKHYGAMSCDGCCKGFFRRTIRKRHSYVCRFGEKQ  
VDKAKRNSCRKCRFDVCLRKGMRRDAVQTERDRIRPANPLSNGSNGGIVPDDPLLDTLIRAEASTRGLRT  
TVITKTAEARKQATTNDVTD SMNQQLTLMVEWAKVLEGFQVRDNIQVALLRHFS AQHLMCAAFRSIHL  
SDAVWLTNETCLHKDSPKIPDMNRVAERIIDQVTNPMRSLHMNEIEYIALKAIFFDPLAKGITSESYSD  
VEEMRQRILESFERHVRYVSPYKDMPLRFANLLLLLPPMLAISRD LVEDVQLAKLFGLASIDNLMLELML  
PNEGKNTTDKTSPPIMCHQ

>Q61WY2\_CAEER

MTPVDKEEPATSSSTSQSPNSFENVFCAICGDKATGKHYGALSCDGCCKGFFRRTIRKHHSYVCRFGEKQV  
DKAKRNSCRKCRFDVCIRKGMKRDAVQTERDRIRPLNVFLNGKLTEDPLETLQRAEQATRGLRTTVITK  
TSEARKQATTVDVTD SMNQQLRLMVEWAKMLEGFIRVDCITQAALLRHFS AQHLMCAAFRSIHLSDAVW  
LTNETCLHKDSPKIPDMNRVAERIIDQVTTPMRQLHMSEIEYIALKAITFFDPLAKGISSESHGDVEDMR  
QKILEAFERHVRFS SPHKDMPLRFANLLLLLPPMLAISRD LVEDVQLAKLFGLASIDDLMLLELMLPNEKS  
VGS DKGESPLTGQQ

>Q8IVZ9\_HUMAN

MCPVDKAHRNQCACRLKCKLQAGMNQDAVQNERQPRSTAQVHLDSMESNTESRPESLVAPPAPAGRSR  
GPTPMSAARALGHFMASLITAETCAKLEPEDADENIDVTSNDPEFPSSPYSSSSPCGLDSIHETSARLL  
FMAVKWAKNLPVFS SLPFRDQVILLEEAWSELFLLGAIQW SLPDSCPL LAPPEASAAGGAQGRLLTASM

ETRVLQETISRFRALAVDPTEFACMKALVLFKPESTRGLKDPEHVEALQDQSQVMLSQHSKAHHPSQPVRF  
GKLLLLLPSLRFITAEIRIELLFFRKTIGNTPMEKLLCDMFKN

>Q688B5\_CAEEEL

MIFFQNFHDHTKLIKIPKNQFLSKFQLFPHTFPFFDSKTVLFSSEMTLEEKEEVSTSTSQSPQSSSFENVFC  
AICGDRATGKHYGAMSCDGCKAKRNSCRKCRFDVCLRKGMRRDAVQTERDRIRPANPLSNGSNGGIVPDD  
PLLDTLIRAEASTRGLRRTTVITKTAEARKQATTNDVTDSDMNQQQLTMVEWAKVLEGFQVRDNIQVALLR  
HFSAQHLVMCAAFRSIHLSDAVWLTNETCLHKDSPKIPDMNRVAERIIDQVTNPMRSLHMNEIEYIALKA  
IAFFDPLAKGITSESYSDVEEMRQRILESFERHVRYVSPYKDMPLRFANLLLLLPPMLAISRDIVEDVQL  
AKLFLGLASIDNLMLELMLPNNEGKNTTDDKTSPPIMCHQ

>O77101\_AEDAE

MDINQNTVQNERDRISCRRPSPMEDIDTSNGLSVKFLLLAENRSRHFGAALDDAYDGDGDLNKRFAASIND  
VCDSMKQQLLILVEWAKSIPAFaelQLDDQVALLRAHAGEHLLGLSRRSMHLEEMLLLGNNCIITKQSP  
DSKMAPNLDISRIGARIIDELVSAIKDIKDDSELACIKALVFFDPTVRGLNQPQKIKALRHQVLNNLED  
YVSDKQYDSRGRFGEILLLLPVLSITWQMIQQIELAKMFGVAHIDSLQEMLLGGETIENTAPPTPLN  
SFPNSSNSPPHMMSCDTTQRPSNAMEISRSNPTTSSNCAIDSESIDGANDMMAPAIIEDISNYNIPQT  
TNSFORDENVQNYIHPSNDDVYSNQYISPASSGMHPVHASANRHQQTNVLLPVNQLSREDYKLERELKR  
EPEANGY

>Q86PK4\_CAEEEL

MTLEEKEEVSTSTSQSPQSSSFENVFCAICGDRATGKHYGAMSCDGCKAKRNSCRKCRFDVCLRKGMRRD  
AVQTERDRIRPANPLSNGSNGGIVPDDPLLDTLIRAEASTRGLRRTTVITKTAEARKQATTNDVTDSDMNQQ  
LTMVEWAKVLEGFQVRDNIQVALLRHFSAQHLVMCAAFRSIHLSDAVWLTNETCLHKDSPKIPDMNRV  
AERIIDQVTNPMRSLHMNEIEYIALKAIAFFDPLAKGITSESYSDVEEMRQRILESFERHVRYVSPYKDM  
PLRFANLLLLLPPMLAISRDIVEDVQLAKLFLGLASIDNLMLELMLPNNEGKNTTDDKTSPPIMCHQ

### (3) 148 NR3

>GCR\_SAISC

MDSKESLTPGKEENPSSVLTQERGNVMDFKILRGGATLKVSVSSTSLAAASQSDSKQRRLLVDFPKGSV  
SNAQQPDLKAVSLSMGLYMGETETKVMGNDLGFPQQGQISLSSGETDLQLEESIANLNRSTVPEPK  
SSASSSVSAAPKEKEFPKTHSDVSSEQQNLKGQTGTNGGNVKLYTADQSTFDILQDLEFSSGSPGKETNQ  
SPWKSDDLIDENCLLSPLAGEEDSFLLEGNSNEDCKPLILPDTKPKIKDNGDLVLSSSSNVTLPQVKTEK  
EDFIELCTPGVIKQEKLSVYQCASFPGANIIGNKMSAISIHGVSTSGGQMYHYDMNTASLSQQDQKPI  
FNVIPPIPVGSENWNRQCQSGDDNLTSLGTLNFPGRTVFSNGYSSPSMRPDVSSPPSSSSTATGPPPKL  
CLVCSDEASGCHYGVLTCGSCKVFFKRAVEGQHNYLCAGRNDICIIDKIRKNCPCRYRKCLQAGMNLEA  
RKTKKKIKIGIQQATTGVSQETSENANKTIVPATLPQLTPTLVSLLEVIEPEVLYAGYDSTVPDSTWRI  
MTTLNMLGGRQVIAAVKAKAIPGFRNLHLDDQMTLLQYSWMFLMAFALGWSYRQASSNLLCFAPDLII  
NEQRMTLPCMYDQCKHMLYVSSSELHRLQVSYEYLCMKTLLLLSSVPKDGLKSQELFDEIRMTYIKELGK  
AIVKREGNSSQNWQRFYQLTKLLDSMHEVENLLNYCFQTFLDKTMSEIFPEMLAEIITNQLPKYSNGNI  
KLLLFHQK

>GCR\_HUMAN

MDSKESLTPGREENPSSVLAQERGDVMDFYKTLRGGATVKVSASSPSLAVASQSDSKQRRLLVDFPKGSV

SNAQQPDLKAVSLSMGLYMGETETKVMGNDLGFPPQQGQISLSSGETDLKLEESIANLNRSTSVPENPK  
 SSASTAVSAAPEKEFEFKTHSDVSSEQQHLKGQTGTNGGNVKLYTTDQSTFDILQDLEFSSGSPGKETNE  
 SPWRSDLLIDENCLLSPLAGEEDSFLLLEGNSNEDCKPLILPDTKPKIKDNGDLVLSSPSNVTLFPQVKTEK  
 EDFIELCTPGVIKQEKLGTVYQCASFPGANIIGNKMSAISVHGVSTSGGQMYHYDMNTASLSQQDQKPI  
 FNVIPPIPVGSENWNRQCQSGDDNLTSLGTLNFPGRTVFSNGYSSPSMRPDVSSPPSSSSTATTGPPPKL  
 CLVCSDEASGCHYGVLTCGSCKVFFKRAVEGQHNYLCAGRNDICIIDKIRRKNCPACRYRKCLQAGMNLEA  
 RKTKKKIKGIQQATTGVSQETSENPKNKTIVPATLPQLTPTLVSLLEVIEPEVLYAGYDSSVPDSTWRIM  
 TTLNMLGGRQVIAAVKWAKAIPGFRNLHLDDQMTLLQYSWMFLMAFALGWRYSYRQSSANLLCFAPDLIIN  
 EQRMTPCMYDQCKHMLYVSSSELHRLQVSYEEYLCMKTLLLLSSVPKDGLKSQELFDEIRMTYIKELGKA  
 IVKREGNSSQNWRQRYQLTKLLDSMHEVVENLLNYCFQTFLDKTMSEIEFPEMLAEIITNQIPKYSNGNIK  
 KLLFHQK

>GCR\_SAIBB

MDSKESLTPGKEENPSSVLTQERGNVMDFCILRGGATLKVSVSSTSLAAASQSDSKQQRLLVDFPKGSV  
 SNAQQPDLKAVSLSMGLYMGETETKVMGNDLGFPPQQGQISLSSGETDLQLEESIANLNRSTSVPENPK  
 SSASSSVSAAPEKEFEFKTHSDVSSEQQNLKGQTGSNGGNVKLYTADQSTFDILQDLEFSSGSPGKETNQ  
 SPWKSDDLIDENCLLSPLAGEEDSFLLLEGNSNEDCKPLILPDTKPKIKDNGDLVLSSSNVTLFPQVKTEK  
 EDFIELCTPGVIKQEKLSTVYQCASFPGANIIGNKMSAISIHGVSTSGGQMYHYDMNTASLSQQDQKPI  
 FNVIPPIPVGSENWNRQCQSGDDNLTSLGTLNFPGRTVFSNGYSSPSMRPDVSSPPSSSSTATTGPPPKL  
 CLVCSDEASGCHYGVLTCGSCKVFFKRAVEGQHNYLCAGRNDICIIDKIRRKNCPACRYRKCLQAGMNLEA  
 RKTKKKIKGIQQATTGVSQETSENPANKTIVPATLPQLTPTLVSLLEVIEPEVLYAGYDSTVPDSTWRIM  
 TTLNMLGGRQVIAAVKWAKAIPGFRNLHLDDQMTLLQYSWMFLMAFALGWRYSYRQASSNLLCFAPDLIIN  
 EQRMTPCMYDQCKHMLYVSSSELHRLQVSYEEYLCMKTLLLLSSVPKDGLKSQELFDEIRMTYIKELGKA  
 IVKREGNSSQNWRQRYQLTKLLDSMHEVVENLLNYCFQTFLDKTMSEIEFPEMLAEIITNQIPKYSNGNIK  
 KLLFHQK

>GCR\_AOTNA

MDSKESLTPGKEENPSSVLTQERGNVMDFSKILRGGATLKVSVSSTSLAAASQSDSKQQRLLVDFPKGSV  
 SNAQQPDLKAVSLSMGLYMGETETKVMGNDLGFPPQQGQISLSSGETDLQLEESIANLNRSTSVPENPK  
 SSASSSVSAAPEKEFEFKTHSDVSSEQQNLKGQTGTNGGNVKLYTADQSTFDILQDLEFSSGSPGKETNQ  
 SPWRSDLLIDENCLLSPLAGEEDSFLLLEGNSNEDCKPLILPDTKPKIKDNGDLVLSSSNVTLFPQVKTEK  
 EDFIELCTPGVIKQEKLSTVYQCASFPGANVIGNKMSAISIHGVSTSGGQMYHYDMNTASLSQQDQKPI  
 FNVIPPIPVGSENWNRQCQSGDDNLTSLGTLNFPGRTVFSNGYSSPSMRPDVSSPPSSSSTATTGPPPKL  
 CLVCSDEASGCHYGVLTCGSCKVFFKRAVEGQHNYLCAGRNDICIIDKIRRKNCPACRYRKCLQAGMNLEA  
 RKTKKKIKGIQQATTGVSQETSENPANKTIVPATLPQLTPTLVSLLEVIEPEVLYAGYDSTVPDSTWRIM  
 TTLNMLGGRQVIAAVKWAKAIPGFRNLHLDDQMTLLQYSWMFLMAFALGWRYSYRQASSNLLCFAPDLIIN  
 EQRMTPCMYDQCKHMLYVSSSELHRLQVSYEEYLCMKTLLLLSSVPKDGLKSQELFDEIRMTYIKELGKA  
 IVKREGNSSQNWRQRYQLTKLLDSMHEVVENLLNYCFQTFLDKTMSEIEFPEMLAEIITNQIPKYSNGNIK  
 KLLFHQK

>Q6N0A4\_HUMAN

MDSKESLTPGREENPSSVLAQERGDVMDFYKTLRGGATVKVSASSPSLAVASQSDSKQQRLLVDFPKGSV  
 SNAQQPDLKAVSLSMGLYMGETETKVMGNDLGFPPQQGQISLSSGETDLKLEESIANLNRSTSVPENPK  
 SSASTAVSAAPEKEFEFKTHSDVSSEQQHLKGQTGTNGGNVKLYTTDQSTFDILQDLEFSSGSPGKETNE

SPWRSDLLIDENCLLSPLAGEDDSFLLLEGNSNEDCKPLILPDTKPKIKDNGDLVLSSPSNVTLQPVKTEK  
 EDFIELCTPGVIKQEKLGTVYQCASFPGANIIGNKMSAISVHGVSTSGGQMYHYDMNTASLSQQDQKPI  
 FNVIPPIPVGSENNWRCQGSDDNLTSLGTLNFPGRTVFVSNGYSSPSMPDVSSPPSSSSSTATTGPPPKL  
 CLVCSDEASGCHYGVLTCGSCVFFKRAVEGQHNYLCAGRNDICIIDKIRRNKCPACRYRKCLQAGMNLEA  
 RKTKKKIKIGIQQATTGVSQETSENPNGKTIVPATLPQLTPTLVSLLEVIEPEVLYAGYDSSVPDSTWRIM  
 TTLNMLGGRQVIAAVKWAKAIPGFRNLHLDDQMTLLQYSWMFLMAFALGWRYSYRQSSANLLCFAPDLIIN  
 EQRMTLPCMYDQCKHMLYVSSSELHRLQVSYEEYLCMKTLTLLSSVPKDGLKSQELFDEIRMTYIKELGKA  
 IVKREGNSSQNWRFYQLTKLLDSMHEVVENLLNYCFQTFLDKTMSEFPEMLAEIITNQIPKYSNGNIK  
 KLLFHQK

>GCR\_SAGOE

MDSKESLTPGKEENPSSVLTQERGNVMDFCILRGGATLKVSVSSTSLAAASQSDSKQQRLLVDFPKGSV  
 SNAQQPDLKAVSLMGLYMGETETKVMGNLGFPPQQQISLSSGETDLQLLEESIANLNRSTVPEPK  
 SSASSSVSAAPKEKEFPKTHSDVSSEQQNLKGQGTGTNGNAKLCTADQSTFDILQDLEFSSGSPGKETNQ  
 SPWRSDLLIDENCLLSPLAGEEDSFLLLEGNSNEDCKPLILPDTKPKIKDNGDLVLSSSNVTLPQVKTEK  
 EDFIELCTPGVIKQEKLSTVYQCASFPGANIIGNKMSAISIHGVSTSGGQMYHYDMNTASLSQQDQKPI  
 FNVIPPIPVGSENNWRCQGSDDNLTSLGTLNFPGRTVFVSNGYSSPSMRPDVSSPPSSSSSTATTGPPPKL  
 CLVCSDEASGCHYGVLTCGSCVFFKRAVEGQHNYLCAGRNDICIIDKIRRNKCPACRYRKCLQAGMNLEA  
 RKTKKKIKIGIQQATTGVSQETSENPANKTIVPATLPQLTPTLVSLLEVIEPEVLYAGYDSTVPDSTWRIM  
 TTLNMLGGRQVIAAVKWAKAIPGFRNLHLDDQMTLLQYSWMFLMAFALGWRYSYRQASSNLLCFAPDLIIN  
 EQRMTLPCMYDQCKHMLYVSSSELHRLQVSYEEYLCMKTLTLLSSVPKDGLKSQELFDEIRMTYIKELGKA  
 IVKREGNSSQNWRFYQLTKLLDSMHEVVENLLNYCFQTFLDKTMSEFPEMLAEIITNQIPKYSNGNIR  
 KLLFHQK

>Q6XLJ0\_CALJA

MDSKESLTPGKEENPSSVLTQERGNVMDFCILRGGATLKVSVSSTSLAAASQSDPKQQRLLVDFPKGSV  
 SNVQQPDLKAVSLMGLYMGETETKVMGNLGFPPQQQISLSSGETDLQLLEESIANLNRSTVPEPK  
 SSASSSVSAAPKEKEFPKTHSDVSSEQQNLKGQGTGTNGNVKLYTADQSTFDILQDLEFSSGSPGKERNQ  
 SPWRSDLLIDENCLLSPLAGEEDSFLLLEGNSNEDCKPLILPDTKPKIKDNGDLVLSSSNVTLPQVKTEK  
 EDFIELCTPGVIKQEKLSTVYQCASFPGANIIGNKMSAISIHGVSTSGGQMYHYDMNTASLSQQDQKPI  
 FNVIPPIPVGSENNWRCQGSDDNLTSLGTLNFPGRTVFVSNGYSSPSMRPDVSSPPSSSSSTATTGPPPKL  
 CLVCSDEASGCHYGVLTCGSCVFFKRAVEGQHNYLCAGRNDICIIDKIRRNKCPACRYRKCLQAGMNLEA  
 RKTKKKIKIGIQQATTGVSQETSENPANKTIVPATLPQLTPTLVSLLEVIEPEVLYAGYDSTVPDSTWRIM  
 TTLNMLGGRQVIAAVKWAKAIPGFRNLHLDDQMTLLQYSWMFLMAFALGWRYSYRQASSNLLCFAPDLIIN  
 EQRMTLPCMYDQCKHMLYVSSSELHRLQVSYEEYLCMKTLTLLSSVPKDGLKSQELFDEIRMTYIKELGKA  
 IVKREGNSSQNWRFYQLTKLLDSMHEVVENLLNYCFQTFLDKTMSEFPEMLAEIITNQIPKYSNGNIK  
 KLLFHQK

>Q5R7M7\_PONPY

MDSKESLTPGREENPSSVLAQERGNVMDFYKTLRGGATVKVSASSPSLAVASQSDSKQRRLLVDFPKGSV  
 SNAQQPDLKAVSLMGLYMGETETKVMGNLGFPPQQQISLSSGETDLKLLLEESIANLNRSTVPEPK  
 SSASTAVSAAPTEKEFPKTHSDISSEQQHLKGQGTGTNGNVKLYTTDQSTFDILQDLEFSSGSPGKETNE  
 SPWRSDLLIDENCLLSPLAGEDDSFLLLEGNSNEDCKPLILPDTKPKIKDNGDLVLSSPSNVTLQPVKTEK  
 EDFIELCTPGVIKQEKLGTVYQCAGFPGANIIGNKMSAISVHGVSTSGGQMYHYDMNTASLSQQDQKPI

FNVIPPIPVGSENNWRCQGSDDNLTSLGTLNFPGRTVFSNGYSSPSMRPDVSSPPSSSSSTATTGPPPKL  
 CLVCSDEASGCHYGLVTCGSCVKVFFKRAVEGRQHNYLCAGRNDICIIDKIRRKNCPCACRYRKCLQAGMNLE  
 ARKTKKKIKIGIQQATTGVSQETPENPANKTIVPATLPLQTLPTLVSLLEVIEPEVLYAGYDSSVPDSTWRI  
 MTTLNMLGGRQVIAAVKWAKAIPGFRNLHLDDQMTLLQYSWMFLMAFALGWRSYRQSSANLLCSAPDLII  
 NEQRMTLPCMYDQCKHMLYVSSSELHRLQVSYEEYLCMKTLTLLSSVPKDGLKSQELFDEIRMTYIKELGK  
 AIVKREGNSSQNWRQRYQLTKLLDSMHEVVENLLNYCFQTFLDKTMSIEFPEMLAEIITNQIPKYSNGNI  
 KLLLFHQK

>Q5R9P5\_PONPY

MDSKESLTPGREENPSSVLAQERGNVMDFYKTLRGGATVKVSASSPSLAVASQSDSKQRRLLVDFPKGSV  
 SNAQQPDLKAVSLMGLYMGETETKVMGNDLGFPPQQQISLSSGETDLKLEESIANLNRSTVPENPK  
 SSASTAVSAAPEKEFPKTHSDISSEQQHLKGQTGTNGGNVKLYTTDQSTFDILQDLEFSSGSPGKETNE  
 SPWRSDDLIDENCLLSPLAGEDDSFLLLEGNSNEDCKPLILPDTKPKIKDNGDLVLSPPSNVTLQVQKTEK  
 EDFIELCTPGVIKQEKLGTVYCQAGFFGANIIGNKMSAISVHGVSTSGGQMYHYDMNTASLSQQDQKPI  
 FNVIPPIPVGSENNWRCQGSDDNLTSLGTLNFPGRTVFSNGYSSPSMRPDVSSPPSSSSSTATTGPPPEL  
 CLVCSDEASGCHYGLVTCGSCVKVFFKRAVEGRQHNYLCAGRNDICIIDKIRRKNCPCACRYRKCLQAGMNLEA  
 RKTKKKMKIGIQQATTGVSQETPENPANKTIVPATLPLQTLPTLVSLLEVIEPEVLYAGYDSSVPDSTWRI  
 TTNMLGGRQVIAAVKWAKAIPGFRNLHLDDQMTLLQYSWMFLMAFALGWRSYRQSSANLLCFAPDLIIN  
 EQRMTLPCMYDQCKHMLYVSSSELHRLQVSYEEYLCMKTLTLLSSVPKDGLKSQELFDEIRMTYIKELGKA  
 IVKREGNSSQNWRQRYQLTKLLDSMHEVVENLLNYCFQTFLDKTMSIEFPEMLAEIITNQIPKYSNGNIK  
 KLLLFHQK

>ANDR\_PANTR

MEVQLGLGRVYPRPPSKTYRGAFQNLFQSVREVIQNPGRHPEAASAAPPASLQQQQQQQQQQQQQ  
 QQQQQQQQETSPPRQQQQGEDGSPQAHRRGPTGYLVLDEEQQPSQPQSAPECHPERGCVPEPGAAVAASK  
 GLPQQLPAPPDEDDSAAPSTLSLLGPTFPGLSSCSADLKDILSEASTMQLLQQQQQEAVSEGSSSGRARE  
 ASGAPTSSKDNYLGGTSTISDSAKELCKAVSVSMGLGVEALEHLSPEQLRGDCMYAPLVGPPAVRPTP  
 CAPLAECKGSLDDSAKSTEDTAEYSPFKGGYTKGLEGESLGCSGSAAGSSGTLELPSTLSLYKSGAL  
 DEAAAYQSRDYNNFPLALAGPPPPPPPHPHARIKLENPLDYGSAAAAAQCRYGLASLHGAGAAGPG  
 SGSPSAAASSWHTLFTAEEGQLYGPCGGGGGGGGGGGGGGGGEAGAVAPYGYTRPPQGLAGQEGDFTA  
 PDVWYPGGMVSRVYPSPTCVKSEMGPWMDSYSGPYGDMRLETARDHVLPIIDYFPPQKTCICGDEASG  
 CHYGALTCGSCVKVFFKRAAEGKQKYL CASRNDCTIDKFRRKNCPCACRYRKCLQAGMNLEA  
 LQEEGEASSTTSPTTEETQKLTVSHIEGYEQPIFLNVLEAIEPGVVCAGHDNNQPDFAALLSSLNELG  
 ERQLVHVVKWAKALPGFRNLHVDDQMAVIQYSWMLMVFAMGWRSTFNVNSRMLYFAPDLVFNERYMHKS  
 RMYSQCVRMRHLSQEFGLWQITPQEFLECMKALLLFSIIPVDGLKNQKFFDELRMNYIKELDRIIACKRKN  
 PTSCSRRFYQLTKLLDSVQPIARELHQFTFDLLIKSHMVSVDFFPEMMAEIIISVQVPKILSGKVKPIYFHT  
 Q

>ANDR\_PAPHA

MEVQLGLGRVYPRPPSKTYRGAFQNLFQSVREVIQNPGRHPEAASAAPPASLQQQQQQQQQETSPPRQQ  
 QQQQGEDGSPQAHRRGPTGYLVLDEEQQPSQPQSAPECHPERGCVPEPGAAVAAGKGLPQQLPAPPDEDD  
 SAAPSTLSLLGPTFPGLSSCSADLKDILSEASTMQLLQQQQQEAVSEGSSSGRAREASGAPTSSKDNYLG  
 GTSTISDSAKELCKAVSVSMGLGVEALEHLSPEQLRGDCMYAPLVGPPAVRPTPCAPLAECKGSLDD  
 SAGKSTEDTAEYSPFKGGYTKGLEGESLGCSGSAAGSSGTLELPSTLSLYKSGALDEAAAYQSRDYNNF

PLALAGPPPPPPPHPHARIKLENPLDYGSAAAAAQCRYGELASLHGAGAAGPGSGSPSAAAASSSWHT  
 LFTAEEGQLYGPCGGGGGGGGGGGAGEAGAVAPYGYTRPPQGLAGQEGDFTAPDVWYPGGMVSRVPYP  
 SPTCVKSEMGPWMDSYSGPYGDMRLETARDHVLPIDYFPPQKTCLICGDEASGCHYGALTCGSCCKVFFK  
 RAAEGKQKYL CASRNDCTIDKFRRKNCPSCLRKCYEAGMTLGARKLKKLGNLKLQEEGEASSTTSPTTE  
 TAQKLTVSHIEGYEQPIFLNVLEAIEPGVVCAGHDNNQPD SFAALLSSLNELGERQLVHVVKWAKALPG  
 FRNLHVDDQMAVIQYSWMGLMVFAMGWSRFTNVNSRMLYFAPDLVFNEYRMHKSRMYSQCVRMRHLSQEF  
 GWLQITPQEF LCMKALLLFSIIPVDGLKNQKFFDEL RMNYIKELDRIIACKRKNPTSCSRRFYQLTKLLD  
 SVQPIARELHQFTFDLLIKSHMVSVD FPEMMAEIIISVQVPKILSGKVKPIYFHTQ

>ANDR\_MACFA

MEVQLGLGRVYPRPPSKTYRGAFQNL FQSVREVIQNPGPRHPEAASAAPP GASLQQQQQQQETS PRQQQ  
 QQQQGEDGSPQAHRRGPTGYLV LDEEQPSQPQSAPECHPERGCVPEPGA AAVAAGKGLPQQLPAPPDEDD  
 SAAPSTLSLLGPTFPGLSSCSTDLKDILSEASTMQLLQQQQQEAVSE GSSSGRAREASGAPTSSKDNLYG  
 GTSTISDSAKELCKAVSVSMGLGVEALEHLS PGEQLRGDCMYAPVLGVPPAVRPTPCAPLAECKGSLDD  
 SAGKSTEDTAEYSPFKGGYTKGLEGESLGC SGAAGSSGTLELPSTLSLYKSGALDEAAAYQSRDYNYF  
 PLALAGPPPPPPPHPHARIKLENPLDYGSAAAAAQCRYGDLASLHGAGAAGPGSGSPSAAAASSSWHT  
 LFTAEEGQLYGPCGGGGGGGGGGGAGEAGAVAPYGYTRPPQGLAGQEGDFTAPDVWYPGGMVSRVPYP  
 SPTCVKSEMGPWMDSYSGPYGDMRLETARDHVLPIDYFPPQKTCLICGDEASGCHYGALTCGSCCKVFFK  
 RAAEGKQKYL CASRNDCTIDKFRRKNCPSCLRKCYEAGMTLGARKLKKLGNLKLQEEGEASSTTSPTTE  
 TAQKLTVSHIEGYEQPIFLNVLEAIEPGVVCAGHDNNQPD SFAALLSSLNELGERQLVHVVKWAKALPG  
 FRNLHVDDQMAVIQYSWMGLMVFAMGWSRFTNVNSRMLYFAPDLVFNEYRMHKSRMYSQCVRMRHLSQEF  
 GWLQITPQEF LCMKALLLFSIIPVDGLKNQKFFDEL RMNYIKELDRIIACKRKNPTSCSRRFYQLTKLLD  
 SVQPIARELHQFTFDLLIKSHMVSVD FPEMMAEIIISVQVPKILSGKVKPIYFHTQ

>ANDR\_MACMU

MEVQLGLGRVYPRPPSKTYRGAFQNL FQSVREVIQNPGPRHPEAASAAPP GASLQQQQQQQETS PRQQQ  
 QQQQGEDGSPQAHRRGPTGYLV LDEEQPSQPQSAPECHPERGCVPEPGA AAVAAGKGLPQQLPAPPDEDD  
 SAAPSTLSLLGPTFPGLSSCSADLKDILSEASTMQLLQQQQQEAVSE GSSSGRAREASGAPTSSKDNYLE  
 GTSTISDSAKELCKAVSVSMGLGVEALEHLS PGEQLRGDCMYAPVLGVPPAVRPTPCAPLAECKGSLDD  
 SAGKSTEDTAEYSPFKGGYTKGLEGESLGC SGAAGSSGTLELPSTLSLYKSGALDEAAAYQSRDYNYF  
 PLALAGPPPPPPPHPHARIKLENPLDYGSAAAAAQCRYGDLASLHGAGAAGPGSGSPSAAAASSSWHT  
 LFTAEEGQLYGPCGGGGGGGGGGGAGEAGAVAPYGYTRPPQGLAGQEGDFTAPDVWYPGGMVSRVPYP  
 SPTCVKSEMGPWMDSYSGPYGDMRLETARDHVLPIDYFPPQKTCLICGDEASGCHYGALTCGSCCKVFFK  
 RAAEGKQKYL CASRNDCTIDKFRRKNCPSCLRKCYEAGMTLGARKLKKLGNLKLQEEGEASSTTSPTTE  
 TAQKLTVSHIEGYEQPIFLNVLEAIEPGVVCAGHDNNQPD SFAALLSSLNELGERQLVHVVKWAKALPG  
 FRNLHVDDQMAVIQYSWMGLMVFAMGWSRFTNVNSRMLYFAPDLVFNEYRMHKSRMYSQCVRMRHLSQEF  
 GWLQITPQEF LCMKALLLFSIIPVDGLKNQKFFDEL RMNYIKELDRIIACKRKNPTSCSRRFYQLTKLLD  
 SVQPIARELHQFTFDLLIKSHMVSVD FPEMMAEIIISVQVPKILSGKVKPIYFHTQ

>Q9UN21\_HUMAN

MEVQLGLGRVYPRPPSKTYRGAFQNL FQSVREVIQNPGPRHPEAASAAPP GASLLLLLQQQQQQQQQQQ  
 QQQETS PRQQQQQQQGEDGSPQAHRRGPTGYLV LDEEQPSQPQSALECHPERGCVPEPGA AAVAASKGLPQ  
 QLPAPPDEDDSAAPSTLSLLGPTFPGLSSCSADLKDILSEASTMQLLQQQQQEAVSE GSSSGRAREASGA  
 PTSSKDNLYGGTSTISDNAKELCKAVSVSMGLGVEALEHLS PGEQLRGDCMYAPLLGVPPAVRPTPCAPL



AECKGSLDDDSAGKSTEDTAEYSPFKGGYTKGLEGESLGCSSGSAAGSSGTLELPSTLSLYKSGALDEAA  
 AYQSRDYNNFPLALAGPPPPPPPHPHARIKLENPLDYGSAAAAAQCARYGDLASLHGAGAAGPGSGSP  
 SAAASSSWHTLFTAEEGQLYGPCGGGGGGGGGGGGGGGAGAVAPYGYTRPPQGLAGQESDFTAPDVWY  
 PGGMVSVPYPSPTCVKSEMGPWMDSSYSGPYGDMRLETARDHVLPIIDYFPPQKTCLICGDEASGCHYGA  
 LTCGCKVFFKRAAEGKQKYLKASRNDCTIDKFRKNCPCRLRKCYEAGMTLGARKLKKLGNLKLQEEG  
 EASSTTSPEETTQKLTVSHIEGYEQPIFLNVLEAIEPGVVCAGHDNNQPDSFAALLSSLNELGERQLV  
 HVVKWAKALPGLRNHVDQMAVIQYSWMGLMVFAMGWSFTNVNSRMLYFAPDLVFNERYMHKSRMSQ  
 CVRMRHLSQEFGLWQITPQEFKMKAMLLFSIIPVDGLKNQKFFDELRMNYIKELDRIIACKRKNPTSCS  
 RRFYQLTKLLDSVHPIARELHQFTFDLLIKSHMVSVDPEMMAEIIISVQVPKILSGKVKPIYFHTQ

>Q5S4M0\_PIG

MDPKESLTPPSREEIPSSVLGRERAHVMDFYKSLRGGTPVKVSAASPSLAAVSQPDSKQQRLAVDFPKGS  
 GSNAQQPDLKAVSLSMGLYMETETETKVMGSDLGFPQQGQISLSSGETDFRLLLEESIANLSRSTSVPENP  
 KSSASAAGPAAPAEKAFPKTHSDGAPEQPNVKGQGTGTNGGNVKLFTTDQSTFDIWRKKLQDLELPSGSPG  
 KETSESPWSSDLLIDENCLLSPLAGEEDPFLLEGSSTEDCKPLVLPDTPKPKVDNGELIILPSPNSVPLPQ  
 VKTEKEDFIELCTPGVIKQEKLGPAYCQASFGANIIGGKMSAISVHGVSTSGGQLYHYDMNTAASLSKQ  
 QEQKPLFNVIPIIPVGENWNRCQGSDDNLTSLGTLNFSGRSVFSNGYSSPGMRPDVSSPPSSSSAATG  
 PPPKLCLVCSDEASGCHYGVLTCGCKVFFKRAVEGQHNYLCAGRNDCIIDKIRKNCPCACRYRKLQAG  
 MNLEARKTKKKIKGIQQATTGVSQETSSENSANKTIVPATLPQLTPTLVSLLEVIEPEVLYAGYDSSIPDS  
 TWRIMTALNMLGGRQVIAAVKWAKAIPGFRNLHDDQMTLLQYSWMFLMVFALGWSYRQSSASLLCFAP  
 DLVINEQRMALPCMYDQCRHMLYVSELQRLQVSYEEYLCMKTLLLLSSVPKDGKLSQELFDEIRMTYIK  
 ELGKAIVKREGNSSQNWRFYQLTKLLDSMHDVVENLLNYCFQTFDKTMSIEFPEMLAEIITNQLPKYS  
 SGNIKKLLFHQK

>GCR\_MOUSE

MDSKESLAPPGRDEVPSLLGRGRGSVMDLYKTLRGGATVKVSAASSPSVAAAASQADSKQQRILLDFSKGS  
 ASNAQQQQQQQQPQDLKAVSLSMGLYMETETETKVMGNDLGYPQQGQLGLSSGETDFRLLLEESIANLNR  
 STSRPENPKSSTPAAGCATPTEKEFPQTHSDPSSEQQNRKSQFGTNGGSVKLYTTDQSTFDILQDLEFSA  
 GSPGKETNESPWRSDDLIDENLLSPLAGEDDPFLLEGVDNEDCKPLIILPDTKPKIQDTGDTILSSPSSVA  
 LPQVKTEKDDFIELCTPGVIKQEKLGVPYCYASFGTNIIGNKMSAISVHGVSTSGGQMYHYDMNTASLS  
 QQDQKPVFNVIPIIPVGENWNRCQGSGEDNLTSLGAMNFAGRSVFSNGYSSPGMRPDVSSPPSSSSSTA  
 TGPPPKLCLVCSDEASVCHYGVLTCGCKVFFKRAVEGQHNYLCAGRNDCIIDKIRKNCPCACRYRKLQ  
 AGMNLEARKTKKKIKGIQQATAGVSQDTSENANKTIVPAALPQLTPTLVSLLEVIEPEVLYAGYDSSVPD  
 SAWRIMTTLNMLGGRQVIAAVKWAKAIPGFRNLHDDQMTLLQYSWMFLMAFALGWSYRQASGNLLCFA  
 PDLIINEQRMALPCMYDQCKHMLFISTELQRLQVSYEEYLCMKTLLLLSSVPKEGLKSQELFDEIRMTYI  
 KELGKAIVKREGNSSQNWRFYQLTKLLDSMHDVVENLLSYCFQTFDKSMSIEFPEMLAEIITNQIPKY  
 SNGNIKLLFHQK

>ANDR\_EULFC

MEVQLGLGRVYPRPPSKTYRGAFQNLQSVREVIQNPGRHPEAASAAPPGARLQQQQTSPQQQQQQQ  
 GEDGSPQAQSRGPTGYLALDEEQPSQQQSALECHPESGCVPEPGAAAAASKGLQQQPAPSDDEDDSAVP  
 STLSLLGPTFPGLSSCSADLKDILSEAGTMQLLQQQQQEAVSEGSSSGRAREAAAGAPTSSKDSYLGST  
 ISDSAKELCKAVSVSMGLGVETLEHLSPGEQLRGDCMYAPLLGGPPAVRPTPCAPLAECKGSLDDSDAK  
 GTEEPAEYTPFKGSYQGLEGESLGCSSSEAGSSGTLELPSTLSLYKSGALEEAASYQSRDYNNFPLAL

AGPPPPPLPPHAPHARIKLENPLDYGSSWAAAAAQCRFGDLASLHGGGATGPGSGSPSAAAASSWHTLFTA  
 EEGQLYGPCCGGGGGTSEAGAVTPYGYSRPPQGLAGQEGDFPAPDVWYPSGVVSRVPYPSPCVKSEMGP  
 WMESYSGPYGDVRLTARDHVLPIIDYFPPQKTCLICGDEASGCHYGALTCGCKVFFKRAEGKQKYL  
 ASRNDCTIDKFRKNCPCRLRKCYEAGMTLGARKLKKLGNLKLQEEGEASSATSPTTESSQKLTVSHIE  
 GYECQPIFLNVLEAIEPGVVCAGHDNNQPDFAALLSSLNELGERQLVHVVKWAKALPGFRNLHVDDQMA  
 VIQYSWMLMVFAMGWSFTNVNSRMLYFAPDLVFNEYRMHKSRYMYSQCVRMRHLSQEFGLQITPQEF  
 CMKALLLFSIIPVDGLKNQKFFDELRMNYIKELDRIIACKRKNPTSCSRRFYQLTKLLDSVQPIARELHQ  
 FTFDLLIKSHMVSVDPEMMAEIIISVQVPKILSGKVKPIYFHTQ

>GCR\_TUPGB

MDSKESLTPSEEIPSSVHGQERGNVDMFYKTRRGATVKVFMPSPLGGSSQSDSKQQRLLVDFPKGSV  
 SNVQQPDLKAVSLSMGLYMGETETKVMGNDLGFQQGQITLSSGETNLQLEESIANLNRSTSVPEHPK  
 ISASVAVSAALLKKELPETPSDVSSEQQNLKGQTGTNGGNVKLCTADQSTFDILQDLEFSSASPGRETNE  
 SPWRSLLLLDENCLLSPLAVEDDPFLSEGKEDCKPLIIPDTKPKIKDNGDLILSSPKNVPLPQVKTEK  
 EDFIELCTPGVIKQEKLGVPVYCQANFSGANIIGNKMSAISVHGVSTSGGQMYHYDMNTATLSQQQDQKPI  
 FNVIPPIPVSSENWNRQCGSDENLTSGLTLNFSGRSVFNGYSSPGMRPDVSSPPSNSLSAVGPPPKFC  
 LVCSDEASGCHYGVLTCGCKVFFKRAVEGQHNYLCAGRNDICIIDKIRKNCPCRYRKLQAGMNLAR  
 KTKKKIKGIQQTGTGISTQETPENSANKTIVPATLPQLTPTVSLLEVIEPEVLYAGYDSSLPDTTWRIMS  
 ALNMLGGRQVIAAVKAKAIPGFRNLHLLDDQMTLLQYSWMLMAFALGWSYKQASANLLCFAPDLIINE  
 QRMSLPFMYDQCKHMLFVSSSELQRLQVSYEEYLCMKTLLLLSSVPKEGLKSQELFDEIRMTYIKELGKAI  
 VKREGNSSQNWQRFYQLTKLLDSMHDVVENLLNYCFQTFLDKTMRIEFPEMLAEIITNQIPKYSSGNIKK  
 LLFHQK

>ANDR\_PIG

MEVQLGLGRVYPRPPSKTFRGAFQNLQSVREVIQNPGRHPPEAASAAPPGARLQQQQLOQQQETSRRRQ  
 QQQQPSEDGSPQVQSRGPTGYLALDEKQPSQQQSAPECHPESGCTPEPGAASAASKGLQQQPPAPPDE  
 DDSAAPSTLSLLGPTFPGLSSCSTDLKDILSEAGTMQLLQQQQQQQQQEAUVSEGNSSGRAREATGAPIS  
 SKDSYLGSSSTISDSAKELCKAVSVMGLGVEALEHLSPEQLRGDCMYAPLLTGPPSVRPTPCAPLAEC  
 KGSLLDDGPGKSNEETAEYSPFKAGYTKGLDSESLGCSSGGEAGGSGTLELPSALSLYKSGALDDVAAYP  
 SRDYNNFPLALAGPPPPPPPHPHARIKLENPLDYGSAWAAAAAQCRYGDLASLHGGGAPGPGSGSPSAT  
 SSSSWHTLFTAESQLYGPGCCGGGGGSAGEAGAVAPYGYTRPPQGLAGQEGDLAIPDIWYPGGVVSRVPY  
 PSPSCVKSEMGPWMESYSGPYGDMRLEPTRDHVLPIDYFPPQKTCLICGDEASGCHYGALTCGCKVFF  
 KRAEGKQKYLASRNDCTIDKFRKNCPCRLRKCYEAGMTLGARKLKKLGNLKLQEEGEASSATSPT  
 EPAQKLTVSHIEGYECQPIFLNVLEAIEPGVVCAGHDNNQPDFAALLSSLNELGERQLVHVVKWAKALP  
 GFRNLHVDDQMAVIQYSWMLMVFAMGWSFTNVNSRMLYFAPDLVFNEYRMHKSRYMYSQCVRMRHLSQ  
 FGWLQITPQEFLLCMKALLLFSIIPVDGLKNQKFFDELRMNYIKELDRIIVMQEKNPTSCSRRFYQLTKLL  
 DSVQPIARELHQFTFDLLIKSHMVSVDPEMMAEIIISVQVPKILSGKVKPIYFHTQ

>GCR\_CAVPO

MDLKESVTSSKEVPSSVLGSERRNVIDFYKTVRGATVKVSASSPSLAAAQSDSKQRLLVDFPKGSGS  
 NAQQPDLKAVSLSMGLYMGETETKVMGNDLGFQQGQISLPSGETDFRLLLEESIANLSRSTSVPENPKN  
 SASAVSGTPTTEFPKTQSDLSSEQENLKSQAGTNGGNVKKFPDQSTFDILKDLEFSSGSPGKERSESPWR  
 PDLLMDESCLLSPLAGEDDPFLLEGNSNEDCKPLIIPDTKPKIKDNGDILSSNSVPPQVKIGKEDFI  
 ELCTPGVIKQEKLGVPVYCQASFSGANIIGNKMSAISVHGVSTSGGQMYHYDMNTASLSQQQDQKPIFNVI

PPIPVGSEWNRCQGSGEDNLTSLGTVNFPGRSVFSNGYSSPGLRPDVSSPPSSSSTTTGPPPKLCLVCS  
 DELSGCHYGVLTCGSKVFFKRAVEGQHNYLCAGRNDICIIDKIRRENCACRYRKCLQAGMNLQARKTKK  
 KIKGIQQATTGVSQNTSENPNKTIVPATLPQLTPTLVSLEVEIEPEVIHSGYDSTSPDSTWRIMTTLNML  
 GGRQVIAAVKWAKAIPGFKNLHLDQMTLLQYSWMFLMAFALGWRYSYKQSNGLLFCFAPDLIINEQRMSL  
 PWMYDQCRYMLYVSSSELKRLQVSYEEYLCMKTLTLLSSVPKEGLKSQELFDEIRMTYIKELGKAIVKREG  
 NSSQNWRQFYQLTKLLDSLHEIVGNLLNICFKTFLDKTMNIEFPEMLAEIITNQLPKYSNGDIKKLLFHQ  
 K

>PRGR\_HUMAN

MTELKAKGPRAPHVAGGPPSPEVGSPLLCPAAGPFPGSQTSDTLPEVSAIPIISLDGLLFPRPCQGQDPS  
 DEKTQDQQSLSDVEGAYSRAEATRAGAGSSSSSPEKDSGLLDSVLDLTLAPSGPGQSQSPSPACEVTSSW  
 CLFGPELPEPDPAAAPATQRVLSPLMSRSGCKVGDSSGTAAAHKVLPRGLSPARQLLLPASESPHWGAPV  
 KPSPQAAAVEVEEEDGSESEESAGPLKKGKPRALGGAAAGGAAAVPPGAAAGGVALVPKEDSRFSAPRV  
 ALVEQDAPMAPGRSPLATTVMDFIHVPIPLPLNHALLAARTRQLEDESYDGGAGAASAFAPPRSSPCASS  
 TPVAVGDFPDCAYPDAEPKDDAYPLYSDFQPPALKIKEEEEEGAEASARSPRSYLVAGANPAAFPDFPLG  
 PPPPLPRATPSRPGAAVTAAPASASVSSASSSGSTLECI LYKAEGAPPQQGPFAPPCKAPGASGCLL  
 PRDGLPSTSASAAAAGAAPALYPALGLNGLPQLGYQAAVLKEGLPQVYPPYLNLYLRPDSEASQSPQYSFE  
 SLPQKICLICGDEASGCHYGVLTCGSKVFFKRAVEGQHNYLCAGRNDICIVDKIRRNCPACRLRKCCQA  
 GMVLGGRKFKKFNKVRVVRALDAVALPQPLGVPNESQALSQRFTFSPGQDIQLIPPLINLLMSIEPDVIY  
 AGHDNTKPDTSLSLLTSLNQLGERQLLSVVKWSKSLPGFRNLHIDDQITLIQYSWMSLMVFGLGWRYSYKH  
 VSGQMLYFAPDLIINEQRMKESFYSLCLTMWQIPQEFVKLQVQEEFLCMKVLNLLNTIPIEGLRSQTQ  
 FEEMRSSYIRELIKAIGLRQKGVVSSSRFYQLTKLLDNLHDLVKQLHLYCLNTFIQSRALSVEFPMMMS  
 EVIAAQLPKILAGMVKPLLFHKK

>ANDR\_CANFA

MEVQLGLGRVYPRPPSKTYRGAFQNLQSVREVIQNPGRHPEAVSAAPPGAHLQQQQQQQQQETSPRQ  
 QQQQQQDGDGSPQAQSRGPTGYLALDEEQQPSQORSASKGHPESACVPEPGVTSATGKGLQQQPAPPDE  
 NDSAAPSTLSLLGPTFPGLSSCSTDLKDILSEAGTMQLLQQRQRRQQQQQQQQQQQQQQQQQQEVVSEGSS  
 SGRAREAAGASTSSKDSYLGGSSSTISDSAKELCKAVSVSMGLGVEALEHLSPEQLRGDCMYAPLLGGPP  
 AVRPCAPLAECKGSLDDGPGKTEETAEYSPFKAGYAKGLDGDSDLGSSSSEAGSGTLEMPSTLSLYK  
 SGALDEAAAYQSRDYNYNPLSLGGPPPHPPPHPHTRIKLENPLDYGSAAAAAAQCRYGDLASLHGAGA  
 AGPSSGSPSATTSSSWHTLFTAEEGQLYGPCGGSGGGSAGDGGSVAPYGYTRPPQGLAQEGDFPPPDVW  
 YPGGVVSRVFPSPSCVKSEMGSWMESYSGPYGDMRLETARDHVLPIDYYPFPQKTCLICGDEASGCHYG  
 ALTCGSKVFFKRAAEGKQKYL CASRNDCTIDKFRRNKPCSCRLRKCYEAGMTLGARKLKKLGNLKLQEE  
 GEASNVTSPTEEPTQKLTVSHIEGYEQPIFLNVLEAIEPGVVCAGHDNNQPDFAALLSSLNELGERQL  
 VHVVKWAKALPGFRNLHVDDQMAVIQYSWMLMVFAMGWRSTNVNSRMLYFAPDLVFNEYRMHKSRMYS  
 QCVRMRHLSQEFQWLQITPQEFELCMKALLLFSIIIPVDGLKNQKFFDELRMNYIKELDRIIACKRKNPTSC  
 SRRFYQLTKLLDSVQPIARELHQFTFDLLIKSHMVSVDFFPEMMAEIIISVQVPKILSGKVKPIYFHTQ

>ANDR\_CROCR

MEVQLGLGRVYPRPPSKTYRGAFQNLQSVREVIQNPGRHPEATSAAPPGARLQQQHQQHQQHETSP  
 RRQQQQQPEDGSPQRPSRGPTSYLALDEEQQPSQHSAKGHPESGCVPEPVAMSRTGKGLEQQQPAPPDE  
 DDSAAPSTLSLLGPTFPGLSSCSTDLKDILSEAGTMQLLQRRQRQRRQQQQQQQQQQQQQQQQQQEVV  
 SEGSSGRAREAAGAPTSSKDSYLGGSSSTISDSAKELCKAVSVSMGLGVEALEHLSPEQLRGDCMYAPL

LGGPPVPCAPLTECKGSVLDDGPSKGTEETAEYSPFKTGYAKGLDGDSDLGCSGSSQAGSGTLEIPST  
 LSLYKSGTLDEAAAYQSRDYNNFQLSLAGPPPPPPSPHPHARIKLENPLDYGSAAAAAQCRYGDLASL  
 HGGGAAGPGSGSPSATASSSWHTLFTAEEGQLYGPCGGSGGGGTGESVSVTPYGYTRPQQGLTGQEGDFP  
 PPDVWYPGGVSRMPYPSASCVKSEMGPWMEYSGPYGDMRLETTRDHVLPIDYFPPQKTCLICGDEAS  
 GCHYGALTCGCKVFFKRAAEGKQKYL CASRNDCTIDKFRKNCPPCRLRKCYEAGMTLGARLKLKLN  
 KLQEEGEASSTTSPTTEETQKLTVSHIEGYECQPIFLNVLEAIEPGVVCAGHDNNQPDSFAALLSSLNEL  
 GERQLVHVVKWAKALPGFRNLHVDDQMAVIQYSWMGLMVFAMGWSFTNVNSRMLYFAPDLVFNEYRMHK  
 SRMYSQCVRMRHLSQEFGLWQITPQEFCLMKALLFSIIPVDGLKNQKFFDELRMNYIKDLDRIIACKRK  
 NPTSCSRRFYQLTKLLDSVQPIARELHQFTFDLLIKSHMVSVDPEMMAEIIISVQVPKILSGKVKPIYFH  
 TQ

>GCR\_RABIT

MDSKESLSPPGREEVPSVLRPAERGNVMDLYKTLRGGAPVRVPASSPSLAPAAQPSKQQLAVDFPKG  
 SASNAQQPDLGRAVSLSMGLYMGETETKVMGSDLAFFQQGQTSLSSETDFRLLLEESIASLNRSASGADN  
 PRSTAPAAGSAAPTTEGFPKTHSDLASERQNPKGQTGGSAGSAKLHPTDQSTFDILQDLEFGSPSKDRSE  
 SPWRSDLLMDENCLLSPLAGEDDPFLLEGNSSEDCPLILPDTKPKIKDNGDLILSNSNNVPLPQVKTEK  
 EDFIELCTPGVIKQEKLGFPVYQCASFSGANIIGNKISAI SVHGVSTSGGQMYHYDMNAQQEQKPLFNVI  
 PPIPVGSENWNRQCQSGDDNLTSLGTMNFPGRSVFNGYSSPGMRPDVSSPPSNSTTAAGPPPKLCLVCS  
 DEASGCHYGVLTCGCKVFFKRAVKGQHNYLCAGRNDCTIDKIRKNCPCACRYRKCLQAGMNLEARKTKK  
 KIKGIQQTSTGVSQETSENPSNRTVVPAALPQLTPTLVSLLEVIEPEVLYAGYDSSVPDSTWRIMTTLNM  
 LGGRQVIAAVKAKAIPGFRNLHLLDDQMTLLQYSWMFLMAFALGWSYKQSSGNMLCFAPDLVINEQRMT  
 LPYMYDQCKHMLFVSELKRLQVSYEEYLCMKTLTLLSTVPKEGLKSQELFDEIRMTYIKELGKAIVKRE  
 GNSSQNWQRFYQLTKLLDSMHEVVENLLHYCFQTFDLKTMSEIEPEMLAEIITNQIPKYSNGNIKKLLFH  
 QK

>ANDR\_RAT

MEVQLGLGRVYPRPPSKTYRGAFQNLQSVREAIQNPGRHPPEAASIAPPGACLQQRQETSPPRRRRRQOH  
 PEDGSPQAHIRGTTGYLALEEEQQPSQQQSASEGHPESEGCLPEPGAATAPGKGLPQQPPAPPDQDDSAAP  
 STLSLLGPTFPGLSSCSADIKDILSEAGTMQLLQQQQQQQQQQQQQQQQQQQQQEVISEGSSSVRAREA  
 TGAPSSSKDSYLGNGSTISDSAKELCKAVSVSMGLGVEALEHLSPEQLRGDCMYASLLGGPPAVRPTPC  
 APLAECKGLSLDEGPGKTEETAEYSSFKGGYAKGLEGESLGCSGSSEAGSGTLEIPSSLSLYKSGAVD  
 EAAAYQNRDYNNFPLALS GPPHPPPPH PHARIKLENPSDYGSAAAAAQCRYGDLASLHGGSVAGPST  
 GSPPATASSSWHTLFTAEEGQLYGPGGGGSSSPSDAGPVAPYGYTRPPQGLASQEGDFSASEVWYPGGV  
 VNRVPYPSPCVKSEMGPWMENYSGPYGDMRLDSTRDHVLPIDYFPPQKTCLICGDEASGCHYGALTCG  
 SCKVFFKRAAEGKQKYL CASRNDCTIDKFRKNCPCRLRKCYEAGMTLGARKLKLKLNKLQEEGENSS  
 AGSPTEDPSQKMTVSHIEGYECQPIFLNVLEAIEPGVVCAGHDNNQPDSFAALLSSLNELGERQLVHVVK  
 WAKALPGFRNLHVDDQMAVIQYSWMGLMVFAMGWSFTNVNSRMLYFAPDLVFNEYRMHKSRMYSQCVRM  
 RHLSQEFGLWQITPQEFCLMKALLFSIIPVDGLKNQKFFDELRMNYIKELDRIIACKRKNPTSCSRRFY  
 QLTLLDSVQPIARELHQFTFDLLIKSHMVSVDPEMMAEIIISVQVPKILSGKVKPIYFHTQ

>ANDR\_MOUSE

MEVQLGLGRVYPRPPSKTYRGAFQNLQSVREAIQNPGRHPPEAANIAPPGACLQQRQETSPPRRRRRQOH  
 TEDGSPQAHIRGPTGYLALEEEQQPSQQQAASEGHPESSCLPEPGAATAPGKGLPQQPPAPPDQDDSAAP  
 STLSLLGPTFPGLSSCSADIKDILNEAGTMQLLQQQQQQQQHQQQHQQQHQQQEVISEGSSARAREATGA

PSSSKDSYLGGNSTISDSAKELCKAVSVSMGLGVEALEHLSPEQLRGDCMYASLLGGPPAVRPTPCAPL  
 PECKGLPLDEGPGKSTEETAHEYSSFKGGYAKGLEGESLGCSSSEAGSSGTLEIPSSLSLYKSGALDEAA  
 AYQNRDYNFPLALSGPPHPPPTHPHARIKLENPLDYGSAAAAAAQCRYGDLGSLHGGSVAGPSTGSP  
 PATSSSSWHTLFTAEEGQLYGPGGGGSSSPSDAGPVAPYGYTRPPQGLTSQESDYSASEVWYPGGVVNR  
 VPYPSNCVKSEMGPWMENYSGPYGDMRLDSTRDHVLPIDYFPPQKTCLICGDEASGCHYGALTCGSK  
 VFFKRAAEGKQKYLCASTRNDCTIDKFRKNCPCSLRKCYEAGMTLGARKLKKLGNLKLQEEGENSNAGS  
 PTEDPSQKMTVSHIEGYEQPIFLNVLEAIEPGVVCAGHDNNQPDFAALLSSLNELGERQLVHVVKWAK  
 ALPGFRNLHVDDQMAVIQYSWMGLMVFAMGWSFTNVNSRMLYFAPDLVFNEMHKSRYMYQCVRMRHL  
 SQEFGWLQITPQEFCLMKALLLFSIIPVDGLKNQKFFDELRMNYIKELDRIIACKRKNPTSCSRRFYQLT  
 KLLDSVQPIARELHQFTFDLLIKSHMVSVDFFPEMMAEIIISVQVPKILSGKVKPIYFHTQ

>PRGR\_RABIT

MTELKAKEPRAPHVAGGAPSPTEVGSQLLGRPDGPFQGSQTSEASSVVSIAIPISLDGLLFPRPCQGQNP  
 PDGKTQDPPSLSDVEGAFPGVEAPEGAGDSSSRPPEKDSGLLDSVLDTLLAPSGPGQSHASPATCEAISP  
 WCLFGPDLPEDPRAAPATKGVLAFLMSRPEDKAGDSSGTAAAHKVLPRGLSPSRQLLLPSSGSPHWPVAVK  
 PSPQPAAVQVDEEDSSESEGTGVLKQPPRALGGTAAGGGAAPVASGAAAGGVALVPKEDSRFSAPRVS  
 LAEQDAPVAPGRSPLATSVVDFIHVPIPLNHAFLATRTRQLLEGESYDGGAAAASPFVQRGSPSASST  
 PVAGGDFPDCTYPPDAEPKDDAFPLYGDFQPPALKIKEEEEEAAEAARSPTYLVAGANPAAFPDFQLAA  
 PPPPSLPPRVSSSRPGEAAVAASPGSASVSSSSSSGSTLECIKYAEGAPPQQGPFAPLPCKPPGAGACL  
 LPRDGLPSTSASGAAAGAALYPTLGLNGLPQLGYQAAVLKEGLPQVYTPYLNLYLRPDSEASQSPQYSF  
 ESLPQKICLICGDEASGCHYGVLTCGSKVFFKRAMEGQHNYLCAGRNDICVDKIRRNKCPACRLRKCQ  
 AGMVLGGRKFKKFNKVRVMRALDAVALPQVGI PNESQRITFSPSQEIQLIPPLINLLMSIEPDVIYAGH  
 DNTKPDTSLLTSLNQLGERQLLSVVKWSKSLPGFRNLHIDDQITLIQYSWMSLMVFGLGWRSYKHVSG  
 QMLYFAPDLILNEQRMKESFFYSLCLTMWQIQEFVKLQVQEEFLCMKVLNLLNTIPLGLRSQSOFEE  
 MRSSYIRELIKAIGLRQKGVVSSQRFYQLTKLLDNLHDLVKQLHLYCLNTFIQSRALSVEFPMMSEVI  
 AAQLPKILAGMVKPLLFHKK

>MCR\_SAISC

METKGYHSLPEGLDMERRWGQVSQAVEHSSLGSTERTDENNYMEIVNVSCVSGAIPNNSTQGSSKEKHEL  
 LPCLQQDNNRPGILTSDIKTELESKELSATVAESMGLYMDSVRDADYEQQNQQRSMSPAKIYQNVQQLV  
 KFYKENGHRPSTLSCVNRPLRSFMSDSVSSVNGGVMRAIVKSPIMCHEKSPSVCSPLNMTSSVCSPAGIN  
 SVSSTTASFGSFPVHSPITQGTPLTCSPNVENRGRSHSPAHASNVGSPLSSPLSSMKSSISSPPSHCSV  
 KSPVSSPNNVTPRSSVSSPANINNSRCSVSSPSNTNNRSTLSSPAASTVGSICSPVNNAFSYTASGTSAG  
 SSTSRDVVPSDPTQEKGAQEVFPKTEEVESAINSGVTGQLNIVQYIKPEPDGAFSSSCLGNSKINSDS  
 PFSVPIKQESTKHSCSGTSFKGNPTVNPFFMDGSYFSFMDDKDYSSLGILGPPVPGFDGTCEGSGFPV  
 GIKQEPDDGSYYPEASIPSSAIVGVNNGGQSFHYRIGAQGTISLSRSARDQSFQHLSSFPVNTLVESWK  
 SHGDLSSRRSDGYPVLEYIPENVSSSTLRSVSTGSSRPSKICLVCGDEASGCHYGVTTCGSKVFFKRAV  
 EGQHNYLCAGRNDICIDKIRRNKCPACRLQKCLQAGMNLGARRSKKLGLKGIHEEQPQQQPPPPPPPPQ  
 SPEEGTTYIAPAKEPSVNTALVPQLSAISRALTSPAMVLENIEPEVVYAGYDNSKPDTAENLLSTLNRL  
 AGKQMIQVVKWAKVLPGFKNLPLEDQITLIQYSWMCLSSFALSWRSYKHTNSQFLYFAPDLVFNEEKMHQ  
 SAMYELCQGMHQISLQFIRLQLTFFEYTIMKVLNLLSTVPKDGKLSQAAFEEMRTNYIKELRKMVTKCPN  
 NSGQSWQRFYQLTKLLDSMHDLVNDLLEFCFYTFRESQALKVEFPAMLVEIISDQLPKVESGNAKPLYFH  
 RK

>Q6XLI9\_CALJA

METKGYHSLPEGLDMERRWGQVSQAVEHSSLGSTERTDENNYMEIVNVSCVSGAIPNNSTQGSSKEKHEL  
 LPCLQQDNNRPGVLTSDIKTELESKELSATVAESMGLYMDSVRDADYEQQNQQRSMSPAKIYQNVEQLV  
 KFKYKENGHRPSTLSCVNRPLRSFMSDSGSSVNGGVMRAIVRSPIMCHEKSPSVCSPLNMTSSVCSPAGIN  
 SESSTTASFGSFPVHSPITQGTPLTCSNVENRGRSRSHSPAHASNVGSPLSSPLSSMKSSISSPPSHCSV  
 KSPVSSPNNVTLRSSVSSPANINNSRCSVSSPSNTNNRSTLSSPAASTVGSICSPVNNAFSYTASGTSAG  
 SSTSRDVVPSDPTQEKGAQEVFPFKTEEVESAINSGVTGQLNIVQYIKPEPDGAFSSSCLGGNSKINSDS  
 PFSVPIKQESTKHSCSGTSFKGNPTVNPFFMDGSYFSFMDDDKYYSLSGILGPPVPGFDGNCEGSGFPV  
 GIKQEPDDGSYYPEASIPSSAIVGVNSGGQSFHYRIGAQGTISLSRSARDQSFQHLSSFPVNTLVESWK  
 SHGDLSSRRSDGYPVLEYIPENVSSSTLRSVSTGSSRPSKICLVCGDEASGCHYGVVTCGCKVFFKRAV  
 EGQHNYLCAGRNDCIDKIRRKNCPACRLQKCLQAGMNLGARKSKKLGKLGKIHEEQPQQQQPPPPPPP  
 QSPEEGTTYIAPAKEPSVNTALVPQLSTISRALTSPAMVLENIEPEVVYAGYDNSKPDTAENLLSTLNR  
 LAGKQMIQVVKWAKVLPGFKNLPLEDQITLIQYSWMLSSFALSWRSYKHTNSQFLYFAPDLVFNEEKMH  
 QSAMYELCQGMHQISLQFIRLQLTFEYTIMKVLNLLSTVPKDGLKSQAAFEEMRTNYIKELRKMVTKCP  
 NNSGQSWQRFYQLTKLLDSMHDLVNDLLEFCFYTFRESQALKVEFPAMLVEIISDQLPKVESGNAKPLYF  
 HRK

>MCR\_HUMAN

METKGYHSLPEGLDMERRWGQVSQAVERSLGPRTERTDENNYMEIVNVSCVSGAIPNNSTQGSSKEKQEL  
 LPCLQQDNNRPGILTSDIKTELESKELSATVAESMGLYMDSVRDADYSYEQQNQQGSMSPAKIYQNVEQL  
 VKFYKGNHRPSTLSCVNTPLRSFMSDSGSSVNGGVMRAIVKSPIMCHEKSPSVCSPLNMTSSVCSPAGI  
 NSVSSTTASFGSFPVHSPITQGTPLTCSVNAENRGRSRSHSPAHASNVGSPLSSPLSSMKSSISSPPSHCS  
 VKSPVSSPNNVTLRSSVSSPANINNSRCSVSSPSNTNNRSTLSSPAASTVGSICSPVNNAFSYTASGTS  
 GSSTLRDVVPSDPTQEKGAQEVFPFKTEEVESAINSGVTGQLNIVQYIKPEPDGAFSSSCLGGNSKINSD  
 SSFSVPIKQESTKHSCSGTSFKGNPTVNPFFMDGSYFSFMDDDKYYSLSGILGPPVPGFDGNCEGSGFP  
 VGIKQEPDDGSYYPEASIPSSAIVGVNSGGQSFHYRIGAQGTISLSRSARDQSFQHLSSFPVNTLVESW  
 KSHGDLSSRRSDGYPVLEYIPENVSSSTLRSVSTGSSRPSKICLVCGDEASGCHYGVVTCGCKVFFKRA  
 VEGQHNYLCAGRNDCIDKIRRKNCPACRLQKCLQAGMNLGARKSKKLGKLGKIHEEQPQQQQPPPPPPP  
 PQSPEEGTTYIAPAKEPSVNTALVPQLSTISRALTSPVMVLENIEPEIVYAGYDSSKPDTAENLLSTLN  
 RLAGKQMIQVVKWAKVLPGFKNLPLEDQITLIQYSWMLSSFALSWRSYKHTNSQFLYFAPDLVFNEEKMH  
 HQSAMYELCQGMHQISLQFVRLQLTFEYTIMKVLNLLSTIPKDGLKSQAAFEEMRTNYIKELRKMVTKC  
 PNNSGQSWQRFYQLTKLLDSMHDLVSDLLEFCFYTFRESHALKVEFPAMLVEIISDQLPKVESGNAKPLY  
 FHRK

>MCR\_RAT

METKGYHSLPEGLDMERRWSQVSQTLERSLGAERTTENNYMEIVNVSCVSGAIPNNSTQGSSKEKHEL  
 LPYIQDNSRSGILPDIKTELESKELSATVAESMGLYMDSVRDAEYTYDQQNQQGSLSPTKIYQNMEQL  
 VKFYKENGHRSTLSAMRPLRSFMPDSAASMGALRAIVKSPIICHEKSSSVSSPLNMASSVCSVPGI  
 NSMSSSTTSFGSFPVHSPITQGTSLTCSVSVENRGRSRSHSPTHASNVGSPLSSPLSSMKSPISSPPSHCS  
 VKSPVSSPNNVPLRSSVSSPANLNNSRCSVSSPSNNTNNRSTLSSPTASTVGSIGSPIISNAFSYATSGAS  
 AGAGAIQDVVPSDPTHEKGAHDVFPFKTEEVEKAINSGVTGPLNIVQYIKSEPFGAFSSSCLGGNSKISP  
 SSPFSVPIKQESSKHSCSGASFKGNPTVNPFFMDGSYFSFMDDDKYYSLSGILGPPVPGFDGSCEDSAF  
 PVGIKQEPDDGSYYPEASIPSSAIVGVNSGGQSFHYRIGAQGTISLSRSPRDQSFQHLSSFPVNTLVES  
 WKPHGDLSSRRSDGYPVLEYIPENVSSSTLRSVSTGSSRPSKICLVCGDEASGCHYGVVTCGCKVFFKR

AVEGQHNYLCAGRNDCIIDKIRRKNCPACRLQKCLQAGMNLGARKSKKLGKLGKLHHEEQPPPPPPQS  
 PEEGTTYIAPTKEPSVNSALVPQLTSITHALTPSPAMILENIEPETVYAGYDNSKPDTAESLLSTLNRLA  
 AKQMIQVVKWAKVLPGFKNLPLEDQITLIQYSWMCLSSFALSWRSYKHTNSQLLYFAPDLVFNEEKMHQS  
 AMYELCQGMQRQISLQFVRLQLTFEEYSIMKVLLLLSTVPKDGLKSQAAFEEMRTNYIKELRKMVTKCPNS  
 SGQSWQRFYQLTKLLDSMHDLVSDLLEFCFYTFRESQALKVEFPAMLVEIITDQLPKVESGNAKPLYFHR  
 K

>MCR\_MOUSE

METKGYHSLPEGLDMERRWSQVSQTLERSSSLGPAERTNENSYMEIVNVSCVSGATPNNSTQGSSKEKHEL  
 LPCLQQDNSRSGILPSPDIKTELESKELSATVAESMGLYMDSVRDAEYTYDQQNQGSLSPAKIYQNMEQL  
 VKFYKENGHRSSSTLSAISRPLRSFMPDSGTSMNGGALRAIVKSPIICHEKSPSVCSPLNMPSSVCSPIGI  
 NSMSSSTASFGSFPVHSPITQGTSLTCSPSVENRGRSRSHSPVHASNVGSPLSSPLSSMKSPISSPPSHCS  
 VKSPVSSPNNVPLRSSVSSPANLNNSRCSVSSPSNTNNSRSTLSSPTASTVGSIGSPISNAFYSYTTSGASA  
 GAGAIQDMVPSPDTHEKGAHDVFPFKTEEVEKAI SNGVTGQLNIVQYIKPEPDGAFSSSSCLGGNNKINPS  
 SPFSVPIKQESSKHSCSGASFKGNPTVNPFPFMDGSYFSFMDDKDYSLSGILGPPVPGFDSCEGSAFP  
 GGIKQEPDDGSYFPETSIPSSAIGVNSGGQSFHYRIGAQGTISLSRSPRDQSFQHLSSFPVNALVESW  
 KPHGLSSRRSDGYPVLEYIPENVSSSTLRSVSTGSSRPSKICLVCGDEASGCHYGVTGCGSCKVFFKRA  
 VEHNYLCAGRNDCIIDKIRRKNCPACRLQKCLQAGMNLGARKSKKLGKLGKLHHEEQPPPPPPQSPEE  
 GTTYIAPTKEPSVNSALVPQLASITRALTPSPSMILENIEPEIVYAGYDNSKPDTAESLLSTLNRLAGKQ  
 MIQVVKWAKVLPGFKNLPLEDQITLIQYSWMCLSSFALSWRSYKHTNSQFLYFAPDLVFNEEKMHQSAMY  
 ELCQGMQRQISLQFVRLQLTFEEYSIMKVLLLLSTVPKDGLKSQAAFEEMRTNYIKELRKMVTKCPNSSGQ  
 SWQRFYQLTKLLDSMHDLVNDLLEFCFYTFRESQALKVEFPAMLVEIISDQLPKVESGNAKPLYFHRK

>PRGR\_RAT

MTELQAKDPRTLHTSGAAPSPTHVGSPLLARLDPDFQGSQHS DASSVVSPIPIISLDRLLF SRSCQAQEL  
 PDEKTQNQQSLSDVEGAFSGVEASRRRSRNPRAPEKDSRLLDSVLDTLLAPSGPEQSQTSPPACEAITSW  
 CLFGPELPEDPRSVPATKGLLSPLMSRPESKAGDSSGTGAGQKVLPAKAVSPRQLLLPTSGSAHWPGAGV  
 KPSQQPATVEVEEDGGLETEGSAGPLLKSKPRALEGMCSGGVTANAPGAAPGGVTLVPKEDSRFSAPRV  
 SLEQDAPVAPGRSPLATTVVDFIHVPIPLPLNHALLAARTRQILLEGDSYDGGAAAQVPFAPPRGSPSAPSP  
 PVPCGDFPDCTYPPEGDPKEDGFPVYGEFQPPGLKIKEEEEGTEAASRSPRPYLLAGASAATFPDFPLPP  
 RPPRAPPSRPGEAAVAAPSAVSPVSSSGSALECIKYAEGAPPTQGSFAPLPCKPPAASSCLLPRDSL  
 AAPTSSAAPAIYPPLGLNGLPQLGYQAAVLKDSLQVYPPYLNLYLRPDSEASQSPQYGFDSLQKICLIC  
 GDEASGCHYGVLTCGSCVFFKRAMEGQHNYLCAGRNDCIIDKIRRKNCPACRLRKCQAGMVLGGRKFK  
 KFNKVRVMRALDGVLPQSVAFPNESQTLGQRITFSPNQEIQLVPPPLINLLMSIEPDVVYAGHDNTKPD  
 SSSLLTSLNQLGERQLLSVVKWSKSLPGFRNLHIDDQITLIQYSWMSLMVFGLGWSYKHVSGQMLYFAP  
 DLILNEQRMKELSFYSLCLTMWQIPQEFVKLQVTHEEFLCMKVLLLLNTIPLEGLRSQSQFEEMRSSYIR  
 ELIKAIGLRQKGVVPSQRFYQLTKLLDSLHDLVKQLHLHYCLNTFIQSRALAVEFPMMSEVIAAQLPKI  
 LAGMVKPLLHKK

>PRGR\_MOUSE

MTELQAKDPQVLTSGASPSPPHIGSPLLARLDGSPFQGSQHS DVSSVVSPIPIISLDGLLFP RSCRGPEL  
 PDGKTGDQQSLSDVEGAFSGVEATHREGGRNSRPPEKDSRLLDSVLDLSTLTPSGPEQSHASPPACEAITS  
 WCLFGPELPEDPRSVPATKGLLSPLMSRPEIKVGDQSGTGRGQKVLPKGLSPRQLLLPTSGSAHWPGAG  
 VKPSPQPAAGEVEEDSGLLETEGSASPLLKSKPRALEGTGQGGVAANAPSAAPGGVTLVPKEDSRFSAPR

VSLEQDSPIAPGRSPLATTVVDFIHVPILPLNHALLAARTRQLLEGESYDGGATAGPFCPPRSPSAPSTP  
 VPRGDFPDCTYPLEGDPKEDVFPLYGDFQTPGLKIKEEEEEGADA AVRSPRPYLSAGASSSTFPDFPLAPA  
 PQAAPSSRPGEEAVAGGPSSAAVSPASSSGSALECI LYKAEAPPTQGSFAPLPCKPPAAASCLLPRDSLP  
 AAPGTAAAPAIYQPLGLNGLPQLGYQAAVLKDSLQVYPPYLNLYLRPDSEASQSPQYGFDSLQKICLIC  
 GDEASGCHYGVLTCGSCVKVFFKRAMEGQHNYLCAGRND CIVDKIRRKNC PACRLRKCCQAGMVLGGRKFK  
 KFNKVRVMRTLDGVALPQSVGLPNESQALSQRITFS PNQEIQLVPPLINLLMSIEPDVIYAGHDNTKPD  
 SSSLLTSLNQLGERQLLSVVKWSKSLPGFRNLHIDDQITLIQYSWMSLMVFLGWRSYKHSVGMQLYFAP  
 DLILNEQRMKELSFYSLCLTMWQIPQEFVKLQVTHEEFKLVLLLLNTI PLEGLRSQSQFEEMRSSYIR  
 ELIKAIGLRQKGVVPTSQRFYQLTKLLDSLHDLVKQLHLHYCLNTFIQSRTLAVEFPPEMMSEVIAAQLPKI  
 LAGMVKPLLFHKK

>MCR\_TUPGB

METKGYHSRPEGLDMERRWGQVSQPVDRPSLGAERTEENNYMEIVNVSCVSGAIPNNSTQSSSKEKQEL  
 LPCLQQDNTQSGILTSEIKTELEPKELSATVAESMGLYMDSVREADYAFEQHAQQGSLSPAKIYQNVQEL  
 MKFYKENGHRSSTLNVSRSRPSFLPDPGSAVNGGVMRAMVKSPILCHEKSPSVCSPLNMTSSVCSFAGI  
 NSVSSTTVRFGSFPVHSPITQGTPLTCSPTVDNRGSRSHSPAHASNVGSPLSSPLSSMKSPISSPPSHCS  
 VKSPVSSPNNVTLRSCVSSPANINNSRCSVSSPSKANNRSTLSSPAASTVGSICSPNAFSYPASGASVGS  
 SATRDVIPSPDTHEKGAHEVPFPKTEEVENAISNGVTGQLNIVQYIKPEPDGAFSSSSCLGGNSKIHS DSP  
 FSSVPIKQESTKHSCSGASFKNPTVNPFFPMDGSYFSFMDDKDYSSLGILGPPVPGFEGNCEGTGFPM  
 GIKQEPDYGIYYPEASIPSSAIVGVNSGGQSFHYRIGAQTISLSRSARDQSFQHLSSFPVNTLVESWK  
 SHGDL SARKIDGYPVLEYIPENVSSSTLRSVSTGSSRPSKICLVCGDGASGCHYGVTTCGSCVKVFFKRAV  
 EGQHNYLCAGRND CIIDKIRRKNC PACRLQKCLQAGMNLGARKSKKLGKLGKGLHEEQPPPPQSPPEEG  
 TTYIAPAKEPSVNTALVPQLSSISRALT PSPVMLENIEPEIVYAGYDSSKPD TAENLLSTLNLRLAGKQM  
 IQVVKWAKVLPGFKNLPLEDQITLIQYSRMCLSSFALSWRSYKHTNSQFFYFAPDLVFNEEKMHQSAMYE  
 LCQGMHQISLQFVRLQFTFEEYTFMEVLLLLSTIPKDG LKSQA AFEEMRANYIKELRKMVTKCPNNSGQS  
 WQGFYQLTKFLDSMHDLVSDLLEFCFYTFRELQALKVEFPAMLVEIISDQLPKVESGNAKPLYFHRK

>Q13771\_HUMAN

MQLLQQQQQEAVSEGSSSGRAREASGAPTSSKDNYLGGTSTISDNAKELCKAVSVSMGLGVEALEHLS PG  
 EQLRGDCMYAPLLGVPPAVRPTPCAPLAECKGSLDDDSAGKSTEDTAEYSPFKGGYTKGLEGESLGCSSG  
 AAAGSSGTLELPSTLSLYKSGALDEAAAYQSRDYNFPLALAGPPPPPPPHPHARIKLENLLDYGSAWA  
 AAAAQCRYGDLASLHGAGAAGPGSGSPSAAASSWHTLFTAEEGQLYGPCGGGGGGGGGGGGGGGGEAGA  
 VAPYGYTRPPQGLAGQESDFTAPDVWYPGGMVSRVPYPSPTCVKSEMGPWMDSYSGPYGDMRLETARDHV  
 LPIDYFPPQKTCLICGDEASGCHYGALTCGSCVKVFFKRAAEGKQKYL CASRNDCTIDKFRRKNCPSCL  
 RKCYEAGMTLGARKLKLGNLKLQEEGEASSTTSPT EETTQKLT VSHIEGYECQPIFLNVLEAIEPGVVC  
 AGHDNNQPDSFAALLSSLNELGERQLVHVVKWAKALPGLRNLHVDDQMAVIQYSWMGLMVFAMGWSFTN  
 VNSRMLYFAPDLVFNEYRMHKS RMYSQCVRMRHLSQEFGLWQITPQEFKLVKAMLIFFFFLLLSIIIPVD  
 GLKNQKFFDEL RMNYIKELDRIIACKRKNPTSCSRRFYQLTKLLDSVQPIARELHQFTFDLLIKSHMVS  
 DFPDMAEIIISVQVPKILSGKVKPIYFHTQ

>Q6DDL0\_XENLA

MDPKDLLKPSGSPAVRGS PHYNDKPGNVIEFFGN YRGVSVSVSASCPTSTASQSNTRQQQHFQKQLTA  
 TGDSTNGLNNVPQPDLSKAVLSMGLYMGESDTKVMSSDIAFPSQE QIGISTGETDFS LLEESIANLQA  
 KSLAPDKLIEISEDPGGFKCDISAQPRPSMGQGGSSNGSSSTNLF PKDQCTFDLLRDLGISPDSPLDGKSN



PWLDPLFDEQEAFNLLSPLGTGDPFFMKSEVLSEGSKPLSLEDGTQRLGDHAKDMLLPSADLPISQVKTE  
 KEDYIELCTPGVVKQEKFGPVYCVGNFSGSGLFGNKSSAISVHGVSTSGGQMYHYDLNTATISQQDVKPV  
 FNLGSPGTSIAEGWNRCHGSGNDTAASPGNVNFPNRSVFSNGYSSPGIRSDASPSSTSTSTGPPPKLC  
 LVCSDEASGCHYGVLTCGSKVFFKRAVEGQHNYLCAGRNDCIIDKIRRKNCPACRYRKCLQAGMNLEAR  
 KTKKKIKGIQQSTTATARESPETSMTRTLVPASVAQLTPTLISLLEVIEPEVLYSGYDSSIPDTTRRLMS  
 SLNMLGGRQVVS AVRWAKAIPGFRNLHLDDQMTLLQYSWMFLMVFALGWRYSYKQTNGSILYFAPDLVITE  
 DRMHLPFMQERCQEMLKIAGEMSSLQISYDEYLCMKVLLMCTIPKEGLKSHALFEEIRMTYIKELGKAI  
 VKREGNSSQNWQRFYQLTKLLDSMHEVAENLLAFCLFSLFDKSMSEIFPDMLSEIISNQIPKYSSGNLKK  
 LLFHQK

>GCR\_XENLA

MDPKDLLKPSGSPAVRGS PHYNDKPGNVIEFFGNRYGGVSVSVSASCPTSTASQSNTRQQHFQKQLTA  
 TGDSTNGLNNVNPQDLSKAVLSMGLYMGESDTKVMSSDIAFPSQEIQIGISTGETDFSLEESIANLQA  
 KSLAPDKLIEISEDPGGFKCDISAQPRPSMGQGGSSSTNLFPKDQCTFDLLRDLGISPDSPLDGKSN  
 PWLDPLFDEQEAFNLLSPLGTGDPFFMKSEVLSEGSKPLSLEDGTQRLGDHAKDMLLPSADRPISQVKTE  
 KEDYIELCTPGVNEEKFGPVYCVGNFSGSGLFGNKSSAISVHGVSTSGGQMYHYDLNTATISQQDVKPV  
 FNLGSPGTSIAEGWNRCHGSGNDTAASPGNVNFPNRSVFSNGYSSPGIRSDASPSSTSTSTGPPPKLC  
 LVCSDEASGCHYGVLTCGSKVFFKRAVEGQHNYLCAGRNDCIIDKIRRKNCPACRYRKCLQAGMNLEAR  
 KTKKKIKGIQQSTTATARESPETSMTRTLVPASVAQLTPTLISLLEVIEPEVLYSGYDSSIPDTTRRLMS  
 SLNMLGGRQVVS AVRWAKAIPGFRNLHLDDQMTLLQYSWMFLMVFALGWRYSYKQTNGSILYFAPDLVITE  
 DRMHLPFMQERCQEMLKIAGEMSSLQISYDEYLCMKVLLMCTIPKEGLKSHALFEEIRMTYIKELGKAI  
 VKREGNSSQNWQRFYQLTKLLDSMHEVAENLLAFCLFSLFDKSMSEIFPDMLSEIISNQIPKYSSGNLKK  
 LLFHQK

>Q66J29\_XENLA

METKGYKNFQEGVNMERQWGQVPRDFSSPNSRQQTPENTYMEIVNVNCDSDSFPQNNAKADSKEKQDLLP  
 CLQQDSSKPSLLTQELKPELESKELSAAVAESMGLYMDSVRDSDYPYDQQNQQTNGSGTIFQSMNPFYK  
 QTTQGTFPADCQTRSLRSAIESDKSMNGKLSNTVKSPLSYSEKNLSVGSPSVMALPVCSPTGISSTSCS  
 TTFGNFTVHSPVNQVTPKSCSPHTDNRCIAHSPAGTVESPLSSPVSSMRSPISSPPSHASLKSVPSSPN  
 NITVRPSVSSPGNINTRSSLSSPSNANNRSTISSPAASSMGSSICSPASSTLGFLPGVMPDGGTASDGI  
 ISAETKDKGAQQIMFPKVEEMNEIADSTVSLVKFIKPDPAIFSSTCFGDTVSSDPAFSIPIKQESCKN  
 TCSSALFKGSQSANPFPMDSYFAFMDDKDYISLGLGPPVSSFGDGFEGNGFSNQLNVAIKQETED  
 SSFYPENMPPSSAIVGVNSCGQSFHYRIGAQGTISLSRPLNRDQSFQNLSSFPMSLVEVSWKTQSELAQ  
 NTLSSRRNDGFPVPGYIPENMSSTTLRSMSTGPRSRSKVCLVCGDEASGCHYGVTTCGSKVFFKRAVEG  
 QHSYLCAGRNDCIIDKIRRKNCPACRLQKCLQAGMNLGARKSKKLGKLGKVHEEHPQQPLQQTPTASPKE  
 DTTLTSSSKEPSANSNSLVPLISAVSPAITLSAAVILENIEPEIVYAGYDNTQPDTAENLLSSLNQLAGK  
 QMVQVVKWAKVIPGFRNLPLEDQITLIQYSWMCLSSFALSWRSYKHASSQFLYFAPDLIFNEERMRSAM  
 YDLCQGMQQISLEFSRLQLTFEEYTLMKVLLLLSTVPKDGLKCQAAFEEMRVNYIKELRQVLLKSPHNSG  
 QSWQRYFQLTKLLDSMQDLVGDLEFCFYTFRESQALKVEFPAMLVEIISDQLPKVESGIAKPLYFHRK

>Q8NG42\_HUMAN

MTELKAKGPRAPHVAGGPPSPEVGSPLLCPAAGPFPGSQTSDTLPEVSAIPIISLDGLLFPRPCQGQDPS  
 DEKTQDQQSLSDVEGAYSRAEATRAGAGSSSSPPEKDSGLLDSVLDTLLAPSGPGQSQSPSPACEVTSSW  
 CLFGPELPEDPPAAPATQRVLSPLMSRSGCKVGDSSGTAAAHKVLPRLGSPARQLLLPASESPHWGAPV

KPSPQAAAVEVEEEDGSESEESAGPLLKGPALGGAAAGGAAAVPPGAAAGGVALVPKEDSRFSAPRV  
 ALVEQDAPMAPGRSPLATTVMDFIHVPILPLNHALLAARTRQLEDESYDGGAGAASAFAPPRSSPCASS  
 TPVAVGDFPDCAYPDAEPKDDAYPLYSDFPQALKIKEEEEGAEASARSPRSYLVAGANPAAFPDPFLG  
 PPPPLPPRATPSRPGEEAAVTAAPASASVSSASSSGSTLECI LYKAEGAPPQQGPFAPPCKAPGASGCLL  
 PRDGLPSTSASAAAAGAAPALYPALGLNGLPQLGYQAAVLKEGLPQVYPPYLNLYLRPDSEASQSPQYSFE  
 SLPQKICLICGDEASGCHYGVLTCGSCKVFFKRAMEGQHNYLCAGRND CIVDKIRRNCPACRLRKCCQA  
 GMVLGGRKFKFNKVRVVRALDAVALPQVGVPNESQALSQRFTFSPGQDIQLIPPLINLLMSIEPDVIY  
 AGHDNTKPDTSSSLTSLNQLGERQLLSVVKWSKSLPGFRNLHIDDQITLIQYSWMSLMVFLGWRSYKH  
 VSGQMLYFAPDLILNESHRSLSFFKLAKKSSSV

>GCR\_PAROL

MDQGGKLRNCNRDDSLTFGETAVGVGSDTGD TAGSLLQPAAMHLPSPSSLPQLTVAPNGGAGTKDQGEFG  
 GLFESPRGQCEGSEMKEGKI IRLQKRKHLDIGMFMEDNLSLLNQNISDLNRTSTSVISTSDTSVLGKL  
 PLPNLFPQH IKQEGGFSLKELGT YGGHTGGGPCDL DGN SGHLIEDTEIWQDL DLPNSLPEISDFELDSE  
 VAHLDNILHDSSGCGCPDGSLLKETKVLVGNNGNCTDVNGTDQQHPLQHHQHQQQHRHLLHQHQLHH  
 QHQQPPSLLSSVMIKEEKDHDNSFIHIRT PGVVKQEQENGSFCQSQC LQSSMSSLHGGGPMSS TMGAGA  
 VPGYHYKASPSSTVGLQDQKPF GIFS NLPAVAESWTRGRGRFGEPSGIQRGNDGLPSAAMSPFSVSFSSSS  
 PRTGENSSSAVPLSKPSGPTHKICLVCSDEASGCHYG VVTCGSCKVFFKRAVEGWRRARQNTDGQHNYLC  
 AGRNDCIIDKIRRNCPACRFRKCLQAGMNLEARNK KLIKMKVHRPTGSAEPI SNMPVPI PRMPQLVP  
 TMLSVLKAIEPEI I YSGYDSTLPDTSTR LMTTLNRLGGQQVI SAVKWAKSLPGFRNLHLD DQMTLLQCSW  
 LFLMSFSLGWRSYEQCNGNMLCFAPDLVINKERMKLPFMTDQCEQMLKICNEFVRLQVSYDEYLCMKVLL  
 LLSTVPKDGLKSQAVFDEIRMTYIKELGKAIVKREENASQNWQRFYQLTKLLDSMQEMVEGLLQICFYTF  
 VNKTLSVEFPEMLAEI ITNQIPKFKDGSVKPLLFHQK

>Q8JJ91\_HAPBU

MDQGGKLRNGNRDDGLTFAEIEGTGDTPGSLFQTAMHLPSPPPPATVAPNRQGGTNGQGE LGGLFESHQH  
 HVLGEGTDMKEGKMIRMQKQQQQQQQD DIGIFGMGDSLPLFNQCISDTPTSVINTSDTSVLGNLPLPDLF  
 SHPIKTESILSLDKDLGTYSGHTGTGPCDL DGN SGRLIEDTEIWQDL DLPSSLPEISAFELDSEVAHLDN  
 ILQESTGGGCPVGGLPKEIKPLMNGENCTSVNGTKQQHHALHPHQQQQHHQLIHHQHQHPQHQPQAL  
 LSTIIKEEKDPDESFIQICTPGVIKQEKQDNGFCQPQCLQSGISSLHGGGPRPMSSPVS V GAVPGYHYT  
 ANLSSTMDIQDQKPFDMYSNMPLMGD GWARGKRYGETSGIQSSDDGPTPVASLAPFSVGFSGSSPREGEI  
 SSSVPAQSKTSGQTHKICLVCSDEASGCHYG VVTCGSCKVFFKRAVEGQHNYLCAGRNDCIIDKIRRN  
 CPACRFRKCLQAGMNLEARNK KLIKMKVHRAGASEPTI SNMPV PVVPRSMPLVPTMLSILKAIEPEI I  
 YSGYDSTLPDTSSRLMSTLNRLGGQQV SAVKWAKSLPGFRNLHLD DQMTLLQCSWLFLMSFSLGWRSYE  
 QCNGSMLCFAPDLVINKDRMKLPFMTDQCEQMLKICNEFVRLQVSYEEYLCMKVLLLLSTVPKDGLKSQA  
 VFDEIRMTYIKELGKAIVKREENPSQNWQRFYQLTKLLDSMQEMVEGLLQICFYTFVNKTLSVEFPEMLA  
 EII SNQIPKFKDGNVKALLFHQK

>Q8JJ90\_HAPBU

MDQGGKLRNGNRDDGLTFAEIEGTGDTPGSLFQTAMHLPSPPPPATVAPNRQGGTNGQGE LGGLFESHQH  
 HVLGEGTDMKEGKMIRMQKQQQQQQQD DIGIFGMGDSLPLFNQCISDTPTSVINTSDTSVLGNLPLPDLF  
 SHPIKTESILSLDKDLGTYSGHTGTGPCDL DGN SGRLIEDTEIWQDL DLPSSLPEISAFELDSEVAHLDN  
 ILQESTGGGCPVGGLPKEIKPLMNGENCTSVNGTKQQHHALHPHQQQQHHQLIHHQHQHPQHQPQAL  
 LSTIIKEEKDPDESFIQICTPGVIKQEKQDNGFCQPQCLQSGISSLHGGGPRPMSSPVS V GAVPGYHYT

ANLSSTMDIQDQKPFDMYSNMPLMGDGWARGKRYGETSGIQSSDDGPTPVASLAPFSVGFSGSSPREGEI  
 SSSVVPAQSKTSGQTHKI CLVCSDEASGCHYGVVTCGSKVFFKRAVEGWRARQNTDGQHNYLCAGRND  
 IIDKIRRNKNCACFRKCLQAGMNLEARNKLIKMKVHRAGASEPTISNMPVVPVPRSMPLVPTMLSI  
 LKAIPEPIIYSGYDSTLPDTSRLMSTLNRLGGQQVVS AVKWAKSLPGFRNLHLDDQMTLLQCSWLFMS  
 FSLGWRSYEQNGSMLCFAPDLVINKDRMKLPFMTDQCEQMLKICNEFVRLQVSYEEYLCMKVLLLLSTV  
 PKDGLKSQAVFDEIRMTYIKELGKAIVKREENPSQNWQRFYQLTKLLDSMQEMVEGLLQICFYTFVNKTL  
 SVEFPEMLAEIISNQIPKFKDGNVKALLFHQK

>Q5WP01\_ONCMY

METKRYPSFFEGSTDETEKNRWSHVPSSAMDYCCSGAEEADSLNLSNSDVLMDIVNVSCSPSSNTADSKE  
 SNNNNEKKKPEQQPTLKLTONQHQPFLVPLFNSSLHGRKPEMMSKELSKTVAESMGLYMNAAREATDF  
 GGFQGGGHCSPGKMPAGVCGRPCLEDSQCAASTGSPKLMSPSTGFLKQPSSTPGDCCSSGTPSGSAVL  
 GLSLSCSPQAPSSISSPGGSNNLVSSSTTSPTCFGGPFTCTTISNPVNQHNAAGPALAHNHVHRRNSATCS  
 PAGSSTVGSPLTSPNLVMSRPISSPQSMSSVRSPPSCSTSTNMRSSSVSSPTGSTNNMRASSISSPTS  
 GGPMASSSPRNPSSGGGGFAVSSPASELGLVQNDNSNPEGRRDQDFKEFEFPKVESVDGEMFNVGLDH  
 MGMVKFIKNEPDTDYRSMCLGNGSNNTKCNQATGCPGNGSPFITQIKSEPNKGGGCMNPQCYTEQQQQH  
 SMGLFQSGPSEITYLSLRDNI DEYSLSGILGPPGTEMNGSYEAGVFPHNLLSKVKQENNDGSYYQENNNN  
 VVPTSAIVGVNSGGHSFYHQIGAQGTMSFSRHDPRDHGTNPLLNLI SPVTALMESWKS RPGMSQGRGEG  
 YPGHGCMPDSMSASLRHPSSTAKVCLVCGDEASGCHYGVVTCGSKVFFKRAVEGQHNYLCAGRND  
 DKIRRNKNCACFRKCLQAGMNLGARKSKKLGKLGKLVNEDSTPTKEGGQTCPGSGGGYLSSGEKELSTSP  
 TNALVPHGPGGGLVTPYLPSSICSVLELIEPEVVFAGYDNTQPDTTDHLSSLNQLAGKQIRVVKWAKV  
 PPGFRGLPIEDQITLIQYSWMCLSSFSLSWRSYKHTNGQMLYFAPDLVFNEDRMQQSAMYDLCLGMRQVS  
 QEFVRLQLTYQEFLSMKVLLLLSTVPKEGLKNQAAFEEMRVNYIKELRRSVGKATNNSGQTWQRFQTLK  
 LLDAMHDLVGNLLDFCFYTFRESQALKVEFPEMLVEIISDQIPKVESGNTHHTLYFHKK

>Q9I8F5\_9TELE

MEACESPEAVFHGSYQSLFQNVRVKRANNESLDISSKCKGFLQETASREMRLSKLSPRRGILRSPEKEC  
 ESTISVIQLAASRIHFLKSSSTESKSDSSLSGGLADATESSDSRAGFLRGAESGQKGYGAAEVHKHEL  
 GSGRDASVASC SRACSSGITISETARELCKAVSVSLGLAMESSELGEVGP HHAPPLTTESSDEMYPLL  
 DCSVSEPGAGAKDREYALAMGQRDRGLELRGRDKVLGMFKSSDLVQLAGDVTTSQYSNASKSHLTSALQE  
 VHEFASMSGDIANPSSEGTAASDMDATHAASCQFEQLLPASMAHFVHPEFENGPSQSFAKPSAMSGEFTE  
 NYANQYNV KIKAE MMPDLNGTWAYPHRYADDSNGQYGP PKQRTTYATDHETPFISNPYEQSGSLVPR  
 ERPPPEQWYPVGMGRPPYPNVPCVKNEVGEWLDVTSLTDGRFDAGRSDIFPMEFFLPPQRTCLICSDEA  
 SGCHYGALTCGSKVFFKRAAEGKQKYL CASRNDCTIDKLRRNKNCPSCLRRCFEAGMTLGARKLRKIGQ  
 VKGPDEVGSVQGPSESAQCLSPKCLTFHSQLIFLNI LEAIEPEVNVNAGHDHAQPDSAAALLTSLNELGE  
 RQLVKVVKWAKGLPGFRNLHVDDQMTVIQHTWMGMVMFALGWRSYK NANARMLYFAPDLVFNDRRMHISS  
 MYEHCIQMKHLSQEFVLLQVTQEEFLCMKALLLFSIIPVEGLKSQKYFDELRLTYINELDRLINYGRKSN  
 CAMRFQQLTRMMSLQPIVQKLHQFTFDLQVARSPLTKVSPFEMIAEII SVQVPKILAGLSKPI LFHK

>Q8UWB7\_ORENI

MSQTTRELFCAKIWPEDRKS YTG DVVSAASMAQKTEESRVYFTKTPAGSSAASLAESANANLYGHI IPLA  
 CDMEKRCCQTAAAPQEELSAECRVGDSRSFSACAT ISETARELCKAVSVSLGLAMESGDTSETHVSLPQC  
 AANDQMSAEYLFGEAVPANCPGAPASLSEYRCPERDERPPHDHKQVKMLKSSEPAAAFHLLSSTATSV  
 NAQNFTLCEADDITPKEIDHLDIACAASCPYAPAAPEPLAQFGPAAAQRPCRAYNPVEEAGDVG DAGRIG

PWGFRQNGTASKSNLREVHLQGRYGSPLITAFGDKYNSQFWGSRQCMNLQSSGANSAFICNPYDGTVMR  
 REQWYPGGMLRTPYPNSNYMKGEVGEWLDVTYNDTRFESSREHMFPMEFFFPQRTCLICSDEASGCHYG  
 ALTCGCKVFFKRAAEGKQKYLCAASKNDCTIDKLRRKNCPCRLKCCFEAGMTLGARKLKKIGQQKSPKE  
 DHGAQDPVEVIPNVSPKTVQVQVNSHLVFLNILESIEPEVVNAGHDCGQPDADTLLTSLNELGERQLVKV  
 VKWAKGLPGFRNLHVDDQMTIIQQSWMGVMVFALGWKSYKNASGRILYFAPDLVFNEHRMHVSTMYEHCI  
 RMRHLSQEFEMLQITQEEFHCMAKALLFSIIPVEGLKSQKYFDELRLTYINELDRLINFQTTNTSQRFY  
 QLTRLMDSLQMTVKKLHQFTFDLFDVQAQSLHTKVSFPPEMIGEII SVHVPKILTGLAKPILFHK

>O93245\_ONCMY

MEIPVGLGGVCDSPNIVFRGPFQNVFHNKATLPSNTTVTETLDFSSSYFMQNKHPWEMRQTNRQSPRK  
 EISSGTARNSDIEVKEDDSISFSRTLES DARRIHFAKSSSTGNKTFSSVNELDYPNANGYSGRPGPLAC  
 NTKQCCQPAVPHHGVELSPNSYARVANSCSNSACTTISETARELCNAVSVSLGLTMDLNMNDLGPNYA  
 PSSANDQSQGNLYFQVPLNCSGAEENVSITEYKCPSEARNARPLQSDTRVKMFKSSPANDLTHEEVATMEH  
 LSSRHPSTGEQEFRLNEKSDDPTSKETENSLSTRARSASCHFDPLLPALAHAFSQTDPDRISSHVIPA  
 CETGETMEDKYADYLQQQYSVKIKYEASNEPAGTSWGSQYNGYNDNDNTQYGPRQGMNPFYAGPDSGFI  
 CNPYEYERGGGLVRRERPTSEQWYPGGMLGRMPYPNSPYLKNEVDWLDVSYTDARFEGGRDHMFMEFF  
 FPPQRTCLICADEASGCHYGALTCGCKVFFKRAAEGKQKYLCAASKNDCTIDKLRRKNCPCRLKCCFEA  
 GMTLGARKLKKIGQLKSPEEDLPTQGPDAIQCVSPQSGLTFHSQLVFLNILESIEPEVVNAGHDCQPD  
 SAAVLLTSLNELGERQLVKVVKWAKGMPGFRNLHVDDQMTVIQHSWGMVMVFLGWRSYKNVNARMLYFA  
 PDLVFNDRMHISMSFEHCIRMRHLSQQFVLLQVTQEEFLCMKALLFSIIPVDGLKSQKYFDELRLTYI  
 NELDRVINYGRKSNCSQRFYQLTRLMDSLQPIVRKLQQFTFDLFIQAQSLPTKVSFPPEMIAEII SVHVPK  
 ILAGLAKPILFHK

>Q8QFV7\_HAPBU

MSQTSRQLFCAKIWPEDRKS YTGNNVTAASMAQKTEESRVYFTKTPTGSSAGSLAESENANLYGSGNIIP  
 LACDMEKRCCQTAAAPQEELSSECRVGDIRSFSACATISETARELCNAVSVSLGLTMEGDTSEAHVSLP  
 PCAANDQMSAEYLFGEVAVPANCPGAPASLSDYRCPERDERPPHDKQVKMFKSSEPAAAFHHLTSTAT  
 SVNAQNFTLCLADDITPKEIDHLDLACAASCPYAPAAPEPLAQFGPAAAQRPCGAYNSVEEAGDVDAVE  
 NRSTGFQAERYGVKVKSEGSASAGASWVSRPNYSFGDKYNSQFWGSRQCMNVQSSGANPPFICNPYDGTV  
 MRREQWYPGGMLRTPYPNSNYMKGEVGEWLDVTYNDTRFESSREHMFPMEFFFPQRTCLICSDEASGCH  
 YGALTCGCKVFFKRAAEGKQKYLCAASKNDCTIDKLRRKNCPCRLKCCFEAGMTLGARKLKKIGQQKSP  
 EEEHGAQDPVDPHVS PKSGVQVNSHLVFLNILESIEPEVVNAGHDYGPDSAATLLTSLNELGERQLVKV  
 VKWAKGLPGFRNLHVDDQMTIIQQSWMGVMVFCALGWRSYKNAGGRMLYFAPDLVFNEHRMHVSTMYEHCI  
 RMRHLSQEFEMLQITQEEFLCMKALLFSIIPVEGLKSQKYFDELRLTYINELDRLINFQTTNTSQRFY  
 QLTRLMDSLQMTVKKLHQFTFDLFDVQAQSLHTKVSFPPEMIGEII SVHVPKILAGLAKPILFHK

>O93497\_PAGMA

MSQTSQGLSCTKIWSRGEKVKTGDAVSAPSMAQNTTEESPLRVSRNSTGNGAGRMREADNADPNTYESGHM  
 IPLVCDMEKHCCQTAAAPQEELFNADCRVGD SRSFSACATISETARELCNAVSVSLGLAMESNDPDSMDA  
 ALSQCAANDQLRGEYLFVGGAAPLSCPGAQA AVSEYKCPPEERPLHGKQKQQLMDMFKSSETGAHLQHLT  
 STRTPVDEHNFTLCKAEDLTPEETAHQDSVRAACPYAQSALPGNMAHF GSPAPERPWQLYKPPDEAGDF  
 GEVMSERFVTSQYQPEQYSVKIKCEDTESAGALWGGNYTFNDRYNSQCWGPQCMNAHSTGANSALCHPY  
 ERSVARPEHWYPGGMLRSPYPNSSYVKSEVGEWLDVYPYSDPRFDSSEHMFPMEFFFPQRTCLICSDEA  
 SGCHYGALTCGCKVFFKRAAEGKQKYLCAASKNDCTIDKLRRKNCPCRLKCCFEAGMTLGARKLKKIGQ

HKNSDEDHPLQEPAEVMPNISPKSGLSFNSQVFLNVLESIEPEVVNAGHDYGQPD SAATLLTSLNELGE  
 RQLVKVVKWAKGLPGFRNLHVDDQMTVIQHSWMGVMVFGLGWRSYKVNNGRMLYFAPDLVFNEHRMHIST  
 MYEHCIRMRHLSQEFLLLQITQEEFLCMKALLFSIIPVEGLKSQKYFDELRLTYINELDRLINYRMTN  
 CSQRFYQLTRLLDSLQMTVKKLHQFTFDLQVQAQSLPTKVSFPPEMIGEII SVHVPKILAGLAKPILFHE

>ANDR\_RANCA

MEVHIGLGGVYKQPPGKMIRGAFENLFLSVREALQGERRSAASLDTSSPISACVHPHPTWNEPSTWTEVR  
 GTPWREPQGAQPDPPPCSPRSQAPQFTLSSCTTELKEILGEQGGMPEEGNSESESASKEGYPESISDSAKEYI  
 CKAVSVSLGLSMEALEHLSAAGEWQRGDCMFA GPPHHTMGAQTCQVAEEDKSDTSFSQYREGAFRRAGQS  
 TYSAGKAPEDGSSLP TEDKEQPCTDMALSEPGLSLRSRGMVMPSLTLYKPTAFMEDASAYPGRDYYSFQM  
 ALAPHGRIKVESPIEFAGSAWGGPSRYSEFPGF SHCGPSANWHSLFEEGQATASYTDSLSLYSRSHVPA  
 GPDGEFSAEAWYPATAMLGRVHMAVPMRPRMTHGWTATLGI RRRRLGWTGVESTFYPI DYYFPPQKPCLS  
 EDEASGCHYEALTCGSCVKVFFKRAAEGNQYL CASRNDCTIDKFRRNKPCSCRLRKC YEAGMTLGARKLK  
 KLGNLKAQEELEGS PGQSEGREMPNMSIPQLE GYSCQPIFLNVLEAIEPMVVC SGHDNNQPDSFALLS  
 SLNELGERQLVHVVKWAKALPGFRNLHVNDQMTVIQYSWMGLMI FAMGWR SFKNVNSRMLYFAPDLVFNE  
 YRMHKSRYMSQCVRMRHLSQEFGLQVTP EEFLCDEGPSALSII PVEGLKDQKCFDEL RMNYIKELDRVI  
 SCKRNNPASSPRFFNLPKLLGSVQPIDVNLVQFTFGLFGKAQMVSVDFPEMMSEIISVQVPKILSGRVK  
 PLYFHSS

>Q66VR6\_MICUN

MSQTNRELS CNTIWPEGEKVKTS DAVRAP SMAQNT EESRGYFTKNSTGNGAGKADSITYRS GHIHPPVCD  
 MEKQCCQTAAAPQEELNAECRVGDSRSFSACAT ISETARELC KAVSVSLGLTME SNTSDMDPALTQCA  
 SNGHTRGGDYLFVGVVPPNCPGAQGA VTD RDRPMRGQQLVEMFKSSETVAAAASARLQHPGSTR TSA  
 DEQNFTLCKVDDITSEEIDHLDTARAASCHYAQSAPS NLAHFSHAERPCRVYKPPDEERDFGETMENKFG  
 GYQPEQYGVKVKSEDESESLWGTNYTFNDKYN SQLWGT RQCMNAHNAGANTTFICTPYERSMVRPEQWYP  
 GGMLRPTYPN SNYVKTEVGEWLDVAYNDTRFEAGREHMF PMEFFFPQRMCLICSDEASGCHYGALTCGS  
 CKVFFKRAAEGKQKYL CASKNDCTIDKLRRKNCP SCRLRKC FEAGMTLRARKLKKIGQQKNPEEDHSVQD  
 PSEVMQNI SPKSGLNFSQTVFLNILESIEPEVVNAGHDYGQPD SAATLLTSLNELGERQLVKVVKWAKG  
 LPGFRNLHVDDQMTVIQHSWMGVMVFALGWR SYKVNNGRMLYFAPDLVFNEHRMHISTMYEHCIRMRHLS  
 QEFQLLQITQEEFLCMKALLFSIIPVEGLKSQKYFDELRLTYINELDRLVNYRMTTNC SQRFYQLTRLL  
 DSLQMTVKKLHQFTFDLQVQAQSLPTKVSFPPEMIGEII SVHVPKILAGLAKPILFHE

>Q60I32\_GAMAF

MSQTSRQLSCSSVWSGVKKIKAGDAVRALGMAQKTEENPDGFTKSCAGNARFDES DNNARSCGSGCVNPP  
 ARDMEARCCQTAAAPQEELLNADTRSFSACAT ISETARELCRAVSVSLGLTMESSDMSDVDAALPPCAAN  
 DQISGEYFFGVDAAAVSCPDAQTQIT YRCPDREERP VHGQKPAVKMYKSSETPAHFHHLASSRTSVNAQN  
 FTPCEAEDTDHLNAARTVSCPYAPDHLVQYAHTSTAAAANERPCRAAYNPQEGVRDFVEAPESDSGGYQP  
 DQYSVKIKSEGNDGWSF WGGGYTFNKRYNTQFWGSRQCMNAHESGPNAAFICNPYEGSVVRPEQWYPGG  
 MLRTPYPNSGDMKSQVGEWLDVVYNDTRFEAGREHMF PMEFFFPQRTCLICSDEASGCHYGALTCGSCK  
 VFFKRAAEGKQKYL CASKNDCTIDKLRRKNCP SCRLRKC FEAGMTLGARKLKKIGQQKNPEEEHPQEAP  
 EVPHNMSPKSGPSLNSQMVF LNILESIEPEVVNAGHDCGQPD SAAGLLTSLNELGERQLVKVVKWAKGLP  
 GFRNLHVDDQMTVIQQSWMGVMVFALVWRSYKVNNGRMLYFAPDLVFNEHRMQISTMYEHCIRMRHLSQE  
 FVLLQITQEEFLCMKALLFSIIPVEGLKSQKYFDELRLTYIKELDRLINYQMTTNC PQRFYQLTRLLDS  
 LQMTVKKLHQFTFDLQVQAQSLHTKVSFPPEMIGEII SVHVPKILAGLAKPILFHK

>Q9PWG5\_ANGJA

MSQTNGQIFSKGQFHGTSRNLDTTELQEADSANFPMQPEAEARRIHFTKSSDSKGDSSILEPDNAQENAYG  
 PFLSDLHDCCTDQKSSLPTAPRNRREINPHSDACVSNCSSESACTTISETARELCKAVSVSLGLNMDNSNE  
 MNEPGHNLASSLGSDLRKNFMFEVFPFLGSSGTQESVPRAEYKCARLHDGQLLQNDLSGMFKTTHVQGLT  
 NEVAPSHLSSSYSNWDTQETRLNAETETSASKEQASCMTMDAARSGFCQFDQLLPTTLAQYSQIDPLSMG  
 RSNFRSQFFYKTLALANEAVEHAEGRYVDSSIQYSPKIKTENLQNSGGSDHQRYNENWHSQYGPSRH  
 GLHPYCTETNNQFVVEPFQYRGGGLLPRDRSASESWFPGMLSKMPSTNLPCLKTEVADWLEVPKSDRM  
 LLEGGREHVFPMEFFFPQRTCLICADEASGCHYGALTCGSCVKVFFKRAAEGKQRYLCASRNDCTIDKLR  
 RKNCPSCRLKCKFEAGMTLGARKLKKIGQLKPPDELPTQAPTDAIQCISPKPGLSFPTQSVFLNILESIE  
 PEVVNAGHDYQDTSAAATLLTSLNELGERQLFKVVKWAKGLPGFRNMHVDDQMTVIQHAWMGVMVFALGW  
 RSYKVNARMMLYFAPDLVFNDRMRVSSMYEHCIRMRHMSQEFVLLQVTHQEFKMKALLLSIIPVEGL  
 KNQKYFDDLNTYINELDRLINCSRKTNCSQRFIQLTRLMDSLQPIVKKLHQFTFDLQVQAQSLHTKVN  
 PEMIAEIIISVHVPRILAGMAKPILFHN

>Q6IVJ3\_DICLA

MDKGGVKKITYRRDHLKLVYTESPEEGLLKVAPHASMSIASATSVNLPSSPLMQPGQVFNGLSNSPL  
 PEELTSVTATVGSLLLEDHESRGLTRDQKLQQLLQTTSTTFGRQTLRENLPHEASIAIDITSMDSLIGG  
 SDPNFFPMKTEDFSMDEGDQEPIDLDHAFEHIGKDVVDVHQKLFSDNALDLLQDFELTGPSDFYVGD  
 LSSLADDSLLGDVSSERDIKPAVVEVMNGCGAVSVSLNGNMTSPDQSCSSISTTASLPTTTLSALVKK  
 EKDAGFIQLCTSGVIKQEKSSAGQSYCQMSGTSSDMPNSNPISICGVSTSGGQYRFGVNPSTNEAQOH  
 KDQKLVSSIIYLPVTTISGPWNRSQGVGDNSAMHGASEAFSSSYPI SFASSTRQEGVIAPSSAQTKSGTH  
 KICLVCSDEASGCHYGVTFCGSCVKVFFKRAVKGQHNYLCAGRNDICIIDKIRRNCPACRFKCLMAGMNL  
 EARKTKKLNRLKGAQPSNPPPEMTTPPPIEARSVLPKMPQLVPTMLSLLKAIPTIYAGYDSTLPDST  
 RLMTTLNRLGGRQVISAVKWAKSLPGFRNLHLDDQMTLLQCSWLFLMSFGLGWRSYQQCNGSMLCFAPDL  
 VINEERMKLPYMAQCEQMLKISSSEFVRLQVSHDEYLCMKVLLLLSTVPKDGLKSQAVFEDIRMSYIKEL  
 GKAIVKREENSSQNWRQFYHIPLLDYWGRSGGLNIIINIRVGAIFSTSHLKSQYTKDWYSITVLSLHLLKPL  
 QGTKCSYRT

>Q8NG44\_HUMAN

MTELKAKGPRAPHVAGGPPSPEVGSPLLCRPAAGPFPGSQTSDTLPEVSAIPIISLDGLLFPRPCQGQDPS  
 DEKTQDQQLSDVEGAYSRAEATRAGAGSSSSPPEKDSGLLDSVLDLTLAPSGPGQSQPSPPACEVTSSW  
 CLFGPELPEPAPAPATQRVLSPLMSRSGCKVGDSSGTAAAHKVLPRGLSPARQLLLPASESPHWSGAPV  
 KPSPQAAAVEVEEEDGSESEESAGPLLKPKRALGGAAAGGAAAVPPGAAAGGVALVPKEDSRFSAPRV  
 ALVEQDAPMAPGRSPLATTVMDFIHVPIPLNHALLAARTRQLEDESYDGGAGAASAFAPRRSSPCASS  
 TPVAVGDFPDCAYPDAEPKDDAYPLYSDFPALKIKEEEEGAEASARSPRSYLVAGANPAAFDFPLG  
 PPPPLPRATPSRPGAAVTAAPASASVSSASSSGSTLECIKYKAEGAPPQGGPFAPPCKAPGASGCLL  
 PRDGLPSTSASAAAAGAAPALYPALGLNGLPQLGYQAAVLKEGLPQVYPPYLNLYLRPDSEASQSPQYSFE  
 SLPQKICLICGDEASGCHYGVLTCGSCVKVFFKRAEGRKFKFNKVRVVRALDAVALPQVGVPNESQAL  
 SQRFTFSPGQDIQLIPPLINLLMSIEPDVIYAGHDNTRKPDTSSSLLTSLNQLGERQLLSVVKWSKSLPGF  
 RNLHIDDQITLIQYSWMSLMVFLGWRSYKHVSGQMLYFAPDLILNESHRSLSFFKLAKKSSSV

>Q801Z1\_GASAC

MENPCCQTAAAPQEELLNADCRVGDSSRSFSACATISETARELCKAVSVSLGLTMEPNASDLDAVFPFCA

ASEQTRGEYLFMNVNCPGGAYKYPDRDDRPLHGQKQLVEMFKSSETAARLQHVGTPTRASAHERNFAPCE  
 ADEVTSEEIEHLDAAHASSCEYAPAAPGNFAHFGRSAAPRACRIYEHPSAADFGGATENKFGGYQPAQY  
 GVVKKCEDGESAGAPWAGVYTPNEKYDAQCWGSRQCMNAHGTDTNPAFACNPHERSVVRPEQWYFPGMLR  
 PSYPNSNYVKTEVGEWLDVTYNDTRFEAGREHMFPMEFFFPQRMCLICSDEASGCHYGALTCGSKVFF  
 KRAAEGKQKYLCAKNDCTIDKLRRKNCPSRLKCKFEAGMTLGARKLKKIGQKIPPEEPPLKDFLEVI  
 QNFSPKSGLNFNMQMVFNLILESIEPEVVNAGHDYQPDASAASLLTSLNELGERQLVKVVKWAKGLPGFR  
 NLHVDDQMTVIQHSWGMVMVFALGWRSYKVNNGRMLYFAPDLVFNEHRMQMSTMYEHCIRMRHLSQEFLL  
 LQISQEEFLCMKALLLFSILPVEGLKSQKYFDELRLTYINELDRLISYRMAANCPQRFYQLTRLLDSLQM  
 TVKKLHQFTFDLQVQAQSLPTKVSFPEMIGEIIISVHVPKMLAGLAKPILFHE

>Q8NG45\_HUMAN

MTELKAKGPRAPHVAGGPPSPEVGSPLLCRPAAGPFPQSQTSDTLPEVSAIPIISLDGLLFPRPCQGQDPS  
 DEKTQDQQLSLSDVEGAYSRAEATRAGGSSSSPPEKDSGLLDSVLDLTLAPSGPGQSQSPSPACEVTSSW  
 CLFGPELPEPDPAPATQRVLSPLMSRSGCKVGDSSGTAAAHKVLPRGLSPARQLLLPASESPHWSGAPV  
 KPSPQAAAVEVEEEDGSESEESAGPLLKKGKPRALGGAAAGGAAAVPPGAAAGGVALVPKEDSRFSAPRV  
 ALVEQDAPMAPGRSPLATTVMDFIHVPILPLNHALLAARTRQLLEDESVDGGAGAASAFAPRRSSPCASS  
 TPVAVGDFPDCAYPDAEPKDDAYPLYSDFPQALKIKEEEEEGAEASARSPRSYLVAGANPAAFPDFPLG  
 PPPPLPRATPSRPGEEAAVTAAPASASVSSASSSGSTLECIKYKAEGAPPQQGPFAPPCKAPGASGCLL  
 PRDGLPSTSASAAAAGAAPALYPALGLNGLPQLGYQAAVLKEGLPQVYPPYLNLYLRPDSEASQSPQYSFE  
 SLPQKICLICGDEASGCHYGVLTCGSKVFFKRAMEGQHNYLCAGRNDICVDKIRRNCPACRLRKCCQA  
 GMVLGGFRNLHIDDQITLIQYSWMSLMVFLGLWRSYKHVSGQMLYFAPDLILNDSFGRATKSNPV

>Q8NG43\_HUMAN

MTELKAKGPRAPHVAGGPPSPEVGSPLLCRPAAGPFPQSQTSDTLPEVSAIPIISLDGLLFPRPCQGQDPS  
 DEKTQDQQLSLSDVEGAYSRAEATRAGGSSSSPPEKDSGLLDSVLDLTLAPSGPGQSQSPSPACEVTSSW  
 CLFGPELPEPDPAPATQRVLSPLMSRSGCKVGDSSGTAAAHKVLPRGLSPARQLLLPASESPHWSGAPV  
 KPSPQAAAVEVEEEDGSESEESAGPLLKKGKPRALGGAAAGGAAAVPPGAAAGGVALVPKEDSRFSAPRV  
 ALVEQDAPMAPGRSPLATTVMDFIHVPILPLNHALLAARTRQLLEDESVDGGAGAASAFAPRRSSPCASS  
 TPVAVGDFPDCAYPDAEPKDDAYPLYSDFPQALKIKEEEEEGAEASARSPRSYLVAGANPAAFPDFPLG  
 PPPPLPRATPSRPGEEAAVTAAPASASVSSASSSGSTLECIKYKAEGAPPQQGPFAPPCKAPGASGCLL  
 PRDGLPSTSASAAAAGAAPALYPALGLNGLPQLGYQAAVLKEGLPQVYPPYLNLYLRPDSEASQSPQYSFE  
 SLPQKICLICGDEASGCHYGVLTCGSKVFFKRAMEGQHNYLCAGRNDICVDKIRRNCPACRLRKCCQA  
 GMVLGGFRNLHIDDQITLIQYSWMSLMVFLGLWRSYKHVSGQMLYFAPDLILNEQSIVTS

>ESR1\_PIG

MTMTLHTKASGMALLHQIQANELEPLNRPQLKIPLERPLGEVYVDSSKPAVYNYPEGAAYDFNAAAAASA  
 PVYQSGSLAYGPGSEAAAFGANGLGGFQPLNSVSPSPLVLLHPPPQLSPFLHPHGQQVPPYLENEPSGYA  
 VREAGPPAFYRPNNDNRQGGRELRASDCKGSMAMESAKETRYCAVCNDYASGYHYGVWSCEGCKAFFK  
 RSIQGHNDYMCNATNCTIDKNRRKSCQACRLRKCYEVGMMKGGIRKDRRGGRMLKHKRQRDDGEGRNEA  
 VPPGDMRSANLWPSPLLIKHTKKNVSLTADQMISALLEAEPPIIYSEYDPTPLSEASMGLLTLNLA  
 DRELHVHMINWAKRVPGFLLDLSLHDQVHLLCAWLEILMIGLVWRSMEHPGKLLFAPNLLLDNRNQGKCVG  
 MVEIFDMLLATSSRFMMNLQGEFVCLKSIILLNSGVYTFLSSTLKSLEEKDHIHRVLDKIDTTLIHLN  
 AKAGLTLQQHRRLAQLLLILSHFRHMSNKGMEHLYNMKCKNVVPLYDLLEMLDAHRLHAPTNLGGPPP  
 EDMSQSQLATSGSTPSHSLQMYIITGEAENFPTTI

>Q9DDZ4\_MICSA

MCKRQSPAQSKQPCGTVLRPRIGPAFTELETLSPQHPSPLRAPLSDMYPEESRSGGGGATVDFLEGTYD  
 YVAPTVPPTPLYSHSGYYSAPLDAQGPPSDGSLQSLGSGPTSPLVFPSSPRLSPFMHPPSHHYLETTST  
 PVYRSSVLSQQPVPREDQCATSDESYCVGESGAGAGGFEMAKEMRFCVCSYASGYHYGVWSCEGCKA  
 FFKRSIQGHNDYMC PATNQCTIDRNRKSCQACRLRKC YEVGMMKGGV R KDRGRVLRDRKRRAGTNRDK  
 ASKDLEYRTVPPQDRRKHS SSSAGGGGGKSSVTGMS PDQVLLLLQGAEPMLCSRQKLSR PYTEVTIMTL  
 LTSMAKELVHMITWAKKLPGLQLSLHDQVQLLESSWLEVLMI GLIWRSIHCPGKLIFAQDLIILDRNEG  
 DCVEGFVEIFDMLLATASRFRMLK LKPEEFVCLKAI ILLNSGAFS FCTGTMEPLHNSVEVHMLDTITDA  
 LIHHISQSGCSAQQQSRRQAQLLLLLSHIRHMSNKGMEHLYSMKCKNKVPLYD L LLEMLDAHRIHRPDRP  
 AQFWSQADGEPFFITVNNCNSSSNGGVSSSVGSSSGPRVSHESPSRGPTGPGVLQYGGSRSDCTHIL

>ESR1\_BOVIN

MTMTLHTKASGMALLHQIQANELEPLNRPQLKIPLERPLGEVYMDSSKPAVYNYPEGAA YDFNAAA PASA  
 PVYQSGPLPYGPGSEAAAFGANGLGAF PPLNSVSPSPLVLLHPPPQLSPFLHPHGQQVPYYLENESSGY  
 AVREAGPPAYRPNSDNRRQGGRELASTSDKGS MAMESAKETRYCAVCNDYASGYHYGVWSCEGCKAFF  
 KRSIQGHNDYMC PATNQCTIDKNRRKSCQACRLRKC YEVGMMKGGIRKDRRGGRMLKHKRQRDDGEGRNE  
 AVPSGDMRAANLWPSPI MIKHTKKNSPVLSLTADQMI SALLEAEPP IYSEYDPTRPFSEASMMGLLTNL  
 ADRELVHMINWAKRVPGFVDLALHDQVHLL ECAWLEI LMIGLVWRSMEHPGKLLFAPNLLDRNQKGCVE  
 GMVEIFDMLLATSSRFRMMNLQGE E FVCLKS I ILLNSGVYTFLSSTLRSLEEKDHIHRVLDKI TDTLIHL  
 MAKAGLTLQQQHRRLAQLLLILSHFRHMSNKGMEHLYSMKCKNVVPLYD L LLEMLDAHRLHAPANFGSAP  
 PEDVNQSQLAPTGCTSSHSLQTYYYITGEAENFPSTV

>ESR1\_HUMAN

MTMTLHTKASGMALLHQIQGNELEPLNRPQLKIPLERPLGEVYLDSSKPAVYNYPEGAA YEFNAAAAANA  
 QVYQGTGLPYGPGSEAAAFGSNGLGGFPPLNSVSPSPLMLLHPPPQLSPFLQPHGQQVPYYLENEPSGYT  
 VREAGPPAFYRPNSDNRRQGGRELASTNDKGS MAMESAKETRYCAVCNDYASGYHYGVWSCEGCKAFFK  
 RSIQGHNDYMC PATNQCTIDKNRRKSCQACRLRKC YEVGMMKGGIRKDRRGGRMLKHKRQRDDGEGRGEV  
 GSAGDMRAANLWPSPLMIKRSKKNLALS LTADQMV SALLDAEPP ILYSEYDPTRPFSEASMMGLLTNLA  
 DRELVHMINWAKRVPGFVDLTLHDQVHLL ECAWLEI LMIGLVWRSMEHPGKLLFAPNLLDRNQKGCVEG  
 MVEIFDMLLATSSRFRMMNLQGE E FVCLKS I ILLNSGVYTFLSSTLKSLEEKDHIHRVLDKI TDTLIHLM  
 AKAGLTLQQQHRLAQLLLILSHIRHMSNKGMEHLYSMKCKNVVPLYD L LLEMLDAHRLHAPT SRGGASV  
 EETDQSHLATAGSTSSHSLQKYYITGEAEGFPATV

>ESR1\_MOUSE

MTMTLHTKASGMALLHQIQGNELEPLNRPQLKMPMERALGEVYVDNSKPTVFNYPEGAA YEFNAAAAANA  
 AASAPVYQSGIAYGPGSEAAAFSANS LGAFPQLNSVSPSPLMLLHPPPQLSPFLHPHGQQVPYYLENEP  
 SAYAVRDTGPPAFYRSNSDNRRQNGRERLSSSNEKGNMIMESAKETRYCAVCNDYASGYHYGVWSCEGCK  
 AFFKRSIQGHNDYMC PATNQCTIDKNRRKSCQACRLRKC YEVGMMKGGIRKDRRGGRMLKHKRQRDDLEG  
 RNEMGASGDMRAANLWPSPLVIKHTKKNSPALSLTADQMV SALLDAEPPMIYSEYDPSRPFSEASMMGLL  
 TNLADRELVHMINWAKRVPGFGLNLHDQVHLL ECAWLEI LMIGLVWRSMEHPGKLLFAPNLLDRNQGK  
 CVEGMVEIFDMLLATSSRFRMMNLQGE E FVCLKS I ILLNSGVYTFLSSTLKSLEEKDHIHRVLDKI TDTL  
 IHLMAKAGLTLQQQHRRLAQLLLILSHIRHMSNKGMEHLYNMKCKNVVPLYD L LLEMLDAHRLHAPASRM  
 GVPPEEPSQTQLATTSSTSAHSLQTYYPPEAEGFPNTI



>Q7SZI0\_FUNHE

MYKQNPVQSKEAFGPALRPRLSPASSELETLSPRLPPSPRASLGDMYPEESRSGSGVAAVDFLEGTYD  
 YATPTPAPTPLYSHSTTGYYSAPLDAQGPPSDGSLHSLGSGPSTPLVFPVPTSPRLSLFMHAPSQHYLETA  
 STPVYRSSHQPASREDQCDTRDEACSVGELGAGAGAGAAAGGFEMAKETRFCAVCSYASGYHYGVWSCE  
 GCKAFFKRSIQGHNDYMC PATNQCTIDNRNRKSCQACRLRKCIEVGMKGGVRKERGRVLRDRKRRTAIS  
 DREKAVKGLEPKTSPHQDKRKRGSALGGDRSSVASLPSEQVLLLFQGAEPPIILCSRQKLSRPHYTEVTMMT  
 LLTSMADKELVHMIAWAKKLPGFLLQALHDQVLLLESSWLEVLMIIGLIWRSIHCPGKLI FAQDLIILDRNE  
 GDCVEGMTEIFDMLLATASRFRMLKLPKPEEFVCLKAI ILLNSGAFSFCGTGTMEPLHDSVAVQNMLDITD  
 ALIHHISQSGFSVQQARRQAQLLLLLSHIRHMSNKGMEHLYSMKCKNKVPLYDLLLLLEMLDAHRHHPVKP  
 SQDGKSPSTSSFGAGCEGSSSAGSSSGPRGSDNLMRIP SAPGVLQYGGSRSDCAQVL

>ESR1\_HORSE

MTMTLHTKASGMALLHQIQGNELETLNLPQFKIPLERPLGEVYVVESSKPPVYDYPEGAAYDFNAAAAASA  
 SVYQSGSLAYGPGSEAAAFGANGLGGFPPLNSVSPS QLMLLHPPPQLSPYLHPPGQVPYYLENEPSGYS  
 VCEAGPQAFYRPNADNRQGGRELRASSGDKGSMAMESAKETRYCAVCNDYASGYHYGVWSCEGCKAFFK  
 RSIQGHNDYMC PATNQCTIDKNRRKSCQACRLRKCIEVGMKGGIRKDRRGGRMLKHKRQRDDGEGRNEA  
 GPSGDRR PANFWPSPLLIKHTKKISPVLSTAEQMISALLDAEPPVLYSEYDATRPFNEASMMGLLTNLA  
 DRELVHMINWAKRVPGFVDLSLHDQVHLLCEAWLEILMIGLVWRSMEHPGKLLFAPNLLLDRNQGKCV  
 MVEIFDMLLATSSRLRMMNLQGEFVCLKSI ILLNSGVYTFLSSTLKSLEEKDHIHRVLDKMTDTLIHLM  
 AKAGLTLQQRRLAQLLLILSHIRHMSNKGMEHLYSMKCKNVVPLYDLLLLLEMLDAHRLHAPANHGGAPME  
 ETNQSQLATTGSTSPHSMQTYIITGEAEGFPNTI

>ESR2\_ONCMY

MHQQSPVDDVTALNSSALTMSEYPEGESPLQLQDVDSRVGGHILSPIFNSSPSLPVESHVPCIQSPYT  
 DLGHDFTTLPFYSPALLGYGTSPLSECSVRSLSPTLFWPPHSQVSSLALHQHTRLQONHPTGGTWTE  
 LTPHDHSEEEYRKPLVKRVADAEETSTSLRGKADMHYCAVCSYASGYHYGVWSCEGCKAFFKRSIQGH  
 DYICPATNQCTIDKNRRKSCQACRLRKCIEVGMKCGLRDRGSYQQRGAQQKRLARFSGRMRSTSGPRSQ  
 EMKSVPCPLSGNEVVNMAITPEELIARIMDAEPPEIYLMKDMKKPFTEANVMMSLTNLADKELVHMISWA  
 KKVPGFVELSLFDQVHLLCECWLEVLMLGLMWRVSNHPGKLIFSPDLSLSRDEGSCVQGFVEIFDMLLAA  
 TSRFRELKLQREEYVCLKAMILLNSNMCLSSSEGGEELQRRSKLLCLLDSVTDALVWAIKSTGLSFQORS  
 TRLAHLLMLLSHIRHLSNKGMDHLHCKMKMKMVPLYDLLLLLEMLDAHIMHGSRLSHSGPAPKESTGVQEAT  
 LSVLKNL

>ESR1\_MESAU

MTMTLHTKASGMALLHQIQGNELEPLSRPQLKMPLELALSEVYVDSSKPFAMFNYPEGAAYEFNAATAPAP  
 VYGQTGIAYGSGSEATAFGSNSLGLFPQLNSVSPSPLMLLHPPPPQLSPFLPHPGQVPYYLENEPSAYA  
 VRDSGPPAFYRSNSDNRRQSGRELRSSSSEKGSMAVESKTRYCAVCNDYASGYHYGVWSCEGCKAFFK  
 RSIQGHNDYMC PATNQCTIDKNRRKSCQACRLRKCIEVGMKGGIRKDRRGGRMLKHKRQRDDLEGRNDM  
 GPSGDMRATNLWSPPLVIKHTKKNPALSLTADQMVSAALLDAEPPVLYSEYDPSRPFSEASMMGLLTNLA  
 DRELVHMINWAKRVPGFVDLNLHDQVHLLCEAWLEILMIGLIWRSMEHPGKLLFAPNLLLDRNQGKCV  
 MVEIFDMLLAT SARFRMDLQGEFVCLKSI ILLNSGVYTFLSSTLKSLEEKDHIHRVLDKITDTLIHLM  
 AKAGLTLQQRRLAQLLLILSHIRHMSNKGMEHLYNMKCKNVVPLYDLLLLLEMLDAHRLHPTVSRMGVSP  
 EEPSQSQLTTTNTSSSHLQTYIIPSEAESFPNTI



>Q8UWB0\_CAICR

MTMTLHKTSGVTLLHQIQGTELETLSRPQLKIPLDRSLSEMYVENNKTGIFNYPEGTTYDFATAAPVYS  
 STSLSYAPTSESYGSSSLGGFHSLNVPSPVFLQTPQLSPFVHHHSQQVPYYLENDQSGFGMREAAS  
 STFYRPSADSRHQSGRERMSSTSEKASLSMESTKETRYCAVCNDYASGYHYGVWSCEGCKAFFKRSIQGH  
 NDYMCPATNQCTIDKNRRKSCQACRLRKCIEVGMKGGIRKDRRGGRMLKQKRQREEQDARNGETATAEM  
 RTPTLWTSPLVIKHTKKNPALSALTAEQMVSALEAEPPIVYSEYDPNRPFNEASMMTLLTNLADRELVH  
 MINWAKRVPGFVDLTLHDQVHLLCAWLEILMIGLVWRSMEHPGKLLFAPNLLLDRNQKQKVEGMVEIFD  
 MLLATAARFRMMNLQGEFVCLKSIILLNSGVYTFLSSTLKSLEEKDYIHRVLDKITDTLIHLMASGLS  
 LQQQHRRLAQLLLILSHIRHMSNKGMEHLYNMCKKNVPLYDLLEMLDAHRLHAPAARNAQVEEETRL  
 TTASASSHSLQSFYINNREDENLQNTI

>Q6W5G7\_XENLA

MTMPLPNKTTGVTFLHQIQSSELETLTRPPLKISLERPLGEMVENNRTGIFNYPEGTTYDFAAAAAPVY  
 SSASLSYAASSETFGSSSLTGLHTLNNVPPSPVFLQTPQLSPFIHHHGQQVPYYLESEQGTFAVREAAP  
 PTFYRSSSDNRRQSGRERMSANDKGPSPMESTKETRYCAVCSYASGYHYGVWSCEGCKAFFKRSIQGH  
 NDYMCPATNQCTIDKNRRKSCQACRLRKCIEVGMKGGIRKDRRGGRMLKHKRQKEEQEQKNDVDPSEIR  
 TASIWVNPSVKSMKLSPLVSLTAEQLISALMEAEPPIVYSEHDSKPLSEASMMTLLTNLADKELVHMIN  
 WAKRVPGFVDLTLHDQVHLLCAWLEILMVGLIWRVSEHPGKLSFAPNLLLDRNQGRCEGLVEIFDMLV  
 TTATRFRMMRLRGEFICLKSIILLNSGVYTFLSSTLESLEDTDLIHIILDKIIDTLVHFMASGLSLQO  
 QQRRLAQLLLILSHIRHMSNKGMEHLYSMCKKNVPLYDLLEMLDAHRIHTPKDKTTTQEEDSRSPPTT  
 TVNGASPCLOPYYTNTTEEVSLQSTV

>ESR1\_POEGU

MTLHKTSGVTLLHQIQGTELETLSRPQLKIPLERSLSDMYVETNKTGVFNYPEGATYDFGTAPVYSST  
 TLSYAPTSESEFGSSSLAGFHSLSNVPPSPVFLQTPHWSPFIIHHHSQQVPYYLENDQSGFGMREAAPPA  
 FYRPNSDNRRHSIRERMSSANEKGSLSMESTKETRYCAVCNDYASGYHYGVWSCEGCKAFFKRSIQGHND  
 YMCPATNQCTIDKNRRKSCQACRLRKCIEVGMKGGIRKDRRGGRVMKQKRQREEQDSRNGEASSTELRA  
 PTLWASPLVVKHNKKNPALSALTAEQMVSALEAEPLVYSEYDPNRPFNEASMMTLLTNLADRELVHMI  
 NWAKRVPGFVDLTLHDQVHLLCAWLEILMIGLVWRSMEHPGKLLFAPNLLLDRNQKQKVEGMVEIFDML  
 LATAARFRMMNLQGEFVCLKSIILLNSGVYTFLSSTLKSLEEKDYIHRVLDKITDTLIHLMASGLSLQ  
 QQHRRLAQLLLILSHIRHMSNKGMEHLYNMCKKNVPLYDLLEMLDAHRLHAPAARSAPMEEENRSQL  
 TTASASSHSLQSFYINSKEEENMQNTL

>Q90WS8\_BRARE

MSEYPEGDSPLLQIQEVDSGRVGGHILSPIFNSSPSLPVENHPICIPSPYTDLGHDFSTLPFYSPALLG  
 YSTSPLSDCSSVRQLSPTLFWPPHSHVSSLTQQQSRLQQNHATSGTWTEHTPHDHVEEENSKPLVKRV  
 ADTEETSVALRGGKADMHYCAVCSYASGYHYGVWSCEGCKAFFKRSIQGHNDYICPATNQCTIDKNRRKS  
 CQACRLRKCIEVGMKGLRRDRSSYQQRGAQQKRLVRFSGRMRMTGPRSQEIKSIPRPLSGNEVVRI  
 SPEELISRIMEAEPEIYLMKDMKPFTEANVMMSLTNLADKELVHMISWAKKIPGFVELSLFDQVHLL  
 CCWLEVLMLGLMWRVSVNHPGKLIFSPDLSLSRDESSCVGLVEIFDMLLAATSRFRELKQREEYVCLKA  
 MILLNSNMCLGSSEGEDLQSRSKLLCLLDSVTDALVWAIKSTGLSFQQRSTRLAHLMLLSHIRHVS  
 NKGMEHLYNMCKKNVPLYDLLEMLDAHIMHSSRLSHSGPRAPAAHKDNKSVQEAFFPCSSQHGP

>ESR1\_XENLA

MTMPLPNKTTGVTFLHQIQSSELETLTRPPLKISLERPLGEMYVENNRTGIFNYPEGTTYDFAAAAAPVY  
 SSASLSYAASSETFGSSSLTGLHTLNNVPPSPVFLAKLPQLSPFIHHHGQQVPYYLESEQGTFAVREAA  
 PPTFYRSSSDNRRQSGRERMSSANDKGPPSMESTKETRYCAVCSDYASGYHYGVWSCEGCKAFFKRSIQG  
 HNDYMCPATNQCTIDKNRRKSCQACRLRKCYEVGMMKGGIRKDRRGGRLLKHKRQKEEQEKNDVDPSEI  
 RTASIWVNPSVKSMKLSPVLSLTAEQLISALMEAEAPIVYSEHDSTKPLSEASMMTLLTNLADRELVHMI  
 NWAKRVPGFVDLTLHDQVHLLLECAWLEILMVGLIWRVVEHPGKLSFAPNLLLDRNQGRCEGLVEIFDML  
 VTTATRFRMMRLRGEEFICLKSIILLNSGVYTFLSSTLESLEDTDLIHIILDKIIDTLVHFMAKSGLSLQ  
 QQORRLAQLLLILSHIRHMSNKGMEHLYSMKCKNVVPLYDLLEMLDAHRIHTPKDKTTTQEEDSRSPPT  
 TTVNGASPCLQPYTNTTEEVSLQSTV

>ESRB1\_CARAU

MTALNSYAFAMSEYAEGDSSLLQLQEVDSSRMGGHVLSPTFNSSSPSLPVESHPIICIPSPYTDLGHDFTT  
 LPFYSPSLLGYGTSPLSDCPSVRQSLSPTLFWPPHSHVSSALAHQQQTRLQPNHPTGGTWAELTPHDHGE  
 EENCKPLSKRVAVAEETSTSLRGKADMHYCAVCSDYASGYHYGVWSCEGCKAFFKRSIQGHNDYICPATN  
 QCTIDKNRRKSCQACRLRKCYEVGMMKCGLRDRSSYQQRGAQQNRLTRFSGRMRTSGPRSQEIKTVQRP  
 LSGNKVVTMALSPEELIARIMDAEPPEIYLMKDVKKPFTEANVMMSLTNLADKELVHMISWAKKIPGFVE  
 IGLFDQVHLLLECCWLEVLMLGLMWRVSNHPGKLVFSPDLSLSRDEGSCVQGFAEIFDMLLAATSRFRELK  
 LQREEYACLKAMILNNSMCLSSAEGGEELQSRSKLLCLLDSVTDALVWAIKSTGLSFQQRSTRLAHLLM  
 LLSHIRHVSNGMDHLHSMKMKMMPPLYDLLEMLDAHIMHGSRLSHSGPQADPVPKESNCVQETFTCTS  
 QHGGTLRP

>Q7ZU32\_BRARE

MSEYPEGDSPLLQLQEVDSDGRVGGHILSPIFNSSSPSLPVENHPICIPSPYTDLGHDFSTLPFYSPALLG  
 YSTSPLSDCSSLVSRQSLSPTLFWPPHSHVSSLTQQQSRQQNHATSGTWTEHTPHDHVEEENSPLVKRV  
 ADTEETSLSLRGKADMHYCAVCSDYASGYHYGVWSCEGCKAFFKRSIQGHNDYICPATNQCTIDKNRRKS  
 CQACRLRKCYEVGMMKCGLRDRSSYQQRGAQQKRLVRFSGRMRTGPRSQEIKSIPRPLSGNEVVRI  
 SPEELISRIMEAEPPEIYLMKDMKKPFTEANVMMSLTNLADKELVHMISWAKKIPGFVLSLFDQVHLL  
 CCWLEVLMLGLMWRVSNHPGKLIFSPDLCLSRDESSCVQGLVEIFDMLLAATSRFRELKQREEYVCLKA  
 MILLNSMCLGSSEGGEDLQSRSKLLCLLDSVTDALVWAIKSTGLSFQQRSTRLAHLLMLLSHIRHVS  
 NKGMDDLHCKMKMMPPLYDLLEMLDAHIMHSSRLSHSGPRAPAAHKDNKSVQEAFCSSQHGP

>Q8AV62\_BRARE

MSEYPEGDSPLLQLQEVDSDGRVGGHILSPIFNSSSPSLPVENHPICIPSPYTDLGHDFSTLPFYSPALLG  
 YSTSPLSDCSSLVSRQSLSPTLFWPPHSHVSSLTQQQSRQQNHATSGTWTEHTPHDHVEEENSPLVKPV  
 AETEETSLSLRGKADMHYCAVCSDYASGYHYGVWSCEGCKAFFKRSIQGHNDYICPATNQCTIDKNRRKS  
 CQACRLRKCYEVGMMKCGLRDRSSYQQRGAQQKRLVRFSGRMRTGPRSQEIKSIPRPLSGNEGARI  
 SPEELISRIMEAEPPEIYLMKDMKKPFTEANVMMSLTNLADKELVHMISWAKKIPGFVLSLFDQVHLL  
 CCWLEVLMLGLMWRVSNHPGKLIFSPDLCLSRDESSCVQGLVEIFDMLLAATSRFRELKQREEYVCLKA  
 MILLNSMCLGSSEGGEDLQSRSKLLCLLDSVTDALVWAIKSTGLSFQQRSTRLAHLLMLLSHIRHVS  
 NKGMDDLHCKMKMMPPLYDLLEMLDAHIMHSSRLSHSGPRAPAAHKDNKSVQEAFCSSQHGP

>Q60GT9\_GAMAF

MAFRSRLPDRDETANSLRMTERDRMETIDAYACPTLELSRAVSVSLGLDPLSSPLGGLNQCPSAFIGDCE

PAAAGNSSCGAPELGTPGSASSEGSRLARADSSLVDEFGEVCHGLRQVSCVDQFSSGDMGAQSVTRG  
SVISRVCCKDSSMFMNSIAEVPTTPQVTEVGSCLKPYSYSAEANLYRETQGVWCATERAYGERSEPHRSA  
YDGHSLFKCYCGQTSFGPRQECDCVWYRRGERGGKGGAPVSTVQAFGQVESYDAIPQGGQSAFSTIKTEP  
SVVWHCTDRGFRHEDFFPGVFLSDRRVCQVCGDDASGCHYGAVTGCGSCKVFFKRAAAGKQNHLCASRNDC  
TIDKLRRKNCASCRLKRCFMSGMSLKGRRLLKGAGQTRGEEEEQQPGAWGHGEREGKHNVVLEPGNAAARA  
QGPQLLGIPTMRSCLSLLTILQSIIEPAVVNAGHDPAQPDPSPASLLTSLNELGERQLVTVVRWAKAIPGF  
RDLHVDDQMSVIQLSWMGVMVFALGWRSYTLTNCMSLYFAPDLVFNDRMQVSSMYEHCVRMKLLAQRFC  
KLEVTSEEFCLMKALVLFSSIMPVEGLRSQRCFDELRTSYIKELDRLASHHGETTRTQRLFQLTQLLDYLO  
SVVRKLHQFTYDLFIQAQSLQMRVNFPEMISEIVSVHVPKILSGMVKPILFHNTA

>Q8UWA9\_CNEUN

MTMTLHTKTSGVALLHQIQGSELEPLNRPQLKIPLERPISEMYVDSNKTGVFNYPEGATYDFSTAAPVYS  
SASLSYASTNESFGSGNLGGLHSLNVPSPVFLQVAPQLSPFIHHHNQVVPYYLENEPSSSAMREAFP  
TAFYRPGSENRRHGGGRASNSEKGSLSMESTKETRYCAVCNDYASGYHYGVWSCEGCKAFFKRSIQGHNDY  
MCPATNQCTIDKNRRKSCQACRLRKCYEVMGMMKGGIRKDRRGGRMLKHKRQRDELDRGNAVAVTEARNTT  
LWPSPLMIKHSKKNSPALSLTAEQMVSAALLDAEPPIVYSEYDPSSPFSEASVMTLLTNLADRELVHMITW  
AKRVPGFVDLALHDQVHLLCAWLEILMIGLIWRSLEHPGKLLFAPNLLDRSQGMCVEGFVEIFDMLLA  
TSSRFMMNIQGEFVCLKSIILLNSGIYTFLSSTLRSLEEKEHIHRVLDKITDTLTHLMAKSGLSLQQQ  
HRRLAQLLLMLSHIRHMSNKGMEHLYNMCKKNVPLYDLLEMLDAHRLHERRTPTSEQAMNQLTNASTS  
VHSLPPCYVVKREEENEQEAV

>ESR2\_STUVU

MSLCTSSHKDFSQLLPLQDIGCNKTEIKNSPAGVISAPYSCNQSTLTAEHSPVYIPSSYME SRHEYSTM  
AFCSPAMVNYNIASNFGDPEAVAARQTSSPGALWSAPGHLSPLSLHCQSSLLYAEQPKSLWCEARPMEPV  
LPGSRETLKRKTNGNDCTSPIANNPGSKDAHFCAVCSYASGYHYGVWSCEGCKAFFKRSIQGHNDYIC  
PATNQCTIDKNRRKSCQACRLRKCYEVMGMMKCGSRRERCGYRILRSHRGAEERVHCLGRARRYSEAATRV  
KEILLSTVSPEQFVLTLLLEAEPPHVLVSRPSKPFTEASMMMSLTKLADKELVHMIGWAKKIPGFIDLSLY  
DQVRLLESCWMEVLMIGLMWRSIDHPGKLI FAPDLVLDREDEGKVEGILEIFDMLLAMTSRFRELKLQHK  
EYLCVKAMILNNSMFPLSAEPEPESNRKLHLLNVVTEALVWVIAKSGIPSQQTTRLANLLMLLSHVRH  
ASNKGMEHLLSMKCKNVVPVYDLLEMLNAHTLRGQRKPLATHPEFGPLEQMEPGESLRKGEPQ

>ESR2\_MOUSE

MEIKNSPSSLTSPASYNCSQSILPLEHGPIYIPSSYVESRHEYSAMTFYSPAVMNYSVPSSTGNLEGGPV  
RQTASPNVLWPTSGHLSPLATHCQSSLLYAEQKSPWCEARSLEHTLPVNRETLKRKLGSGCASPVTSF  
SAKRDAHFCVCSYASGYHYGVWSCEGCKAFFKRSIQGHNDYICPATNQCTIDKNRRKSCQACRLRKCY  
EVMGVMKCGSRRERCGYRIVRRQRSASEQVHCLNKAKRTSGHTPRVKELLLNSLSPEQLVLTLLLEAEPPNV  
LVSRPSMPFTEASMMMSLTKLADKELVHMIGWAKKIPGFVELSLLDQVRLLESCWMEVLMVGLMWRSIDH  
PGKLI FAPDLVLDREDEGKVEGILEIFGMLLATTARFRELKLQHKKEYLCVKAMILNNSMYPLATASQEA  
ESSRKLTHLLNAVTDALVWVISKSGISSQQQSVRLANLLMLLSHVRHISNKGMEHLLSMKCKNVVPVYDL  
LLEMLNAHTLRGYKSSISGSECCSTEDSKSKEGSQNLQSQ

>ESR2\_RAT

MEIKNSPSSLSSPASYNCSQSILPLEHGPIYIPSSYVDRHEYSAMTFYSPAVMNYSVPGSTSNLDGGPV  
RLSTSPNVLWPTSGHLSPLATHCQSSLLYAEQKSPWCEARSLEHTLPVNRETLKRKLSGSSCASPVTSF

NAKRDAHFCVCSYASGYHYGVWSCEGCKAFFKRSIQGHNDYICPATNQCTIDKNRRKSCQACRLRKY  
 EVGMVKCGSRRERCYRIVRRQRSSEQVHCLSKAKRNGGHAPRVKELLLSTLSPEQLVLTLLAEAPPNV  
 LVSRPSPMPTFEASMMSLTKLADKELVHMIGWAKKIPGFVELSLDQVRLLESCWMEVLMVGLMWRSIDH  
 PGKLI FAPDLVDRDEGKVEGILEIFDMLLATTSRFRELKLOHKEYLCVKAMILLNSSMYPLASANQEA  
 ESSRKLTHLLNAVTDALVWVIAKSGISSQQQSVRLANLLMLLSHVRHISNKGMEHLLSMKCKNVVPVYDL  
 LLEMLNAHTLRGYKSSISGSECSSTEDSKNKESSQNLQSQ

>Q8JJB9\_CYPCA

MSVYPEGDSPLLQIQEVDSSRVGGHVLSPAFNSSSPSLPVESHPIICIPSPYTDLSHDFTTLPFYSPALLG  
 YGAAPLSDCPSVRQSLSPSLFWPPHNHVSSVVLHQQQTRLQONHPTGGSWAELTPHDHSEENCKPLAKR  
 VADAEETSASLRGKADMHYCAVCSYASGYHYGVWSCEGCKAFFKRSIQGHNDYICPATNQCTIDKNRRK  
 SCQACRLRKYEVGMMKGLRRDRGSYQQRGARQKRLARFSGRMRTCGPRSQEIKSVPRPLGGNKVVSIA  
 LSPEELIARIMDAEPPEIYLMNDVKKPFTEANIMMSLTNLADKELVHMISWAKKIPGFVELSLFDQVHLL  
 ECCWLEVLMLGLMWRVSNHPGKLIFSPDLSLRDEGSCVQGFVEIFDMLLAATSRFRELKLOREYYACLK  
 AMILLNSNMCLSSAEGGEELQSRKLLCLLDSVTDALVWVAISKTGSLFQQRSTRLAHLLMLLSHIRHVS  
 NKGMDHLHCMKMKMPLYDLLEMLDAHIMSSRLSHSGPRAAPAPKESKGVQREALTRTSQSGGTLAGP

>ESR2\_HUMAN

MDIKNSPSSLNSPSSYNCSQSILPLEHGSIIYIPSSYVDSHHEYPAMTFYSPAVMNYSIPSNVTNLEGGPG  
 RQTTSPNVLWPTPGHLSPLVVHRQLSHLYAEPQKSPWCEARSLEHTLPVNRETLKRKVSNGRCASPVTPG  
 GSKRDAHFCVCSYASGYHYGVWSCEGCKAFFKRSIQGHNDYICPATNQCTIDKNRRKSCQACRLRKY  
 EVGMVKCGSRRERCYRLVRRQRSADQLHCAGKAKRSGGHAPRVRELLLDALSPEQLVLTLLAEAPPVH  
 LISRPSAPFTEASMMSLTKLADKELVHMISWAKKIPGFVELSLFDQVRLLESCWMEVLMGLMWRSIDH  
 PGKLI FAPDLVDRDEGKVEGILEIFDMLLATTSRFRELKLOHKEYLCVKAMILLNSSMYPLVTATQDA  
 DSSRKLHLLNAVTDALVWVIAKSGISSQQQSMRLANLLMLLSHVRHASNKGMEHLLNMKCKNVVPVYDL  
 LLEMLNAHVLRGCKSSITGSECSPAEDSKSKEGSQNPQSQ

>ESR1\_ONCMY

MLVRQSHTQISKPLGAPLRSRTTLESHVISPPKLSPPQPTTPNSNMYPEETRGGGGAAAFNYLDGGYDYT  
 APAQGAPPLYSTTPQDAHGPPSDGSMQSLGSSPTGPLVVFVSSSPQLSPQLSPFLHPPSHHGLPSQSYL  
 ETSSTPLYRSSVVTNQLSASEEKLCIASDRQOSYSAAGSVRVFEMANETRYCAVCSDFASGYHYGVWSC  
 EGCKAFFKRSIQGHNDYICPATNQCTMDRNRKSCQACRLRKYEVGMVKGGLRKDRGGRVLRKDKRYCG  
 PAGDREKPYGDLEHRTAPPQDGGRRNSSSSLNNGGGWRGPRITMPPEQVLFLLQGAEPALCSRQKVARPY  
 TEVTMMTLLTSMADKELVHMIWAKKVPGFQELSLHDQVQLLESSWLEVLMIGLIWRSIHCPGKLIFAQD  
 LILDRSEGDCEGMAEIFDMLLATVSRFRMLKLPKEEFVCLKAIILLNSGAFSFCNSVESLHNS SAVES  
 MLDNITDALIHHSISGASVQQQPRRQAQLLLLLSHIRHMSNKGMEHLYSIKCKNKVPLYDLLEMLDGH  
 RLQSPGKVAQAGEQTEGPSTTTTTSTGSSIGPMRGSQDTHIRSPGSGVLQYGSPPSSDQMPIP

>Q8UWB8\_ORENI

MSFHSFLEETNSLTMNEGDRDLDTTTYACPAYELSKAVSVSLGLDSVSSPPNNMNQSSSAFAECDSGTVA  
 DSSRGVPELRRAGNMNSDGSMFVLGDSSLEDDFGEVCQGIQQVSCMDLFGSGEMDSAQTVTRGSVISRY  
 VCRESNVFMNPTPELPAPPQVPGVVPLKPPSSYCASDLYRDLPEMWCANERAYSDRSQPQPQRGESGE  
 HNFLCKYCNCGQAPRGNRQECRCIWIYGRGDQGGKGMRRATAQGYGQMSSYPSAIPQGQNTFSTIKSGPSV  
 WMNCTDRSLRREDFFPVYLSERRVCQVCGDGASGCHYGAVTCGSCKVFVKRAAAGKQNHLCASRNDCTI

DKLRRKNCASCRLKRCFMSGMSLKGRRLKGAGQARNGEEEQQPASWGQGEKEERAACKDVVLESNAGVR  
 AQAASQALGAAIPPLHSCLSLLSILQAIEPAVNVAGHDPAQPDSPMSLLTSLNKLGERQLVTVVRWAK  
 AIPGFRDLHVDDQMSVIQLSWMGMVVFALGWRSYTLTNSSMYFAPDLIFNDQRMQASSMYEHCVRMKLL  
 SQRLCMLKVTQEEFLCMKALVLLSIMPEQGPKSQHCFDKLRTSYIKELDRLASHRGETTRTQRLFQLTQL  
 LDHLQSVVRKLHQFTYDLFIQAQSMHVSFPEMISEIVSIHVPKILSGMVKPILFHNVA

>Q98SM7\_BRARE

MSEYPEGDSPLLQLQEVDSEGRVGGHILSPIFNSSPSLPVENHPICIPSPYTDLGTTSALCPFTVPLCWG  
 TSTSPLSDCSSVRQSLSPTLFWPPHSHVSSLTLOQQSRLQQNHATSGTWTEHTPHDHVEEENSKPLVKRV  
 ADTEETSVSRLRGKADMHYCAVCSYASGYHYGVWSCEGCKAFFKRSIQGHNDYICPATNQCTIDKNRRKS  
 CQACRLRKCYEVGMMKCGLRDRSSYQQRGAQQKRLVRFSGRMRMTGPRSQEIKSIPRPLSGNEVVRI  
 SPEELISRIMEAEPPEIYLMKDMKKPFTEANVMMSLTNLADKELVHMISWAKKIPGFVELSLFDQVHLL  
 CCWLEVLMLGMLMWRVSVNHGKLIIFSPDLCLSRDESSCVQLVEIFDMLLAATSRFRELKLRQEEYVCLKA  
 MILLNSMCLGSSEGGEDLQSRKLLCVLDSVTDALVWAIKSTGLSFQQRSTRLAHLLMLLSHIRHVSNK  
 GMDHQHCMKMKMVPVLYDLLLEMLDAHIMHSSRLSHSGPRAPAAHKDDKSVQEAFFCSSQHGP

>ESR2\_BOVIN

MDVKNSPSSLNPSVSYNCGQSILPLEPGPIYLPSSYVESRHEYSAVTFYSPAVMNYSIPNNSDGPGRQT  
 TSPNVLWPTPGHLSPLAIHCQPSVLYAEPQKSPWRETRSLEHTLPVNRETLKRKASGSSCASPATSPSSK  
 RDAHFCAVCSYASGYHYGVWSCEGCKAFFKRSIQGHNDYICPATNQCTIDKNRRKSCQACRLRKCYEVG  
 MVKCGSRRERCYRIVRRQRNSDEQLHCLSKTRNGGPMTRVKELLSALSPEQLVLTLLLEAEPHVLIS  
 RPSTPFTEASMMMSLTKLADKELVHMISWAKKIPGFVELSLYDQVRLLESCWLEVLVGLMWRVIDHPGK  
 LIFAPDLILDRDEGKVEGILEIFDMLLATTSRFRELKLRQKEYLCVKAMILNNSMYPATAPQEAADSG  
 RKLTHLLNAVTDALVWVIAKSGMSSQQQSMRLANLLMLLSHVRHASNKGMEHLLNMKCKNVVVPVYDILLE  
 MLNAHTLRGNKSLVTGSENLVEDSESKEGSQKPQAQ

>Q5PR29\_BRARE

MSSSPGPAPVLDSSKADRGA SPALLPRLYASPLGMDNQTVCIIPSPYVEACQDYSPPHGGEFNHGALTYLS  
 PVSSAVLGFHRPPVSESLVPLSPTILWPPHSLHYPPPLAYSETRSHSAWEEAKHTLSQSSSVLSHTKLL  
 GQOLEGDNGLNPSASIVGKGDTHFCVACHDYASGYHYGVWSCEGCKAFFKRSIQGHNDYICPATNQCTID  
 KSRRKSCQACRLRKCYEVGMMKCGVRRERCSYRGARHRRNPQIRDSSGGVVGLRGQSQQHLEFPSPSQH  
 LFPSGGRAEGRGLNYSPEQLVSCILEAEPPIYLREPVKKPYTEASMMMSLTSLADKELVLMISWAKKIP  
 GFVELTSLDQVHLLLECCWLDILMLGMLMWRVSDHPGKLIIFTPDLKLNREEGNCVEGIMEIFDMLLATTSRF  
 RELKLRQEEYVCLKAMILNNSNCSLPTPEDVESRGKVLNLLDSVTDALVWIIISRTGLSSQQQSIRLA  
 HLLMLLSHIRHLSNKGIEHLSNMKRKNVLLYDLLLEMLDANTSQSSRMLEDROQSPENLHTRSFPDLK  
 DSDQETPHSPRAEETVNKTLHSSLLREDMDTN

>Q6XSH2\_MICSA

MASSPGLDADPLPLLQLQEVDSSKASQRPSSPGLLPAVYSPPLGMSHTVCIIPSPYTDSSHEYNHSHGPL  
 TFYSPSVLSYARPPITDPSSSLCPPLSPSAFWPSHSHPNMPSLTLRCPQPLVYNEPSPHAHWPEPKAHSI  
 NPSSSILGCNKPLGKRLLEEGVEGVNSSLCSAVGKADMHFCAVACHDYASGYHYGVWSCEGCKAFFKRSIQ  
 GHNDYICPATNQCTIDKNRRKSCQACRLRKCYEVGMMKCGVRRERCSYRGARHRRGGLQPRDPTGRGLVR  
 MGLGSRAQRHLHLEAPLAPLTSLPQANHVHPSAMSPPEEISRIMEAEPPEIYLMEDMCKPFTEASMMMSL  
 TNLADKELVLMISWAKKIPGFVDLSLADQIHLLKCCWLEILMLGMLMWRVSDYPGKLIIFSPDFKLNREEGQ

CVEGFMEIFDMLLAATSRFRELKLRQEEYVCLKAMILLNSNLCTSSPQTAEELSRNKLLRLLDSDVIDAL  
 VWAISKGLSTQQQTLRLGHLTMLLSHIRHVSNGMDHLSTMKRKNVVLVYDILLEMLDANTSSSGSQPS  
 SSPSSDTYSDQHQPQPPSHLQPDSDQTGADHTTVPPEPAEAPILDGHLQTLTLHSSPPFQSLVVAHID  
 SNDYIHQEQWSLDTADAGPPVEPTDYIVSDRVVMETALLG

>ESR2\_PIG

MDIKNSPNSLNSPVSYNCSQSVLPLEPGPIYIPSSYVESCHEYSAMTFYSPAVVNYSISSNSEVGPGRQA  
 TSPNVLWPTPGHLSPLAIHCQPSLLYAEPQKSPWCDFRSLHETLPVNRETLKRKASGSSCASPVTSPPSSK  
 RDAHFCVCSYASGYHYGVWSCEGCKAFFKRSIQGHNDYICPATNQCTIDKNRRKSCQACRLRKCYEVB  
 MVKCGSRRRRCGYRIVRKQRNSEGHLHCLSLRAKNGDHTTRVKELLLSTLSPEQLVLTLLLEAEPHVLVS  
 RPSTPFTEASMMMSLTKLADKELVHMISWAKKIPGFMELSLYDQVRLLESCWLEVLVGLMWRSIDHPGK  
 LIFAPDLVDRDEGKCEGILEIFDMLLATTSRFRELKLRQKEYLQCVKAMILLNSMYPSAAAQEAESSR  
 KLTHLLNAVTDALVWVIARSGISSQQQSVRLANLLMLLSHVRHASNKGTEHLLNMKCKNVVVPYDILLEM  
 LNAHTLRGNKSLVTGSESRMEESKEGSQKPQAQ

>ESR2\_SHEEP

MDVKNSPSSLNSPVSYNCGQSILPLEPGPIYLPSSYVESRHEYSAVTFYSPAVMNYSIPNNSDGPGRQT  
 TSPNVLWPTPGHLSPLAIHCQSSLLYAEPQKSPWCETFRSLHETFPVNRETLKRKASGSSCASPVSSPPSSK  
 RDAHFCVCSYASGYHYGVWSCEGCKAFFKRSIQGHNDYICPATNQCTIDKNRRKSCQACRLRKCYEVB  
 MVKCGSRRRRCGYRIVRRQRNSDEQLHCLSKTKRNGAPMTRVKELLLSALSPEQLVLTLLLEAEPHVLMS  
 RPSAPFTEASMMMSLTKLADKELVHMISWAKKIPGFVELSLYDQVRLLESCWLEVLVGLMWRSIDHPGK  
 LIFAPDLVDRDEGKCEGILEIFDMLLATTSRFRELKLRQKEYLQCVKAMILLNSMYPSATASQEAESG  
 RKLTHLLNAVTDALVWVIAKSGMSSQQQSMRLANLLMLLSHVRHASNKGMEHLLNMKCKNVVVPYDILLE  
 MLNAHTLRSNKPLVTRSERNLAEDSESKESQKPQAQ

>Q8QHK9\_PAROL

MAAASAEDKQPLLQLQEVDSRVRSCVLSPISTSSPGLSLDGSQPICIPSPYTELGHDFAITIPFYGPTI  
 FSYAAPSIDPCPSVHQSLSPSLFWPSHGMMGPPMTLHRSQGRSQGQPIQSPWGELETPRDGLANSKGV  
 RRSQESDGVVSSGGKSDLHYCAVCHDYASGYHYGVWSCEGCKAFFKRSIQGHNDYICPATNQCTIDKNR  
 RKSCQACRLRKCYEVBGMTKCGMRKDHGSYRNPKTRRLTRLSQGRASGPKALTGPVVALMNELQPPALTP  
 EQLIERIMEAEPPIYILMKDMSGPLTEANVMMSLTHLADKELVHMITWAKKIPGFVELGLLDQVHLLLEC  
 WLEVLMMGLMWRSVDHPGKLIFFPDLSSLREEGSCVQGFSEIFDMLIAATSRVRELKLRQEEYVCLKAMI  
 LLNSNMCLSSSEGSEELHSRKLKLLLDVTDALVWVIAKTGLTFRQQYTRLAHLLMLLSHIRHVSNGKM  
 DHLHCKMKMNMVPLYDILLEMLDAHIMHSSRLPHASQPPEFTDQGEVPARPGSSGNGSSNTWTPSTSGD  
 GGEPQ

>Q98SM8\_BRARE

MSSSPGPAPVLDSSKADRGA SPALLPRLYASPLGMDNQTVCIIPSPYVEACQDYSPPHGGEFNHGALTYL  
 PVSSAVLGFHRPPVSESLVPLSPTILWPPHSLHCPPPLAYSETRSHSAWEEAKHTLSQSSSVLSHTKLL  
 GQOLEGDNGLNPSASIVGKGDTHFCVCHDYASGYHYGVWSCEGCKAFFKRSIQGHNDYICPATNQCTID  
 KSRKSCQACRLRKCYEVBMMKCGVRRRRCYSYRGARHRNPQIRDSSGGVVGLRGQSQQHLEFPLSPSQH  
 LFPSGGRAEGRGLNYSPEQLVSCILEAEPPIYILREPVKKPYTEASMMMSLTLADKELVLMISWAKKIP  
 GFVELTSLDQVHLLLECWLIDILMLGLMWRSVDHPGKLIFFPDLKLNREEGNCVEGIMEIFDMLLATTSRF  
 RELKLRQEEYVCLKAMILLNSNNCSSLPQTPEDVESRGKVLNLLDSVTDALVWIIISRTGLSSQQQSIRLA



HLLMLLSHIRHLSNKGIEHLSNMKRKNVLLYDILLEMLDANTSQSSRMLEDROQSPENLHTSRPQDLK  
DSDQETPHSPRAEETLNKTLHSSLLREDMDTN

>ESR2\_ANGJA

MAGSPGNELPLLQLQEVDSSKVGESGGSSGLLPTMYNGALPALSMESHAVCIPSPYTDSSHDYAALTFYS  
PPILSHGGPAVPESPAARQSLSPSLFWPAHGHHGHVSPALALHFQQPLVYREPAHSPWAEPKPLEHGQAQT  
SKLAGKRMAESEEGTSSVGGCFAGKGMHFCVCHDYASGYHYGVWSCEGCKAFFKRSIQGHNGYICPAT  
NQCTIDKNRRKSCQACRLRKCYEVGMMKCGVRRERCTYRGARHRRMPHIRELAGTGGGARTQRRGEGVVP  
QTQEAQSSALTPEQLINRIIEAEPPEIYLMKELKKPFTEDSMMSLTNLADKELVLMISWAKKIPGFVEL  
DLSDQVHLLLECCWLEVLMLGLMWRSDVHPGKLIFSPDLKLNREDEGSCVEGILEIFDMVLAATSRFRELKL  
QREEYVCLKAII LLNPNLCTTSENREELESRNKLLHMLDSVTDALVWTIAKKGLTFQQQSARLAHLLML  
LAHIRHLSNKGMEHLSNMKRKNVPLYDILLEMLDANTMHSSRMSASYSSQSPWSQAAQSQPFPSPCS  
GECPCPPKESSTI

>Q90WS9\_BRARE

MSSSPGPAPVLDSSKADRASGALLPRLYASPLGMDNQTVCI P SPYVEACQDYSPPHGGEFNHGALTYLS  
PVSSAVLGFHRPPVSESLVPLSPTILWPPHSLHCPPPLAYSETRSHSAWEEAKHTLSQSSSVLSHTKLL  
GQOLEGDNGLNPSASIVGKGDTHFCVCHDYASGYHYGVWSCEGCKAFFKRSIQGHNDYICPATNQCTID  
KSRRKSCQACRLRKCYEVGMMKCGVRRERCSYRGARHRRNPQIRDSSGGVVGLRGQSQQHLEFPLSPSQH  
LFPSSGRAEGRALNYSPEQLVSCILEAEPPIYLRFPVKKPYTEASMMMSLTSLADKELVLMISWAKKIP  
GFVELTSLDQVHLLLECCWLDI LMLGLMWRSDVHPGKLIFTPDLKLNREEGNCVEGIMEIFDMLLATTSRF  
RELKLQREEYVCLKAMILLNSNCSLPTPEDVESRGKVLNLLDSVTDALVWII SRTGLSSQQQSIRLA  
HLLMLLSHIRHLSNKGIEHLSNMKRKNVLLYDILLEMLDANASQSSRMLEDROQSPENLHTSRPQDLK  
DSDQETPHSPRAEEMVNKTLHSSLLREDMDTN

>ESR2\_CALJA

MDIKNSPSSLNPSYFNGQSILPLEHGPIYIPSSYVESHHEYPAMTFYSPAVMNYI P SSVTNLEEGPG  
RQITSPNMLWSTPGHLSPLAVHHQLSHLYAEPQKSPWCEARSLEHTLPVSRETLLKRVSGNHCASPVTGP  
SSKRDAHFCVCSDYASGYHYGVWSCEGCKAFFKRSIQGHNDYICPATNQCTIDKNRRKSCQACRLRKC  
YEVGMVKCGSRRERCYRLVRRQGNAAEQ LHCAGKAKRSGGHVPRVRELLLSALSPEQLVLTLLAEPPHV  
LISRPSVPFTEASMMMSLTKLADDEELVHMI SWAKKIPGFVELSLLDQVRLLESCWLEVLMLVGLMWRSDH  
PGKLIFAPNLILDRDEGKCVGILEVFDMLLATTSRFRELKLQHKEYLCVKAMVLLNSQYDPLVTATQDA  
ESSQKLAHLLNAVTDALVWVIAKSGFSSQQQSVRLANLLMLLSHIRHASNKGMEHLLSMKCKNVVPVYDL  
LLEMNAHVVRGCKSSITGSECSPAEDSKSTEGSQNPQSP

>ESR1\_PAGMA

MYPEDSRGSGGVATVDFLEGTYDYAAPT PAPTPLYSHSTPGYYSAPLDAHGPPSDGSLQSLGSGPNSPLV  
FVPSSPRLSPFMHPPHYLETTSTPVYRSSVPSSQQQSVSREDQCGTSDDSYVGESEGAGALAAGFEIAK  
EMRFCVCSDYASGYHYGVWSCEGCKAFFKRSIQGHNDYICPATNQCTIDRNRKSCQACRLRKCYEVG  
MKGGMKDRGRVLRDRKQRTGTSDRDKASKGLEHRTAPPQDRRKHISSSAGGGGGKSSMISMPDPQVLLL  
LQGAEPMLCSRQKLNRPYTEVTMMTLLTSMADKELVHMI AWAKKLPGLFLQSLHDQVQLLESSWLEVL  
M IGLIWRSIHCPGKLIFAQDLILDRSEGDCEGMAE I FDMLLATASRFRMLKLPKEEFVCLKAII LLNSGA  
FSFCTGTMEPLHDGAAVQNMLDTITDALIHINQSGCSAQQQSRRQAQLLLLLSHIRHMSNKGMEHLYSM  
KCKNKVPLYDILLEMLDAHRIHRADRPAETWSQADREPPFTSRNSSGGGGGGGGSSSAGSTSGPRVSHE

SPTSPGVLQYGGSRSECTHIL

>Q6H9M5\_SPAAU

MAASPGLDERSLLQLQEVDSSKPSERPSSPRQLPAAYSPPPLGMSHTVCI P SPYADSSHEYNHGHGPLNF  
 YSQSVLSYARQPVTDSPSYLCPSISPSAFWPSHNHPSMPSLTLQCPQPHVYNEPSPHAPWLEPKAHAVTT  
 SSAVISCNKLPGRKSDEREGEGANSSSCSSAVEKADMHFCAVCHDYASGYHYGVWSCEGCKAFFKRSIQGH  
 NDYICPATNQCTIDKNRRKSCQACRLRKCYEVGMMKCGVRRERC SYRGARHRRGGLQARDPTGRGLVVRVG  
 LGSRGQRHLHLEAPLTPLPQAKRVHHSAMSPEEFISRIMEAEPPEIYLMEDMNKPFTESSMMMSLTNLAD  
 KELVLMISWAKKIPGFVELSLADQIHLKCCWLEIILMLGLMWRSVDHPGKLIFSPDFKLNREEGQCVEGI  
 MEIFDMLLAATSRFRELKLRQREYVCLKAMILLNSYLC TNSPETAELESRNKLLRLLDSVIDALVWAIS  
 KLGLTTQQQTLRLGHLTMLLSHIRHVSNGMDHLSTMKRKNVVLVYD L LLEMLDANTTTSGSQASSPTS  
 ETFPDQHQPAPSHLQPGSDQAAADHTAVPPRGPAEAPILDGHLQALTLOSSPHFQSLEMT H MDSNQYI  
 HPEQWSLETRDAALSVDGSVDYMSPDPSVMDTDLVNGL

>Q804Q6\_ACASC

MYPEDSRVSGGVATVDFLEGTYDYAAPTPAPTPLYSHSTPGYYSAPLDAHGPPSDGSLQSLGSGPNSPLV  
 FVPSSPRLSPFMHPPTHYLETSTPIYRSSVPSSQHSASREDQCGTSDDSYSVGESGAGAGAAGFEMAK  
 EMRFAVCSDYASGYHYGVWSCEGCKAFFKRSIQGHNDYMC PATNQCTIDRNRKSCQACRLRKCYEVGM  
 MKGGVRKDRGRVLRDRKRTGTSDRDKASKGLEHRTAPPQDRRKHISSSAAGGGGKSSVISMPDQVLLL  
 LQGAEPMLCSRQKVNRPYTEVTVM TLLTSMADKELVHMIAWAKKLPGF L QLSLHDQVQLLES SWLEVLM  
 IGLIWRSIHCPGKFIFAQDFILDRSEGDCVEGMAEIFDMLLATASRFRMLKLPKPEEFVCLKAIVLLNSGA  
 FSFCTGTMEPLHDGAAVQNMLDTITDALIHHINQSGCTAQQQSRRQAQLLLLLSHIRHMSNKMEHLYSM  
 KCKNKVPLYD L LLEMLDAHRVHRPDRPHETWSQADREPPFTSRNNRGSGGGGSSSAGSTSGTRVLENP  
 TGPGVLQYGRSAPSAPHPMKPTE

>Q6H9M4\_SPAAU

MAASPELDSRSLQLQEVDSSKPSERPSSPRQLPAAYSPPPLGMSHTVCI P SPYADSSHEYNHGHGPLNF  
 YSQSVLSYARQPVTDSPSYLCPSISPSAFWPSHNHPSMPSLTLQCPQPHVYNEPSPHAPWLEPKAHAVTT  
 SSAVISCNKLPGRKSDEREGEGANSSSCSSAVEKADMHFCAVCHDYASGYHYGVWSCEGCKAFFKRSIQGH  
 NDYICPATNQCTIDKNRRKSCQACRLRKCYEVGMMKCGVRRERC SYRGARHRRGGLQARDPTGRGLVVRVG  
 LGSRGQRHLHLEAPLTPLPQAKRVHHSAMSPEEFISRIMEAEPPEIYLMEDMNKPFTESSMMMSLTNLAD  
 KELVLMISWAKKIPGFVELSLADQIHLKCCWLEIILMLGLMWRSVDHPGKLIFSPDFKLNREEGQCVEGI  
 MEIFDMLLAATSRFRELKLRQREYVCLKAMILLNSYLC TNSPETAELESRNKLLRLLDSVIDALVWAIS  
 KLGLTTQQQTLRLGHLTMLLSHIRHVSNGMDHLSTMKRKNVVLVYD L LLEMLDANTTTSGSQASSPTS  
 ETFPDQHQPAPSHLQPGSDQAAADHTAVPPRGPAEAPILDGHLQALTLOSSPHFQSLEMT H MDSNQYI  
 HPEQWSLETRDAALSVDGSVDYMSPDPTVMDTDLVNGL

>Q7T3U5\_9TELE

MSSSPGPASASVSPALDSGKADRGDSPTFLPHLYTSPPLGMSQTICIPSPYLEACQDYSPSHGGEFNHGA  
 LTLYSPVSTSVIGYPHPVSESLVPLSPTIFWPSHTHTALS L HCPPQVAYSETHSHTAWKDARTHTLNQ  
 SSSVLTHAKLLAQQVEGDDGLNPSPGIVGNGDTHFCVCHDYASGYHYGVWSCEGCKAFFKRSIQGHNDY  
 MCPATNQCTIDKSRKSCQACRLRKC YEMMMKCGVRRERC SYRGARHRRNPQIRDSSGGALGVRGCSQH  
 HLEIPLNPTHLLFPSGGRAEGCGLSFSPEQLVNCILEAEPQICLREPVKKPYTEASMMMSLTSLADKEL  
 VLMISWAKKIPGFVELTSLDQVHLL E C C W L D I L M L G L M W R S V D H P G K L I F S P D L K L N R D E W N C V E G I M E I

FDMLLATTSRFRELKIQREEYVCLKAMILNLSNNCSLSQSPEDVESRGKVLRLLDVTDALVWSISRTG  
 LSSQQQSIRLAHLLMLLSHIRHLSNKGIEHLSSMKRKNVLLYDILLEMLDANTSQSSRMLVAHTEASLT  
 TDLHTSRPQPAPRESDQETQQRSPQAEETLHSSIHREDMDTD

>ESRB2\_CARAU

MSSSTGPAPASAPVQANRGNPNILPLLYTSQLGMDSQTICIPSPYVEACQDYSPPHGGEISHGALTLY  
 SPVSSPVLGYTHPPVSESLVPLNSAIFWPPHPHSTPSLHCPSPPLAYRETHAHTTWEDAKTHINQSSSVL  
 THAKLLGQQLDGDGLNPSGILGKGDTHFCVACHDYASGYHYGVWSCEGCKAFFKRSIQGHNDYICPAT  
 NQCTIDKSRKSCQACRLRKCYEVGMMKCGVRRERCSYRGGRRRNPPIRDSSGGAIGVRGHSQPHLEFP  
 LSPHPLFPLGDRAEGCGQNLSPQLVNCILEAEPPIYLREPIKPKPYTEASMMMSLTNLADKELVLMIS  
 WAKKIPGFVELTSLDQVHLLLECCWLDILMLGLMWRSDVHDPGKLI FSPDLKLNREDEGTCEGIMEIFDMLL  
 ATTSRFRELKIQREEYVCLKAMILNLSNCSRLPQTPEDVESRGKVLRLLDVTDALVWTISRTGLSSHQ  
 QSIRLAHLLMLLSHIRHLSNKGIEHLSTMKRKNVLLYDILLEMLDANTSQSSRMLAAHTKASLRMDTQQ  
 TTEILHTSKQQPALKESNQDTRHSPQAEQTVDKTLHRVDKTLHRVDVDTD

>ESR1\_SPAAU

MYPEDSRVSGGVATVDFLEGTYDYAAPTAPTPLYSHSTPGYYSAPLDAHGPPSDGSLQSLGSGPNSPLV  
 FVPSSPHLSPFMQPANHHYLETTSTPIYSVPSSQHSVSREDQCGTSDDSYVSGESGAGAGAAGFEMAKEM  
 RFCAVCSDYASGYHYGVWSCEGCKAFFKRSIQGHNDYMCPATNQCTIDNRNRKSCQACRLRKCYEVGMMK  
 GGVRKDRGRVLRDRKRTGTSDRDKASKGLEHRTAPPQDRRKHISSSAGGGGGKSSVISMPDPQVLLLLR  
 GAEPMLCSRQKVNRPYTEVTVMTLTSMADKELVHMIAWAKKLPGLQLSLHDQVQLLESSWLEVLMI  
 LIWRSIHCPGKLI FAQDLILDRSEGDCVEGMAEIFDMLLATASRFRMLKPKPEEFVCLKAII LLNSGAFS  
 FCTGTMEPLHDSAAVQNMLDTITDALIHINQSGCSAQQQSRRQAQLLLLLSHIRHMSNKGMEHLYSMKC  
 KKNKPLYDILLEMLDAHRVHRPDRPAETWSQADREPLFTSRNSSSSSSGGGGSSSAGSTSGPQVNLESP  
 TGPGVLQLRVHHPMKPTE

>Q8UW75\_ORYLA

MGTTLDSEKHQPLLQLQEVDSRAGSCVLSPNLSSSSPGLSHETSQPICIPAPYADLSHDFTSLPFYNPT  
 IFSYASPSMSECPVHQSLSASLFWQSHGHVGPITPLHRSQARAQHGQPIQSPWDGVLTTSGKVRRRSQE  
 SEEAVVSSGGKSELHYCAVCHDYASGYHYGVWSCEGCKAFFKRSIQGHTDYICPATNQCTIDKNRRKSCQ  
 ACRLRKCYEVGMTKCGVRKERSYSRSAPARRAGRLTSQGRMNGPKVSSGPKESSGNEQSSLHLTPEQLIA  
 RMMEAEPPIIYLMKDTKKPLTEAVVMMSLTNLADKELVHMITWAKKIPGFVELSLLDQVHLLLECCWLEVL  
 MMGLMWRVSGHPGKLI FSPDLSLSREEGSCVQGFVEIFDMLIAATSRVRELNLQREEYVCLKAMILNLSN  
 MCLSSSEGGGELHSRSLKLLCLLDAVTDALVWAIGKGLNFRQQYTRLAHLLMLLSHIRHVSNGMDHLHC  
 MKMKNMVPLYDILLEMLDAHIMSSRLPRQPPQDAADPTETSAQQQRSCCDVSKAWTTSSAGTAEEPQK  
 SD

>ESR3\_MICUN

MAVASSPEKDQPLLQLQKVDSSRVGGQVLSPTLSSSLETSQPICITSPYTDLGHDFPTIPFYSPTIFSYA  
 GPSISDCTSVHQSLNPSLFWPSRGHMGSPILPHHSQHGQPIQSPWVEISPLDNVLKTKQDGASLPLAVVP  
 VRHKSARRRSQESEEAVVTSGGKTDLHYCAVCHDYASGYHYGVWSCEGCKAFFKRSIQRDNEYICPATNE  
 CTIDKNRRKSCQACRLRKCYEVGMTKCGMRKERGNYSRSPQMRMTRLTSQGRTDSSSVLTGSAVVSLNAP  
 QPSALTSEQLIERLMEAEPEIYLMKDMKKPLTEAKVMMSLTNLADKELVHMITWAKKIPGFVELGLLDQ  
 VHLLLECCWLEVLVGLMWRVSDHDPGKLVFSPDLSLSREEGSCVQGFVEIFDMLLAATSRVRELKIQREEY

VCLKAMILNLSNMCLSSSESSKLLRLLDAVTDALVSAIGKTVLSFRQQYTRLAHLMLLSHIRHVSNGK  
MDHLHCMKMNMPVPLYDLLEMLDAHIMHSSRLPRRSPEQEPEDQADAPAPPSSSGSPSYTWTWPSSEGE  
AGEPQ

>Q7T2K7\_9LABR

MASSPGLDTPDPLLLRLQEVDSKASERPSSPGLLPVAVSPRQGMDSHTVYIIPSPYTDNNQEYNHGSGSV  
SFYSPSVLSYARPSATDSPSSSLCGPLSPSAFWPPHSQPNLPSLTLRCPQPLGYNESGLHAPWLESKPHNI  
SSSSSIIGCNKPLGKRSEEGVNGVNPSSVVGKADMHFCAVCHDYASGYHYGVWSCEGCKAFFKRSIQ  
GHNDYICPATNQCTIDKNRRKSCQACRLRKCIEVGMKCGVRRERCSYRGTTRHRRGGLQPRDPTGRGLVR  
VGLGSRAQRHLHLEGPLTPVTPLPQMSHVHHAAMSPPEEFIMRIMEAEPPEIYLMEEQKPFTEASMMMSL  
TNLADKELVLMISWAKKIPGFVELCLADQIHLLKCCWLEILMLGLMWRSDVHPGKLIFSPDFKLNREEGQ  
CVEGIMEIFDMLLAATSRFRELKLRQEEYVCLKAMILNLSNLCSSSPQTEEELESRNKLLRLLDSVIDAL  
VWAIKSLGLSTQQQTLRLGLHTMLLSHIRHVSNGKMDHLSTMKRKNVVLVYDLLEMLDANTSSSGSSQS  
SSSPNSDSYSDLHQPQHPSHLQPHQTTADHNNMPAHRQAEQILEEELHTLPLQSSPPFHSQMATHMDR  
NEYVHPQQHWSMDAEDAGPSVGSYMTSDRGVMEGALEVAGL

>Q6XSH1\_MICSA

MAGACSIKQDQLLQKQVDSRVRGSRVSPILNSPLETSQPICITSPYTDHSHDFTTIPFYNPTIFSYA  
SPGISDRPSVHQSLSPSLFWPSHGHVGSPIPLHHSQPRPQYRQPIQNPWAELSPLESTLTTSKSVRRRSQ  
ESQESVVSSEGGKADLHYCAVCQDYASGYHYGVWSCEGCKAFFKRSIQRHNDYICPATNQCTIDKNRRKSC  
QACRLRKCNEVGMTKFIRKERGNCRNPQMRVTRLSTQGRTRNPAVLTGPAAGSLIVPHSPALTPQLI  
ERIMDAEPPEIDLKMDMRRPLTEANVMMSLTLNADKELVHMIWAKKIPGFVELGLLDQVHLLLECCWLEV  
LMVGLMWRSDVHPGKLIFSRDLSLSREEGSCVQGFAEIFDMLIAATSRVRELKLRQEEYVCLKAMILNLS  
NMCLSSSEGESEELQSRKLLRLLDAVTDALVWAIKTLGTFRQQYTRLAHLMLLSHIRHVSNGKMDHLH  
CMKMNMPVPLYDLLEMLDAHIMHSSRLSHQPTQQDAEDQREAPARPHSSGSCPSNTWTWPGGGEPEQ

>Q9DEV4\_XENLA

MDSHEAVTSILPILPDLNLDNMPILPLNPAYLAARARQILGMEEGGQRSSPDTSQTSVPFTNLQPNVKQ  
ISYFNPEIQDPRIKDDSSIVSLYKVAAKESTLCQDYGSSPRNPSTPDTDPSLDFILYKNEDYDCFKISH  
GNTNEDSGCILPSTSAQTIYQPLSLNGHQYVTFQPTPMKETYLPQIQLPYVITYIRSDGDPERGIPIFSFEM  
LPQKICLICGDEASGCHYGVLTGSCVKVFFKRAIEGHQNYLCAGRNDICIVDKIRKNCPCSLRKRCCQAG  
MVLGGRKFKKFGRIKTGREIDTVVLQSPPTLSLECQQILIRRISSNSAQEIQFTPELLQILQSIPEVVY  
AGYDTPPETPSALLSSLNQLCERQLVCVVKWSKSLPGFRNLHIDDQITLLQYSWMSLMVFALGWRSYQH  
VSGQMLYFAPDLILNEQRMKDSFYTLCLSMWQLPQEFMKLQVTHEEFLCMKALLLNTIPIEGLKSQTN  
FDEMRSNYIRELAKAISLRHKGVIASSQRFYQLTKLMDSMHELKQLHLYCLNTFLQSRSLSVVEFPEMMS  
EVISAQLPKILAGMVKPLVFHKK

>ESR2\_ORENI

MMAAASSPEKLLQLEVDSSRAGSRILSPILGSSSPGLSHETSQPICIRSPYTDLGHDFTTIPFYSPTIF  
SYGGPSISECSSVHQSLASLFWPSHGRVGTPIITLHCQGRSQGQSAQTPWDSVITTSKSVRRRSQSESE  
ESMVSSGGKADLHYCAVCHDYASGYHYGVWSCEGCKAFFKRSIQGHNDYICPATNQCTIDKNRRKSCQAC  
RLRKCIEVGMTKGIRKERGNRNSQARRLTRLSSQGKTAEPKGITGPAEGSLNKPEKPAALTPQLIERI  
LEAEPPEIYLVKDAKRPLTEASVMMLLTNLADKELVHMIWAKKIPGFVELSLVDQVHLLLECCWLEVLMI  
GLMWRSDVHPGKLIFCPDLSLSREEGSCVQGFVEIFDMLIAATTRVRELKLRQEEYVCLKAMILNLSNMC

LSSSDCEDLQSRSKLLRLLDAMTDALVLAIGKTGLTFRQQYTRLAHLMLLSHIRHVSNGMDHLHCMK  
MKNIVPLYDLLEMLDAHIMHSSCLPHQPPQQDSKDQSEVPAPLHSSAGGPSNTWTPSSARAGGESQ

>ESR2\_SPAAU

MAVACSPEKDQSLQLQKVDSSRVILSPVLSSPMETNQPICIPSPYTDGRGHDFPTIPFYSATNFSYANPP  
AISDRPSVHQTLSPSLFWPSHGVTTLPLHHLQARPQHQQAVQSPWVELSPLDNVLTSSKSARRRSQEN  
EEGEVSSGGKADLHFCVACHDYASGYHYGVWSCEGCKAFFKRSIQRHNDYICPATNQCTIDKNRRKSCQA  
CRLHKCYNVGMTKCGMRKERGNFRDPQMRVTRLSSQGRTSGPSVLNGPAVGPLNTPQPALTSKQLIER  
IMEAEPPEIYLMKDMRRPLTEANIMMSLTNLADKELVHMITWAKKIPGFLELGLLDQVHLECCWLEVL  
IGLMWRSVDHPGKLIFSPDLSLSREEGSCVQGFLEIFDMLIAATSRVRELKLRQREYVCLKAMILNLSNM  
CLSSSEGSEELQSRSKLLRLLDAVTDALVWAIKGTGLTFRQQYTRLAHLMLLSHIRHVSNGMDHLHGM  
KMKNMPLYDLLEMLDAHIMHSSRLPRRSPQQETVEQCDA PARPHSPGTS GPNTWTPSCTGGRGEPQ

>Q7T2K8\_9LABR

MYPEESRSGGGVGTVDVFLEGTIDYTAAPTAPPLYSLSTQGYSAALDTHGQPSDSSIQSLGSGPSSPLVF  
VPSSPRLSPFMHLP SHHYLETSSTPVYRSSVSSSQSISREEHCGTSDESYSMGESGAGAAAGCFEMAKE  
MRYCAVCSYASGYHYGVWSCEGCKAFFKRSIQGHNDYMC PATNQCTIDRNRKSCQACRLRKYEVGMM  
KGGVRKDRGRVLRDRKRRGTSDKDNKSKDREQRTVPPQGRKKGSSVGGGKSPVISMPDQVLLLLQGA  
EPPILCSRQKLSRPYTEVTMMTLLTSM TDRELVHMIAWAKKLP GFQLTLHDQVQLLESSWLEVLMI  
GLIWRSIHCPGKLIFAQDLILDRSEGDCVEGMAEIFDMLLATTSRFRMLKLPKPEEFVCLKAIILLNSGAFSFC  
TGTMEPLHDNEAVQNMLDIITDALIHHSIQSGCSAHQQSRRQAQLLLLLSHIRHMSNKGMEHLYSMKCKN  
KVPLYDLLEMLDAHRLHRPDRPAESWYQTDREPAYSSATTTNDNSSSSPAGSRASQESPNRPPTGHSV  
LQFGGSRSDCTHIL

>Q6TGB3\_HAPBU

MYPEESRSGGGVATVDVFLEGSYDYAAPTAPPLYSHSTGCYSAPLDAHGPPSDGSLQSLGSGTTSPLV  
FVPSSPRLSPFMHPPSHHYLETTSTPVYRSSHQPVRDDQCGTRDEAYGLGELGAGAGGFEMTKETRFCA  
VCSYASGYHYGVWSCEGCKAFFKRSIQGHNDYMC PATNQCTIDKNRRKSCQACRLRKYEVGMMKGGMR  
KDRGRVLRREKRRAYDRDKPAKDLPHTKAPPHDGRKHATSSSSTSGGGGRSSLNSIPDQVLLLLQGAEP  
PTLCSRQKMNQPYTEVTMMTLLTSMADKELVHMIAWAKKLP GFQLQSLHDQVQLLESSWLEVLMI  
GLIWRSIHCPGKLIFAQDLILDRTEGTCVEGMAEIFDMLLATASRFRMLKLPKPEEFVCLKAIILLNSGAFSFC  
TG TMEPLHDSA AVQHMLDTITDALIFHISQLGCSAQHSRRQAQLLLLLSHIRHMSNKGMEHLYSMKCKNKV  
PLYDLLEMLDAQRIHRPVKPSQSWSQGDRDSPNTSSSGGGSDDEGTSSAGSSSGPQGNHESPRCENLS  
RAP TGPVQLYRGSHSDCTPIL

>Q800Q2\_ZOAVI

MYPEESRSGGGVTVDFLEGTIDYAAPTAPPLYSHSTPGFYSAPLDSHRPPSDGSLQSLGSGPTSPIV  
FVPSSPRLSPFLHPPSHHYLETTSTHVYVSPSSQQSVSREDQCGTSDESYSLVESGAGAGAGGFEMAKET  
RFCAVCSYASGYHYGVWSCEGCKAFFKRSIQGHNDYMC PATNQCTIDRNRKSCQACRLRKYEVGMMK  
GGVRKDRGHVLRDRKRRSDLSDRDKASKDLEHRTVPSQDRRKRSSISSACVGGKSM L TSMPPDQVLLLLQ  
CAEPPILCSRQKLSRPYTEVTMMTLLTSMADKELVHMIAWAKKLP GFQLGLHDQVQLLESSWLEVLMI  
GLIWRSIHCPGKLIFAQDLILDRNEGDCVEGMAEIFDMLLATTSRFRMLKLPKPEEFVCLKAIILLNSGAFS  
FCTATMEPLHDTAAVQHMLDTITDTLIHHIGQSGCSVQQSRRQAQLLLLLSHIRHMSNKGMEHLYSMK  
CKNKVPLYDLLEMLDAHRLHRPDKPGESWFPADGETLCTTSDNISSGGSGSGPRVSHDPSRAPTVLQYG

GSISDCTHIL

>ESR1\_ORENI

MYPEESRSGGGVATVDFLEGTYDYAAPTAPTPLYSHSTTGCYSAPLDAHGPLSDGSLQSLGSGPTSPLV  
 FVPSSPRLSPFMHPPSHHYLETTSTPVYRSSHQPVPREDQCGTRDEAYSVGELGAGAGGFEMTKDTRFCA  
 VCSDYASGYHYGVWSCEGCKAFFKRSIQGHNDYMC PATNQCTIDKNRRKSCQACRLRKCYEVGMMKGGMR  
 KDRGRVLRREKRRACDRDKPAKDLPHTRASPQDGRKRAMSSSSSTSGGGGRSSLNMPDQVLLLLLQGAEP  
 PILSSRQKMSRPHYTEVTIMTLTSMADKELVHMITWAKKLPGFQLQSLHDQVLLLESSWLEVLMIGLIWR  
 SIQCPGKLIFAQDLILDRNEGTCVEGMAEIFDMLLATASRFRVLKPKPEEFVCLKAII LLNSGAFSFCSTG  
 TMEPLHDSAAVQHMLDTITDALIFHISHLGC SAQQQSRQAQLLLLLSHIRHMSNKGMEHLYSMKCKNKV  
 PLYDLLLLLEMLDAHRIHRPVKPFQSWSQGDRDSPTASSTSSSGGGGGDDEGASSAGSSSGPQGSHESPRE  
 NLSRAPTGPGVLQYRGS SHSDCTRIP

>Q804Q7\_ACASC

MAVACSPEKDQSLQLQKVDSSRVILSPVLSSP METNQPICIPSPYTD RGHDFPAIPFYSP TNFSYANPP  
 SISDRPSVHQTLSSSLFWPSHGVTTLPLHHLQARPQHGPVQSPWVELSPLDNVLTSSKSARRRSQES  
 EGEVSSGGKADLHFCVACHDYASGYHYGVWSCEGCKAFFKRSIQRHNDYICPATNQCTIDKNRRKSCQA  
 CRLHKCYNVGMTKCGMRKERGNFRNPQMRVTRLSSQGRTPAVGPLIAPQPPALTSKQLIERIEAEP  
 PEIYLMKDVRRPLTEANIMMSLTNLADKELVHMITWAKKIPGFLELGLLDQVHLLLECCWLEVLMIGLMWR  
 SVDHPGKLIFSPDLSLSREEGSCVQGFLEIFDMLIAATSRVRELKLRQEEYVCLKAMILLNSNMCLSSSE  
 GSEELQSRSKLLHLLDAVTDALVWAI AKTGLTFRQYTRLAHLLMLLSHIRHVS NKGMDHLHGMMKNMV  
 PLYDLLLLLEMLDAHIMHSSRLPRRSPQOETGDQCDGPARPHSPGPSGPSNTWTPSSTGGRGEPQ

>Q8QHL0\_PAROL

MYPEESRSGGGAATVDFLEGTYDYAAPTAPQTPLYSHSTSGYYSAPLDAHGPPSDGSRHSLGSGPTS PHV  
 YVPSSPRLSPFMHPPSHHYLETTATS VYRSSQQPVTREDHCGPRDESFSVGETGAAAGAE GFEMAKETRF  
 CAVCS DYASGYHYGVWSCEGCKAFFKRSIQGHNDYMC PATNQCTIDRNRKSCQACRLRKCYEVGMMKGG  
 VRKDRSHVLRDRKRRAGTNRDRKASKDQDHKTVP LQDGRKSSSSTAGGKSSVTAMLPDQV LVLQGAEP  
 ILCSRQKLNQPHYTEVTMMTLTSMADRELVHMI AWAKKLPGFQLQSLHDQVQLLESSWLEVLMIGLI WRS  
 IHCPGKLIFAQDLILDRNEGNCVEGMAEIFDMLLATASRFRMLKPKSEEFVCLKAII LLNSGFSFCTGT  
 MEPLHNTAAVQDMLETITDALIHHSQSGCPVQQWRRQAQLLLLLSHIRHMSNKGMEHLYSMKCKNKVP  
 LYDLLLLLEMLDAHCLHRPARPAQSWLQADREPSAAGNNNNNSSIIISGGGSSSASSGHRGSQESPSRATT  
 GPSVLQHGGSRPDCTHIL

>ESR1 ICTPU

MSEEQARAEAPAGARQRRRSELEGYSVSLASLKLSPMYPEEEQRTTGGISSTAHYLDGTFNYTTNP DATN  
 SSVDYYSVAPEPQEENLQPLPNGSSSPPVFPSSPQLSPFLGHPPAGQHTAQQVPYYLEPSGTSIYRSSV  
 LASAGSRVELCSAPGRQDVYTA VGASGPSGASGPSAIGLVKEIRYCSVCS DYASGYHYGVWSCEGCKAF  
 FKRSIQGHNDYVCPATNQCTIDRNRKSCQACRLRKCYEVGMMKGGFRKERGGRIKHNRRPSGLKERER  
 GYSKAQSGSDVREALPQDQSSSGIGGGVADVCMSP EQVLLLLLRAEPPTLCSRQKHSRPHYSELTIMSL  
 LTNMADRELVHMI AWAKKVPGFQDLSLHDQVQLLESSWLEILMIGLI WRSIYTPGKLIFAQDLILDKSEG  
 ECVEGMAEIFDMLLATVARFRTLKPKSEEFVCLKAII LLNSGAFSFCSSPVEPLRDGFMVQCMMDNITDA  
 LIYYISQSGISVQLQSRQAQLLLLLSHIRHMSYKMEHLYSMKCKNKVPLYDLLLLLEMLDAHRLRPLGKV  
 PRIWADRVSSTTTATPTNTTTTTTTTTTHHPSNGSTCPADLPSNPPGPGQSPSP

>Q6W5G9\_XENTR

MLFFCLFIIMLSIPVASVFIAAAAAPVYSSASLSYAASETFGSSSLTGLHTLNNVPPSPVVFLOTPQLS  
 PFIHHHGQQVPYYLESEQGTFVAVREAAAPTFFYRSSSDNRRQSGRERMTSANDKGPPSMESTKETRYCAVC  
 SDYASGYHYGVWSCEGCKAFFKRSIQGHNDYMCPATNQCTIDKNRRKSCQACRLRKYEVGMMKGGIRKD  
 RRGGRMLKHKRQKEEQEKNDVTPSEIRTTSIWVNPSVKSMKLSPLVSLTAEQLISALMEAEPPIVYSEH  
 DSTKPLSEASMMTLLTNLADKELVHMINWAKRVPGFVDLTLHDQVHLLLECAWLEILMVGLIWRVSEHPGK  
 LSFAPNLLLDNRNQRCVEGLVEIFDMLVTTATFRMMRLRGEEFICLKSIILLNSGVYTFLSSTLESLED  
 TDLIHIILDKIIDTLVHFMAKSGLSLQQQRRLAQLLLLILSHIRHMSNKGMEHLYSMKCKNVVPLYDLLL  
 EMLDAHMRMHTPKDKATAQEEDSRSPLETTTANGASPCLOPFYTTSTEEVSLQSTV

>ESR1\_OREAU

MYPEESRSGGGVATVDFLEGLMTMTAPTAPTPLYSHSTTGCYSAPLDAHGPLSDGSLQSLGSGPTSPLV  
 FVPSSPRLSPFMHPPSHHYLETTSTPVYRSSHQPVPREDQCGTRDEAYSVGELGAGAGGFEITKNTRFCA  
 VCSDYASGYHYGVWSCEGCKAFFKRSIQGHNDYMCPATNQCTIDKNRRKSCQACRLRKYEVGMMKGGMR  
 KDRGRVLRREKHGPAQRQTSQNLPTHKASPQDGRKRAMSSSSSTSGPGGRSSLNNMPPDQVLLLLQGAEP  
 ILCSRQKMSRPYTEVTIMTLLTSMADKELVHMITWAKKLPGFQLQSLHDQVLLLESSWLEVLMIGLIWR  
 IQCPGKLIFEEIDLDRNEGTCVEGMAEIFDMLLATVRFVRLKLPKEEFVCLKAIILLNSGAFSFCGTGM  
 EPLHDSVAVQHMLDTITDALIFHISHFGCSAQQQSRRQAQLLLLLSHIRHMSNKGMEHLYSMKCKNVVPL  
 YDLLLLLEMLDAHRIHRPVKPSQSWSQGDRDPTASSTSSRGGGGDDEGASSAGSSSGPQGSHESPREN  
 LSRAPKPGVLYRGSHTSDTRIP

>Q69F36\_CARAU

MYPKEEHSVGGISSSVNYLDGSYEFNPNTQTYGTSSPAEPASVGYYPAPPDPHVPPVEEHLQSLGSPRIF  
 APSSPQLSPYLSHPGGHPSTHQASYLDTPSSSLYRSSVVSQQAGGGLCEELCSASDRQEMYSGSRGTG  
 GFDSEKETRFCAVCSDYASGYHYGVWSCEGCKAFFKRSIQGHNDYVCPATNQCTIDKNRRKSCQACRLR  
 KYEVGMVKGIRKDRGGRAIRRRRRSGNEDLIKSYSEQSSHSGSRTAPPQDKRKKSSGGGVSALCLPPD  
 QVLLLLLEAEPPAVCSRQKHSRPFTEITMMSLLTNMADKELVHMIAWAKKVPGFQDLSLHDQVQLLESSW  
 LEVLMIGLIWRSIHSPGKLIFAQDLILDRSEGECEVEGMEIFDMLLATVARFRSLKLEEFVCLKAIIL  
 LNSGAFSFCSSSVEPLMDSFMVQCMLDNITDALIYICISKSGATPQLQSRQAQLLLLLSHIRHMSNKGME  
 HLYRMKCKNRVPLYDLLLLLEMLDAQQFHSSRKVQRPWSQSEKDSWSTPTAGSSSPSRGPGAMQPNTARVQT  
 PDLCPVQQLKNVKTQVNLANRFEGGTEVSLCALSENTLDSRRPI

>Q95MF0\_MACAR

MDIKNSPSSLNSPSSYNCSQSILPLEHGSIIYIPSSYVESHHEYAMTFYSPAVMNYISIPSNVTNLEGGPG  
 RQTASPNVLWPTPGHLSPLAVHRQLSHLYAEPQKSPWCEARSLEHTLPVNRETLKRKVSNGRCTSPTVTS  
 SSKRDAHFCVCSDFASGYHYGVWSCEGCKAFFKRSIQGHNDYICPATNQCTIDKNRRKSCQACRLRKY  
 EVGMVKCGSRRERCYRLVRRQRSADQVHCASKAKRSGSHTPLVRELLLDALSPEQLVLTLLLEAEPPHV  
 LISRPSAPFTEASMMMSLTKLADKELVHMISWAKKIPGFVELSLFDQVRLLESCWMEVLMVGLMWRSIDH  
 PGKLIFAPDLVLDREGEKVEGILEIFDMLLATTSRFRLEKQHKYLCVKAMILLNSNMYPLVTATQDA  
 DSSRKLALHLLNAVTDALVWVIAKSGISSQQSMRLANLLMLLSHVRHARAESHSLTSFGMEDGDTLLP  
 EATDGSVTF

>ESR1\_BRARE

MYPKEEHSAGGISSSVNYLDGAYEYPNPTQTFGTSSPAEPASVGYYPAPPPDPHEEHLQTLGGGSSSPLMF  
 APSSPQLSPYLSHHGGHHTTPHQVSYLLDSSSSTVYRSSVVSSQQAAVGLCEELCSATDRQELYTGSRAA  
 GGFDSGKETRFCAVCSYASGYHYGVWSCEGCKAFFKRSIQGHNDYVCPATNQCTIDRNRKSCQACRLR  
 KCYEVGMMKGGIRKDRGGRSVRRERRRSSNEDRDKSSSDQCSRAGVRTTGPQDKRKKRSGGVVSTLCMSP  
 DQVLLLLLGAEPPAVCSRQKHSRPTYTEITMMSLLTNMADKELVHMIAWAKKVPGFQDLSLHDQVQLLESS  
 WLEVLMIGLIWRSIHSPGKLIFAQDLILDRSEGECEVEGMAEIFDMLLATVARFRSLKLLKEEFVCLKAII  
 LINSGAFSFCSSPVEPLMDFMVQCMLDNITDALIYICISKSGASLQLQSRRQAQLLLLLSHIRHMSNKG  
 EHLRYMKCKNRVPLYDLLEMLDAQRFQSSGKVQRVWSQSEKNPPSTPTTSSSSSNNSPRGGAAAIQSNG  
 ACHSHSPDP

>Q5XXP1\_9TELE

MYPKEEHSAGEISSSVNYLDGAYEYDPDPTQTYGTTSPAEPPLSVGYFLAPTDHHAPPVEEHMQTFSGESS  
 PLMFAPTSPQLSPYLSHHGGHSTHQVSYLLDSSSSTVYRSSVVSSQQAGVGLCEVLCSATDRQEMYTGS  
 RAAGGFDSEKETRFCAVCSYASGYHYGVWSCEGCKAFFKRSIQGHNDYVCPATNQCTIDRNRKSCQAC  
 RLRKCYEVGMMKGGIRKDRGGRAIRRRERKSDNEDRDKSYSEQSSRVGLRTPQDKRKKSSAEVVSALCMP  
 PDQVLVLLLGAEPPAVCSRQKHSPPYTEITMMSLLTNMADKELVHMIAWAKKVPGFQDLSLHDQVQLLES  
 SWLEVLMIGLIWRSIHSPGKLIFAQDLILDRNEGECEVEGMAEIFDMLLATVARLRSLKLLKEEFVCLKAI  
 ILLNSGAFSFCSSPVEPLMDSFMVQCMLDNITDALIYIGISKSGASLQLQSRRQAQLLLLLSHIRHMSNKG  
 MEHLYHMKCKNRVPLYDLLEMLDAQRFQSPGEVQRLGAQSEKDPSTPTTRGPGATQPNTGCLSQSPDP

>ESR2\_ICTPU

MSSSLSPTLQTVNGMDQDEPLPLFPESHYPTALGVDRGTVCIPSPYADNGHAEMSFCGPSAPENPAIAPPL  
 SPSLFWSSHNPHAMPALPLHCPALPYSEPHIHTAWVDTKPHTSGRHSSFLSRPKLFGKRPEDEGDGDEAL  
 DDDDPSSSSS GAVVKRDMHFCVCHDYASGYHYGVWSCEGCKAFFKRSIQGHNDYICPATNQCTIDKNRR  
 KSCQACRLRKCYLEMGMKCGARRERCYRASRRRTAPMRDGSARVGVGQSQRPLPHTPLHVSLSIPVSRA  
 SAESGFSGLSPEQLVYCI LEAEPPIYKQMKKPYTESTVMMSLTQLADKELVLMISWAKKIPGFVELS  
 LAHQVQLLECCWLEVLMLGLMWRSIDHPGKLIFSLDLKLNDRDEGNCVEGIMEIFDMLLAGSSRFRELKQ  
 KEEYVCLKALILLNSSMYMTSSACEKDLESRTKLLRLLDAVTDALVWAI SRTGLSTQQQSARLAHLLMLL  
 SHIRHLSNKGMEHLSSMKRKNVLLYDLLEMLDANMAQSRHVSTSVCTDPVTPATSPNTPLPPQLHSPV  
 AHHVTQVNESQCSQE

>Q90WV1\_CARAU

MYPKEEHSTGGISSSLNYLDGAYDFSNLSETFGTSSPTEPASFGYYPAPPPDPHAPPAAEHLQNLGTGPGS  
 PLMFAPSSPQLSPYLNHHGGHSTHQVSYLLDSSSSTVYRSSVVCSQQAGVGLCEELCSAADRQELFSGS  
 RAAGGFDSEKETRFCAVCSYASGYHYGVWSCEGCKAFFKRSIQGHNDYVCPATNQCTIDRNRKSCQAC  
 RLRKCYEVGMMKGGIRKERGGRAIRDRRRSGNEDRVKSYSEQSNRTGLRTAPPQDRRKSSTGVVSTLC  
 MPPDQVLVLLLGAEPPAVCSRQKHSRPTYTEITMMSLLTNMADKELVHMIAWAKKVPGFQDLSLHDKVQLL  
 ESTWLEVLMIGLIWRSIHSPGKLIFAQDLILDRNEGECEVEGMAEIFDMLLATVTRFRSLKLLKEEFVCLK  
 ALILLNSGAFSFCSSPVEPLMDSFMVQCMLDNITDAFIYIGISKSGASLQLQSRRQAQLLLLLSHIRHMSN  
 KGMHLYRMKCKNRVPLYDLLEMLDAQRFHSSGKVQRLWAQSEKDPSTPTTSSRGPMTLPNIACHEQ  
 SPDP

>Q95ME9\_CALJA

MDIKNSPSSLNSPSSYNGQSILPLEHGPIYIPSSYVESHHEY PAMTFYSPAVMNYSIPSSVTNLEEGPG



RQITSPNMLWSTPGHLSPLAVHHQLSHLYAEPQKSPWCEARSLEHTLPVSRET LKRKVSNGHCASPV TGP  
SSKRDAHFCVAVCSYASGYHYGVWSCEGCKAFFKRSIQGHNDYICPATNQCTIDKNRRKSCQACRLRKCY  
EVMVKCGSRRERCYRLVRRQGNAAEQ LHCAGKAKRSGGHVPRVRELLLSALSPEQLVLTLLAEAPPHV  
LISRPSVPFTEASMMMSLTKLADEELVHMISWAKKIPGFVELSLLDQVRLLESCWLEVL MVGLMWRSIDH  
PGKLI FAPNLILDRDEGKCV EGI LEVFDMLLATTSRFRELK LQHKEYLCVKAMVLLNSQYDPLVTATQDA  
ESSQKLAHLLNAVTDALVWVIAKSGFSSQQQSVRLANLLMLLSHIRHARA EKASHSLTSFGMEDGD

>Q91Z86\_MOUSE

MTFYSPAVMNYSPSS TGNLEGGPVRQTASPNVLWPTSGHLSPLATHCQSSLLYAEPQKSPWCEARSLEH  
TLPVNRET LKRKLGSGCASPV TSPSAKRDAHFCVAVCSYASGYHYGVWSCEGCKAFFKRSIQGHNDYIC  
PATNQCTIDKNRRKSCQACRLRKCYEVMVKCGSRRERCYRIVRRQRSASEQVHCLNKAKRTSGHTPRV  
KELLLNSLSPEQLVLTLLAEAPPNVLSRPSMPFTEASMMMSLTKLADKELVHMIGWAKKIPGFVELSLL  
DQVRLLESCWMEVLMVGLMWRSIDHPGKLI FAPDLVDRSSEDPHWHVAQTKSAVPRDEGKCV EGI LEIF  
GMLLAT TARFRELK LQHKEYLCVKAMILLNSSMYPLATASQEAESSRKLTHLLNAVTDALVWVISKSGIS  
SQQQSVRLANLLMLLSHVRHISNKGMEHLLSMKCKNVVPVYD LLEMLNAHTLRGYKSSISGSECCSTED  
SKSKEGSQNLQSQ

>ESR2\_CHICK

MAFCSPAMLNYN IASNFGDSE SASVRQTSSPSVLWSAPGHLSPLTLHCQSSLLYAEQKSPWCEVRPLDP  
VLPVTRET LKRKTNGSDCTSPIASNPGSKRDAHFCVAVCSYASGYHYGVWSCEGCKAFFKRSIQGHNDYI  
CPATNQCTIDKNRRKSCQACRLRKCYEVMVKCGSRRERCYRILRRHRNSED CMGKTKKYNEAATRVKE  
ILLSTVSPEQFVLTLLAEAPPNVLSRPSKPFTEASMMMSLTKLADKELVHMIGWAKKIPGFIDLSLYDQ  
VRLLESCWMEVLMIGLMWRSIDHPGKLI FAPDLVDRDEGKCV EGI LEIFDMLLAMTSRFRELK LQHKEY  
LCVKAMILLNSSMFP LSP EEPESNRKLHLLNVVTDALVWVIAKSGIP SQQTTRLANLLMLLSHVRHAS  
NKGMEHLLSMKCKNVVPVYD LLEMLNAHTLRGQRKSPVTHPEFEQVSHFQV

>ESR2\_COTJA

MAFCSPAMNYN IASNFGDSE SASVRQTSSPSLLWSAPGHLSPLTLHCQLSLLYAEQKSPWCEARPLEP  
VLPVSRET LKRKTNGSDCTSPIASNPGSKRDAHFCVAVCSYASGYHYGVWSCEGCKAFFKRSIQGHNDYI  
CPATNQCTIDKNRRKSCQACRLRKCYEVMVKCGSRRERCYRILRRHRNSED CMGKTKKYNEAATRVKE  
ILLSTVSPEQFVLTLLAEAPPNVLSRPSKPFTEASMMMSLTKLADKELVHMIGWAKKIPGFIDLSLYDQ  
VRLLESCWLEVL M IGLMWRSIDHPGKLI FAPDLVDRDEGKCV EGI LEIFDMLLAMTSRFRELK LQHKEY  
LCVKAMILLNSSMFP LSAE EPEPNRKLHLLNVVTDALVWVIAKSGIP SQQTTRLANLLMLLSHVRHAS  
NKGMEHLLSMKCKNVVPVYD LLEMLNAHTLRGQRKSPVTHPDFEQVSHFQV

>ERR3\_HUMAN

MDSVELCLPESFSLHYEEELLCRMSNKDRHIDSSCSSFIKTEPSSPASLTDSVNHHS PGSSDASGSYSS  
TMNGHQGLD SPPLYSPAPILGGSGPVRKLYDDCSSTIVEDPQTKCEYMLNSMPKRLCLVCGDIASGYHY  
GVASCEACKAFFKRTIQGNIEYSCPATNECEITKRRRKSCQACRFMKCLKVGMLKEGVR LDRVGRGRQKY  
KRRIDAENSPYLNQVLVQPAKKPYNKIVSHLLVAEPEKIYAMPDPTVPDS DIKALTTLCDLADRELVVII  
GWAKHIPGFSTLSLADQMSLLQSAWMEILILGVVYRSLSFEDELVYADDYIMDEDQSKLAGLLDLNNAI L  
QLVKYKYSMKLEKEEFVTLKAIALANSDSMHIEDVEAVQKLQDVLHEALQDY EAGQHMEDPRRAGKMLMT  
LPLLRQTSTKAVQHFYNIKLEGKVP MHKLFLEMLEAKV

## &gt;ERR3\_MOUSE

MDSVELCLPESFSLHYEEELLCRMSNKDRHIDSSCSSFIKTEPSSPASLTDSVNHHSPPGSSDASGSYSS  
 TMNGHQGLDSPPLYPSAPILGGSGPVRKLYDDCSSTIVEDPQTKCEYMLNSMPKRLCLVCGDIASGYHY  
 GVASCEACKAFFKRTIQGNIEYSCPATNECEITKRRRKSCQACRFMKCLKVGMLKEGVRLDRVRGGRQKY  
 KRRIDAENSPYLNPLVQPAKKPYNKIVSHLLVAEPEKIYAMPDPTVPDSDIKALTTLCDLADRELVVII  
 GWAKHIPGFSTLSLADQMSLLQSAWMEILILGVVYRSLSFEDELVYADDYIMDEDQSKLAGLLDLNNAI  
 LQLVKKYKSMKLEKEEFVTLKAIALANSDSMHIEDVEAVQKLQDVLHEALQDYEAGQHMEDPRRAGKMLMT  
 LPLLRQTSTKAVQHFYNIKLEGKVPMHKLFLEMLEAKV

## &gt;ERR1\_MOUSE

DAARRGGAAGGGGPRSPRRSGPLGPHACPPALPEPKVTSTMSQVVGIEPLYIKAEPASPDSPKGSSETE  
 TEPPVTLASGPAPARCLPGHKEEEDGEGAGSGEQSGKLVLSLSPKRLCLVCGDVASGYHYGVASCEACK  
 AFFKRTIQGSIEYSCPASNECEITKRRRKACQACRFKCLRVGMLKEGVRLDRVRGGRQKYKRRPEVDPL  
 PFPGFPPAGPLAVAGGPRKTAPVNLVSHLLVVEPEKIYAMPDPASPDGHLPAVATLCDLFDREIVVTIS  
 WAKSIPGFSSLSLSDQMSVLQSVWMEVLVLGVAQRSPLPLQDELAFADLVLDEEGARAAGLGDLAGAALLQ  
 LVRRLQALRLEREEYVLLKALALANSDSVHIEDAEAVEQLREALHEALLEYEAGRAGPGGGAERRRAGRL  
 PCTLPLLRQTAGKVLAFYGVKLEGKVPMHKLFLEMLEAMMD

## &gt;Q5UKY7\_CHICK

MSSKDRHIDSSCSSYIKTEPSSPASLTDSINHHSPPGSSDASGSYSSTMNGHQGLDSPPLYPSATGLGG  
 NGPVRKRYDDCSSTIAEDSQTKCEYMLNSMPKRLCLVCGDIASGYHYGVASCEACKAFFKRTIQGNIEYS  
 CPATNECEITKRRRKSCQACRFMKCLKVGMLKEGVRLDRVRGGRQKYKRRIDAENSPYLNPLVQPAKKP  
 YNKIVSHLLVAEPEKIYAMPDPTVPDSDIKALTTLCDLADRELVVIIIGWAKHIPGFSTLSLADQMSLLQ  
 SAWMEILILGVVYRSLSFEDELVYAEDYIMDEDQSKLAGLLDLNNAIQLVKKYKSMKLEKEEFVTLKAIA  
 LANSDSMHIEDVEAVQKLQDVLHEALQDYEAGQHMEDPRRAGKMLMTLPLLRQTSTKAVQHFYNIKLEGK  
 VPMHKLFLEMLEAKV

## &gt;ERR3\_PONPY

MSNKDRHIDSSCSSFIKTEPSSPASLTDSVNHHSPPGSSDASGSYSSTMNGHQGLDSPPLYPSAPILGG  
 SGPVRKLYDDCSSTIVEDPQTKCEYMLNSMPKRLCLVCGDIASGYHYGVASCEACKAFFKRTIQGNIEYS  
 CPATNECEITKRRRKSCQACRFMKCLKVGMLKEGVRLDRVRGGRQKYKRRIDAENSPYLNPLVQPAKKP  
 YNKIVSHLLVAEPEKIYAMPDPTVPDSDIKALTTLCDLADRELVVIIIGWAKHIPGFSTLSLADQMSLLQ  
 SAWMEILILGVVYRSLSFEDELVYADDYIMDEDQSKLAGLLDLNNAIQLVKKYKSMKLEKEEFVTLKAIA  
 LANSDSMHIEDVEAVQKLQDVLHEALQDYEAGQHMEDPRRAGKMLMTLPLLRQTSTKAVQHFYNIKLEGK  
 VPMHKLFSEMLEAKV

## &gt;Q6W5G5\_XENLA

MSSANDKGPPSMESTKETRYCAVCSYASGYHYGVWSCEGCKAFFKRSIQGHNDYMCNATNQTIDKNRR  
 KSCQACRLRKYEVGMMKGGIRKDRRGRMLKHKRQKEEQEQKNDVDPSEIRTASIWVNPVSKSMKLSPV  
 LSLTAEQLISALMEAEPIVYSEHDSTKPLSEASMMTLLTNLADKELVHMINWAKRVPGFVDLTLHDQVH  
 LLECAWLEILMVGLIWSVEHPGKLSFAPNLLLDRNQGRVCEGLVEIFDMLVTTATRFRMMRLRGEFIC  
 LKSIILLNSGVYTFLSSTLESLEDTLIHIILDKIIDTLVHFMAKSGLSLQQQRRRLAQLLLILSHIRHM  
 SNKGMEHLYSMKCKNVPLYDLLLLLEMLDAHRIHTPKDKTTTQEEDSRSPPTTTVNGASPCLPYYTNTTEE  
 VSLQSTV

>Q6W5G6\_XENLA

MSSANDKGPPSMESTKETRFCAVCSYASGYHYGVWSCEGCKAFFKRSIQGHNDYMCPATNQCTIDKNRR  
KSCQACRLRKCYEVGMMKGGIRKDRRGGRMLKHKQQKEEPEQKNDVNPSEIRTASIWVNPVSKSMKLSPV  
LSLTAEQLISALMEAEPPIVYSEHDSTKPLSEASMMTLLTNLADKELVHMINWAKRVPGFVDLTLHDQVH  
LLECAWLEILMVGLIWRVVEHPEKLSFAPNLLLDRNQGRVCEGLVEIFDMLVTTATRFRMMRLHGEEFIC  
LKSIIILLNSGVYTFLSSTLESLEDTDLIHIILDKIIDTLVHFMAKSGLSLQQQQRRRLAQLLLIILSHIRHM  
SNKGMHELYSMKCKNVVPLYDLLLEMLDAHRIHTPKDKTTTQEEESRSPLSTTVNGASPCLPFYKNTTEE  
VSLQSTV

>ERR2\_RAT

MSSEDRHLGSSCGSFIKTEPSSPSSGIDALSHHSPSGSSDASGGFGMALGTHANGLDSPPMFAGAGLGGN  
PCRKSYEDCTSGIMEDSAIKCEYMLNAIPKRLCLVCGDIASGYHYGVASCEACKAFFKRTIQGNIEYSCP  
ATNECEITKRRRKSCQACRFMKCLKVGMLKEGVRLDRVRGGRQKYKRRLDSENSPYLSLQISPPAKKPLT  
KIVSYLLVAEPDKLYAMPDDVPEGDIKALTTLCDLADRELVFLISWAKHIPGFSNLTLGDQMSLLQSAW  
MEILILGIVYRSLPYDDKLAYAEDYIMDEEHSRLVGLLELYRAILQLVRRYKCLKVEKEEFVMLKALALA  
NSDSMYIENLEAVQKLQDLLHEALQDYELSQRHEEPRRAGKLLLTPLLRQTAAKAVQHFYSVKLQGKVP  
MHKLFLEMLEAKV

>Q6Q6F4\_BRARE

MSNKDRHIESSCPSYIKTEPSSPASLTDVNHHSPPGSSDASGSYSSTMNGHQGLDPTLYGPTGALGP  
SGTGAKRYEDCSSTITEDSQIKCEYMLNSMPKRLCLVCGDIASGYHYGVASCEACKAFFKRTIQGNIEYS  
CPATNECEITKRRRKSCQACRFMKCLTVGMMREGVRLDRVRGGRQKYKRRIDAENSPYLNPLALPPKKP  
YNKIVSHLLVAEPEKIYAMPDPTVPDSDIKALTTLCDLADRELVVNIGWAKHIPGFSTLSLADQMSLLQS  
AWMEILILRVVYRSLSFEDKLVYAEDYIMDEDQSKLAGLLDLNNAIQLVKKYKSMKLEKEEFVTLKAIA  
LANSDSMHIEDVEAVQKLQDVLHEALQDYEAGQHVDPARRAGKLLMTPLLRQTSTKAVQHFYSIKQDGK  
VPMHKLFLELLEAKV

>Q8C7A6\_MOUSE

MSSEDRHLGSSCGSFIKTEPSSPSSGIDALSHHSPSGSSDASGGFGIALSTHANGLDSPPMFAGAGLGGN  
PCRKSYEDCTSGIMEDSAIKCEYMLNAIPKRLCLVCGDIASGYHYGVASCEACKAFFKRTIQGNIEYNCP  
ATNECEITKRRRKSCQACRFMKCLKVGMLKEGVRLDRVRGGRQKYKRRLDSENSPYLNLPISPPAKKPLT  
KIVSNLLGVEQDKLYAMPNDIPEGDIKALTTLCELADRELVFLINWAKHIPGFPSLTLGDQMSLLQSAW  
MEILILGIVYRSLPYDDKLAYAEDYIMDEEHSRLVGLLDLYRAILQLVRRYKCLKVEKEEFMILKALALA  
NSDSMYIENLEAVQKLQDLLHEALQDYELSQRHEEPRRAGKLLLTPLLRQTAAKAVQHFYSVKLQGKVP  
MHKLFLEMLEAKV

>ERR2\_MOUSE

MSSEDRHLGSSCGSFIKTEPSSPSSGIDALSHHSPSGSSDASGGFGIALSTHANGLDSPPMFAGAGLGGN  
PCRKSYEDCTSGIMEDSAIKCEYMLNAIPKRLCLVCGDIASGYHYGVASCEACKAFFKRTIQGNIEYNCP  
ATNECEITKRRRKSCQACRFMKCLKVGMLKEGVRLDRVRGGRQKYKRRLDSENSPYLNLPISPPAKKPLT  
KIVSNLLGVEQDKLYAMPNDIPEGDIKALTTLCELADRELVFLINWAKHIPGFPSLTLGDQMSLLQSAW  
MEILILGIVYRSLPYDDKLAYAEDYIMDEEHSRLVGLLDLYRAILQLVRRYKCLKVEKEEFMILKALALA  
NSDSMYIENLEAVQKLQDLLHEALQDYELSQRHEEPRRAGKLLWTLPLLRQTAAKAVQHFYSVKLQGKVP

MHKL FLEM LEAKV

>Q8CCV5\_MOUSE

MSSEDRHLGSSCGSFIKTEPSSPSSGIDALSHHSPSGSSDASGGFGIALSTHANGLDSPPMFAGAGLGGN  
 PCRKSYEDCTSGIMEDSAIKCEYMLNAIPKRLCLVCGDIASGYHYGVASCEACKAFFKRTIQGNIEYNCP  
 ATNECEITKRRRKSCQACRFMKCLKVGMLKEGVRLDRVRGGRQKYKRRLDSENSPYLNLPI SPPAKKPLT  
 KIVSNLLGVEQDKLYAMPNDIPEGDIKALTTLCELADRGLVFLINWAKHIPGFPSLTLGDQMSLLQSAW  
 MEILILGIVYRSLPYDDKLAYAEDYIMDEEHSRLVGLLDLYRAILQLVRRYKCLKVEKEEFMILKALALA  
 NSDSMYIENLEAVQKIQDLLHEALQDYELSORHEEPRRAGKLLLTLP LLRQTAAKAVQHFYSVKLQ GKVP  
 MHKL FLEM LEAKV

>Q6Q6F6\_BRARE

MSSRERRSDLYIKAEPSSPEGGGGGGGRTSPGGASSDSSQSGGGGSRGEGAGRYSPLYTPALRCHFKE  
 EGADGAEESTGSGGGRCKYALSTLPKRLCLVCGDVASGYHYGVASCEACKAFFKRTIQGNIEYSPASN  
 ECEITKRRRKACQACRFKCLKVGMLKEGVRLDRVRGGRQKYKRRPEVENATYQSAPIPLRKEGEGKSSS  
 IIVSHLLVAEPEKLFAMPDPLQPDTAQRTLTLCLDLADRELVIIGWAKHIPGFSLSLADQMSVLQSVW  
 LEVLVLGVAYRSLGCEDEVVFAEDFVLDEEMSRVAGLTELNAAISQLARRFRALQLDREEFVMLKAIALT  
 NSDSVYIEDMEAVQKLRDLLHQALLELEVQRRPDDPQRAGRLLLTLP LLRQTAGRALTTFYSIKTRGGVP  
 MHKL FLEM LEAMMDSF

>Q6QMY5\_CANFA

MSSQVVGIEPLYIKAEPASPDSPKGSSETETEPVALAPGPAPTRCLPGHKEEEDGEGAGPGEQGGGKLV  
 LSSLPKRLCLVCGDVASGYHYGVASCEACKAFFKRTIQGSI EYSPASNECEITKRRRKACQACRFKCL  
 RVGMLKEGVRLDRVRGGRQKYKRRPEVDPLPFGSFPAGPLAVAGGPRKTAPVNALVSHLLVVEPEKLYA  
 MPDPAGPDGHLPAVATLCLDFDREIVVTISWAKSIPGFSSLSLSDQMSVLQSVWMEVLVLGVAQRSLPLQ  
 DELAFAEDLVLDEEGARAAGLGELGAVLLQLVRRQLALRLEEEYVLLKALALANSDSVHIEDAEAVEQL  
 REALHEALLEYEAGRAGPGGGAERRRAGRLLLTLP LLRQTAGKVLAHFYGVKLEGKVP MHKL FLEM LEAM  
 MD

>Q9VSE9\_DROME

MSDGVSI LHIKQEVDTPSASCFS PSSKSTATQSGTNGLKSSPSVSPERQLCSSTTSLSCDLHNVSLSNDG  
 DSLKSGTSGGNGGGGGGTSGGNATNASAGAGSGSVRDELRRCLVCGDVASGFHYGVASCEACKAFFK  
 RTIQGNIEYTCPANNECEINKRRRKACQACRFQKCLLMGMLKEGVRLDRVRGGRQKYRRNPVNSYQTMQ  
 LLYQSNTTSLCDVKILEVLNSYEPDALSVQTPPPQVHTTSITNDEASSSSSGSIKLESSVTPNGTCIFQN  
 NNNNDPNEILSVLSDIYDKELVSVIGWAKQIPGFIDLPLNDQMKLLQVSWAEILTQLTFRSLPFNGKLC  
 FATDVWMDEHLAKECGYTEFYHCVQIAQRMERISPRREEYLLKALLLANCDILLDDQSSLRAFRDITL  
 NSLNDVVYLLRHSSAVSHQQQLLLLLLPSLRQADDILRRFWRGIARDEVITMKKL FLEM LEPLAR

>Q6AX97\_XENLA

MSSRDRRDLCKIAEPTPESIGRRSPSGSSDSSGHGPDPPGPRCCRDEEQDDVSGRGKYVLNSIPKRLC  
 LVCGDVASGYHYGVASCEACKAFFKRTIQGNIEYSPASNECEITKRRRKACQACRFKCLRVGMLKEGV  
 RLDRVRGGRQKYKRRPDGDILQYSSGGQAQQASATVVKKQTPVNAVVSHELLVAEPDKLFAMPDPALPDGD  
 LKYMSTLCLADREIVIIISWAKNIPGFSSLSLSDQMSLLQSVWMEVLLLGVVFRSLPYEDEVVFAEDFV  
 LDEESSRSGRLTDLCSCVLHLVRKYRTL RVEKEEYVMLKALTLTNSDSVHIEDPDAVLRRLDALQEALSE

YESGRHPEEPCRDGKLLLTPLLRQTAGRVLQHFHALREEGAVPMHKLFLLEMLEAMMD

#### (4) 23 NR4

>NR4A1\_HUMAN

MPCIQAQYGT PAPS PGP RDHLASDPLTPEFIKPTMDLASPEAAPAAP TALPSFSTFMDGYTGEFD TFLYQ  
 LPGTVQPCSSASSASSTSSSSATSPASASFKFEDFQVYGCYPGPLSGPVDEALSSSGSDYYSGPCSAPS  
 PSTPSFQPPQLSPWDGSFGHFSPSQTYEGLRAWTEQLPKASGPPQPPAFFSFSPPTGPSPSLAQSPLKLF  
 PSQATHQLGEGESYSMPTAF PGLAP TSPHLEGG ILDTPVTSTKARSGAPGGSEGRCAVCGDNASCQHYG  
 VRTCEGCKGFFKRTVQKNAKYICLANKDCPVDKRRRNRCQFCRFQKCLAVGMVKEVVRTDSLKGRRGRLP  
 SKPKQPPDASPANLLTSLVRAHLDSGPSTAKLDYSKFQELVLPHPFGKEDAGDVQQFYDLLSGSLEVIRKW  
 AEKIPGFAELSPADQDLLLES AFLELFILRLAYRSKPGEGKLI FCSGLVLHRLQCARGFGDWIDSILAFS  
 RSLHSLLDVPAFACLSALV LITDRHGLQEPRRVEELQNRIASCLKEHVAAVAGEPQPASCLSRLLGKLP  
 ELRTLCTQGLQRIFYLKLEDLVPPPIIDKIFMDTLPF

>Q6IBU8\_HUMAN

MPCIQAQYGT PAPS PGP RDHLASDPLTPEFIKPTMDLASPEAAPAAP TALPSFSTFMDGYTGEFD TFLYQ  
 LPGTVQPCSSASSASSTSSSSATSPASASFKFEDFQVYGCYPGPLSGPVDEALSSSGSDYYSGPCSAPS  
 PSTPSFQPPQLSPWDGSFGHFSPSQTYEGLRAWTEQLPKASGPPQPPAFFSFSPPTGPSPSLAQSPLKLF  
 PSQATHQLGEGESYSMPTAF PGLAP TSPHLEGG ILDTPVTSTKARSGAPGGSEGRCAVCGDNASCQHYG  
 VRTCEGCKGFFKRTVQKNAKYICLANKDCPVDKRRRNRCQFCRFQKCLAVGMVKEVVRTDSLKGRRGRLP  
 SKPKQPPDASPANLLTSLVRAHLDSGPSTAKLDYSKFQELVLPHPFGKEDAGDVQQFYDLLSGSLEVIRKW  
 AEKIPGFAELSPADQDLLLES AFLELFILRLAYRSKPGEGKLI FCSGLVLHRLQCARGFGDWIDSILAFS  
 RSLHSLLDVPAFACLSALV LITDRHGLQEPRRVEELQNRIASCLKEHVAAVAGEPQPASCLSRLLGKLP  
 ELRTLCTQGLQRIFYLKLEDLVPPPIIDKIFMDTLPF

>Q8N3V2\_HUMAN

MPCIQAQYGT PAPS PGP RDHLASDPLTPEFIKPTMDLASPEAAPAAP TALPSFSTFMDGYTGEFD TFLYQ  
 LPGTVQPCSSASSASSTSSSSATSPASASFKFEDFQVYGCYPGPRSGPVDEALSSSGSDYYSGPCSAPS  
 PSTPSFQPPQLSPWDGSFGHSSPSQTYEGLRAWTEQLPKASGPPQPPAFFSFSPPTGPSPSLAQSPLKLF  
 PSQATHQLGEGESYSMPTAF PGLAP TSPHLEGG ILDTPVTSTKARSGAPGGSEGRCAVCGDNASCQHYG  
 VRTCEGCKGFFKRTVQKNAKYICLANKDCPVDKRRRNRCQFCRFQKCLAVGMVKEVVRTDSLKGRRGRLP  
 SKPKQPPDASPANLLTSLVRAHLDSGPSTAKLDYSKFQELVLPHPFGKEDAGDVQQFYDLLSGSLEVIRKW  
 AEKIPGFAELSPADQDLLLES AFLELFILRLAYRSKPGEGKLI FCSGLVLHRLQCARGFGDWIDSILAFS  
 RSLHSLLDVPAFACLSALV LITDRHGLQEPRRVEELQNRIASCLKEHVAAVAGEPQPASCLSRLLGKLP  
 ELRTLCTQGLQRIFYLKLEDLVPPPIIDKIFMDTLPF

>Q5RBB0\_PONPY

MPCIQAQYGT PAPS PGP RDHLASDPLTPEFIKPTMDLASPEAAPAAP TALPSFSTFMDGYTGEFD TFLYQ  
 LPGTVQPCSSASSASSTSSSSATSPASASFKFEDFQVYGCYPGPLSGPVDEALSSSGSDYYSGPCSAPS  
 PSTPSFQPPQLSPWDGSFGHFSPSQTYEGLRAWTEQLPKASGPPQPPAFFSFSPPTGPSPSLAQSPLKLF  
 PSQATHQLGEGESYSMPTAF PGLAS TSPHLEGG ILDAPVTSTKARSGAPGGSEGRCAVCGDNASCQHYG  
 VRTCEGCKGFFKRTVQKNAKYICLANKDCPVDKRRRNRCQFCRFQKCLAVGMVKEVVRTDSLGRRRGRLP  
 SKPKQPPDASPANLLTSLVRAHLDSGPSTAKLDYSKFQELVLPFRFGKEDAGDVQQFYDLLSGSLEVIRKW  
 AEKIPGFAELSPADQDLLLES AFLELFILRLAYRSKPGEGKLI FCSGLVLHRLQCARGFGDWIDSILAFS

RSLHSLVVDVPAFACLSALVLITDRHGLQEPRRVEELQNRIASCLKEHVAAVAGEPQPASCLSRLLGKLP  
ELRTLCTQGLQRIFYLKLEDLVPPPIIDKIFMDTLPF

>NR4A1\_CANFA

MPCIQAQYGTTPAPSPGPRDHLASDPLTPELSKPTMDLASPEAAPTAPTALPSFSTFMDGYTGEFDTFLYQ  
LPGTAQPCSSASSASSTSSSSATSPASASFKFEDFQVYGCYPGPLSGPLDETLSSSGSDYYGSPCSAPS  
PSTPSFQPPQLSPWDGSGFSPSQTIEGLRAWTEQLPKASGHPQPPAFFSFSPTGSPSLAQSPKLF  
PSQATCQLGERESYSISTAFPGLAPTSPLHDGPGMLDAPVPSAKARSGAPSGSEGRCAVCGDNASCQHYG  
VRTCEGCKGFFKRTVQKNAKYICLANKDCPVDKRRRNRCQFCRFQKCLAVGMVKEVVRTDSLKGRRGRLP  
SKPKQPPDASPANLLTSLVRAHLDSGPSTAKLDYSKFQELVLPHPGKEDAGDVQQFYDLLSGSLEVIRKW  
AEKIPGFAELSPGDQLLLESFAFLELFILRLAYRSKPAEGKLIFCGLVHLHRLQCARGFGDWIDSILAFS  
RSLHGLVVDVPAFACLSALVLITDRHGLQEPRRVEELQNRIASCLKEHVS AVAGEPQPASCLSRLLGKLP  
ELRTLCTQGLQRIFYLKLEDLVPPPIVDKIFMDTLPF

>NR4A1\_MOUSE

MPCIQAQYGTTPATSPGPRDHLTGDPALALEFGKPTMDLASPETAPAAPATLPSFSTFMDGYTGEFDTFLYQ  
LPGTTQPCSSACSSASSTSSSSSSATSPASASFKFEDFQVYGCYPTLSGPLDETLSSSGSEYYGSPCSA  
PSPSTPNFQPSQLSPWDGSGHFSQTYEGLWAWTEQLPKASSGPPPPPTFFSFSPTGSPSLAQSSL  
KLFPPPATHQLGEGESYMPAAFPGLAPTSNDRDTSGLDAPVTSTKSRSGASGGSEGRCAVCGDNASCQ  
HYGVRTCEGCKGFFKRTVQKSAYKICLANKDCPVDKRRRNRCQFCRFQKCLAVGMVKEVVRTDSLKGRRG  
RLPSKPKQPPDASPTNLLTSLIRAHLDSDGPSTAKLDYSKFQELVLPFRFGKEDAGDVQQFYDLLSGSLDVI  
RKWAEKIPGFIELCPGDQLLLESFAFLELFILRLAYRSKPGEGKLIFCGLVHLHRLQCARGFGDWIDNIL  
AFSRLHSLGVDVPAFACLSALVLITDRHGLQDPRRVEELQNRIASCLKEHMATVAGDPQPASCLSRLLG  
KLPELRTLCTQGLQRIFCLKLEDLVPPPIVDKIFMDTLPF

>NR4A2\_MOUSE

MPCVQAQYGSSPQGASPASQSYSYHSSGEYSSDFLTPEFVKFSMDLTNTEITATTSLSFSTFMDNYSTG  
YDVKPPCLYQMPLSGQQSSIKVEDIQMHNYQQHSHLPPQSEEMPHSGSVYYKPSPPPTPSTPSFQVQHS  
PMWDDPGSLHNFHQNYVATTHMIEQRKTPVSRLSLSFSFKQSPPGTPVSSCQMRFDGPLHVPMPNPEPAGSH  
HVVDGQTFAVPNPIRKPASMGFPGLQIGHASQLLDTQVPSPPSRGSPSNEGLCAVCGDNAACQHYGVRTC  
EGCKGFFKRTVQKNAKYVCLANKNCPVDKRRRNRCQYCRFQKCLAVGMVKEVVRTDSLKGRRGRRLPSKPK  
SPQDPSPPSPVSLISALVRAHVDSNPAMTSLDYSRFQANPDYQMSGDDTQHIQQFYDLLTGSMEIIRGW  
AEKIPGFADLPKADQLLLESFAFLELFVLRRLAYRSNPVEGKLIFCNGVVLHRLQCVRGFGGEWIDSIVEFS  
SNLQNMNIDISAFSCIAALAMVTERHGLKEPKRVEELQNKIVNCLKDHVTFNNGGLNRPNYLSKLLGKLP  
ELRTLCTQGLQRIFYLKLEDLVPPPIIDKIFLDTLPF

>NR4A2\_HUMAN

MPCVQAQYGSSPQGASPASQSYSYHSSGEYSSDFLTPEFVKFSMDLTNTEITATTSLSFSTFMDNYSTG  
YDVKPPCLYQMPLSGQQSSIKVEDIQMHNYQQHSHLPPQSEEMPHSGSVYYKPSPPPTPTTPGFQVQHS  
PMWDDPGSLHNFHQNYVATTHMIEQRKTPVSRLSLSFSFKQSPPGTPVSSCQMRFDGPLHVPMPNPEPAGSH  
HVVDGQTFAVPNPIRKPASMGFPGLQIGHASQLLDTQVPSPPSRGSPSNEGLCAVCGDNAACQHYGVRTC  
EGCKGFFKRTVQKNAKYVCLANKNCPVDKRRRNRCQYCRFQKCLAVGMVKEVVRTDSLKGRRGRRLPSKPK  
SPQEPSPPSPVSLISALVRAHVDSNPAMTSLDYSRFQANPDYQMSGDDTQHIQQFYDLLTGSMEIIRGW  
AEKIPGFADLPKADQLLLESFAFLELFVLRRLAYRSNPVEGKLIFCNGVVLHRLQCVRGFGGEWIDSIVEFS

SNLQNMNIDISAFSCIAALAMVTERHGLKEPKRVEELQNKIVNCLKDHVTFNNGGLNRPNYLSKLLGKLP  
ELRTLCTQGLQRIFYLKLEDLVPPPAIIDKLFLDTLPF

>NR4A2\_RAT

MPCVQAQYGSSPQGASPASQSYSHSSGEYSSDFLTPEFVKFSMDLTNTEITATTSLPSFSTFMDNYSTG  
YDVKPPCLYQMPLSGQQSSIKVEDIQMHNYQQHSHLPPQSEEMPHSGSVYKPSPPPTPSTPGFQVQHS  
PMWDDPGSLHNFHQNYVATTHMIEQRKTPVSRLSLFSFKQSRPGTPVSSCQMRFDGPLHVPMNPEPAGSH  
HVVDGQTFVAVPNPIRKPASMGFPGLQIGHASQLLDTQVPSPPSRGSPSNEGLCAVCGDNAACQHYGVRTC  
EGCKGFFKRTVQKNAKYVCLANKNCPVDKRRRNRCQYCRFQKCLAVGMVKEVVRTDSLKGRRGRLPSKPK  
SPQDPSPPSPVSLISALVRAHVDSNPAMTSLDYSRFQANPDYQMSGDDTQHIQQFYDLLTGSMEIIRGW  
AEKIPGFADLPKADQDLLFESAFLELFLVRLRAYRSNPVEGKLIFCNGVVLHRLQCVRGFGEWIDSDIVEFS  
SNLQNMNIDISAFSCIAALAMVTERHGLKEPKRVEELQNKIVNCLKDHVTFNNGGLNRPNYLSKLLGKLP  
ELRTLCTQGLQRIFYLKLEDLVPPPAIIDKLFLDTLPF

>Q5R5Y4\_PONPY

MPCVQAQYGSSPQGASPASQGYSHSSGEYSSDFLTPEFVKFSMDLTNTEITATTSLPSFSTFMDNYSTG  
YDVKPPCLYQMPLSGQQSSIKVEDIQMHNYQQHSHLPPQSEEMPHSGSVYKPSPPPTPTTTPGFQVQHS  
PMWDDPGSLHNFHQNYVATTHMIEQRKTPVSRLSLFSFKQSPPGTPVSSCQMRFDGPLHVPMNPEPAGSH  
HVVDGQTFVAVPNPIRKPASMGFPGLQIGHASQLLDTQVPSPPSRGSPSNEGLCAVCGDNAACQHYGVRTC  
EGCKGFFKRTVQKNAKYVCLANKNCPVDKRRRNRCQYCRFQKCLAVGMVKEVVRTDSLKGRRGRLPSKPK  
SPQEPSPPSPVSLISALVRAHVDSNPAMTSLDYSRFQANPDYQMSGDDTQHIQQFYDLLTGSMEIIRGW  
AEKIPGFADLPKADQDLLFESAFLELFLVRLRAYRSNPVEGKLIFCNGVVLHRLQCVRGFGEWIDSDIVEFS  
SNLQNMNIDISAFSCIAALAMVTERHWLKEPKRVEELQNKIVNCLKDHVTFNNGGLNRPNYLSKLLGKLP  
ELRTLCTQGLQRIFYLKLEDLVPPPAIIDKLFLDTLPF

>NR4A1\_RAT

MPCIQAQYGT PATSPGPRDHLTGDP LAL EFSKPTMDLASPETAPTAPATLPSFSTFMDGGYTGEFDTFLY  
QLPGTAQPCSSASSTSSSSSATSPASASFKEFEDQVYGCYPGT LSGPLDETLSSSGSDYYGSPCSAPSP  
PTPNFQPSQLSPWDGSFGHFSQTYEGLRVWTEQLPKASGPPPPPTFFSFSPTGSPSLAQSS LKLF  
APATHQLGEGESYVPAAFPGLAPTS PNC DTS GILDA PVTSTKARSGSSGGSEGRCAVCGDNASCQHYGV  
RTCEGCKGFFKRTVQKSAKYICLANKDCPVDKRRRNRCQYCRFQKCLAVGMVKEVVRTDSLKGRRGRLPS  
KPKQPPDASPTNLLTSLIRAHLDSPNTAKLDYSKFQELVLPFRFGKEDAGDVQQFYDLLSGSLDVIRKWA  
EKIPGFIELSPGDQLLLES AFLEL FILRLAYRSKPGEGKLIFCSGLVLHRLQCARGFGDWIDNILAFSR  
SLHSLGVDVPAFACLSALVLITDRHGLQDPRRVEELQNR IASCLKEHMAAVAGDPQPASCLSRLLGKLP  
LRTLCTQGLQRIFCLKLEDLVPPPIVDKIFMDTSLF

>NR4A3\_MOUSE

MPCVQAQYSPSPGGSTYATQTYGSEYTT EIMNPDYTKLTMDLGSTGIMATATTSLPSFSTFMEGYPS SCE  
LKPSCLYQMPPSGPRPLIKMEEGREHGYHHHHHHHHHHHHHHQQQPSIPPPSGPEDEVLPSTSMYFKQSP  
PSTPTTTPGFPPQAGALWDELPSAPGCIAPG PLLDPQMKAVPPMAAAARFPIFFKPSPPHPAPSPAGGH  
HLGYDPTAAAALSPLGAAAAAGSQAAL EGHYPGLAKRTATLTFPPLGLTASPTASSLLGESPSLPS  
PPNRSSSSGEGTCAVCGDNAACQHYGVRTC EGCKGFFKRTVQKNAKYVCLANKNCPVDKRRRNRCQYCRF  
QKCLSVGMVKEVVRTDSLKGRRGRLPSKPKSPLQQEPSQSPSPSPPICMMNALVRALTDATPRDL DYSRY  
CPTDQATAGTDAEHVQQFYNNLTASIDVSRSWAEKIPGFTDLPKEDQTL LIESAFLELFLVRLRSIRSNTA

EDKFVFCNGLVLHRLQCLRGFGEWLDSIKDFSLNLQSLNLDIQALACLSALSMITERHGLKEPKRVEELC  
TKITSSLKDHQKRGQALEPSEPKVLRALVELRKICTQGLQRIFYLKLEDLVPPPSVIDKLFLDTLPF

>NR4A3\_RAT

MPCVQAQYSPSPPGSTYATQTYGSEYTTTEIMNPDYAKLTMDLGSTGIMATATTSLSFSTFMEGYPSSCE  
LKPSCLYQMPPSGPRPLIKMEEGREHGYHHHHHHHHHHHHHHHQQQPSIPPPSGPEDEVLPSTSMYFKQS  
PPSTPTTTPGFPPQAGALWDELPSAPGCIAPGPLLDPMKAVPPMAAAARFPIFFKPSPPHPPAPSPAGG  
HHLGYDPTAAAALSPLGAAAAAGSQAAALEGHPYGLPLAKRTATLTFPPLGLTASPTASSLLGESPSLP  
SPPNRSSSSGEGTCAVCGDNAACQHYGVRTCEGCKGFFKRTVQKNAKYVCLANKNCPVDKRRRNRCQYCR  
FQKCLSVGMVKEVVRTDSLKRRRRLPSKPKSPLQEQPSQSPSPSPICMMNALVRALTDATPRDLDSR  
YCPTDQATAGTDAEHVQQFYNNLTASIDVSRSWAEKIPGFTDLPKEDQTLTLLIESAFLELFLVLRLSIRSNT  
AEDKFVFCNGLVLHRLQCLRGFGEWLDSIKDFSLNLQSLNLDIQALACLSALSMITERHGLKEPKRVEEL  
CNKITSSLKDHQKRGQALEPSEPKVLRALVELRKICTQGLQRIFYLKLEDLVSPPSVIDKLFLDTLPF

>Q6NXU0\_HUMAN

MDNYSTGYDVKPPCLYQMPLSGQQSSIKVEDIQMHNYQQHSHLPPQSEEMPHSGSVYKPSPTPTTP  
GFQVQHSPMWDGSLHNFHQNYVATTHMIEQRKTPVSRSLSLFSFKQSPPGTPVSSCQMRFDGLHVPMN  
PEPAGSHHVVDGQTFVAVNPPIRKPASMGFPGQLIGHASQLLDTQVSPSPSRGSPSNEGLCAVCGDNAACQ  
HYGVRTCEGCKGFFKRTVQKNAKYVCLANKNCPVDKRRRNRCQYCRFQKCLAVGMVKEVVRTDSLKRRR  
RLPSKPKSPQEQSPSPSPVSLISALVRAHVDSNPAMTSLDYSRFQANPDYQMSGDDTQHIQQFYDLLTGS  
MEIIRGWAEKIPGFADLPKADQDLLFESAFLELFLVLRLAYRSNPVEGKLIFCNGVVLHRLQCVRGFGEWI  
DSIVEFSSNLQNMNIDISAFSCIAALAMVTERHGLKEPKRVEELQNKIVNCLKDHVTFNNGGLNRPNYLS  
KLLGKLPRLTCTQGLQRIFYLKLEDLVPPPAIIDKLFLDTLPF

>NR4A3\_HUMAN

MPCVQAQYSPSPPGSSYAAQTYSSSEYTTTEIMNPDYTKLTMDLGSTEITATATTSLSFSTFVEGYSSNYE  
LKPSCLYQMQRPLIKVEEGRAPSYHHHHHHHHHHHHHHHQQHQQPSIPPASSPEDEVLPSTSMYFKQSPP  
STPTTTPAFPPQAGALWDEALPSAPGCIAPGPLLDPPMKAVPTVAGARFPLFHFKPSPPHPPAPSPAGGHH  
LGYDPTAAAALSPLGAAAAAGSQAAALEGHPYGLPLAKRAAPLAFPPPLGLTPSPTASSLLGESPSLPSP  
PSRSSSSGEGTCAVCGDNAACQHYGVRTCEGCKGFFKRTVQKNAKYVCLANKNCPVDKRRRNRCQYCRFQ  
KCLSVGMVKEVVRTDSLKRRRRLPSKPKSPLQEQPSQSPSPSPICMMNALVRALTDSTPRDLDSRYC  
PTDQAAAGTDAEHVQQFYNNLTASIDVSRSWAEKIPGFTDLPKEDQTLTLLIESAFLELFLVLRLSIRSNTAE  
DKFVFCNGLVLHRLQCLRGFGEWLDSIKDFSLNLQSLNLDIQALACLSALSMITERHGLKEPKRVEELCN  
KITSSLKDHQSKGQALEPTESKVLGALVELRKICTLGLQRIFYLKLEDLVSPPSIIDKLFLDTLPF

>NR4A2\_XENLA

MPCIQAQHGSLSQCAGPCDNYVPDILNSEFGKFTMDLVNSEIAASTSLPSFSTFMDGYTGFEFAFLYQIP  
SSNQSSSLKVEEFQVFGCYPGSFTNQLDETMSSSGSDYYSGPSIPSPSTPGFQNPQLPTWECSYGAYSP  
TQNYDNMRHWTEQQKNSISQQTFFSFGTPAHSPNMAANPLKIPATHRLDQQLVDTDVFALAQNSSAGFP  
AVPLGQAPGVLDSSVLLDPSLSPSKTRSPSSNEGRCAVCGDNASCQHYGVRTCEGCKGFFKRTVQKNAKY  
ICLANKDCPVDKRRRNRCQYCRFQKCLVGMVKEVVRTDSLKRRRRLPSKPKQIAESSPVDLINSLVRA  
HIDSIPSSSKLDYSKFQETVPLQLEKESSVDVQFYDLLSGSLEVIRKWAEKIQGFVDLPKEDQDLLLES  
AFLELFLRLAYRSRPEEGKLIFCNGVVLHRTQCVRGFGEWIDSIEFESHSLQRMNIDVPSFSCLSALVI  
VTDRHGLKEPKKVEELQSQIINCLKEHIPSSMNEQNRPNCLSKLLGKLPRLTCTQGLQRIFYLKLEDL



VPPPIVDKIFMDTLPF

>Q7T0V3\_XENLA

MPCIQAQYGSLSQCAGPCDNYVPDILNSEFGKFTMDLVNSEIAASTSLPSFSTFMDGYTGEFDAFLYQIP  
 SSNQSSSLKVEEFQVFGCYPGSFTNQVDETMSSSGSDYYGSPCSIPSPSTPGFQNPQLPTWECSYGAYSP  
 NQNYDNMRHWTEQQKNSISQQTFFSFGTPAHSPNVAANPLKMAPATHRLDQQIVDADVFAHNSSSGFP  
 AIPLGQAHGVLDSVLLDSPSPSKTSLSPSSNEGRCAVCGDNASCQHYGVRTCEGCKGFFKRTVQKNAKY  
 ICLANKDCPVDKRRRNRQCFCRFQKCLAVGMVKEVVRTDNLKGRRGRRLPSKPKQIAESSPVSLINSLVRA  
 HIDSIPSSSKLDYSKFQETVPVQLEKESSVDVQQFYDLLSGSLEVIRKWAEKIQGFVDLPKEDQDLLLES  
 AFLELFILRLAYRSRPEEEKLIFCNGVVLHRTQCVRGFGEWIDSIEFESHNLQRTNIDVPSFSCLSALVI  
 ITDRHGLKEPKKVEELQSRIINCLKEHAPSSMNEQNRPNCLSKLLGKLPRLTLCTQGLQRIFYLKLEDL  
 VPPPIVDKIFMDTLPF

>Q6DH08\_BRARE

MPCVQAQYGTSPPGASPASQSYSYNTTGEYNCDFLTPEFVKFSMDLTNAEIAVTSSLPSFSTFVDITYSSN  
 YDVKPPCLYQMAHSGDQLSIKVEEIPAAGYHQQQHHQPHQAEESIPHTGAIYYKPSNPISQSPSYPTAP  
 HHTWEDTGLSHSFHQNYLATSHIMDQQRKNAMSRLFSFKQSPVDTPMPSCQMRFDGSLHVSMPDPTAHRA  
 LDSFALPAPPRKQHGVLGSHSLNVGHPLLESPVASPQARGSPSSEGLCAVCGDNAACQHYGVRTCEGCKG  
 FFKRTVQKNAKYVCLANKNCPVDKRRRNRQCFCRFQKCLVGMVKEVVRTASLKGRRGRRLPSKPKSPQDI  
 PVSFTPVNLLNALVRAHIDSNPMSMARLDYSKFQTSPEYHSGGDESLHIQQFYDLLTASMSIIRGWAEKIP  
 GFTELKCDQELLFESAFLELFVLRRLAYRSNLPEDKLIFCNGMVLHKLQCVRGFGEWIDSIVEFSSNLQS  
 MSLDVSAFSCIAALTIVTERHGLKEPKKAEELQNKLINCLKQVSCSGELSKLLEKLPVRLCTQGLQR  
 IFYLKLEDLVPTPAIDKLFHDTLPF

>Q6GMG3\_BRARE

MTCVQSQHGVQSYESSLFSSEFLNPDFTSRLAMDVTEQREQLSAPSLPSITSLVGGYVGEFDTYSCQIAT  
 GAASTCVGSTSGQLDSFKLDDLQVYGCYPGTFALSYLDETLSSSGGNSFCGSPASAPSPSTPGYQHMSAW  
 DSTFGPCSPDEGCWGSEKPLNQAASFFTFGHVTADELSPLGQMOSQIPDQDPFSHTPQHGSPLPFSPLSL  
 EQGSRDGSGLMDGHLSPKVRSPGTGNEGRCAVCGDNASCQHYGVRTCEGCKGFFKRTVQKNAKYVCLANKD  
 CPVDKRRRNRQCFCRFQKCLAVGMVKEVVRTDSLKGRRGRRLPSKPKAVQDSVSVSSPVNIIASLVTAHID  
 SNPASANLDYSKYQESTSGLPEKEDANDIQQFYDLLTGSMVIRKWAGSIPGFSAFCKEDQELLLESFAV  
 ELFILRLAYRSNPETDKLIFCNGVVLHRTQCVRSFGDWIDSIMEFSQSLHRLNLDISAFSCLATLVIITD  
 RHGLKEPKRIEDFQNRLLITCLRHDVSTSALEVGRPNLSRLLSKLPRLTLCTQGLQRIFYLKLEDLVPP  
 PPIVDKIFMDTLPF

>Q8INU7\_DROME

MDEDCFPPLSGGWSASPPAPSQLQLLHTLQSQAQMSHPNSSNNSNAGNSHNNSGGYNYHGHFNAINAS  
 ANLSPSSSASSLYEYNGVSAADNFYGOQQQQQQSYQQHNYNSHNGERYSLPTFPITISELAAATAAVEAA  
 AAATVSSPSVGGPPVRRASLPVQRTVSPAGSTAQS PKLAKITLNQRHSHAHALQNSAPNSAASSPA  
 SADLQAGRLLQAPSQCAVCGDTAACQHYGVRTCEGCKGFFKRTVQKGSKYVCLADKNCVPDKRRRNRQC  
 FCRFQKCLVGMVKEVVRTDSLKGRRGRRLPSKPKSPQESPPSPPI SLITALVRSHVDTPDPSCLDYSHY  
 EEQSMSEADKVQQFYQLLTSVDVIKQFAEKIPGYFDLLPEDQELLFQSASLELFVLRRLAYRARIDDTKL  
 IFCNGTVLHRTQCLRSFGEWLNDIMEFSRSLHNLEIDISAFACLALTLITERHGLREPKKVEQLQMKI  
 GSLRDHVTYNAEAQKQHYFSRLLGKLPRLSLVQGLQRIFYLKLEDLVPAPALIENMFVTTLPF

>Q9R1W4\_MOUSE

MDNYSTGYDVKPPCLYQMPLSGQQSSIKVEDIQMHNYQQHSHLPPQSEEMMPHSGSVYYKPSSPPTPSTP  
 SFQVQHSPMWDGSLHNFHQNYVATTHMIEQRKTPVSRLSLFSFKQSPPGTPVSSCQMRFDGFLHVPMN  
 PEPAGSHHVVDGQTFVAVNPPIRKPASMGFPGLQIGHASQLLDTQVSPSPSRGSPSNEGLCAVCGDNAACQ  
 HYGVRTCEGCKGFFKRTVQKNAKYVCLANKNCPVDKRRRNRCQYCRFQKCLAVGMVKEVVRTDSLKGRRG  
 RLPSKPKSPQDPSPPSPVSLISALVRAHVDSNPAMTSLDYSRFQANPDYQMSGDDTQHIQQFYDLLTGS  
 MEIIRGWAEKIPGFADLPKADQDLLFESAFLELFLVRLRAYRI

>O97727\_PIG

MPCVQAQYSPSPGSSYAAQTYGSEYTTIMNPDYTKLTMDLGSTEITATATATSLPSFSTFMEGYSSNYE  
 LKPSCLYQMOPSGPRPLIKMEEGRAHGYHHHHHDHHHHHHHQQQQQQQPPPPQQQPSIPPPSGPEDEVL  
 PSTSMYFKQSPSPPTTPVFPQQAGALWEDALPSAQGCIAFGPLLDPPMKAVPTVAGARFPLFHFKPSPP  
 HPPAPSPAGHHLYDPTAAAALGLPLGAAAAAAAAAAGSQAALLEGHPYGLPLAKRAAALAFSPLGLTT  
 SPTTSSLLGESPSLSPPNRSTASGEGTCAVCGDNAACQHYGVRTCEGCKGFFKRTVQKNAKYVCLANKN  
 CPVDKRRRNRCQYCRFQKCLSVGMVKEVVRTDSLKGRRGRLPSKPKSPLQQEPSQSPSPSPVCMNALV  
 RALTDSTPRDLDSRGHACGIWKFPG

>Q61JK3\_CAEBR

MMSKRTASKLEKPSSTLAALEEQLRASGVIINTEFASLQDTSQANVVPKPEVKVKVETIPEEFEQPSSSA  
 PSSSNQRALPSQSQIQPSVAPNPEMNASIAHIKSELDPMAFQMPNDLIFGAPHYPFSLTHDFMGAPNA  
 LMPPFTSPFYQHFVPAEARRNSQGNTSSSNNTGGTSPSPHSNSLPTSPPLHGFRLRSFLNHDNLQTPPT  
 PFGIQDEVLDADKMCVACNDRAVCLHYGARTCEGCKGFFKRTVQKNSKYTCAGNKNCPIDKRYRSRCQYC  
 RFQKCLEVGMVKEIVRGGSLSGRRGRLSSKTKLARSVDQSPPLPLLALMGKAIEDNTNMTVTRHFLAPF  
 GEDSAVSILHCEYIATRKLMLAMPQICEIPEPDFRILLARSFFPIMAIRCANRCANNTEIMFESGELFM  
 LNAFPICFQQILRFMINKAQNFSSLVEWEPQAFASFIALQFLSGNTEQNLLGLSNKVLVDTVQSTIINAL  
 KDHCSGSQNKLAKIVRLTDEFDFVHTMGIQVLDSEMYPSTRFPPEEFQHLLISLTRAPLRATDTPACGSPVV  
 PSTSALFAFQMGSTAF

### (5) 33 NR5

>NR5A2\_HUMAN

MSSNSDTGDLQESLKHGLTPIGAGLPDRHGSPIPARGRLVMLPKVETEALGLARSHGEQGQMPENMQVSQ  
 FKMVNYSYDEDELEELCPVCGDKVSGYHYGLLTCECKGFFKRTVQNNKRYTCIENQNCQIDKTQRKRCYPY  
 CRFQKCLSVGMKLEAVRADRMGRGRNKFGPMYKRDRALKQQKKALIRANGLKLEAMSQVIQAMPDLTIS  
 SAIQNIHSASKGLPLNHAALPPTDYDRSPFVTSPISMTMPHGSQGYQTYGHFSPRAIKSEYPDPYTSS  
 PESIMGYSYMDSYQTSSPASIPLHILELLKCEPDEPQVQAKIMAYLQQEQANRSKHEKLSTFGLMCKMAD  
 QTLFSIVEWARSSIFFRELKVDDQMKLLQNCWSELLILDHIYRQVVHGKEGSIFLVTGQQVDYSIIASQA  
 GATLNNLMSHAQELVAKLRSLQFDQREFVCLKFLVLSLDVKNLENFQLVEGVQEQVNAALLDYTCNYP  
 QQTEKFGQLLLRLPEIRAIISMQAEEYLYYKHLNGDVPYNNLLIEMLHAKRA

>Q9UEC0\_HUMAN

MSSNSDTGDLQESLKHGLTPIGAGLPDRHGSPIPARGRLVMLPKVETEALGLARSHGEQGQMPENMQVSQ  
 FKMVNYSYDEDELEELCPVCGDKVSGYHYGLLTCECKGFFKRTVQNNKRYTCIENQNCQIDKTQRKRCYPY  
 CRFQKCLSVGMKLEAVRADRMGRGRNKFGPMYKRDRALKQQKKALIRANGLKLEAMSQVIQAMPDLTIS

SAIQNIHSASKGLPLNHAALPPTDYDRSPFVTSPISMTMPHGSLOQGYQTYGHFSPRAIKSEYPDSYTSS  
 PESIMGYSYMDSYQTSSPASIPHLILELLKCEPDEPQVQAKIMAYLQQEQANRSKHEKLSTFGLMCKMAD  
 QTLFSIVEWARSSIFFRELKVDDQMKLLQNCWSELLILDHIYRQVVHGKEGSI FLVTGQQVDYSIIASQA  
 GATLNNLMSHAQELVAKLRSLQFDQREFVCLKFLVLFSLDVKNLENFQLVVEGVQEQVNAALLDYTCNYP  
 QQTEKFGQLLLRLPEIRAI SMQAEEYLYYKHLNGDVPYNNLLIEMLHAKRA

>Q9QWM0\_RAT

MSASSITGDFQDFLKHGLPAIGAGLPDRHRRPIPARSRLVMLPKVETEASGLVRSHGEGQMPENMQVSQ  
 FKMVNYSYDEDELEELCPVCGDKVSGYHYGLLTCECKGFFKRTVQNKRYTCIENQNCQIDKTQRKRCPY  
 CRFKKCIDVGMKLEAVRADMRGGRNKFPGMYKRDRALKQQKALIRANGLKLEAMSQVIQAMPDLTSA  
 IQNIHSASKGLPLSHVALPPTDYDRSPFVTSPISMTMPHGSLOQGYQPYGHFNPRAIKSEYPDPYSSSPE  
 SMMGYSYMDGYQTSSPASIPHLILELLKCEPDEPQVQAKIMAYLQQEQNNRNRQEKL SAFGLLCKMADQT  
 LFSIVEWARSSIFFRELKVDDQMKLLQNCWSELLILDHIYRQVAHGKEGTIFLVTGEHVDYSSII SNTEV  
 AFNNLLSLAQELVVRRLRSLQFDQREFVCLKFLVLFSSDVKNLENFQLVVEGVQEQVNAALLDYTLNYPQQ  
 TEKFGQLLLRLPEIRAI SKQAEDYLYYKHVNGDVPYNNLLIEMLHAKRA

>NR5A2\_MOUSE

MSASLDTGDFQEFLKHGLTAIASAPGSETRHSPKREEQLREKRAGLPDRHRRPIPARSRLVMLPKVETEA  
 PGLVRSHGEGQMPENMQVSQFKMVNYSYDEDELEELCPVCGDKVSGYHYGLLTCECKGFFKRTVQNKR  
 YTCIENQNCQIDKTQRKRCPYCRFKKCIDVGMKLEAVRADMRGGRNKFPGMYKRDRALKQQKALIRAN  
 GLKLEAMSQVIQAMPDLTSAIQNIHSASKGLPLSHVALPPTDYDRSPFVTSPISMTMPHSSHLGYQPY  
 GHFSPRAIKSEYPDPYSSSPE SMMGYSYMDGYQTNSPASIPHLILELLKCEPDEPQVQAKIMAYLQQEQS  
 NNRNRQEKL SAFGLLCKMADQTLFSIVEWARSSIFFRELKVDDQMKLLQNCWSELLILDHIYRQVAHGKEG  
 TIFLVTGEHVDYSTI ISHTEVAFNNLLSLAQELVVRRLRSLQFDQREFVCLKFLVLFSSDVKNLENLQVE  
 GVQEQVNAALLDYTVCNYPQQTEKFGQLLLRLPEIRAI SKQAEDYLYYKHVNGDVPYNNLLIEMLHAKRA

>NR5A2\_CHICK

MLPKVETEALGLARSNGEQGMPENMQVSQFKMVNYSYDEDELEELCPVCGDKVSGYHYGLLTCECKGFF  
 KRTVQNNKRYTCIENQNCQIDKTQRKRCPYCRFQKCLSVGMKLEAVRADMRGGRNKFPGMYKRDRALKQ  
 QKALIRANGLKLEAMTQVIQAMPDLTISSAIQNIHSASKGLPLNHTALPPTDYDRSPFVTSPISMTMP  
 PHGSLOQGYQTYGHFSPRAIKSEYPDPYTSSPESIMGYSYMDGYQTSSPASIPHLILELQKCEPDEPQVQA  
 KIMAYLQQEQANRSKHEKLNTFGLMCKMADQTLFSIVEWARSSIFFRELKVDDQMKLLQNCWSELLILDH  
 IYRQVVHVKEGSI LLVTGQQVDYSV IASQAGATLNNLMSHAQELVAKLRSLQFDLREFVCLKFLVLFSLD  
 VKNLENFQLVVEGVQEQVNAALLDYTCNYPQQTDKFGQLLLRLPEIRAI SMQAEEYLYYCKHLNGDVP  
 CNLLIEMLHAKRA

>Q5XGE7\_XENTR

MLPKVEPEALGLSRSHGEGHMPENMQASQFKMMGYSYDEELEEMCPVCGDKVSGYHYGLLTCECKGFF  
 KRTVQNNKRYTCIENQSCQIDKTQRKRCPYCRFQKCLSVGMKLEAVRADMRGGRNKFPGMYKRDRALKQ  
 QKALIRANGLKLEAMQVIQSIPTDLTISSAIQNIHSASKGLPLNHAALPPSDYDRSPFVTSPISMAMP  
 PHGSLOQGYQAYGHFSPRAIKSEYPDPYTSSPESIMGYSYMDSYQSSSPSNIPHLIVELKCEPDEPQVQ  
 KIMAYLQQEQANRSKHDKLNTFGLMCKMADQTLFSIVEWARSSIFFRELKVDDQMKLLQNCWSELLILDH  
 IFRQVLHGKEGSI LLVTGQQVDYSVIVTQAGATLNNLMSHAQDLVAKLRSLQFDLREFVCLKFLVLFSLD  
 VKNLENYQLVEGVQEQINAALLDYTCNYPQQTDKFGQLLLRLPEIRAI SLQAEEYLYYKHLNGDVP  
 CNLLIEMLHAKRA

LLIEMLHAKRA

>Q9IB82\_RANRU

MLPKVESEALGLSRSHGEHGQMPDNMQVSQFKMMGYSYDDLEEMCPVCGDKVSGYHYGLLTCECKGFF  
 KRTVQNNKRYTCIENQTCQIDKTQRKRCPCYCRFQKCLSVGMKLEAVRADMRGGRNKFGPMYKRDRALKQ  
 QKKALIRANGLKLEAMSQVIQAIPTDLTISSAIQNIHSASKGLPLNHTALPPTDYDRSPFVTSPI SMAMP  
 PHGSLQSYQAYGHFSPRAIKSEYPDPYTSSPESLMGYSYMDSYQSSSPSNIPHLIVELLKCEPDEPQVQS  
 KIMSYLQQEQANRSKHKDLNTFGLMCKMADQTLFSIVEWARSSIFFRELKVDDQMKLLQNCWSELLILDH  
 IFRQVLHGKEGSILLVTGQQVDFSVIVSQAGTTLNNLMSHAQELVAKLRSLQFDMREFVCLKFLVLFSLD  
 VKNLENFQLVEGVQEQINAALLDYTLCYYPQQTDFGQQLLLRRLPEIRAI SLQAEEYLYYKHLNGDVPCNN  
 LLIEMLHAKRA

>Q91544\_XENLA

MLPKVESEALGLSRLHGEQGHPDNMQVSQYKMMGYSYDDELEELCPVCGDKVSGYHYGLLTCECKGFF  
 KRTVQNNKRYTCIENQSCPIDKTQRKRCPCYCRFQKCLSVGMKLEAVRADMRGGRNKFGPMYKRDRAIKQ  
 QKKALIRANGLKLEAIGQVIQSIPTDLTISSAIQNIHSASKGLHLNHAALPPSDYDRSPFVTSPI SMAMP  
 PHGSLQGYQSYGHFSPRAIKSEYPDPYTSSPESIMGYSYMDSYQSSSPSNIPHLIVELLKCEPDEPQVQG  
 KIMAYLQQEQANRSKHKDLNTFGLMCKMADQTLFSIVEWARSSIFFRDLKVDDQMKLLQNCWSELLILDH  
 IFRQVLHGKEGSILLVTGQQVDYSVIVTQAGATLNNLMSHAQDLVAKLRSLQFDLREFVCLKFLVLFSLD  
 VKTLENYQLVEGVQEQVNAALLDYTMCNYPQQTDFGQQLLLRRLPEIRAI SLQAEEYLYYKHLNGDVPCNN  
 LLIEMLHAKRA

>Q90YL6\_BRARE

MLPKVESEYLGLARSHGEQGHPGNMQAPQFKMMDYSYDELDDEMCPVCGDKVSGYHYGLLTCECKGFF  
 KRTVQNNKRYTCIENQSCQIDKTQRKRCPCYCRFQKCLTVGMKLEAVRADMRGGRNKFGPMYKRDRALKQ  
 QKKALIRANGLKLEAMTQVMQTVPADLTITSAIQNIHSASKGLPLSHHHHHHHHHHHSSSSAGLPPADF  
 DRSPFVTSPIVSMAMP PHAGGLQGYQAYGHFQSRTIKSEYPDPYTSSPESLMGYPYVEAYAGSPPSFPHL  
 VVELLKCEPDEPQVQAKILAYLQQEQASRGKHEKLNFTGLMCKMADQTLFSIVEWARSSIFFRELKVDDQ  
 MKLLQNCWSELLILDHVFRQVMHAKEGSILLVTGQQVDYALIASQAGATLNNLLSHAQELVSKLRSLQLD  
 QREFVCLKFLVLFSLDVKNLENFHLVESVQEQVNAALLDYVMCNYPQQTDFGQQLLLRRLPEIRAI SLQAE  
 EYLYYKHLNGDVPCNNLLIEMLHAKRA

>Q9GKL1\_HORSE

MSSNLDTGDLRDSGKHGLTPIVSQFKMVNYSYDELDLEELCPVCGDKVSGYHYGLLTCECKGFFKRTVQN  
 NKRYTCIENQNCQIDKTQRKRCPCYCRFQKCLSVGMKLEAVRADMRGGRNKFGPMYKRDRALKQ QKKALI  
 RANGLKLEAMSQVIQAMPSELSISSAIQNIHSASKGLPLNHAALPPTDYDRSPFVTSPI SMTPPHGSLQ  
 GYQTYSHFSPRAIKSEYPDPYTSSPESIMGYSYMDGYQTSSPASIPHLILELLKCEPDEPQVQAKIMAYL  
 QQEQANRSKHEKLSFTGLMCKMADQTLFSIVEWARSSIFFRELKVDDQMKLLQNCWSELLILDHIYRQVV  
 HGKEGSIFLVTGQQVDYSIIASQAGATLNNLMSHAQELVAKLRSLQFDQREFVCLKFLVLFSLDVKNLEN  
 FQLVEGVQEQVNAALLDYTMCNYPQQTEKFGQQLLLRRLPEIRAI SMQAEEYLYYKHLNGDVYPNNLLIEML  
 HAKRA

>O42186\_BRARE

MLPKVESEYLGLARSHGEQGHPGNMQAPQFKMMDYSYDELDDEMCPVCGDKVSGYHYGLLTCECKGFF

KRTVQNNKRYTCIENQSCQIDKTQRKRCPYCRFQKCLTVGMKLEAVRADMRGGRNKFPGMYKRDRALKQ  
 QKKALIRANGLKLEAMTQVMQTPADLTITSAIQNIHSASKGLPLSHHHHHHHHHHHSSSSAGLPPADF  
 DRSPFVTSPVSMAMPFHAGGLQGYQAYGHFQSRTIKSEYPTPTQARQSPHGLPLRRSLRSGSPSPFPHLV  
 VELLKCEPDEPQVQAKILAYLQQEQASRGKHEKLNFTGLMCKMADQTLFSIVEWARSSIFFRELKVDDQM  
 KLLQKCWRELLILDHVFRQVMHAKEGSILLVTGQQVDYALIASQAGATLNNLLSHAQELVSKLRSLLDQ  
 REFVCLKFLVLFSLDVKNLENFHLVESVQEQVNAALLDYVMCNYPQQTDFGQLLLLRLPEIRAIISLQAE  
 YLYYKHLNGDVPCNNLLIEMLHAKRA

>Q9IB81\_RANRU

MMGYSYDDDLEEMCPVCGDKVSGYHYGLLTCECKGFFKRTVQNNKRYTCIENQTCQIDKTQRKRCPYCR  
 FQKCLSVGMKLEAVRADMRGGRNKFPGMYKRDRALKQKALIRANGLKLEAMSQVIQAIPTDLTIS  
 IQNIHSASKGLPLNHTALPPTDYDRSPFVTSPISMAMPFHGSLQSYQAYGHFSPRAIKSEYDPYTS  
 SPSLMGYSYMDSYQSSSPNIPHLIVELLKCEPDEPQVQSKIMSILYQEQANRSKHDKLNFTGLMCKMADQ  
 TLFSIVEWARSSIFFRELKVDDQMILLQNCWSELLILDHIFRQVLHGKEGSILLVTGQQVDFSVIVS  
 QAGTTLNNLMSHAQELVAKLRSLLQFDMREFVCLKFLVLFSLDVKNLENFQVLEGEVQEQINAALLD  
 YTLCYYPQQTDFGQLLLLRLPEIRAIISLQAEYLYYKHLNGDVPCNNLLIEMLHAKRA

>Q9PWI7\_CHICK

MDYSYDEDLDELCPVCGDKVSGYHYGLLTCECKGFFKRTVQNNKHYTCTESQNCIDKTQRKRCPYCRF  
 QKCLTVGMRLEAVRADMRGGRNKFPGMYKRDRALKQKALIRANGFKLETVPQIVSPVQNDYGLSSTI  
 HSIHAMAKTLPNPAALTPADYERGPYGTPLAMTVPGHTPLAGYHYPSFPNRAIKSEYPDHYSAAHEAV  
 PTYAYPETYPSSSPDIPVILKLLQLEPDEAQVKARILACLQEQGKRHEKLNFTGLMCKMADQTLFS  
 IVEWARSCIFFKELEVGDQMKLLQNCWSELLVFDHVYRQLQHGKEHSVLLVTGQEVDSAVAAQAGSILH  
 SLVLRQELVHLHLSLQVDRQEFVCLKFLILFSLDVKYLENHALAKDAQEKANAALLEYTVCHYPHCTDK  
 FRQLLLLRLTEVRALSMQAEYLYYKHLNGDVPCNNLLIEMLHAKRT

>STF1\_RAT

MDYSYDEDLDELCPVCGDKVSGYHYGLLTCECKGFFKRTVQNNKHYTCTESQSKIDKTQRKRCPF  
 CRFQKCLTVGMRLEAVRADMRGGRNKFPGMYKRDRALKQKKAQIRANGFKLETGPPMGVPPPPPP  
 PDYMLPPSLHAPEPKALVSGPPSGPLGDFGAPSLPMAVPGPHGPLAGYLYPAFSNRTIKSEYPEPYAS  
 PPQQPGPPYSYPEPFGGPNVPELILQLLQLEPEEDQVRARIVGCLQEPAKSRPDQPAPFSLCRMADQ  
 TFIGSIVDWARRCMVFKELEVADQMTLLQNCWSELLVLDHIYRQVYQKEDSILLVTGQEV  
 ELSTVAVQAGSLLHSLVLRQELVQLHALQLDRQEFVCLKFLILFSLDVKFLNNHSLVKDAQEKANA  
 ALLDYTLCHYPHCGDKFQQLLLCLVEVRALSMQAEYLYYKHLNGEMPRNLLIEMLQAKQT

>Q812G5\_MOUSE

MDYSYDEDLDELCPVCGDKVSGYHYGLLTCECKGFFKRTVQNNKHYTCTESQSKIDKTQRKRCPF  
 CRFQKCLTVGMRLEAVRADMRGGRNKFPGMYKRDRALKQKKAQIRANGFKLETGPPMGVPPPPPP  
 PDYMLPPSLHAPEPKALVSGPPSGPLGDFGAPSLPMAVPGPHGPLAGYLYPAFSNRTIKSEYPEPYAS  
 PPQQPGPPYSYPEPFGGPNVPELILQLLQLEPEEDQVRARIVGCLQEPAKSRSDQPAPFSLCRMADQ  
 TFIGSIVDWARRCMVFKELEVADQMTLLQNCWSELLVLDHIYRQVYQKEDSILLVTGQEV  
 ELSTVAVQAGSLLHSLVLRQELVQLHALQLDRQEFVCLKFLILFSLDVKFLNNHSLVKDAQEKANA  
 ALLDYTLCHYPHCGDKFQQLLLCLVEVRALSMQAEYLYYKHLNGEMPRNLLIEMLQAKQT

>O42102\_CHICK

MDYSYDEDLDELCPVCGDKVSGYHYGLLTCECKGFFKRTVQNNKHYTCTESQNKIDKTQRKCCPYCRF  
 QKCLTVGMRLEAVRADRMGRGNKFGPMYKRDRAKQKQKALIRANGFKLETVPQIVSPVQNDYGLSSTI  
 HSIHAMAKTLPNPAALTADYERGPYGTPLAMTVPGHTPLAGYHYPSFPNRAIKSEYPDHYSAAHEAV  
 PTYAYPETYPSSSPDPEVILKLLQLEPDEAQVKARILACLQEQGKGRHEKLSFGLMCKMADQTLFS  
 IVEWARSCEFFKELEVGDQMKLLQNCWSELLVFDHVYRQLQHGKEHSVLLVTGQEVDSLAVAAQAGSILH  
 SLVLRAQELVHLHLSQVDRQEFVCLKFLILFSLDVKYLENHALAKDAQEKANAALLEYTVCHYPHCTDK  
 FRQLLLRLTEVRALSMQAEEYLYHKHLSGEVPCNNLLIEMLHAKRT

>Q90XC4\_POEGU

MDYSYDEDLDELCPVCGDKVSGYHYGLLTCECKGFFKRTVQNNKHYTCTESQSKIDKTQRKRCPYCRF  
 QKCLTVGMRLEAVRADRMGRGNKFGPMYKRDRAKQKQKALIRANSFKLETVPQIMSPVQSDYLSSTI  
 HSIHAMSKTLPNPAALTADYERSPYGTPLGMTVPGHAPLPGYHYPSFPNRTIKSEYPDHYTNAHEAV  
 PAYMYPETYPSSSPDPEVILKLLQLEPDEAQVKARILSCLQEQGKGRHEKLSFGLMCKMADQTLFS  
 IVEWARSCEFFKELEVGDQMKLLQNCWSELLVFDHIYRQLQHGKEHSVLLVTGQEVMSAIAAQAGSILN  
 TLVLRAQELVHLHLSLQVDRHEFVCLKFLILFSLDVKYLENHTLAKDAQEKANAALLEYTVCHYPHSTDK  
 FRQLLLWLAEVRALSQAEEYLYHKHLSGEVPCNNLLIEMLHAKRT

>STF1\_BOVIN

MDYSYDEDLDELCPVCGDKVSGYHYGLLTCECKGFFKRTVQNNKHYTCTESQSKIDKTQRKRCPFCRF  
 QKCLTVGMRLEAVRADRMGRGNKFGPMYKRDRAKQKQKAIIRANGFKLETGPPVGVPPPPPPPPDYML  
 PHGLHASEPKGLASGPPAGPLGDFGAPALPMAVPSAHGPLAGYLYPAFPGRAIKSEYPEPYASPPQPGPP  
 YGYPEPFGSGGVPPELILQLLQLEPDEDQVRARIVGCLQEPKGRPDQPAPFSLLCRMADQTFISIVDWA  
 RRCMVFKLEVADQMTLLQNCWSELLVFDHIYRQIQHGKEGSILLVTGQEVELTTVAQAGSLLHSLVLR  
 AQELVLQLHALQLDRQEFVCLKFLILFSLDVKFLNNHSLVKEAQEKANAALLDYTLCHYPHCGDKFQQLL  
 LCLVEVRALSMQAKEYLYHKHLGNEMPRNNLLIEMLQAKQT

>STF1\_MOUSE

MDYSYDEDLDELCPVCGDKVSGYHYGLLTCECKGFFKRTVQNNKHYTCTESQSKIDKTQRKRCPFCRF  
 QKCLTVGMRLEAVRADRMGRGNKFGPMYKRDRAKQKQKAIIRANGFKLETGPPMGVPPPPPPPPDYML  
 PPSLHAPEPKALVSGPPSGPLGDIGAPSLPMSVPGPHGPLAGYLYPAFSNRTIKSEYPEPYASPPQPGP  
 PYSYPEPFGSGPNVPELILQLLQLEPEEDQVRARIVGCLQEPKSGSDQPAPFSLLCRMADQTFISIVDW  
 ARRCMVFKLEVADQMTLLQNCWSELLVLDHIYRQVQYQKEDSILLVSGQEVELSTVAVQAGSLLHSLVLR  
 RAQELVLQLHALQLDRQEFVCLKFLILFSLDVKFLNNHSLVKDAQEKANAALLDYTLCHYPHCGDKFQQLL  
 LLCLVEVRALSMQAKEYLYHKHLGNEMPRNNLLIEMLQAKQT

>Q9YI54\_TRASC

MDYSYDEDPNQLCPVCGDKVSGYHYGLLTCECKGFFKRTVQNNKHYTCTESQNSKIDKTQRKRCPYCRF  
 QKCLTVGMRLEAVRADRMGRGNKFGPMYKRDRAKQKQKALIRANGFKLETVPQIVSPVQTDYNSSTI  
 HGIHSVSKSLPPNPATMTADYDRSPYGTPLGMTVPSHGALSSYHYPSFPNRTIKSEYPDHYTNSHESV  
 ASYMPDAYPNSAPPDPEVILKLLQLEPDEPQVKVIRILACLQEQGKGRHEKLSFGLMCKMADQTLFS  
 IVEWARSCEFFKELEVGDQMKLLQNCWSELLVFDHIYRQVQHGKEHSMLLVGTGQEVEMATIAAQAGSNLN  
 NLVLRAQELVHLHLSLQVDRQEFVCLKFLILFSLDVKYLENHSLAKDAQEKANAALLEYTICHYPHAADK  
 FRQLLLRLAEIRLSMQAEEYLYHKHLSGEVPCNNLLIEMLHAKRT

>STF1\_PIG

MDYWDYDEDLDELCPVCGDKVSGYHYGLLTCECTCKGFFKRTVQNNKHYTCTESQSCIKDKTQRKRCPFRCF  
 QKCLTVGMRLEAVRADMRGGRNKFPGMYKRDRAKQKKAQIRANGFKLETGPPMGVAPPPPPPDYML  
 PPGLHAPEPKGLAAGPPTGPLGDFGAPTLPMAVPSAHGPLAGYLYPAFPGRAIKSEYPEPYASPPQPGPP  
 YGYPEPFSSGGPGVPELIVQLLQLEPDEDQVRARIVGCLQEPKGRPDQPAPFSLLCRMADQTFISIVDWA  
 RRCMVFKLELEVADQMTLLQNCWSELHVFVDHIYRQIQHGKEGSILLVTGQEVELTTVAAQAGSLLHGLVLR  
 AQELVLQLHALQLDRQEFVCLKFLILFSLDVKFLNNHSLVKDAQEKANAALLDYTLCHYPHCGDKFQQLL  
 LCLVEVRALSMQAKEYLYHKHGLGNEMPRNLLIEMLQAKQT

>STF1\_HUMAN

MDYSYDEDLDELCPVCGDKVSGYHYGLLTCECCKGFFKRTVQNNKHYTCTESQSCIKDKTQRKRCPFRCF  
 QKCLTVGMRLEAVRADMRGGRNKFPGMYKRDRAKQKKAQIRANGFKLETGPPMGVPPPPPPAPDYVL  
 PPSLHGPEPKGLAAGPPAGPLGDFGAPALPMAVPGAHGPLAGYLYPAFPGRAIKSEYPEPYASPPQGLP  
 YGYPEPFSSGGPNVPELILQLLQLEPDEDQVRARILGCLQEPKSRPDQPAAFGLLCRMADQTFISIVDWA  
 RRCMVFKLELEVADQMTLLQNCWSELLVFDHIYRQVQHGKEGSILLVTGQEVELTTVATQAGSLLHSLVLR  
 AQELVLQLLALQLDRQEFVCLKFIILFSLDLKFLNNHILVKDAQEKANAALLDYTLCHYPHCGDKFQQLL  
 LCLVEVRALSMQAKEYLYHKHGLGNEMPRNLLIEMLQAKQT

>STF1\_MACEU

MDYSYDEDLDELCPVCGDKVSGYHYGLLTCECCKGFFKRTVQNNKHYTCTESQNCIKDKTQRKRCPYCRF  
 QKCLTVGMRLEAVRADMRGGRNKFPGMYKRDRAKQKKAQIRANGFKLETGPPMGVPPPPPPQTDYPLAPAL  
 HPGAKGLAPAPPAGPPGDYERGPYGGVPMVPTHGPLAGYLYPAFPGRAIKSEYPEPYASPHEPAPPY  
 GYPEPYSPGGLPGVPELILKLLQLEPDEGQLKARILACLQEPKGRPDRPTPFGLMCKMADQTLFSIVE  
 WARSCVVFKELEVADQMKLLQNCWSELLVFDHIYRQIQHGKEGSILLVTGQEVLDLSTVAAQAGSLLHSLV  
 LRAQDLVQQLHSLQVDRQEFVCLKFLILFSLDVKFLNNHGLAKDAQEKANSALLEYTMCHYPHCGDKFRQ  
 LLLRLAEVRSLSMQAEEYLYHKHGLGGEVPCNNLLIEMLHAKRT

>STF1\_HORSE

MDYSYDEDLDELCPVCGDKVSGYHYGLLTCECCKGFFKRTVQNNKHYTCTESQSCIKDKTLRKRCPFCRF  
 QKCLTVGMRLEAVRADMRGGRNKFPGMYKRDRAKQKKAQIRANGFKLETGPPMGVPPPPPPPDYML  
 PPGLHVPEPKGLASGPPAGPLGDFGAPALPMAVPSTNGPLAGYLYPAFPGRAIKSEYPEPYASPPQPGPP  
 YGYPEPFSSGGPGVPELILQLLQLEPDEDQVRARIIGCLQEPKGRPDQPASFNLLCRMADQTFISIVDWA  
 RRCMVFKLELEVADQMTLLQNCWSELLVFDHIYRQVQHGKEGSTLLVTGQEVELTTVAAQAGSLLHGLVLR  
 AQELVLQMHALQLDRQEFVCLKFLILFSLDVKFLNNHSLVKDAQEKANTALLDYTLCHYPHCGDKFQQLL  
 LCLVEVRALSMQAKEYLYHKHGLGNEMPRNLLIEMLQAKQT

>Q9YI95\_RANRU

MDYSYDEDLDELCPVCGDKVSGYHYGLLTCECCKGFFKRTVQNNKRYTCTENQSCIKDKTQRKRCPYCRF  
 QKCLNVGMRLEAVRADMRGGRNKFPGMYKRDRAKQKKAQIRANGIKLETVPQIVSQVQTDYSVANNI  
 HTIHPVSKNLPNTAPMTPEYDRGSYGGPPIAMTLPNHAPLSGYHYSSFSRTIKSEYPDHYSNVHDPS  
 TAGGYVYPEAYTSTSQPDIEVILKLLQLEPDEPQIKARIISCLQEQNKSRHEKLSMFGLMCKMADQTL  
 FSIVEWARSCIYFKELEVSDQMILLQNCWSELLVFDHIYRQMQHSEKENSILLVTGQEIELSAIAAQAGST  
 LNNLVLRAQELVILLHSLQVDRQEFVCLKFLILFSLDEKFLNNHSLAKSAQEKVDSALMEYTMCHYPHCT

DKYRLLLLRLAEIRSI SMQAEYLYHKHLSGEVPCNNLLIEMLHAKRA

>Q6QHU4\_PLEWA

MEYTYDEDLDELCPVCGDKVSGYHYGLLTCE SCKGFFKRTVQNNKRYTCTENQTCKIDKTQRKRCPCRF  
 QKCLTVGMRLEAVRADRMGRNKFPGMYKRDRAKQQKKALIRANGFKLETVPQIVSPTQTEYTI PSNI  
 HSIHVSXSLPLNTVAMTQVNYDRSPYGTPSLGMTMPNHGALQGYTYPHFPNRTIKSEFPDHYSSPHE SV  
 APAFVYSDAYQNSFPDI PETILNLLQLEPDEPQIKARILACLQQEQGKSRHEKPPSTFGLMCKMADQTL  
 FSIVEWARSCIYFKELEVGDQMILLQNCWSELLVFDHIYRQIQHGKENSILLVTGQEIDVSTIAAQAGPA  
 LNNLVLSQELVIQLHSLQVDRQEFVCLKFLILFSVDEKCLENNTLARNAQEKINAALHEYTMCHYPHCM  
 DKFRLLLLRLTDIRSISMLAEDYLYHKHMSGEVPCNNLLIEMLHAKRS

>O93258\_ORYLA

MLGDKAHGVTLKVMEYTYDEDLEELCPVCGDKVSGYHYGLLTCE SCKGFFKRTVQNNKRYTCAENQECKI  
 DKTQRKRCPCRFQKCLNVGMRLEAVRADRMGRNKFPGMYKRDRAKQQKKALIRSNQFKLESTALPS  
 ASPLQTDYSFTGTLHTLPTISKSLPSTSSVPTDYEANLYGPTSLGMAMQSHVPLNPQYQYTAFFPSRA  
 IKAECPDYTSSPELTYGYPYDVYPSASPPSLPPLVLELLRCDPDELVVQNKIVAHLQQEQSNRGRLD  
 KPSTFSLMCRMADQTLFSIVEWARSCIFFKELRVGDQMKLLHNCWSELLVLDHIFRQVQHGEDSILLVT  
 GQEVQLSSILSQEATLCSLVQRGQELAAARLRALQVDRREIACLKFLLLFNPVNLLENQAFVEGVQEQV  
 NGALLEYTLTTPYQFQEKFSQLVVRLPELRSLSLTAEDYLCYMHLSGEVPCNNLLIEMLHAKRACV

>Q7ZT68\_ORENI

MLGDKAHGVTLKVMEYTYDEDLEELCPVCGDKVSGYHYGLLTCE SCKGFFKRTVQNNKRYTCAENQECKI  
 DKTQRKRCPCRFQKCLNVGMRLEAVRADRMGRNKFPGMYKRDRAKQQKKALIRSNQFKLESTAPPP  
 ASPLQADYGFYGTGTLHTLPTISKSLPSTPSSITPTDYEANLYGPPSLGMAMQSHVPLTQYQYTAFFGRA  
 IKAECPDYTSSPETLTYGYPYDMPYPSASPPSLPPLVLELLRCDPDELVVQNKIVTHLQQEQNGRGRLE  
 KPSTFSLMCRMADQTLFSIVEWARSCIFFKELRVGDQMKLLHNCWSELLVLDHIFRQVQHAKEDSILLVT  
 GQEVELSSILSQAEGTLSSLVQRGQELAAARLRVLRVQVDRREIACLKFLLLFNPVNLLENQAFVEGVQEQV  
 NAALLEYTLTSAYPQFQEKFSQLLVRLPELRSLSLTAEDYLCYMHVSGEVPCNNLLIEMLHAKRACV

>Q800U8\_BRARE

MDYSYDADLEEMCPVCGDKVSGYHYGLLTCE SCKGFFKRTVQNNKRYTCAESQDCKIDKTQRKRCPCRF  
 QKCLNVGMRLEAVRADRMGRNKFPGMYKRDRAKQQKKALIRASGLKMEATPPLTSPQPDYTFSTAL  
 SVPAPKNTHPNIVTSVAPT DYERSLYASSLSLSVPIPAHTPLPAQYYPNLP SRAIKSEYPDHYTSSEH  
 YTSASSPESVPGYTYIEQTRVSSSPQVVAPGLTVPPLVLEFVRC EQDELQVQSKISAHLAHLQQEQNSRS  
 TAANQEQSSRLAAKPERLSTFGLMCHMADQTLFSIVEWARSCIFFKELKVGDMKLLHNCWSELLVLDYV  
 ARQLHHGKEDSVLLITGQEVELASLLAQAGVTLSGMIQRGQELVQRLQELQLDRRETA CLKYLILFNPDV  
 KLENQPYVESVYEQVNAALLEYTLCAYPQFPDRFSQILLRLPELRLSSQAEDYLCYKHLSGEVPCNNL  
 LIEMLHAKRTCI

>Q8UV27\_CLAGA

MEFTTEEDLEELCPVCGDKVSGYHYGLLTCE SCKGFFKRTVQNNKRYTCNQNDQCGIDKTQRKRCPCRF  
 QKCLSVGMRLEAVRADRMGRNKFPGMYKRDRAKQQKRALIRASTFKLEHNPLVPSNQAEYPPFGSV  
 PGLLAPLGPDPYDCPPACPPSLGVALHSYGSFPAQYQYTTPTVPGRS IKAEHDPDYSGPS DSSLGYSYAE  
 GCIAASPQTSPLNPAVPSLVLELLSCEPDEEQVRAKICAYLQQEQSGRGKLDKPRPSNLLCVMADQTLFS



IVEWARSCIFFKELKVGDMQLLHNCWSELLLLLDHVFRQVHHGRDNTLLLITGQEVLELAGVSDSGLTSL  
 SLVQRGQELARRLQLLQVDRREMACLKFLVLFNPNVKLLENQALVESVQEQVNSSLLEYTLTSPQHVD  
 FSQVLVRLPEVRALSAQAEYLSKHLSGDVPCNNLLIEMLHAKRATTI

>Q9IAI9\_BRARE

MDFRADEDLEELCPVCGDKVSGYHYGLLTCECKGFFKRTVQNNKRYTCTQNQDCGIDKTQRKRCPF  
 QKCLSVGMRLAERADRMGRNKFPGMYKRDRAKQQKRALIRASGFKLEANGTLLSGQTEFSSVGLQS  
 PYDCPPPALGVALQNYGSFPAQYQYTAPSLPKSIKAEYDPAYPSSPDSTLGYSYADGCLSASPHSVPINP  
 ALPPLVLELQSCDPDEEQVRGKICAYLHQEQSGRGKLEKSRPSSLLCVMADQTLFSIVEWARSCVFFKEL  
 KVGDMRLLHNCWSELLLLLDHICRQVHHGRDGSLLITGQEVLESAVLDAGPPLSSMVERGQDLSRRLQL  
 LQVDSREMACLKFLILFNPVKLLENPQFVESVQEQVNGALLEYTLFSYPQCVERFSQLILRLELRSLS  
 AEAEDFLCYKHLCEVPCNNLLIEMLHAKGSSAQ

>FTZF1\_BOMMO

MHEDAPKMSIAQSLAASTSQPKGDIVTEIPLFAMSSMETKSIETTVELKITIVDPTTGTGGEPGAYLP  
 TAGTVCDQTDTKDVIIEELCPVCGDKVSGYHYGLLTCECKGFFKRTVQNNKVYTCVAERACHIDKTQRKR  
 CPFRCRQKCLDVGMLAERADRMGRNKFPGMYKRDRAKQLQMMRQRQIAVQTLRGS LGDGLVLFVGF  
 SPYTAHSVKEIQIPQVSSLTSSPESSPGPALLGAQPQPQPPTHDKWEAHSASPD AFTFDTQS  
 NTAATPSSTAEATSTETLRVSPMIREFVQTVDDREWQNALFGLLQSQTYNQCEVDL FELMCKVLDQNLFS  
 QVDWARNTVFFKYLVDDQMKLLQDSWSVMLVLDHLHQRMHNGLPDETTLHNGQKFDLLCLGLLVPSLA  
 DHFNELQNKLAELKFDVPDYICVKFMLLLNPEVRGIVNVKCVREGYQTVQAALLDYTLTCYPTIQDKFGK  
 LVMVVEIHALAARGEELHYQRHCAGQAPTQTLLEMLHAKRKS

>Q91601\_XENLA

MLPKVESEALGLSRLHGEQGHMPDNMQVSQYKMMGYSYDDELEELCPVCGDKVSGYHYGLLTCECKGFF  
 KRTVQNNKRYTCIENQSCPIDKTQRKRCPYCRFQKCLSVGMRLAERADRMGRNKFPGMYKRDRAIKQ  
 QKKALIRANGLKLEAIGQVIQSIPTDLTISSAIQNIHSASKGLHLNHAALPPSDYDRSPFVTSPI SMAMP  
 PHGSLQGYQSYGHFPSRAIKSEYDPYTSPPESIMGYSFMDSYQSSSPSNIPHLIVELLKCEPDEPQVQG  
 KIMAYLQEQANRSKHDKLNTFGLMCKMADQTLFSIVEWARSSIFFRDLKKIK

## (6) 0 NR6

## (7) 6 NR0

>DAX1\_PIG

MAGEDHQWQGSILYNMLMSAKQTHATREAPPEARLRGSCWGCSCGSEPPVREGQPGGPAVALLYRCCFCG  
 EDHPRQGSILYNMLTSAKQTOETPEAPPEARLGACWGCSCGSEPRVGREELPGGRATVLLYRCCFCGEEH  
 PRQGSILYSLTSAKQTHVALEAPPEARPGAWWDRSYCAQR LGAREELPGGRPVTLPYRCCFCGEDHPRQ  
 SGILCNMPSAKQTHVAPEAQPGAPWWDPSCAAQRVALKSPQVVEAASAGLLKTLRFVKYLPFCQVPLPL  
 DQQLVLRSCWAPLLMLELAQDRLNFEVETLEPSLLQMI LTRRQETEGDEPPSPQPPVQPHLVLPSEA  
 EHLPSVAEVQAIKGF LAKCWSLDISTKEYAYLKGTVLFNPDLPGLQCVKIYIQLQWGTQQILSEHIRMTH  
 RGYQARFAELNSALFLRFINANVLAELFFRPIIGTVSMDDMMLEMLCAKL

>DAX1\_RAT

MAGEDHPWHGSILYNLLMSAKQKHGSREEREVRLGAQCWGCACGTQPVLGGEGLPGGQALSLLYRCCFCG

ENHPRQGGILYSMLTNARQPSGATEAPRARFRTPCWGCACSNAPLVGRXGLPAGQVPSLLYRCCFCGKK  
 HPRQGSILYSLLTNAQQTHVSREVPEAHRGGEWWQLSYCTHNVGGPEGLQSTQAMAFLYRSYVCCEEQPO  
 QSSVASDTPVRADQTPAAPQEQPRAPWWDTSQSGVQRPIALKDPQVVCEAASAGLLKTLRFVKYLPFCFQIL  
 PLDQQLVLRSCWAPLLMLELAQDHLHFEMMEISEPNLMHEMLTTRRQETEGPEPADPQATEQPQTVSAE  
 AGHVLSVAAVQAIKSFFFKCSWLNIDTKEYAYLKGTVLFNPDLPGLQCVKYIESLQWRTQQIILTEHIRLM  
 QREYQIRSAELNSALFLLRFINTDVVTELFRRPIIGAVSMDDMMLEMLCAKL

>DAX1\_HUMAN

MAGENHQWQGSILYNMLMSAKQTRAAPEAPETRLVDQCWGCSCGDEPGVGRELLGGRNVALLYRCCFCG  
 KDHPRQGSILYSMLTSAKQTYAAPKAPEATLGPWCSCSGSDPGVGRAGLPGGRPVALLYRCCFCGEDHP  
 RQGSILYSLLTSSKQTHVAPAAPEARPGAWWDRSYFAQRPGGKEALPGGRATALLYRCCFCGEDHPQQG  
 STLYCVPTSTNQAQAAPEERPRAPWWDTSQSGALRPVALKSPQVVCEAASAGLLKTLRFVKYLPFCFQVPLP  
 DQQLVLRNCWASLLMLELAQDRLQFETVEVSEPSMLQKILTTRRRETGGNEPLPVPTLQHHLAPPAEAR  
 KVPSASQVQAIKCFLSKCSWLNISTKEYAYLKGTVLFNPDVPGLQCVKYIQGLQWGTQQIILSEHTRMTHQ  
 GPHDRFIELNSTLFLRFINANVIAELFFRPIIGTVSMDDMMLEMLCTKI

>Q9PTE9\_CHICK

MACLERCHCCADGRRHGSILYSILKSHDQAAEGPGPRRQAGRGCSQRRVALKSPQVVCKAASAVLV  
 KTLRFVQNVPCFQELPLDEQLVLRSCWAPLLVLGLAQERVHLETVESAEPSMLQRILTRRLGEHAPAP  
 GRQHPPSAGEIQAIKGFLLAKCWSLDISTKEYAYLKGTVLFNPDLPGLQCTQYIEGLQKEAQEALNEHVRL  
 IHRGDQARFAKLNVLVLSLLRSINANVIAELFFRPIIGSVNMDDMMLEMLCAKL

>SHP\_MOUSE

MSSGQSGVCPCQGSAGRPTILYALLSPSPRTRPVAPASHSHCLCQQORPVRLCAPHRTCREALDVLAKTV  
 AFLRNLPFCHLPHEDQRRLLLECCWGPLFLLGLAQDAVTFEVAEAPVPSILKKILLEEASSGTQGAQPSD  
 RPQPSLAAVQWLQRCLESFWSLELGPKEYAYLKGTILFNPDPVGLRASCHIAHLQQAHWALCEVLEPWY  
 PASQGRLARILLMASTLKNIPGTLLVDLFFRPIIGDVIDITELLEDMLLLR

>SHP\_HUMAN

MSTSQPGACPCQGAASRPAILYALLSSSLKAVPRPRSCLCRQHRPVQLCAPHRTCREALDVLAKTVAF  
 RNLPSFWQLPPQDQRRLLQGCWGPLFLLGLAQDAVTFEVAEAPVPSILKKILLEEPSSSGGSQLPDRPQ  
 PSLAAVQWLQCCLESFWSLELSPKEYACLKGTILFNPDPVGLQAASHIGHLQQAHWALCEVLEPWC  
 PAAQGRLTRVLLTASTLKS IPTSLGDLFFRPIIGDVIDIAGLLGDMLLLR

## 2. 500 non-NR proteins

>E4YGX1\_OIKDI

MNFIKLPFQSNLAVRRRPQLRLLRHARDQALH

>E4YGY5\_OIKDI

MQKTPGSPTRAARRRSEPLHHHHHQQRDEDNVPSSTPERDQPSTSRAAATRRLNLSNSPLQVQDDDAEP  
 NVFALYDMFSLHNAQDQRLQDEILKLEDRIYITATNGIWHDIENNAKITILTRGNKAFSVKGNKYVE

>E4YGY7\_OIKDI

MDAEGRPIDL TMSADLSI IDGAGGWASSSMVAPPMTPSVRRQTQDFDEKDMSTDDLETTLKSTMKVRDEH  
RSFIDDKHDQIVKGLRH CETNENIFFVAEHTI IKDQEWAI EDEITKMMKRELELLKKRET LADILKRYPSR  
KDEIEEKLNEVNAELDSLDDTVTEEPSTDDKAFNSTNESTLLNRTQVSYIKI IHYQEPAD E VVETT V T I A  
AQPTFEFDIPKLTAEHVAAIRSKKVEHVKMCSKEAQTEAPARKKSVDYSSQTPQLQMRDEKSQAKVLAHE  
MAMQTAKPRSGVDAPSQTSVQRNSTVEFTDSFSQTK EIQRKQTKTND SGIDSAADHSDIEATPVQKAVIV  
NQLQQNVNAAPVKKTMDMACDP I VWPKSNYNTIETSSSSDSESESNKTKPGKGGKAAAAKMIKDKKDGK  
KLKTKSCGTNPEKIKKKDQSTKTMPKTTSSKTMQTEKVKNEK MVHKQVNTL FDSR K I A E L K Q K A E D L K R E  
NELLKTAALAQKLKKEERTSSSDEDTKPSKVKIKRVPSK K K T T V E K R A L S T A S M K S T D D L T R D P D S D S E Q  
TKKLKEENERL I A E N A R L K K D R K V S S S S S S D V D A P V V F I E T S S G P P L P E A S E E E G T Q V D R E K V K N A A I L  
KKMKDREDEI VELKQNLAKSEAEKKVLEDKIFDADEAQLNEDELKAEI AWLTSENEALRKDLENGEKEEK  
RKN AFL L K E L S D K N D E V N N F N E E L K G L Q D N F E N E K T E K N E M I K Q L E K D I Q K K D D E I K E L Q D E V A G F N E D L  
EQERRNKAVLLK L K D R E D E L E N E L N E A L K D K D D Q I G E L E K L N D A L I D A N K E L K S D N A N N E D H K A A K I L A  
LKNLADKEKEIKKLSQLQEIKEEKASLENDVEKLF L E R N A A K E E L D E L A N A H K D L M N E L Q H A A D E S N D H  
KLAKLAALKKIKELEAEKKELQEQC D T Y A E Q L E A A S E M S E I D E K S L A D A K H Q N K L L N Q T L D S V K S S V E D L  
KNASFQEDKETE E K I Q A L E E E K S E K I K V I K N L E E T I E S L E E Q I E D L N G E N E K S R D E K L K T L A K I K L L E D A  
QNEKEDLEDELEKNRSNLAAL E K K I K D Q D E A I Q D L E E L N N K T T E I V N L K Q K V S E L E S E L A T D K G D K A K A  
LLVTKELNDRKEEIDFLKEE I E N L K S E N S Q L A K N Q E S E D D R K K K L L V A K E L A E R K E E I K K L N K E L D E L K K  
SQTKIKTKDQSTKTLPKPTSSKTMQTEKIKNEK MVNKQVNTL F D M K R V E E I K Q M A E E L K R E N A K L K E T Q E  
SEEDGAKKAFVAKEL VERKEE I K K L E K D L E K L D I E N K D L L K Q A E E N K D N K A A K L L I A K E L K D R E D E I S K L  
KQALAVEEQNAKNAADPNKITELEDEIAALEDERDRALAKIKGLEK D L E F S K V L E D E V D K K E K E I L A K D E  
QIQAYEETIAENNRKLDLLVLKAAEKVSETEAANETLKTEISEIKEERDELKSELEVRNAQDADSSA  
EGLEGKKPLTGSTKTLDSGIFDKTHTLEDIPLGSSNENIRSEPQMI I I Q R L Q V E N E R L I A E R D S V G D I E T  
LKKEYQDEKAHLEEDLDHQKQLTQLTGELQKLLQDKAGLEEDLELKNEDLQAVEEDLEDVKS L K K V Q V  
ENDELVDNENRKLKELVALKALKDRSGTIDDLENERDELKQALVAHKTVEQLKLLNENGEK L A K L N D A Y  
QDLEAELREKDAEMEQIEEQLQNNKF E K A K T L A S L K A L R K S V E T G D E E S D S S E E E S D I F V D A N D Q S K P E E  
IINDIKKVLVVKGADNRKDIENLEEQIADLEDEDELKAQNEKLEEIRKKHKDEIEKLTEENEILHEDV  
QSRPSSIAIAPIVEQQVQSTNPFLQTHSDIESSIQPDEPKTSTLLRELENENERLMNEIRDLKAQLDLS  
RTEMKFITA EKSDSGSSGDLAEENESLRAEVKRLAALVAMYKGRSDDEVDL R P A K R T D S V P D L L E A D T  
QKNLKEGVLHEL TNTQK L K E E E D K R Q D L E R V D K L N E T I E G L Q T P E A Q Q R L K D G A L S E L E R E K K R R S E A  
EKELEKAKNEAELAKELKEGALAEVDRLNSSLISSKLELEKTDKSSSRQSTP I P S K K L D E L E L Q T M E N  
EVQLQALRPDASELAKKSPEEQDKILEDLKKTLEAKARDIAELEQEIEELKDENKELKVEAYDAQNYKKK  
FKKAVDEKHAQGQDLEELTPGKVQFIRNLFFTRTILN C I R R L S D S L L I R I P S P E G R M L K N N D E I F V D Q  
EKLSQQKRPVDDNALWNISKMKRDMRQLQAQLRELDDRNSTLENKQSRAL E Q T D I L E G H L N R A S R E Q S D  
LLNMSISSNRSLDRINDSMTDQMI R V R D E M R V T D D E N N R L I Y E L D Q L K R D H E E T E R E L R Q A R N K L V W Q Q  
KEALREATSKPNVDDYDKLMSEYTSALDKIEKQEEKLEQASVSSKADDLQSHLDQSRAECDLYEEEEIG  
ELKKKISVLEAKLKSSGRQSPNSEIHDISLGD SL V E K L D N L E I K E D W T S E E R L K L E M V N E L R Y I F S E P E I  
VREEVSGPSSLESSSSSGKKKENIDVLKESKETIRLLQSALEKLADESAESKDVSSSELKGLSDQSVRLT  
EQLKKRQDFIDRLVEKYKSSEEK V R E F I R S T M R A I L Q R E Q D R I A Q R V S Q D E S V A S M T F D L

>A8PAW1\_BRUMA

MALALLSVNICQFSGCGLNFGNLHDLLQHIEETHIPI I E D E M K K K E E N A K N S S L D D D P S K A A A L T A V F P I  
STICKLFSKLP PHKAVP INPEPVKLAIGHYRKKTLASAVVGANVFGQAGDKSRFDQHDEESNDLYRNEDC  
DDYEQGTDERRHKCPVEGCNKRYKNLQGARYHARQVHGYSEDNGTNNAVSFDLTAVVPGQVAPLIQSGTP  
SKYANLRPYKCSQCSKRYKTTVGLNNHVQQSHQRINNAGNPAMSTNLVPVSPSAVSI STHNNVASPAAS

TYVTPEGDEHVAAPSGYLSTVQNAQVRINTQPLPSLAPVTGQQYQQQMSHPTNVTKLVSTVNGMMTRN  
MNALSSYGPPTSESLNPVISRPDTPQVTDFCVQMNRH

>E4YGY9\_OIKDI

MIVRNLKSVLSGHINRI IREYIDKDLPGVFKPLTDYLYVIVGMLMTVAVQSSSIVCAVITPLCGIGVISL  
ERAYSLIVGCCIGTTTTGLIAALASMGDGAESMQVSLAHLFFNMVGFMLWFVPCARRLP IRLALWAGA  
ETEKYRWWAFYI IGLFLAFPGLAFILSLVAPIFSDKVIKESYSFQNALTFAKLYKLCSGNVYFFLNSIE  
SDYTPKYKIQSAQAAPKVFLKQAVDSVDIDVDVDFGRGKKKKKNKNKNKLPKPKITTTTAAPTGTG  
DKFTSVSANYDDYFYPEKDWKIVETTTTDRYEPTTTSWPTPALVYTTAPQQLKPVKQYNLPAGLQLP  
AHLNPNAGVFAAPKPDFAISSSEDEYEEEEYYYDESYSYDDLGMKKPTKKRRRKRKKNQKKKNQKN  
YANYQNSYSQPAFECWECLSANSFEDCQNRGKYVCNGGSGICDITVRSRRNNRYRDWYIEKVQMGCKQM  
QSCQTEHQFNFGYHPQCFPEDSTWPALLQWNHSTCRQCCGTSKCNFDWIQNKPDTTAEWNSTDTHVSGY  
GNYNSNSNTNSGSYNYNNNNYNSQNNNNYANNAYNGGYNG

>E4YGZ7\_OIKDI

MSDGVNRNNIGGSGSKSSIRSKKPDNSAFKQQLPAWQPVLTAKSVLPIFFIVGIIFFIPIGSLILVASN  
GVQEVEQMYTDCQAQFTTTHPPTLADITDVSADKESCKTIYDEWIDTFSSGTAPNGNPPTCICKQNF EI  
AETMNTPIFAYYRLTNYQNHRRYVKSRDDTQLLAEKSYISTEADGDCSPYDKIGERPIAPCGAIANS LF  
NDTFFIRRCGDAGVECTALQPDNIIDPTDANGFNAIKMTGEDIAWKTDKSQKFDPNKETGNETFLSGTER  
PLNWRDTHVHKLGTADDLTYRHLSGSSGVFRNEDFIVWMRTAAFPTFRKLYRKIQDNGADLQPGNYELL  
TYYNYPVHRFGGKFFVLATTSWIGGKNLFLGWTYAIVGGICLIVMLFLLCISRRNHNRRSIV

>E4YGZ9\_OIKDI

MLQECVFSSTIRPTASGVLSSVTAQLQIFQLNTQILSR

>E4YH01\_OIKDI

MSIAELNRKLDLEEQITEKNIISLATAQTKLDKIKKYANVDTLFKEISRLSHLLDLSCAEMTPEAMDQL  
AISIEPIVKQISPYMDKVQSLEKYSHIGKLENMIEKKKDIQKLARLNSLQYERVQNLGENTGILLAHYNA  
IIDNLSRDFAVLEAQLSELEDLSP

>E4YH05\_OIKDI

MIRFRRAKVYDFNRMPCLKLIALHEFLVKQDARVIDELYRHPATCMSVFRELPAKHIIRILFINQQI  
AKPLIESWVADEHREKFEVAMEIITGLRIWENTNDGIAFNLNNSFRTYLQALFGGGETWRPAVETLGAD  
KNAKTVEQLDYTKERWDQILSFLTQEQQKLSSEVISLLKYAGLCDANGEKRFQFLLDRSSQVWYLLVQ  
YLGYYQKLGSLVNVLAFVLQLGYCSFGTDYPCDNSNEISRVIQHFREMGLIFKRKSKEQRFYPTRLAQ  
SISIAAGKKASSEDVQEQLVETNYRIYAYTSELHYALISLFAEVQYRFPYMIVAQMSRDSIQQSADY  
GISAEQILNYLRSSAHP IARKNKHWPQVVEDNIHLWCKERERLKFNDGLLYHQFLDQEAFFEMLSYAQD  
IRALVWANDERRFMVAPWSDQIKSYKQIKDGM

>E4YH09\_OIKDI

MLDEMHRRKVEKDIADLKKLIDQHFVQRKKDEEDLDSLGRRIANRKIVRDQQIQARNQKPKARELALE  
KDKREAIENRRKAEEEEERKATMAAIQYATSNPKKRLQKKGKNQEKKKILAARRKNGNIDHLTGPQLAE  
KAQEFFKHFTIENEDKYNLEITLQKHQYTLKLLRQRVHDLVGRQNKINTRK

>E4YH11\_OIKDI

MSSDDWTIVTRRSRLAANASPEPQKELLTRNSFESLTDSSGTESVLNETPETKRGPVMEENDPTSLHG  
 TPPPEATDAPRAKSATKTLAQRVLRFLGRSGEDLQQRPERIQFKVSKKSTSKSQKSKQFKKGRNVLTKK  
 NSRVTRASMKNAPPQSDLQTDLPAPASSDSSDFDEEITAPCPTIDELQAAEVTITGHSRPVNDNLAAVF  
 GPKEPDSTLSPFSAIKDHGFGSYATILNDIDMEQEHETEPGDGGVDTQFRVVFHGLTEFFQGCIFPQLQLH  
 FQDQSSDSSKVQLALFTLMAGYLSIIMPKRSLSFTSMFYCTCILTGAESHSHFRLQRERATRGLVDVFS  
 RLLDVNSLKCHVEINDDDLTTATQELLDSTALLPDQTVLKQSFENELRADLMLIDTELVVNAHLRQVIL  
 SSLYVCDALGNKDAELGPAVSRYRVLKALPFHALQVLMNMEILKCDRLTLHPSEVKEEFFLPYLEEVV  
 KLRSDPASQQSDVRYPIPAFNHFKPLAKQIIQERQRQLSSANIEQPEDPTGSGIEVEESSINGSDHP  
 ESDSASYFVQFDGPTVRVFGMVEVDPRLIHRLTQSRLDDHFFPAQESDQTDHLANREDQPSPARASPTTE  
 TTENQVHNGDDLKPKTLPNDIIPHGTGAVQRKRQNSGADHEQFSKHPRLRASPITAPTSNTSHMQSRP  
 IEEPICSTDAGSSTNTQIPETSLVEAMKSTSLTPVSSTLPLCELGPAESEAPDTPQTDEVMIVVSG  
 DEVVPLRNLNSNAVGDSRRSVRSWGPSSKPTLLLRTSHTREKERDPERVKLTMELLASKNFLAVHHREP  
 SDKEIDDSILSSFKYIQGQVMSKFSDAELTRAHRELETAEQSPENQLAFYDLWLPKLEIEEYVQTPVL  
 RLGLFQSGYFDHHSKLRPLNDNELSNDSTVFGRVGRSPALAALKKVVNHLILDHPKVQLQTEVCNTIAL  
 RSRTQAWCQSIPTKQPSRATAVFPACHSLSCLTGGCLFRSSTIIVGLYDDPCLDLLAVSQRLQHCAAT  
 GELRMLTESMENDKELCELVQSRLPFLSTVLSGNSYLAPRHPNLEPAGEVAAVTICGTERTFDHSQTYLN  
 LNFAPETQDINSPHYNDYLRRYALLRICKQFGFTVIDHPASGNMKVELSSLTPPVANTFYQYVGLLTRG  
 SPTLTTIPDNTLAAQIKLRPSSPTQKIPSLFSTSGSAPEAITRGIISRHYTHFPSTFLTEFSKRGPENL  
 LWKRFVDVQLAVYRKGPYAPGTSEASVLEEVQIRLARMNPFRCLDIADRQSKLTELNVVHNNEEELN  
 YFLKHVFTPDVCGQTRQLCPVPYCCSTTCSNDVDFGSRFQAELEDDYRHESEDTAKVPRHWKDVFTA  
 GKVVHLAEAAACRLIDQGRHRPVSTGLESLATCLRSPPVILSLQENDWSYNDMLRMGVTFMHVVSGLYRRP  
 SKSGGTRKPDTKYLPMAAFYFSNRRSQYFISLKEIIPTRLSRNYMKLLN

>E4YH03\_OIKDI

MFFLDDFLELLEPFKNEFKQDIEQIGKLDDEEAASFQRQMDKSNEMFKRCQIKDKQGVKNIQEDPEITAM  
 LREVVNIKNKAKTAHEKLEIITEISSKVDRYVRRCEDELDFAKNEIEAEQPGITNLEQRATDNTPELQ  
 RKNSVLGSDYEDYDEKQFKHTTRKKTSSASRARRPSEKDALAAASALESAAPSMLRQTSVPERGRKNSVS  
 AVRLDRSQSVGAPPKAMRLDPGIPTTSAMSTVEVGVGVTVPARTKKLTPKGVYRQAIIVSKTSQLDNG  
 FRVPLTESYNTGSTQIVQLPSTSAMHFVQTVAAQKAGEIPDNANSSATQISPFKTLQIHPGMIQNKV  
 QD

>E4YH14\_OIKDI

MVLSRAIKIWSNLALVIEAYSDEVRRRQDDLLKRSNFHVIHPVQVAEDGRILKKNVLITSSNRRRRHVSD  
 DQAEFEDIFYKVKINGLEHRMELSRRDDFISQNFISIQFESSNNIERYGNRYQHCHFSGRFSKRKEDDHP  
 RVALSNCNGLQGFMRFGNDFLEPLWNTTKEEHEEHPHVMIEKESFMQFDDVNISSGDSCTIVEDDEH  
 KEKTVRSRRSLNSHRRYGLIESHENIVEAMVTLDKRVVMTHGREYVDLYTQTIMHIVSELYADPTLGNRV  
 KIVLVRIIVLVEDNPDALVHRAESTLRFCLWQNSKNIDSGLADESGILHHDNAILLTGYNICSQHDIP  
 CGTLGIAHRNGMCDPQKSCNINQDVGLGSAFIIAHEIGHNFGMHHDGYEDGSSKSCSRDVKQIMAPQIN  
 SGAYPFSWSRCSRYSINNFLDSGEGHCLLNPNMNGLAYTNDGRSGLVGRFTDADAQCRFIYGPTSRHC  
 MHGNICMQLYCYHSMKICITNGIPAAQGTTCRILNPSYAEKGVGTWCYKGEVCPDGFQPTPVDGRWNSWS  
 GWSHCTRSCGVGVSYQMRSCDRPRPAYGGKYCLGERRRYRTCNTQNCNPEAQSFREKQCSRYDSKRFSGK  
 YYDWVPHTEKVPSCSLSCKPKDESFFLELSPQLDGTTRCTNDPEKFDLCIRGGCEEIGCDRSLNGNKE  
 FDNCRICNGDNRAKCLITKNVSIICDDDAELDSCDREFPLSLEDIDKFLIPAEVTSISVSQKEGDKNLILV

ETGMGNRVIGTEYFENCENCKNKMIKYEAI SASYFRVLMKEDFTRTWGVSSYGPLQAPMRIRLLPRQYSI  
 NLIVTYIPIKREGTLGSLRWKFGNWTCESTECGGGYREKVPLCHLKAFPSDEKIVDQEKCP SATQPDI  
 LLESCNNQACAPVWHMSDWNCSQTCGSGFKHRTVVCRRIDKYEEVVADTECLSDKPEYFQSCNTKRC  
 PPIWTIGKWQECNPTCGRPGWTRHVNCVDSTGTDPEVHLDSSCNQALRPSRRKRCHRPCPAPQWRTSE  
 WSECSSECR TGS MTRNVECVMRDRILPNYRCNMSTKPVSSKTCKGECMQPVV IDGNDDEELCVDTPETT  
 YCAMVLRFDVCVKSFFRTKCCATCSAQDDL R

>E4YH19\_OIKDI

MSVGDVQFTFPQVNHQKQPGTVELSMTHLKWSPDMIGEVVLEIQKVKRQKISPEGKSKVQIQLELTDGR  
 SLTFHFADDDPKATRNVKVAHLGKLMGKVLAKKVDKNLEERKRVLQNNPNLVKLYKQLVTTGQVTAEEFW  
 SSRAHMLDSSHEQDIGITADFLSEVKPQSDGTNSIRYNLTPEIVKVI FRTPAVKKRYLEVCPTELSEKD  
 FWTQFFQSQYFHREKLAGEDEKSI FANCDSLEDKELSNQARNSLVNLERIFDMYMEYAENEITQKLN  
 KKQKAALSKEAKLLVKRINNHATQVLQSCQKREASDDTNGVQAKRMADDVRAHSENIDLTQKNETTA  
 VPCIIVDKESFFNWGAEDDKKSI LNRMDKQVLDLKI HLEEKLNRMNNIREFEPKLD SMEDDYRENEC  
 SQMREMNDVMNIVHVAIFNLVVFALVFCGGFIQSEYSFYWLISDAGLPSNISVTCANNATLAEC DVYTK  
 DVVQVLARYGEYSALCSFGTGMVGTIIGTVSDVIGRKKVLVANKLGYFISII VCTFITYYHLHPYYFLIP  
 STIWNLVGGYSVMLGVT FATVTSYSPDEKRFWYIVAADVGIS IAGLTVTGIGYLINTLPTENYMYIAVG  
 AAVMVIPLFLAIFGMKENVLPPEIAALDKLKKCFSDIKEIWFRRSHLNKFLWL VLVLPALDKLV SFGTSS  
 VTNLYLQSAPFAWDPEELSMYISASSLLGILSFILPGVFRHFGISSFAI IYLSLLMNIGRNIMFGKATST  
 VMIMCTLGFNVLTGSYIPVIRNLLAMNTEKHNGAVFAFLAALEANCITAGGLLYSYLYHEFPVDTSWLF  
 WLLSPAIGAIGVFVAICAHFVYVEKIKFAEDQRCLINEIDDSASESFR

>E4YH20\_OIKDI

MSFHLPKILYTEQKQLPPPLKDYVTLNVTQDEIVIHHRICAASLRHPQMAGSMNKTHKASMSDFLNYGD  
 LENKIVDFWFGQPTLDIVKERAKGNIDFLNRLPEEAKIAILTRIPLEELPKMGLLNKEFAELCKSNELWEK  
 MCEQNGITIDENVRSLGLQIGFKKIFFSNKVEIQRHIRKMKKQSTFIT A

>E4YH22\_OIKDI

MCHNFVPLVNVQEQSSNEEPNSDWG SYLTRGLQSAASYLPSGVSEVLQQGRDFATAKLSHSCGLKNISTIH  
 EIGRKYFLVACSDGHLVYVEIDPSGGECNLIKQHKLCLPRVPEVSSEESDLPPMIHTVDS

>E4YH28\_OIKDI

MRKIRRKI INSGTSKSDSYSKAI GTDSPGIERIRPSRAPPQQPISEESSSEPADDRQLLDYLLTKRKSEY  
 SSPCDVNL LAGSFNVNGKEPKEALDHLLRQNETPDIIVIGIQELQLDADAYFSEYVNAKESEKYQKQCE  
 SWKTSVMLALQKYNRPFQLIVDERLVGMYIMIFCSERIKPAISKVDTANVGCGLMGTFGNKGACSVSLKI  
 HETSFCFVTSHLAAHQNAIKRNQDYESI RHRTVFRERLRILDHERVFWLGDLYRLDIPNDVRFICQG  
 DDISSLLPADQLHAEMNAGKIFKGFHEAPITFKPTYKFDSTNNYDSSPKNRIPAYTDRI LWLTKETDSV  
 ECLSYSSHPSITISDHKPI SACFRVRTEQINKQIYYSVYKEVNSWLDKHENELIPQVAVSSKAIDFGKLK  
 FLERATANIQLQNTGKTPAQFQI IDSKVFS PDRDVYEFNSNIGLSIDPNKGI LPPDSGDASICTISFDL  
 NINKEVVS KFNFGVKGGNYVNLDDLILILKLRNGPDHYITLSGDWTYSAFGMPPIALTHSFFKDV SIS  
 SLEYPATCLVNLQVKAECSSNSPSEQLHPPAFYVLLNHIVNHGFMERQLFQINGDPDEVRAI IDTID  
 AEEVVG NLES LPGSVASVAEVL LFLNSNPFPIIPYSHFELCTDLVDDHNLCKSMIEKLDLRSQNNFYQL  
 IMFLKEVLKHGKINGCTSEFLAGLFSRCILRPQITLKNREKADLEKRKSVQFVRQFLNEDESSLI

>E4YH30\_OIKDI

MSEFGGRMLFSGANYRRDHDQVKVNPPLSEIGYLTRDDPKNPSKKYRKNESAGEIGWAVENLCPEEQQKPT  
NIDGKFFGFTKGIARRAADLRASHRHQSPYSEPLKTTKLP SPLNNTKPRITNATNASP

>E4YH32\_OIKDI

MVKYSEVPMGDKSDLRLTDGQEGREIIIVATWLRPTKLI GLIDLFLALICYFLAEILRSWVHPISDEQR  
EYYYQGLWQICSVEDDLNRCIVDPDSCEEIEAECAFYNSAYGLWTRIIFTSCFLVAFVSFIAGIIAYSN  
RERKDWYKYLGWILVLTSLFVLVSLTIFPSGFI RNFPHYTKWFFGLGYGFGWAALCLTLLAGVLFILGHG  
QNKKKRFVAEKRIRI

>E4YH33\_OIKDI

MTSILESrvVGMKWLAFSLTLGVDSRSHEKGSRWALKQQR IELKYEANVNHMQSVDAFAGRSGPSRPEG  
PTLLDGGWTPCESNGAVSKKPGKKQTKFHTCVQKQGFEDVLKCVNWKGGGEERSADEKCKNACREVVV  
EASKKNLVKAVAKCTMDNLVNLKQKKPETLATNGVLMFDDDEFASSGAKKPTKLTSSGKSKSPVNRGP  
GRPQSESKGSMTFGDLPELLELFSDDMEDFGEPELMPERMIAPQFESPKSSPNKKGKGGKGRGRSG

>E4YH37\_OIKDI

MKRINFKNKI IYIFALLIIVTVFYQAIILAKFSDVKQARKYIEENSKTCDICADCATFSQKNFTQEKILII  
PLLWVGPNNIQGFRESLYIANALGRKLVAPPPFNWNHLANGSSLIHPWNRIDTQLLSKHYDIVSPQKV  
VEICGPRIRLNLSTGIVSYNPNRYSIFKKYGLDWSNAFVFPISDKTLSPEEENRPLSNAIDKTYLNSI  
YKSDEKCVILEYPWNSIPAYDIFVQLKSQKISEEYKEIVDI IKNTKRPAGSKLAKLKINFSNTINTIN  
MQ

>E4YH39\_OIKDI

MQRNCAQKVVGGEGSGILPEVTSGRVVVPCELERDVLLASSEGSSPMPREVFLNSRESPVDRSKVRLTT  
ALILGLALLL

>E4YH44\_OIKDI

MPKDRNKPRGRTTAYGYFVVDEKEKHAKANPGVKINFGFESKLCGQKWQTKSEEDRIEFKASEDKIRY  
EEEMASYEPPAGTKTKKRKKDPNAPKRPAATAFFLSTANREKAKAQLEEGAKVGDVAKKLGEMWKLVSA  
EKENFAKIAKESKAKYDKAMEEYRANTPKESPPKRKKKKVSSSEDEPSDDISDEDHDY

>E4YH50\_OIKDI

MSTSHLQWAI INKFSAFDVKRAGRTWTKEPGLNGRKSRLFNLTVEKKGLKVAANAEGGVNFSAGKMSTT  
MKKSSRKTFKSIRNVAKQGAFRKDQTRAAVKKASAI IASQKRAAQK

>E4YH56\_OIKDI

MPLISKLPSLDLKKVQSNPMFNSPHGGAMGSPMMLIDQNRLLAQHQLQQQLQQQMMQHQMQLAALNN  
QVMMGNPLIAQQGLNPSLPPSGYPAHLFQGTQPAAFDESSSTVQKIIKIALTNKSFII

>E4YH66\_OIKDI

MKLKNTIFIVLAFACPDDDLQKECINLCGEEYSHCGENCN GELNCFENDFCTEKYSSCVRECPCEKNCP  
GCVNENEICKRAPFLTVIGDQAFARSSDLKKIARLDDCEFKELPVRLIDRFDSVSGALLSFSNRVYLC  
FFNYPPYKNCEEFDGISSTNSFLITNHVHCFGGLGEYKNQMVVLGAGDLPQEVRRKVEILEIGGWKEISD

FPVDITVASTVTVPEGMLVLGGWNPWISGGIYYKSVYLLKNEIWSFVGNLSEPVSDSTVFRMSEWIIILV  
SGDSENNFVERFKWDEEQIKELEIIGENPNTILNPVQSSRNFCNTV

>E4YH68\_OIKDI

MKISSVFIPLSATNGQKPAELKVFKTQSKLEWVIDTFYAESFPKWSRGMKAKTKRVGLKLVDEFKRRKQTE  
MESECFEGSGDGPQKMAVEIEQENVANLRFVQDDPCRGSKQLTRNMIKWANENILDYGCDCGAPKEEQTE  
NGRKDRLVKKWEKMQRFFQTRLQCE

>E4YH74\_OIKDI

MIFSISLSFFVKTTLKTSLFANPVVSVARLWSFKDEQLKGFNVNSIGFN SVGPEIVAVEYGHSSQRAKGAS  
KIPGIMLGELLLLKVKRTSKTKKNRSNTRKTDNAVISQLSPATSFNFNPTDGNT

>E4YH77\_OIKDI

MTEKEPMLMCLRHTGRNHGAIYWGKYNVTYEMFPPAYKYPDYCNGQCAVMNRKSLEAIGAEVGTKYLGDF  
RIEDIFFTGILREKAGVKNLQDFTRTVSELTSSSGITKNVKTCTMHYSKEMIMTPKAHLIDDRFYPEMP  
TGVTTKRMFEERKNFFKRIHREKLEKTKLEHEKKEKKAKEDAKAQLLKERNLEVAGIAPQNLGFHPINW  
INHHFVRKN

>E4YH78\_OIKDI

MELKISDSTDPETGKPMYTVAWSENADGLITIVMTGKADNGTYTIYVENDHDSPPVSVHINNVSYAREPD  
REPVTLTPTLIQKKIAPSNTDIVVIYAFAAQGEFPIIFADLWAEVTFPLERNGTIMDTETVILTDDGKHD  
DVIANDGIYTGIFTNIFETGRYSIKVRANGDNGKAVVSKGHMLGIGELDDAEYEVVENAVHKEVWQTTQR  
RKRNRVTRTRDRREKEDEEYDYEEVEEEKSNEEDTTVAPIITLQTLVPSNQDKREYKQLEVEKLARTT  
RTSAQDTERVTNMDTIIIDTDDSDLCDENFKHFDGFCYKMVLDKKNLHPEAEAAACQAVGAKLIDVRSLYV  
AEYFLKRLRNVIKDFWADAVNDEFVKYLPRLVDNSLRIQEIQALMKAEKMAIERRIRKEDEKNPLARM  
GSIRQFRQPIFERDMKIYNNVTSNAQPPAAFIKDFILQKYEKSIDYATLSQIEEATASWKLNLPKKLDH  
FLSETLDFETFEAQSRFSRAKRDLITVSSPCRYKDDFNRYRKNRKFACNSERDVICQKITLRNVKREI  
SSCEATWSDFASFASSEICYHQASKKHNFAEAEKYCKELGGSLLRINCENKEVFEIKEENLDSFWISNM  
DTSSLNELKCSQTIEKEEEESENEILYLP IRIDQKWP IRNIGQIHPFFNQSEFKEVDDEIYDDDDNDNA  
LDASDSNFLSDYTDPLQGDVYYCMWFENGAVNEVYREGPCLNLKSYICQKPKNDLLAPGPITDIDVQHF  
VGSYKDPLGSFHIEFTATGNDQSIGQADRYEVRMVATEKGKEALREDFDKGYHLQSDSFSNEIDSRPDRP  
KRSGYLERQTI RFEDIASCPRNQLMDLMVLVDTTVMKLLY

>E4YH85\_OIKDI

MQKFLFLIFIAAIKAEKRCGEDIKEISKDGMSSLHRAVHPLIRPDLECVKQLLQKQADVNLTQTSQGSTSL  
HLLFKGASDLKLTAAVLDLFLEKSADLEIKDENGREAVHYLYENVKISDEFKAEVVKKLVSEGNHVSEEM  
PWLGIKLPFLEKKLELLPGPPIPA AVKAVFEAENERFDRIKIAHCLAENEKQAAKINELSVNTELEKQA  
QNLNRATEKIAELEVELGRFREVVLQSETKLDKKEENIEALSEKNKQQAQLEKHLEEMRLMRKIEELE  
KEREVMQKKEAEELLEKAHAKKEALEASANQFKAMLRADFEQESAKFEESLQNEKALVGLLSGELDAAKMQ  
LASAKNQTSSKNVTTDVSSCLNDLDEEIERLTSEKRQIVAFILQFLAVYVFWKLGRKFFKKAEDPEH  
SEIPSELSRYIEKLEKTLEYNRGLQRVMNLSLDRKDEKIKSLETSLRDQSAMLFPSETDADETTEDPSSL  
DSPLSF

>E4YH87\_OIKDI





VAEGDHGALVQDIMESSKNMSKAANVKDKTNKISEAEQKKIEQQIGKLKADVQAITAQLPPVAHVLDLDFQ  
 EDLDAMSLEYDQWSAELKKNNTLLNEAQNRNHNANLDSLYSQLNRFQRETEQREHEIMSTRQQIKINEDRI  
 RKQMAAVCAN

>E4YHA7\_OIKDI

MTVVGEIAHHTADI IAFWGFVYIPWFVVISGAGYKLSMNKRLKSREIKPAVRRRAVENTVLIHNFDDQHD  
 TLVDAFRAATARFGSRMAIGRRQLLSEDELQPNGRTFKKNTYGDYQFKTFSEMETLVNNTAAGFASLGL  
 KKGDKIALYMETRSEWMIAAHAAFRAGLTVVTVYASLGEDRVIEAIEESEAKALVSSNALLSKCVKPVAD  
 AMQGGQLVHI INCKDENNKPCQVDASITITAFGAISQTDASTFEAPEVSGDDLAVIMYTSGTGKAKGVMI  
 LHKNICAAIGGLTSRLKLSGISFDDVYIGYLPCAHVLELAAENTVLLNGSRIGYSSPLTSDKSAKIKT  
 GTMGDARALRPTLMAAVPEILIRKKNVDQVVKQGSQAVKQAVFKYAYNYKLDQVQNGGDSPLNRLIFKK  
 TRDLLGGRLKAMIAGGAPVEAKTQQFMSICMSCPLVIGYGLTETCAAGAVQDAYDISSGRVGPPLGCTEI  
 RLIDWEEGNYTINNEPPQGEVLIGGPAITAGYFKMPEKTAEDYCEIDGLRYFKTGDIGEWSDGALKIID  
 RNKMRHGEYVALGKVEAALKTSQAVANIVVYSGTILMPIAIACPVKVLDDWAKELGVEGDLVEICKDD  
 KINKKMEELQATAKAANLSKLEIPNNVHIDGNFDAGWLPDTGLVTDFAKVP

>E4YHA8\_OIKDI

MTVYHDEIEIEDMEFDEETEIYTYPCPCGDKFEISLEDLQIGEEVATCPSCSLLIRVIYDEDQFADYDSD  
 SEMPAFEKLLKMRADQIFGVIKDGVQEFIDGWDFIGKLGEGAFGDVRLILNRKSKIKCAVKIINCENMS  
 ENQKKSQREKNIHRACKSHPNIIRYINCRYEDRLKAMFIFMEYAEGGELFDKLVDPDIMGPEAQAKFYFK  
 QLVNGVAYLHKKSIGHRDLKPENLLLTRDGQLKIDFGSAVVAVKPKTKRRRFDSDTNRVGTAPYMAPEC  
 FLDHYCPLVDIWSMAICLVAMLSGQLPWSKADEDEDEDYLAYGRQQFSDDACWSRISVPAMSLIIQMLK  
 FNGEERAKIEWMDEKNGPKWLIMDHKDDVAFKYQHQERVVYKGGKFEDFYGGKSSISQPEMLTLFGTKD  
 NLTKFDEFETDEPFKYVLKFNEMESSTQEVEVGGQDSYSQPLDDISKDVLKGEKHPSDRNNIRVPRITRV  
 WFEPHKKTEIIAAMLKYFISYSVEQIPEKYWSFESPVVKLEVRILKTGDVYMLDCKRCKGCGIHFKRLF  
 RDFRASVEDILAKKKIQPQQILTFDETPAGIIPQVPAEDGNEENAMVNSPNDKSSKHKLEDNEHLNPEP  
 QAKRAALQEA

>E4YHA9\_OIKDI

MPEISLKRNSSSLPPRPLGPRRFRGKQWRSEPNPDSVLESINPVSISSPYRSSNSVNSADKNQNNSLP  
 RKRKVVAIRPKPDELELNRPTISKDSEKRVAILSEVVDTEQKYVKYLETLLELFIKPLKSLRLCTQQEI  
 SQVFCNIEEIHVVSPNQAYIKFMTNYASNESSWKNLAARQSIDDFLTDAYSQLSREDPPIKQRVEDMLG  
 TIRDRFYKYKMFTERLVKDTPEHDDHKEILKAEREIGVILTRLDREVKIAQKNARNLVLVSLIEKAFEN  
 DFSASGLSDEVRLNKYLSYDPITITQTSKNRGTYLWLFNSMVVISQISSKQTKLTPPEVHQEFPEVDLS  
 HKYKANDYFLLQDTSLEASKSQDQDCKLRSQKEIEILDNAIEVLEEATRPDIMQKQELKLLKDKLEK  
 ELRDLISIQHNTSIEIEVNTAEKLETIPFEFQSIDPQKRYDFKLFEEAKKESIGSRRAGPTMSHCLPLQ  
 KSRNGQDPSAAICVNGKMWVLTSERQNSQICILNESKESPHYEICDAQVNSMCHVMASDHRYLQRARN  
 DSDSDSDESDCGVPLSLASTNQYVDDCVWLGTDNDRVLIFFETEEDAKRKS PRATINLDAPVLYILVHE  
 GHVIIISIGTTESAAALCIFSRSAGWKIDEWTTFSVAKDLCDRERKDEFLEPMISCGFSKMFVEGVGGFK  
 NEVWAASGPNIFILDTENNYKIKKVFDAKSETSGSRPLQITAMASSHGIVYIAVDEKCKLYVLDGGFRS  
 ELDISPIDLDSHVNRLNAFSTGKDDIRQHKKNRLRIMCLLMTSSYLWVGTSAGVVLNIELHSGRPPTH  
 NSQQLIQALSHGHTGRVLVLAALAVNKTQMKKKQAEHRRRMSKTAQKKIYLVSAGEGLENFTQNSCDAI  
 GKHDATQHLIFWSRA

>E4YHB5\_OIKDI

MICSCFAVIASLFAISAHSESGQVVRVSTSRFRKSYKNEYFEKPRKGACVNSKWAYGTSCILSLICTGS  
AGFGAYLSIIYSNKAENSKTTGIHPSVQQYLGIESLTNEISILRSCLFIECACQGFLALMSLYNVLYCGR  
LVIYHSRYFIRVSQEEHVQNNSEIDASGDRCPSEHLPHATYSLPTTNDATNNYADSVFLEQGPEPSL  
VPLSSCLGYTNFGPEMSRTNSFGSGKSENASESDSTQIVQPSAVRQPPVKIAPKVDNPLPRPGNSLRAA  
GRRHRPEKSVSFRGTALVAE

>E4YHB8\_OIKDI

MTMKMELLIKIFLLAQLANVSAQQKKECRSQAGGAGPEIKYVTSEGYPLKSKAVEECVWNLQVNYGQYIKI  
VPSTISVPCAGGGGVVFKELLKDGKKERAVSSKMYCGANTKIPAITSTGVRLEIYFKAPPGTKLKIGYKM  
TETSGGTTVAQAGGARAVVGGSIKYNPHSKHPGHSRSTSVLSHSREIPLLGSKTPPPKVDERNPLVFL  
AGVVVCGLVGALMYKFMKDEQLAEKCPGEKPLEKKAETKEVSNSAARTCSQETTATNISSD

>E4YHB9\_OIKDI

WNHTERCLALLKSSLLGCSHQPKQKSKNLNHYSKMKTF AFLAATAALAQQKNKNNYNNNNNNYNSGSAYG  
DPHFVSSNDQPAICFDYNPEANTQIELLRDPATSLEVMAETSSSGLNHHEEQVIMSKITLSTPSGAKIT  
MDRDGLHLESAASDVAGEPHPTGVFEYADAQIVEHKGANGGIDRAHIQVGEAVFIIKATKKGSMFAIR  
EPQGLSPRSTGLIGEFLEPNAYTVKFLDEDNAEII LGGKLDATKKEFHRAAECWVEDDLAQFNDLIKE

>E4YHC1\_OIKDI

MSYSDFPSFH LAFFEYLKITALHHCPLLPFNFNATVVRIYY

>E4YHC5\_OIKDI

MESVLLDDWSLIWDRTNWIIQLKGINGEFEIESSPVEAVLGPVAVVQGHSLYKLGVPKNSCDWIVPKDI  
RDEFSGKFPKEWVVKITALQERRVTRHTPKREGPIREKSSTLSKSSRISEKMEDSLYRGM SDKQKERARK  
LDRLRALQKRFRKFLNLIFASEALLTPHFVFRVEFPYLFSEFRNNI

>E4YHC8\_OIKDI

MVCVELTLKQIEFLLVRVEQIKQDENNDDFEENLRNRNTNLIESEIQRNARGIVIRCGDATVKGRIAAL  
ASNVDSDGTPIAQIEIEHFIHIITGVAVFLGVTFILSIFLGYKWLEAVIFLIGIIVANVPEGLLATVTV  
LTLTAKRMAKKNCLVNLEAVETLGSTSTICSDKTGTLTQNRMTVAHLWFDHKIHEVDTTENSSGDTAGD  
ASESALLKCEKSMGNVEAIRASNPKVAEIPFNSTNKWQLSHEVEGKNLLVMKGAPERIVDRCNKILVN  
GVEEKPADFQTTFENANAHLGGMVGFDFTEEMNFPSEDLVFGMLMAMIDPPRAAVPDAVAKCRSAGIK  
VIMVTGDHPVTAIIARQVGIISDGSKTVDELAKELRELDSDLDEILRNHPEIVFARTSPQKLIIVDG  
CQRAGQVAVTGDGVNDSPALKKADIGVAMGIAGSDVSKQAADMILLDDNFASIVTGVEEGRLIFDNLKK  
SIAYTLTSNIPEISPFLIFILFSIPLPLGTVTILCIDLGTDLLPAISLAYETAESDIMKRDP RNKSV

>E4YHD2\_OIKDI

MNSEDKTKPKTIKVKEREFESSSSSSSDEGIQTRSKTMNKIQYRPTCEATLGGFPKNAKLTPAQIAKLQH  
DHKLATEIFNQFFNPQDRTKKEEKVKKTERKVKKEEPVFGDWDLNVTKANEVEVKEENLDFWQDMIDE

>E4YHD4\_OIKDI

MDLETVLEDVEFEVEEYINETELEQTYAGPEETLFPTVPAPPPGLAPIPTTLHYFRRLF IHIEYFFVE  
HWGYFLIGFIFLVFIIVPGILLQVYCDRLYRKYKREQITRKILEYEAEMERDGAEDNRSRRYQASLE

SSSSSEESYRHHKGRRSARKSGKKVRARSRPPVDRKKSPEKTPESSPVAEKPPALPPKESKKEKQEAKK  
 QEEEQKQGSYHHFRHNGKARFELIRDSGVSMWDQETREIENDSRLQSAENSMPFASTSQKTVNALPYPD  
 QLDHFQENELSNDFPEHNYQETITASTVTDHRLPTMREETAPSSDHRGAYWSAGIVSQFNGARTPPRPS  
 RSRPEPHNSTQITYDEIREMKQVMPHDQEVKKPSEIQNYNDALNSLSQQNDDTLFQKRAGSSMIPNLMPA  
 PEIGENDSEPPPLPPKESKSIILTPVEMPKLDLKRETHLVRKKIISFF

>E4YHD5\_OIKDI

MKNLLFLFLELILARECLERSDPLGLNYRGSQDRGTGAGLRFPIRRCGAWKPKSGMKHNFCRNPDRSSQGP  
 WCWVDRITDPRDEFKSRASFTFIENGRICMSTFEMCPIEQSRKRRTIDYELDDLYDAEHYNTDDLSD  
 FIEDHYEQLEEQRMNRTKNRTHPESSHFIGSMRVLNGETGALPFFVAIRTSTNIHFCGGALYNEDTIVT  
 AAHCFGDRGTRASRFVMTMGHEKRKWRREARRERFFQEFRVREVILHKGYNTRDFKNDIAIMRLRSPAKFT  
 DYVRPICVLPPGYNLPPSTNAIVGGWGKNEGDEFSQVFKFATAHVFSSAECNRFAGADYTRNDGTQFCIG  
 YEQGGIDTCQGDSSGPAIVKIDGSWTLIGVVSFGDGGCKSNKPGVFTNIAHRSISGFLQNNL

>E4YHE4\_OIKDI

MLLFGDDKNEIDHCDKPCQRADLFMSALELEDIFGGWRPLMAKDDDELINIGTCSGYCQFSSRRLRHSEVP  
 EFLNGCATISFSPLTIFKGD MIRI IDNMI VKNCGCQRVQYCS

>E4YHE5\_OIKDI

MSVVEEDAQFIKDFNEFFDDKFKIDLVIASIKNKISREVDDTNKNVSKERGEISRKEETIEVLKKGVEFL  
 IAERSEKTSIAYTKWSNENIDAVESAITSIKTKIDADFRKIQSIKEKLLSLKETKLLSDVVCNEIIPSC  
 SICFERDYDKMDHSESALTVCGHKFGKSCIEKSFEKKNCPNCDKA FEKANILV TYD

>E4YHE8\_OIKDI

MAIRYPVQDYLSISIVNFYFQKFLSLPQKTSLLPKIFIAIFIILSGLYFMPRDESSKSSNLNETQNDENA  
 YLQPLDVPSAVRSLSKQDMSRFWGTYRSGHYLGLRTRSEKSLLAGLIWLNKSPRNEIHGDILRHKNQD  
 NQLKYGWKEHDGENFVQSVVEEKYKIWTKFLKQVGGHGDWTVKFETEGTGTTFAYFYVTDSDGYLK  
 VPLGHDSADELDFVGETSSLGKFEVRFHLHDAQDRAYSRLQENTAFWYSDYLNKITDLEDDVMRRLAGE  
 YIELNNQKVPHFWFDEPKNDKNYRKNHKNHQVVHSITCEHPCSFVNFNSISGNHERKRPLVGEFFDE  
 ELARHRKNFKRVFGSRIKLQEEFSGEEHLEFAMAAVSNMIGGIGYYHGHSLVQKKEKVTNWDAPLYTA  
 VPSRFFPRGFLWDEGFHQLLSRFNPKISIDSLCHWLDLLNKDGIWIPREQILDDEARQVPPDFIVQGT  
 DRANPPTLLLALDYLVSSEKLEKEQLQALYPRIKAWFSWFNTTQAGPISGTYTWQGRHIGSENLELNPKT  
 LTSGLDDFPRASHPTKDEYHLDLRCWMLAAQVLGKMAIKLQQSNYEYLQLEVELKDNTKLNKLHWDAAE  
 KQFSDFGHSHNVKLVRKQVKDENGPRVIVKRVIEQPRLRLVPHTGYIQLFPFLMKIILESDSEQLGAT  
 LDMIADPEKLWTFGLRSLAKSDPMFNERNTEHPPYWRGNIWININYLAVHALNFYSDEPGPYQTQAQT  
 LATRLRQNLIGNVFRNYKETGFIWENYSES DGKGQGCHPFTGWSALTVLLMEETKF

>E4YHG3\_OIKDI

MDQGHAPTTGHLRVQATLTSNTDHSVKGAKQSANVISPDKEPILIMRLILNTRDRKSAGTARHSKIF

>E4YHH4\_OIKDI

MYKLEKRIKLEQDDNIENANKKIDDLHHTLHTSICHINSLHNMSKLGQLDLEEARTEFKKNFAKEKTVP  
 SMKEDVGEKTRISIEETEAEITAIRNALDVIQNIRALQEERKLLSNEPRNTRRGVLMALQLEAAKCTPLW  
 IGGPNDSKPPALCGALPAAAKHEIVVGSKVAAKVDGAGENEPNWI LAKFVSYDSANMCTVEDIDA VDLTK

AKISLNRKRVLPQPWRANPSEDGDALHSEGSTMALYPQTTCFYKGVVASIPEGPSDNYIVLFEDATYP  
 NGMSPPMQVAQKYILAFDNKPKNPSAATAATSKKGSSKSGSKAKSKKDMATSKGKRKR

>E4YHH5\_OIKDI

MSQSNLTSYFEKLGPLSSRTSPVKKTANENDVESVQPVEALLKKDVENEPFVKTPQPEPPSKKRKRKRN  
 RKKAKQQQESSGLVITIDDSSCSSADSNNLPEKTSKGTTKTDQKYLHGSAKDEQANEPKSTKELEEKE  
 LTAAREKEEHQPKAKRTGSTTKDPSEKEWVIEAILKHRFIDTAKIEYFIKWKDWPSSTNTWEPLEHMVN  
 CQKMIDDYHEKHREDCLEHNRHFPSRPQECGFRGLKPEKILGFCDDFGDFAMLIKWKSTGNTFIDVVS  
 ADEVYEKAPVFLCTYIESVISOQFMPDDEGTSEDEEEQLDSNANQDRDENGECQFDDVCKVDLKDPI  
 LGNVVLRNKNYFTMKEGKSADESQYLVPTKSAYKNFRKLFNLLLFLGGALAEASTCAGSVDRTKVPKSF  
 GADVTESTLRKVWPHIHATHPTVNFWDWYKFFTTYAAAYDHGKAIVGDIYQVWPIDINSYGMTRDIASYN  
 YSLPRALDLSWNEMVFDQLNIPMASLIAANIFYDVEVGFQNHFEQGWNTFSTNYGGTNQTRWEELESSFS  
 FEEYFDHNDVLLVVVDDSSLISDSDFEIKSFITNIQTAVGSSSLDISVHAATGGSFKIFQSGALDLS  
 LAKSDSTDRNFDAIFDAISDDFDSSRSDAAKYVLLIVTGDPTDDVSRIHKKLPGHSQLIIVNIGSQHITL  
 EDDTTKNVYASSAEELNEDDHKVVNLLLEVTQGV IHLWNGATNVRVHANSKRPFICINTESLGEITTSVA  
 AGDSSVEATILASINNYPYALFDLKRPLVTGSSSLIKIGPSFKTTYLSIINENDEILIDFSLNMRPL  
 FGFYSPDIDLSNCNVHEYCSFDGTCDICISTYKRTRDQECTFSQFIKRPDLQFVCDIKDDVVEFYINLTD  
 FIPPVTDPRYGEDNRGFCVNDSTINVLMTKLELAGSSNNTFGNKSCDCSAWKNKPGELQKYTSADCPD  
 IKKELVEDEAGLLKEVYHFGVGYDDAT IETGFGKIMVQPGGRWKLSCDVKRSAAVSMADGEGGTEITYE  
 IENMDFEDVENNQDEVGDFEFFATADLEGNRRIGERPLSNQNVYIQTRISDNNLMKVFTSYCEITVTT  
 NGTVEVFEDILNSGCISAQYEDSFLRPEGFIPSDSGADKFLLRPILPTGFQEASVNVACTVACPSIGPN  
 EPFCEPGPSCGDIYSAQTLRSLKRFSNRPFQENVGMTLEYKQSTVGEDDGRYSDDEESSALSTCLSVTFA  
 LLTIALLG

>E4YHI0\_OIKDI

MDHHEFENFIASRDNDLGGKWNPINSTYKVIIVVSPVEIGRGHQSEAGFSSQVPESPGKSSDEVFKDLIK  
 TSDPVSGKLVDLVSFAFIRDTLQASSLPALVGKLYAEALITPIESLSSAVDHCSTVDDYLKVGYEITC  
 WYVICTAYNPAQNTSVHDLASHFLKRLADPKIEHDGIKRFLRGMILCTKGVLHCIRVIATRKEFTVEELK  
 EVHAVQSLFNASAPLFSGSPTHGQKFRNFVTLNRIRWSSIHPTSHFVVLRTIFCRVQDLENSGLDERL  
 EQLPFDTSQLFLGKLLKANRIAINGQKDLLCALSIDYRFCLEMHARDPTKYDLPSKINLCNANVKM  
 LPTLTEVRRDRDLRRRAAEKQKKTGSPSVASTNAASSSTASGFVWGKIDGKFYFADIISIGENETIAN  
 ALNDFLTDSNGKSEKGGKKRTHSDASLTSLTDNVQPMRRKVTLVTERDPTVLDGTSETNDSIHREI  
 LNWAIRRAAPASEITATSGTFRQPAVPRRVSTSSVPLTVVEENDEVFDAPGHENVADAYTRPRTRSAVR  
 KMTGSNQGAIRAIPANSSSDGSSSAGGNSPGGSEYRPPSGSDNEDRPPQQPDGARFHHGNIPNKL MARN  
 RINQTLGLSTRTRRHAQSDGLGLAQDSFSIIPFFQNDLPQAAAYQPINKRLWKMTDQKPELTLTTLT  
 SAFLVGYTVVAETPTRPTRLAGEQPPELLVERIAAYLKEQIQHIPEE IAGAFNGADYEGSVADEQNFY  
 DNTLSQLINELDARLNVIFMIQLYPKVLVEQLFGTALNANVPVDQSLFREVDQDFATGHSLLVSKASYLF  
 RCDPVLSGNIEAVNNLILHHIPALRCKTDLRHLRCSFASLSCVDTRCKTGMACLFRGSI IAGGVLDPIVT  
 LFAIARRIQNAVTRGTLRGLYEVKHSPNYSFEISAPFEQLPGASLLDSNVLLHPSSRELSSEKTGITPTL  
 LLSIHPCLPSPGNSLRLEFPEEMTHADSPAKYTAQLNLVFFVLVAFGINVAFIPATGSLTIKLDNRNQSER  
 VKQMLHYVNSLLRESQFMAGYEGALKTSQVMPMMPLPADLVPPNGPNRLGRVPTRDDVLQLAEHLDAKL  
 RQPAHNLFGPQSPIMASQELRALLGERNPVVLGVSPhDSSAWLADIAEDLHNDNGRFFAFKDLIFPNGL  
 IYRPDDGCRIPFCKRLECPGEREGWELLQTHLLEYRAEENLSVSMKYCIANATAAFKSENMRVLENALF  
 STLPSDDDPRGAESFVSPVLRYLNNAGWTISRLIHLLSKYAVRVYGLYTKPGRSRAVWTIGQSLPMTWY

IPAHEYTVSLSADLPTKFSKRYLSVRPDDVPVIGERFMREGHRMRVNGRN

>E4YHI4\_OIKDI

MSRTRRGGRGWSSGRSRI RVR IHNDLGPRI FSADPGLPPLDVPEVVAVASTRP IDLS DTPDYDEPLPVL  
 SGELKEDGVRQLRYAPGRQSGSTRVWSPASSLLRGTGSLAGTTTVSYSDTGAPPICNDVYHGSPTATCSL  
 PVLQESSPERSDGFVSKELDPVWAPDPVLAEPGPPGTVKRSTGVGTVYHLADLTKLDESSTSATTTQLKV  
 ALKSKNLACVEPKAGLQSGPPYHYLAEYAGYLGLTDVIPVSELNLGSTDYAGEGLRTCSDSRFCQPRLPG  
 DLPRRVRSPDRFERHWPTNSSDYSVDPPESPLYVHRTSLARFYDHGGDVINLEESVLVLLPTYRREASTL  
 LPDPMEVGVWKS LTRRGVTGKSM LDRRDFGKSASFLGCPAFLDDQTGTEFLRKWVRSDDFCGVDSSDRLR  
 DLLLPLCDLRDSFDPSSGLFRWDRVELHSKNDALHWGYPLYQSGSDNPFQGFADFHVDPVLFNAARFDH  
 VYPKEADRHLIRLLFGLTHYDSSWVYLVTPMDLYRVQMQMAQIRAYSLSEEDGPCPPGRDRLRQIDPGNWH  
 AQITDVDSHGLGIEFAALALTIITCEVALHPTELTEDGQPAFFFDHSARGHDGLVLSGGEGGKKKCFQF  
 LEALICGVRGRERSDGDQYIGHRRSATSDDVLQPQEKFYDAVTGRRYPPVTRYDRQRP HHQAEAYYQTR  
 FSRKFADGKFEVGHVGLPDVHFEQLDGT DCTARTLMSIPTHLAIAPFEALCAGLYAFINHAFSRGPASR  
 TLQTSRFRSPDVLPTSWEKCHSSGRHVGYGGTVHDVVSTFEAVARDVETGTSRSRRLYRAYQVSVQSA  
 HFAAQRAFRCGNTRGVDRRGSQ L FHD CI IDR DGEPLGLPLEQIVARRCAFTAPAPVEDEVAASDCESAPS  
 SPVAKSARLTEDHEA

>E4YHI7\_OIKDI

MNAESDKLIEMIPISSNNGLVVEELAFHVHPLMNVASEIVDIAENITLNFITFTAQALAAAYTDLLRKA  
 QFAKSWIKSI IHKHSSENMFREFLMHFRSNASNTFDESIVHDLFVGCAGHQFDFLIVNLSKQLTDVVSIR  
 KIHVSFQEI VKKRSVKMSDI ISDIVHDGKNDQQSRKGSNHC IKIALAF

>E4YHI8\_OIKDI

VTDKRANPGGAAPLLIGLAACTIGLSYGANGGAINPARDLGPRLFSLIMFGSEALHGS AHFFWIPLVA  
 PLVGGVIGALCYL FVISAHWP EETKIEEYQKVS DGVSI PPF SNNYFTIQGEI INDENIN VEMIRTTSE  
 IQRQEFY

>E4YHJ2\_OIKDI

MVLGTGPLQLMECAGQKANLVEEILKKTTRRGKPMVTANEFDPAGYTVFGRVARESPAPLVRATLDTLK  
 KFGGEINAKCHSGYTPIQEAILNRKDPAACVSAFKGFEI

>E4YHJ3\_OIKDI

MKLFSVFVIAAVSAQGF DNKQANLARNLDL TESDEDREKRFKQECKDSIGNKQDTPRWNEKMEACRAKDD  
 AKHAKRVAKAEAAEDRAQMAEIKTKKAEKAPIKAERNLCKAACKQIANQITKSNCLSWWKYSSRVEIQK  
 ILDDINDIRNPAERNSVEHCYTKSGLSGSESTCKDFAVDFCDGLNLAKPSPILRDCKSFCVNQCMEEGEN  
 CDWTPADYVPDL

>E4YHJ4\_OIKDI

MEEPDTGQNHVQQRVKTGSARLREIRENLVNSKTKPTITSTADVFEQMTTTSQEIGIVASQVPEINEEK  
 ILLEANWTRINTEPPEFSTVRNLKALGAI GGIAILLGCVC SLLYISRQKRRQQARAQKRSPANNKFPG  
 SNQPPNALNPAYPPHYFNPSHLYPQTQAQGPLGAPHGIPWSQVPPQLNGGSAFAGMQVQYDLAQYPEA  
 YLEHFRQQGLYDPPYAVEYYQQFYQQHQQQAYPESQAEMSEIAFDPVLN YVETIGEGLKTPKRRPKQRKD  
 GSSTPHPIITRRASFKSVRSEVSAWTEDEGELGRKSPCERGERRGSEELEGERTPKGDSAYSGRSIQS

PHSIELTGVSDDEKVPDGHVVRFSKVTTAETNEHGTSGSRELAVE

>E4YHJ5\_OIKDI

MGLVLGLLVLVAFYDLFKYSKSGAKMCKEFSIFSGSWRFWRRSKSGRGRISVDEKTFSAKISSIETA

>E4YHJ7\_OIKDI

MSNLLHEHVLELYPKLDHDIADYLGGLLDDVDCFDSDADDVSGGIGPFLIDCAQAKQDDVDTLAEKLGWGLMD  
 KKSDEPIKLVKAVVFGDNAVDTSEFDSLVTDIELRGNNAKESAKADKRARAKLAKRQAEEEEAEKNREK  
 DELLKEQAVASQAKTKSAISMSGDIL IENFDLTFGAQQLIQNADLNLAAGKRYGCVGRNGAGKSTLLRAL  
 SSRGLSLPTNISVLHVEQEVIGDDTTALDSVLGVL TERTSLLKEAEDLGASGADNDRLLVVHERLEEIDA  
 DSKPSEAAGILDGLGFTTKMQKMTTKEFSGGWRMLALAQALLMEPDLLEDEPTNMLDMRAVLWLESRL  
 QNWPNTLLTVSHDRSYLNSVCTDI IHLSSRTLYYYKGDYDTFEKTRGERHKQQLRDYEAQKSYRDHIQIF  
 IDRFYRANRAAQVQSKIKILEKLPVLYPEPPEVVKFGFNAPAEERINGNLLQMDNVEFRYSSTNRQIF  
 TGIDLSCDSKSRIAVGENGAGKSTLLKLLGRLEPTKGYVTHNRNCR IAYFAQHHIEDFDLSLNP IETL  
 RDFKPGKTAEEYRRLGGFGCTGDVATRKMNVLSSGGQKSRVAFKLGFAHPHLLVLDEPTNHLDVETVAA  
 LAEALKQFKGGVILVSHDERLISVACNEVWNCADGTVKRIEGGLEAYRSALLADFNKGGISKHKE

>E4YHK3\_OIKDI

MSASTYGECVQDGFQITCLTFYNFTVADYI IFSFMLCLSAGVGVFFAYRARNSETVEDYLLAGRTMHFFP  
 TSLIMCTALSAITILGTPSEFYLYGGMYI WAVACFAINLSLAEIFLPIFYHLKIRSTYEYLELRFHSI  
 TRKVTMAMFLLATIVSTGVAIYAPATAISAVT SIDLNLA ILSGLVCFYTTLGGMKAVVWTDVVQSVWM  
 ISGLLAITIYSAVNIYDEIWQKAKDSGRTEFFVT SWNPTVRNTIQAF LIGKTFGLDGYSFCVSNFVQR  
 FLACRSLAHAKGSAYMSIVWFATIIITFCLTSGFALIIYYELCDPAAAGFLETTDQLMPWLT TYLFQENAG  
 VSAIYVSGAFAASLSTVSSALSSMANALVSDFLYHWTNKLSEKKQLI ICKSLVFLGGCCIGFAYMAASL  
 RGGILEAALAI PAIVGGPTWGVFMLAVFFPFVEF IGVSVMFTGVA ACTWMI GRNIAPIPT EIVELAGK  
 LEVNTDHC MYENGTMPFGNDVQPEYIENSPLLSFYNISVHYIGTLGFSTTVVFTLLTSTIVHLFVRKGY  
 NAKQRDPRLHCHHFSNLWRFITRNKVRSEDEFWQIPGIKEEKSALEKSSNTDRSSVMSKTSNNKVSPEE  
 VQTEF

>E4YHK8\_OIKDI

MKAALLRSSRTLNRKAVLFLDFSQFEKETNDNHSKNQDNQFSTAVSMFTVGGMIGSFSTTFMVTKFGRKG  
 AQFVNCFA SFIGAAFVYASFYLSSHYCLLLARLAVGFFAGLSTGICPMYVIEISTADFRGKAGVLPQLFI  
 TIGILTAQILSFP SILGKASLWGWFMALGSI PCI IWILYSPKMVESPRYTLIEKNNSEQAQEDLRKLRGV  
 EDVSAELAELEDEAAKLKAEQSEDDGMTVMELFKDPSLRWQLLIVCVAQMGQQLSGINAIFFYTNDIFK  
 AAGFSTETSTMISALVGL ENVAMTFVSLAVIEKFGRTGLHVGGNILMVIFCAGMFLCLKYLTAASFVPYL  
 SIVCILGYIVGFAVGPVPWIWNSEYFPQRARGPAGSVSCALNWTAAFLVGKFFPIAQSAIGEVVFFIF  
 CAVSAFLAVFLWKFAPETKGSFAEINAEFAKMNGMEVQETEMLSDEK

>E4YHK9\_OIKDI

MKLSNLILSTV TATSSINELLVCSVWPGETVEQAQIKRSECELRAIFSSSNGDVRFISRNTSHGLCIDL  
 DCVKQARENSRVENGAVDVVKTAT IYEKSTEHKLLTPKRAMIPTIPLASVSGTYNENMLQDKSEEINDND  
 IKINDSKAEIKSFANSWNKIFSKAKEKAELPEDEFETQYSSSCSITDPESENTCCSAYSISPCCDYDQKI  
 RMNQGVSRFPFLRRPTGRIVGGVPAKELKTSVAFIAKISHDHNFCGGVL IHDRWVVTAACHMLEYCGTSF  
 PGDLVVKFGKTKKINWELEDGEQTHYVESIHCHQENCKAKGNPRLNDIALIRLAKPVQMSKTVDIASIEPE

PFAMPIMSQDCITLWGDTKNTGHADLLKQVSIPLVSNAQCNDYNWRGCTIRSCMMCAGAKGRAPCAGDS  
GGPLFCPWHGDSYHLHG IYSFGRGTEVTKPAVFTRVSNYREWIESTLSQFGDFV

>E4YHLO\_OIKDI

MRFSTFVLFAAQLANAMSDEELLRMFSRSSRNHRHSGCYKTAKLSKTRLLSDEIEIFRRNKSIGLLNCF  
QINDHQKLIRRGRYFFENILEKLNTRIRKYKR

>E4YHL1\_OIKDI

MRRSMDSPFKDRKAQLSI IREYKLSYDKMKREFPEDEEV IETKEESLNPVSCLRTTCGVFLLASGMIGVF  
YVINLPEAGKSLI

>E4YHM0\_OIKDI

MVLMASILLPLFASAYVPSFDGDEQILRRSKRNSSFYRERTCLSGTEDPRILTPSAACSSALTPPTPA  
ARYTTLNGRPLRTPAMDMMIFDKLTLFRFLSRETTNFNAANFEDKNLCIFLCKR

>E4YHM6\_OIKDI

MKLFALNLSFCAAETLLVPVTPPLCPDLKNEICSTECSDGRDQCYNECAGDYSCVNRCNSTWLNCLCS  
CPCSSGCPDGCIGCPHPVCEATEQYLFMINYNWASENKALHLRLSDNSFIESNFNYHYEYMDVDDACVSY  
IKGQHFFIGGYNPRAI IKVTDCEFKLQSQELTIPHIGGMWGCETYNDVAQLCFYDGGVGARDCQTFDS  
ESEIGTFSESTHPHDWSAMAVYDDKMWVVGCDPDDYSNCHNHVEYTTQGEYSWQMPAHPSSSEIYAGVV  
LGDASGVYTFGGRGNNARSVYMRNGSWSFLGQMTATAYSYYFTSGKIVGDYAYVGENSFEKVSCLKDG  
VLPLSTNIGPETDDLRLYYAAMILTDQIICIN

>E4YHM8\_OIKDI

MRNGASKRNASRITASKTRNHECAGDQRGGRRR

>E4YHN0\_OIKDI

MSLARQNARKFLSLEQVCLVEEIFDDRQLRTHIFELLFDYSENAGTPEYQNWRLLLDEIDNEIYEPHYR  
IFKLILEICNVNHLRAIAIDPRVPHNNFAVFTNAFKTGTESLGLTLRNYVDPNGSPELYVASVTSGQI  
SEQAGLKPGDRIHAVGKAIKKNLQDFKTAIMSAKTNLREFTITVEKIGFIPSTIGSAQHKKIVWNRVPDY  
KFNQEEIPIRMNLSFNLSYCSPGVFMQASSKRDQNFRTTARIGDEVTEINGIRTAEMNRDEFVLQAQG  
ITEVFYRESNSEELARLISRLNHAGINWNQTELDRLNERHQILFLREATEDKNKHLQRSTSRFTEMNSYV  
KPSKYSDNTSEDGIEENS DKTRNGFLGVPDVMMDKSESEIDKVVEDLEGLAEKELSRESVRSVNYHSGS  
SDFVTAVALASRNSIDESGSSSGVDEPHATSNVQSEPEPEESESSSERETILLPDPESDEEPVQPP  
DEVKKELIPKISELERKFLKMLQENSKMASTIRISIPSSMRPRADMVFLKIDFDENTVLVFCRNKYSQI  
AVKETSFQEIRPGDEIVKIRTLKVKEMNSSLSAVEEIFNNWKRSHQKFLKISVSRRRGAVAGS

>E4YHN7\_OIKDI

FGNIGTHQDLPLLDWLTNYTFPIESKFSDFKSEKMNAAVVRSTLSRGTTCYFGTIYKDDAVGIGSIK  
TNFQLFSKINPKQALTKAKEGFYRARSVLREKGGHQINNLRQGGKYIAAKKQNIERHYEEKIMAAEGDR  
IFVGKIVVGTDPNEELTKNDWAIIVVDSHGIIKASGSSEHILSRFDGEIVKLGYPYILMPGFIDAHLHAPQ  
FGNIGTHQDLPLLDWLTNYTFPIESKFSDFKSEKMNAAVVRSTLSRGTTCYFGTIYKDDAVALATQC  
AEQGGRAYVGVNMDINPLATYYVNEFIIFKLYFFPTREIRGLGNSLVEPIITPRFAPSCSVSLMQSLG  
KMAKEQDMAIQTHISENEGEIQLMSAFPNDGYLDVYEKNGLVSDRCLLAHSIYLTESEKKKMAEKGASIV



HCPDSNFALMSGVLDHQSTATEANINVALGTDVAGGASASMVDAMRYAELASKINTINQKQTTSYLNFKKP  
FIYGTLNKAKALKIDDKTGSLEVGKEFDAVIADVASLEPVFLDNDSPELLERFVHCSDPRSITNVFLR  
GKQVFSS

>E4YHN8\_OIKDI

MKLFALSAFSAAGVAHNSWIACTDYLEKNGRYYDHDLCRAWPRDAHNYAAIGGTFGGDRGFDHKPNSGSSP  
CKSSRNNNNYQGEHHSVYYYQGGQVLAHPMKNHGTGPCTNPYIPDFGNWIYATPQTEPGQADQVLSVFK  
QNEVADLGRSPTGNGVDTEAYPKIGYANAPAFCEDDTKSLGTYSFNIPVDYPAGSYTFSWWAFNGPTDY  
YSTCFEVEIVNKAARDDIVLGRGQSITTAICDATGTSTGEAGSTVGCDAETTQPPTTTQGTGTETGGN  
GGHSGAGTGDAEIRTNQMTGNIILQPAASGITRREIHVVFFGECSDDAVPNFWYADMTGTTSGDGSLLRK  
RRSDGTGLNEQHFLVQTAAEDIQRAKIGFHWGFSNDGCELLEMPVHVHTDS

>E4YHN9\_OIKDI

MKITQKFYPLHAKNAWSEKITDISQTVSLIQNFLSENDFFSDFRYAREDERNHGGTLKMASDSEGAFC  
VIWRRSWIRLSVGIQSRSSGYQIRVFTIALCYIVATMASFQAFTMIAPGAALGARCSSRTFFAILLSF  
FCLKEKILKFEILSVLFCVGLLFYAGDSIMRSMVNNGTALPQNLVGLGFLCAIAGLSRSVGMTMYR  
KIKVEIDPVTIVLVHSLMTVIAVIPVLEFESFNLPKRTTGWVYLVACCSATIATFSSNWAIQYINPGL  
ASVAQNTDIIVSVTLEHLVIKTLPSGLEIAAVIFVLLGTSSLPLFRYWESLKREQEDQYDDAKALLK

>E4YHP1\_OIKDI

MSKRRIQNLDDSSDGEDNPKVTKLVTSESHTSDSDSEWNTNGKNRIKKEKRSKPKIEDSDSDSEASDA  
FDDGWGDDLIGDEKDREEIEAMTEMEREQVLFARGERRDAERKRWEIEKRIKQRNREKKKGGDEDSQP  
TNSRDKSSSPEPSDPALARARNQKREKSDALGRLKEQREKQEKRAKEGSSKSGPLNVGDYFSSDEEDE  
EGNNLASSDSDSDRRRSDDDKEDEELARKRKKVECKEELKPAKMSRFRLCQWMHMPWFRNTIVGTYV  
RVSIGLDESGARYRIAEIKDTGESSKTYKLDPGDPKATKIHTNKTLRLRIGNSDRAFRMCFISNSDSD  
TEFDFWKKHGLKSGLPVGDIEKKQKELERMKKHVITDREVETMVKEKAKHRTNPINFALQKTTLLKMRD  
AAETAGNIEEVASIQSKLEEIEKRANKLSRDRQAGIAGITEINERSRRKIRGMESVCEAEWAKFRNNDKV  
DPFTRRTTAPILGN

>E4YHP4\_OIKDI

MRSQILINILKQSVKTSQKFNDFNFRSYFVRKYSNELAAVESNEGMTVTQELLEQAQRDLALVERQTVVQG  
LYNIEPTVVEMQK

>E4YHQ5\_OIKDI

MKFIIPRKYFHENVRVEVIETLPDEMEDNINYHGTHLWASAVVLSAVLQKMRDLCHDKIVLELGGVGLPG  
LVAAQEAKEVIFTDGFDSGLLSASEALKINQLEAKTEVRKLRKWDKEALKEFKSIDVVLAADCLYPDVSS  
WNDFQTVVLLKKTSSFCLLGKNMLF

>E4YHQ6\_OIKDI

LIYQGYLTQGPKNMGIENGNLKRERGMEDFGASGAPQLYTQDGPDAKRPMDVFGGENLTTEEFVVPD  
AMVGLIIGRGGDQITKIADSGCRVAVVPQSTGGTSRPTLTGNPEQIEAAKMLADIITRGSVKEGDFV  
NGHPAPSANDLMNQVAATASLDGNCMEEIIPHDKCGIVIGKAGNLRNLSRQFGCSVNLSTVNTGDP  
KPLRIAGPPDKVNLVVAEVHKMMAAKENITHTKVPDGDQVTFMIPKVSQVIGKAGETINRIQEQTT  
RIQFVPPDPKILERGCYIIGPQEGCLVAQKEVLEVVRKKMEEVEGSKQMPKLVFDGKRYVKQDGMNASH

HNGGGEQQVDYPVPASRAGVVIGKGGETINGIKEKTGAFVQINKNPPAEHPDWKYFTIRGNSQQIAHAQK  
 LIQEKVGGPAPPAAIANSSNGNGSYTGGNSYGSNNSGGGGQQDYSAAWAQYYASISQQQAASAPAAAP  
 AATGQPDYSKAWEEYFKKTGQTPQSYQASLAAQQPAAAPAPTAAAPAAGGQDYSAQWAEYYRKLAEYQK  
 AQGN

>E4YHR1\_OIKDI

MMFFLFLFLPIRGNSQICESGRGKYGEPVTFCEGLSKPPDFGPLRKTINLVIRNSSFTDLYGRLIRRLPF  
 LRSITFENIPLSKIHKRAFISQPEKINFLHNDQSIPIHAFEARLQNILSGQKISKITNRTGSEIAKKS  
 PRLNKINLRENEISIVEPNAFVNLQNLIELDLGANKMKLNFHPGKVTDLRLDNEISHISEIFTKNSQK  
 IKRLILRSNNLLSIPVFNFERIEFLDMKWNWIWNTPFDEQNFTQFANTDYENAI FEVGGARIYCNCDETW  
 QEYVSKIAVVEIECRPEESRGWKKQVQISSFFKENCAESSADAPETTKFPEKSSSIDSTLEWSDSVTAS  
 SVENTTFPESTSSPKMETTDLFLNFTMPDPTFAPTQTTVFSGDIPVVLDAPLWRSETDDIEETDNFFSGD  
 DSSENIEDSTEASRNDVWFWMIDDLQTLWDSEILEPIEVHLENDKSEGPHQTTKAVMESTKSYEATTK  
 IEAQTFQTFIDSEVLTKRNSQTKNETIKPLMTPSNPALTTFTTSLGTTSDVKTASDLAPSRSTSTITSK  
 MKTTFKTNSTTTTTTTTTTKMTTTTTTTTTTSTRLSAKRRRQLARRENQLKGRVNMKNKYKKQQQN  
 KIKAVKDSAKWKQNVKGLTILQRSNDLANMAERKLIYEDVKAKEFRALIEKLETTTTSTTTTTTTTT  
 TTTTTSTTTATTTSTIITTTKNFLDMKHLIETLNRIALDRLCLFFFAEVKNWFSNGGGRMTKSTFFKF  
 LRRCEVYEYKSKIFEFFGGNLVLTDETTTEGLTLPNLTPATRRHLFTLKPRLFTPRTRSPPTTKSSV  
 KTSQSTKINDELTTIEIATTTQELRLPTKPTNPFVGTNKPAIVQAT IETKASTDEIVTLDVSPEESTI  
 KATTDWKFNGSPASTTKRPFLNNSLPEEKRIIIILTISFVAIMLFGSIGVTMIRNMLCLESPAARQARE  
 IREMELNEAAQANLFARRRRRGRSDAPPAYNDLFPADR

>E4YHR6\_OIKDI

MEYSTEIHSEDFCTITADGEYFVQFCDDPPVPSFVNSVDAIGQYDYSITFVIDTSGSMFGEKLGASVDG  
 LLAALAGLSPADNFNIVSSSRKEEIFSQEALPATAHSIARAKEWMLTRHGGVSSIMTGVSQSAIWHITAS  
 DDKKRIPLIVILSDSVSDATEENFQIALNSISNSAAERISISALAVGYTDTSSWQFLQRLSTRNRGLAFR  
 LFDLTKFVEI IPEKVDG IKKFSRSLRGLTDVHFSFNSESVADLTDTSFSHFTAGEDLVVLGKFGKAPAF  
 LNFTIEYRDVEDNLISFSKSVAIKKFKDKTGERAETIAKFSAEQSDYNPIRQQWAVTAVHQLLKRRQAATS  
 QSDYDELTRQAAKLSRRFKIVSPVVSFLVRRPKSSANLIDPANENGLREKRSSEIAESHEIHYQYRKLWW  
 RSDEKDELEKTAEESFENLQWAAALTYPLMFSRKLENSDEKVLALPGGVVNGRVKLAENEQFSIIGDI  
 RKFKLISVTIRINEDTIKVTNTTIYVDGAPSSSHPFRTENFIHFSIPEAKSSFKVHRLGRRLDLTAEI  
 DLEEITGFLPSLLEVESLMLEEITEKHKTAMLVWHGKHLAHREENCWRLNAGETDVLFA

>E4YHR7\_OIKDI

MENFQEKIRVFFSERDRKTLLEYVGVGFGVVVCKVTHFLLKNTLLHPIPTFEFPLSRDDNFKAIKKGLD  
 EGKLPKVFRPKIFPGSTFSDILILTDFEIMKEAFSKRAISNRQFSDNVRADIENMQRRNLNYDEIPKSILD  
 ENDPLFKNGAGNVAGSAT

>E4YHR8\_OIKDI

MTFLELAYLECFSSKNPSASAFFSHRSAISSAVSPSLVSTRKSKMRFSGDGPYDEFHKKTRVQWHDTKR  
 LAGKNKIDEIIQQTAEKTTFYLEKLGSSPEGMDPRKVFMNASINVTSGFAFEKNYDFEDEFQKLAEYIN  
 EFRGLTHKSLQQMTWNILPRWICESDFYAKIWKYTPMKHFLDAVPPFKFIYTMIKEQRKSLDHANPRN  
 YLETLIDAESDPKWGYFTVVATIVGVFLGASDTLANTMTWLALVLADHPEVQEKMNNEIKAAREIDADL  
 KKENCFPTRSVLLESRRLNSVSDTLPHIVSEDITVKGFHIPRNSQIFGSLAAVMRDPKNFDNPSKFIIPDR

FIKDGRFENDPKVCGFSVGLRNCIGKSLAIEEYFATAMVENFRIKRVAGNMDLAKHAFRLRPIDDIRV  
QFLRR

>E4YHS5\_OIKDI

MKLLCSFILAASSRDTRRDEFTVDKEYVDAVCAEKGEESYAYSDSVCDHYIHCEKPGSQAVPHVMPCSPG  
TVVNSVEGFCDFPNTPPPCTLESGETHQDCEQGDGVYAHNNCEEFICYMGQKYFGKCPAGFGFDQ  
VGKMCSDDLFVTSFYCNPTKKVYGNPVTTQAMAFCEKEDGYVNPVCGGRFICWSQIGSEFTCESAQQ  
NLNETLVWNSSEQTCDHPATLADQTRSCLSQADSIELEELLVKGSIN

>E4YHS7\_OIKDI

MKLLGFFFGALSAQLVDVFFDDQGRQSDDGDSWRSLDVDEKPGMCGGKIPPVKNKWKQCRNLNDDGN  
KKGKGRKCKLQCDKGFQQFSNKQNKPSDGVVCKSSKGWKRKPGKISCQKK

>E4YHS9\_OIKDI

MVGAI IKKLGKNTAELARPVPIGRSSPLWPHLQIAADGGDTCEVRVLPSPIEQVVGELNVDRFPCDFTQD  
EVFYQHYGRAEPRSDRISLQVHYETRTTKKILPIQIEIEVLMAPHNLPNERVFIDNQDLLGEVYPIFEGS  
PPFDRRFLSDNPKIGMWPKYGKLVFAPVRSCTDDFVNSGIFYRHSVGTGTPDKDHQPLLIEIEDKSGFVR  
EREFWDLQINIRAAPKNEPPNVDPAELKLYVDQLILTAITRDVLFGKDYETDSRLLVVEFDQPKSGFF  
VSTDDRTRPILSFYQSELLDNKIAFQPPQAGSDFDRLLSVNFRIHDEDDGGTSPWVPFYIKIQAMETSTPF  
AMENGLILYEGSRRCIGPDELKLSDKDTPIGNLNRVIDGNRHHGQIYVGPMAIDMFSGTDIESCSVVYE  
HDDSDTFVDNIIMEISDGEASIEILFPIWIVPIDDQPPQIVKNLGAIEYKNSNVTIDLEDVDIDSHGPTL  
YTLQNPLSKGELFVLNDEGQWTVTRTFTSEVQVRKQVEYMHNAGVNQLNVEIEELELTASDTRGNTGLSF  
NYTIFIHPRDDPPRCNFYPCITLGMRVNEYETAPLRKSNFNFVDNVSPEEVVIDIRTPPHDVSTGQPMG  
RLLGADTKLPLTQFTQQMVNHLKVVEAPNSDLGLVRRVVEFSFHVSDAMQNTLYDQFTIELMPMDNAE  
PIVTNMGLQVMQGEAVTITQDKLDVTDMDTSDEMLAFMLLEEPAHGELRIADMKIEVGYEFTKLDIVAGD  
VSYANNGDDNSDIRLEVTDGMHSFPVNVVVIPRPVPEPTQRNPSETTLVVPERSQTELTAKYFL  
GPPEAADKDLSTIVKQPEKGQLLKDGLALPAMTQPVTADMANGRVVYQHNNQIEIGPEEVQDLFILQAQ  
DIHGRAESMEIITHVRIIPVDNQFPLVTVLQSITVDEGSKTSFNPSHLEINDADTTPDDIICRIDPQPEF  
GFLENVSPLPGSEKSRAGEAITDFRAADLPNEFINVVS IHKGYEPTADEFWIRCRDKQNNESI QKKITV  
IINPVNDEEPIEYSRWRVREGDILNLDESILNCRDLIPFDELTFIVTSPPKFGKIIYLGMTLESTES  
IDSFTCEQLRAHEIAYEHDDSENFEDSIKMLTDGKHVTEETIPIDIIPVDDETPRVEINRGLQMEHEQR  
NARIGADVLRVTDLSDVDEDLMIITHPPRLGTLRMDDGSPDGRYLSEGDVFMERQLWENRVIYKRDSLQ  
SIDEQRDYFVFEVNDGLNRLIDRKFFIQIESGDKLYPMVFNEGLTLPEDGRRTITTALLQASDLNSNDLE  
LTFKVNKMPIKGHLESTSPGKRTTFTMRELVGSKIRYVHTADDEIRMDAFEFVSDGNTVYRTFRVN  
ILPIDNKLPVVKVEGIRMNEGSEKLISPFEVSIEDQDQVVRVTIIGDPIHGSLNYDGSFVASEFTLA  
DLKNNKITYKHGSESTKDQFRFIVTDGTHDEFYLFPELKDTHSGAVTFPIDIVPVDDEIPKLVTKPGS  
YVQQNADGKTFTISKKHLRATDRDSFNPDLYKVKELPKHGRILKALPAQMPQEVDYFTQKDIDDKAIR  
YSLNDDVSETEDEFIFDLVDQGGNKREDLKFICRWSFVSLAKEMITVDEADKELIVTVKRRGYLGETAFV  
SVNTNDILAESLDFKNVAISSNQVQLNPGQTDVWVKIRILDDDIYEEAENFEVQLSDPIMTILEDPSRA  
TVEIIDPDESTVFLSEPQIETVENVGLRVPIQRVGDVSMELAVICSTVSGSAGGTGPIPLESFFDFIS  
RPESHQSVIRFGPGQKEAFCEVTIIDDSLYEPEEEFTVLSQPTGGRIDEEMDETKVVILKDPADIPICN  
FNVKNIDVEENVGQVEFEVLRGSDLTGESSVIVRSNDIIADLKYHAAEAGSDYVAISKVVTFEPEAVSA  
TVTVTILDDLGNPVMEGLEQFELYLSMPEDCVIGEPKEIKITIDDREDDKPSVEFQKAEFEVSESEVHAT  
ALIRQGLNQETTVCYTRQIGAEVAKDYIERPNTDVSIVRFVPGQTVAKCDVELVNDQSFENTDFRL

VLGTPLSPVGAKLGEQFDTLVNIKDDGDQPTVGFEEKPLYEVVEPAEGNVQLRRCVVRTGDLAGELELRV  
 HTKDNADSGLDYIPLSKMIKIERDDDKCCFEVDILHDKKKEIRESFTVWIKDPIPENGVDPIVQPRTI  
 VYIKQRDILADVTFPTSPKVISLADYDKLKNAAATVPPPKSGYPVICVTPCDPKSDVYDEVLSLCEDEQI  
 ANEMTEYRWQVSAPSDANGATHSLQDVSATTFMTVNQITLDSIYFGVGSRIQCHARAVKSNGEPPGRESA  
 SEIVTISDEGICPPRQEGVMGADPFSAKIRYIDGDDDKHPNTIKVSVLPHTDGI IPLISTKQLTNFEFT  
 MSEDSTRSSQHSCSNLLLPREVRTNFGFLT NATSNPKIYSDNDLMPYQFDRNLRSERTLQFYKNLNLLEAC  
 IWEFESWYDMSSELQQACGGEITTDGQVLNLIHSYVTLVPLVYSYISHSPTRIPWRHFLETNLRLTFVY  
 DTAKMWTGIGTPESSLPPTSMKI QPDGRLVVRFKTVAQFTGMFVLEHPGSAESTVSSVQHPHEL  
 TFTLNLIRSDKSFSTPEQQWFSVSNYAITDYSGDYKISLIPCTVSHDQTYSDPPKCNPRDAVEFALPLRA  
 QQVSDPVAEQFSLNTTFSLLSKKDLWTADSAIQVTESSDVAFPEGAQIYGRVQVDPVQSLGAGFTVNI EK  
 VFLCSGSEGYIPKYNPGNSEYGLADSHLMYRFKVI VSYRISLLGLQIFKDKEQPDTEDDSLNSVPFNA  
 VLA VDDPSATLSEQPGADGFRMDSTPLFQVNVGAEWYLHTIYTVRSSTKRVRHSIVRRAAAEDIGVGF  
 DRGTNMMPIRLMSDEAFEEMEAEKAEFNWMIILAVAGVLFIAAFVLVVFRRRNDGNYPTSGYAQARSNSD  
 AFKPIVRPNQGS DSSHSSIPSGTEV

>E4YHT0\_OIKDI

MLRRVRSRLKNYQTRKNSVDVINAIEFAHATGKCSYGI RNLHDDVFLDKRELDPVALYKSLEIIFRVAS  
 FDQQIDFKRFATTARKHVETSELSLETRTACL SYLNSSKKRINAHQSDLIRSHLFDNHTSIKVC SRMLEI  
 LIVDLLKDNVAQNANIVDKLLQKLYSERGPEAIRRSLARLLVIQKTNPQFSHLFEFANSKSSEIIESDIP  
 WVPLINTQPEDIRKLF IHKAGGNVA AFYDPMKTI LASDFDKEKHNLA KALIDVIVDKSLYSFNQKAYEL  
 NKFHTDRVLGTFRHQIKRIYEDPEFLHLMIPYLSKVNIRWIKAYTCLLRNMRKNGFDELERFILEQQKE  
 VKFGRIPSWELDMAINGVRTYDLNYYKPKELSWLDEILEIEGANEKIANQLLSDIPHATLSSNITELKV  
 LEKLYFFAKERPMDKKFMKVTKSISTRANHAVPLCLLASGTSGLAKSGIDFPSTSKMKFSPDFKKKLQ  
 QVSHPVRI RSFTLNFIDYSEVLSENELEELITTLPEILAESVRREMSAADSTLLFDVSGLHEFENLMNAI  
 LARSSRTRDSDIRIVMEHLIKTSNHKVGVRLEALQTDARLLAQFDYFDNVHLEFAHFLYISDSYLEIVG  
 KQWEKTLFNEAKKYDISTRANHAVPLCLLASGTSGLAKSGIDFPSTSKMKFSPDFKKKLQVSHPVRI R  
 SFTLNFVDYSEVLSENELEELITTLPEILAESVRREMSAADSTLLFDVSGLHEFENLMNAI LARSARTRD  
 SDIRMMEHLIKTSNHEVGVRLEALQTDARLLTQFDYFDNVHLEFAHFLYISDSYLEIVGKQWEKILFN  
 EAKKYDIRFMMISPILEKRFDSWGNFFYKSVGRSFSIFSWNIKNNPDDFFILRSMCDYQSLYKLC EKR  
 NEWGSFMDKAANHCDYEFVRSFIEFDNLEGLKHVLYSFKWKDFSLHPRLEYRMIHVREIVRSKRNVF  
 IEMLVEYFDEVVPKYGCKELQSLHPVLI ELDLVHLYDKIEPHLLAHWEYKRKSLEGIRKIENSENWL

>E4YHT6\_OIKDI

MIKLLRMQVCKDAPAVKLLKLDTKEGVASVLAKSVTTRKNKKLMVNFMKKQSPLSPEKLEDTFAETDYI  
 IDEKRLRRRVPYFYFTHHKFALKRWLGMSVFDMMIKEFSLHISTPEKLEQTAERGYMLFNMEI IHASELK  
 NRI IKDGMISTKDRHEPPVRIPLPEVIADTDEFYVVKPSSLP IHPVAQYRHNSLIFLISREYKVNYH  
 VIHRLDRLTSGLVIFAKTKEVAKRVSKEISDRVVQKQYLLRVVGKFPDKAVCDKSGTKGIYRVAKADDD  
 EKKVKTALTEFELVEYFKEADQSLVRAIPKTGRTHQIRVHTQYLGCPVNDPVYNDPLFGKERFVERQQR  
 EDITEEMAVNGLTKTKNWGPKGYKISEDNRDLDMDFEKDPLCDKCLNPPADPDQHDLILYLHAKYSGAN  
 WSFETPTPFWAESDFKTPEYKLYLL

>E4YHT9\_OIKDI

MTPKGANSQKKWKLKMEELRMHQLKMKEREIIAQRNEEKEAERIRIEEKKRQQEENEWKQAKSQGQVVT  
 DAKKIKKLEAKEIRQKKRAARRKSKMKGPSKLL

>E4YHU7\_OIKDI

MLWAVSTLCSLTFQAQSDVDKGCENLARDIGLLLSAGISDYSPKLESVFRRTDESWRPDRVQNRVNLPPQS  
 SYEVSEIVDYRTSISDLLEDSSEKIRKLLSGADQGVSELQETLLDLYKKKVRVTYNETEVLTKDKYYFN  
 AGYTNTEVENLEEDDPYSSIRQRIESLRLNKCFCGQGINVSFEQSTVHVFPNVYLSDDVLTASYSTGL  
 DKTFENNAKNSKVLWSQYFASSKGLSRFYPGLKWKLEDEIKRPIDYDARFESWYASSINYPKEIIMVDS  
 SGSMKGYRVLAILTIRTIIDSLSDQDFNVHIFESTPSYLGCFERTLVVRATDFNKQQLKVLQSMKAS  
 NVADFNKAINETYKVFKEFSQFSLTQNYPPAARGIMMLSDGALEDYAEAFNNASIALNDSNSVEKTRT  
 FPAGAGADIRVFTYLIGKDLKHQMLKNIACARRGYTHIASPADVKNNVMEYFHTMNRPLVNQDVYGVK  
 PQWSPMYSSSLIGGLKVHGLVVSATQAVYAKDVTVNSGELLGVVGTDPVPLVFLEQYLKPYILGPHGYAF  
 ITNANGQLLSHPDLQIREENGSMKTTYRSMITIMELYRETPSRKKDINDAIRLAANGTSKVYKRGFEAR  
 RIDCGSAKISCRKLAVDTENVLTDYSFIGLNENFVLGIAQPRLMKNGLQFAQNTKLLLPKNMIRGS  
 VNLIQECSKPLGNPGQSNRKQLICEFYNGVNSNTLKLGNWFECKFYLYTDGQRCAPIEQTQALLDY  
 VSSNRKGSTNVNYNCDDSMIDSLLYDIHMTAILPGMWADYLRPTGVTAVIDFAYVLTRTGLLRFYDNSRT  
 GNVVSIDLLEPYDIGFEKFSYSRFLRIAASYKKGTTVYLLNPKDSQKYLARTWSLGESVNFKPSKFSSE  
 YHVAMLTGYQIRRDYLDLIRQEAGDLQCKNINAGNTTAAACNNIKDCYLLDDYGTIFVSANKSETGL  
 TLAADSKLMQAMKTDKIFIGKAKDYQATCSEVQTVNDQELGWKTCPLVFVYFFISNEDGINLKTFFPI  
 NTKEDLKNPSKPSQDDDIITNEYNKARPCLEFTIYHINKAFTEDLGKKRAAFCKQEIERGQDECSTRSYS  
 LRKIKNTNLSLLVADSCCTLTGAGSCPASENILTPEKFLSELTPEKESLTKDALCANLKEDNIRRVLLDK  
 LESTDNITQSPCSSAIIKIVFNSLFFRMILFYLLNLMFT

>E4YHU9\_OIKDI

MEVDETCKEESTQQEMSIEDQFRNMRKLYPAVDESITPLPRFWSHKELSSKLI IQQGTRVEYKGPFSK  
 GYKDAASARTNTEIPAVCGMYFEITVISKGRDGYIGVGLVGHIDDSQHLNAQQGGYNRLPGWDQDSYGY  
 HGDDGNAFSAHGGKYGPIYGSQDIVGCCINIVNRTIFFTKNGSNLGVVFEDVPDKPMYPTVGLQTPGE  
 LIEANFGEKPFADFESYLADFRRDQIVQIKNFSVGDAFQQNIQKI IANYLHYQGYSKAAAAFEEATQTK  
 CQAEIEVTKKTRIGIVSCILRGELTEAIARLSTDFPNLLESNHELVFQLKFQQLIE IIGGTESEMKNYKD  
 TENSFGRLPGDALQDFIEKGRNLREYVLANIDNHESKMNQIKKISTLMIDNDPSKSPVADLFKTRRQR  
 VATAVSAAIRQSQKLSARPKVAVLVNHVRLLDHTLLQRDIPQAAFTLPENFLNE

>E4YHV3\_OIKDI

MPRNSIFPREDLSLPTINEHKIDGEVFIIEVDNSASRAPKLHTRGKWQRGARLAESAVVQNPKISGLSKR  
 FQVSSLTSTDIVTCALNTKHV

>E4YHW4\_OIKDI

MSSLMSPRVEINGEVHPYKNKYFCNSANAKNTAYETWSSSKVFAAANAGSTLRKGSPTCSPRNFGDLAKVW  
 GKNGYTKLADLVTAVVSYDETAGYSSNGLSAYYHDIGGRDAINALVKKRVLVVFNLQYRMTWLGQPQNS  
 LGGNYGASVPSDLGTTFINEYGEACAIPRDNPSQVYPNSLTMLARRDVNSRKRYNSWCTLKIIRLILVSYF  
 PGFLRF

>E4YHW8\_OIKDI

MGDRFHRAAKDGSSPQKALLKEATSRDLDRRKEGTMPTLIAAQEGHSEALMICIQRGKPNLYNAIGQ  
 TALHLATDRGHFRIVDYICKYEEELVKILFLMDLAGNTAKMLATTQGHKKLIALDRNEAELIKRNPCK  
 CKKYKDKAKKEMEVCCKKYSKIMAKHKTEKQSSSAPAKKTVYGETSVTTKTTDGSNNGFLGFTMGKRIG

TVRRKEMLDQFDFSAMDEVDTMTVSSNKNVLFQGQTVKNTAKNGTSKARPDVRFIFGQNGDLGDGLAEN  
GELGTVSAVGMISTNRFFFNALAEQFDVLAATTTGATFIDKNEESDSEQGCHF

>E4YHX7\_OIKDI

MGVSRQSDPKHEKLSQSYNLVWHQSTKFIITRELCSLRKLIFYDFRLGIKKILLSCNLQDGGNFCITSLWK  
FVTFGGEPVAVNTIYSSSVDKSGGNWAGLGFMSMAGDMTIADLFICKRLGNATKLVSAYSSKNSRPTEYSN  
YTGILAQTVETSLRNPKNSTLGFWCSTMTTNHTKMSANSSTTFFYNQTSKYHAI EAYGQLTTWDLTFH  
DGTAVAKDVIDGFYINEKNKEYVAATQGTCLKFKSHGALMILAWGFFIPAGGLFAAARYVFQKGGWLFNL  
HRAFMI MGVLNIAGFVVI FVENGGFVDPGYALGYAHAVMGCMMVGYSLMNVIRGFFRPDLESPPRRKFK  
VTHFLFAGLAI VLSNTNIT TGLYMVSLKASAI AFVLSGICMLFIPIFHFWLSSDDLPMPIHNLVLTGVF  
VVL IANTIAAATEFLLNT

>E4YHY0\_OIKDI

MKFDLHFYEFSRISRMQLLRIADRNI FQERINQKLNAEESRSRLKRRKEGAWPSRAKTSWWEASTAQRCK  
RNRSA

>E4YHY3\_OIKDI

MNQVVCRTTSTRERRRCVRS AERTRLQVGSRKAARSFCQRRQHLITVTNLSEELEDSIAENDTFSKQN  
TKLSKQNSNLLAKVDELSKDNESLQKSLEDVDAVHQEEIQAVLAQRDQLKSQLDPTALTKSQA AEIQK  
LKHEDLVFKRTESQTFPRSSSPTQSDTKPDIKLMAKQLKQNKAKIQALEAKLKEREENCASYKTINEEL  
EAKVAKNERDYLNLIYKESEMKLVFEKQVKELTARVLNQEEKNQEGIAEVDEIAKEHREKTQELEKLEA  
ATRQNDSSDRIGMKKEFVEILKNKDLLETTELVMKKQLEDTRTIAEAANDHTNIEKKLEFYMDKQCQL  
EAGVMSDTAKKQAVDDNERTL KALHLKEEELQKTETMKMNIQRHCQTLIEQA EKQAQSQLEIEAELEKL  
QNDKRDVQSLTEQKERANELQTELKKT SKKLNVENEHKKKYSMMETQLCEQVAEISQKLEEADAKILG  
FKTMAVDNDEAQA AVADGISKLRRENSEKREQIQSLKDEL DVSTKQLQNRDLGCLLREKDLKNKVS ESKE  
LVAQCEKEKSELAKKLKKAASDI IADLRKQNDSLDNFISQGHKLARIEEELNACQRILEPVNARKIE  
LEEKALYEQYLANKDMNIEKERD MYRESSLRLEKERGDLEQKLEFERISGETQVAVAQMHAQNKDET  
KKLVELHEKTINKYEENIKELEEEVAEKMSRINELIASESSNTEQDEQIKLLRDSHKEELKRRDSL VKKM  
EEDRALLTQMVSEAKDRADTNEDSAEKFEKVLQRNEAYELVKNVEEMLTVKTKRMEQLEEMRQSLEADL  
AEQTQEYEAETNSLLTAKAEAFNKLKTI EKELASEKKAKLRLKRDLEQDQKIKKLSADLESEVTAYLRQ  
EIGNLTSKVKTKDDELSRMAVRLTTL EEAENL LFSKADVLEKQLSEERFEKGAVQE QARILAEKLEALKG  
KDSTVSADLEQPEKESLEEKLSKTTDGPETIEKLNETIELLRDAESSMFSKIQSLEKELAEQAKXXXXX  
XXXXXXXXXXXXXXXXXXXXXXXXXXXXXXXXXXXXXXXXXXXXXXXXXXXXXXXXXXXXXXXXXXXXXXXXXXXX  
XXXXXXXXXXXXXXXXXXXXXXXXXXXXXXXXXXXXXXXXXXXXXXXXXXXXXXXXXXXXXXXXXXXXXXXXXXXX  
XXXXXXXXXXXXXXXXXXXXXXXXXXXXXXXXXXXXXXXXXXXXXXXXXXXXXXXXXXXXXXXXXXXXXXXXXXXX  
XXXXXXXXXXXXXXXXXXXXXXXXXXXXXXXXXXXXXXXXXXXXXXXXXXXXXXXXXXXXXXXXXXXXXXXXXXXX  
XXXXXXXXXXXXXXXXXXXXXXXXXXXXXXXXXXXXXXXXXXXXXXXXXXXXXXXXXXXXXXXXXXXXXXXXXXXX  
XXXXXXXXXXXXXXXXXXXXXXXXXXXXXXXXXXXXXXXXXXXXXXXXXXXXXXXXXXXXXXXXXXXXXXXXXXXX  
XXXXXXXXXXXXXXXXXXXXXXXXXXXXXXXXXXXXXXXXXXXXXXXXXXXXXXXXXXXXXXXXXXXXXXXXXXXX  
XXXXXXXXXXXXXXXXXXXXXXXXXXXXXXXXXXXXXXXXXXXXXXXXXXXXXXXXXXXXXXXXXXXXXXXXXXXX  
XGQLLQAKFKQLDEFATKIDEAKRISDRQEMTQEAMNKLSHLVRAKDDEIEALNSKNQSLTEILRSDDAS  
SHINSKLEEIDALNKRVI EQKQENGKLDKAVRKL ETSCLMVNKQFEEYNEAIVSERVDMRSLISSHEQLH  
SQAETELELAKLRIIVGKIRAHPQSSKIAESSPSTVEINGDRDMLAHSVKNLRERCAGLEATNVAIKR  
DNDALRDQLMDRRDKWDNLELLNKKMAAEISSRDERMAEHLESIAELKANMIKKDQQLKDTEKDISELDR  
LRERLVQVDLHSEELQLIQSNEERLQE QVDSLRSGLNDVTGARKDLEEKQENARGQEI KEKQLLAELE  
VAKKRDLANEKSI SELRQFIDNFRDQK GKKEIYIF

>E4YHY5\_OIKDI

MAAKPPKVTVEERSSLGGRVAKAIMSFSFRELFNVKGAIQADFVKSFGQYRMPMGVELLLDELIVCNMNN  
 ATVELVNLGGETEVSPLDQVAPNEDGQAGPLNYNKPSIATMLMDSTIFVCDNLGCHKYIWFDFDNDTVRFV  
 KTI RPTPEIYGMCVIREDNGGILFVVQDARDRLIRYRIYDLLEEKKKDLPVVFPPSNEEGKEKKTIRF  
 AAGVGNVTVALSDMSKLNQGIWLTDTDGVVRRKIGDKQSDSNGEFIQAAGICFDSEGNFLAICSSSRIQC  
 FDSEGNFLCCLQFPEGAIQRPSDLSINEQGELAVVSLTGQCFLFKLQAGDPTNAYVTRGPRPDHKSQYK  
 IGRHGRSNRYWGKPNGDRGRGRGRGRGRGRGRGRGRGGGRCVA

>E4YHZ7\_OIKDI

MGINEVKIAIAAIIKAAPDNQKAI DTLEKILKNILTHPLEAKYRKLKVAGKVFTETLLPVDGALDFLYSLG  
 FAESDDGSWLEIAAL TSESKTMLVRAVFLKTNQSSNESAPLRDSGSQSAPQIPPAISESPSSSRKLQN  
 FNSSFLEIQUERILRLRSSAMMHVRQWEDPKTKKKV RDTIPVTALFKRASELLEQNSADGFDRGELLKHS  
 LLITLTDWFKNEFFKWT DGNIRYNNPEKLELTREGMLSYFCLCCFNYPFKIEYNIFITRKGRCGEWANC  
 FGAILRSFAFHVRETYNVLEDHVWVEVRTLGRWTHVDPCEDAIDKPLMYKHGWKKSCHLCLSFSVAEGAR  
 DTTWRYNNLHAELREARKQLVIESWMNSFIKKYEERKKKIMNWEKKMQEEDWITEAVEFLSPKQIGSDLK  
 FSDRTTGSQWRTSRGETAKNIEAKVFFYTKIKEESPEFVFSYNCAKDTYSFNGESVSSWATFAHGGRL  
 FRKEEKDWKMCYLAMQEESTGEAEVEFKFKLPNKQISSILVTAHSATYENGVNWFCSGESCTKFNPT  
 QFVFPPEPSPDSTVSIKASLVAPNFWQHAQLFRQALDDTSFMFEVRFKF

>E4YHZ8\_OIKDI

MSLNGNWKKTATEGEVEFGKAISWAGASEEEWKAQCTIPVEVSYKIDGDSVESTRTYGGAKAISNKGAFN  
 AENEYNFLGNEMKVKISGKGDVIMESVSGWATVTVKVDGDKM VETVKHNESGAVLVNTWARA

>E4YI01\_OIKDI

MEKFMNFSSSSSESEDYSDVSETTESYSGDLEEKGIRPDRVSDDEEINPIRRRKNPYCRKCEKFGGVC  
 EDNDVSSFDNSDDEDQAVKMICSKYMECDPDFLEGVAKPVCQDQNVKYESLCLLKLTRCTKQENLTR  
 ASCKGKPTRIVVYSKTDEDYISSYSENPLDFYETDDFEVVLPKSTTVRTTTEKIVTSTEAKKIPAKD  
 KTLAIVIGIVEGLAFLTLVAVLTVSCYLAKEAKMNGHQHLESVETAPLTQVKEKRKSVSTIDSSI

>E4YI03\_OIKDI

MSILQNRKKTVPQRQLQSKLHLNIMKMLLAGVLASWVSAQYSNFYDYDQTYYGKSQVAQSEGYSPEVASV  
 ARTLGNGRICWSCLEETTKCLLDDFSATTMRGDEKRHGAVYCGEDYFCYISERRIIRHSENNWYENG  
 NPWQATNPIDVDHAELINGLAGADPSTEVRVQMGCCQPLSCLRQQWQNYQIQMGKSFQQGTVALVDGAYV  
 PVGSQTEVRSGLCRHNAWVDHASGLHTVNDQWRKHSWMDTSQPGNGKVQDQGWGDRRFGAIERHFQRG  
 KATESVCHHCCDPYLEYNAKGCNNVAATAYAVA AVDRVDETAETAEANIFLLRPASETSLDWSSASGK  
 QYHGAFRNPHTQREKEVLGTT

>E4YI10\_OIKDI

MEFFLDTFWREKVRFFRQVVFCECAGSNYSFRDKLRGSSARAVTCQPKCISAAPTCKVQTEKYHFFIYF  
 LNLYISLI

>E4YI12\_OIKDI

MKNTDLEKVGRTSRAAALPTVIAKSNQSESAGDQPRRGPLCQNQNLNCQLHKYFFEFFSRENHLKRQNG

WRITNASCEPDQREKNSQAWKYSFKSQRYKRKQSSRRSLPPRALHLRRLRLCYLRDHHESSGFRRTI IQS  
LKL VQNISS

>E4YI21\_OIKDI

MKTFKTPSPFEEAKKTGENSSSKSVTIKIDEDIQQVATDEHHARQAAQITGATPFHIAKQELSQEMSAAN  
SLDILLRPTPSADDMIEEIEEIEEPEPETIDIKTQPMHEISYIPAPSQLQRNQQAFVKMAGGKIQQVM  
MQNPVQKPRQIFMGANGQLFEIQSPEPKQEPQQPIVIVLPTSKNGETQKILPQNLINNSNSGQQVIYVI  
NNQNSNSSKNTSPSSSFGESSSSNSNVNVIDLAATRAGIRTSQIEVKEEDSLVKADVQGHAYSPFSQ  
VPVQERSHQCKFCHKRFARSDECKRHERIHTDTRPFSCTYCDRRFTRKDHLRTHTRCHTKKPYKPCCE  
RSFARSDERIRHLKIHVKRGETTMEEAKSKINEALREQTVHKKNHIIFEEVKSESNIPIITNINFIQEDK

>E4YI25\_OIKDI

MYYSIPPEARHDSREMQTCQSIQSLNGNRRQPHMWTARSGASYIPSYANPMSASVGYSTPNHMRVSS  
NLTDIKTQTKTSKEKSDKCFKWRGLIAILSAACIILLLLVAVVSFKFLLPAVGNSPGGDTQVTGGAGVRI  
IDPAVSCSSNSPVWDATEEIVYVSAIESLITPGSNIPVLYVPEAGHVNFYARTDRPECSLVLMARQTLP  
PKLSAHDFLSLSGAYATSKADNSIMYESRISRGLAAATWFLLLTNDGSVTCQVTFQTEMTDSSCPNDCS  
QNGICFESKCSCFAGWTRDCSIGICAPVCSGNGIVAGFLDSCVCPGFNGRNCFEKSMDDKPCDETCQN  
GICDNNKECVCKSGFSGRNCDTKTCVNDCSGNVCVSNKCRFCNGYSGADCSFDNAADESAEVCSGNGL  
LIQNEFCDDGFTGQVCEKEVVKEDVAHNCYPKCENDGRCVLNDSDWKCECKAGTTGVNCGAKIEQNCND  
GLDNDNDWLVDCCDPCCSSPSCAKNSGCKTSSLNFQINGDSTLSKIHALARQLKLSRFSANEKLAIVT  
GIVEDENLQGIRGVTVKSNGEVFTAETGHFIQVQAIGCEIYEFERNGFCAKELMICAFENIEYQAPLRL  
YPKNSPPDFRLLPPPALVTIQSDFSNLLPNESSLDDFPVDLATTRKVSFSSEILDGTLNLRREDQDHFT  
TVFVFTSSTNQARVLITCDGSEVFSETFFKLEIGTKQLAAEWNFGNIFGQQSESVSGSCQVFIGSRYDL  
ESPFTWSLARLALVKAKEPEMKQKTAIANFVPDFMSFLDRENGIIFHEKNSVIQRFSMQLEKELKATVQI  
PVDAIFESDDNNEEIIIFSKNGFFSKSPKALRRVFTFQNAVGFSSKSPLSRENVFFISSVDNIVKIENW  
RETNVFRESGGKIGQVVALSNDELVFVRGDNELVKLSNGKVTVISRQDGLLEPCRGSDFRRLTSIKLQ  
SIKDIQFDYSTKQLFVLDENNIWQVNLRTDDNWTRRIISSSCGQRNEIVSGASSLQIGQNSAILVSNQKQ  
IFELVGD SKFVPILG SCTDEV CETISSSSAAKFGAILAFKRVNDGFFVDESSGAVQIWSLKPSRATKSP  
SGYEVGFPDENLIREYLPDGRLLVVVDIYTRKTLKILTYKNNRLEQIANYYKNTIKITYESKSRIILLQNS  
HNRARAQIMLRGQRPVKIEDEDGSTEFDWGDGNLQKLGPFYFLTYINSRIARVSLDNFTIDLSTISSFAG  
LESYSVSEKCTTKLGTQVQGSYAVLLLDNSNRLTISADATVSTSSDFWKNVETFSRDPITSQPSLFG  
HESRGFTKIPDRTEWISTLSNERKNHVTRMRREGATLMSYELDYSKSKPTGKTYDQLKTFTGTLDLPA  
GAIERLSLEYSETGQEGNKIEFSYSTSGALVGWKQLRDGVKIGMSFSRDRGNIVEVNPSSAPLRVDHR  
RNQLKVTTAAGSTHELGYKLGNSKWESEISRKYPGQEFNRRREGKTSIYTRNGISFLQIKDAGLYRTI  
TNTIDGQDYNTVELYSCGDIRWRKSAVESVRFEINKDSSSTKVIYDSDQLAIESVKYKNLLSSETISIS  
GSPKVSVTYAYDSWHRVNRVILEIPGFRSISRVIEYDGDQIYAIDKFSFFAFPEKALVQISSASPRMNL  
RKNHRSTGRLVASQLKIGEEPQFQSQIEYNSLQVQKEVFETLSTNNETIFNTEYDEDYKPTRSSNGEKI  
LYRGELADQLIFPNGVVP IARDHLHRLTKFGDIRVSWTGAEQVNLGSDEIEVNYKQPVKINGARVHFD  
SENLPRAFNGKEFFVFSNSKLLYHVKS RDITEYFYDPSGHLFAIARKSTLSPQVDYFYVMTTGEASPALV  
FDENGKIVKEVRYGAFGRIFADSNPVFKLALGHRGRLCLTATVCQTKEKIWIQTLTGEAFNFAGHVAELE  
KLGEIDKARSTLPSTTWWPYSAEARELINSKRDRLLVVEFFNSINIPIMPEEAGRLF

>E4YGV5\_OIKDI

MRFRTRLRDPVKFQRAGNVGIVTLNRPKALNALNHPIVKMMRPQLKTWEESGIDRVILKAEGGKAF CAGG



DIKDLTLPTYNGDYDSGANFFREYQLDYQLGTFPKPVISLIHGVMGGVGISCHTPIRIATEKTLFAM  
 PETSIGLFPDVGGGFFLPRIPGFLGLGTGQRLKGPDCQHGHVSTHTISSDKLADIEKFLIDLLENL  
 CAEEIGEAIQRFQISIGEFSLAGQIDNIQKYFENPKSLVELVQELESSTGEWEQKVAKKLRMSPTSLAI  
 TFKQIQDGKNSFYDVFMSMEYRLAYQCLRHEFPEGVRALLVDRDNQPWNPATIEEISDSLMQTFEKEP  
 NTHPTKPWE

>E4YGY3\_OIKDI

MKIAVLFASIGNVYPSANDQNLQSLGQLYKAHGAIANFVYEQLPARPTVRKLGGRSKSATAQTQERLSKR  
 LLELQERQEHIVKRCGPGGFKSEKGTKDSDDQDGSPLILSRGKFDNLDLLRPSHSTFLPDIKSQEISAL  
 DFDEPTDPFVPSGQAVAGGLIESPFFDRIGGRGPSYGPFGPMAQGGYGGFQLEDFDPLGAGNFESSVRR  
 RRETVDLEDIRATRKEMIKKIKELEKVFSELEDFVANSLDCSAQRVKLHKYKLDKVKGRFQKVIERQGT  
 AEIQRRRRMRKTTKPRNMN

>E4YI28\_OIKDI

MKIEPENHEIKGKPPKMEREDLLEESKLGDFDFFTKFPHVSKIQILWFFLVNYCWWVGGVLVQSILDTRYN  
 TSYEELLFSPKSDCSQSFSNIDSLCSSNMSLETCLQQLADNSGSLEIEACSSGYIFDKSVFTRTVTDFE  
 LVCENAYIESTISSIFFAGLFFGVFIFGPITDKIGRTKASVIASFLNFERMISGFFSISAGTGFVYVYME  
 VIGPKYRTWFGCMTQGIFAVGYALLSLVGYLLKDWQDQMIVLTLAPLFIPIFLYLPYSTAWIYSQKQYK  
 DARENVKLIGKYAIEETDEKFLDELENSVKAQQKSENTGKIYTIQIGNWFL

>E4YI31\_OIKDI

MTYNLDRNRKSRIIPKRPAQFGITKSKVRIHEEKISEGFAASDSLCCFSDFSRPFANGLNLTQNGIPVS  
 VERLENDPWFEEETKPVLYKSYSELEGILQENRRQMRDFVSRIPRISPKHEPPNPHCMTLAVWQPPPIIP  
 ADIPNAPILQEANSTPLQSPQRPRSPENFEITERGDNLSPERMDID

>E4YI36\_OIKDI

MLRRGFFCARSVVRMSSEKAPAVQKVATIDNQVTHTGQAFPEGDFRMNRYLGGKKKALSARWAIDMIAEE  
 PVMSTQRRHMCDDGTGYGLNQAUGHPRVWINLDDGEIHDCSYCGLRYQMIKKEDK

>E4YI40\_OIKDI

MKLSAALFVAATAQEVGSDRWYSDYAVDSVSNYANGKAGAAATSGAYGYGSGNGRFCHSTKDTVHIHRWD  
 VSKNGYFSHYNPVECVGEELYCFVEERAHFGQIIGIRAGCAQMMNHPQVERNDADDTNFDGLPYVEPVYN  
 QEAARGATFDQNSYGSISIIYGI GGCLAHPAQNGNDQLHEDFLTSMQNHNYRHHGGWYQSQCRLRTNGAN  
 GNAELLFPGVSVCRSCCLATYFDDLYKDADTTARVADTPTEEGVNRGICNFLPYPLPAGGNIPDQTAFD  
 CKQGTQGSQSACVSTNDDSDDCDFCTQLAPSLTMYEVPSYLSSTFSQNLFESNFVRPDTDTAGPCDSGT  
 CTPTAVISQPMA

>E4YI41\_OIKDI

MIFCENSFLIVRRHLLIRGLSTLPLPPSQPNTIYNQPPPPLPGTVVPPRRGPAKIIISPGAPIDLDDK  
 QTQKREYSDSQTNRRKEKLLLRLLKRFVSEKTFVPEKGGGLESWTERGDFDKKPPATAEEIINASQLPDH  
 SGAAGSNGSSGSSSTMPQRTRAMPNLGKIDDSRKPMPGAGTGSPA KSGVVYGASGGQGYAESNAVEN  
 WSQDVQF

>E4YI43\_OIKDI

MKCVMENNVGDSVMVYIEDEIGEHEFKREECLPKRSRTSKDIRFALKKLIRMEFLWRHLNIRALKVSLMYT  
 KNMDVKLEPHERFNPPFFANKNNSTCVRFKIEELNRARDVWRWAKNEKISSVPRKKVTGKRVKEDMKLA  
 NILTMFKNNDVKKDENSMDSMKSEDSRSREPPLVNLTNIPGTSEMNYFQIMSEDSNSNQ SINCEPRNPA  
 KNSTMNPKASALVEEYRNIDENSMDAMLAQIIDDPKEREALLSFSGAKAKPVVNHSLKLPQTKSTKKTRGR  
 PKKTPPKGSVQESTIFQMFKKADSKKSNK

>E4YI44\_OIKDI

MAAGVPVIAMASGGPLETVKNGETGYLIPPEFGKIELAKTIAKFIEEFKQSEMANNCAKHVANNFSFEAF  
 TSQLETIVSQP

>E4YI46\_OIKDI

MVYVTAKIFRELCERREDINNYGVSLHQQNNGFAIDPVPEKNKATDESIKATTFLAAFALEKSNQC  
 DRVPFSSILKPLFKDVLGGHLRNIEMENNVRLDELDSQSHHITIYGDEDEGRLEVISQFITIHEILSGEH  
 LPDGDDAQINETIESIFRDTKESTQNKRDFCALHYGVKRYLFLNRYLQKINIPRIRAANIQRGETSQKTM  
 APVPSATPPRIKNAFLSSFTAQGSRSPTPPAVISLDDCEESHPRASAAQINPEDLGAKLIRDVKERFPD  
 WNREDAEMWFKYMEECNISNRPVNYNEAMERVKSVAAPPAEPPFDGSVNEAIGQQVIKEISDRHRSDN  
 VKAQMEMLQIEEYKRSERIDVNDAMRRIEAIANDIDFKDIEMEADEPPETMGIDADVIEVWFQENYE  
 DTPAYNMAVYKSDLFKEFTSHFELYSGDNHEKHYNFQIGVIHALLKKKHVYPNVKTKGNTGVNARKRF  
 AHLRRKGTKTELQVEVRSPKTEENSIPGWTNLAAVVNPRIAPILVEQSFRTVQAKKAESNPKYTLRCP  
 WNERFSNLYPGGVDGDPTRLRRIVIDGSNIARSHGKVGIEIRRHKCEVFSIIGIKITVEHFVNLGCRSVTV  
 FLPHNRQNGKMPRIPEKERKLEQMETEDIKYTPGRYHKGTKQFIQAYDDRYILDMAKAEDGIVISND  
 HFRDLYDEFKDVINWRLLP

>E4YI47\_OIKDI

MHALKTMTDEVVSQKIDKVMKLEAARDEPDDFGFVSSDYKPEIVESDSEEEETEFVEEEMSAYQLA  
 IRDDILDQLVETGKVDTKSAFQTLRYSDQLGILDEIRDSFKFDRSYLTGHINSIKKEENSQKSQEEQDK  
 EFSKYQLDGLLSKNNIRKEIRKVEDESKNNLRDIENSQGLRKAGKYYALFDHEDIPEKKEIAKSIFD  
 LEDKKIDQKGTLESSESEDEFVSDSEYDVTTEEEIKVPASQKHGILGLETSVGEIESSSTSDIVDIEIP  
 ESILMLARLAAQKRDKAATMEADFKKILESSDSDVQYVHDDKVRKAETLNGGDATPQMPLCALRQYLD  
 KSDDFVDVTDNRRISEVNESTSFKEFESFDHENDNHQVKTNSKPTEDITDSSNSVQTTTDYAKLEEFVN  
 EDKKEHPEILEKCNDEIKEENLQKSSVFPINPLVQEKQIFLSDKTEIKAENIKNRDDFPINTSLVSEKH  
 EFLSEDEPEMNVEPLSPYLNFAKEVWEVLIMEMAEQVEYAIKVKFEKLQESEVLDESWSSFIRETIT  
 DIALLSLDKELQKKKSSAAVSDQIAEFTAASVLEENAVQLQLSSALKITSVPSQQLYKDAEMLTLFGC  
 GVFFAPGEAEAQCAEFEMTNITQGTITDDGDTFLFGGRTVIKGLTLGNMVPVKYDIQETEFSSREFLIALA  
 QLTGSDYCNIGKSVGSKTAIKILEEFDDRRSEDPHLTLNTFSKWWNTHHKSLLTGTNGIPLRAKLLKLN  
 DADFPSDRSRHAYLHPNVEKLDKIRFTVPLNRIQYAARKLEWQEEAIDQHIIPLLPEKMEKRKDIR  
 FYMKAK

>E4YI56\_OIKDI

MKLFTGFTLFVAATSAPKFGGQREEGSKVQKQAIKDKIQGLSEEERQEKNKQFAIMDKVKGAGQKGP  
 FQALKEKLEGLSEEEREAAKQKFMAGKKDKIEAMREKFKLSDEDEKEELIGADMLEKIKEIKESMKDMSE  
 EERAAREEIREKIKAKFESLTDEEKAKFTQFFAAKDRFQAMKQKREKQKRGSKSAWGKLQAMKEKLAG  
 LDGDQKEALQAKIEAMQKREKQKRRANRA

>E4YI59\_OIKDI

MEGGDDFFKKRLEKDLAELKKMIDSHFVQREKDEEELATLEQKIAERKEVLTTRKRFHKPNKPFQMREQQN  
AERARKNQRERREPLQKEAEEARRLEEEARKKKEAMDKNLNSGQPRQRKGGTARDVKKKILADRRKPL  
NIDHMDLDKQKQVTELYDYLSLENERADFETDNEEKYETSTLRLRVNMLSGAASKEKTKRIGRIGVK  
K

>E4YI61\_OIKDI

MREVASSDFEKKIEKNVKFYFQKMTKPKNPEKINRFLDAGQTVDFGSEFKNPEILCSILKNMKSLELE  
QHRKIEVDKNATVPFDIISSHLDALGAQERHELGLLTPDALFGGFETQNVALLMMLKDFYENAPSPRSS  
FSSSSSLSSVSSSEDETKAAYDQPSSPPSSRMSSEVENEVLPSFPASPEEEDSSLRGRPETNVVDSR  
ENSTSPSEVQVESSGLVSKKQ

>E4YI65\_OIKDI

MWILGLFSLTAALKPLKYSSLESYSDFCSEISTFEAEYDHFSTRNTQKIEIRVITDDRFYQAGGPVLFY  
TGNEGDVQLFCENTGFMKAGKELNAKLVFMEHRYGKSIIPDDKNLYLSAEQALADYAEYLVLKSSGVT  
GPVIAMGGSYGMALAAFYRIKYPNLVAGAIAGSAPVKFLPGLFDCRGFYRVTTTFTNTPSEHFCSNIR  
KSWETIKLIGAHMVGKRTLSEVFRTCPEITDVEPLLDLFLEDVWGTLAMMDYPYPTNFVGDVPGWPVNVAC  
SHLDHDINQEELLEPLRDAASVYYNYTGDLAACLDLDEGGDLGYNNWYFQTCTEFVFPFCSDGKEDMFRV  
HTYDFPTYSTNCQQTFTTPREHWAEMFFSVETMKTIGGIIFSNGLLDPWSSGGVLTQEEAGPRNYIFIL  
SKGAHHLDRADNPADPEEVTLARTEYISIMKNWIAESISKTASSSISDCSKLLFSSKKVHGA

>E4YI76\_OIKDI

MRISSAVVIAASAQASRKEQDRKVPPRHPSQRLTTLINFGIEWCHDNLRNIDPDSVRGDRLADRFEFRFT  
IWGAKLRKLVVEEDCFYFNPEAPNGGPGPSRARRAMFDESKLDTDDVHDDLQRYDQTNPIRGLKQITTFW  
KWSRRYIAECPGQPKNKHAKRAKTIYSKILDYKLLVQRQEEKANKL

>E4YI85\_OIKDI

MARTKYNARKAHHAHKPKGPKVKKPKPESSSDEDEEPEQDTGLVDPDKAFPDEEDETDTIGQSIWADQM  
ITNSVQALLRSKPDTPLAELAEFCRWIEKTIICRPSKPNKYKRWATIKRSMLAFDDRQIEAASKFLITW  
GQDSSKNLGSPEALRAASSGKISNERYH

>E4YH76\_OIKDI

MSVKWHQNFDFSNFHRIFDILSCI IELNAALKPANPKALQFDDVLDWKDELEEKGHLRDEGKIKTIVLFM  
TTRGSSCKTPITQAERARIPELDFVSLIIGENDPPKEWQEAFFKIPETDEERLDRLNIPSSSTLSSQIV  
NEPLLQTRKKRSTEIVAQDSERLKRSGQIVAQKNKEIHKEDEVAQYFLKVENFNTTFEYRMAQVTELI  
CHAKETETRYFSIRACDKAGNCGPLPSLAPVRVTLYNSSLKNLVGLINSLPRTCPT

>E4YH98\_OIKDI

MKIKKMLSKVFKFEMLVVFAWIHLTGSITDLIIDKYPIIWARSSWINFRDLCNSVNSKDFRKKLEKAQEV  
YEIREKEVAEMEHQRDKYSDDIDQARKNLREDKANLKAQEDIIDNGKDLAEMCENKEKQFEEYFLKCD  
DLDMRNNLVAGSILGSFFCLTLLHSNAKPNFETLNGAKFVGAMLFAMIFTTANAVQCIIHVIFYWFEARK  
ELQSGDIHQKNLYKNLNYGEQPKDEIKLICKYDFLRYNLIVHGCIFVSSFLMCVVLVCLNFKKAKYYRK  
SMDLDNAPDQERAEEIKEKKHKEELKILNIPKAGENPKEQKKGWNSDSKETTGLAKNCW

>E4YI86\_OIKDI

MI IHNEGQTASFGPSLILAATFSLIVVAVKSASCFRKHEDDVPSTVDSFTISRWSCLCNWWGKSDPLR  
 WTDDDNKFTTDSVKSMNIKKEPKKVRDGGKSYLPKGVDGSGSSTKKFLELAPEQMLPQADRRELEDNRLVM  
 KAYLISKLVAAARYDFADGEMTFQEQAEEKQINVDYKQRTQNMDDL YAGQISVDTKATRKQQRNALKRL  
 KKSNNMRPKKIKELAKQMKEEANRPAPAAVDRQSSGIGSTGDISKADTTT VATTTTNAASNSEYNASGS  
 KISQFLRKFVKSSRDSAVGSSLGSDQLGGVAVKHTEKNNNWATAKKPSHITFAGA QF

>E4YI92\_OIKDI

MECSPLDMFICSA LSPACVDNDLSGTLPYLVPPPRELCELVTSSCAPLISEFDIQWPAEFSCDRLPR  
 SSEAQCIPPHDLSQPLPFQLSWTSTEIKEENSYSQKEEIAKLCPAEQITENDEVTYAGIKGCTGPCEPKE  
 TTQTETKLVRLIVGIVAAAGAIASCFSITCFYIDKKRFQYPEKPAVFFAFICYAGICLIVLVGIVSPFRIA  
 CASNKLENIATGEVFEQKGLINGIDKNTCTVIFMSQFYLAGAALCWWLILMISWALAAIFKWSSESISQA  
 APFFHLFCWTFPAILTSTALYHRLVAGDAYLNSCNLSSTTFSNWVLLFFPTVLFVFFTGSAIFMAGLFALR  
 NDLTPKSKSALVVHRIILFTIFFMPLPKSAFLLLKFFEADHKIDWEEAVLQGSNLRPGFVILLEKLLPLL  
 PAFAPLVWAANRKSLEWRGSSSTASSVLTNSSVFGSGKGETSLKSRKKAESIVSERSSRADASLLGRIPT  
 VPDNLLV

>E4YI93\_OIKDI

MRLLYSLFLSALAGNYETFGVEKTATTKEIKKAFRKLAMKFHPDKNKAADAEEKFREIAEAYETLTSEQ  
 KRASYDASGFADAKAENHHQKSDFEFNFQFFKDFDEFFKTKDDPTKRQKRSSFDFDDIFEGMENEENEI  
 FRTFLGEDFFGGLDLGSMGMKMGKKFKIKTSSTVTKDGNSETRSFQDSKSNVKISKSSSTNGSSEINC  
 KYVRIEVS PGNFEQKYVCEKDEL

>E4YI94\_OIKDI

MSRAKPALARKPSTVCKFRAHWGYEGAADDELSFEEDLVYISEQHDGGWWRGTCKGRSGLVPSNYLVAD  
 EDEENGSGNQIDFPLHEGAKRGNLEWVDECLNKVPINGQDRSGSTGLYWAAYGGHVEVVERLLQNKFT  
 DLNLQNKLGDSPLIGAAIRSHPEVVDLLLKAGADPSITNNTDGSALSVATNNQVKSLIKARLGLKTERKN  
 QSDYIGAESDNDSDA

>E4YI98\_OIKDI

MKRGDSVLIDEDQIETPLVKTEIVDPDWIDELSQTQKQWLGVFLAVLSGAFYGMNPLPITLAVEQKIIAS  
 HMDGVLSHFSGVLIAQLSIFIVYSVYRKS KPDLYPSAVIPAMITGTTWAVAFLCWLYANSILGEAFTFPI  
 LATAPSVLGCVVGIYFFKEVSDKKSII LAVIGSLTCIAGVICTSFSR

>E4YI99\_OIKDI

MSRKAEEHAKAYSSRTIDSAGALLLSAVYRKLDPQTAACEALKTGLERCPGSLDIMSTQARLEQARQNHE  
 KGDEIYSEILKHPVNQEALC VLVKVKSF EF

>E4YIA0\_OIKDI

MVFYFIGLGLSNPEDI SVRGLRLVQGAKRVYLEMYTAILADWNFTRPYPVAVTRLIC

>E4YIA3\_OIKDI

MAAKEEATRRIIPDLICLLQTSFQFPFSGKKAQADLE

>E4YIA7\_OIKDI

MARFYQLEFIFSTRRNSDARRSLMMLLSNVSISPSSNCKVYSHERSESCSNSSLEIDSQCFEINKTQEEA  
 CQEFVFDLDLIYYTISIENNLVCNRNWNKFIITLTMIGLVIGPTFSGSVSDKIGRTLCCIIFSFITFGF  
 ALTCGLGYHWGVFAVFRTLVIGSAGVGVTYFVLMETIGPKYRPICGLLYISTTIGLGTIMLTFVVA  
 FLKNWEYAQFFMAFTAIFVGFAAARICSETPRWLYSVKKEEAREALQRMAKWQGYRIDSQAQFEAFEKNMK  
 DDDKRSAAESEQNKKNIKDLIASPFIRKVTIILMLNQFVRGIINYGFLFNIGSLKGNIFTNNIFNNLMI  
 PAFVICACLINTRLGRIGNFIWTLYLAGLSSFLIFFGHLFELPLLVNISYVGMFASTAATSVGYVYTAE  
 VYPTDVRNVGVCSSSFAMFGALLSPSLAILEDYVWWFSLFNGVIAVIAAGSLFMLPETIGNPMTATTE  
 EFTALYGKRSSKEIVEKYTKKEESDSKNGRHANGSLENPSFKDSEL

>E4YIA8\_OIKDI

MTADLIDRQFKLGRQRFVWSCILIAIECLVVKLNNDLWLDPWQMKNIHLSIFFTSVTVFFLMLAGI IKM  
 RNSNKKRLISKKKMMLTIMIFLSINALFSYNIATLSTSSQPLSGHDYTGWILVEMVAGIIMIITLWP  
 YCGIEHYQSYRPAAPSQSCHRRSENIIEKYQNIVSREIDEDLPKYENLFSPSN

>E4YIB1\_OIKDI

MKIEPENHEIKEKPPKMEREDLLEESKLGDFDFFTKFPHVSKIQILWFFLVNYCWWVGGVLQLLTIKRYQ  
 ILTDFRCRSTLDTRYNTSYEGLLFSPKDCSQFANIDSLCSSNMSLEACLRQLADNSGSLEIEACSSGY  
 IFDKSVFTRTVTDFELVCENAYIESTISSIFFAAGTGTFFVYTMVIGPKYRTWFGCMTQGFIFAVGYALL  
 SLVGYLLKDWQDMIVLTLAPVFIPIFLYLPYSTAWIYSQKQYKDARENKVLIGKKYAIETDEKFLDEL  
 ENSEIGCFNEKNIKLIIIDQFKKDLFKPKMRLITLVEMYQWFSTLVFYGLGLGVGNLGSNLFNSF  
 INAMIDIICYILLPFFMDMKCIGRKYGTWMTLLGSGCFLTAVFDYLENENPENSSYGILKATCAFAGK  
 FGVAGTFGIYVHASEMFPPTVRGIGVGLSSAGRLGGMIAPLINGLNKTSWLPFIVFGVLGLGQIFTA  
 FLLPETLGVPLMTTIEEAEEFYHCPENFKKSAEEKQIE

>E4YIB3\_OIKDI

MELQAAKYASSLHLLTKFKGVKKQKELAESICSRKTENKSSDNSFDKLNQKCANLLESESANSIGL  
 TMIENSKKWKSLPKAFSLMSESTDLISKSSCEIANETESVAKQIKQASLWINLCGKIYHLEERDDLVI  
 IVACWAHQPLVNNENAFELLAASKYISAYSA

>E4YIB4\_OIKDI

MKNDITEDVQIQALRFYDKIRNLDTNQYDILKGVALGYCLGRAQSCEFIELLNCFAINFSTFFHFCQFSV  
 SLTFKKDEIVSLKKLGEALKTEAFGGRELEKKGKQSTSRDVRLRKAYSVSFGPRLAVDEQLSGRALRHMD  
 SVDFNSTKTQEELAQQKQMSRVIDDSARHHYSISPELEAKTQEAIHNKYGGREKAENAAKVIQQFYRQY  
 RLRQSFRKLRAAKTRRLTLDLNELEQARKENQKQLEITQISTSSSESSTTSSLKSPKRSPSSPPPNE  
 SGSKSDLQIMPPEKAESRLSSISLDHRSDLSELLKHRESYADSDDSEEEQSTKSRPPSEAKSFDSDSLI  
 RNQRLSWVSGSVGNTDLLRKRMYRIGLNLNKKPEKGLAFLIKQGFVEDSPNVISNFLITRKGISRQVI  
 GEYLGNGSDRSKILKAVCNQMDLSDLDVDEALRKFQSSVRIQGEAQRVERLVEAFSQRYVESNPEITRK  
 LNNPDSIFVLAFAIIMLNTDAHSPSMRKEKRMSEEDFVNNLRGIDGGQDLQKMLQNVYRRVKNKEFKSV  
 DDHINQVLVIEQRIIGKKPALALPFRRLVCYCRMYQVADVTRPQRPLHTREVFLFNDLLLVTKVCARR  
 SQYTYRLDAPLTSLEVEYFGNEHYPHAVRIKTKGVLITFSLPNQDDCKNFIDISESILEVRQMESLRI  
 EESLESLEEQKEAQKSPLTASRKLSSSLHNIISIRDLSSSSTVSTAIIDASEK

>E4YIB8\_OIKDI

MPLFGAPKLEDILLTLRMQEKTLEREAKRAEKEHNALKAKVKKAIAEKRIEFAQIHAESAVRKRNEALNY  
 LRLSSRLNAVGSKIKSAQSMKNVTKELGKTTTSM EKAMKSMNLEKITATMDNFEKQFEHLDVVNSTMENS  
 MEGAMATGGQTAQVDDLIGQVAAENGLQQELELLKAPEANKATAAPAAAANDLNSRLQALRN

>E4YIC3\_OIKDI

MSHLWQLSDGVKLERNGVERSDRSNSAPLHQNFGISLHRSATFNLLRGVKRSDD

>E4YID1\_OIKDI

MDKLRILVDLLNPEKAAAATARMNFRPPNGGCSSAKRYRTKGKTVFTPDYHVQFSTLRQEEQNAIRDHI  
 LQSLTTEENASVWSAVAEISAGILRKNNEWPAFFMIVQQACENQPAKGAELLARMSTSAPAVVREKTTQA  
 KCLELIGACLNHSEPAHLHQGLRAFSSILTELDENQNAKSLLRQSVGAVQSIAESGEGDWAAEGFEVF  
 QSALDCPISLLNADALKDLSTWAAQVFGTADADAGLRCCAGNFLTQAVSSKSKFVKKKMTQDLMHLCFP  
 ILMEDEEDEDDEEDTPRSIALQLLDTISIKLPNTEVLGVIMEFATRASQGAHQKRAALSALAVICEGC  
 ASPLIEGGHVEPLVTFAGDSLQSDNPALRGAALYALGQFAEQMVGAMTEFAPRVLQVLTGLLESCPDLM  
 KHSQLEKGLYCIQLAETLDEDQIENLLPSLMSSMHRFMQMGNTDKCQVATLAVSALGVI IACAENVIGP  
 HLNCISMLQALLPKSAAATAEETPENIMLQASALDTLATLASAAGESFVPMADSLSLAGQLVSAETDP  
 DIRRAALNLSCSVVSLPNSPPQLLEAVPRILECLMETLSTEGIGVKMIGDDENEIGSSAFDAVEDIDDD  
 IEDGDDGEEIEHFTIENSYMEEKHTALSSIIRMAQKIPQHIAPSSSELYQECKSLTDFVNEDVRKFACAA  
 LIHLGHAMFKVTGNETALVEAITKGIDTIGTFLIHRNLSKLHEFSSTVRMAMMGEICMDDDDDEDSDG  
 VKLEEEASEIEREILDGAGELLVAAAVDPQGVITEGLADILPAAAALMKKPDSGSKACAIGILGDMFDT  
 LGSNCAEGFVKQLLPVFMRTSSEDDNIRNNSVYGVGLIANSGETGIKMPDALKSLPLNESKNLQVRD  
 NVTGAIARMLYAGHAETRAAYSSQFLARLPLTEDHTEWRMTLEVIEKLLTEGNQEVLRQLQELAGHCLNS  
 VNNLNPDITADKKTILKIGQFMSQLSNADPNMFAELKKSSPEKVWNKIVKVNTKAN

>E4YID3\_OIKDI

MNILNNEGHNPLHKATIEGKDKFFHGLLDAGALPSVPSDSGRLPHLVLKHANSADKRRVDLLEKVLVSYSE  
 SEINACDKKYGGTPLHWSRTKEDVRLTKKGALVDATSADKSTPLHVMIKKQRTEAAYELVLSADVNAV  
 GEQNTPLHFVAVMAGNLQIKALILFGANYKMKNDKQKTPGLVALESKESSKEEILVALHEVDDLKEAKS  
 SRLNLRKNLRILSLDGGGIRGLVLTQLLIAIEQEAGRPIHTLFDYLVGTSTGGMAALGLMQKYKATDIQR  
 FYLKLKDECFHGKRPYHEAPLEAALQELYGQAKMLDINEPRVLVTSMLADRQPAELFWFRNYIPTGKVDN  
 FQAKTTDSEHKFEPTIEHRNDEVWKAARCTGAAPTFPAMGRFLDGGLAANNPTIDALVEIIGEVKEYNE  
 TPSEESGKESIKIVVSLGTGNQPVVKSRAVDRIWPTNALEAYKSLTATVELAKMFVDTVCECDRWWVYN  
 DETLTSSMAKQIFGDDSDAKEIWGVLCQCLKDKNNNDEDQLNNETMSPEKIKWISRRLNMDENPNEV  
 ESYQINICCGDISLWYKFPTSSGSQHSMIENNP IKGRIEPIPRLEPVPALPYTEQEKQSYYSIPKRKW  
 RVSFVVALGQG

>E4YID7\_OIKDI

MVEEELRKRATEKSEKDDAPEMKKKKKKRKLPLVYRGPETWVVMWMAVIGGAYWFAVNVYFKEIRILAS  
 VQDDVDKFEVVKCSPEHAKEPQVPRCTPTKCGRLVDGLLAPREIEVLKRMALIEGTGALGGGAGGASILE  
 LSSSTVSSGEKQSLFQLREASVKNNDNFRIMVERLYSKDNLGVYYSAKTKVATAIETAFGLEDDVLS  
 LAAPTFFSLSREPAKTKNDEYWHSHIDSKQYPSFDYALVYLNDYEDFTGGRFFFETSSIAGTEEEAA  
 VEPKAGRVSAFTSGAENPHRVEKVASSRRLAFTMGFTCNPEFAIADPALPLPDQ

>E4YIE0\_OIKDI

MGDQTSHALSSDIAKLVTVTLCLINIAVYTLWRSYIRPKCILPYQDPNYQAADHNVFKPTNLRFLV  
 IFMLGFIGAPIFILLGWLKVPGEHCFLFQLCFLTNAALYPLLLLQCMWSYRLYRLLYMRGNFYLKVSFAF  
 QIFTLVPFMLAFGYFNYQVWVWIIQASQLAFNNKSDATTGSENGFCFSYLDNNGTETTLLQYAIPIKVVVWS  
 SLGAEVFNMLLIVIFTINSYKEMKKIGYDMDALDGIQVMVKLVTAQI IHLIKWAALADPLIRLKWIDVIL  
 IYLVFVPIQTMIIFLPDSKWSRMVRNYVRQKLTAFANQVDLPMAPPKSSKVSTGNEAIVKVESEGKHPK  
 GSAPPTNTDLRASKTSRESEVQGNQGRVWDDDELATKAVKVFKEELAEMNRSGLPKIEDMVRPKIIEPT  
 ELRVVTKNPADKAPLGANYRINNSVYKGNKVFLVSQEDGYSLVKVSMDAGVFGAFKEAYTTKICENKYFL  
 KLFGITYPDMNPVFIYGRAKGSLLDVLRNKHQEVYRRLALKWLNQLLDCAYLAKENIVYREFISANI  
 IDSSEDVRIIGSIYDYRNISDEAKIKMHDLTREDGLEIMRCFAPETLRDETFTKESLMWQFGILYWEIL  
 TRGHVPYDQLQVSELAVNIEKGVRCRQPLECDLTYKVMLACWHPDPMQRPILKHIIDFMKQYIEILTTR  
 EASMFIKKYSNKRACEIVQSVDAAKLGLLEGYIDQEYFTNLKCLAEIADKFNIDNEETLGFEMEKEYDWP  
 NWALEVNSERVHVPIDIRKMEDPAKIQMPRIHQKKNLKLMLNQ

>E4YIE1\_OIKDI

MRITFLLFFVGTGQAPLFRSLQALIELGATEPTEPTTIERRSVDGMKFADYVDDCLNRAFSFSAASTG  
 LDDLMSFIKTCQKEAMDDFF

>E4YIE3\_OIKDI

MSLYPNLAEIPIRRDEEESESDVTIVLQIPDGSVEVYVRSNAPIATEFPTISVEDSPLGPVLKFNQK  
 IVLDQSFIVLHYDLEMYCIGGWQPIDGTDYHLLKLINPSEDLIVSTSCIFMNNARYKCLFSDEQIGPQ  
 AQEAGDIGKVSAGILYAADGLSKGISWAGDKSKAMMEGRAQNYVETTPALSNPKEVSPGWKKTAEVASV  
 GTKYVAKGTGLASAIHVATYAGGKIADKVQEKYAKDEKGETSSTWRNTTKIIGGALAGYGVWEALE  
 HSGKKAIVASRDTTAKVVSRSRGEAAGEVTYNSMNVGNLTKTFHIEDMGKICKTVGKSAAKNYLQK  
 HLDKAKTRDNQQISQNPMAIMQ

>E4YIE5\_OIKDI

MEKHENKKEKKKFRIVHPFPSTTEYEEKFGGLIHSPILITVQSANSLNNITLLLKVGTRGYLFRGITV  
 KSELTFSSTNDPFPFELHLICCCQQAYLCNVKFRVLVKEKDLESASFFNPSNFGAGKFHAKTSSEIDDH  
 LQICFCENALQKAREQFQKTKSKMNRTESEPKTQKEVRTMIAEESDLTASEANSIFEKRQMRRLALVSRR  
 FEKKINADAPIKRRKLQARVSKFKSAEKKEKNEKNEIFLLKKKVEDHEKLIRELQRLVRPDDIPQSSDD  
 S

>E4YIE8\_OIKDI

MSCVRLVLEIEIRHTREKFAQTKEPIFAGKGRQVFMPIPSSYWAIGNVQEETLSIKWTRSRNFVLSAMI  
 HSGAWQEPCHGAEDEFQEKGITNGAAWYSTIGTLQDYEYIAQGVMAFTLELGCQKTTAMANLPWHGYMGI  
 RGKVHDERGHVISNAEIFIEETYWNGTVALNPLSVLSDENGFNKFIFWSENATAKVSVHVTHDKFQEKTF  
 TLREPIRELKDFRHRQTNFLENSEYKLPRAIKIKLLKQRK

>E4YIE9\_OIKDI

MVINGVLDADFACLPEADVLEKPKQNCVVAGWGWSSGFENLQEKLVVRVIPDEVCPFRFDANFNKYTAAH  
 CSGTAGCVGDFGGPLICAENKSTGVEEPPVVRGIMSHTKGCENKPMIYTDQGYLEWIRQKTAVIAAQDS  
 GTRPTISPTTTDRPLTAAPGEPLPSGASCRNPIDGITRIVGGQTAKNGEWDWIVQFPQIGCGGSVIAKN  
 WWLTAACHCKPFALSQMLTNFGDHNIGTSSDSNFLRPIKIVHPQWNSKTFDNDVCLLKYSNIPYSDRV  
 APVCMKPKWDEEIKPGQVCYVAGWGDHEDSNKLNELKEAAMGIDPTLCSNGWGLSKRLNPNTMICAG

DLRGGTDCQCQDSGGPMVICIDENNPVLRGIVSWGLGCARSGMPGVYSKITRMLLEWIHKEVGVKVPPTAS  
 PSSQFINIVQTALPMDLLCPIITNDVAMAEKLEFSEVETDLMNKWADGFDDNYAPMARLVGGSIVQQKRTW  
 TFLTRMERSASATILNIHWLTAGHVCHGAKLPEFTLIPDQIRIHPEFDPDLLNNDVCLMFFRDIVSVFV  
 KTGDSVSTACLPTDDTDVVPDGRRCFVAGWGSQDEHSAVQSDFLREITVAVIGGETCNKEEMYDGELEA  
 SMFCAGSLDGAVDACLGDGSP LICVENNTPVLRGMVSWGFGCGRAGFPVYTDITKMSRWILQQTSRNI  
 ETEETNPALLPPNLKCTTRYQIEKQTKQGEIDDFGGRIVGGTVTEKGKWKWIVRLPTIGCGGTIIDDNWV  
 VTAACHFANEYSQFTTTGDEVNRIIPDRMI IHEGFDTKLDFDICLLHFEQSFELEKDDRIDLACLANKGV  
 EPVDGKRCYVAGWAVGEGEAQSPILQELSVNIDREVCNSDEIYRGGIQPSMFCCGRLVGGFDSCQGDS  
 GGPLICVDNGEPVLTGIVSWGFGCARKGFPVYAHVSKLADWIHTKTFGTAPVESTSISLVNEFDTQTF  
 EGVEKTFKPAEFIIHENYDHRTIDNDICLIRTSEKINLENPDIDPVCISTREPPVGRKCFVAGWAVKES  
 GQGATVLEIQAAILDHEICNGPDAYDGGINKDTMMCAGTMSGGFDSCQGDSGGPLVCVSPGREPVLQGI  
 VSWGFGCARPNAPGVYTRMSNYEGWLEKISADTSFTPEAETLSTTAGTTQAPLTSQKPTSSAPTTQTVT  
 QIAPEIFPGGTCPPVNRNSWTGSRAVGYFSFPADYEPGFGPSTVETEKGFVSGEIEAEDGRDGRIVGGLE  
 VSEARQKAWSFIVHFDRVCGGTIVARNWVLTAAHCCQPVIDATSDPAVRNLLMRTMLNRLNKSSLSGEA  
 VIPKSIHLHSAWNKGTLENDFCMVEYEDDLFAKTKATCLPDSAETMNELRLPILENSVCNHPQSYKGF  
 KEDSMFCAGHLQGGKDSQVLVGVVSWGFGCARPNFPGVYAKVSHAAAWIENDTSSTSTTTTTATSTIT  
 ITSTTTTTTTTTATTTSTTTATTTTTTTTTTTTTTTTTTTTTTTTTTTTTTTTTTTTTTTTTTTTTTTTT  
 TTTTTSTTTTTTTTTTTTTSTANNVKTSCGDFIPGVGFRNISKGGSLTICNANNICKNSCNPNEMLV  
 GPSIVKQVKGKTKKVLPAKAFISCAEKDTLGCNLPNGFVFADGHEGSITCAKTGNFETCTAKCSDSS  
 LSASIPTIFCKTIKRVTKFIPASAPEEII SPPPTKCGHFASSFTFEKSSSGSIGDCRQVGNQVCKVTC  
 EELAPSLLEEIQCRAAKKGFNFPPKIAKISCRVPPPLPKNVHANGDIFQVGPVRYNLDEQSLSAECDKV  
 KCVLSCKNAGASLKATPSKLPKNGEMI IKCGKGFAPKVKATCIGGSPQRALGGLFDDDETATKQNKKTS  
 CLNSIYEKYAVSPDSINVNCTGNKCLVSCKNKGKPPRHVWPDGSSLPRSLFTCKGRFSWSPIRGRIVC

>E4YIF9\_OIKDI

MKLSAIVLNGVSAFDMLSGTSKCGGLNPKEELRIGDLNNELMSEERMHMSLSTEKIVGGRQVDDIKNW  
 NWIGQLGGYCGGSLVADDMFLTAHCCGSTRIGQTVYFVGLNPWEDQGAQKRKQVSEMLNHPDFDRPTLT  
 HDICMIKLDSPIDQDRNRPICLADSASPKNTPAYVAGWLTSEGGPQRSRLMEVSVPIVTNKECQNAYS  
 HRPVDDTMFCAGKKEGGEDGCQGDSGGPIVTVGDGKVS LAGVSWGVCARPFGVYSRVDTQLDFIH  
 WSIQTLRGKYDGKLSNFDLKNALSGAQTPEGEPATPHNGKEAKNSHQSDDEDVDCHD

>E4YIG2\_OIKDI

MGDLDPWDFQDFTLRLTSLKADKWGKLVGNDDQKQLILDFLEKKDKLWLIITAQGGSGALTASEIPPES  
 SKTKGVFFFKREEKSIPEKIPNLVSGDLSQIPLDHLSSFVDDVVDGILSYDNFATWPSVVSDDVQAH  
 VHKLKSEVYEISGSVKGRLLPMPAGVENVSSDGLSHVLHKIEGII IKWTHQVKSVELEKSGQALIDGK  
 NPGPQEELKFADLSSNLNCIYEQLVSSKVKMGRILKEKDSSYFQSLAMYDDVRIHLEEARDISMHLK  
 PLQSLDDIEQTMSEIERKLSALYHLIALIWRSCDYRTPARVVILLQEVCFMIELTKNFLDPENLLK  
 VEIGGTRGHTLSAQVVVLYEEFQELHKKMSEATFDPLDPDDNRFGNLYAMFKEKLYMDRRLASILCQAF  
 DDCASVDQMFLLAIAGNLIERPVAEDFNPKYKVLLETDFDEELNTCKDIYDSCYEDPPLHKNQPPTAGK  
 LKWANELLRRIQEPRDRFNLESPLVQTEDAQIIFKKFEQMVLDINDFKKQTYAKWIATVDEDCTFNLSK  
 PLLERDAETNLISVNFNPKLEAVLREVRYLNFMGEEIIPDSAAQLEYKHDI FRQVWVSSLRQTVHWYNKVR  
 KTVLDVEFPLISSQLDEIDQKLNQGETTLDWGDVLSYITEIYNAVSDLEIRVQKAKDNVIKIQEIMDVW  
 AQSPIFERKHDSKEPGLLNLGDRDRLKKRYDIITTDGQKIHTLLTENVGFFKATESSTEWEAYKEYIDE  
 MVIEGLFNSIITSLEFMQDNMCAEVSPFFASELELRSPDMVFPQSLDQKVHNGFYDLIEGLLDDIYHISS



LVPVSGDEGYQNLMEHHMLNELRGDIMGRVNVKVMNDANNFCDNFEIYSNLWIDDRQEFLNQFLTYELT  
 QFKEQIDSYEDLYSQVSGFSATEIFDGWFRVSIKPFKQSLNIIKKWSYMFKEHLIKHVENSLVDLQQFI  
 VKTDEGLKSEVVEGDLGLVNIIMGFIIACKDRVEATDNMFSPLKATIELLKAYNHEMPEAVYKQLSDLPE  
 KWNNTKKIMVSTKQEVAPLQAVEMADIRKKCAAFDVKQYEHREAFRKLPMFQFSCEAPYDEIDLANKELV  
 AMETYMANLSDNAKLFEVHVPEFKQLKQSRKDVGLVKEVWDLTNIIVTSSMTEWKKTLWSAIDVETMETTL  
 GCLRWS

>E4YIG3\_OIKDI

MISIIIVKLLFTNSIVATVDLEKSIDQILACSDILGLDSEGHVPTICYEAAVGLTPNLRRGRRSIHQTPFQ  
 VPSMNQMCSSSECKRYRPLIRIDFIEKYTNVLSNELTSNPRQRRIDFIDIGSCAGTCQATFQHRNVHNKL  
 IEYFLSEMLRRITSRAFRRASNYVPIEDQMFGINEEQIELRYQFRKFFENELPESLLRDIDKNDDFPGL  
 RDFLKTGMNGLNGPGISEEYGAKDNPIKSAAIIGEELSRKSAAISMSYGAHNALNVRVLDANGSHEQKL  
 KYLPDLISGEKIGALSMTPTAGSDVMSMKTAVQPAKDYVVLNGNKYWITNGPVCDTLICAKTDPPTS  
 NAGSDITAFIVDTEGFTANHIPEKMGMRGSPTGDLHFDNVKVPKENILLGEGAGAFVLMRGLNIERLL  
 GAAMPVGMQAVVDQSFYPAHERKQFGRPIGKFQMLMQKMAEMYSSLSACRAYTYSMLRSADQDPEAMSN  
 HECASLIMFVSDACTKVALEGIQILGGNGYVNDYPVNRVYMRDAKLMEIGAGTTEVRKVILGRYFNDYFLD

>E4YIG4\_OIKDI

MWKLSIYKNFRQYFGAFIFSGLSSVFFTDILFEKKPEGVTNAPRIAKEIMRDHEDTRAFFNYDKNEFEH  
 PVEHLNAFLNFEGYTWVPLHKPSNCTKVHGFNQTTVLIGVKSHPGIEKRNLIIRRTWSQARYWTNQIFG  
 KTIQKTIIFLVGSTPTDLRDEAEYNDIYQWDFTEDLFNLTKNDHQLITFFENHCSFANFIVKADDDI  
 FLNPKVIQRLIVKNLFDPKRSVNGTYRNIPTGQLVTFDAP IEMFGSMVIGAKPFRDPLNKYFIPNSFYSD  
 AFGDYPKYFSGALFVMTNRALSIGPKARETPAFPIDDVWGMVLERAGLDNHLNHEYLMIIGLMNEQEM  
 KQANLNNTCFLAGMPTYHRLNLEVIEMTYKMIYSMNLEKCMDESILYDVVGRFYKKSQFIARELIQGDH  
 YKNKIYISQIIMMIEFKNGAAISSFTSEIHLPTV

>E4YIG7\_OIKDI

MENFATTYDDHLIQKSDGGEMNQLGGHFVNGRPLPNHTRTKIVEMAREGTRPCDISRRLRVSHGCVSKI  
 LQRYHDTGSILPGSIGGSKPRVTPQIVNKIRSYKRLDPMFAWEIRDLLIEDKVCDTNSAPSVSSISRI  
 LRNKIGNIFYSRQEDDETPPAKTQRTRKRTRPHQEVSSSTSAQAKENKLYSPPAMNHLHGNVNSGSHG  
 RFIAGSPGISSEASLICSRSFHSSSKLCTSHITSHFLITPCPPTISPSISITITIKVQVTKRPVSRRT  
 NF

>E4YIH3\_OIKDI

MLMIRVAHFIIQLDDQSGQTHALISVTEEKIKALSKAADKSEKLGAEELTSRAANLEKEISEARAKELGI  
 EDMEEIAGYLRQERSTRIDNRRLDFQLDEEKNRELKMELEAEQRTVHYEERVRIGLMEKQLANI  
 VARGDSAEERGNMQELLEEQIALQKQRELESIEHNSNEDNLLEEVQRKRELVQAAEDRFDAEKKRIEL  
 DVIKALTEQLLQAKKQAQLLSN

>E4YIH5\_OIKDI

MRKIFVFLCLLANCFSEGRFIKKRINNPGSYRRAQNSYRKKERGSTPYDFSJKVKSYSITPGRGRVMASQ  
 PVELRGIAPLYIPIHDCRSNIEIIGTSSKKHTRQKSTSKIYAGVYHKLPLAQKWTRMTSNRKGQKINLFI  
 RKANFRFGRRYKFGWIMGYELQGGIRIRYFSTTKADCPAKVGRWFSVQHLRKYSANPDKLIQLRRQKETR  
 PVIFEIREQHFL

>E4YIH6\_OIKDI

MTTASASNWVGCHPDMNECYRTLACSVSMTYLSGPKYQFDSNGIPDHNAWGMAGNSATIVEQSNF  
 RVPRVPLLDIDSMTAGQGAIAFAKNGVSIFGPYNSGCCDATFEEIRSMYCLGHPANGNYHYHYFSKN  
 TEGGAGCLNSCAAGVSDLVGVAKDGFPYIGPMQWWSPSEEKIYLDAAACADCELRQIREYQTDVCGGIE  
 VADGSAEDGTTYRYIVTGTFFPNLQCYRGDISLSRTPAGAGWREFTVNNSCGINNTEGGTCELMNEDFLQ  
 SLGCTPGNCPYNPNTLRKLNWQSRTHVDDVYHQCDGCTDDNCITYTTTTSTSTTTTTPTTTTTSTTT  
 TTTTTSTTTTTTTTTTTTTTTTTTTTTTTTTTTTTTTTTTTTTTTTTTTTTTTTTTTTTTTTTTTTT

>E4YIH9\_OIKDI

MTGIEVPESIDFPKTEEEILKYWKEIDAFQTSLKQSKGKPPYVFDGPPFATGKPHYGHLLAGTIKDTV  
 TRYWHQNGYHVERRFGWDTGHPVEHEIDKTHGITGPEVAKMGIDKYNALCRSIVMRYSGEWKDTVDR  
 GRWIDFENDYKTLYPWFMESVWVFKQLFSKGLVYHGQKVMFPSTACNTPLSNFEAGQDYKDVNDPAVSV  
 SFPLRDEPDVALVAWTTTPWTLPSNLSLCVHPDMDYVKILQKKDEKKLIVLEARLSELFKNDEYDVLEK  
 FKGRTELEGGKYPFLDYFVADFPNAHKVCCDYVTADSGTGVVHQAPYFGADDFRVGIENNIITKDGLTA  
 CPVDNSGKFTNKVPDYKGLHVKDADKEIKTLKGGKDRVIKQGGIKHSYPFCWRSGLPIYKAVPSWFVRV  
 EHAREQLLKSNDMTTWPVSHVKEKRFGNLKNANDWCISRNYWGTPIPLWASEDLEEIVCIGSIKELAE  
 LSGVTITDLHRESIDHITIPSKTGRGVLKRIPEVFDWCFESGSMPIYQKHYFPDNKAFEDTFPAHFIAE  
 GIDQTRGWFTLIVLSTHLFGKAPFKNIVNGLVLAEDGNKMSKSKRNFPDPKLLFDKYGADAIRLYLIS  
 SVAVAGDLRFKEQEVKEMIRDVFLPWYNAYRFLVQNILRHQIDTNSTFTYDPALIGTSDNIMDKWILSY  
 SQSLIKSVKEEMETYHLNRVVPKLLKFVDQLTNWYVRLNRRRLKGETGAEDCVHALTTLTYVIDWMNRLM  
 APATPFLTEHLYQNLRRQLPANKQDGSIHFMPEVNDSLIQMDIERAVSNMTTVVQIGRALRDRKTLPE  
 KYPLPEIVVIRPEQVQLDELKIVETYIMEQLNVRKVTFSADRSAYGVELKAEPEIPILGKRLGKQAKALF  
 AEIRKMDTDTIEKLRADGKMMVGGHEITKDEIRIQFNAKSEGTVKYEADSEGSLLVLLNISLSKDMIDEG  
 VSREVVNRVQKLLKAKLVVTVDEVTVFYQTPKGYLDDVITSHFEKIQSAIRATFVKSDCPGYADVCGTTK  
 EEMKGEFFKTIVLNLQVAHGTIDPSAPVPLCVKSSDTSQVTTLENPKGRPAQKITVKSCGESSQDFV  
 NLEFVGNDRYGVVQDPKAAIILNFGHEVKSLEQVESLAADLFGWGGDATAALKLFFDKNCTKPKVSYSDL  
 KNATVFKNLAKPIA

>E4YII0\_OIKDI

MSDTEDEPSSQDIIEEEVGDMEVVDAKEAEGGENEVRKASGSESSEESDDEEYEVESILQSRFVKKK  
 KQYLVKWNYSDEWNTWEPMENLEGSQDLVQAYEKKEEKIQKEESEKAAANERKRQAKAEREAKRRERE  
 AEKEAKRAKKEAEKPKSEAKPKVDSKRKSRAIISSSDSDDAENKKPTEKPKIEKNKTLTDAERKKKER  
 KQDAKRKALKEKNEFRRELEAERRKNMTNAYKNPGVGKDDIRAPTPEVPEIQSERAPEPKSTEEVTL  
 RFLFGSDKESYGWQLPRVAEEFSRHKIVKQKVKCNVIDSMTASNIPPSDKAKLSHGETLIELTGTSSL  
 LSNLVLSIVRDLAGFRKSLPKYQSDNKHLVLSVIRNEFWETVFGKNAEFQGFQKCFSKLACGLDLP  
 DSTERLVHIQGDAGLAVSVRRIANKLGKAFGNLENANADIYQPYLPRCYALSGDQRVVHSHKIESAPE  
 ESRLSILSTITSGSCEVALAHQDENDHLDLPSLPPHGFNFILTGKSSCISIMKYLVEDGIMTKHLSL  
 EIELGIVKEEKEKSDREKESDDLTVDSFCFYSMSNLACDRSVNIYGFVGEFDTVAITEHMAQFGAVEKVS  
 RTEEEAFPVIVKFAESASALAAALKKRDQVIRGKILVIPFRFGDEKCSRVSRTVILENLPAMNESSLYTK  
 FRENGVAMARIWPENPKIAFVIFSTLKIAKSTENMSPISMQPIFHDEEGTKRVDHLLTSRIFKDLFTA  
 EQRLSIFEDFELIRIDTTDINRIQSIPWKEPIKLHSAKRPPDSSIPRRAKKPRPPSESLSIETSPIKPP  
 VKRPPPIAPKSIAPPSNDSVNLATVMTTQIVETNKQLIDARNKLVYKSSVEVSFVANADAKTQADMI  
 PDPQKQKYLNRIFQRAFWEKHNIDEWVKNDKQRKMRTRTPEPDLNDFEEMDGPWPATAEPLNDSIE

TSLGPPSSGILCTDEPQNLAEVHEFEMMDTIEDDPFLEPPSIGSSGGWNLGSGSSRSRKNSNKTSPSPQ  
 VGQFMPQRGRGRKRGKPDATPRNLNTSAQLDNVNI GSNLAATLKALGQNRNILDNLRNQPIEEEEPEMN  
 PIASLSANPPQEIRKILRNKLKGSDDLNNIPLKVMTEHNVYALIDEKHHDREHVNKKDPAKLISLIR  
 MYLTPPDDAQDINKKTPEKDSPKTPDKDEIYKCVFREFILESSLKLKRGKAIMTEIYDMNSIELEPGAD  
 F

>Q9I7L7\_DROME

MRFRSLKNIWPKEKLEQFLFLFILCGLPAIYYVLMETILPELSDYWSPGYVFQLLLGLFLFSNVMSNYVM  
 CILVDP SIDPKLMKNQLVRGQHS EDWHECDKCGILAPPRSRHCRKCGVCVLMRDHHCFFTGCCIGHENYR  
 YFFYFLIYFFLSCMISLTSSSIFYVLHGGRYQLFMLTHPAPNSAYFNLSLIRIYFKLPDIYELVFTLV  
 FVLLWIGVCVATYVAYDQWSRGYFCYDFELQNI PFDRKLRNFKTF LGRRMKWTWISGFVPSQLDHDGFD  
 LDPDNERVADWCSETTIKDG

>Q9I7M1\_DROME

MVTDAMEQLRHVFQLVIDEAELILPPNSKGHILRELKDFVAALDTLDFD DSFELNRLEDALEELESISI  
 AGSKEFESEADEVVVQLFIHQGVEDLEQILERNLETTLKIVEQKVEKYMSTWSDSRLARNAAMVKQFNDF  
 KNEKD VYEKLDKLTNSDFI

>Q9I7M8\_DROME

MASNKECLII VLDVRTCAAEVKLSAKCVAEILKDKIVCDRKYVSFVLVGC DTDEIKTEDASHPNVLP  
 FGEPRLCSWQLLEFFQFVNKTACEDGEWLNGLQA ALELQNVATTLRVARRRILLLDFDNDFPQDYEFKN  
 EITDELLGENIELIVGTHNIAYIDNAITSQPQAIFNFSRKCGPDELNNQKYALSLVPRCNATLCSFKEAL  
 HTVFKVTNRRPWVWNAKLNIGSKISISLQGIAMKNQTPVKLVKVAEKDEIVIRETRHYIKGTEITPLP  
 ENLITGYMLGGTPVPYDEAVLEPKEPHPPGLHFFGF IKRNAVPDEYFCGESLYLLVHQKHNSAAVKLDA  
 LVRALVSSDRAILCWKIYSTKFNRPQMVVLLPRLADDTHPATLYMLEVSYTSQH HFWDFPALRTTKTECS  
 EEQLNAIDQLIDSTDLECTLRDTQQPRPWAQN D LLPFDALPSIFEQNVMDILERKVIYDNDKEDKMLKDK  
 NFADVFWRPDPLEEKSKRAAAIVKKLFP L RYSRAWQEKL LAKEQAENGVAVKSEPAEKEIPLPSDGVGL  
 IDPISDFRRVLASVHTISNATERDARFQALAADTRVVIITLLQRKQNI GQLGELITLYRQSCIDFNTFL  
 EYDKFAEELK KIALAKNRSEFWQDVMVDKQLGPLVLGEPTL DDELALKAYYTIENWVESGANDMEDVEM

>Q9I7N3\_DROME

MVVCRRFFQQGSCRYGAKCNEHFVVKY LKADMES SLNGKMWPLSAYGPFKDKANFPNFIQDQSFEVRF  
 MCYEAQRNQFEQFSQQFNREVLEANNKMTMLQMSPQVLEMMIKIHE TPEGGTVSAAPQQSSNPFAAAA  
 PAAANTSASIFGKPTLSAGNIFGNATSQASNTNSIFGGTISNANARNSIFGVGAAATGAQSVFGPQQQQ  
 LQPAAQAFQGGNIFAQAQVQVAQPVNPNPFGGFGQQQQQPQSTGIFGQAASQNMGMFTQASQQLQQQQ  
 QAAASGLFAAAA SAFPNQQMQQQQQMQQQQMQQQQMHQQQQMQQQQQMQQQQQFQQQQQQMMQQQQ  
 QQAQPTNEIQSSVSRMEDLNEQEIEAFKADQFLPGALPFKPPPRNFC

>Q9I7P6\_DROME

MMSEEVIKNISSSLTYPKRIPKIKFGPIKDEMGTLSERLALRQAWNLRVPFERRYGDV FYSFLNDY  
 YWGIKKFRNGAELNVKALHSHALRFINFFGLLIEEKDPVVFQLMINDNNHTHNRCHVGSVNI GHLAQALV  
 DYVLKVFHKVSSPSLEQGLSKLVEKFQNYQDQSN TSGYNRLSKVNFDSRPPRGNP

>Q9I7Q5\_DROME

MQSNFMWLVAFLAIGICLAFPAGEAQAETIKLESENTGDKYSFAYETSNGISRTETGEVKPGAGEEDGS  
LSVQGSTSWAPDGKKYEISFTADEETGYHPKFRVA

>Q9I7Q9\_DROME

MSLASRILQQGSRLWNGLSAARGFHLLTRPAAPAIVSIQSSQLVAATTGICQTSGLLTPGSTLVQQVAGF  
KVKGRLKRRCKDCYIVVRQERGVVICPTHPRHKQMSMKRDRYKSWILTHATQSKERGY

>Q9I7R0\_DROME

MAAPVIVEATVKQTATLIFMHGLGDTGHGWSSALAAIRPPFMKVICPTAPTQPVSLNAGFRMPSWFDLKT  
LDIGGPEDEPGIQSARDSVHGMIQKEISAGIPANRIVLGGFSQGGALALYSALTYDQPLAGVVALSCWLP  
LHKQFPGAKVNSDDVPIFQAAGDYDPVVPYKFGQLSASLLKSFMNVTFKTYSGLSHSSSDDDEMDDVKDI  
ISKWVN

>Q9I7R3\_DROME

MDLEGKNVVYLGGFGGIGKKCVQELLKKQIKGLAIFDLIVDDLLAEWKKQHPDTEIFYQKMDITQKSDI  
DAAYKATAEKLGHFDVVNGSGLLDDRRIELTIQINLVILEIVLSKGFYQYFLKVGVINSTLTALEYMD  
KSKGGRGGLIVNISSVAGLQPTPLMAIYSTSKTGVTTFRAMASPIHYAHSGVGFITICPGYNTNGILKD  
IDKKTTFPFYETRMRTVFSKVKGQTAEVCARNIVNAIETAKNGAVLMLELGEIHELDIPNLWNPQLDDCV  
FVCLS

>Q9I7S4\_DROME

MECSDFMQQLRSFKPQSLGCAVARRKSSTLIFPLPPQACDEFCEEYPHNLMPTPGYWIECSRQKITMP  
TPHTIWDESDSEHEDIRAGSASDAYLERECSDLYEDDEDSEATPSPRKKTIEEQWQQGAFELISVEQE  
TYEKYFYGTEHWNFYTSDEDLGPVILSIKQETLNGRDQFRILVRAGSYTVHGLIPASCVFADRYNREEVV  
RSLGKEVNLNPLTLGQLPDTPEELLKLDQVFIKSELKVGIVFVKEDQYTEEQILDNNENSPLFDEFRTL  
LGDRVRLRGFDKYKGLDVTVDLGLFVYTNWRNIEIMFHVSTLLPYEKHDPQKLQRKRHIGNDIVCVV  
FLEADNTRFSPACIKSHFLHTFILVRVSARIKHKPTRYEVSVVTRDEVGAYKPYLWEQSVFEKGPMPREW  
LLTKIVNGERASYSAPKFARMQERTSQMLEDLVMNLSNHAETGQIPKPYRRGSRWPIGEDEYIKMLHAR  
VLDNNTHEQQQQLLQQQHMHTQHMQLPSHNICCYCNNATELHTAGAIHNNNDNNNTTTTTTTHR  
HNNNNNYSEQQQQLPQQQHDSQQQQLLQPQQHQLLHQLQLSTSSLTHTSCCAMLHLCARHSHMRPS  
SPLDSDVRDQFEDYDLAKDFTRVFLNEEPSCLTNAHLFDVVFLVGQSKQKARFIGVRAILGVRSRVFE  
MLYGIQTGFQSPQIPVAEIFARPAPSLVSPQNKPKSNNYLTVPDSDSIRPKSVSPSPMVKRAFSRLGTI  
TAGWGRSIRNKNTNQLNPDDKKKWSSTDYRDSKDKDKPKGNNQLAVPRLSVCADAQKVDRAKLAQTEF  
NIEFDPDTRVLLDYLHTGTCLTCVSIPLGLCAAHYDLPELLQACFHHCKQFLRIEVVCPMLISLEN  
YYWRYTSASELVNMILSFVESKAHSLFKCPEFLHLSSEMVQMIMCRELQTPEIRKFEAMLAWAQHKVVKL  
KNHPNKDTQFEFECIMERLTRDLNLCRISPELLTVVLPKSMKNERIMETLMVQVNLGTYRMPELDAYS  
QQLRQQESAETVQVHRAHQNHHPPIIDARAYAMASLAAALEMQSSNPLQSNAAARDAADDEEVELYASF  
DNAPSTSRVAAQMAAKEARRKRWAADGASGSSGDCGSCASGSSGGRY

>PUR6\_DROME

MSTTTTASIEGYKLGKVIIEGKTKQVYDLPEQPGLCLLLSKDRITAGDGVKAHDLAGKAEISNTTNGQVF  
RLLNEAGIRTAYVKQCGAKAFIARKCQMIPIEWVTRRLATGSFLKRVGVPEGYRFSPPKQETFFKDDAN  
HDPQWSEEQIVSAKFEINLGLVIGQDEVDIMRRTLLVFEILERAQTKNCALIDMKVEFGICDDGNIVLA  
DIIDSDSWRLWPAGDKRMLMVDKQVYRNLASVTASDLDTVKRNFIVVAEQLADIVPKKDHLVVILMGSASD

ISHSEKIATSCRSLGGLNVELRVSSAHKGPPEETLRIVREYESVMSNLIFVAVAGRSNGLGPVVSSTNYPV  
 INCPPVKSDNMQVDVWSSLNLPGLGCATVLYPEAAALHAATILGLGNFMVWSKLRVKALNNFITLKKAD  
 KELRGVRNA

>Q9I7T3\_DROME

MRALCLLPVFLVLLGRFCSLEAANILCLVSTAKHNNPGWSKPLFDALLANGHSLLVISTAPNPEPKQVDG  
 LVVYHLPNEYDVMKRHFLLPEPREYISMVTLNQLLVWYEVLLGSCRALLNSDTMSSKRPELTAQLSMEYD  
 LIITDVTQGI ECLMDSVSGWRSKPVLGLSAGKLTPLMSLLRAENTINAARIPHYISQVPKTMGFWRNLH  
 NHIMYYAEPLIHLVITRPVLSSELMKTENAFPKQLVLLNTHPTLDYVQNLPPGVIIEVGGLHIKNQTSPLP  
 TYIQEFTEKFFDGIYINMPYIEYMNDQGLKAMYTMIHGNPNVAFIWNVEQLEQLPAKKPNLLTLHVNS  
 LQQDILAMQYVKGFLNHGDSFSLQEAHYGVVVVPLPKLEEFNNAQRVMERNLGVMLQVKEFNQSSLS  
 ALTRILDEERFISALHQAQLKFRTRPQSALELAVWHAEQLIAEPRLFKHFAQTETLAQNFFVANSLDVL  
 TPLVLLAAVVSANLVVYVLYTGGSKRQQTLEKAVLKKRKKSKSSPQTFTPVNVTLKLETSELLEDLNN  
 EILEGEEELLKGEKPLEEKED

>E4YGN2\_OIKDI

MNYNNWIGMPDPGFLDTSIHLDDLFIQSQALKNEAGTKSKDDDSGISTGLNSDAGASSPESATYADTT  
 PLLSIKQEATESLQMGMLPTLSSPETAQLSDSYNSHSSSPETERTGSKKTAYNEKWGVKVKAWAIEN  
 QEQSDFENLPPDELNAILAKFWSEVRKSNGDYGRNSLFLNLRAMINKHLKGPYSVPPFDIVTDERFRSSN  
 ERLEKQLKLLKIGRITITHKQPISIGDLRRMYDSGLGTSNPLSLLRKVWFEITLHFCHKGSESQEKLLK  
 SSFEIYRDASGRAYVSRGRPHQNRGEIDVVMYETGGDLCPVKSQYLMLKHLPLQPRLFQQPRRKATPD  
 SPMWYKAPIGEKALQQMMANISAAAKLSKRYTNHCVRRTALEQFSTSRRVRPAQSSSVGSSPNSPKMS  
 SPEQSSRSTSPVQSPQMSPRQSLQLKAAQHAAQYQSLQAYAQNQIMEHSLNQMKNISQLNSFLAPQS  
 AHSINPLSSMGVDPLYDAPPATPVYHADEIEAGQHMSAHMSSPTNMSFDGASSPNSRASSEHRDSICKI  
 SSEDLLNFQASAEALMLQSLNSLQPDIQERIAAMGSLFGLDADPFSINLKHISLSGLGSGSPVSC

>Q9I7U1\_DROME

MSKDADVEQATKPESGVVQVEPAIPEQPQAAVPTTISTATTVIAVTNGEKPAATPATTATPATAEQVQP  
 ATTIAGIELATPTAAATSPPTGSGKANMDPALINFVLYVLTQLCGLTMIVLVATWIGQHFGLAGTSNP  
 GVEFNWHPLFMTIGFIYLYGNSILYRGRFTRRKTLLKTHAGIHMGAFTLTVIALKTVFDSHNLNAPPI  
 PNMYSLSHWLGLSAVIVFSLQYVAGFVAFAPGLRENYRIAMMPLHIYFGLFGFVLAIASALMGITEKAI  
 FAIKTPAYSTLPPAGVLANVIGVMYVVFALVYVYLATEPSYKRKPIPEDTALLNSSSVNE

>TITIN\_DROME

MQRQNPNPYQQNQHQVQVQFSSQEYSHSSQEQHQEQRISRTEQHVQRSQVTTQRQVQQHHGSGIGGAY  
 VPPSLTHVYAQGDISPVPFEQIFKNARFAQQGNALFEGRLRGNPKPFVTWTRKGAPLLESQKFRMSYNEA  
 TGDVSLINQIGPGDEGEYCTARNQYGEAICSVYIQPEGAPMPALQPIQNLEKNIYSNGYSYTSIEEF  
 RVDTFEYRLLREVSFREATRRSGYEQDSQLSQELDRNQGPAQAPQISQKPRSSKLEIGSDAVFTARVGS  
 NPKPRLTWFHNGQRLVASQKYEISYSSGVATLRVKNATARDGGHYTLAENLQGCVVSSAVLAVEPAAET  
 AYEPKPDVMAEQLEAGKALPPAFVKAFGDREITEGRMTRFDCRVTGNPYPEVFWLINGRQVRDDASHKI  
 LVNESGSHSLMITNVTRLDAGAVQCLARNKAGEVAIEAQLNVLEKEQVVPQFVQRFSTMTVREGEPI  
 SANAIPTQPRIWQKDGQVQISSAERFVGDGGATCLEIPRVTANDAGWYQCTAQNIAGSTANRARLYV  
 EVPREQPNYEQRRNLPRPTKVIEPEPIGPEI IYLRHVERAKPHLRPGEEDRVYPPQFI IPLQNVQQT  
 EGGRVHMEARIEPVGDPMTMVVEWYLNRPPLAASARATSVFKFGFIALDLLSIMGHDSGEYMCRTVNASGV

AESRAILSVVQRPSIEQSSQNPNSLQYINQLEDYSRYQRTESEDEQLNQAPQFIRPLRDLGEFEEGKNVH  
 FEAQVTPVNDPSMRVEWYKDGLPITASSRITAIIFNGYVSLNILHLRAEDAGTYTVRAVNRIGEASQSS  
 IRVHSRSQVTDLGIPEQQRYIEKVEELEDYRKSQQRHVQEAAEAIAPPQFKTPIQNQLDLREHAHAHF  
 EARLEPVGDSMTMRVEWLKDGQPLEASSRITTYHNFYVALTIKQLTIIYDAGTYTCRAYNAMGQDTTVAQL  
 TVISKNEIVSESQHPGGLQKIQHLEDSSRYGRREEEETIITQAPRFLGPKGTTKILEGQRAHFEARVEP  
 QSDLGLVIEWYHNGRSITAAARIQTYDFGYVALDISQVRAEDAGVYLVVARNKLGEAQQQATMIVETRS  
 SIDTSSMHRGLYEKTQNLNKPFFVEPQYDIEEISKSKPVFVTPLSDPKPIHDGKNIHLECRLEPMGDPTM  
 RVEWFHNGRPVTVGSRFRTYDFGFVALDIKATAADSGEYTVRATNHLGTAHTSACVRVIDHTDVVTET  
 QNEQSLEQIQLLEDSRRRHQEEEDITIMQAPQFTRGLHNIETIEGTNVHLECRQPVGDPMSMREWFVNG  
 KPVKTGHRFRPAYEFDYVALDLLGCYAIIDSGVYTCQARNQLGEAVTSCSVRIIAKNLDLILETQNESGLQK  
 IQYLEDSTRHRREFVDEVVNIRPRFLTHPKSLNTREGGHAHFECKIEPVTDPNLKVEWFKNGRPITVG  
 HRFRPIHDFGYVALDIVHLIAEDSGVYTCRAVNLIGSDETQVELQCRSGEQIVTVTQNEAGLEQIHYLED  
 RSRYTRREEIDESTKQAPVFTTSLKNVEIKENQRAHFECRLIPVSDPSMRVEWYHNNLPLKSGSRFTETN  
 NFGFVALDIMSTLPEDAGTYTCRAYNAVGEAITSAAVVHTKKSIIYESQHETALPRLQHLEDGSKRQRI  
 SVQDEFVSAQAPVFTMPVRDVRVAENQAVHFEARLIPVGDPKLTVEWLRNGQPIEASNRRTTMHDFGYVAL  
 NMKYVNPEDSGTYTCRAVNELGQAVTSASLIVQSKTSIQLETQHEAAMHKIHQLEDHSRYQRREEEETV  
 TTAPVFTKLIIGSNLVEGQSAHYECRIEYPDPNLKVEWFHNGKPLSTGHRFRTTYDFGFAALDILTVY  
 AEDSGEYTCRVNNLGEAINSIVLNVTSRSSI IHETQHEEALTKIQHLEDTSRFQRKTDEEQFHAERPQF  
 GRPLRNAKVNNEGAPVHLEATLIPVNDPTMKVEWYCNRPITGHRFKTTYDFGFVALDILYAHAEDTGT  
 MCKAKNAIGEAVTTCAVNVNTANKTLDLTDLDAQRLEKIRQLETYAPPPKPVVEEKGQKPIFLTPLSNLEH  
 LKEGEHAHLECRVEPINDPNLKIEWFCNGKQLPTGHRVRTTHDFGYVALDILYVYGEDTGTIICKATNQL  
 GEAVNTCNVRVLNRRSMILDTQHPDALEKIQKLESKVPNARTEVGDAPISPPHFTAELRGSTEIYEGQTA  
 HFEAQVAPVHDPNLRIEFYHNGKPLPSASRFHITDFGYVSLDITHAVAEDAGEYSVRAVNALGQAVSST  
 NLRVIPRGTIISDTQHPEGLEKIRKLESTAPHQRQEPETPGTRQRPVFTQPLQNIIDRINEHQTAHFEARL  
 IPVGDPNLKVEWYRNEKIIEDSSRITKQHDFGFVSLDISHIRKEDEGVYMCRAVNPLGEAVTTASMRVVS  
 EASIQMDTQHPDSISRHHLEKPLAPRPTPEPERLFEKPIFTQLLTGSELWEGTHAHFEARVVPVGDPSL  
 KFEWFINGVELQMGSRLRTHDFGFVTLDI TAVVPEDAGVYMCRAYNAAGEAVSSTAMKVTKSNIDGQP  
 LIPESWEAIRLKEAAMNRPVEMFVDSTPQQAPVFTTHLQSYDKLHEGQHVLLAEQVEPRADPNLRIEWFK  
 NGISLTTGSRIRSTDFGLVTLINGLRADDSAIYTKATNQVGEAVSTSSLKIEDRHWLQAESLHPDPSL  
 PRIGELEAPKEGRPEAPEPTYETPVFITHLNNIECKESDNVRFECNVEPARDPTMSIEWFYNGQPLQAAA  
 KFCSIYDFGYCALDLTNSYAENSGVYTCATNSKGSATTSGLKCTGGKTMFLDTQHPQGEAGLEAVQET  
 EEELANRYTSKTTKPEQYPPPVWTKPLQAEFHLSEAQPIHLEANVEPKEDPNLFIEWYFNGKMLNHGSR  
 FKMTSEFGFVTMDMIEVYARDQGIYTCAYNKAGEAFTSTTIFCSSKENIIESTQHPKGAEGLEQIQDLE  
 DSLRKDGSKPEQPDGIPPRFTTEFVNIADIGEGELAHFEANLIPVGDQSMVIEWFYNGKMLEASHRVRT  
 IYAFGTVALEVLGTKIEDTGTYTCRATNKHGTAEISCNLECVDKPRGQKPRFTSHIQPLEGLKDGQSAHF  
 ECTLIPVNDPDLKVEWYHNGKLMRHSNRKTVSDFGYVLDISYLDHDSGEYVCRAWNKYGEDFTRTTL  
 NCGGRGGVFDYSLQPDQLRIRELECPQQQADTSAPLVAEPPKFITQIVDVTKLVEGQSAHFEARLTP  
 TDPDLVVEWYFNGKPLPHGHRFRTHDFGIVILDILYCYEENSGVYEARARNKYGEDVTRASLKCASKSS  
 LILDSQLPRGMEGGLEKIANLEYSMVRTREETTEETKGAAPVFTVPLENIENLREGENAHFEARITPADD  
 PKLKVEWYWNGRPLKAGSRFRFCDFGFVILEISPVPEDSGEYSCRAINEYGEAVTTATMKIQGKRSII  
 MESQLPKGMEGTIDRIAELEGLGSRSTEFVDDDTGKPEFITSPFDMVIGENALAHFECRLQPINDPMS  
 RVDWFHNGKALWAGSRIKTINDFGFVILEIAGCYQRDSGLYTCKATNKHGATVSCKLQVKGRQGIEMEP  
 QLPSNFRGTGLESQKLEETMHKREELVTEDEQPNPPKFTEEIKDNLDPVPEGPIHFDCRVEPVGDPMRI  
 EWFYNGHVMTGSRVHQLNDFGFIALDVDIYARDSGEYTCRATNKWGTATTSKVTCKGKHNIIVYESQL

PEGMTSEKLELERGRPEAPKVVVEVFGPPKFTTQITSVTVDEAEAVRFECQVEPKTDPSLRVEWYRNG  
 KPLPSGHRYSRIFDMGFVSLDILYVYGEDSGEYVCRAINNYGEDRTRATVSCKKLPTILLQNQVPRGMKR  
 SDALQTMEATIKKYTSEVHLTEDDLFDPRKQPPRFVTQIKEQLTLEMAVTKFECQLAPVGDPMNKVW  
 FFNGKPLLHKNRFQPIYDFGYVAMNFGWVYPEDSGEYVCRAINLYGKDETRAIKVSQKPGIVYDSQLPA  
 HMQSIDRIEMEASWQVVPDEVDPDAKPRTKPVFVSKLEPQTVEEGDPARFCVVRTGHPRPRVMWLINGH  
 TVVHGSRYKLTNDGMFHLDPKTRQYDTGKVEVIARNSVGESIATTELKVVARSDDYRNVLKNSPRPWYD  
 YELAAQKERQENELEKVFDERKQVLEQSSHTLKGVEHLKPKQYKPPTPDWQQNVKAKKSEDYNNKLT  
 LETEQLLKETNLRDTHQYAIPEGKVVSSSQAKGMAQSYEENLQEKSTTEVQAAPPKGIAPSESSVHG  
 REVHMNKQQVQKEIQGDLEITRKITATETTEVEHKGTIQERVVQGPVPAKAPVFTKKIQPCRVFENEQ  
 AKFEVEFEGEPNPTVKWYRESFPIQNSPDLQIHTFSGKSILIRQVVEDSAVFCVAENRGGTAKCSAN  
 LVVEERRRAGKGGIQPPSFVTTIQSTTVATGQLARFDAKVTGTRPLDVYWLKNGMKIQPSIKFKMLEEDS  
 VHTLLIIEPFAEDSGRYECVAVNAAGEARCDGDCIVQSPSKPEKPTTPGSEKAPHIVEQLKSQTVEEGSK  
 VIFRCRVDGKPTPTARWMRGENFVKPSRYFQMSRQGEYYQLVISEAFPEDEGTYKCAENKLGSIQTSAQ  
 LKVRPIENLDAPPTITALKDVSVTEGMPAQFKTTVTGKVKATSVQWFREGQLIPETPDFQMIFDGNASAVL  
 LIGTTYEEDSGIFTVRVTSSTGQVESSAKLTVKKRRISAFQLRTIDSAEDESSSGREDSAPESPHAFQP  
 GQQPGQQFGQFLGVNGGQGHGRSRQKKPKVRSKSLQPATKVIPWRKSSRPTRGRSLDKGVFLPGFKPEP  
 VKSWTEETINLKATPIEKKKPKAPKLEAAKVVLSIKTERDQGIMSLGATLEQIIAGKTEKEAIPWITMRE  
 KLKAVESVQQNLKNFDLDEVYLQPLEGQIETEGQLPQQAQVEQVQRTKEIQRKSMESVEIMEMTDQIDK  
 LITQQQNAKDLIPWKEMRQQLKSVQRVTKQIDKFKIEEVELRHLQAQQAITEEYQTGTAEETVVMIDESS  
 KGSISKVLRREDEQLQYEDQSNYKQKFITTEDVNIHVSEREKLEAQRILREQQAVNWRQQQRPQLQPL  
 TSVEDTVISQTSERQKLQVQSFIEEAQRQQFVQVEDSQMMSLEEYEHQKIINQRTQQEAFSWRQPREPQ  
 KFIQVEDSTLLHLQERHDTQEQQLQQQPVMWDRGRKKPDQPQYVQPQEQRVKEEFVEKPKTYEEMHDEL  
 VEPTPIEQPQVPMWVERGKKKQPQKTFEEAHDELVEPTPVQPEPVPVMWVERGKKKVAQQETVLSQE  
 VVQTSQVVEQQIVEETKKTAVRRVIPPPEPEQKVEQVTLKPTPRPRPKAEVKAEEIQLKPLRSTRPVQP  
 VEAQKAYEEATDELTEEPQPQVPMWVERGKKKQPQKQEEVTEIPKLTLEIAVDTLEEEVPKPTPEPQP  
 VLWARGKPKQKPEQKQELPKSLEIAVDTIEEDLIKPVQPEPQVLERKPKKQKQDVIEEKLDVAPT  
 KYEKAVDVLPEPKVEEKPEPVLWQRGKKKIPKSEPTTEVHPDEVDAQIETVVKEDEMIIEEKRRIKKT  
 KRPKSTKEVTEELFEEQPEEEISPEEEVPQKEVIEEIEEIVEEKRLKTKKPKLTQQVTEETPHEEII  
 KESEEVVQEQUEEIVEEKKKVKVKKPKTVAEKQLKEEIPTEETVEEEETAEDQQLVVEESKVKVKKP  
 TGTVEKTDVEELPGEVVPVEEVVPEVPEVPEVPEVPEVPEEELIEEQEEIVDQDEIQEQKRKVKKAKKPKKTIEKT  
 EIEIEEDQPEEEVLQEEIIGEQUEETERQRKVKSIKKPKVVTektVDQTEQPEKPEESQAEVETVTE  
 EPKKPKPAPEEAKVEQVEKISLKPAPRKQRLPEKEQVEEVLKPVKKIVAVSEAEQPETPETEFVKEF  
 AITTTEDILDVTKRVRKPKTKVAEEESTEPEAEETEFEEATQPEEVQPVEEIPPEEPQVKEVADER  
 KTAPKPKRKEEIEKVEEVALKRVTRPKKELPQEATIEEVLKPTQRTSIKPEEVKLEEDLQHVKEKE  
 DEIVQEERKTRKVKKPKHEDLPEIPDAEPTQLEEAHIELEKQPKPEEDQPQVWKRGEKKQPVVEEVL  
 EKKWPSGKRRPLPEQQPEEVQLKPIPSKPIEEQQKPEKAIPGPQLVPEEKPESEEELELEPLKLPEDKK  
 PKPKAKKEKPKKPKKATPSVDEVSEEAEPFDEPIAEDEVEEMPVDDVKVAVSEDVLPPEEVVPT  
 EETPEAKQKAHKRTRKLEASVEGQPQLLEAAIAEIEKVDEISQEISQKTITLLKKTEDTRPQFITTEQ  
 LIELDVEDVRRDLEMKVTSNIKKEKRRVLLDSDQLPELELITQKRIQEGIDKVADEELIEDQQLIQNQ  
 QETTSEVIGQERKLVKKKKKEIKPRIITEKLPRQCVPEEPTVLECKVEGVFPPEIKWYFNDILLFASE  
 KYEITVMEQVAKLKIAKVTPSDVGVYTCEAKNEAGVATSRTNILEKEQGVPPQFTKPLKIEFIEEKQPE  
 RLKVTVTCQVTGKNPEVKWYRGIEEVIPSETVQMFYDEKTGDVALEVINPTPNEAVVYSVQAQNFQGRA  
 IGNANILSRVDEVPREILKAPTVTPLSAVVVPTGGTLFFEAKYDGLRPEVKWMRNGREIENEETIET  
 TETTTTIKVVNMTRKRTGKYEVWAKNKVGEAKSSGSVVVSDQKPEQIKPPRFIQPLEPKYFGEHEVAII

EAI VESEPLSSFQWFVHNEPIKSSNEVRIVSQANKSTLLIENFQSKFVGPFTCRAENVGGSVTSTATVNL  
IPQEEAEFEFESPRFVEELVQPVEVMDGEALLLTCQVTGKPTPKVEVYHNAEKITENKETTISQDLQGVQC  
LQITEVFPENEGQYECVATNKIGKSVSKTNVKIQAFEYIPDSEITGLTGSEEDLLDRTL SIDEQAPKIIK  
KLPEKIEPKEGEQAKLEVQVVKPKPKVWL RDDEQIFASEEYQIENFEDGTSVLVINHVYPDDLGTISF  
EAYNPLGVAVTTALFAVEGIVGSKDYRKPEWVSQMEEMQVALKAAKCSPLL NEMRDCRAALGETAKFSI  
QFAGNPIPDIQWYFNQVLRASEKYRMVVQE QEATLEIMKITSED CGYYNCKL INEIGMTMTRAKFDISS  
TSTIVEETKAKTTVKKKSGKKT MVKRS GASESQNVQKTEIRI IPTSAVETSMNVIKVKQPVSVLVEKSEI  
SEVLVVKDREVADAEEERSSQLIEEIEEEEEEIEEKVQHDEEDEVEVQVEQKETYTSSKKIEITKTVELIRT  
KISEKIITIEDVQVLSHHEEVQWLESIEAESFGQIGESALRDLATIGLLRYGCEHYEITYMYEQNIFI  
SLKKPESQSALVQLVEREGHEELISQILSESSNEDETLAATVGFKAFIRMIQTYEITIEIVIRK FVRED  
FISQDWKICGKERIVETSQIIESHEATHVKIETATTKVEKLFKKQE QEHVQNLEQQEQVKIQVQTKQIA  
QMNTKIKKHKHKHQEQEVSETTIQCEQKETLAHETS AELPQSETLEQIEESLSTYETLPIQNLSKDTLQ  
TVAVSVTTELSTPSPTASRVQEEILPQKVLAINEEVLPDEFGLRKESPRPKENKLTENIEVRLKHALNV  
SHAKTAESSKELPSKIPKSVKAQRKMKESRSLVVEAPNAEEAIEDLKPLKAVSQEVQSDILFSHEITEEQ  
HQALETIEKLPKPTSAIEDTVQKLLSQEELIIAEVLPSETVGRDVT DVRPPGETISPRLTPNMSLCITEC  
QPEDSIGEMQQAAKERMETPSMSVTESKAVGGQE LEVLENDHMLITQPTKGLADYTIKAE EEPVQVQE  
IITFD SLERETVAKTQTAKSNAELFELSEGLVSS TADSHSPTAEDLPIFEKDVKEATIDMQMQHHVTT  
ETVSNENAVKDLKAVDTPKMAEGLGSSALTIGETQQMNLVETTVELIEPNVESTKPAKGALTEAYGTA  
ESNEETLLESGLVPDDNRKIEQGVNI SEGEYVAKVQTTTVDTEGEFVSVAPKLVNPKFDFVEQSALQ  
IKQDTTVEKEEILSSNIELAPQLATSNMFP AELKVTSIYEVQPGLTSSDIITEQTKSVSANQVFETMSIG  
VTSKPDML ESTSHIDAFQHPFKTGD TILDENQQPLEVTNVQIT ESSTDIIDVLPNQLTKAETVDGFK  
YAEGLVVLPMESTIDKTEDTKPTAVNADISMHQFGTDVREQE PLESTLTRTEDLKPQTQTTESQFGLLQ  
SLETSSCVTLEGESVLSVKERHPEQSAAGTSSALQVANITRPQHMESLDRLEQKV PYYQANVNI GEIT  
LPNVEKIDSFDVLSDLNTPDYNKSSKGRVQLIESTTSLKTTTAVVSESTEELKDLNITQPVHIKPKPYES  
DQKISISEQTNVLEHVSSLPVLPAL ETIQSSIKSLHEINVRETDILEKEESLKDVDHISGRLAKIILDC  
TTGIAQVRQEETLEHEEDLKAPLIPL EKAIPASSELHRLPLTEYVQEQQGTSMDTDFKVS NKCASPNIDH  
LYETKSSEMIYVDSSINSVDSEFPAGIVPQKSLV PFRHTMVTENAVFNASENFEILSADQQIATNVQDSL  
SQSIIAEDQIAFETEQLGLETPTHPKLLKDDQNLHAKLVDEATVYEAMGQE QKVDKYNIQQAEITHD  
LPQVYATDLQQTFAEKEITTREQSYVAATTDIIPSRLGLAMTTKTHPVEGIDVLLSSPPKPSLAQTNYE  
ETQHEVRVRETQAI EEESEELTDGRLLPVS AVESIDSTFKVTSDSQQPPVFDKELSIPTVSPLEARAKPSL  
NLLQGTTTTFDVIPLESSVLLK DTHVAVQKAQQEYVAQVESNKVHVQMDNLMHKEDIFENAEIENFCKPI  
TEGTQLETVVIEVVPIDNVGGIHLAPQPSTLLATL TSTDIVNQSHVIDTQVPLEMESEAQAPLDNIAQAR  
IKSAEDHVHTNVSENVVEYEQTKAIQDQNKHGLFVKVSKNSDTSKAYLTTIQSTFLKEDILPKPNILQDTA  
QAAADELQSLVTEEVSVSSIQETYELKIPLQKTANLTQQTPQNSVNVCCQLAYEETPDIAFEPHALTRA  
TTSSVPTFLKPAENATVNIYENIEGHGDFKPGTVNLTSNSNLNSELVVSVVQEVT SVPSLGLATVEPQE  
LKAMPVTKSSTNLAYSEEVKGNKQEFTKIETVEEDDKQPETT VTVVEELPYEEEEKPEEIQELPEEVCVET  
VTEDGPKPKKKKIRTRVIKVKVGDKQEVTKIETVEEDDKQPETT VTVVEEVPYEEEEKPEEIQELPEEVRVVE  
TVTEDGPKPKKKKIRTRVIKVKVGDKQEVTKIETVEEDDKQPETT VTVVEEVPYEEEEKPEEIQELPEEVRV  
ETVTEGPKPKKKKIRTRFIKVKVGDKQEVTKIETVEEDDKQPETT VTVVEEVPYEEEEKPEEIQELPEEVRV  
VETVTEGPKPKKKKIRTRVIKVKVGDKQEVTKIETVEEDDKQPETT VTVVEEVPYEEEEKPEEIQELPEEVR  
VVETVTEGPKPKKKKIRTRVIKVKVGDKQEVTKIETVEEDDKQPETT VTVVEEVPYEEEEKPEEIQELPEEVR  
RVVETVTEGPKPKKKKIRTRVIKVKVGDKQEVTKIETVEEDDKQPETT VTVVEEVPYEEEEKPEEIQELPEE  
VRVETVTEGPKPKKKKIRTRVIKVKVGDKQEVTKIETA EEDDKQPETT VTVVEEVPYEEEEKPEEIQELPEE  
EVRVETVTEGPKPKKKKIRTRVIKVKVGDKQEVTKIETVEEDDKQPETT VTVVEEVPYEEEEKPEEIQELP



EEVRVETVTEDEGPKKKKIRTRV IKKVKGDKQEVTKIETVEEDDKQPETT VTVVEEVPYEEEEKPEEIQEL  
 PEEVRVETVTEDEGPKKKKIRTRV IKKVKGDKQEVTKIETVEEDDKQPETT VTVVEEVPYEEEEKPEEIQE  
 LPEEVRVETVTEDEGPKKKKIRTRV IKKVKGDKQEVTKIETVEENDKQPETT VTVVEEVPYEEEEKPEEIQ  
 ELPEEVRVETVTEDEGPKKKKIRTRV IKKVKGDKQEVTKIETVEEDDKQPKTT VTVVEEVPYEEEEKPEEIQ  
 QELPEEVRVETVTEDEGPKKKKIRTRV IKKVKGDNQEVTKIETVEEDDKQPETT VTVVEEVPYEEEEKPEE  
 IQELPEEVRVETVTEDEGPKKKKIRTRV IKKVKGDKQEVTKIETVEEDDKQPETT VTVVEEVPYEEEEKPE  
 EIQELPEEVRVETVTEDEGPKKKKIRTRV IKKVKGDMQEVTKIETVEEDDKQPETT VTVVEEVPYEEEEKP  
 EEIQELPEEVRVETVTEDEGPKKKKIRTRV IKKVKGDKQEVTKIETVEEDDKQPETT VTVVEEVPYEEEEK  
 PEEIQELPEEVRVETVTEDEGPKKKKIRTRV IKKVKGDKQEVTKIETVEEDDKQPETT VTVVEEVPYEE  
 KPEEIQELPEEVRVETVTEDEGPKKKKIRTRV IKKVKGDKQEVTKIETVEEDDKQPETT VTVVEEVPYEE  
 EKPEEIQELPEEVRVETVTEDEGPKKKKIRTRV IKKVKGDKQEVTKIETVEEDDKQPETT VTVVEEVPY  
 EEKPEEIQELPEEVRVETVTEDEGPKKKKIRTRV IKKVKGDKQEVTKIETVEEDDKQPETT VTVVEEVPY  
 EEEKPEEIQELPEEVRVETVTEDEGPKKKKIRTRV IKKVKGDKQEVTKIETVEEDDKQPETT VTVVEEVP  
 YEEEEKPEEIQELPEEVRVETVTEDEGPKKKKIRTRV IKKVKGDKQEVTKIETVEEDDKQPETT VTVVEE  
 VPYVEKPEEIQELPEEVRVETVTEDEGPKKKKIRTRV IKKVKGDKQEVTKIETVEEDDKQPETT VTVVE  
 EVPYEEEEKPEEIQELPEEVRVETVTEDEGPKKKKIRTRV IKKVKGDKQEVTKIETVEEDDKQPETT VTV  
 EEEVPYEEEEKPEEIQELPEEVRVETVTEDEGPKKKKIRTRV IKKVKGDKQEVTKIETVEEDDKQPETT V  
 VEEVPYEEEEKPEEIQELPEEVRVETVTEDEGPKKKKIRTRV IKKVKGDKQEVTKIETVEEDDKQPETT V  
 TVVEEVPYEEEEKPEEIQELPEEVRVETVTEDEGPKKKKIRTRV IKKVKGDKQEVTKIETVEEDDKQPETT  
 VTVVEEVPYEEEEKLEEIQELPEEVRVETVTEDEGPKKKKIRTRV IKKVKGDKQEVTTIETVEEDDKKAET  
 TVTVEETELSAPSVGKVLKRRVIVQKPEDAVTVFELPERKSVILSEKEDGTPTKTVIKTRI IKKI QGPN  
 MEVTKVQTVEEYKAPQTI VSVVEKFNTPPELPEERLSEVMLPDEVFESEAVDEEGRMKMIKTKKRI IR  
 KPALDNTEEVTEIGIEQDNVEPIYSVKI QERPLTESKPEDSKLIELPEHVTELVNLPDGKKRRRTVKS  
 RAFKSLDDDLDEVTTHIIEEEDKEPLTKVNIIEVPSDEISITPIIEELPEETVFTTELDENKPKPKK  
 TTKTRTFKRRGPDDEYFQIQTI DEEGKEPISLIRVSDENIADI IDISKLDDEKVLKHKQKPHKHKDQY  
 YKEYTITEPEEASADALQKPTKDKTPKQKKTLETPIEEVDETVI IDEGTGEQTDQIAIKRKRKRVQGNVQ  
 VEAVDEKPIEKKEKAKKKVVKTRDEMDDYIQFLIHQEI PKTVLQPYQRTEMLPQRARRDSSFKQPVK  
 LTPMKIEKVEFKPKMVEISSVVEFPQMLKLKAPKQRPQEEKKKNEASFKNKLSWIRFVYAPYCFP  
 YVTELETNREVGELSRNVDEAEVVKLRPKPKFKHSPKAELEEADLGAYESDHSKSNKELLHPKYKR  
 GKKEKIETPDSESKLKFQKGVQNEEASEEVNLPVKLDIAEIEDAEMPVRTQEEVVKKKPKKSSK  
 EEGLQFEPIEFEEEMERTSDIREESDTSVSDTSTQEKPIYKKKKVTSPQKNQYKILPGQPREFEETPE  
 DDLNLRKRQGERPDDDKADTKLKFYKFEVLDLEPEGVAETVPLSETIAKEPKKKRRIKVKTEQEDNTI  
 EIVPLSPEDNDEQIFEITVTSSEIPQGDAAKTIGKKVKRMNKQELDDFVTELQEEPQEVYETRMSDF  
 YEVKLTELPEMSDKPTKRILRHEKGDEVQVLEIVESVAPGEEPFEYEVINVISSANTEGDSEEITTDKI  
 KKSRIKIKDDLDAYIQQLINAEIPVTELEKYEKIDVDGKAKPKKLKAKTKKPI IDEGETLQVGVTEHE  
 PTKLTKTKPEEKNVIEKELAEHEAVPEYDEFLINKTESERPQEKRETEKDIPVIVDKVLADLNDCL  
 PFVVVEEDLKDMPLATDVIALEDEKIRKRVRAKDSKQYEIEI IETEKPGDIPDEARVIVITTEVSGD  
 TIDGPASTTEAPKSVRKKVKEKLEKFI VNIIEEAPLDHVSEIYEDVLRTPPFRESSEKEDIPSFTTTVV  
 EDEIVNPVLPKIKTVDDVRVPKDKKKIDNQKKIKISEFEPTPTSEDSTIEEYTPKLSHDEDLQDTEY  
 SVDVKDSLPSKSKKSTKQKQKESLPGPISLYTIRIEETTPEPITEKIYEDGKEVVRVINKRRIKKGAGPK  
 EYLIEVIETIEDNNPEADVIRT IETTPSIDSKPQEDHKIQVQVEKPKTESLDNYIQKLIDQEIPQVDH  
 KEFKATVLETSPESKAKKIKKHHKKTTEVIDGIPITVIEVTIQETETDDEDFKPEVTLKEIDHENAEE  
 APKVLKSKVSEKPKSKKEKSLEFKIAEEDKPKPVLEDISEDVQVVQIIEEDGTPKQVEIKKKKVSRRKHG

PKEQVFEITETKAIDEPLSEVTVVEITDEQPQEEVLP AQEKKP IKKQKKLKPEDVNTYVVKVLEELTEPT  
 QFETIPEDADDPQPVIEDISENVQVVQIIEEDGTPKQVEIKKKKVS PKHGPKEQVFEITETRPSDEPLA  
 EVTIVELTEEGLNKDIVIPQEKKT VKKPKLKPEDIQSYVIRVLEEFNEPQWPASTEKPIIEDIAESIEI  
 VPVTEEDGITKEVEVKKKVSRRKQGTKNQVFEIETKTSDEPLAEVTILELSGDKSQEVTILPKEKKPIK  
 KTIKLPEDVESYVVNVLEEFCEPQSFESPEPTGEAHEHTKTKTKPKPKPIVKAPENVILIEEMAPETVI  
 ENIVNEIGEEVQVKTTKLLKKKEGPKYELIEIKETYEENKPEGDIEITTEL VPEGSPDASDDQPVIVV  
 QKIKKKKPKVDDLDKYIQQLEQEITKTPL EYEPTEMDSKKKPKKVKSHNKTIEVIDGLPVTIHEFN  
 VEDIVSEPDMETPKTLLDEIKEIPQLPDDSSKYL VNISDEFGEADKPIKQPTQDQPIKKEKPLKKKKDV  
 EYPVSL EAFDHTVKKVSEPTLEGTVKEVTVKKRVSRRKSGSKDHIFEITETTSED RPTAEVTVVLESSDE  
 VL DSEKPKHERKIVKPKQLKKDDVEEYIINIIEEFIQPIPVGLVEDEVEKVKKEETKKPKKSPIITYIA  
 TEQEDNNDNYDALVKEDLDQPIERALEKPSPLEYTSVVEEDSVGEEQKQPKPKKISKPKSIKQPSVDKS  
 PDYLVNVI SEESI IDEPIPEDYVVTEAAEEKPSEEP TFKVEELETEAVEKEVTDDDKGETTKQSVTKRKI  
 KKL VGPKEEIEIEIVETKTGDTPEYEVIVTTEEVQEK SKEAPEEKKAKTVRKAKKIPKDDLQDYIQK LIEQ  
 DIPKTELEKYEKIDLDEPVKMKRKP IKKVKQSEEQPK EETEEP IEDKPV EKISEYSEVDSDEPKLTVAVK  
 EFIP EKPPEKPF EIVVLEETVESKREPDEEGK VREKVVTKKIKQNRGSVEVVHDIVEEIDTDTNESVIT  
 VTTTVP TETPDQDQPSVKQRKTKIKKDEVEDFVKRVI EEEAPQPEGSVDL VVIEDFV PKPSSEKRRKKP  
 IKDKHTSV EETPHEDEVLLIESVPEDSPLSDDLITVVD SVP IEEEPENKVNQIEDTKKPEKKKPKPSA  
 KILEENVPEDTVEKPLEALHTSDLEKPDVQEF SISIKEEEQKHTHPEKKKSSKISSEQPKQ PSTEQYEI  
 SVTEHDLKPEEEKPFTVQVIQSETNVEETKDDTGK VHKQVTKRMLRRPAGEGEIEIEIVVRDDQPEAEI  
 TIVEYEP EPNQDEKPKPEKKTTRKVKKDDIHDYIQK LIELETPKTELEKYEKIEFEP IVKDKPLDSPID  
 VLDES PKVEQK KDKSRSTKVPNEETPVQE QYAKVNVVEEAEPEQPEIPVQILEVKPVEVDVKEVITEDG  
 KPVQEKTTKRVLK KIGPEEQTFKITMIESEDNDSVTIVDEEPEIASPQSIEEHPEQSKEKLAPKPKKT  
 VRKVKKDDLSDYVKKLIEEIPKVDLEKYEKVEMPEKPVKLVSDSIP EEPKPKDSQPI SVLPD TTKPKK  
 TKTPKTPKTEDTDQQVPDEPTETTVD TTDIPELTP TQTAQPEDTATAQITPSAQE EKSTQDDTKDTIQKT  
 VKHKKTKPDTQKSVETSELPEVHKDYQIS I IHEELVEEQPEKILEVRVIDEVAEVEESQPIVEEVEDEE  
 PQA TEETVEDVTKPKSKKKKVVKKKTDHDEL IKKMLEQEIEKTELEKYEKIEFDVPK LKPEFAALEP  
 IKIERKEQKPTKVTILDATDVPKTVK LKPSKRKEKPAEELTVQLPKFRLKARMLVEYPPAPLIPKTTDI  
 GAIKDNGELSRNIEEAEELKFKPHKTKKIKKIKDDLEKVELEKYEKYISSEEEPEEKT PYKKPEKAPK  
 EEKQEDVKLKLK GKKKKPK EEEAPENVTLKNIPQKQPEVEEVELKQKPKVEIVEEQTKPKDG E FVVE  
 PFEPSEFDRPEYVPDELEQIEHPEIPEKVKKPSKTKYKPKDKSKSEPETIVSEIVAGVPKEEEAIP EQDV  
 KFRKPERDAPEETDSEIKLRPVPQASKDENPDEQALVTPKAE EPIPQIEDK AIDDEKKPKSKPKKVP  
 KEQEIAKEEPEEFVSVKEEALVDPKIEIEKPKDVVKEKKPK EAPVSEVVVIEE EPKPEEVPEEIPVE  
 YKITT VLEPEDAPKEHQVKVIDFDERQETTEEVIEEKV VTRKKKPKQPEEF EFTLKEPKEEQIQPDV  
 VSAEISLPIEPEQKPEQYVELKITQTTPEEPNDVQI AVKEKVKTKPVKKVKEDKIVVVEAE EKKQVVE  
 ETIVEVEKQEEKKSEKPKSYEFKIS ETSIEEKP IEVAEEAPEETPKVVEKKVAEKFDSYEFTLKETDE  
 EKVITVDDQPEEEAPVEVVFKKPKPEPEAVEAEFVMTEPKIVEETS VETAIKQKTKKPKKDEEEAQLAI  
 KVVSEAPVAEEVFSEAPESKIV EEEVIAEEKPK EFTIRVSESEPKPEEPSVEQFTVKKR KPSVTFAD E P  
 ATEIVIKESKPAE VVTEDAH IKT KKKKVT DVAEELKIKIT EEPVQEIPILEEVSEEEVITETKKTAP  
 VVEEKTYKIGIKETEPEKPAE AIVEEEEPVVTEPIEEAPKPEVFEEHKVRVIEETPRELVEEVIEEEVKV  
 IRRKKPKPEIKEEPEAEVTVSTPKPV EEEATSSIAV IPEQPT EEEAADLKITIIEEETPPQELVQEIEE  
 IEI VEEPKAPEEQPTDFTFATK DSEKKTPEELPEEQVTIQK KKKKAPVPEVVEEPAEFLVKPKTPVQE  
 VTEEAKITKSKPKVEE EAAELKVTITEEIPTEPEVQEIEEIEEIEEEKPAEYVIEVKESQPEAVEDK  
 EVSLPKKPKAPIVEEPEAEITLKPVKVSEEVQEEAKIVKKKPKKIDEVAVADELTVKVEEEVVP EPIVE  
 EEVIEEFEIKKKPKPEPEPEDI VDA AIVK LKPEPVD ADEVVAEVT LKPKAKTEVTEEF SVDVKLPKEKK

ERPVEIEEEEIEEEAVVIRKKPKKPFEPTEVEDLEETEFSLSFKKPHTINEGVEEAATVLKKRPVKPTLTD  
 EAAAELSIKRQEEYEEGEDIEEFVVSQQRKPKPLQITEEDEEAYTVKKLKKRQVDIPEYADVENTFR  
 ARSTKTKEVDQEFNIALDSYAEIEISMSGVKLKKPKIKKTFSEAADEAKIKI IQDFDDGEEPIIEEIRD  
 DEDTIDEVEEPEEYFVEELPPDEVDFKLPKPKHPKPAYSVQDEEEQFLIGIRHPKRDSVTYDEDSLTFK  
 KKRKVVQQLFNEDGASLNTREMNVEESENLMYISICNYIADNNEAINLVEGEKVTVVGRHSSEWWWVK  
 KSTTEEEGWVPAQYLMEPEEYQYVQNKLHEKIDKLPVFERPGPEDKPIAPRFIEKLQPIHTPDGYTVQF  
 ECKVEGNRPQIAWFRETAI IKPSQDFQMFYDDDNVATLI IREVPEDAGQFTVAKNAAGFTSSTTELI  
 VESPLSDHGSDATASRRSMSRESSLADILEGIPPTFSKKPKAQYVDENTNVILECRLVAVPEPDIWTF  
 NGEDIDEEIEKNVRI VTESDMHMYCSVVIHISKVKSQEGTYEVIATNREGEARLPITLKVRTTDEAPQI  
 LEPLRMVIREGESVVLSTQIVGNPPPKVTWYKDGKPKVNAKSDKDLHTLTLITPQKSEKGEYTVKAVNP  
 LGSVETTANLTIEEPAGGNAEPLFVERFEEQNPQKGEIRLPAKVS GNPVPEVQWLFNNTPLFPSERIQ  
 QVYDGENIELIKDANPETDSGDYKCIASNP IGTKSHGARVIVEVDEVTFTKLKKTTITIEEVQSLTEC  
 ETSHVVTTKWFFNGKELSGMDHRVVVEDGKTHKLVIRNTNLRDSGTYTCKVKKQETQSTVEVLQRKPDFI  
 KVLDEYEVTEKDTAILDVELTTEATEVTWYKGEKITPENKNVEFIKDGKARRLVIRDVTIHDEGQYTC  
 IEGQECSELVVIELPPEIVEPLNDVAVTGENAVFEVELSKGDALVKWFKNGKEIVFNERIQLAIDGKK  
 QSLRIVKAKPEDVGEYSVQVGEQTSKAKLTVEEPLVDFVIRLPDITLATKTTDAEFTVQLSQPDVEVTC  
 KKGKPIKPNQKHEVFVEGTVRRLV IHDASDEDAGEISCAENVTSSTKLVEELKLPVITSDKDQTIKV  
 KENDDVTFTVKYTGVPTEACWTRKVVIPKSKRTIPTIDEQSAKLTIKKVDDDEGEYTVKLVNPVGEA  
 EASLHLVIMRKPTAPGTPQPLEIMHDSITLYWKAPEDDGKSEIEYILEYQDVKEEKWTEIRKIKDTTYT  
 ISKLIKIDTEYVFRSIAVNEVGPSPSPSPLSPPIRLVPKVETKAPSVQEPLQDVVSELKVEVTLSCVFGGIP  
 EPKVTWKKNGQVFESRSIRYENRVAKYTIKTTIETEATYCVATNEKGSAAETSCRLKLQKPVLEVEDK  
 YLTQKLRTGSILTIPATVRGYPQPTVTHKETIEQKTTKSVTIETTETSTYTVKVTREQSGKYKVAT  
 NESGTTYVECTVQVIDKPSRPQSLEIKDIKDSIVLEWTPPVDDGGLDIEKYTLEKCDVQNNVWKMVSDF  
 NKDIKSYAVQKLSMNAQYMFVVAANPIGESEPTESDPVTITKKFEKPSPPRGPTTVSGMNDTSFNLAWE  
 PSETDGGSKIIEYIVEIREETETTYRSVGLTGTVNIHVEKVVNRKGYFFRIYARNEVGTSEAFETEK  
 IVLGRKITPPSPPQNLRAPDVTSRSVTLDWVPPARNGGSEITGYCVEKRSSTSTNWTKVI TLDAHQLHYT  
 IDNLKEKCEYVFRVSAENEVGLGAPAVTESISLKHASEFILVVRNCGSYTEFGFLKAVPSPTGPLEAR  
 VLAANAHI FEWGLPESDGGAPLLGYHIAIRDMKMTWIEVGRVPAGVLKQFQIRDQENHEYMIRIFAKNE  
 IGLSEPLESEEPYKAMTAGHESLPDEPRTEMSSCNTSSWLRDHHMDADIHSYARGRLQRDEYFFRLWAE  
 LPKSKKKKSSK

>E4YII7\_OIKDI

MKFLLLFLIKNCSSRVLTVFCSNYSWNCEDIATIFRGFPKYELIQEQKRCDNVEILSTGIRRFNKILPP  
 RTVLNETFEYKEEMSFAGFSCPKGSETLLAQAHSWFDNRNRPITVADERTGLPVVTVGHRLDNSYSNV  
 ISLGPSYKIAKSMWSMKTYFNWNRIIMIILPLKPDNSPPYSSTESYDTGRRMLYIENYFNEQLEGTAKH  
 IISALVKGLTTFSPGSYSSEEEWSVLQSLIEDIESFDVIFAPPNVFRDIVDKEHQKFEDSTMNWFIKELL  
 KKTWILLNEYNLEDQLAPQGFLSYFDVYQEMIKKLLLPQPLEKYGYLSKQKDSRTIGIETPKSPILRGY  
 IAAVDYFIRICLDYDQIPLNGSKVIREMTEYIKDPI SGRPTFTTRFSEQIELDKNNYQIGHFSLSYFDR  
 NLKSWKQIRVDHGDQLYRVCNTDVCKIYLQRLNHTDPTYQPENENEFFTEQIILLALGGLVGLVGVIF  
 MITKSGFLFMDFLYDRQLIKLEWEIPASRILMIRDANEMASGNSFRSSTSRSTRRGRSFRNLIEGVKIPS  
 RRFCELVGNLKI EKSGQRKILVGLLPLESKLLASRDSLQSIRRVIQIEGPNIAKFEGIFNSRSKSYRV  
 IHYCNRGLNHFLSSNYANLELTLEVKLVAIDILCGLAHLESVLGFHGFSSKSCLLDACFRVKISNF  
 DHLRPSKKTQRDIYKAPEVLRFDVSKDTPNVLRRCDVYSFAIVFQELIYRRGPFYIGDESYSSEEQKIEQ  
 VRAVQSDIFRPTLEKPADLSNEQWLTLEIALIEACWSEDAYKRPWFVRDILPHFQFSHSSRFQKSKSI

IDSFVGLLETYAENTERLVRETKILERF

>E4YIJ5\_OIKDI

MRFLALLVSSFALEKCVPEMENGWDIITISRAKGGIGLTALGATHVKFNGETKKTPLRITHGNSRQE  
LKHNRPLMRSFWEALFSDPQTATISLEIDPTYNHFFSVQKMKTMFKTNEKLCYKAGFSLFSFWRVAPLVV  
GLAIFFKARSVTDQVAFHYAGGISAGVVLFAIGLLFIVTKMMIPKRGMISFWGVFLGGSTFISYFMSKFY  
AQAYELIEMYPLAVMIYVVVAASLSFTACYYEYEDSVLRHPKWQNFVCWALQLFGLLLIGISSWNIKLNIF  
IALCVLAKELLKYSRRHGTFTAACKVSYKTSPIHVKSRNLNTHFSPTPSTPKFNSLTPKTPQTPNPFSPIA  
GLRRLPMRLGFMRNNEQNSTPEKKFLTKEEYEEQGERETKHAITLTKTSIENSPNPWKELSKLSKDTQSK  
LITFMNTGDHLEKDSDELFNLDSEDESGSQDFAEENGEQNSFLKPTYSSLNKSQNSPKRPASVYHRQS  
NGSQQQPPERHQTFNNTSRIPQKRWR

>E4YIJ6\_OIKDI

MREKPPQKTEKIKEISSEPTKVFDDCSEESSDTIEWSAFTPKKMSKAEEYEEQGV IETNKAMEELRKIE  
NSQNPVKTFMFKGGETRAKLLDFINSGEHFSVEVNKNIPESQNFVEEKEKVDQASPLKRKIDKLLKGGQIY  
ESPKRYPFSFIHPSYIRTGEAALKRR

>E4YIK1\_OIKDI

MKGAGHRPGQWKQKQKKNHNTGAHRSGAIRKSVSGAVSSSGSMHSGKSSKASSKMARKASALSFRHKKEE  
TSRVAYRPIHLIFFPLGDDTNAMEITHANLQCSGACEQTVGGSYQLALDRKKNITRPNDISSLLVQSQV  
CDALVLTMRYSDDFLRENKLEMLAHGVGLPQVFLAIQGLSEIPAAKVMAARNEVSKRFKDLNVI PCDK  
MKTFPVDTIDQTKSLLRQIATVRQTARGHINRPFMLAEKIAVDGDDLKISGYLSRGLSVNLP IHVPGVGD  
FLIKQVEDKHGEVIKSSKEDKLPNLNPEAEVDMLDAEQTFPTEDELKDAENPQSQTVKRKPVGYSAYQA  
AWIPDDSESGNEDDIIGDDREYFEDEDKVI AEMDSGMGVDSKEEEEDEEDKDGSKYDKNYDYDQEQQ  
FLSLHRKAKDDRAFPDEIDTPQDARTRLQKYRGLTSFRTPWDKNENLPADYARVFKFRWAHAKIRAKK  
WVPEIAETVAAGQMVTLVLKIREENKAALRAIGDMDSLVIFGLLANEHKMSVMHFVVMKRANGFDAEIANK  
SELYFTCGFRFRKARPIFSQHTNGNKHMERFLPIDKTRIVMSCYAPIMPPPQGLAFKDSGNGFLAA  
TGSILSSDPDRINLKRIVLSGAPFKINKKSCVCRFLFFNRLDIHWFKPLELRSKYGRRGHIKEPVGTHGH  
FKAIFDQHLTSMDTVLMTLYKRVYPKWYESVPKLDGELLV

>E4YIK3\_OIKDI

MSSDSELEEIMVPAKKKIKQKIPPEELRDWIEPVLWKFNKTCKMSEHRVDRKPLLLRNRYRDLEDGYIVAI  
MIKEYCPKVQTHNLTRTLKRVSKIDNWAQVSRQLWIKTGFNLDTRKIDKILDHEPSVLFVLLDLKHFL  
EENYAKDEEGSDKSSEVAYVDVEKYIPAVLDSPKAKKPLSKVNVKVLNKAAGALHRNDTIFKNNRKC  
ELRARFKSLQSDVQERNSEIIMLESSARPASSINASESSKKKSGCCCVIS

>E4YIK7\_OIKDI

MQSNLTAKGILITGIIGAIVGVVAWKFRQNSENEDDSRVEIISIDETPIDLEIETEPEDEEEESDFYDD  
EEDKDEEIRSAIGSIFNLLEQMLQFRKIPEVVQLLQDILFRTNDSACL IHIKQSRASLILKCSHENEK  
VRMLAVRIIQNISSCKTGQDSAKFLVPKLVDIANAFLINSTESDVMLKSLTDCIANFSANYKPDQASYM  
SFFQTASSCDLSDDDDFGSSLMKIVVNLSDQKLGQDLLLKEPELDTMVRVERMIEEKQGGTRVQARLI  
AVKNMISETDWQLRRQESLDIILEYSNSRLADKELVERSSQILFNLEDKSEPQEN

>E4YIL1\_OIKDI

MKEITFALQKSKLQNLPKIGEIQFGNQALNSIGKETFKDIPSLTKLSFQSTHVGELRPDTFLGLENLVS  
 DFRSSKLQKIHEGAFAGLFNLEQIALTANGINELPEIMFEDSSNLKILLMDSNKIESFENTTFSGLFQLE  
 RLELQNNLKFPEFGFKDFEKVTKLKLNNLKHQISENDLIGLESLEDLTINDNELNFVHENAFASLKK  
 LKFLEMNNKIQVIEPNWFLNIIPRSTQAAQFGLNDNIWNCGCNSTRFRLWYELDENKDLFTTLTKIEHM  
 NCSSPEYMKNFINGLDLTFPKSEDDPCEPPRIWGHPNLSIKRKSEAQLICGKEGKPKPKYFWKRPD  
 NSTVWNTSTLTIEAISDADRGVYECKALNIAGESIEKHSVEVTWEDAITDELGNYIGIRGTNSAQSQFL  
 CSFFFYLFIIILFFH

>E4YIL8\_OIKDI

MVQNLMKDVENTFDSHFEINPNPWIAGCEKNEKENDPKIIRPPKPSQSIKLLSTAKNIIPRSAPDLPNIS  
 NSDRVVQCSKMPFSENMRKQPEIEFMTMQNDDFSDSKYAKWLKKQICNPESVENLQTRPVHLKSIVSES  
 NMPRDAEEQRLSNLKNLLNESLYRLLKYPADYNSILTCLMDTIVIGSKGFGDQFMVVAETIYSTCICEI  
 PFCHIASKLVAEICLIKDETEKGFRTILLMMLQIEYKKKDEFKSMESDRERLQTLTMFIAELLVNF  
 LIPMDNGKPSRIQIFSKLLPSLLTTLMTNTPSQSNVRIASQVLRGVPPIIEIEQNNQAALSEVWHLLSNL  
 ARKGNEHAKKVLHHRATGWKSYFPRREENKNVRELSYEGRGEVFFFTNVGIPYMVSSLADPKVLKELF  
 Y

>E4YIL9\_OIKDI

MLFSLRLLTLFLVLGICQRSPADYPIFKNIDGEWTISLGRILAQIRKQVDDPSDIMIYG

>E4YIM2\_OIKDI

MSGLVSHLSTSIGQDVVPGCVAIAKFNPEEPKQIAVACRGGKVCVYNLSELAARTTTYKPVTVIDVKD  
 EVISIAAAPWKTATQKYQLLLIASSTIQLYDIYENHSLFHRILPDEIRTSIGCVAEKTESWILTGGES  
 SITGFDKGTSEVYWNVSSDAVNAICFVDLIGKNYDQIVVGTDDQEIITYDHEELIDTRTEVSQIALLTRV  
 GADQMAYALQNGTIGVYQRLNRLWRVKSSTATCQCFYKPNKSLLTGWESGRWEMRMESGEIYKSKQIE  
 CSVAKVVAHSFSTAGDILLVFGKNGSIEVFLPPTIDKRRKAVDENEALRKHRRQILKKELDHVEMA  
 QKMTVVSERIEQNVIPRNVKLSVISNSNDGLFVSVSDSLKIFLLVFLSEGLFGNEEAKTEVFPAGKQ  
 ELRVHIAEAVSTVTALGKAGVGYSGKTLHVLEEMIEIPIFAHVFLNDVGQMPGKVEFPFSERPQRFF  
 LWLKENFLLADKRQLSSNNAMCFKSPSGEKVCFHLAGDKLLIYADTVKWASDAVQSLASYFGINDMSSI  
 CDFPEIKEIEGLFQEIADIQASLVRIDSDIAEITQGLMSSLVRLEDSRLLLEDWKSMEQVQSMIMNADSDL  
 MLKQRVRHANRDNLTKILKLNHYIDSGSKLRIGKEPVKILNVCRQAVKTKKPKVIVRTLLHGAN

>E4YIM9\_OIKDI

MLLFFEFFALFNCREPNPEERLHFDLEEYKDVSPLLVLPKNTSIDSKEYREEVCAEWIPKILENFDEN  
 VDAENALSHIFYCVDVAVDGFDELEACDEWLDYIHFKNLRSTSYKKGCEVHDEHYLERKQSASLGKVA  
 MHDASANEIVILNDIINRPLYDHVIDVDLYIELDTINEIDLRLDALMDMYADWYDSRLEWNKTEYSGVMY  
 TVFDTSKIWTPPIEVNMLKMINPKLESLECEVHHDGTVEI IKMRALVSCNVDQNLYPFDTQECGLNFAT  
 PSMADYKLYFHLKWNMLNGLNSASIANEYEVHLSVLKGSFYKNEQWDLGKYYESGTVVGHKRSY  
 SLVRVYFLLERHTIYEVTLFIPVCINLLVCLGLWMPISCGEAGFQVTLALLILYLDLISTTTPVFD  
 SIGKSPRLILFLITIASVVAHIITFSMWKQSCDDTLRNLSPFKCKFTQKTAKVLEWLTREKYEIPK  
 AIQLI IDDAENIEKLEEEELKAWKGYKMSRKRFRNYLFFRVIKILQLFLNRKKSFLGFLVNFRRHFLH  
 FCDHS

>E4YIN2\_OIKDI

MVENSLKTERRDEEEQEKNPFLKLNLSINGATNSLANVLPVDQTPPTKI IKLASELFPAESNNTVNTV  
 TAAKSEVNSSQPNPFDKSFKQSTSQSPENGISGNEPVIQELDNVDESIDEHDDGDHEFVEEIVDEEEIEE  
 ASEKFKVG

>E4YIP1\_OIKDI

MVTAFADYTSAPFYPGDAPEVLKKFLSICAIMFIMIVNGLSVKASERMQIIFTVVKLVLSAIIIGGFV  
 EIAKNTENFENAFEGTNPSISAWAVAIYNGMWSYDGNQNLNFVSQELINPERNFPLVIIGGIPLVTLLY  
 LLVNVSYFTVMSPSELLQSPAVATTFGAKVFGSFAWIVPVGVACSTFGSSNGEAFTSARLVYAAGNGHF  
 PRFLAYLSNERLTPLMAVVFNAIIGILMVLPESSNIENLLDYFSFAMWTIYALTFISIIIVFRYRKPYPDV  
 ERKFKIWLPLPILAAAIISLYLVIAPLIEEPSLAYLLATCIIFGGLIFYIPFVYLDWNLPGIYNKVEIFC  
 QKYFEVVPVSAEELKTE

>E4YIP7\_OIKDI

MKLGSLWCPIVASKLSPFLDDIHYEIKWVGEQVNFGEELGYKVEEEDFVVMKTANQEYKCFPSDESVS  
 EEKSNEETGESAEITLLAPLFKETAKKDCSLRIETYWSYELCHGQHIRQFHEEKVKGSVKSTEYYLGRKE  
 NPLNPANAANKRAEVSKKKLDGLPTPYHSISMGDGTEDCIHTGKRRKTDVRYICNPAMKPEIMSI TETT  
 TCEYEILVLTNLLCSSPLYSLHLDTETFGIPCQKIGDSPTVPKGYVKPIEPLSIEGMLDLLKDGVDLKL  
 GAAFFKFDAETGALQPLSEDELGDFLEANQVGFIFVILVFRSEIVQTI IKHAQEMGVNVNEIQIDG  
 LDQKNTAKEIKKKLSEHTRSQINAKMPSQKVQEAQKQLSAETEKILNDFLAGDFCLRGGQGWKYEFC  
 YGKHVKQYHEFQKEQKPKPEPTKEIIVGKWDESIHLEWAKNRQNVKHSKEIVKTGQVKAGKTIHGDDGF  
 PISVWVSEDKVDEVQTIIDGDVQEVLEWYNGEVCDITKKPREVLVRLKCKPNQDALSLYLLEPKTCSYIL  
 VLESKLLCSILKNADENGLLSLK

>E4YIP8\_OIKDI

MRTGLSSYGLIFQALQCINPCQPDCKNRLVQQGCDRPLRVKYFGSEKGHGLVAENEIHKGEFII EYMG  
 EYLNLEAVNERQVYQRENDKMNYILSLAEVFGNGEKEIVHIDAGKLGNAARFANHSCSPNSKLYPVRVEN  
 DIARIAIFAERFIEPGEEITYDYGSAESTLSERKCQCGSRCCRHFMPDINL

>E4YIP9\_OIKDI

MNEEQMKASVLLDLEQTGRLEQLRAKVRYEVYQSLAKEKVVAKKELSNREVLTVSIIISDWLDKHGFTVTA  
 AQLNSETQMTGNPLPKTVVKSELRIDPSDSRAILDSLIDNHLGALPLQQNKNKRPSLDPQHIKCSQES  
 DMIVFKK

>E4YIQ4\_OIKDI

MDWLNEQQEKND SIPDTPSSPESVAALVIDESAHSIISSPESVSSSSSETTRRKNRQKSPSNGLQFPRPI  
 MRDHRIRRRRTSEQNHNQKKEKLTDPSSRRSKF

>E4YIQ7\_OIKDI

MLFFLLFLRLNGATDRPDTIWLPEAETLFDSNFVHDLEQIKNLEAKHEFELPLEVSANKNDFWILHNDY  
 ITIYNKANQVYMTGKGLRWNSFERVLRSKVVDPRSKTKNSGIQPLFLAELASSKLTTHVRSSNNFMP  
 LSTNAHREFLYKVFVPSIEDENIKFAFIPTYRRDKVVSIRYLFNQSNEISFGFDLDVTEIEENSSLADIL  
 NRINDVEFDRNQAFSATDDLKSIINMFRKRRSTNRKRSFAFANDASIFLCKNMNGQVFPVWDRCGEAPS  
 SKTYQQNTAPESVQCWDDGCLDRQDCCTDFTSCKGEQSFQNSECIAEKNFECSDSSFEGTTILISTDG  
 FRESYLSERKEFLPTYMKFRECCGSFPEFMEPSYPSKTFPNHHTLMTGLYPGQHGIVANKWYDWKCDASCN

VFSANTGEHPCNVSSPEEGWWSGDPFWNTVERHDMISASCLWAGNDLT INGEQPTYFWDYGTYGEEFPGY  
 RIYQMLKWLNLPPYPGSGPKEGFRPKFLTLYFDEPDHIGHAFGPYDASGELDAALKRVDFLQQLMDGLK  
 LYNLEKCVNIVLTTDHGMEQALCEDMVAIAPVFDAANPEIMKTTNFLT KTTTAQMGGLMGSNKSDFSVM  
 EVIDTVKCTWHGNSFKVWDKYFAPKRLHYDNASPAIEVLLFYMKRDTKI IDYPWDCSDEGYMGNHGWD  
 KYGGMKVPLTLYGPKIRPNVVLPIQNEVEFRLLMDLLGIKSNSPKLMQQFYKQFSLDGRFEPALKRPT  
 NPGKQPDFSGDVSFPTGVTFNKSSSEIAFDVNHKFATYAKCIELDECIQKLGFEENPMLEFFDDPFWWH  
 TLKDDMLPRIFTNNVKSRLRFGAAFDTTGTGVVVPPTQWMSRTENKWCNRQGVYQPSHMYF ILEDEEGSLY  
 PALYPWRHNTSASFESSEYSPCIVINEEETRQLYFGNFCRLTFFIPFVEWWQEKLEIHSVRLLEIERMTG  
 MEFLGEEDRVRVALRSTMNVEGDLWAFKEPSSSSVAALCSFLSFSFLQLI IN

>E4YIQ8\_OIKDI

MSRRIIANIKQNPIIKIEHFHVANSVVISLKDNTNFFLAKTGGDDGDQDQFTTLTPLTTTSTADQTKLP  
 SIQTISSSRVAGSFSIVNCPVESYEVPKINGMGHALPPLSGTMVVP IETKTQTIPVVS DINVTNGSQPM  
 TITTVNGNWNYSVLERDCGVVNIINTTAFHGVPDNAVLEVVPSA IETSSEMKNDSLGNLIDQAEES  
 THLSVMGNIKTEYRLEPARSSPARIAPVSRTQSESTHEMHIPI IQAHQVETECEYDIFKASPDLKMTDV  
 QEKKTRNSKVSDAPVEGIEEINTKVVAQQITAE LKRYSHIPQAIFAQRVLCRSQGTLSDLLRNPKPWSK  
 SGRETFRMQSWLREPEFQRMSSRLAACRRKEDERQNSTTKKPRVFTDHQRRTLHQIFKENKRPSK  
 EIQITISAQLGLELSTVSNFFMNARRRSSDKWLDKVVLSNKKIMNFVDDYTPYD

>E4YH58\_OIKDI

MSGIFELTELKDRI I IAGGGLVGGVAAAMLADKGHQIDL YELRDDPRNENAAAGRSINLSLHRGMRSR  
 QIGMEEELANGVKMPARMIHKVSGETYEVYPYGRTK EHFILSISRLRLNQMILTAAEKRENNLHFNHRI  
 TDVDSLGT LKFSKPDASGDVLI GADGAYSKVRSKMARGVDFSQTYIPHGKELVMDKAENGDWRPKN  
 YLHIWPRGQFMMIALPNLDGSFTCTFLFPFEMFKT IETQETG IAFMEEHFPDSISIFGRDNLKQFGPGT  
 TPGLPMISVKTSPHSVDNTVIVGDAAHAI VPFYGGQGMNAGMEDI AVLMDTYAKHNDLKSTIKEYGVFRPK  
 DAHA IADLAMYNIEMRDLVTSNWFLFRSLDRLLATFLPGSVIPLYEMVFRPQMGSNAIERNNKQST  
 MIDWTLAAAATASLAFALKKLTREGNLSSLQFDKLSIGSAQDFVSSLLK

>E4YIQ9\_OIKDI

MTESDRPKPIGKAFIENSKEQSFLDQKISFVFRGKLSQHSTHDLDRQSIQIAAALIKNGIVNMDVALVGG  
 FTITSTSLALALMMSNRNLIILDSAEADRF SFIERINAEAFIDESSLRSDVTLNHGVKDIYSFESSEF  
 KIVTDKKITKLELSESNEAKDSVEKFIDENISFNEIGFYTTTSGSTGVPKI IKMRNSTFYAKLKWATNP  
 AGPQDLPLKAAKFGPDLPNVMGHINNI AAFANFVGHIVVVFVFSILSEPEARKNILFCDQKDLKNSLAAAA  
 VCKSGSLWAYVPKMLEIVESKEFKEIKLPTVSLFLAGGAKITKEHIRRVRSNFAASQDGRKCHVLKLYGS  
 TEMGSFLFRTGLETDEI IESTDGFICSNEGYAEVRDKDGKVLPAGEKGFVFKSPDLMMGYIGFPDQG  
 EWYEMGDEAYLTDDNHVVVLGRLKEQITFVNTKKSNSVELEDRMYKAGDFVKSIVLAKRNENAFDDIYY  
 IVYCEADDEKILKHVEDDVLTKERP KIVFVREPFKMLANGKFDKKS LAAKYLE

>E4YIR1\_OIKDI

MNGVDVSVAQDSGILKAVLSEGVGTATPSFGSEVTVHYTGSLNDGSQFDSSRGRGVFKFTLGQQV IKGW  
 DEGKSMKKGEISVFTLRPEYAYGDAGSPPKIPANATLTFDIELISWKAEDISENSDGSILRTFVKKGKE  
 SWGNVVDCAEATVKCRIVKSSLEVVHDFGKINFRVGEAELVNLVPGIDFAVKKMNRGDVARLTLGSKAD  
 LKAECKALGLQEFGEYEYELVEFEKVQEAWEMDDQTKIEQAELSKSGTERLKDQKYDLSIKHYNRV  
 ISLLDHQETKENNEKFEEISSKFKSLKLA AFLNLSLVYPKIAENYKAI SAADDAIKIDPENEAFFRRGT

ARMAGNDLEAAISDFKVVVEVNKENKTAAKNMKICSERRKKQKEEEKKYAGKLFG

>E4YIR8\_OIKDI

MQQNNKCTVGERFWPRNLYAGVSWPKFTPSTRKTI EFSLRGSKVYRDEPSVERTLV DYASQRMKLWNDLI  
PKMMQPLKKA KINFPSSSFIPEPTDETATIADDLKNMNNITIQSFEDKQKEEAKEVGI GLEISVTL SIG  
LMLFIINAF AFLQMAIKKQREKKNFRVKIEDQIKERLIK NKQNSIPNRVNKLTLGNDLRRS QLSSEGHK  
NYLSRKMSLERSQSPRKDSTGR

>E4YIR9\_OIKDI

MFSDFGWTSNAMRTAELHSGLN YDTFVYLFDRMGSETYRPELDRAGTNQAI AFLFGIPFYGKSTIGTI  
FDSILWSPEEKTLSCSM TTYFANFINYG

>E4YIT1\_OIKDI

MILSDGLSGAAVKL TLLGISLFAFYIRTFGV RKFEPVLNGSEGYRILR KLEILENGD LDFDEQ TWYPFG  
FLDDDKDLV LIRLIQAFR FITGVLWKT L TSHDACVYFGPFCGAVTPWISFFVVRSLVRETLPAICASFYV  
AVLPGFAFSTVAGRLSSEALLPAI IFVFLHL TNKAMSQGCKLKVAMLSL FYYVSSSLWSDYFLLMNFVAV  
SLFCKLFHGGYDCAIYTAYSSFYGLSTCL TLYKSNFLASEQF IPLFAFVYLQYYALSIRIGDKEEIQ RPL  
QASFTSMLLLLFYMKYTEI IAPLKEENAIYLNPSLQKTS LAVLTSSQSAQPSAWAALFFDNHYGPM LLPV  
GLSILSKKFPKVTNITVYSVIALYLA AVKTSNQILLVPALSITSSIAISQI IEVCLELLKSTEPPTGPT  
KRQSQKYETEKNNLPMKRFFAGAGT LCAAHLIYAARHG VVWTKNIYSDTTIFV TASTGSDGRALIFDD  
FRETYSWLKHNTPEDSKIAAWS DYGYQINQLA ERGLADNSASNKTSIAQIGKAFASNEEQGWSRLRHLG  
ADFVYVTFGGQVGYSKDDINKFLWMLRIADSEHVTGEFNQKRYKNV NNEFRVDVEGSQTWLN SLLYKLSY  
YRYGGQTVAKGKATGWDRVRKAEI GNKDFELDFFEVYTSQRWVRVYRLKTPDEI SISLY

>E4YIU6\_OIKDI

MKVEELLKSNDKDIGIVVPDNWQSVSYDCDQFALPTHYKYL ERVILPRGLVDRTEKLVLDL FHSLDR  
SVPVVALCVLKGGFQYFADVCDNLKRHAAAHYPEAIQFNMDFIRLKS YEDDRANEVQVIGGDNLEHLRG  
KQVIVVEDIVDTGNTIRKLMNV LAKYDPKSVKVTMLSKRTP LNTSGYVADFSAFSIPVFFAVGYALDYN  
EYFRDLNHVCVLNNEGIEKFSAKNLPN

>E4YIU9\_OIKDI

MSMERALFKNASFAFETSAMSFDEIENKLYWVKNGETV FSSNANGEEV TSHVTIAGAQISCLVSKGDFIF  
AADELLDEESREYKIHVISKKNEQTAVNYRV DKKLTCVGLFTRF

>E4YIV1\_OIKDI

MKLFSVLASTFAASETCSK KSTCNETKKLVPVEA INFARVQSHTNMKKWGLFGLNRFHMRKVSGPEDP  
LQKPNADTLYSIGVIDLSAGPVELSIPDVGD KYLSLTCYDENMYITAYETAPAQFKLRKTENMTRYQVCA  
LRLAVDNQEEIPELHKMQDKGQI ISPLDSYPPVDLPEYEPESYKSVYSHLMELAYYMDDLGVGLGFKGEN  
INDVSRILAAAAGWGLGTSMVKYENGKVSSNDGKTEYMLKVIGEVP TDCFWSVTTYTEDRLSYGINNVN  
SNNVKRDEGDGVIIIVFSNDHNDLSLNYLNIEEWSYIVRIYEPKQAVQDGTWKFPPEAVLYQ

>E4YIV7\_OIKDI

MASVASISDQKMSHHRNQHLRQTFQNSPYSQGSRSQ GCKFRQKILSESEAKAKSSKSRAKAKRRRVS  
KNLERKRSESENF EIFLSESEANSMYHSFMPDAPAYEFPQQGMPRSTAGSVSSIRSESGRSSALHDFMSS



VKQEEKEPETYSKVLNLI EARLDDQDATKGLMTKAVTEIKEESKSNAADLSSMLVSMNERITELEGKIT  
 SKEDLSSNQKMLLGEIDKMVDIKAQKWYKEFRVPPKKE TVCLGVQCSMSQESIPASPEKRQRRRRKRHISTP  
 PASPSPKRISTGVQKRTDKKFI SRKSEKAGLQFVDANRLRKKSPKKKVRVYFSDRIGADEDEIFRSLRPRT  
 QEKRNNAFRRIPTFFDEREEDFRVYPGTCPAKPRTKVSKAIRPSQDLPRPVI RNEPLDRTEVFFESSDDE  
 ESNRKASKEEFVIPRRRRKPPTCSVYDFTSSVYSSGDETQISI QDTSEYGSQ

>E4YIV9\_OIKDI

PSLTKLKLKLYMNTKGKTRNAFQSFRDLISKRPDEFKYLSQLQLTNFQNHKTIALLDNYNFDEIDTLV  
 LLTSQLGNMQIWSEFIEKHCTNLI EFRTNALVASYKLEHLDIYYSALQSTMAGAEVLV I SLNLPNLRFLQ  
 LANIALNERGLFNFLQTSKTFGLFPPKLFSLRRSFI PQSTTPDVL SFFLKN AENIEAIDLQGCSCFNFA  
 DLLVGIGPLHRRQRLKSVDFSGTIAKNEDDFNRFFNVQGLDCAIEDLSL SGINTKANAEDFYLPFINKFV  
 LHADRLKNL DLGRTSIEKEEARLLL ERKPHLNSL T LSGCYGIPRSWRKI IKTEEFSNAIRAFYE

>E4YIW0\_OIKDI

MSSKIRV FARRL GSGTNKPIYLQEKYSNFVPRPLSADDLILFADKNSVEKSFEFLKQELPTRWMQIFAEI  
 NALPIEKPSPLMLEVKSMI QETLENLLPFTDQPATENVISKFN SKLEDYIHRHRTAFDEVALAILEFKDE  
 QVEMAEKGLTTFDLDDAEKVHYFLDRYFTTLVSTNLI IHQHLVVCPHRNPVILGMNSDRNKRETVQRT  
 NVTKEIRKIASRIEIECEKYGKTPQVKITEFDMGKATNNSQINTIFIPHLEQI CAELIRNAVRATVEN  
 NLDLPPVEIIISRAKENITIKISDRGKGASLHEQAKWGAYLYTNPPEQSTSKMPIVEPLAGYGYGIPLAA  
 VYARYLGGDVVIQSLQNYGTDVVIYLRNAEDLKEVLPVFTAKTKEYNSQNRKKTWISGKSSEKGDIVF  
 NG

>E4YIW2\_OIKDI

MSKLNKQETLKKTVLNQNDLLRNFQKSTLDSQTALSKEFEERLDKLEDVTSKINEDFATFNQEVHRKIT  
 NLDTLSTQNAVKMTTLEETDNSYHLRLVQQQLRTSQRDNEVLKKKIEALERQVDPVLLAFGDDPREKIRQ  
 ICQQEMMRHGVIDSYSRGRN

>E4YIW3\_OIKDI

MDKLISETFEKRKEISELKASVEEDRATCLAVSDTAENISK TENS LNEKIQQVNKEIQQKEKKFQEMLE  
 KATDDVERKNDKLVESVLNLDQNAEIKSLENQLLKFDRNL TRENEIIRKKLEKHNRRISEKTEIALEKLN  
 FKVEEVDKMTKEKFLSSEIEKLAETIKDQKSMSELKEEQYLLQLETIGKSSALGTLEKSYNELQSAF  
 IHLGSRVQQKMNQTIINMSTNHRNYQRYNNEKIDELRDKLSEIANHNLQGRVRENSNLTMKFLNEHM  
 LNRTQSHQGYQLQLAQEA KRCTDET DNIIRKFNEQQAQLQSQKDEMRDLRTILLQVNCFFSINKQKFLF  
 GSGGSTRGKDKCRSSRAAKSDQ

>E4YIW4\_OIKDI

MFLVTGACLAFFVLLIVILLM CYRLYACRKENPKERHNYLHKKFNLREVFLHVIQLTLYPRGRSIRLH  
 DLRDLEKRSKQLHKLTYLQVTLFKENMRGSFVLRNLARERCLVTTLQQLKPVKVDNVERKLLFNRII

>E4YIW8\_OIKDI

MREHHPMYHRMTEILKTVASVKLSSTFLLKSYFLKKPLPMLMALYLFNVFAVG YIVFALERLRGKCMDY  
 TDVVWMMGVTITNLGFGDFTPCFWLSRIIISLLSLGIFQTALIVGVLSDTLVIPPDEKRILASVEKQRA  
 DQIRRHAAAKLIQATWLHYRQQKDRDNEPRNGISRRMTFTRYRLRRHAHKS YVDALWQWRRVKTSTETVG  
 QSLEKEFLVDDTAITTTYISRKLDAL EK MVRKGSSTPVNENNTKLKWL SAGRNALNSKFKAKPKNVNGK

IKDKSALCSEAPSKKGSIRKKPHSPVSLMDKLSLKTNQVESTNEDHSQRHPETISSEISSPEMSRDQER  
 RERQQSNIILQDHLIGKLSNQVKGLEEKQEVVQKEISSIKSLLAALKEVATESTIDSAETFSSNPESDQD  
 RLQTAFQKALRRMLRSFFNHFLNNFCHTIMFFLNNDLSLEKSM

>E4YIX0\_OIKDI

MLEVSVGDVWELASTISSQLEKLTADFGIEKIQSFVDPTIRALELLESVVEERSQLIELKLTAEKIAENL  
 RNMSSSQENSKDQGTKNFCEKQVYEEQMSKNIELHQFQQTVAQYKIKDQQHSEITRQRQMLLTYEKRV  
 TELSDELRLKECAIRELEADCDTLEGEANRLEINNELRSVHNLTIESSLPPSVINDSIAAELSHCEESF  
 SIDTENLPDRTPGPEGEYQEEEQIDQAWQSKKSLDEKDKPRYTYELEEVLENEKNKYKERCVFLEEKLRLD  
 LTNDESVLWEGLSIKDLMEMVEPTTIPVQATTPSTPSDPKSIKMMSKWFRTGPTAAYQNYQSKSSTQSLQ  
 MTPSASQNLIRSDPIDDDIKTLKANHQKQ

>E4YIX9\_OIKDI

MGCVNIEVEKGVRSRFRSADMEGIAASSEGAEHLEILGDLEHGWEVGGVFILSVYMIAAALLKLGFBHQ  
 ICGNPPFPEDSVCSLSAPDLLREGSAYLIQDDQNIADIYFTPTIFFVILPPIVFEAGYFMPKDPFFDN  
 LGTILTYAIVGTFFNAMAIGGSYLVVEYGLVPGFDEHISFIHCLLFGSIIISAVDPVAVIAVFDEIHNVM  
 TLYICVFGESLLNDGVAVVLYRVFEGFATLENNEPPPSNWGPEGQLLILDLSVKTVFVYVGLMTKYTK  
 HAPIIEPLLIYACAYLAYLTAEWIQLSSI IAIVFAGFFMKPFCEANMAQSSISSLHYIQKLLSSIMDITI  
 FIFLGISAISDFVWHWNTGFVVCIQFKTIVFISYRVISVYVLTFILNSGRLDRISYVDQFVMAYGGLRG  
 GIAFSLCKLMCINTVPSIQSMLCSTMVAVFFTSFVQGMTIKPIVEWLQVKKQGEEQVMKEMTESFVDH  
 LTVGIADI IQSRGRHWWNRIANLTDEYLTPILVREPKIKNQSIIDVWAQLNVEDAAKLQKQTDVKNY  
 HGLSDDDDLLKMRLLLPGALVEDERAGGDKAPHGHEGGEREQTDIKMHMLRDNL YANRQRIELSG  
 HMKYRNLGTNAEQSLTKQQEILVRRRIKSLKETPEQIEFRKQMRKTEAQRKTYRKTISEGRKTSIDP  
 RKTVTTPVTPPEPEMFEMSQRKTKILFEVPVDPTPSSDLWRNSGEDDHAARSTHGRPQSQLEHEKSL

>E4YIY0\_OIKDI

MRPTTTPRTTPVRTTRRTTPYVRPSSPASRPKGDGGKVNCPGKNIKRCRDLEAQKKKQHDAPSNSPIFE  
 QHMAAPVMESPVKDRNLGATGAQFDSFIMDFLSPFLIEDPVTTPQTTTTRAPRTTKKTMIGSSSFSFTG  
 YGAPENSSGVCRIKPKSTIYAAISSAVGSREDCGKCVFVWCPSFSGCKGAPIGKVQIVDVYDGPGHIAL  
 SQAAFKAAIGLPSTKGNMKTYQGTYSFTSC

>E4YIY2\_OIKDI

MWIYEPRLEYLKNHKKISCPYLPALQARFSTAVLFFFSCILFGMRFMCKPFLCPSMLVILSCLGVVHALF  
 MMGSSSTTATFSLVLGNI IWSFGFIFMMLWFYKYAYYYRKGIFENFYGKACVYIQASLIFINAFVAI IW  
 QLPNLDEIATSSLSCNVAGYQQLKIYFYNFDTHERALTEIVL

>E4YIY3\_OIKDI

MANRDEEILTQSQCLVEKPEKAVTYEESLVDTANGQPNENKAREALGYKEEGNAGFMLS VFNLMNAILG  
 SGILGLSYAMAQLGFVGFIIICLAVAVLAYFAIHL LLSLCAKTGVKSYERLGYRAFGTPGKLVTA VCILM  
 QNIGAMSSYMFIIKNQLPSVLHTIIICAAADTPEECPNLYGEDVPWYLNNGMMVIIVVVCVVAPLASLSI  
 EFLGYTSGFSITCMVFFTIIIVSKYFIGVEDCPLFDDAIANGTWETSTEATCNLKFARLKFYEIPFSAPI  
 WDAENSKISDECGTTYKMPGYPYCNLEAQECGASAFVMNEKTVYAMPTMTFSFVCHTAILPIFAELKSGSH  
 AEMKKVSKTSLGSCFLFYIAALFGYFTFYNYVQSDLLLTYNHS DPTNPLTLVVRVCVLIGVILTLPLTH  
 FPARKAVNFLFFPKHPFAWTRHLGIMAALLALCVTLVINVPDIREIFGFV GASASGSLIFILPSLFYIKI

QRDEKLPPFESLKETRLLMASFCFLVFGCIFSLMTLGIMTAAKLS

>E4YI22\_OIKDI

MWKNAARQIGVIGNHSYHPCFQIKADEPAKGVVFFMHGLGDSGMGWADAFANYCADPNVRYIFPSAKEMP  
 VTLNMGMNMPSWFDIKELASASDRYDLQNLNRTSEEMVKIVDEILEEEGLTRENLVIGGFSQGGALALN  
 IALNHYENVAGILAMSTFLPIDEVSKNYKKSPLPGPISQHHGTADGVLPPFFAQSAEFFKKVASKEEDFQ  
 FFAYEGMEHSSCLEELQNVNDFVKKCLNL

>E4YI26\_OIKDI

MTSGQDSLILRCLRSFFEGIKCCIFKCCGAFFRTPEQGAQTSKLCICDSALTTGKYFSNLQEAPVQIRGS  
 RKLEKIQADLWNITEDFLKGD

>E4YI29\_OIKDI

MSYPGSGNTWTRILLEDITGIYTGSIYRDGSLTRGGFKGEGTNPMMKGQTMIVKSHFPSNQVMHAAKAI  
 FVVRNPFDAIAEYKRRRRGHGHTSVVSEKVFKDKMWLGNAPRWLDGWRLAKNVTSIAAANNLPLHIYSF  
 ERLKENPTYEMEKVLNLEDAINWKPDRYKRLKCLGELQKAATSFKREKTPPSFEYYPPEMIEIGNKAI  
 HEVHKNLLEAGFDVFDVEEYLRS

>E4YJ07\_OIKDI

MGFTITLQPESEEQNCELKMSSTIQTIKDNLVGI RAGFMLAWLLYSYLVFREDPENRYEGQYFFDYVSN  
 ANEFCVAVVWVTLFARHSTNKRLLFWEKWSAQATGSWLIALVYVMMETTDKTFHSFWQHGLGIVT  
 SLDFLAREPFAFKWIFAPVLYCGLNVLYLFTIANLWPEYRSTMYSFTDYGPLGSDQMWSVLKLSALTFL  
 IQPSIFLWTLQHIWSAIRRRVSKNEYVMTSDSDQELIKT

>E4YJ09\_OIKDI

MNIQFFNFEILEVSEQKMPANVRQMSGSQNRHLNRQELATMSNLDKRLKGSRVGPQTLLDKHEAKKN  
 AQTQKQYKTAIEEYEVGQDLGAGQFAVVKRVRHRKTGKFYAAKYIRKRMKTSRRGVPQEEIEKEIAV  
 LQDLDPRIVKLRESWNTANEIILVLELVSGGELFDYLAEREQLTENEAAAGI IKQVLETISYMHCLKIAH  
 FDLKPNVMCLPGNPAGGAPKIKLVDFGLSQRCDLGEVTAMHGTPEFVAPEVLAFEPIGLEADLWSIG  
 VITYILLSGCSPFQGDKAETFQRIAQMDYSFEDEFAGISQDAKDFIEMLFTRNPLERATAKDLKSSW  
 IKRFTPEGKAIDIEAEMRVLRRQKELEETVKIHEGQFEKQKEAVQSQERNRQASGDSSAAGLLRKLSEQ  
 RKNLQRDVEDDFTQLIGKEGARRRSLIREPSEVQTRHYDTSFNINGRTYDVQQTRQTIGSGISRLEQS  
 ANTLETHRTDIRRMTRTSQNTMDSLNRSLNSSLTRFSSLGSEVRSRFGSDLSTTAYSSLYSGRKKF

>E4YJ10\_OIKDI

MPPPGYVGNFVTNPHCIMPDLRDRGGTPDQLTPNEEEDDDDEPIIESCCFCCNLGFGILFGALFFLIF  
 DVVFLVKMKNLFFTEIVDVFVEIENKITTAMEIISTIFSAFVLAASFILLVSVCGSPDKKKTMGIV  
 SRYWAFQIGLNALFQAVESLNTMPRDDSEFFVSLPGIGVDEVVGGVAIAVTWIFTVGYIAAYFFMILIL  
 ISYAAVLKRSAKKKLESYAKRKQREYAAMLNLPNFDNSDLQSQITVSDRISDMSAYESSISPTIGEGNY  
 QDVISLQGGKENLEDIYQRRIPVRRPTGYLPRNRSVPDPIILQAQLAMLHPMQKFQFLQQQLNARQQMML  
 PNRPLPKISEDQSDQISEISVSKPNSSGHNVRFNSVNKEATIIEDSTQVAPSFGRPRANYVPEFSLQNG  
 QMGNYSRPIRPPGPTRNLSFSMQRPGYTGS

>E4YJ14\_OIKDI

MGRISEEQHEEYLESEAFVSCDEELQNEQPRGIVRLKQQNNLKSRRKILTSFERENQQLKRRISQFAKA  
SKEIENILSSRKKIEIYSMPRDSAKKEKKESTGGAGAGDELSGHSTLLPELQKQLSKAARKERRYNGI  
AIF

>E4YJ15\_OIKDI

MEPIIFFLIGSCGLFVIIIVVVSIIYCRCPSSKKKETPARNDTQRNVLLPDIDEEENFPCLASSNRAETNW  
KDSQDSFDQSEDEWVDQSSPNEAIKLCYVVTQTSASQSQNGGSRPISCSMHSSSNRPSVKPPAPPVDPH  
SALLNAPPDFPPPPPPAPESSGNMIANPKYPYHVPIANQQQH

>E4YJ17\_OIKDI

MKLLATVLLGLSKGEIANCTAEYLTGLDCTGLSADGNSCDTTTHRCFTSPDCHTEFGCRLLDECPCGES  
IDNEKICLLCPEVTTSRPEMTTAPETLVEEPPPEILRSFDCSVNEDFTLDRMSTGFPRGRFLPDDREF  
CIVNSDTSSAVKEMVSSRNVVTGIYNSGECSCFPDPSNNGPISFESCPDVFGNSKRLVQEDGENFTIWT  
FGIGFDDLADNDWGASYLYKRGYSWEFECRIKTSGEVSVAAGQSIWERIIGNGVGEDELKFDLIALFEG  
NPVNDQVIEILEDTRLLQFDLDVLEVSDKYMPFYKSCDLIFYNTEDIMRQTSETSLPNIINNGCVNPSY  
VSEFRMDTLDLGRDVLTFWAPKIFETSGSQQTALLTCRVNGCTNFGVTGCTPDPQCASMPVTRNNGSS  
EVVGGEAKAEMKMSGADTFTFSLSLIITLFFVN

>E4YJ21\_OIKDI

MKLLNFGFVVAAGFDVSYDEESVNMENAEIAEIPHSNMDLGWAGAREPRGWGEYYDWNILDATEE  
FAEDKPILLVIPEDCDDCVHCSAIREEFKNNQELKISKHFHVNFVFLGYEESQAHWDPKIANAHYFPRF  
YFLEAHGDIIPWAVNTRKDDR VFYYNHASEILNTAKEVFHGYKYKHDEL

>E4YJ26\_OIKDI

MESGDDEANENFFHEISKQRFDRLFTKNFPGANSKERMAHLEITEEVPGTGGVRITKESVNERGTG  
ITVGDVAVTTEAERMKELWHYDYNLLPTAPLVSIHYAMWIGDLDLDPKPTDYTYDRGNIETGASETQVIGNGS  
ILAGLEKAILRMTQGSQHVFILSPEWGYGKWGNLPMIPGNATLVFQVYVRFVSYEIEDRFVRMPMRLREK  
IPLKVLSTCTRLKFEAKKHFEKTSVVRKQVNRNTGEETYKKSCKNTGDFFGAERAGELLDCAANLERA  
MCKNLDEEIEMRKMLIHLHSDACLFRKSKPSIFKKGIEHGEKLANFDELKEIFMARMNCEEYAGKEQM  
HDFLKVVYKRIITKTRNLMELYSRDIYNMFEDALRMYGAFDDEVHNDDEISFKDYITKQEQLKDFLMMK  
KLVNDRKDDWIKQEQEGNEDEPEDENS DIPVAAGGQENDKFKVIKLSANRLNLGKCI EALNKEDMEADPT  
SVPYPSSY EYMSFIDRI IDEKDPNRTGHMFSHVHTSKKAVNFI IAYASSRGMKCFKRICDGMVNLVITS  
DESKESLLGNHQ

>E4YJ27\_OIKDI

MKTSSLFGDAKSPNSDLSPPSIDFSFGEEFTGGIFAAYFEAPESMIKMPKDSSEVNSQVVALQIGDS  
ICDYKICSSYKIQEGDIKMVFPQFENRLEGETKCSYWNMTQKQWATNGVSMVARNETHITCTTNHLNFA  
TVHYMPGNGRVSSKGLEITSNIVCGTSSIISLIVFLAMIRKIRMSKGPVTVSRRSKQPILIAHLAIAL  
FIKMASIMTSLIFDDSTVLTDEIDFKCTTNGIILASMVQFAQLASICWMSQCAIDHYVKITRVAEGNLE  
YPRRFMNFLLLGWGFPTVILAILILFFNKVEVFVDSLISDVERICWVNAGTLYVCWVIFACFFMLNL  
YIFGKVMSTIIQMRRTGGGLKRSDDRLRRAMRIRSRKEVPTNLS

>E4YJ28\_OIKDI

MPRAEISIIYLVVAGVIMVPLGSAVLFVYLTTSHIWMVIPTSVTIGILGTVLAFQECTISNNELDSNESI

ISTRSTSVDSLAAALSLDVPQASVTPHNASPIPLRPQRVKIQPEDQSLDQKEVQRGIENLARRSSDHEIIT  
 VSENLTEFPVLVFCFDKMAIDTKEEVILPNVPSIFDHGPVVKGLRYDSNNFRLLRPFWKKNRVFKSSV  
 TPQQY

>E4YJ30\_OIKDI

MTSLRVVAELQNPISIRDRHWHQLMNATGVRFTMDEKTSLDDLLKLNLFHEDTVLMTIWQEVQRTWSYLE  
 SIFIGSEDIRRLPEDSDRFDGIDKDFKACMEDAKGNLNVVHATNKPGLYEQLESMQDRLTLCEKSLAEY  
 LETKRLAFPRFYFVSSTDLDDILSNGNNPRVIAGHLAKLFDNTTDLKFADDTSKMAVGMYSSEREYVDFT  
 NECNCDGQVEVWLNRIEMESMRSTIRALLSEAVVYEEKAREKWLFDYAAQVSLTVTQIWWTTEVGIAFGR  
 LEEGYENSMKDYSKKQIQQLNLIITLLGDLTKGDRQKIMTICTIDVHARDVFLYSYEYLGNTPRLVVTP  
 LTDRCYVTLTQSLHLIMGAPAGPAGTGTETTKDLGRALVLSVIAVQVKCIQDAIRDKKERFIFEGCDI  
 SLVPSVGFITMNPYAGRTEL PENL KALFRPCAMVVPDFELIAENMLLAEGFLDAKYLAKKFITLYTLC  
 KELLSKQDHYDWGLRAIKSVLVVAGALKRSDRGRPEDEVLMRALRDFNVPKIVTDDMPVFLVLTLASNER  
 IPLNNTMRLLFEISNLRATPATVSRAGILFLNASDLGWNPIVTSWIDTREVQAERANMIILFEKYVPPC  
 IEAFRTKFKTITPIPETAYLNTLCYLLECLLPENVPFKTIKFPSQGTVPDYINSEDKRFVHSEMCAE  
 EKFIQDPEMPLQATIVPTAETTRVRFMDLMEHFVVGVPFNFYTTSMMLQEILEKPLEKKAGRNFQPP  
 GSKRLVYFIDDMNPEVDAYGTVPHTLIRQHLDYSHWYDRTKLSLKEIHNCQYVSCMNPTSGSFTINPR  
 LQRHFSVFAISFPGMDALESIYKQIFEQHLLLNKFSANCTKLEPLIKAALSVHQVSTTYLPTAIKFHY  
 IFNLRDLSNIFQGMFLSSNDVFKAPTALARYIHEATRVYCDKFTKADIESFDALVTEICKKEFGDLQ  
 EELFAKPLKFCFHSQGVGINKILTEALDSYNDVNAAMNLVLFEDAMSHILRINRILEMPRGNALLVGVGG  
 SGKQSLSRLAAFIASLDVFIQLRKGYSITDLKVDLASQYIKAGVKNQPMFLMTDAQVPQEDFLVIND  
 LLASGEIPGLFADDELEEIIISGVRNDVKATGMEDSRENCWSFFIDRVRRSLKVVLCFSPVGVKLRVRARK  
 FPALVNCTSIDWFHEWPDALKSVSLRFLNEIEEVEPEQLKTSVSEFMAFVHTTVNEKSNIYRDNDRKINY  
 TTPKSFLEQIKLYENLLRSKKKELLGKMERLENGLEKLLKATASQVDDLKGLASQEVLEKIKNENADKLI  
 IEVGIKTEIVEKERAFAEIEEEKVAVISKEVGIKRADCDRLAAAEPALLAAQALDNLNKNLTELKSF  
 GSPPPAVNVVSAVMVLLAPGGKVPKDRSWKAAKSTSMANVAQFLDALVNYDKENIPDTCLKAIQPYLDD  
 PDFNPEFIKAKSSAGAGLCSWVNVIVSYRIFCDVEPKRNALAAQANADLAAATEKLEADATQSTISLANR  
 LVGGLASENVRWAESVALFKEQEKMLPGDVLLITAFVSYFGYFTKKYRVEMMNDMFLPFIKGLATPIPIT  
 PELDPI SMLTDDADVASWNEGLPADRMSKENATILCNCERWPLMVDPLQGIKWIKKRYEGKQFQIVRL  
 GNRGYLETIERSVSNQDVVLIENLSEYTDVPLDPLGRNTIKKGRYIKIGLEDQLLADVRAERPDLLEL  
 KAELTTQQNQFKITLKKLEDDLAPKITEQNINEAREHYRSAANRASLLYFILLDDLNIHPMYQFSLKAF  
 NVVFATSI TRADKSEEVKARVNNLIDSVTFSVYVYATRGLFEKDKLTFTAQVAFQILLNKGEINPLELDF  
 LLRFPKTDQGSPVDFLSNIGWGLKTLSEMEFRGLDRDIEGSAKRWKKFIESECEPEKEKFPQEWKSKT  
 SLQKLCMMRCFRPDRMTYAVTEFIAEKLHSHKYTENRSVPFATS YEETGPGTACFFILSPGVDPLKDVEAI  
 GKKIGFTFDKRNHFHNSLGGQGEIVAEQAMELAAKEGHWILQNVHLSCSRESEFKSILNSVCYFHAVVC  
 ERRKFGPQGWNRYPFNVGDLTISIDVLRNYLEVNSKVPWDDLRYLFGEMYGYHAYIDE TLPPESPPLY  
 GLHPNAEIGVLTKTSEELFRTLLEMQPKDSGGSGAGVMTMEETVKAMLDEIMEKLPEEFNLYEMQSKIEE  
 ITPYTVVAVQECERMNLLINEIRRSLKAVNLGLKGELTITPQMEALMNSFFIDVVPETWQKRAFPSMLGL  
 TAWYGDLLNIRDLDAWSADFAMPNSLWLGGLFNPQSFLTAIMQSMARKNEWPLDKMALSVDVLKKSDD  
 INAPPREGAYVHGLFMEGARWDTPAGCINESKLELTPAMPVLFVKAVPIDRLETKNIYECVPYKTRDRG  
 PNYVWTFNLKTKESANKWVLGGVAILLAE

>E4YJ32\_OIKDI

MLVYVGC PKFLSSRQEDELVSRRCQKRIKLNQICPLHARCVAFSLSSNSTAARQAASIPRRMR

>E4YJ34\_OIKDI

MDGLNLPGQEPTSGRKSGMQEFGMKLKGIKKSLRKTMTGESMRDDTLEETVEMNMDNWSMKSLDESVMG  
 WCSDRYDEKLAKYVKFVTDSMFFGLLINAIVVNIIFLFLEISAKNDPIKLFKTIKPEKASLDTLSYLI  
 ELADTDNFDYKKWLEDTDIYFFLSVYLVEFALKFYVELYGYFFAFSNLVDFVLLVSFIQIALTSDNSA  
 LGQVRFLKILRGLRALRTLKTLWMFGGAQVIIVSIFKSMGRTIKNIGVILILAIWIFAIMMYSTISLSNH  
 PEAVREDWGCFTACFSNLFIMTTADGWFLTERAEKAVGSSSTSFASSTFIRFCVGCALMMSHFIFNL  
 FIAINIAQVDEANKEYMDSVNTEREEQLEIKKTKIQRQYDDVKKLREQQDAKGCSFDEL IENFKQGLKH  
 DDYTVTDGIVTDIDWIENHRNILDQLDSTYKVVQLIFEYTNVLIQAQNEALKDKALNVFRTRMKGK

>E4YJ37\_OIKDI

MNREAHQDQFTEADEDVMWSTCLFGVGAVVVLLVGLSLAYKQISDNWQVIKMLMLQIPLLLLYLDQGYM  
 KFSPPGRNSNYQQRSGSYWQSSRRN

>E4YJ38\_OIKDI

MRLASFLFALSADILGYSFNDNCPEEYRGRENACVRQCSSDYDFCKNNCSGNSFCENNCSRDMFDCGNS  
 CPCHTECFAGCIGCENQVCGVCFPPDENEDHNTCVLAADRSYVNCLTNCESTGLCNTQCLEAYQAEIRSC  
 PCGAECPNGCPCNNGYEGCPADTSLTIIGDSYFVLERVTLRLSNTDVTYKPTWEIPDRFVYDSGTALLKG  
 QQFILGGLTNLTQIAILKDCSVEMQSQKLEIGFSQHYGDMTILNEKSYLCFSTSVSKWARCETFDGETVE  
 VIEGRSDYGHYFGLGHFENELYAFGGWNYSSPQSSTNYMEKKSALTGSWEFEGTFPSEVFIERAATVQVP  
 QGFLVIGGLTDAGTLSSIWLFDGKWKIAIIKFRFF

>E4YJ43\_OIKDI

MAYYREYDKIYTKEAEGIHYLNFWMVIIISWIFHITMILLPRFAWFNPDQGSIFGFEFNAMKGLFWECGTV  
 SDMFLCYNIADSMFNIPTALLILQFMVCLAFVLLTIVIVLAFGLMEWSRAYEHDIEKKINIMRLCGALM  
 IIGILTFTGTMWYGITIEREFRFPNMPDNILTVHTDVVRYEYGACVYLGFALSIDFICAFIFIKYPGS  
 IEYEDEVESRIYEEKNDMPSTYVPALEYAAPTYNTRRFKDDFREPADLKLGNLTSFKSTKSRFKSRNSR  
 RSQPGSIIISKAPDFV

>E4YJ46\_OIKDI

MTNPSGSAVREGAIYVEKPPSQKRNQYTLTYRYVKPDLTTGEGIYNMDLMDLPPGLKIRAHIEGQNMLA  
 ESLAKNSPDYRYKIDFDQKIATPSEPSMIKGNWGWWTQEQQFFVDLYATDPVKFPKLYVPDSPIFPREIRG  
 GLWQNTIMLNCNVSLDHFVEMLELSVSKNLFIKIWIYRSSEETKRELTWTNMGDIEAIFPNDSVVVY  
 CLQCEMNYVLLLIWWFASAIMAKTEPSRHFSKNREFASLMIHCRVNEYETEWMPFAGSKTIAEISYHMLA  
 YAFALYEAVPEMITIQEQPKIKIIGLISLSQLMGENSVMNRKVIDPSLDRNYENYENYISHSIAYDAN  
 FQPVKKASGRHCATWELVTNPRKYNQATEPETMLMSIIRIYNEARTTWHQGLGYEHASTREVLAKHSKI  
 FEKEVKKHVDIQSSPEYQEVEKKNDLANVAKLHQLKILQSDEAHKALKLTELQASIAAMNEERNEMAHK  
 ITEMENKSKLEKQSLLEEILKKKDAEGKAEREALTSQINALRTLVEYQASLEKDDIEMSEEPSSSASIAT  
 RSKVDANGRAKPPTRPNKRAQQDNGGTGASSLFTTTQTTARKDHMSGTFPSMNVRPPELSPSQIADSTET  
 PYQKPNFIDLTTTPDLLQMTNRSILNSLPGLPRKRRETELKNEILINYPKTPSDGNLTPPSSDSFIHQI  
 REMDNWPESDSETNLTLCNENGESANSRQGSFHEEPSTQDISIVKLDTSQESISPAKFSSLPPIPREKS  
 GKQRKTEYTEILKSLKSTPNSERKRNHEGKDLNCSAKKRKITKSPPIDKIRKIKNKNGINESSPRD  
 TATPRKPIQLPTVVKMEVVLPKIFGKKPKEKTNKVEQGERMKPVERYQITVSPIELTRSNRNITECTTD  
 SQATQRSKERDPKPKLFDNEFIKLRQFELDERSREQMADLAEYKDL CNGSKTMKKNKDKKEENWNLF

GKGAASQKNEQLSKQIMLLGGSMGIVDQWDYALAEHEDIPRNVDKIMQKIKDCEAQKSELFAHND  
 HGVIKHKKQYISALFASAFAGLTVIENIMDHRSNKRVIIEYGFDTPESHKELKTFRRKMKELSKFATNGK  
 RVLSTWQSFPIILLSGLIPVPPSLKIAKLVDNFSLEQTYGEFPATSQNKITLRYLLRKLGIETIEKRYET  
 DVVRMVTNITGEYDKDHIPILIAKNSAKSKPQVQQNLKLEETVWLICINTELEPEQVNLNDLKTVRK  
 TKQGRVILTELAKISAYEPEGLGALLDIDFVNEFFSNRINIPVTKRQENKTTEAAQGGNQSRLDILEGRI  
 PKGPLEPDTTIPGPELFIKDVHKGQTMINDIKARLGNKNRVSKAEKFKQAQQAQTNPNNEFAKK  
 ATTTGITNPSDQDIDLLFQTARTINENKANANEKIKILSTNPGKACSRMREIADAEPEAHVYCLNELQI  
 KTETILDPGTWPPDHTVYSSKASSDGMSTYAIMIKNVLKHRVTPHSAPGNCTAIDIKINETITKRIVSTY  
 RHNNKDPPLCYHKNWNKSKYIFVEWIREIVRRARQDKVQLVLCGDWNICLSKHRGQDDLQMVGLKNAV  
 KSLVNLIMGNTHFRTWASPSEIDVFFVSHSTQATCTALNHRPPCSYDGHMVMSPFEKPLTQFEVKV  
 STIVEKDEMFYKQVNDYETHNRLEKSENAEKIETSYNILNEALETCSRKIGKIAQKAGIFMPTPKDT  
 WKYRQAANMLADEWEKREKEDPEKEHDAKTHVLRINLIKVSVMCKKLHARDSKTRTDKIVGKVEACNPANF  
 WDTVNQLLAEPVRELENNVKEHMEVLALQQKTATDPSNYRGHTFKPLHKVLSAFKTSLHGSKQKSSI  
 LKTFKSLKHKTGHTGISRSTIDNLPICFRMFIYEPITLAIQEGHYPEKWRCNRTQILPKAKGIRPLSI  
 QEIFATIEKLIIEQLNSFLENNFMHTSQNGFRKNLSTSSSLATVINFIARRRSEGNVVISALDARNA  
 FGSPPHESVIKCLSHAFEGKALKLSESLARDAIVANKGIFSGREKLAPLGVPQGSTTSPTIFCLYAIEL  
 INSLDPHPATKLSIFADDCILLTAGKTLNEAIERTEECYEKVGATMKSGLSMVPEKTAAILITGKEGCH  
 LHDKSSYPHTLTCQGNQVKIDRALTYLGTIIGEENRKLTYKYNIDAKVKKLSQTTNRARSLAGHIRKDL  
 QEVQRALTLGSYCHNAEVTSKWPVAEHQRAQNSYIRGLGASKERAWFLKNYENFEETTTKMKIDTLTESG  
 HPTLFEAKISGFYGLMHRTRLRESKAHDLAEAKAGIKIIDTKSGHQIINMFNLYKTDRDLAKERYFKQEF  
 DIEPSVQTKFKIAHHSAAFKILLARNISIKIILPKNLSAEAGKIMWPYCLAKEFNELPQYLRGNVIN  
 KKHKEMLKGHKRNHKLTLQGLSCGDCIEGKTNQLPFLVKNLTRNILDTEYKANLKKAVISEQEQQTEEL  
 RIKWVLDTISPIMEESTAGEEALLYWQEQVNWETDLVTSLQKLFVAVGVTFGAGLSTRIENELRHVVEKL  
 EDPFASTSFTITNLANGKQQYMNMYEMELWLSKEAEGTYTVSNAHLIKPERLKRNSRELQKVQIEQKM  
 FSTIFPNKDVFDTYAHKHFAGNKTMAKWLGENIAEIFNARFIHGETKNVWAETLEKLNKMGPNSSLN  
 LNLNSSEKWKTCRDAFKTSPRLRNMRQMFYNEIQNTIAKQPIEKLDNFRICNTAYKICQNCGAEMHTFYA  
 LLDAMGWKACSTKDQQSIRWTIMDFAETEK

>E4YJ50\_OIKDI

MSADALKNEGNELLKNNLEGAIEKYTEAITINPSNKVFFSNRSAAYAKKSEYQKAHDDAVKAIIELEPTW  
 PKGYSRKAALVGLNRLLEEAKIAYEESLKLDPNNAATKAEVESLKSLSGSPSGSQPMGNPFGGNPAEIFQ  
 KLATDPRTKEYMSDPSYMSMLQELSSNPANAMKHMADPRMQATLQVMFGINLGADADGNPTVNPTPENKA  
 NQPPPSEADPICEEKEAKRAKAAGNDFYKKKDFENAIKKNYKKAVELDPSEMIYVNNLATCYFEMAKSGK  
 VDNYYDDCREYAQKAVDVGRENADYKNIKALKRIAMCFEKEKFFDDAIKWYNKSLSEHREKETLATVQK  
 LEKQAKEAKRVSFYFDETKAQEAQKGNELFKKGQFPDAIKAYEEGLKRTADGSKLLSNRAGCYSKLMF  
 HRAQKDCEEALKYKPDFVKCWIIRKGAVLEAQKQLDNALESYKAIELDPNAKEAQDGMNRVSSLKYAARN  
 DPEQVKARAMNDPEIQAIMGDPSMRMILEQMQQNPQAAMEHMKNPDIAQKIQKLVDCGLISVSSR

>E4YJ52\_OIKDI

MALVSIAISIAEFIYMSSHMGAKGYKRRKTFNKEKNLLWTQDKTWNPYENPDYQQKLREHNMENGLSRR  
 RMNSRSTSGYQTPTRDRPFPPSKNNQHETSVL IETAPQRAKDKPHPLQP

>E4YJ56\_OIKDI

MEATFDLLPDVSIEGTCPTGSGSWGTKGEYSTTTAINNIDDFVKQWNISEQWLRCTDDLGDTEEFSTL

HNYRVRFSIPTKTNPIPRASASVYFFIRVSKTEPANYPVEVVYQVEGNRLVFPGRHIFREKWLHDVLR  
KQTMLEHVDF

>E4YJ60\_OIKDI

MGGLDNEIGVYGRGECNQIVHAELTAALVYCSGCGTTSNLNSLKNARESPVCAKLLQHTLEMSKSLELV  
AFRGVHNFEAKLLSPFLSRYGMDRDGSPKLLQEMNLGEKFDGCLLANRHFRIKDKQKSVSGSGKDKTVYQ  
SGYLDLTLAIVAEANRLPEALIAAHADPDGHCLVHAISRASISGTQLFWHPLRMSIKDHLQSNLLQYRRML  
VNYVEDSEWPVIIDEADPCYLSGGATLGLRNIHVAFALANVLKRPIILLDSKNGMGVSGDYSAIFLPVLAG  
PSKCRDKSNKPHPIAIAWASPRGNHFIPILPKHNEQQIILPSTVLPVWLVSQEDLQDYVTFKSTPSGA  
KGIQLGGGIEFSDGYLLKLVSCMRRAFLTEEKVQTSMIKLFVRDQVYRETDCTPANITANYKKAMAESRLF  
ICHLGSGIGEVDLSDLQPLGDSYEMIKEQNGYLEDNMTYQLPNNMTGIYVAEHDQLQLVFESSHPEPCYC  
GTLTTSVKHKTMSLLDLKRRSASAAQRPTGKTTLSSESSSNISSKQKPIAETKSEVAGKSGNLRKICLS  
DGQTDVMEFSSDVNTSTFLSLISQKFQVPVSTLAQIRSGHPPKVMQTKSNSPVEFSNGDRVQITLSSSP  
ASNHVATPMPSSGARIPESLQNSTDSSFIPESVKNFWKEAQSNNKTFNALLDDIGTGKFTSLFQKNGGY  
AQLTENIKRTPLEEGQHYNLMNFQDVVFCWKDGEFQVCLGPDKHVPI TDGFLYTVTTNDLKRNCISLNL  
RTSELGPGISRISGSSSAQIIDKTEELARRLAENRKS

>E4YJ61\_OIKDI

MSDEKVTENEENSGWGWASWATNAVTSAVEKVNVAEESINAI SDASEFMQRDLEEFKVVKEDSTAIL  
TAATEASYQSINHAYEGEIAKETASYTKAGVSI LGSGLRTL VVGVEKVLLESDHESEDENQKSEIQSKNL  
LPENKSNLNEEPVYETNPQTYLRDPMDFNWKVNFNKTIESRKNKLT EIL IARTNVRLMYNKLVPKK  
ANHNDFWARYLYRLELEGLVPDTEHVHAPDELELSTASMSALSETDKQESSSPESEPLEVVKKDEIKKIA  
DSDEGMDDWEKDLDLDI TEEEMNKALAEVDDDDWDL EEA

>E4YJ62\_OIKDI

MTHEEPIGTRGESPLTRFSEKLAVCIEESEPI LIEEKPKKMGDRHHMSTRGPNTSLYVRPIDGSTRPD  
EIKLLFNEYGNVRDVHIPIDFNTRQPRGFAYIEFESIEDAEYAQKKNRTRLGDKMLHVDFQAQGRKTPG  
QMKTKQKEATIRLQIEEVKQMQTEAMKRAREAMRREGIPIDKSDRDAYSDDRYTKREDRDRRDKSRD  
KERSRSSRKRDRDRDRGDRDRRRGRDRDRDKRDRSRDRGSRDRDRRRGRDRDRDQGRDRDRGDFK  
MERSRSPRRDRDRDARGDRGVDGYSGQYNRGHDRGHGGHDRGFGSYGASSHYGHDRGGNRPNYDP

>E4YJ63\_OIKDI

MVDQSVANRELPKYDFNTDSL CENQIGTVERAVCECDKMLTFTLQPYAMDLYQRYKNVNFRR EAETN  
CCEADGVLVDVGTVCVNDIGIAYEEKVSIYRPEYVHKDAGDGTNDGSSSSGSSGGTSGSPGTGSGNILLDD  
GTAEG

>E4YJ66\_OIKDI

MESWTRIQNVESDISKVMSSMKRDPDSMRLQSHSFRNSFSNDFESPRSSSPTNRNRSRSTLPIQARRS  
DIEDVRFRTSVITNEVQSGFSAADWSSNFNIFKPPPEVPKEPNNAPASRKLQEAVREQNSHDSKEYELE  
RIVSKINFSTSQFSDLTTCKTCNGDLKDAFCFIPCGHVICVDCAFCDHGGRCRTRCWKDISSTNRVYLF

>E4YJ67\_OIKDI

MKLFQTISSIALVSAQAPPEPKNCADCI AFDNAYKDEVNKNPHLIDDYVNMLKKECASAGDLESICDTIA  
GGAFKKYLEKIYHEDSKQYCTEITMCQNSIVRFYQQDDPDCTACLNFM TDLRLIARYDPPHFAEIFDAIA



KGICDETGKFEISKICYHELKGHEENARKAIMNSNQQQVCVQLEYC

>E4YJ68\_OIKDI

MEAECECFNGYESLEDRWSESGDDYACVLPCHKTIIRDTEIICKTNRKVVKIPLCAIRENHIKPNHLFMG  
NDQCSGTVNAADGTIDFEDGVNNSMTEWVNATHINYSGLIYSQQGGNPGSVISYGHGLQLHHTCSFPKC  
IHVDLDINVNIAVLNLNLGATGELTASVAVYDQPEMTSPVSHGKIFEGFDDVFVKIELDDTHDFLLSFQN  
CEAYDDSISSRPTWPLINDGFAEGAQILQNYDNSISFNKAFQDFNPNGPPDFGEEIKIQCTVCVCDP  
NLDQNCIPGARRRRSIGEESKDFIVNTSFKRQLSTEIIFP

>E4YJ70\_OIKDI

MQSSNAIVTPEINLTHIARIAYEQFGGLDVILADNGDNFKTKIIQSTDFSTDEKFEILEQLACVIKRSKD  
ITQNVQASPNLILFPHQATVVSVISPFKNDTAGCQHEPSKVQKRSSLFIQMNKSPVNFRQKIKLTLKGD  
FKHIFNLISPKGQLKLVGRNCHSPNVLRTLTYKDFMRFELDKNDLRVALSLSLQEKQKEIGNLSDGEGLK  
EDALVSLPRTVITALPIRSKVKMFPHVESSGENVKY

>E4YJ71\_OIKDI

MCKQRTCKSIAEQATIEVQKNEIYHRSRLIRSQRKFLFYRAALSTYFLVWFITQNTAVELPKHYIYLTTW  
GETLLNIYFTSAFGLSIYFYMCHEEVEKQKGMIKIILWICELFRIFSWDVGIMLSIAYWVLLRDLNPNY  
SWHCHLINSISIIADLIITDTQVKLYQFIWTIGICVFLHSMILFFVSDRVDYQIIYEETLDWGNYPQR  
SLLLCVIVVLFPIPIVHLGVYTIQRRRDRMLDRAGFKHLNPPVIVSNHHDSEGISISDISYAMPQ

>E4YJ73\_OIKDI

MKLFGIILASGVTAQHWSYGFNPSGKKRSPDLAELDPEYPVKRMAAFNIHQFRRQLLPKAYYDGAQEAL  
RYNIA

>E4YH51\_OIKDI

MRREPRPRLEPKQMLASMSGATITALTMTPFVDIKVRLQSGRLANGAKPRVIPFCNGLMDHMLCCQDPK  
ECAHSSDPYRATSKPWYLAISCPVGENPFRMLAHLARTEGIGSLWSGLPATMIMAFPATILYFTSYE  
QFRDIFESLLPETSQKVAPFIGGAAARTLTLIVSPMEMIRTRMQVDGLSWGATTSLFQQTFRAGWRTL  
GIGFSATLLRDVPFSALYFGIYETLKKQLPIESFHTKNIACASCAAIIAGILTLFPDVMKTRQQTMLGSD  
MSRSPSISSIARLIREESGTRGFRGFSRMLMKVVPACAIMMGSYEASKRYFSSAKYS

>E4YJ75\_OIKDI

MLIQKMKVFNFFFLALANDEASYTEDVGGLFRTEEHPERVSLSNIDGQVPQWLKGSMPFRNGPGQY  
GTDHFNHIFDPSAIIQKIQFDNGKVHYQSKYIDSTHRLANVEKNIVYTEMGTWAEPERYEEMEDEELSM  
ARCLHLNESFPSDNTIVSLYPIHGWMVGFTESRMVTLNDPETLETKHVLDLGSAPGYFIIITVLAHGSL  
DENGDFWTMSVGVQKESYAFMPKTAYGTLKIKNAMRSENPFAYQATPEEFLASVEFGESLNFQDERDRT  
VRYFHMVQTEYLVLVPTSIELDPAKMANACKEGQPPMDMMFYNEEKPGYFRIFDKKNMKWPKKFTTE  
AFMQIHMIQAYVNEEGSKIIFDTCETPKGDIMMAYLETVNATGQALQEVHESMLPIGVPVRYEFGDGL  
NSKTEEYVEPTVLFEPDMENWPMYTTAGTDFPMINFDYIGVEYDHFWSVGMGNVMADRLYHSQISTGDRH  
VWREVGYSPEFFVSRPGASSETDGVLLSLVSAFEGHSNLRPFMLILNPIEMTEIARIWLPEDYDISVS  
FHGTFFVKH

>E4YJ82\_OIKDI

MWRNGEPRHTIRDIGALLEMAEEEEALHTEKILREKQKRMSARESESGLKELNTGYGDSGKSLNGFYSILP  
 SNENQIRLASANLRKLWRKSNENTFVLEAFAASPPSSKNSKNGKTLKELDNVYNKRLPARVVDFAEYE  
 KDISSEASRENKFRQAEQAYKKALAERAQERIEEHLQQKQMKERQKAKEEEAFAHAKQEADRATKQL  
 EKTPEESSVPPIQTESAAINTSGDPGRRFESFLTRKQIEDQIKLWEDSCRSLHPKTDSDKQIAMKIKRL  
 IAVPIGALTQRSGEDLKIQIKKIGDLLDGKDLNHPETEKYATLCASQRMVRLAEEQLSSNEKAACAAAA  
 AVIALWDYDSRFGQLFMAHLYLACPVLLPRDPQPQDIDETRMRSYVGYARLITCMASSDCAPGTNFHPFG  
 IENLWKILASILLPTQNELGPHVVYEVLYRYSGRKLAAYYNNFSKLLAYIYNHYIPTATGGPAARLSSI  
 LDEVDQKQWQDPPGNLASNFWTTKDEHTGRIVDH

>E4YJ86\_OIKDI

MSPSPKLSNCSTEHVNKDKNMKSRMSDSDWSTDSEAESDSEVPLDLTAPKAIKLEVPVFDKAFHPPEECL  
 VVAGDLEGRIQAWRIDEECEAPKTHISVKAHADSIRGLCFAPSGKKLFSIGSDKQLLISDVETSSPILA  
 LQDAFDDAPYCSSTHEHIATGDEAGVVRFLDIRKKNPIDELLIDDGRCEDTIKDVQMSDEGKYLIAIS  
 DDGTVSAYNCKRHMFLMESESMGTDLCSIATVKGETKTLVTSSGQIQVYNYKQWGHPSDIPGQGFHKN  
 TNAKLT

>E4YJ93\_OIKDI

MTSLDSPTSEVNTFPYHAGKGQIMRSSIQAAESGDFIGEAI AAYDYKARSHKELGLQKGCVRVFLKRKMRP  
 FATPGSKTPKTPPSELHSSQRNITLAQNAPQSPRSGPKKTQRRFFPSQFLPHVKS

>E4YJA0\_OIKDI

MESYEESHGQSRTFNYPANRPEVDQNAQSLPVTDPVQLSPDSLQKTALANDYDQKTAHFPAFFNFKHDP  
 QASLAAMASNYHNPSSFQACMNSYSPGLMPGPGQLEQWNFHDQLQIPAFHTSLRSALLASLRSATFKQ  
 TEHYKSHSSDSEENKTRRVTSLTSSHLKSVVEELVKKSTSSRQHPLDVIDDAPHGKGLSKADLSANARK  
 KRRPYTKQQAIELEKEYMSSTYIALEKRQELGDRNLSDRQVKVWFQNRMRKEKKLQRLVQRGQNNFYTQ  
 PTQMLNTAMDTFY

>E4YJA1\_OIKDI

MSVAEFIKDFNEFFDDKFKIDQVIASIKNKISIEVDDTNKNVSKERSEISRKKDTIDRLKKGVEVLI AER  
 DAEKARAEIFETNKDLNSSLKNIASLLRVQNK

>E4YJA5\_OIKDI

MTTPNAQSKPKTATFNPATGNKQKLPGHRATYSVRDAAKNGIKGAYVPPHMRSATKNNNNKAEKTSQKE  
 GNTARKQLNKSNTNSNYRNKWRQHDDRADDRSNSNSNFRNWTKEQHKREKKEPKEI IKPHCELFTNL  
 PPHMRNIGGLAAFFHPYGEVAQIQVIGINDDIPENVQKWCDVKQLVPKTHSAIVEFLTARTAKFVVGVLR  
 KRLGQLTFNVGLIKPGLGEELNFQKNTYGEIVHQPSNLQQYIVTKTVISDTSSDSSEVETNKPYKRVI  
 KRLVTANPARIDQAYWSQSSSQISSSDVSAVSSSESVDYSDARAGSPISEAGSSCCKIPEDKPVDMI TNKL  
 ALV

>E4YJA7\_OIKDI

MRLPAIFFASTAVTAQFSSLDSTNKAADGAEIEETEFEGLDFEATDLQFDLILAEMSVRGRGRGGSNT  
 QQRINKQKKKKGKQLLRLLKYAEPERNRSDWLEYGCYFLNIKEDILTPGIGKPIDPLDSACHALQECLK  
 CINIDHEESKRCHPYNGYKFTSAPGDEYNDMVCRAENSCQRSTCECDREFIKLRVSEKYF

>E4YJ8\_OIKDI

MVVRKEYRIPLPISLDEYNRAQIYTSIIISERDFSKNGEGIERVQTIKEEEQTYVKRLYHVHSLMPSPIQK  
VIKKDQSVLIEQGWLSYPLFKTFTNTYMGENFLIEITTIHKDDLGESENIHDLSDDEWKNTVEVNIIDIA  
ENGPEEWDPKKIDLRKFGKANIEKGWIEKLNKNEAHMEAGARFIVCSEAKNAQRSFASKFYVFLSLTRSCA  
SRFYHRFAQPLLAKIKRIIEPQKAHS

>E4YJB2\_OIKDI

MTSNDDERAANKRARRKSIDGNFIHEDLHEVMPSQNLSEAFSMKPKVKKEKKRKTLEMHAIIRDSDRS  
VRRASVAPNFYVVEEGILEDLCEIAGEEAEIGGEIMLGDDKSDLLKRISKNTATKDIKNDQSYQSFVN  
NKITGSGSSTLELATTKESVTSGLASQPSTTICKSSMDRKKSLAAVPGKIATQIATQTNITSEEAL  
EIVEQNAKKEKSLFYKVKAVLCYKS

>E4YJB6\_OIKDI

MLIFCFFQSIFGAEKNAIEFQIANTSKAASFSGELKIYVGKNCNTKVQKGIKDYDFDGSVTYAENKGL  
TVNKGHYEMTNP IEPSSDLIFMSYRNKDRAIFKGI RLRVETGIKKQTQI IELFNSKSGMSRRDKYLIFQ  
YHNNYNSCYNPNGDRFPDNR SRCIRDATFDLKEGTMSSTDSFLIGRNTGTQTNGNAGKGAKILLYTGFQSD  
TRGNGLMFYHGFNCGEHICEYNKIGERASQNTTYELDFNDFVDNDQIIMDIRNGNIRVRDLKIKPCA  
SCGKSDLLKEFSFSNTDGIWMRYIESERHYGSSYYDVIFDFKRNTALLDHSVFAGNATVVK

>E4YJC2\_OIKDI

MSGNSVVPVDSWKQFQMSQFFNQNNQNRGFNVHMPVHLDKIVDLRSYSVASEDELARMAKKDIVVP  
AVVSPADTGATAAQEYSPMAPLRELELAMEPLATEIQEAVGGSGIGGPQAAAQVGGDLDFDFSQKITL  
PTPITVNWATADATGIGAGVLSGFLAGLGGAAVCLVLMIMWKCFSRRSPARSDCHYVHVGGVDVRQQA  
AQRADIAALRPYIEHYF

>E4YJC3\_OIKDI

MEKAMNIKEEMDKDREIECWKQQLQEKDVQINNMKRELEKKTGMIEKKKAKIMNFTQYVLDNFNEELQN  
EKKDDEPFANKDEKAVTDQETKTDEPTFWKDFLEIESGSDTQQTAKPSNEYGGFVKYDNRNRRSLPRAA  
RMRKSTRGSTSGSESDQA

>E4YJC5\_OIKDI

MDECDWTPPSAAEMEVMKQKRNRSDRVSSLMGQYMLKGYRMLDKYCPICSSILLQTPQAQGGTNYCVSCV  
DVAAEAAA EAKKQPKAAFFVVPKSKPKATLVKSSQAVTPVVTQKQETVKNVSSHSDSTVTSNDNAMERVQQ  
ISDKMVSLAEDLNNTSATATRELLALIKECSETVTVVKNLC

>E4YJD4\_OIKDI

MSPAGRESNHEENKYFKNIAHPAAHSIKALQHEEHQFLAHALDEDEEYEEDGNEQSHSHLETYHSFEI  
IPNKTHLSGRR

>E4YJD7\_OIKDI

MVLLALLAIIISIANAEDKIEIDFQKPIGIEESLELNCRYRLPATSTLKEIYFILGEFSLDASDIIVKA  
EGTSGPRHWYGDWEQRAELEHNEDLDGWRVALLRIAAALEYDQAKFTCGVNAEDILSLSEKAIIVTAEVQ  
VRPDDL V FQHEIKEKTLFVSCGAENKPFASSIMIDESLGRITISGDGVVNASYQLTPAFDGKAVTCSVT  
HPTYDDSSIVQDFKLGAPRPSSSCGQTQTEACETVESGELAIIVAVEMTREGDECSFFVTSTSPTLQPPAK

LRWEGPEENPSFEFESVVGASVNFSTSAFDNTTAAISVVAESILGASAVAFVFRHCLPIPTTTAAVSPDD  
 EAEMAGAIVAAIVLGLSLAVVFI TAAAIYFTCFNKHEEAYRPNKDSDLDDITSSVDLNEVAETKKTASVK  
 RSKSGTWNVPSGEENASLLGPSNSLRSAPKRTTSTQTLPESEKPKFASSAEKSLTIQKKHLYVCISTESL  
 LLFQCCELVCNSCISQCMKMEYARDLICPLCERRPSPRLVLPSPKFIQNAIDVSMVCKVEGCNEIFP  
 FKDKENHRKRCPEKCIHCEETYFASNKTKHLKECLPFLNNERRRLMIACDNLVAGLRDYNEYAEVTENI  
 SDLVL

>E4YJ8\_OIKDI

MTHKFFFSQFDHGDLVFAKMRGFPYWPARDICVRPRDCNVREQGNDPDPDFCWP IFFFGTHQISWIPES  
 NLRVFEENRETLGKNKHKEAMRESLANTAVKQFGDGSGEIVPKMWDLGEAARRWFRFESDETTNITEW  
 DVHSRAKKRRELETPEPASRSSGSSLSSEQESSTENMSTEEPLTSTPSLSEAGPSTIKSTESSSEEDDD  
 DPVITNYGDAIHKIADFNVGDFVGCMEYSPYGSVLSKNEDKRTVQIQFYTRSGQHKIYISKKKDITDVI  
 EKRQGYIFCHIPSEKVVHGFTQVKKTKTMFLLDGVLHTDIDLQARWELFTAEIREDDEDIVTCTAQVER  
 LEEDIDKLRSTYCERSFNPVIGCENHLNFSLNSTVSELPLGNDSSQDQSGMDEANSQ

>E4YJE2\_OIKDI

YLLYRTEIMTVAIENKDAFKSWLTETLSPICDADPKALAKYVLALIVKKDQSEKEIRKSCDQLEVLQR  
 DTERFIDKLFNAIKYKDYLKESPSKSSSRDRDRKDRSPRRRSRERNDRRRRSRERRRRSRSDRR  
 SRSRSPRRKSSDKVNTHRAQSRSPSSKTSKGTQNGCAKKKECTDYHEKGYCLAGDQCTFDHGEDAISID  
 SAKPPPLNMSLPPVPPMPPPHMIPPMPPIPPFGLPPVPPGMPPFAPPNMPVVQGLTRTKNGTAP  
 GQISRTVLNPPQGCSEVRKIPVHENTIQLKNDHFSKFGQITNIQVAFGHPENALVQFASPAMANQAYQS  
 PEPVLNNRFVRFYRPPPSQVQKGNIGQRVTRKRPNSDNAEESNTIDESDIGEIKRTVTNVTVEEPKIV  
 EEARNKQKEKRSEAVQKSIDLRNQTGLLEGQAEQKMLIKMLEKGNLGPKKRQVVDLTKQLTNSIDQR  
 RSSIKALERDIELSERRQAKAELRRPRSQRFAQTATLDRRPRQLRITGFKESERDECITHFAQFGEVADI  
 SFEEEGVTMIVEYRTRQQAESAENRGKLFNGRQLVLVWHKQEDDREDQELEDIDDTLDLESTLDSVKADA  
 EAEVEVLAEN

>E4YJE4\_OIKDI

MIEEGLQILLKCKNDLEVETIVENMSPSAKKEFPKTAALIDSPFSGLQLRLMLLAEVAQSAKNNNDLVI  
 STELLSYAKLLEQAVAFVISPALINPEKDIISACTIQLGFRQSDNVTMYATRELGLEARQILLSFCDM  
 NPLADIFRDLCLIMSVGAPFWCKIGCVKVIQRICKQRGALTAFLCALLGEEGCLKSPKICEIKNLVGLA  
 GPLDGSEKFEEIKKILETPDRLQKNIALFLSIVVSQQKIYQMITFDENEAELSMRRIKVVQLHLPENTDI  
 IGLQELHKFPVKSQTKIIYQYALALSNNVIETSNKQLLQDAVSVLSVMTSSEILSLLLYRADFSFDFLTR  
 INPKPFSASVEIPIMAEVLKTSRECLNIVDLIKFSFRSKDTELREAFCLLSSTFLESEPEFIIELMN  
 NEDNIPQILTVCELIFPHADDSRQFLLSIVALLSDLVGYSLSTKLVRRERMAPLITQLIHSEENPEV  
 MRTAKDILTKVLTFGNTQNEANEDEKKKEDEAKKAGRRMPSNDKRMTLQWSEYLDREIPLRSGAIR  
 ELTAALRQNRLEQQSDKLEKNCAIVKMQTEPFLFLSAVQALTVFALKRREIFDNLVEFLKNQASQNP  
 LAVQVGEVLSRACKELGDMAPCYASTLIPVLLSLAANKLDDMVSSAISAAADLLPLCKFLIQDIEHEI  
 GAAIVGFLSPSNEEGVRCACLAKQIFAVIGASFSTLVGGIVLDVYRALKVVNDPLSSKWLYNDAALA  
 LESVDDAVKDYLTSPSKMEKKIQILD

>E4YJE6\_OIKDI

MNLWRNMETERRKQKDKGATNVIIFGGHKSQKSSVIRTLNEDAPTECTVGLSYSYRSKGDKNFNLWE  
 IGGELNVSGRNMAVPLEHSTNVVLLVLLDLATLSQIEDLVKKGKFNAAALKKNVLAIVANKYDQLRQ

>E4YJ8\_OIKDI

MFRVFNKIQCLLISYSKRNTCSSKNKCHSFFRECKNVLASEDSNQSVIYDIALASLESSNKRSSLHEFLK  
 IINFVECEEKIIRLRDEHFVAKQMLEEKKLDEL IHLGGLEQCVKVFGGICGREMVKLVRIFEEIDI  
 PPRAMCQALNAFLRRILTETDYEIWAIEKLIKDGKYPDISTHLALYPHFHKFFAADVILRCVEKLISSS  
 AVERKESQNLFHQLIHNQNHNGHQELAGCLEDKKEFLQLVMLLEENQQHIIDCQKGRFIRWLENKNCDR  
 LRLLPFSRSFNHENKVVVYSFCKLFLQNAKEESGNDATRIFIINDFVPTTAQLTLFVDEETDENGGLIP  
 KMAEYMKSFIQANVDLLPVIIQALASFNQSPPLFYWIYSISKERDLLSNSHNFKPTVLDNLVNIYFRT  
 QKHQLKVKSATQSLIVSILGALKIDEDRQKLLAFKLSAEIGSPAYSPANPLLNKKERQLCAFTSQLEKP  
 EDISASLKRHLDLSPKNQDVFTIITTAIELYRDLHLMNAIDERVTLVSFELLKFCEDWDTIKNFEGQT  
 KTHDALLSVCAMHAHLNDQQKASVTVNINSIIARRKNKDPKFLMALKTLKTLVELGTKKKGDGFLNG  
 NDVFQLDDSESRLKGTTELAWQCASYLNHEASVAECLEALSTCDITGQIAIARNLGKEGRVIDYNDEDI  
 SACMFTLWSEIQASFGNRHVHELYGHFCELLINKNSIANNVFEQSVIQPIFKEIQKKAITRHGMILPLLS  
 QYTAGIYCSFPNEHSYLIALLTTGSAFNKDVLDLHTAKIVDHLVEDGFIQKTVTDDSDVVLKEMMQV  
 RRLGLQIIASLNVEKDANEKAVRLIHILIEEHAKESKRKPRVHLNSSSHLTKERCWQSILFVICNLHEN  
 ELDVEEISDLVDAILKTLNPDEETSVRMFQSIKLAIAIDSKQWQKFEIIEADDHLGYGGAVSSVLV  
 GMLFCIIVKCSQFTSKLIEQCIRLQQSNNFLIRIHAATIKKLYSYCLTIPALKKKIDDVFPFLGRHVQF  
 SHSQVKSNGMGRNVERVMGNLLFSYCSQSVIQLDLSLTSIFRTIPLSVGGKEINLNEELLYEYEEFQDN  
 ATSSCFKFLSFETEIDRFYKLTSKEDDKISRDLLSLDEPTNVQKIPWIQDSLIDKKSCEGLVICA  
 SLIDKANLGGITRTAEVFGAESLAISNLSILKSKDYTSLAVTAMKWIDIQEVKAINLQKWLKSMKMGY  
 CLAGLEQTTNSISIEKDFPKKCVVVLGNEREGIPTNIIISLLDVVLEIPQKGIIRSLNVHVSAAISWEY  
 TRGNL

>E4YJF3\_OIKDI

MSDNFKTKEELSAFAKECKMNDFCHLLAKKIWRLRMKVKNLKKENKTLKLAVRRILDTDKKNPSELPC  
 RICMKNHIEKIFNCGHTFCMQCACKMTDEGACPQCKKITGFTTIFY

>A8PAW9\_BRUMA

MARIATIRNQIGEISSDEALQNDLKILPSNYNFEIPKTIWKIRATKSKNVCLQFPEGLLLYSCVIADILR  
 KYTECEIVIMGDVYTGACCVGDQAARAFGCDLMVHYGHSCLIPIQETQGIEMLYIFVNIEMNVGHFIDVL  
 EANFEKHKLALVSTIQFVPCQSVKKEKIGKGYNILIPQVKPLSPGELGCTSPKLEEDVDAVIYLDG  
 RFHLESVMIQNPSVVAYQYDPYSNWVQVACPRLSIDWGAQFKKPLLPYELVTVLQYVSFRDTSYPMYY  
 ANESLGPWTNNHKTRECRPKRNHITISLQS

>A8PAX6\_BRUMA

MTSLPSKSSAVSGNNSGTYTWIPDSADNSCIAGIPMPQANIEVSTPRDDQTAWEKAQEALKKVNVS  
 ATSTSSNISMTSYHSQTQPDIIHSQIMHYYPWMEQHSLGMSPLPRLPPPPPPSSSSSSTSLPPQ  
 PSQTYGITQENSIYVGMNYGFTPSGTHLQSANVNYHPDFMNPWASSNVTAKPRQFGFNGNRSTLVSGSR  
 GEYGRNNTAPQHPIRFSINRPRGLNTAPAFHQNSQSFGLSPTIPDPVKRYVERSYMAVEKKEDRDKLEE  
 YFKQKLNPLMSGAYKAVDWDREPLPSEVNFELKMGWTPASQLKKGLNAITEMEKRSKSKHEMSHRRD  
 SRSPTFREQSKRRVPFSPRVRLPSDEDNPVDEQPKFKQTAQKQKQKKNKSGKSGRWAADERSNAQREE  
 RARRFARDDEARRAKFTMRRRLDWYIDREGEQGTSDNVVGTCDMIEKSYFRLTSAPEPSTVRPLKILEK  
 ALKLVQKQYATNRDYTYANDQLRSIRQDLMIQCIRTDFTVNVYETNARIALEQGDRREFNQCSQLKLLY  
 KELPDPSPNCHEFTSYRLLYYISVANTIDQTTLSELDEKARKDPCLSFSLKTREAWALGNHVKLFRLYQE

APRMASYVMDLFLERERKAALNACLKSFRTINITILASRLGLEEPKLCWLATFGITVDDGKIDCRTYS  
NTVLA

>E4YJF5\_OIKDI

MGVPAFFRWLQRRCGSIVVNCVEEPQKEIDGVTVPIDLSGANPNGVEFDNLYIDMNGVIHPCSHPEDRPA  
PRNEEEIFECIFDALDRMMNIVRPRKLLYLAIIDGPAPRAKMNQQRSRRFRAAKESVQLSELMAEKKLEIE  
RAGGRLPPPDPKKEKFDNSNCITPGTEFMDRLAKALRFYISERLNKEAGWQELNVILSDASVPGEHEKII  
DYIRKQRNTPHTDPNTHHCIIWGADADLIMLGLATHEPNFTIVREEFVYGKPKPCVLCGQCGHELIDCLGL  
PEGVEDKEPPVFLKGNIFIRIATVREWIAQELQIPNIPITWDLNIIDDWILLCFFVGNDFLPHLPSLS  
IREGAIDKLVGIYKRTVCEMKSMTKDGTVNLKAVEFVMRSIGRMEDIAIFKKRRQECCQRRVRDERRKHQ  
DRNKRLNRNQVHQTPVAKSGVMEPKMVNQHQKAKAHDLNKTARQIRQEAAEARLTAAKLEDQDTEQITL  
SALAKARAMQARQNDNSALDAEDEVRLFEDGWKDRYFRTKFDVSADDNDFKRAVVGAYTEGLCWVFAYYF  
QGCLDWGWYYPHYAPFASDFVHLDSEINWQRDAKPRKPLEQLMCFVFPAGSGEFLPPSWRKLMSDPDSQ  
IIDMYPTDFVVDLNGKFEWGMGVALLPFLDEARLHRTLAKVYGDLTEDEKRRNGVGEDKLFVGRNKIYG  
KLRDVEYETDKKEFHMAEEGADIEAKDIHQIQQIISIDAMCNPEDTFLQSPGDFCEDINNNFAISVTYNLP  
EFPFGVFPKILPGAKFPESNLKPRGDRSNRAPQDWSKNNHRSGARVDQAGHRMLDHSMPQSHHQEKDT  
SNDSRIGLFGIEY

>E4YJF6\_OIKDI

MKRNLESKVEDFLSSGKDSYRFPAGMFNFERQYVHALCCKRGLISASHGSGEARRLTISRKQGREEKEIL  
PQLIPDNAKHVIEALRNYQEAKWQNKQPKLEPKFRLNFHSPSLPNRQYNKPVYKLQAFRSALPIAEKK  
TEIVRSIVNSKVTIIIGETGSGKTTQVPQFIELEDAEERLRPTRIYFSQPRRLATITCASRIAEERGSVLG  
KEIGYQIRLDNRISNDTNLILCTHGVLLRTLVSCKENREKLSAMVSHVILDEIHERDKNADFLIELRE  
MLKSGELNRLVMSATIDVNFRRNYFEKDIQTEAVSVEGRGTGYEKLFSRTIDNNLVKLLVADLWQKKEF  
SNTGSILVFLPGYGEIKSLGLDLIEHFHKCNLTPLYDDESSVTPQCSSRNLFYLHSQINPRKQAEAFRVG  
KKKIILSTNIAETSVTIPDVDFIVDCGKQRMKSFEPGSAVSMWLTTLISKSSARQRAGRCGRPGTIGTC  
YHLFSRKTDFDEIMLNEQAPELVRIPPEICLSAKMLGGDMKIEEFLSKAPDPPTQKTCNAVEELKALGA  
IEQNEDLTPGLRLLVMDPLDPRLGKAVLASVLLRCVDPVITIVTSLGYRDPFVIASNGDDNHLTKKFKSA  
MSGGLQSDHHLILQAFEAWNCGCKGNWPIHRILSMPTLQYIKDVRRTIFDHLKACNLQPSNDNSHDWNLV  
TACLSIGSPFNVRMTNPKSTGRGRKQFTVISANQRKLFQVAKASMYVENFQISESNHWVIFDEMFIAR  
GAVPNLKTVTAVPVLPIALFGGIDRPMIKSDEGEVYLQWNQVNLKLSASHQVAAKFAHLHKDWNFAFN  
ALETRNRDDGLVRVIQMLLSSDGNIRQAPNSNYSGARNESRSNGRYFRGAFNRGRGRGRGAPRGA  
NALSDSAANYLMVNELNLCHMRGRGHQCELEHIRGQFESLHGVTTCGFTTDGKNVAGMAFWFSSIENYG  
AISCGLTYSNINTAALKRASDDAAAYGSPCYEHLKFNTCASMMISQRANEWCPTSDSHNIVSDPAY  
IYVSGYAFDFTYPPGGQYGIAYCISR

>E4YJF7\_OIKDI

MPLQFKLVGVIFGTTFSVLNKKVWRAYFPLEQVETSLVCDQGTLWNPETSKCVSVQNNQSPVVALISYF  
SDVYNEIIRPEEQAVVPYCNDGFLNTEETNVCDEIETPIDVAKWLEKHQTFVLPFTGDDHVSFNALV  
ALACAVFVGVSMILPLFSLGAKLAYRVTGHEDEETSNTDENDNENEPLGEHYQKMAQEFLDGVSNTVGA  
GDAPEL

>E4YJG1\_OIKDI

MKLFNIVLATASAMGMKLNQAMGKLNPDHEMGLVVPESQATGLIVPEILVPEDQPAIKIAHSCEWDY

QGENNRLINCEADEALDILDAWYGRENSSSTCNVARGGGILYNAPGACRRDAKAVIEGRNGQRACALAFG  
NSFVGDPCVGTTKYLEVYYRCVKI AVPQQAPEIHIDEPPKMM

>E4YJG2\_OIKDI

MHNPIIEHKQIECGCVMSIAYKLPYSPRPVFKPCNPCTDRMFSTEEHFKQSENLRKKMVLQPKTFTPLEI  
VPEKQEKKIDEDDSNFELIQSTVEKIDAQERGPATMIVENSEGSFTFSIESQTVLEDEITIMRECISIHV  
GQAGVQIGNACWELYCLEHGISPDKMPGDNSVGVTDDAFNFFFSETGGQKHVPRAIFCDLEPTVVDEVR  
RGDYKDLFHPEQMISGKEDAANNYARGHYTIGKEMIDAVIDRTRRLADNCSGLQGFLIFHSFGGGTGSGF  
SSLLMERLSVDYGGKSKLEFAIYPAPHISSAVVEPYNSILTHTTLEHSDCAFMDNEAIYDICKRNLDI  
ERPSYKLNRLISQIVSSITASLRFDGALNVDLTEFQTNLVPYPRIHFPPLATYAPVVGRAKAAHEQHTVM  
EITGACFDPANQLVKCDPRSGKYMACHLLYRGDVPKDVNAATAHIKTKRTIQFVDWCPTGFKVGINYQP  
PMTVPSGDLAKVRRVAVCMLSNTTAAEAWARLDHKKFDLMSKRAVHVWYVGEEMEEGEFAEAREDMAALE  
KDYEEVGDSDVDEASRHEEDSIY

>E4YJG8\_OIKDI

MKSAMVLLLNV DGLGMFENYMSLLNAKTQMEHVNSEFALGLDAADRAEQLLTVNSVSPQHGQTSVPSFFT  
SGLVSPSSANKFYMDGMRNQALAGIQSLSPYTDLLFAYAQQKNSRSRHHGYHF

>E4YJH3\_OIKDI

MWQLIVVSLFWGITNPFKSGGSKLDEKMGIMQRTISLYSNLSFFIPFVVNQCGSLIYYYSGLGFPISLA  
IPLVNSCTLFLTSLGLQLFYFSYIISDL

>E4YJH4\_OIKDI

MDLSQFRWNAPRKKAGGPEKSRSTSRSSSSPKKQHSRSRSRERKYSDDQNTSENSRAGSPAKKRKKK  
RGRKSKRSRKS NKYRNDANSEDEVQPKERDESEPFGLGEGPMWTAPRGRGGPRGGRWPGADFPGRGRGR  
GLRGRGYRPNYIAIGRNIFPGGTSDEDESSSSSRSSRRRSRKHKSRSKSEKRRRRRKKSYSSISSRS  
TTPDDMKNTPHEHKKGRSPTPEPSKEVGLLDKLLKESQDDVSLDRVQDIMQQLASGATEIRRGQFVQSFS  
NQDIFDNNETPILRKEMIDAPLQPSFPQIRSAVQPRLFEDLPNHLDPNDRGLGLRQMQETENQRQK  
AIEENIQKQAEKRIKSRVVALNPEEVIAAQMKADKMASSFMARKRSAANIRAVADIKEEPDAPPKAVT  
LPPLKTESIDDAEFLKLNKQFNNERGMKIMPINTKMSFAQLTTNASRKGKLTIGGKGLVSKFQAPKI  
LGAKPRLNNTSSTETPESLQTGGQLSPVVQPDNLGNHETPFSTDILSNAPLLDPQNI GPKRPAIKIKPTSR  
RATSGIVLPSAITSVKSEPVENS PN FESHVPQATTPTLSIKTDPSLYSSSKLNAGSSGFKIAPPTSNLPT  
SIPSMGPKDSLESSKNPLDRPPPVIRRVDVSAVLPSSSTPKTPFEFSAKKPAVEIDFTKPPPPFSIPPP  
SFRAGIPFSTFIPPPSLAAPPILPTGSASQPQIYSSNAPPPLFPPVLSLSRSEPEMEAVRENPKFKDVYI  
LYPSIWLGFVGMKSKAAMIQLHHIDGNQHIASRLLTKSLVHPSSDGSKHPIIKIKSRMKLDGKAIDTIKR  
KWTDIPYKCVTMLALPYGVDPDDTEKQKQCLENHFSKYFAGKNCCGNLQINHGDDWHIYVFPPECFMNS  
SLVEKASDLANAVEKLPKLMITIPK

>E4YJI6\_OIKDI

MKLSTVVISSVASQAALNRNPNNGKEDIVYTPLQAEIFELNGLGSIPEILINRDSNEADELTPKILEKQFG  
SNFRAELDRQKENIKKNGKGFINGVTIDGAFGGQWRIIRDINGIWHVPMFFGEGEVWADKSRNIPFWGDQ  
ANVVMGKDMIRKIQEFERASCLTIDVFDDEAAVLSYFDSLSDAMYDTANGAFIHPSFASTGTLSRLK  
AINGSGCWSYVGVFTNQEISFVDEWCAGGVEPLHEMMHALGFHHEQSRYDRDSKIWIDENVCGNAGL  
FSALLYKAPRSAWPDMLNQWGREHDYTSIMHYESWVCSASGTGHTVDGSTNSADGKDWKRYGFLTNTGEY

LPTESSLDKRFEMSDIAQINEIYNCNDRSNDHHFKTFMLYCDNNPELAYPVGWRCDCGSCDCSDDSSDCSD  
 ENSNCNIVQKSGTGGTLGGGVGSLATGDWINLDQLKAMSVGVRTDRDGTGYPCKYGYRIVDDGSGIKCE  
 CAPWAGNGSQWGADVLTIEGNNCDVNPDQCTNECSSVTGANCSLDNTKFNQVDCCTDTATEYNIVNGA  
 CVERNRCEGDTHSCMSEAYGGVCTWTTDVGYTGCRRGYNGGCSYRAFQENEGGCDSTWEDILVGVQVS  
 EFPYYSTCRTNVAVCSDTGSQGHDCVATASCTMIEERYSKGLVGGTYTCTCPTGETGDGKLSGTGCSGDV  
 CFNDPTLCPTLDNLGNTISTCVANADGTHACICPDTHTGDAVSDGSCILKIDECVEGTHDCGANQICIDR  
 ESLFTCDCFVNFETYGFSGTGSYENGDLVCTDVDECSTLTMPCAQRNSVCTNQPSECDVSQDVGQCTSF  
 LNFFDPAYGQNCPIAFNCNHTCACASAGFVSTDMIMFLDQGSVFTFTGIDCDTPEEYNNCAVTGDGTGCV  
 PFCDNQCSADPCVDTGALSYNSELDGYARGYICDCRSIDMYGDGIGGCTAAACAPANSSSIDTSDTDFH  
 SNSFPVVEDWACACDEGFILSESDLGDPKDFCIPDPCVALACDTATSECSRISDTEAVCSCLSGFRAV  
 NGETNVCEDIDECSEGAHNCPTVTACVNNAGSFECGKPILSIFYTLVFLVLLHIFILLNSLYIKNYKH  
 KNIIVPDSSFKALFLYQFLIFYFTLQKIYFHTKMFSSYIQI IYSAYGFFHY

>E4YJ18\_OIKDI

MKKLVSIIYYSWIVLLYSCLLQSRARNRYSRDLTKSGRDNSEGLNYFLFEKIYLVPLFLQLL  
 CQFLFPKRCRDFMALGSIILAVLVQFRTIILIASWLVFFLQAEAKLIRAIALLSISFTGYLKSFG  
 KIRRIFFWSGAERWSGSREKRWSGAERWSGNLAKF

>E4YJ2\_OIKDI

MLLLVLLSLIETGQVAALRFPIILFTTTPPIFSQQDDSLMNYVKNQDVNTFCKNSDSNGADLEDNDFV  
 PIVPGIIRMLDENLNLMDRDFQALSLLDVSKIAKEFLAKFDTWCIELVHVPLPPDQYEGSSVNWDFSH  
 GGVMKLRSIGINPQVDRLIAMNIFKDFMLSFGPLETMKPGLEKRLKMMNFTELQNLPIPKDDDELSS  
 SLCENQIVPFIQIFQKLLIPLDDMTDAFRGNENLLSIGKMFQFYRFLFEKFLFHEKICKMAYNNALPMV  
 VDVGMRQRMASDSESTTELTYITNTSCFVGEFVKTLPPSDEEELIDDMKRMKMAVIMVKLAPKMI  
 TMKSIIEIMGGIPNPNPYEEKSEIGYLIANISNVVLFAPDEVIEFFTSQLATELSLSIEMLDNDSCAETP  
 SGLMGKELGISAHGKFLTLNIFVLLISLKIII

>E4YJ8\_OIKDI

MVPTYHLNVPDFVADKRHPNLKIYDEEFQPESSSKSAQPMTSRVSYTIQEVFVFEKPEFAKRAVE  
 IFNEQKWSRFLPMKTEKLNKAFRIKNSERARIPSTSDIEKCDSIWKFFDVKNPPDRAVQRAIYQES  
 LPVLEDHVKRAENGDPYKLEKINTDLANGQNLHAAIVFAKLLQIHTSFDLSSSQSETNIAFLT IHE  
 TKDLRELLQKQAVVQVLEGKEQFVRRSDLEKILSRQDLE

>E4YJ9\_OIKDI

MSRKEFTSASLADIKDMLATPDDGRFREYIRNLNDYDPFSESYPPENRDFYQILGVSRTASIDEINDAST  
 AFNDPQKSRKEKHEIVTALYALKTPGVRIYDQMGELGLIGYKLLSQLGGRHVDDDEHGTMGDLKLFQ  
 LMNIMKHSESQMP

>E4YJK2\_OIKDI

MDGVDSFYEEVDDYYGSLNFFTNEPKDNRDSSRIYHYSSLVWKDTSKLGIGIAKFTGYPAKNKIKQHYV  
 VVYRYSSAGNIKGSFGRKVAFPKSLDLRRIITDHKAMQNTLLAEEQLKDGFLSERGIKQWQIKGMKVF  
 NWIREKQFLPPVLDLDCKNREFEYVYSHSLSTSSQQTDEQLEVFVEDFLKNHGSVLSLSDKKGGFYR  
 LRFSKIGFYVERTENKTKITYRLK





MKSIATLSALAAVGAQYPPPSLTPSGDSWTLWSEWGSNSIDIADFCAPDNYLANSVRYRECRLPDDE  
VHSWNAADTANTVQPPQGDPAMLDFTGIPTAWTQGIEREQSSPSTRIACDPRLDDYMDNPPPGMPVYAD  
VRDLEVAIATDPDMFQSYIPAPYKRIVFEFALCINVHKCPRPLWSSWNCHCLGTGQANNNDNLPLCNCGN  
GQTKRSRVQLCKDWDRDSDVTCESVGESIANNPILGTTEFPNRCINTINTQVWTQEFYGNQAPKNWYQQI  
LMGDSNSGWIQKNDAGHDDNLENTYQLSRNGQYSYTFNPNDFSTSSGYINQCFDNSRFSSTLSGYVD  
QFLMNYNDVRQDVEYGYQEMMCQSVEAAWSNWGAWGRCSCAGGITRRSRSCVSGVVVDVLAGDEGCG  
CPGSSFEDLACNTFCCPVWQICTGDDCGNDDWTPLTAAADGAFAGACPECGDTTLELTRHCKCQEADGR  
FRFGDLTTPAFSTTFANFQHDCVLADGETVENSFAGVPYIAKTSKVCDCGPCCEGWQPWSEWGACDDSCFD  
SNNGALDAPAAARTQTRNRSCGCDGTTEVATDFSNCPSLDGLSFLPAETETRACVATPSPCAYWAEWGAY  
SACSATCRAVLYDGTAAVGARCNADPLDAGGLQVRERGCNFGDVGAAGCEAGRTEQACVLSGCCQYDQ  
WSLWSQCLTDVGESCSANGQPGKRTRQRNTVCGDPLICDNCNHVEDCELKPCPTWADWGMWSECSMSCGP  
GTKSRTRDCCGDVIGSDACPCNGDFNSAVSQCDFGGNTCSNFYTTGTQLDLWNARVNAGAHDATDMGYID  
IMSCEVKQVCPYLQKMENSNELMWTEWSTCSTSCNGVERRQVVCNHGTLGVDPECSGLIHEDRPCSHLP  
CPRVTEWQMWSDSVTCGMDGERYRVRLCEKANVTSDCIEPLDETVCVARPCPMLTNWSQWTTCSSEC  
DTRLGVTVRERTCEHGMIGEDGCDESAYQSQFCNQDKPCPSWGAWSSWTACSEVSQNIFAHSRTRNCENG  
ALGSRECPVDGADQDAPCDTEFCAQTNIGTSENDVYIPRGSATGLLISFTSVVIALFL

>E4YJL1\_OIKDI

MEVESGIINFYQFVEIAEREPEKLTGAARKKKKIPRDRFRQRLVDLRRRMDEQKIIPPEKMAIYEKIFD  
DYKQICDCYIKLENSDAFELKVAPDPNFVQAPPPEPKNRRGRRKKQTRNEDEIILIEDDTPPEVKTR  
KPPKERAPYEKVKRKYTKKTEEQLKKELDSSLEKMTIKNDIPEERKDDNSQYSDYGEILARNSFGLLI

>E4YJM3\_OIKDI

MESPLQLSVCSLGWFFLRRAMSDCGKFDKLEKKRTETINLAVSVFHSFFSGIGALIAITRMPEILEDM  
VYAHSNLSACVTSFTFGYFVYDFDILLAASRWSISKNNFDIILHHVLVICCFGSCVVQQRVMGLSMLSIL  
MEVNSVFLHLRKISRNFDIRSGIVYHAIVALNFLTIAFRIAVSYKMIVWLSTVDVRSIPTVVFYLVGIVA  
MPVIAAMNCTLFYRCLRVDILRPLSRPIKDD

>E4YJN5\_OIKDI

MSILWIYVEANEIVNILTSFGVFWNVNTTIMGILILAPANSIGDFVADFGLSKIGKVETAMGAIYAGPLM  
NVLIGVGLGCTIANLTNGRPVPLELTAIELSMAAAVELSLFMGIGVLWYNFRFPKWVGPVVASYLAVL  
VITIVADTEVVESDPRMVCTAKRTDRVMVNFDFGCENFGVVKWLWEMCAFIVSLPSSPKLPTAVAASISY  
FQRR

>E4YJP6\_OIKDI

METEESSIGVQTIKLFGESVGITSIPEDAARHVAENLKFQLKRIIQDSAKFMRNAKRARLSPRDVSALR  
ARRIEPLYGFTSTDYLPWRFASGGGRELHFNEDREIDLQKFLENTASKLPPPIKIRAHVLVIDGVQPNIP  
ENPAPARKPPHDLSAKKLPEDLGKEDKGDKKNEKPGDKGQTQALEQKPLMRHELSEQMKYYQEITQA  
AVGRNEEIRKEALNSLAEDTGIHAMPLRFTNFISEGICKNINENNLALIYLMRMVKALLDNPTLSLDMY  
LHEIIPVVIVSCVSRQLCQRIGENHWALRQYAARVLAQISKNFTTTTSMQTRIVQSLQKPLDRRDAALA  
QIYGSIVLSELGSDVTKKIIPRLPKISERIENLQNDLQSDPIHSDGLEHILDQVRKRICPEMPSTHQP  
DGVLEVDTLITTEFGPYLGEKMYKRLGAIEMR

>E4YJP7\_OIKDI

MVLHKGAWRDALPKTRSTPFQKKYIALILFIIISGAILYGQSEAEINSIAEINYKNVVEDLDIAKLSKTD  
 RKSLAKLLDEPELQEI ESWGEEFEDAIDDQEIFNEEVLEEEVEDESELSKEMMEDSDLDFALDLSHEE  
 VAYRFKIRKRIFDEECNLLNSPGPISTENLNFTLSSVTQVFYDDKYKVMCAAPKAATTNWQKMMAVLKY  
 DGIYDTHFRKSNVYNQLPRFSQLSLEHGEEEGKSFYK

>E4YJP9\_OIKDI

MVDVKHVEEMILEDVEAHRDFINAAKVVVFLVQWISAGAMVFGGVVPIPYRTIARSGNTDGFSPMVC  
 FVLLMANSLRILFWFGKHFELPLLAQSFIMVIAMIAMVELCARVRSKQETATKEHNFLDFDLRYFWRWSR  
 FSDFMQCILAIWLTLSYVTWFLGFAWYVETLGLAVFIEAMIGAPQFLKNYQNKSTLGMVHMLMWT  
 GDCFKTMYFILNSAPPQFWICGLIQIGVDVSIQAQVWYYSIPKYTISYSKPRLAA

>E4YJQ5\_OIKDI

MKYENLEGKKKFFVPGGSFLAIMRVFQMLVGLAWFLPGIIMENPQANPFFGSSVFYTFIISGVIALL  
 PCFKILSVVWPISAGPESMVCFIAGFFSFLSGIAICIGQNDVQSYVLKIALVLNVIHSTILYGTVPVIC  
 SQSAFRFFFLSGADLETMQALNNMEARDRYERDMEHASIVKNEYEVSEGNNGQSLSFTPKGFKKVVTSEP  
 IFEDMNE

>E4YJR1\_OIKDI

MKLSVAVISAALAARVPAERRLAKINEKASELLDYANDSSASNKQKAALKKRVDRLLSQLDKIDTSACP  
 APGVDEDRFTVDEDFGLCDGSGKIPSMRSYARKFGCEAGYPNKKFLDRFINKSHKLRARKAGKCPG  
 SDPAPVDPTSGPTGTPVTNPIADLCGENKYADCYDLTSGEIFYFENQWTCRNCFRVKATYQNTNFNAQF  
 NAARVSCDDPCDGRDNCNLDVSCPIPEWSNIGTVNGDAIYTASVDVFCCHKSSGHNWQSVHMTRGTS  
 RDQFGDRYFTVWQHADGRLKLNQPMKGNDFDEVEYYVDCEDKTWTTIMISQEQEIDENMLELTMQDGEAL  
 GSNIINAVNAYS GPIVYASNPYHPPATLKFVRNFWHESEPYVAPPCVPVDPCLGLDSCETYINNCMVAP  
 FAGNQVATTTGFQFRISAIEVRCRDRVAPTWENVLHVNTGTSRQNFQDRYFTIWKKHAPANNEIRIVAPV  
 FDNAYHELNGYVNCCEEGWHSVAVQQTEFDNQQMNVEILFDGEVIESQLVRKQDLFNGSLNVEVASNFGWP  
 AASDHVVRNFIQDLTCPNPCSGEENCETFVDACEINPSAENQISTIHASVNFKASIDIQCNHDMDFGAW  
 RNIFHMSAGGEHGNPDRFFAAWRQPNQDLYFGLGVPEGSYAHKTVDCADGRWNTYSLEQRQDPDAPH  
 MVKLIFSKNDNELASYNYETA AVFTGSVDVFSREDNDGNVASFVSRNFFYQSFYMPPI SCDMSSAVD  
 PCDGLDDCTTFVDSYVNERQHNFSGIEATKNFRSSIDIQCNHMDFGDLNIFHMSAGGEHGNPDRF  
 FAWRKPNQDLYFGLGVPEGSYVHHKTLCEVDGEWNTYVLEQKQDPDAPAVVSLTFSMDGDDIASNYE  
 SDTVLVDTNIDAFVSRSDSVNNVAFKQVRNFFHQTFADVPEPCVSAIDPCDGKTDCTTFVNSCSVNPA  
 ASNNVGTIEATTNFRTSIDIQCNHNLAFGNWRNIFHMSGGGEHGNPDRFFAAWRPNQDLYFALGYPE  
 GSYAHKNEVCVDGEWNRVLEQRQDSKAPGMATLTFSDMGAEVASDYASDDVLVDMNIDAFISRENSI  
 NKVGFQFDVRNFFHQSYDDVTEEECVGTNTPCDGKSSCTTFVNSCAANPSSANNLGTIEATVNFRTSIDI  
 QCNHMAFGNWRNIFHMSGGGEHGNPDRFFAAWRPNDRHLYFALGVPVSSYAQHKNVECIDGEWNTYV  
 LEQRQDAETVTLKFSVDGNEISSDNYPNDVLDTNIDAFSSRESNKNVAVQFEVRNFFHEDLS

>E4YJR2\_OIKDI

MNRLSRVAVVGAGAGGLCTASRFKQLGVEKIKIFESASRLGGTWRYVDDPKDDPCSSMYKNLLTNLPTKV  
 MNFPDFPPKNTDAFSPHTVILKYLEEYARRQNLNESINFDNPVETCSFDESTKSWKVNDENFDVFFVAN  
 GHYTKPSVPEIFQNSVFEGEIMHTHYRKAESLAGKNVLVIGQGSPGQDISLDDLGIANSVALLGRSEIK  
 GTPDSLRFKIGWAKEMKANGIFTNNNELIECDYILLASGYCFDFPFLDKNLEYSACKKKIQPLYKQIVH  
 SRYPSLAFIGIPCTIVPFPLMDCQGFQTAYSSAYVF

>E4YJR5\_OIKDI

MDRRLAFSNLQFLLSLSFWKLGLLWVASIKQMRFCRAQISKLLVSKRTTCLDAFSPSSDYFQFQTSE

>E4YJR7\_OIKDI

MTSKEDILKELPADVLSAKVSAEDLLKFSPLVQQEQKHLQRQRQSAGEVEYDDRPKTGIFEYAKKNPFA  
 IGGIFGAVYCFCKGVSNTHQQGSKADMKWMQGRLYWQSFAIVSMLGGHYYSMKHMEKLEVKRAQYERE  
 RDIVCKNAHISPEVYEEMKYRESVERNYGGNDMIPLQELKRRKQVDQDFAERGETVYLSPEKRIAIESS  
 IGASLSSTDFMRLGIRSPSS

>E4YJR8\_OIKDI

MAGTPTSNGERALHRSPEHPPRSHQPRLWQAQRLRHDHRSRCSVFSRLRRDLLLVHRWRVHRQGRHRRL  
 GLS

>E4YJT4\_OIKDI

MKIAAGSLLSLLGLVLAEQAYWDDNPGFLKRSHSLIPPHSGNLPWLKGDGMTATSEYIRLTPDQQSKTGG  
 LWSRVPITFPWWELQLAYKIHGSGKSIADGLGMFIKERGKFGSALGGPSQFTGFAAFMDSYKNGQTTG  
 NFPQISGFVNDGWSYNHDNDGADQNIQKCLSGHRNKKDSSLLRIRYFEDRLTVKVPDGTGDFKKTCE  
 VDGVKLPTGLYVGFSTATGDLTDNHDVVSFKIWQLDSKTDAGKRHEMKPEVLNAPKEAVKESSSGGW  
 GFFTFLVLIIGGGVGFYYYQEREKASAKRFY

>E4YJT6\_OIKDI

MSPGGDDSSVKVAIRIRPQLAREQIEGSRICFVTTGEPQITLGKDKQFTYDCVCDLNSQEEVYSGTVK  
 NLVEGCFDGFNATVIAYGQTGAGKTHMTGTGFELNTQSEQEGMIPRALRQIFNGVQSRQAQAIKEDSIKP  
 EFYITVQFMEIYNEDIHDLFNPEGSDKIRIHEKEGAIVVDGLKALDIKSYEDTMRLLTGALNRTTASTK  
 MNTQSSRSHAVFTLNKQTRAAPCNPDEKENAKKIDLETVSSKFHFVDLAGSERLKRTGATGDRAKEGIS  
 INQGLLALGNVISALGDASQKRKHVPYRDSKITRLLQDSLGGNSRTIMIACISPSDSDFMETLNTLYAN  
 RARNIQNKITQNQDSSSKQLALLRQLSQALSELALFKTNGGGDSSSSVDIAGYNDMFQENYLLQEEIKK  
 LKEKIRELQDVTDRQKERLIEKAMQMNVDSTDEEGRKVVADYLAQIEDLKNRLTQAEIRNARPRIGSAR  
 ETATLNTQNTGSDTFSLSFLNYKLDPKNRIQKSSLNGQNTLSFVKLETFCFKQALSCPRETRTMMKMSS  
 MRNEIDLKEQLVMQLEATMANLENQRKKYENQLSILETKIQEAERDLAMAKQKNKTDKDPKSKEKIRE  
 MEQKLSLLRTDLKQLQQQKIENEKLSRREEAKSRELSDAKNKLQDMKRQKVDLICKMRDEAKLFREKEMK  
 TQKELHKLKSMRLTETNAANMKQKSTEDKLRSEKAVNELKLQEREQKYKIHKTHVRLFCRQSTPP  
 LSPSLKNVNAASKNALPTKSPRNLRRQPGNIRPQTRSASFNMWSHTQQKIRSAIAAKETQKDVENE  
 LEKLLAERKALEDDKACSKTDLTNKPLQVDVENASRSQLIYLINQMPFFVSPANANINQEKQMTANYQK  
 VQNELDSKESAFAMQQLISHLMDKKTSEPLPTPTTSKKKRTTSLSSALGLTPSIETGDESTDRTP  
 SPTSTISSNETVSSKDTSSSSKLSRFGSVFSRSFSSKVSVERSATGKFLPSHSPEVNDNTVGLKCTHAL  
 VGHQKSIITIVASGEFLTSGRDKLIKMWDLVDDKEILQYQMPSAVELLAFDAKMRVLYTVDGGKISAWD  
 TETGSEKPLKVITESKSIQFVEIDECGRLWVAVDKTVKCYVNYSDTGIRCASPSEITALSVRTVSELEVA  
 VAVGGRDNSTRIFRHSFELPADSISPKITLSPHLDVTAIVQFPDFIITGSRDNLKLVSSIGDLIKTFS  
 MAHADWILSMKTIIPGRDAFVSIARDGSLAIWSTRLEKIGHITAPDAVAVRSIGTSRTHVFTGSPVKKSGK  
 SWLICF

>E4YJT8\_OIKDI

MLISGERIREIAARELERHVQDPDFKSVLKELVQQVEDAIKDDDLWILEIVKQLEEIQIIQQNQFYGERA  
 NLFRRQTVFLKKEYEKHENLLSREQSQVENXXXXXXXXXXXXXXXXXXXXXXXXXXXXXXXXXXXXXXXXXXXX  
 XXXXXXXXXXXXXXXXXXXXXXXXXXXXXXXXXXXXXXXXXXXXXXXAQRPGPARTGHFQCPRKF

>E4YJU5\_OIKDI

MTSYAYVPICLYRLSITTTGTGTESDVAAESFARNDVCHFPREPKYGSRNFRISRICLHQLGLIWIISRGL  
 RVNILLLLQLRNTAPSQATSSN

>E4YJU7\_OIKDI

MTIKLKKLFWLRKGGAKEQETADITKSDPAKSEELVLCSLPVHAQFTISPSLSRAPSLSAVQNNAAALH  
 TSAPRKRVMRHTSDVSHRHRTARHFDFIKTRLEELHELAELDRHPIVSPRTRPGRTGLLKFAKTSHLTNT  
 RCSSMLDLRLPQVPSSPLIPLWKRSDPDLSGDAESGFSETSETSDNISGQRIQPPLKNLLSFFGLY

>E4YJV5\_OIKDI

MGKGPCKTKGKIKLQDGFIDGTGNKIAVNGEMMELPSAPRATTLEIDVSLPSRPPFTATVANLVYEIHE  
 DDLEKFFEDIDHISRISIPREEDDGDGRFNGVAVYTVDGRDACIGSMAKIMAKNDLMLAGRRAKIEI  
 YDEFGSRGSRGDRGERYGDRGGGDRERDPGFRSDDADDWRRPAAAPSNDDRGSYGGDRYGSRGDR  
 YGGGDRYGGDRYGGDRRGYDRGGGDRDRDRGGYDRGGGDRDRDRGGYDRGGGDRDRDRGGYG  
 DRDRGYGRDDRDRGYGSRFSSAADDDNQWRRAEPEIPRRDPREIRRDPREPKLQSKRSVNEGSNST  
 SSASSIFGSAKPIDTTKEREIEEKLSKLSVDDNRGPRRDRNYSGRKYDRNPSLTAGEKTRIAEELK  
 KQVESEKTNINQEGDHNEELGAVSRFAALEDE

>E4YJV8\_OIKDI

MSGTTDRNQDDAVNQLQKYADPPRADFANLLGVNPDGGYSHTASVSGIQESDYPSIPATDSVPLLAQKK  
 RVPLPAELIEQFGHMQTDWKLGFTEIQRWLITADIFIWYETGEDLAYYDGLSEPIITCALVKPVKQ  
 IFRDVKHILVVATAMEIILLGVCFNNDNTEELNIIPDPLYTVSTDNIRFQSIITGDDGRIFLAGKDGCL  
 HEVAYTNDTGWFRKCRRIHSSSSIGYLIPSVVQNVLFEDDRLSHLLVDRKRTIWTLSEKGSISLYDL  
 GKNAGMAKVASLSVSSIVNAATRAAPQFDKSVFSPIVAVSTIDAGSSQAIHFVAVTESGLRYYSAGSK  
 ERPHHLLLAHVRLPPGFTSSAELKPRKVHSALLTGEVSLCSEETGLEADQMWSLIGISNGSANMPEEY  
 GVNRLDCRVWSCASISDIDDPLVPETGTLGLAPHRDVCAYVQPSSEFVVMTKQGTSLYESLPSALQLLN  
 ILKRSGGMESAELERFMITRQSAEGTASAIQLACDGAIDHVTSTWATGAYLRYGGAPTRGGAGAATANG  
 GITGAPLSPMANRAASPNASSFFSPIRGNHNTGNQFVQSTPFGQRSFGLPTPTQPNMNSTQLQPGPAGDI  
 SVVNSAKFRGLVKYLTRVLRPIWLYPITSKPDPAIKQLPHTTRLDSVSLARVL TALKKLSWMSNNGT  
 VPSSVATASDIPSYENAQFSSVYALVCRSLEVAALWHLLENQLHVVS KDLSINDKEMLDVLFKDLVTT  
 EVGRVLCQNLITALLSCYIGDNASIDFVSRSLRDI CPTLFSADDAICSRATEILALTRNATDQEAKEKCN  
 EALSLYLTI AHTANLGAVVPQLKMAQYWEIVTLCITAADKRDPGSMALHFFKQDCPEDDLEGKRAYSVR  
 RDCYESCLSVIKELVESAKHITSTPSLPI SPGKKPQSRKENKNETIAEEAARAAD EMLVQI INSEDELPH  
 IAVFDWMMQSKLSDRLLSVKSGFLENYLLQTVKSTPDNILAADMLWKYYEQMQQHGSAAARTLMDLAQNAP  
 GLKLSTRLEYLSRAVIDAGAIMGPTAADEQLRRDAQEAAEVAGIQHLIQVQTRDNLLDDRLFDLNKLYQD  
 YADPLDLPEVKLAIIVHSAGQYDEATVDGFWQEIIEKEVEQSKDLSPAQVAAIRAKVLSVGQRYSASGRF  
 LPKLFIIINFLEKVS CFMQWPNKGVVAVFKDVGVSMLNILEAYFEI IQDGDFFWAQNGQPLHLIDVLKVI  
 FETFLERPNNVVPNERRLFVVKCLQIIASANVTLGGMNADTSLAMNNLKQVQYRLERWLQ

>E4YJW4\_OIKDI

MLIVPPLMLENISIVINESVEDPRAPFSSDMRRSGRRLDMALLVLTQLSPCIVERSMKVESMSVSPEPS  
PESKSERR

>E4YJX2\_OIKDI

MGESSGHFAKKSTKHVKELITKLTNCMDGIITKHNHQHPGKMIALDCQMKNWRNLSFELKEMQQVWATLN  
FAYNLLHNEDGVVSRGPTQNAPRAEMFLSNPPPAEINKNSAEIKADFDMADVADYAKAVKLEGVDDGYD  
LDNLDMRDRVYDSESDKAPLGGQLFGDVKLYETSDSDSSMDVGGQSYNNAGPSIVAGPSRKTDFAKKTKN  
LKKKSAKDDSSKTRKLDLDFSPKQSKKTSQKKQTPEPVYDEDMSDDDEPLSRLVSEVNATSDVIIPVVRQ  
SLRRALEISKSTDPKSKKRGGRKASSKKRSLKSSVENQSSDDEEAALVRKAPKTASKRSADYDHD  
VEDSPKKTSMVMTKKKEKISRVSKTSSGKVSRRVAVSGMKKESAQKDRNETNEDKKAKKSGKTKDDNQE  
IVPAKEKAGKGPWSKTKERKTPIHILDRRKEEYHKKLAKQNALANGAHQKNAKEDERAQKQEEELERQ  
AEAIALKNSKIYKPPSSIVGSNQSNSKPAVQEQFVTLVPAVSAVPLSSGVLSPKTRKTPPHILQNK  
KEYYQSNKEEILKKQREYKQRSLQKKKADSQSPDDSDSDKSSDEGNSRPGSPERSSSSKRKNEGKH  
MMPKRWTEELTTSKNGDSNVQNFIPIQIIPSMPTFELTPVEPVECVAPTQGGSDGASRKKVKGNTGSDS  
NLGSKDSSVLKSDGSGRIAVKVMNSRLCAQPDLYHEEPEAPPSPSANDPADIVGSTNGSTTPQNQSSE  
AGHKPNFKKFVQDWENSLNGPNDNLKSDAPSSEEKPSHKEAYTPKNATNMDSASL

>E4YJX6\_OIKDI

MSPNAAESVVKSDSPNAEVKFDHPNCQLCTSKNLPYLFKIRHVDTPAKEFYSLRLMKLIAEDALALM  
ADKEVDIPTPCGTWRGVAADPESEAFVSVIRAGDSMLQAVRELVPVIPAKILIQRDETTEKTPVLYY  
KKWPKNVANKTALICDPLATGGSVIMAIKSLLEIGIPEEKMIFVNVISCEPLNRLGREYPSVKIVTGM  
VDPMLNSERFIVPGLGDYGRFFGTVE

>E4YJY0\_OIKDI

MAETLDRAESDPDDIFASAVLAANFSDEENDDQSESESDGLLDQSFSIVQDFQTENFSNEERNFCFDS  
EEISLDDYFHSANFEYFESGTYSRLTIAEEDDEELSREREEENSKRKNPRMERKSSSDEQRKKISNANL  
LESMLNDLDDTCEIQFQDEEEFFEAETKILAEIIVADTINFAIKLIAAEIKEAQIAKRLEECRAEISSE  
KLVRPSEVRKSRYSKTSKSKKIENKEEPPKLSKMPIGETEKKPENEQSKVINLSSDISVEETFEHHR  
IDDLEIQNQFKDETEIPDSPPLEASQNVKNDKLEIQSQNISDNDNIPKPEESKPEKVQEIAPAKPAKDS  
KIDKSNQSSQKDPPIAQAQVPAPKSTPTKQEKVETNSTKLDCASISKSSAAGSSFTKSQRKRSFPRFPK  
KRRGSLKESLFCIMPVKVDTEDASITSLKSAIPKSSRYEEKSSCQIM

>E4YJY9\_OIKDI

MRRNSRILLFGIIFWFSGVLYVRNSENTSGVFNAESNPRHGNRISKDAPVHHKDHKQKIKLVEDHNL  
DADKLEHDIQDIEHGLEDLKDSNDDEFAAIEDSIRHDLADDDDKDYADMEALSEEDKDDENDAAKKESKA  
KAEPTGDSKINKEIAEGMEDVEFEQDELQGPTEKTIQDKDELDKGENDEYEDDGKVDWWWNFDD SAYLA  
AGALGADEDPYEANKFNQAASDRIKSDRAVPDTRHKECSKQKYQVEQLPDTTVIITYHNEAHSLLRTVI  
SVLHRSPNLIKELIIVDDFSKNPNIGPLTKIKKVKAIRNPKREGLIRSRVGAATATGKVLTFLDHSHV  
EANEGWLEPLLGRIHESRTAVVSPIIDVIGMDDFHVYGASADLKGGFNWDLVFKWYDYMSEQERRERRRAP  
TSPIRTPMIAGGLFSDKNWFHELGEYDMMDVWGGENLEISFRVWQCHGTLEIIPCSRVGHVFRKHPY  
TFPGGSGNVFAKNTRRAAEVWMEYKEFYFAAVPSAKMVKFGDISKRTEVRERLQCKSFSWFLENVYPEL  
RIPNKDAIGWAVSQTNGLEECIGNTHGGTLMYRCHGDGGNQEFTLTKEGKEFRHNDLCIGYNAKEP  
VGNPVKNTCHQMSHRWEYFSSQIKPEGHTNCLDSKNHLEKGLTLEVCNHSKTQVFSFEMRNIK

>E4YJZ1\_OIKDI

MTSIA SRVRIVQGDITKLTDAIVNAANRSLGGGGVDGA IHRAAGPELFKECRTIKGCKTGDAKITHGY  
 NLPATWIIHTVGNL NAGDDKEKLRDAYQNSLNLAIDTKEIKTIAFPCISTGIYGYQEEAAHIALEVTR  
 KTLKEYEILEEVIFCVFLDSDREIYERLKPVYFPDDEKIRQNQIEDSGDDLILPEVPTKKRKEEKTAETIQ  
 EEETLTKADVLLKTVVNYEL

>E4YJZ5\_OIKDI

MEIFKEEIKAKHEAAEALKAKQKEKAKLTGIPVDYNPNFNAQAISDQGDPHSTNIFIASLSNRCTEEDVT  
 HYFGRFGPLVSVKIMYPRTQEEKFKDRNCAFVAYCCRND AERAMSKLQNNDFKGVDLKLGWKAVPNIQL  
 QSPLYVDPRLKWLTPPKQSNLPLNAQPPDLINSQSEELHKCTVRVVIPNDAALTRLINRTVEFVIKQ  
 GPMFEAMLMDKESNNPMFQFLYDYQCPAHSYYRWRLYSILNGESFTFWRTNRFKLYLDGPWWKPPILPFI  
 QHGMPDSDDEDDFDVHEQAENKPGNEFDSALNTVTPVRDLVGDLMALCIDQVDHAEITDAILEAVLDEC  
 TLDQRLGRIFLISDILYNGSAAPKASRYRILFDQHLETIFEKLVVQKEIKTAFVADQFKNRIKTLFQAW  
 TAWSLFTNETLIKLNIFNGIEEEKNESNGSSDSVDVGKEIDEKRARVSSEEHREQEASDEDEVDGVPL  
 DGEPLAQASTASEPPNNSAHNPSQPAKPAGVGSFVASKWEVVDDDDVKNEAVTSAEIFAETKKMEQEKK  
 RNNDYEDKKEAKPEYLQSDAWRKAIRDIEVKVIEYCEQLKVLDDSVQAEAYRSLITKLSEKFKDDPSIW  
 EDSPRSPTAKKSKDRRDGEKQKRKKRSRSDRRKRSRSDRRRRRRRR

>E4YJZ7\_OIKDI

MADQQFETTTAVVNTTTTTTTTTTTSKPTWTTTTKILARPPATQKPTAAPEPAKKNNNPNRFGIFQPT  
 CGKTPARASRFRITNGSTARQGDHPWMVALAYKKSVCGGTITMTPKLIITAAHCIGDPRRADGVDDVP  
 DEMYDNIQVRNARSYYIHPEYNSISDEHDI AVLLELDEPLTLDYVQPACLPDGEPRVNEYCEVAGWSST  
 PDNAHQDREHQSDNWLQMFELGTSYPHLP SWGFLEESKQTGNELKSGFLQIISQLECKKYENDDITG  
 NMFCA GSDRGVDTCLGDSGGPLVCHNPASQRWEITGVTSWGRGCGVEEFPVYTKVVQYLGWFAQIEAGK  
 GTPSRVDHLQFDNDDNNENDIFDYEASGDDLSADFYKCGFTIEPEIPHNGIPASGVITSPNFPKYSN  
 EKCRWLIIPAGFHVELKFTNFKVEYDSSCRKDRVEIHHDGQGFLLCGNGIPEDTFTTTEKQMEIYFSSN  
 KLINFGSFAIYTIKQNMQNGDISASFERADNGVVVSEADGINGICGKPLIQPDRMVRMLGGQPIKPTQ  
 WPWLGMILLEEDGEYIHMKCGVALICRQWAITSGDCARELKYGEKYVHKVKFGNMRWDEQSKHQEELFIDQ  
 IIEHPLFNGGYDYDIALVKFARKV SFNNYIKPICMKDYVHKNGGFNCF AAGWGMNSQTMSTRQAHSKI  
 NIVNDGYCSNIYRKYNTQMVCTGGDNRPCQGGGAPLICNADNGEWFHGISIYGP GCNKPGGGSV  
 VKPSVFLTFIEDATGGCVKSY

>E4YJZ9\_OIKDI

MNVLRAKSGLILRNFSRRTSNLANAKSTVTLWIDDHTLPGQKYIRRRPQEFSDGRGHVICTIGEFNCG  
 GVLGTGKHGVSVYWGPDNPLNYVDNLRFSPLGVTLSKYSWEEDRLALQYSRENMRAIKNAETA KFI  
 GIDCLTITLQNFKLINQFNSMEASGSLMHSFKYGMKNVVKTNWYHMLSLAGLVFLCRLEYQDAAARDLA  
 IKAANAGRFRPLSASQQIVSEEKLENNMREYLSQVAVNNGQDNIAQVRENVKKNRKYVVTQVSATEN  
 KSILLDHRRSVGLPEIPQHSFVEANVMDWAKLQSM AEDDYDEFDELEKIFVSERKGPESDEELLNTMK  
 YGVS IQDQINEANKKLQLHEGDLKAYKESTNQMMNENKQLIHELTVTNKQLHKQLASVLRGDEKVEAAL  
 GDHKSEKQALKTKAGKDVVNI IQKRLNAIRAQNDKKRRQLQELQTSKNLIEKDIKREEDNCRGTSENARQ  
 LRTIENRLDKALLKQREAEHVKAIEYKMLAKLKEGALMFPTILEEKEHQVEAQEELKRVQGM LAQASQ  
 RDRAKSQFHENEELQRERRERDRMLQELRQRAEEKRGADALERRTRMESRTGSTPGAVMDPVQNEALP  
 QNNLEEEIAKYEDIYRAIKEATGVSSIDEAVSRFESQGETSKHLQNLKEENEQKINGLKQQRIDLEAKFN  
 TFKYS DADEAAKIEEELFKMTQKTEENKHLHNEYQK KLERQNKLLNVRSGVQHLCDKLDFVEGTGETVK

PENPDVVADINSILERSGKQIDSLLQSLGEEGVEGAQERAGTDLTSWAITRVEETAPYSAIKSPGHHAAR  
APGDLSDGSSGEEDGQMLTREEIKKQADALVKARNKKRGRPVKQKGRR

>E4YK00\_OIKDI

MLLIGLAFIDLRTNFGSTFLCSPSRAQFLTGRYAFRYGLGSDPISFENPIGMSTKEKLLPEYLKEVGYET  
HAVGKWHLYGCNESFQPHNRGFDTLGHYGGVDYH THATQGALGSYLNHFLNGEPHIPEDGFEFASYAW  
SNRTRKVLRENTDKPNFVYLAFNAPHEKVAAPQDLIEEAKSMYPGIPGTRRLQLAAVKSIDVAMQSVIEE  
AKTLERETIVVFHTDNGGALLAYAGGFDGPRGCSYPYKGYKSVLAEGGTLSPWVYSTKRQFHSRYIDGM  
IHIMDFPPTILRWAGYDKMPRDLGDIDQYDLFENEAVTQIRDRFIYGLLHEWDDNLVWKTYYAVRYGD  
YKFMNYQSELIGNTQCPEGWLNKSHAKIYLLASLFPSA

>E4YK01\_OIKDI

MAPKNLETFLPDVSSPSIKQTSRVNYGKLPEDKNKQLKFI SDTHVQSFDWFLEEGLPNIPNSVAPYEFEM  
EANNQMRFRLEVEHIEVGGPTLESSIVCKDRRLFPSECRQKKTDTYAPVHVTFNLINLSSGESQVVTCK  
DLLQMPLMVMSSKCHLRGLSPEELVARKEDHFEIGGYFIASGNEKVI RLLNMNRTRRNPLGLRRNGWKR  
RREGYTDAGLMIRCMDNWERTSNMNVHVTKNEMEVVFIQKQLFHVPMMTVVRALTSWTDLEIYREFMQ  
TMSDEPNYDSAVKRMCLKLVKIQHHFLTQAKFLGQSFRIFDICPAWKS DVEAGQAFKRYCLIYLNDED  
KVRAFALMARKAFRISHNTCATDDIDSPESHVLLPGHLFQSMTLEFFESYQRSVSMIMAKEYSKQLEKG  
NDEVGQNMLSFAINKIGNMNQHFYLIATGNLKTNDGLGMQQLAGIVVGAEKINFARFYSHFRCIHRGAF  
FMEMRATSPRKLSTAAWGFICPVHTPDGPPCGLLNHLAHTVRINVKRENTAKLEELLEIGVKPCSIKAN  
EFDVPVIIDGKQIGWIANGWRAQAVEKYLRRLKTS SDRVPDTLEIVHCPAPENKGEAVMFPGINLLTEP  
ARMYRPLLNLREDKIEMIGIMEQVWLHVTVNQKESHELTEYQELYPAALLSELACMSPFSNMNAGARVIL  
QCQMAKQTFGWPSTYLNHRSDNKMYRILTPQEPLVRSHLHDSWGMDDYPLGTNVMIAVISYTYDLEDAT  
CVSKMSRERGMMYGTIYKTKMVDLQDTAQSMGYRGLRLGCRDRFDPNELKAYRKIAGDKLIDGLPFPG  
GIFTYQDAYYCYNEHEQKYSVGYDASHAEDAIVESVRVFTNKRPQEGGFQAAIQFRIARPINIGDKMA  
SRHGQKGCISRLWATDMPWTENGIVPDLIFNPHGFPSRMTVGMIEFIAGKAAMVNGRVYDSTPFVDFE  
NYTADEHFVKLEAGLNYHGYERMYSGISGEELEADIFFGPVYQRLRHMVYDKFQARADKGPIDPYTQ  
QPVKGRARGGVRMGEMERDGLISHGAAFICRDRLFHCSDFYKTRICTVCGSVLSVSKVKPDKTKDKNWK  
LMSGKWECRTCGPEAKTLLTDLPYVVKYLAELAGMNVKLDKFKAKEDKTARTEVL DIVEKFER

>E4YK05\_OIKDI

MKLFSAFISATLAARECGDYACIESIETVGCLDTCYEDDCHGTQMYCCGELAQNDWD AIIKFQSVTKAAA  
EAKNIDHNILAAIMSRESRAGRKLESWNGEYGPWGKCKNGSCYGWGLMQVDRRFHQPVGAWDSQEHLEQ  
ATQILIDQINCISRKFDRWTLPMKTKGGICAYNRGCSHVQNYDGM DIGTDGNDYANDSVCRGQWFKNRGF

>E4YK07\_OIKDI

MDRPALALDENTPGSDVTAETAALAAAALVLFKDDADYSNLCLSHAMDLFEFAELRGEYDENEAFATAR  
QFHPSSFEGLAWAALWLYYATGKRRIVILPIKLSLNSKPLKGNQYLTRAEDYIAEFLDLSAPTEFSA  
DDKTIAMVYHALLTSDQSAAGVQMIIDFCTSFQSQYNADGYLRMTDWHNFGATSGVAYICLYAANHVV  
GQTEADFVDFSKSLIIDVLGAGEQSYM TGYGHNPTRAHHRDSACP I GDCGWGMFEDKYTPNEFTLEGA  
IMGGPDATSGFWEDNRKDYTRNEPSLVANALFQATVAGIRERELYDEYPSQMILNSDPSGISLPTEDFSD  
FFSSWFPFGTNVVDYCNDKTCENDGICISDYTNFTFTCDCQDGYFGTRCDTITEPVVDFIRQWGHGGEI  
KLNLPSEPLGAWQVLEFPFGCALQSLDIWHGCM DYPYASSLSNSTFYVYQVGVHHDHQNIGIVFETDQT  
YDENSYWGNSASC FDESAYSLTLVARGSHEADNIEG MTLQWSTDPDKCPGELPWNPSPTDPAYPENIILG



GDEVIDQAFLLDMVNNYDGGPHVNGSLEVEVWVSGEEVGMRTIWLDPAMPPAENPWQLQIAFAEGCNVQT  
 VLTYQACINTVNSDLNTEANATNPYGENVANLLLYQNGTDLGTDFIGLRIKFPQADQMTCLDANSYVFNL  
 YEWNPIEASSLLDTCEIMYPDRDTQLALLGDSGAVYVPESSVPSMDFLSGPLSWTQGANGHFYLPNPKP  
 MAPFGLQVQPAGCNIQRINFWHACVVLANSNINSGYFELEQIGWQEEHGYIGFSVDFQPSQYSSDIPAS  
 CKDANLYTLTEDRSLDPMQGISWNGFYNDYADNCPQALGEALPYSSYEVQLRDGAVMRTSLSNQMSRL  
 GNDPFAGNAAGTGAATSNPGERPIYYSDRVSDGQLSQQAS IATWAKRYDAEAEKEEMREAERQAAKLA  
 FQIENGLIDAPRQIQNLQQSRNAGYNAGSGGLMSGGIESSLPSSSIPVQFETRSMDATSVELFWQHPA  
 GKREYKIEYKDWIYTVLQPCYITKRC

>E4YK08\_OIKDI

MGKCECKKGYSGDGFSCSDVNECLTGKSECDEHASCTNTIGSHVCTCPNGFIDYNGDGTTRCDDVNECDTI  
 RPRCHNLGQCVNYPGTYACECLPGYFGDGTSTCADVDECVQDNPCSDHAICTNSVGSVTCECKTGFTGDG  
 FTCKDINECETGEHNCTPLGGKCKWPKGGYCMCIDGFKGNGWKCEDINECEKEGVCHERAECFNEPFSF  
 RCKCGAGYRGDGVKLCVLDDECAAGMHKCDAAATCKNYVGTNRCKCAKGYKDLGSGFRGECQDIDECAFN  
 NQCTGKANINCNVPGGYRCKCKDGMIGDLRRGCKDQDECVAGTHECSPYAICTNTLGSHKACRAGFKG  
 DGLACEDINECATGNHNCNAKGSRCINIPGSFECQCAPGYSGNPKTGCDYVNECKNDDAVCPEDSSCLNI  
 LGSYKCNCPAGYQGDGANCIDINECEDGSHSCDAAAKCTNTIGDYECACPSGFTGDGFSCTDIDECATGS  
 HACGSHAVCVNFRGGYDCACPANFVKNVGCADAPDLCSPPCPGAECRNEHGTYVCACPSGFVSRAGVG  
 CVNIDECAQGLAGCHEHAICIDTDGSGFQCKCKSGYEGNGRDCSDIDECASSMGSDCDRNAKCKNVIGGHE  
 CTCKPGFIGDGLTCQLSDACLADENCRFPKVCIPLKKGGHECACDGGYFAPKNAPDTCVDIDECTMGTH  
 DCNDEETCENREGGFSCKCKEQFRSGGVCRERDECVLGLHDCDVNASCLNTGKGFKNCKDGYSGDGKT  
 CSDVDECVIGVMREMITPKKEIVDISGKKTETVLTAIARLVLSFQKIFYCAFQKTI SLRSACPGAECVN  
 TVGSYKCKCKEKFVLAGKCVDINECENGLHTCKNVGQKCVNTPGSFKVSFFSSDQLKCDIDDKVLPNAI  
 FDTAFAATREARTSALVQKDSRATARHALKSTSALKELTIVTNKRNPTRKEDLFALARTDSLALDRLVL  
 MKMNAEIRHFVASQICTVQTPLARTNVPKMSNCHPNAFICIGINDASCVCNAGFRNGFHCEDLDECG  
 LETHECHGNATCVNTPGDYDCSCPPEMVGDFDCQPSRACDNASCHTNAASGATDTAVPIATSVSMRRTT  
 AAARLLARTPSARTYAPAKMATKATASSARTQTARLEPTTVAKVRFVSTALEISSASASLVLTVMEEP  
 ALMSTNATHSSTIAPRSLVKIASEADIPANVQPATTAMDNLALILTNRRETTVRTRNASTLTVITPA  
 SVRMASAMESARTSARTSTNALLTFTIATRQQSARTRLDRSLARAWKNTKCFNTAEVRAQRNFNLTTL  
 FNNFKAYTCSCKAGYTNGFACSDVNECQISSPCPADSDCTNTVYGAYLCTCKTGFGAAGACQDENECVN  
 GRHTCESASLCTNTIGSFKCACDIFGFDGSGNGCVDINECAKQSCHPDATCTNLVGSYECACKDGFKNGM  
 LCMNIDECATGAHTCAASEKCEDTKGSFNVCVGVKCPPIGTFDLALLDNTVDIGDAGLSATKAFKEMIN  
 SFEVGASSAKVTVAGYSGEKVAPSVFLDSATSPKPTLLSKVDSINFSGRDLRIERALAFLVNFSLFLEAM  
 GRRPDKPGIAILTASKKTYASALDAVRRIRTDKSTRYITIGVGEASETEMASVSGNPQYVFEIASYDE  
 LPSLMPKIMDLICEIDAEFNQ

>E4YK13\_OIKDI

MRFTLARLNYKVAYLGKWNKVPGDYDGGKHILPPKITAKDRERSLKELVREARNEMWLVHRHQEAIRQNI  
 APRVSFQRPRNDEKRTYESQLTHDLALGPDVTFEDRFMNAQRGNQWTKPTHVKYPYLQQHLETGINPK  
 KLHSHYPVAVEKTLRWRDVKGFQK

>E4YK14\_OIKDI

MSQVNSPTFEKFFVASVYLVFIVGFTANMLVILVLLTHGSLKAPAGLYVLHLAVADSLLLISLPFAAD  
 NRLRGTWIFGRACKLMESMKLLNFFSSIFLLTLMVCRRVSYKWRQSVTNSICAGVWLVSLTVAPLVMY

SDIAYRDPEDNQNARCIVAFPDIMNQVNELEDFNGNVDFDDAHFYIADGDHGAVESHCLSNGSKVSSLFK  
 QLIKPLKQFRNYMIIITAVGFVIPLEIVTFCYANISISMAASQKKNKSDAKTKDVAGILKQMRKDEHRK  
 QKVSCLKGMPRRKVTVLVANLVISFVCCWLPFHFWHIVRLSGLDLSEHFFCAKIRDLTFWLVENQLRSI  
 DVFSLAYSNSVLNPLLYSFLGYGFRNKLIAALTRIKLCFRSRSPYRLSQQGNERRSQNMLEYL

>E4YK15\_OIKDI

MYEISCSMGCVLMSIVSGSGSSISSISSIMSSAEGVGRSKMSSEFAADISCDNSCFILEEYKMEEV  
 PVKKGGRPKKSDEKGRPKKSDSEEKIVASDSENSGEKRGPRKRTSAEKAAAKKAPKRKSSPKTATA  
 PKRKSVRERAEQKPVAKYQDESDDGEFEVEKLLDVEKQGRKGTKYLVRWVGFSSKHDSWEPKSLPKRK  
 INAFLLKQEHADPSSDEEENFEEENSSEDEVEVEKIVDEKLYGKTRYLVSWKGYNDHNTWQDVDSL  
 KSCKEALKEWELKKQKQEKKEKQEREKMQKKSEREEAKLAKAAERAANKADSA

>E4YK25\_OIKDI

MDRTERNRNSKLRDFYKQARENAELVRNPQFNLDSSQFQKNEYIDGVLQMPPLAALLQREREIGKEIST  
 LDQSMQSLVYDNYNFKIKATDTIKQMRVDFKIDIEKSMDLVSEMSEITKLSTSLNSKMKPCRTEVANLVE  
 QQETLTKMQFLFELPAELKRKIKEGDFESAVEDYIKANCVLKNYENHPSFKSIQEECELEYKELVAKLEE  
 PFSEKESSEELLIRCLLVLKLEDRSSSLADGFLKSRTIKVKHRDNTLKSFSSEISAILADICVNI TSF  
 KNVFHERNLNSSLAAQHAYQSLKRHVNDILEELTDDFSEILVTNDLSDQLSTSLDLWYSKLSATAQILP  
 ELNLTGRSEELVVSQAKIRHDSIRKTLFMKLEEEILKIEKSESPGATNAAILTLIRDSQHQLDKFFTMSK  
 SYSQIEYFLVWSDMAKTLKIDAVDHIASFQKTLTAHPALLFPLSALASIWSETTVDQCIERKDRQTV  
 NRLKISFSQICSAALKELVIRGCHCAELIYRSVMAKDWNASEPRGPRPIVKTFTDEIRKIDEECSKFM  
 RPGVRPAKSTRSGSMRIDTLSQRSTLNIQRLFTDKIEIYDTVQSTTISVTSGIIKIALKAMLESVRLKTF  
 SSYGLQQIQVDLSCLHHLWRYCEDESHMGTISDEILQSAALRALERELMEADVIELIVEKAQLA

>E4YK26\_OIKDI

MYTMNVEVPFESERHAEIALNSVIQDEEPRAGTHIERKITVEGNLLKIHWEAEQARILRTSAQSLQLLI  
 LVTQTIEQFDGME

>E4YK27\_OIKDI

MTEVKMADDPQYNNYLRIVYEKQALKKDLQDTYRQLHNNLANNSDPHEKAALEKVMDDINTTNELIFSQ  
 HKVEKIRETKESQMPQRAQTIEIHLHNGTCNVTSHEKTEIEEVCKMNNRFFSIDLSKSHLEMHTFDSTGK  
 KERKLLNWSEPPSSKYANSELWLKTTDEAYLKSVAANTHCFEVKRKSRKNCSICGGNFFSLPRKLWKCTYS  
 DPAKKKNCDLIVCTQCKENITKPCISVEDPIGIYKKEEENNDLDTWKASPEEVKDWNVPVGGTGWIVY  
 KAKWHGPVAVKELKCKNPTDEEVRIFENEVRMLRKRTRHEYIILFMAYICEPEKSKLAIMSWCESSLHKR  
 IHVRSEKMRLEAISIASQIAQGMGYLHSKTVGILHRDLKSANIFLQSDAKRSVKIGDFGLATTSARGS  
 SKGGSFRDKTLGSIWMAPELFRTPAPYSHESDMYAFGCVLYEIFAGEIPYAAKPHLRQEMIIFRVGAGL  
 MKPNLTRLNPREGEEKIVGAESCPEEIQKVMKECYERKPENRPFKFEVGDNNLVEMFNTLEASSENINRI  
 NQQQRAAERQVLRSLNTAQHSYYGSS

>E4YK38\_OIKDI

MANALLFCALMGQTSIVSRYKHGFVKPNDERALRIRGYEAAHGVMQIMPDCIAYGQSDEYSFVLRPDTT  
 VHGRRRQKLVSLAVSKFTAVYQFYWAHFFLETALLYPPAFDGRVLVYPSDKILRDYLAWRQVDCHINLY  
 NTTFHSLIQKGLTASESEKRLSKTLSKEKNEILFQLGINYNDEKIDFKKGSVLIGAENRKDRLLFNPGQ  
 ENEGEIDLWEAQSSSESKHLQKRQVLVHVDI IKDPFWQRYPNLLLPLNEVKKARKRQLQTDCKNNNEY

LFILVFYHALVVFILDFNIIRNLYGNLKHKNERTVCITVLPFRFLYLVSLSRNEPVSFTCRPVTGTIGDL  
 LEQIKEEDRGVDHAAIYAQGEIRLASATTISQLLTMGDFQLRINDIRHQIQLPDDQFSANQVCKMAAIKQ  
 LVHSLHSSLGIAEFQFQHKKLTAKRDEIMKKLKKCQLVKQKIDEDSIKFSQQMHAGAMIGMSVLWGIMA  
 RLTWWEYSWDVIEPVTFVTYGGAICCYTFYLATKTLPEYEHMTNRWQLLKTHKLSKRRRFSIEDYNLLS  
 HEYALVCEQIDRLEDELQYPPDKAALERFLGGGGGARSGARCSRSERQLSTGVDHIIANCNSKEKSKNKQ  
 SEVTMKLLATLLASSAVVNADFWDGAEEQNHSTWYSETNIGTFSSQNDPEMLEMAAEAAAAEIDFGGIQM  
 RGKRKKPKGFLIDQAWSYDLKAEFLQQIYPGVENDPDFQMNKAEIQKEDAKICSAGVDPVKGPVSCA  
 TDERMGLSAPMTPFQTAPRKFRQLKLMVIFLQKEPGFGKFCYYGCYCLPEGAHDLSGGGYGEPVDRIDRT  
 CKQFNQCYSAKLGNGKLEGTSEECIGEYTKYRFQMIEDEETGEKSILCRNKPGETCARHICECDKRMAED  
 LSRYEDDWDVYHTGRNNGEWNFADNCKKKGLGRYNKPETCCGDEFPMRPKQGGKECCGSQPWDPVTVQV  
 DRQCCSDGRVRPSGYC

>E4YK41\_OIKDI

MKLLTIIPILTKAQDIYYDYDGSGENYENSNVNARNRVSAGPTFDVTVKEIQEAKENLLEFEGSGMT  
 NKDLIGTFSFETGGYSYEDGQAI AELLDEYGRAKKPNANGAFGLFGNSKEEQEQERGKKNKNKSNKNQV  
 VGSYDNYQNYFQAQLKNEEDFSCWTCRSYWEKDGSTGDMYADCRTHGEMITCPKQKEDLGSDFSSANSC  
 QVTERRFFGIVTELHVCKQTRACQANFNQNMNGSVYGRSCRPESTFGISTCRQCCSASECYSDSTILA  
 ESFNTEAEWLDDTHHATLITV

>E4YK47\_OIKDI

MREFCILLVSFFESINSDSNYVVISGGKIGSEFTDEAFKILLQNNSHHGNIIRIEKSPYEFLPSKRAG  
 HKLALWHNIPMLTGGELYAAQRELKSSECYLKDTGQEIIKKDLDLIDEEVSQWQLLPDMNEGPRQYHSMV  
 VFRNSPYSGTAWVCGGELWKRAKASGLRLEVVASCECFNRYYMKWIVCPTMIFERKFASSASSYFGIYM  
 IGGEDKGRILSSVEYVEPLGGGKWRKSSLPKVKSAAVCIHDKLFLFGGFDGEKSI STVYHLNRTNW  
 VDFGNLLTRRFGHTVTAMQSTVLIYGGEDDGEFKSAEILNII SKTSGADILIF

>E4YK54\_OIKDI

MDAYFAHSMIEKEDFEKMEQYILDHVAEDFAAVRKNLKPTSIILEEATDKAYHEGAVLEHGCPVEIRKS  
 LEPLEKRLPDVVGIGFAKCGTGLQFLDCHPSVTMRSTEPKFYNSKNAFDIIQFDGEGTPEKYDYLLKIE  
 ITAGKDKQKFLKFTKTVLTVNPKKQYAGSAAALDVAKAMKILNPKTKIIGIACDPKRVYSQFAMKNRRT  
 FKTTDGMDEEAHCKACLNKDLNETIKDFTENAQRLLDNGGNSPGFDEYARALEPFVEQFGDENVLLLD  
 GENLITQPNQEWARLLEFLGLNKESMKFYIDEEKGFPCLEKPVKYCLNGAKGTSRKIDVRQEYPEDTAIW  
 RKSFSPIKEMILFKKICNKIDEKCCQKLRDEKSSFSWAHEYACLDV

>E4YK60\_OIKDI

MPELTKESSNGRTHVDILERRLLQNLHTITIQENYTDLIEDLDELQLRNLEVATDYLCGSEELLDER  
 ERLHEALEIRSDLRMEKNLVKLEKKKKNELKAALADSEEKRRKLIKKKGKRKKLIADFWRLSGSFEMTF  
 LTLF

>E4YK86\_OIKDI

MWTTWFVVMNKGLLIAFFALGAMRGQKVGSVYARNGLIPLTSIINLITQVLVLYVYAYIYYKYDYDY  
 DDYFFHCTSTCYSIRKASFLAIVSLILSVVVIIDLIVASCKEPKPIPPPQNAVVPIMMSIPQYAQT  
 QVQYADPPQYGTMTNKNPPTYRQDLLVYNPQPAQPVMTMQYAVQVPVQKNPNEFRNLFNAGHIALMTLN  
 AIFCSLIIVFMSDCLSY

>E4YK87\_OIKDI

METCLQYDYDGGQVEYGVVVPYDEFDQSVKMSPPNEEEEDAPAFANKTLNGDNFKKYAPFIILTIIVFVVF  
LKCWCRRNTKIVEKMKKEGGAKSGGATSGGAKLGSVKKPPKEISVTIDPDSNDNGVPPAPSAARTLRFK  
EQAEKIGETFMKVKAPFQKPMKGYQELGSESDSVAERSEANFDVDKYGAISDRFF

>E4YK88\_OIKDI

MGKFIVNTTFTAICTAMCFVAGTSFTRAFFTIERYFGVSSTKISIIYASFNQMAAIIIVTPTAVHLTRN  
MHIPRILYFSFLAKAVGFIILVLPYFLGPTYHPDGLVNAERNDSLNEENIFCRNEAQQDTTRNSMGLWEY  
CIPISKVIIIGLGGCLIWPHSISFIDNNSKQGGQSLVFLGLNFVGLFGPMLAYGFASYVLSLWVNFTYECA  
PEWVDPNGSDWIGAWWVGVI AAAALLVFSTPLAFFPRNLKDENKLEETDDKDENLVLKDHFEDDKNT  
IKKTSSSMISETKALFKNPLFVMQVLAGIVNSWAMATKATFGQKYMEIQFGLSPADASQLKVVYIIGSLCL  
GFLVGLLIVKLLKLPFNVAIFLLVVQTFYSVTFLLWSLEGCSPTDMLFGANEEQNLADCDKRTDKF  
VPVCGKNVTMDGYLFEELTILSPCKAGCSDVDVYSTEELKELFGCPVISEGVHSRKYINCAVPVETGICG  
AIECKSKVWIYGLVCLGTFSSGINGSPTVFLRSVGSERKPYAMSLGTCMKLFGWLPAPIIYARLFD  
SLCAVKGSLDNCVFDNTAVRHFYFGINAVIAVLYTLINCGFLTIVFWKRYKSDKPMWGDMDMDKPF

>E4YK96\_OIKDI

MKAYHEHLRAQDFDCLFFNAWRDDASDKVFFDTILTDALDEKPAGSLENAVERLVAHYSSDDAFHLVIFL  
NNIESNCIARSLDLLVELVTCKISLVATIDKIYGAFAFDQCQRSQLNFISIETATFMPYVHETKSGHSI  
WAKSAGKIGVASLQHVYDSL TANGQVLKII IKDQIAKIKEKKDGPSPFKELYKLCRKSFLVNSEAALKAQ  
LVELKDHQLIGESTQEIRIQLQTSQLEEFRLRTNNK

>E4YK99\_OIKDI

MRVDIDEAFAFARKLALENGEIVKNAFHKPKNVDTKSNPSDLVTETDRLVEKNILEAIRAKYPHKLIGE  
ESFVGPMSITLTDEPTWVIDPIDGTSNFVTGFPYVAVVIGLVLKQEPVFGVVFNPILGEMFTACKDKGSF  
LNDEKIAVKSTKDINNSVILSGFSSGRNYEHLAKVRNLESVLMNPAIGIRMLGSTACAMTMAAGRADA  
YFGARFHIWDIAAPSIIVTEAGGVVSNLAGNELNLMNRQIISACTNELINDIARKITPIEIPDPDGKLE

>E4YKB2\_OIKDI

MIRRGVQRLGIGLALGVGYDRLVADRLWGMRRFSYFDRAWSTGVAAIGKLTFFDDGLGTPDQIRI IDKYR  
FEILEKRAEEMIDSFMKSIIVKSKKIDGDYLLVEGELDSNLDLDELWPKECRKGFFQLVLPVDGVI EGI  
AIQTAGTGDHGFKRRREIIAKPLIQEHNIASCIMENPYARRKPKQYQYSGLSFVLDLITLSMGVIECN  
ALAKWLKEELGVERICVTGLSLGGHTAALAASISPVPIAAAPGFAWSTSTGVWTTGALSNRVDWANLESD  
INAHPGYEPLFESLGTGLDRWLERDQEI AQQIDSLPELQETQEVTKNLA SKL KLLANHF SHLGNYPVPK  
DASLIHYVLGEYDYFYSRDQMTGMDRVWPGTTFEVHPTGHVDGFLLYGRAYRNSINTVMNRLPEARSKSV  
NLYALENVPYEEIVDGQGTDFVQKAFQYCTVQTVNFLQRS

>E4YKB4\_OIKDI

MSEDQSKPVKQSKVP SHDQILEYLTMENTRNRKRLALVDEFIKAQARVPYNYETLEAAVQRIYAECVRK  
PQYASTYTFCLKVYHKLGDIGFCLDETGYVSTSYEDAAAANMKWRGFREILVELLRTNFYSENKEQGL  
IRMIGELYNCSMRRLQRIYFDLMHRQTAQDLIALTLTYAVNDRLINGPAKQFVKEEMHPSQKEAER  
RFGHMIFEGLKIFIPKVLQEQLHDNVAMELQNL YNTVVVFSLTKIK

>E4YKB9\_OIKDI

MACQFFRQKYLADRMLNLIKQEVFKRQVRPKLLAILVGEDPASQVYVRHKNACNHVGIASEIIRVPETH  
STAMVSEILVDAGEREDVDGILLQLPVPDHLDERFLCNLIPPTKDVAHNAASIGNLVYGRGIFVPPPTAS  
AVAHCIQENGIDTFGKRVLVVGRSRHCGLPITLIMQGFRTHELPDADLYNIAASSDIIISAAGVPLI  
RPQMIKEGAILIDIGFSRKISGSSVGKVRMLMGDIHPDCRARASFITPVPGGIGPLTVAHLVRNTLNAHLH  
ANGLPRVSLASLCRPEFEDEFEYAS

>E4YKC3\_OIKDI

MRKHTLKALLRRKKSHTLGNKWSILFLVAVSLARVAMGIFNSITGPTLPVLAQHVCKSPPTVSWIFSGRSV  
GFLIGSALSSVDFRFGISQMLMLSLSVLLCAVGLALMPILTDLWLLIIIVTITGIIAGYIDAAIQCIMLK  
VWGSKKSASILQLHHTFSTIGAFILVSPFYSGDDDICSDSVDDNNEPVCLGIGDNNSILTPFLISSA  
FIAAVFFLMIWLYFVDITEKIKEDNQESADEREEDSIRDWQYFIPVILFYFCIVGENVYQSNIFSYAA  
CKVWGESGKASILNSIFWAGFGIGRSGIFFSRFLRPSTYIIIDLVFCAATATFLSIFPTNEIMLWIGSF  
TYGLGIATLYSCGSVTVTS

>E4YKC4\_OIKDI

MIIEFLTIVLLGLADAKSVKLNVDVLTLYAGRMTTGRRSAPVPLQCIIGGSAGCSAFVPTVVQCYNRG  
TDGQDIQWECKADMEMKYKFGQVQVTCEGFNYPDDPYVLGSCGLETYIDRVGSSSSYSSTGGTSFWSS  
SNTDSSEEGSWALFIIIGFVIYLLVTNLNSSDDRPYPYNDPFIIPAGSNPSSNTGWFGSGGRNRASSNS  
NDGPGFGTGFAAGAATGFAAGNAHGRSNRRRGWFGGNSWFGGNSWTNTNNSYSQGFSDGRRSSPSRRSP  
SPAATKTASGFGGTRR

>A8PAZ4\_BRUMA

MAEFRILAGSSMLKLATKPRYAKFVTADDLVMSALGYDEEFEMRHRFFGKLNKHLMALQLHVEYLGFLA  
LVSLYDDVDFQNKMRVLVDANITKRKYMERSKMKNFAPYYQPEYCLAYAIYILAKLPSFESIKCEPELR  
RLTESIWFLLGIF SARKEPGSLEFIYNIQTVKNSTDSKLESCSREELQKNEKIWALCDIGMLMSYRV  
KILMKDIQFKPLLSKRFFLNMGKANTKVYLPASFVKEMKTYKANTKHQKTDTTKAATKSFVRHSLTNNK  
HSTRVSSVLKVGSKRAVSKRSNRNRKAKVNDPFIISNETDEIVIKHPKLVSEEGKPKQQRKMNEKKSULEK  
IFQTSSGSSWDLGMEVLIFSSYFHDV

>E4YKC6\_OIKDI

MAKGSRKRFNKSGRDQTVATVVTANNTLIDGENNESNDCNALILDKKTVSIKRAPILQPKLSKKKRKHLE  
KLVEQKEKKAKRGELLEKLNDLRVPSELARYHSIAHIGNKKQKEKSVWLAKRPDSEILKEEKINSIKGA  
KQAKLEIDEKGEKEAESDVSSTDEESDSENGEKEWCKKKEETFETESIPKLIKDEQESEESKSKLLDP  
KLDYVLINRPSEIQEARQELPILSDEGTVLEAVAENDFVVLGCGETGSGKTTQVPQFLYEAGFCVRGMIGM  
TEPRRIAATSAAERIRYEMCKTEAEVAHHIRYENKTTKETQICVMTDGVLLSQMSSDFLLSKFGAIIIDE  
AHERSIHTDVLIGMLTRVVMRLRRRNIPLKLIIMSATLRIDDFIANKKLPNLAPPVLKIESRQYPVTTTS  
FAKQTELRYIAAAYRKICKIHREEPAGSILVFTVQDEVKLDLDENLSSFDLSSSTALDATLPMRALPLY  
SVLPPSEQKNIFAEEFPIRKYVVSTNVAETSLTIPGIKYVVDTRGHKAKKFSPIITGVSKFEIEWISQAA  
ADQRAGRAGRTGPGRCFRLYSSAVFQDFAKFPPEITMKPLDDLVLGMKAFGIEEIKNPFVTLDPDEEAL  
TNAEKLKCVKLGALKRPHKRVFGSITALGKTMNAFPVSPRFRILSLSSQKNLLKFAIAIIVA ACTVRELV  
DANNEKIKALKEIWADASKSQLGDLILLSSVVGATESSKEPETFISAIGVRSQGLKEVRKLRRLITHVVR  
SMIVNEEEKELAERKLPQGAKECTLLCELFLAGFGDQIAFHSEKGEFKLPTGEKGIYPSSVLAKKRP  
NIICYQEKMENHKGNTYLKCCHEVTAEQIVRIVEPVVTFNRNKNSTPKYDANSGEIEALYTCYYTSTNTP

LGEHWKTLTGEDETLRRCFAHCLLIGEVFPFAFKKLTFWLSPPAVLLRTWANLHERTTNLIRCFSVHGLT  
SRAAFLKKLQNEESRSEIAESLKEWLVP SHFVHIESIIESISE

>E4YKC7\_OIKDI

MSNNSDTVSNISRDDLNESGYQEVNRNKRVRVWVAGSVTFVVLCTIMAVTLPPALKVEKTTSTAFSSTTT  
STDATGTFSTLSTTATISIFSSAEWPENITTTSKNNDKATFASTVLSSTFPPTPETDTTQALLPVTA  
ERTLVQSTAITTEIPDTSSTLKPFFMYTTSYETTTVSIVETEAECEFINELLELDICLLDQRYPLKHCNKN  
NLGS

>E4YKC8\_OIKDI

MASPQNDSLVLVSGGVGKSALTVQFHQQVVFVQYDPTLEDNYVVRHEVDGKTYKLSILDTAGQDEFSL  
FRENYKSGEGFIIVCSFDNRNSLDEIKKFFGDIERITEKRHGPIIIAANKADKENRKFDEEAVRNLCNQ  
LNLRYIVTSAKTNLNVENLFTEVSLK

>E4YKC9\_OIKDI

SNVTVALRDVESDVVIDASFTGQLLNDERTLNFNETFIFKSRSIETTVDIKSAFLQENLSLELTHQGLDS  
DSEMHAGLLVSFGDYKIGATIHFLKPNVMQILVSFAQKKSWLYEGLFKAYLPSFQQLEFGDALNVTV  
AYDEHDESTWADNSFFIECSTRLNLEEDEDSKYYALSNHLTKNIIAKNQEVILDVEMWIVQADMLRF  
VVESENDRYMLSYLLLSNDNDRFSTKLTNNLYIPYLVKLEDGYMLINTYKLLSSEHEINVDANIASVIL  
SSDPAEYSQLPRSEYGFNMQENYQKLSSEFFKDKKEYKIGYEFYALDESQTFSNFTGNGQINFGNLYS  
EGITLDINNKNDAAGLYGAYTSQNTIGFESEFDKKGIASTGVLKVKDLYNTSSIPKIRKIGGWQWFKF  
PESNIGSFQLFHPHIELQTSLSKIAAFAHRMIVNFRKYRRFGKVQITGKSKFPKYNEADFGNLDQAR  
SMNFTLETDEEVQTKIDFAVNDAIELHLVDNVFLPKYLRIDLFFISKILEKKRWSLRGRIGHDLAPVLDC  
TSTGDVDTTTVFHCKGTEFDVAVGFDLQTTNNIQLAGIFGFDKELKLDVNLLDDIKKMTLYREN  
DNELIKWKTEGALDLKNQPKAVISTSLINDKLEIPKTI EFESGFRVNELQSSINRIDVASILASLRNFD  
VEHWTNVAWNSEKVNFRPKIAFNLDLDDAVSVRALLFLENTLKNLQENGEFAASRGGDSGEIFLQKLS  
ILNLKNSTNPRRSLVLGETDGLVKNLVKAVGDHDFIEISGNRILRSGQVDMTSLFSTSMEFLEKFFG  
PYLKNLVKGLASKIIQIALDNVRKQELELALETSSRVSENEQKIRLRNVKLAQSDFLEKWPREISIR  
GICQSTAKNIEADLVEVLLDDFVRCRDLVVKIRKYKRDVEALEIKTKEFDVAVPKRMKVLITGTDISND  
GYSADDSYQQLDFSNTTEISSEENQLSPEINLHLKEKIMCFFVAKLNLQFFKSANDFGDFESLGSSES  
VISIANPSSGKTLFEASFHPDVGTSEILTFEKSFGHFLIGRDYEFVSRVYQTRNFTEAIAYSFRHDFFP  
RLENI GENYKYRTILIRKVDYNRKYTPSYFDTYTELFAISTAQTKNDELAHLRLRPSLQGSKDGYFIT  
QYDNSNKIQFFVGLDKSRGLISFTKDLKINLIDSIIYAPLKTFLFNYEKYDDMMFGLPFKCHLGLFIDS  
ETIFKFDLINDLGISAIEFQGEERFSIKVSEESDYSSSSQYFFTCALSSWISQYYGGAISAMVELNDR  
EFKAMEFRIGDKAGFRKLLKASVIYDNQEEMKNVSTINIYELSDEPMTFQFNILNLDLDFETERFEF  
ITNIKAVPNLEVSDHLELELKGGLGVSKVTTECGLKNNSVIVSSLRVRCPRFFSRIGKIQFETENGPFI  
NWNVDHKTGKMVVPEANGQKIYDFDFEKKTVLQNGNKSANWGDDEIFISNTFENSFLPFDEMKSST  
EKGLLIELDSEETEIEAVIGDTEFNSITIDNDGQISKIENSPENAFKIHFGDNFDIGVSDASGSEFSWG  
SETTEGSLYLGLGGVELNSRNKRTDEQFSTGMRCEITPLNPCKAWLNKKFVEISSKINYQIDLNRRIKI  
AAEILFEQNISDEISDFMRINTNAMVGIGKQYFSTGFGFSEEREPPTLSQIWSVTAKEELESVVSLLT  
ANLTD SQNGFFHLLFGEDFEIMYQPKYSKAVGIVGHDFKIGGIFNDEEQNHFYKPSKYLSPWHVAANF  
TKFISRDDYSAKLEVERKSQNFVFPFGGILEFEVEDSLSVGNLKIIRAANKNELETYFELANLDLFFLSK  
SLASTNFGDLLWKNLNPQMNLSLLRLKLDLPCMEFILDSPIDDNYMFAREL VNTVNCFGEPGIFHGLGD  
LAMIDDRVCYGNAEICRITFISDKLLEDFVASGFNENLVAENFQDLEHVLQNSIDFTIAHGGIKDFSR

EISTSLNVDSFFVKALILHINKILLDVEKAIDFIEENSSLSISPDSIKLTLPHPLFLLQVPYSSSLLSSL  
TFLNDPAMHYFNQIASDFL

>E4YKD4\_OIKDI

MKVLASIVASVMAKWSNFDKLDNETQFSQFESCKEEVHAVIFSNEIENGGFNCEHLNDPVPYHTIICSA  
SCDGDNYEHEWRTSRFSVQCKETPVKTKFKGDQSCSLKPVDLCEEFYIEDLFPMGDFVLQRISKRGAAHK  
LARLSLQCHDSKSAKATCMSNKGELKSKENLDFCVPEPEYCEPLVIEGSWEFIKTRKNGDKVFELNC  
PNTDFDMRGKVICEKATGAFRNRHHTEDFLNFCAPDPSPGDGGDSSGEGSGEGSGNL

>E4YKD6\_OIKDI

MINFFKLKLFIKAVSILISLALISKMTKTEDFDNKDTPTEENKEKCATNISRMIEENQMNPDLMVIKT  
TKINNSPHINDLVYVVSLLQIGLTKGTCSGVSVNENWIISSAHCYSSRVNIYFGQMNGTYSQIISSSRVIR  
HPHYNSSLENDIMLIKLSIRVSNKYILQN

>E4YKD8\_OIKDI

MALWDEPAAGNAEYLRLPRLKMDIQNAPFEGKTAVVWPYSETGYCKGYKMGEKDGKIEVKRLADDKVK  
LFPEDVPEQNPVKYELLEDMANMNTYLSEAAVVHNLNSRYELFLIYTYSGLFCVTVNPYKWLVPYDNHVV  
LCYYNKRRTMPPHVYSISDNAYQDMLRACENQSMITGESGAGKTVNTRVVIQYFAVVCALGSEKDKKA  
LKGGGTLEDQIVAANPAMEAFGNAKTIRNDNSSRFGKFIIRHFQVTGKLASGDIDTYLLEKSRVTFQLKA  
ERCFHIFYQMLTGHKPHVNEMCMISTDPYDYKWCSLGEIKVKSIDDREEFDATDESFDILGFSDEKAGV  
YKITASLMHAGNAVFKPREEQAEPDGTDAAEKIAYLLGVNPQEWLKAECTPKVKVGEYVVKGGQTVQQ  
VYYSIGAVVKASFNRLFVWLVVNRALSTDLPRNNFIGILDIAGFIEFNTFEQLCINVTNERLQQFF  
NHHMFILEEYKREGIEWEFIDFGMDLQNTIELIEKPLGIMSLEEECIVPKATDMTYRDKLFFQHLGK  
TKSIGKVKKQKGFEAHFEIYHYAGTVAYNVTDWLLKNKDPLNLSLTLFKNSTLSACKKIWESYVSADDA  
PKGGGKGGKGRQESLLRLMTNLHATQPHFVRCIIPNEQKRPFGMDNNLVHLQLRCNGVLEGIRICRKGFP  
SRVEYSDWKQRYCILNPNAVPKAGFIDPKKACEKILTGITADPAVYRFGHTKLFKAGIIGALEDLRDD  
KISEILTKLQTRMRFNLQREAFKTIKERDGAUVIQSNWRAYTTLKDWEWQKLLFKIRPLLNTAEKKAEF  
DELLKEYEEMKKELEVESKRRTLAKVEKKEKKALQEAHQALDDLQAEEDKVNSLSKAKNKLEQQVDDLE  
QSVETEKRSLDLERLKRKLEGDLRLAQETIMDLENDKQPAKAKSEKSRSDLSRELEELSERLEEANAQT  
QGGIEVNRREAELAKLQRDLEEHNIAHESTLSGMRKKHADTSELTEIDNLQRVSKLEKEKSELKME  
ADDLISNVESLTKSKIYGEKSCRQLEDQFAELKMKHEEQEKAISDSAATKARLNTYENLRRTFEEKEQI  
NSQLMRQKNSVSQANDEIRRSLEDEIKAKNELQRQLSKSNSESAQWRKYETDAVQRTEELEDAKKLSG  
RLSEAEESVEAALAKCSSLEKSKGRLQSEIEDLTVELERANAAAGALEKKQRSFDKILEENKVKQDEINA  
ELEKAQKDSREASNEVFKMRNAYEEAVDCLLESSKRENKQVQEEIADLTDQVAEGAKSISELEKAKRNIEV  
ERNELAASLEETEAAVESEEAKTLRITVELQQIKNESDRRLQEKDEEMDNNRRNASRTVETIQGDISDIE  
IQLAHANRQLNDAQRQNKDIMGQIKDAQMALDESERYDEVKEQTAVTDRRVNLLQAEIDELRSAVEQAE  
KGRKAAEQELMEANERANLLHTQNTALANQKRKLEQELLAVANEVEEAIQEAKNAEDKAKKSILDASIMA  
EDLKEQDASAHLERMKNQEGQLKELQARLDDAEQVALKGGKHKVQKLEGRLESELDNERRRGVDS  
QKAVRKMERKVKETVYAGEEDKKNLSRLQDQADKLQLKVKQFKRMAEEQEEASTQNMSRYRKLQHELDEA  
EERADMAESTLSKMRKTSAF

>E4YKE0\_OIKDI

MAANDRSPQWLEVTFDSDTVVSGIMIQQVSEVNKWLHVNGKRDFPEENNLTNFFISYSQKKKPLLGAGKW  
IRGESFETNYKWAQKGISYHAFKTPVTCRRIRLNCTKTLGGWCPAVKIEWIG

>E4YKE8\_OIKDI

MKVFIISAASAFSTAQMPCDIAIQECSLNADCVDWPYCTEDGLYFTGPVCSITGSCSCIDRLNGAVSVS  
SEGVELTTQVFLPADFFGSWMSDNNFSCDMFSSDASASASLAETVPEYVLSQIDL

>E4YGL4\_OIKDI

MAETAGFFGFDALPGDSSAWDEDEASRSSNAKNDETFGSSETGATAWPKLGDPRNLVSKLDRMSVNNSG  
GFPDDPAIMSLQEKPI SMPDRSAQLQNMKEIWARPQQQQQLAQSNLQNMKEIWNQAPPPSSVAPSVSST  
IAPPPGFGPPGFAPRPDAVAQQVNNVANSIVGPNLTGPAPQTAGVGNIGSGAVQQMQRGLNVEELERQH  
FAEGLDALSRRTLVKDAQSLEAVQVVAQQIRQPPQGTIGQLHPEHRRALERKNRNDNRNRNRNQRR  
RDPYANLMSRREREWITSMQLRALEIKNPETEDYVVNYMKRLMQGNAKNQRELILPAPKENNRNRKRN  
DSEKESKKEGDEDKEKEKKERKPWSEGLGKPVSSSGKSIYEYLI IKLNC

>E4YGL7\_OIKDI

MPPQRFVFLERDQIQDRDRDEENRLTEAQRNKEHLSQLEGGGTHYVTAHHLHGSGGSGTGSVQTTGSESG  
HSAHAHFLPREQNIQILYESQMEVDVEDVRDLPSYSFQFGLHEPSRRPFPLIYPAPSTAPTSSQSTMDRS  
QWTDATGSLFPNSARRGSFDSSISPATPNTQTKYQRHYKSINVRPDKRNLTYHQRRRAELSNPYHSSSTL  
SSRPNIQHYLSASDLTGPTAPITDLKKRRLMLHELKNQLGDLKDTNATTVMQIHAENVKQGRDKYKTL  
KQIRRGNTKSRVDQFEAL

>E4YKF2\_OIKDI

MSQSKGTISGGTVSKI IKDPTLGNIQTKALGQSGFQQNIPTKASGFAQSYDIDVEVETTQTIHITNVQII  
QSEVSIVES

>E4YKF3\_OIKDI

MADRTYGI VGMNNSSSKGMTRDRKDQLDKNTLATGRYTVKSKTKLPFL

>E4YKF5\_OIKDI

MKNKLFQTTITGRLELESNFDDGKEENEEQVHPAFENILLREKILLCKAKILELKDYMSAIFFALCGAY  
VVLASWIDFTRAFPLFMVFLVYLAVKFYELSKEKIKERLAGIDRTKIRKISAFGGIFLMLGIYAETLYTT  
EYRSNVITASFGILVFMFISMMMCVSI IKIVWRPILVGLMLQFFIAAFVIKTEIGFAFVEICRSKRFLRF  
ADAGGIFLFSGYKGDLTNFVYVCPVIFPSSLSMLYSIGVMDFVINFLSFALTATCNCTQSEAVACVG  
NIFVGAIESPLLIRPYIDHMTYSEIFCVMTSGFSSIAGSVLGAYLKLGDARALITSSFMSAPGSLMVAK  
LMFPEVTPSKLTTKKTEQDKSRKSRNLLEAAVQGAMDAFPVCFNITAMLIVFVAAIECLNDIVVMCGLF  
DIHDIRLETIFGVVFRPLVLLMGVPYFEADFCARLLGEKIFFTEFMAFQSLATSKGYRDMGREKCDGDN  
QKWSELSETIMTYALCGFANIPTMGIMLGTMAGLAPKRKKVFSKILAKTCVAGTICCLIRGCIACIFVR  
ISFLPDLQLSFSSSLPVILNSARSTFTSSILNLSQVSSFFRKKNLQNFQSVQHFLPRRKSVEHF

>E4YKG1\_OIKDI

MFSEELLGRIEELTIDEIRDEHEIQLEKITKKLKDEEQTRLRKYELIEKKIHRVAMICEKNRKYCQ  
ARENYTHERDRAAKLGT

>E4YKG3\_OIKDI

MMEVVSPIEATNLSKNFLSSEWMGAKTKSEVNPNECENNREEDRKL FVGMLSKTQTEEDVRRFLFGKYGA



IEECTILRTPGSSKGCFAIKLANVQHAQNAIAQMHGSTTMPGASSSIVVKLADNEKERALRKMQQMAAN  
 GMVSPIMNYAYPQYDIQSIGGFANMWAGGIVAPMGQMVNQMVHGVVPSAMMPQMPSPAPQSPIAISTTG  
 STSADSAQAHAQVQVQAAAIAQPATAYSLQTAYDSTLAQYQAQTADLSTLAATAAYGGYQFVMVPNPA  
 GGYTQVPLSCGGPSMAALNQNPCAPQREGNFHSLVLHNFNKLPGPDGCNLFYHLPQEFTDADLANIFA  
 PFGAVISAKVFIDRATNQSKCFGVSYDNAPSAANAITSMNGFQIGMKRLKVQLKRPKAGDKNF

>E4YKG7\_OIKDI

METRSRPIALNIKTDFADDMERHDFVELDLGIEGSYGSEGGSTLVDDFTGETKFHYKDFGSDWYREL  
 AIDQRKRAREKEKAENSPNIVNYVRSADAASGWIIVTVIGLLAGFAAGVIDIATKWLSDLKSGYCRGHL  
 YLNQECCWSDNLHGIDEDNCTAWRDYGNPNSYGGHVLLFIMYCLMGTLFATIAVILVKMIAPYACSGGI  
 PEVKTILSGFIMKGYLCFGTLLVKTLTmplAVSAGLMLGKEGPLVHVACCCGHAVSQFFPKYRNNQAKLR  
 EMLSASAAAAGVSVAFGAPIGGVLFSLLEEVSYFFPLKTLWRSFFCALIAAFSLRAMNPFQNLVLFYVEY  
 DKPYHLFELFPFIILGILGGLYGILFIHMNLSWCRFRKRSLGSSVILALGTSILAYPNPYTRIQSGHLI  
 RLLFKECKRYDDNPLCDYDYSKNATTVFSDGITQASWQLILALIVKSALTVITFGIKVPAGLFIPSMVTG  
 AITGRLIGILTQKIEAFYPSPIEWGVCADPTSCIEPGLYSMVGAAAALGGVTRMTVSLVIMFEVTGGL  
 QYIVPFMVATMASKWIGDAFGKDGIDYDGHITLNEYPYLDVKIDMQQKVRSIANNWTLTSIPFQGSSTEK  
 LCTMLADHPYSGFPVITVTQGRVAFITREDLHEGIAAGRMLISDDPNDEFIDQTVLFTMSTPLVSAGRVP  
 IRLNVIDYSPVTISEQTPIALVLEMFRLGCRQVFVIRQGELVGLITKKDLLQFIYETRNDQTSYSQF  
 K

>E4YKH5\_OIKDI

MNRISLVNRKIVRWSSMSTLNDFIRARTSRVASVEALTYQNMTPKVSSEQIQLEYKLNTELDLNPMMGM  
 HGGRMAYILDSVMSALASDFDKTDVNSLNFVSYLNGISKDLSFLVTAKIVKGGRAMAFLTAELSSKAG  
 EIYTLSEGSFAKCA

>E4YKH8\_OIKDI

MDQPGWTLTAPGSPAPGSIARQESVIEEMVMSMAEAYKSAQQGKVPSSPATSTPPAPSPENQQYHPLAA  
 ANLHQQAAPGYLPTYPQPPQMTPTTYPPQHYATSPPTQYPYQYGAPQYGDPPYGVHPQIPPQQPYP  
 TPALPQNPLQPYPPQPSYQAAPQHPQSQYQQYPPRGYAPAPAYPQAPPAGYYSQPAAPYGYPIQQQR

>E4YKI0\_OIKDI

MYKFIPPAIIAFISYFQSWIGSFLVVVFLIGIERKKNV IAGIEEKWNPTNELTKCIKGGAPWMMFKVNA  
 SCFGLLTSYHESINWKSIIIRCSIEYRETKIFDYLINSSQSNKLLYNCFVENLATWFKLTVHSGDPTLAKL  
 FFDVFGSFPEIRTLPPDFAVRPRQSLADNGTLIILKKQAIRAININFRVKNYSSAIRSCPLGDANGSTLA  
 LSFEDVELMLKEAAYFESRHRFKIDKMEIYFKTSGKTAVTALFSIINYLLQKDETFQNLAKKYLQILEL  
 FLKLPLEIPEDIKCSVDLDFLRYSENTKIWKTDVGLSVFQLTQLWFGNRGNLQFRCKQVLLKSKKIENLE  
 KNTDIPEIIREYVTLNTSTENLVL

>E4YKI2\_OIKDI

MSDWGGFSDAELRHLRSGGDANPTSAPKPKSTASKSSKALAAKKTSPKPAKKLPEEALFPTSTSSNAAK  
 KETKEEQVHKIDTSSKEDEMPDFIEEEVVEQKKKMDIMEVEKAQREMEKNRRRAALSQEILSRQKKA  
 ALESKMLATIQEELVKLDNLLNADVAVLRDQIDTACFEFSEANRRFQTAEKEYVDSKFDLQKKTETKDSL  
 TEHLMNLIQANEERKQKLEELTFKLSMDPEIVAKREAAAEKLEKLEEEAKQKATAEARKKAAEEAENAK  
 EADATAEIKEETTSTSSPAPQEIISREQTPEQDLSEPVADTQSS

>E4YKJ9\_OIKDI

MNRVAKEGFLKCTWGNVAYKIWNKGAPKRAVFLHGWDHLSVFEPLISNLSNSEIEILAVDLPGHGSDH  
VSWPWNYSHSDLPKYMIEILDRMEYRKYHFVGHSGNSLTPSLAVSSDEVQSFTILDAHGVITMVDDMY  
LFTQRKALEGTYSKRVENPKQISREELKKRLLKSTIPLEFQDLWLERGVKWNVERTHGHFARDIRLNE  
SNLLDHLKMPILRINGKESDPFGGVDPNPAMALFDIKSVQRFSEEISKKENVTEFHLPGNHHFFLPQAR  
ETAKILEEFWSSVE

>E4YKK1\_OIKDI

MEGLVKWAQALSDKEVSYLGIMIVNGLFVAPILTYIMPAYYGRYSKSWFSISAKLSWLVECPAFFV  
PLYLLTTPALELPSQMLLGMILHYFQRSFIYALMQRSKNNVAISITFFAFIFCLYNGVMQGLALSSVY  
QYPASWLSSPQFILGSFLFSLGFLGNIHSDSILRNLKPGESGYKIPRGGVFEHVSAANYFCEALEWTGF  
AIASWNFPAAAFATYTVANLLPRGLSHHQWYKKNKFDYDYPKNRKAIFPFL

>E4YKK7\_OIKDI

MKARKISNFFFKSDLFRENSESTGSLARVPSHRNKKSKHHKKKKSKKESKFERLEDAVERHQELRLEGE  
EPIYTDDDIADGRVLDNPMNKFPQPMVGGELDPEIKKRIEAAQAELSMEAPEEIIKSSRDEMVDGIEEDE  
TTTTSTTTTTTSQTTKKEDTTAENEDTTTEKDETTTMENEENEKELENVEYENEKVDEKTTSTTTEE  
PTTTTESTDSESEPEKVSDESRNEDSEERIEETEETTSSTTTTTTNANAENEDIARETTTSTTSTSTS  
KTAISPDNNQSKSEEKEELIDINDVEVEKTEESEPDTKTDQDNPGQSIEAIKNPGELTLGNNVKVISP  
KKEEESIAAKQKAANDLAELMKRKAMAGHAQFGSHDVNNFEAIMPELRTINPVNRYEPYDFKKGTPGEAD  
IFEKREKVKEMTLHAWNGYKLSNFGSEVNPLTGQPVNSELFGKAHTGLTIIDALGTLYLMGLEEQFLEA  
REWIENDFKFDAEAIPAIVSFFESNIRHLGGLLSIYQLTGDQLFLEKAEMVGVLEKAFKGEKMPYGR  
DLPNGSGMSQGWVPGGCFVLAIEGTISMEWVTLGNETGDLHYKELAEVQNFTRHVGESGIYSNFRPT  
EEGLEGCSSAISFAGCADSYEYILKFYLLGGRKDDLQLSWLEKTVKGVVEHLVLEQKDKKEYQIMMVEG  
QQRNPKTGSFDFSKGNRMHGLACFAGGFWMGTSQVLTDKSERFMELAKGVTQSCRDSYVDSPTNLGPET  
FSNTGASNPGNDYYILRPETVESYFYLRWLTCKDEKYREAWDVVQALEKHCRTEFGFAGLKS VKTGQKNE  
IQESFLLAETLKYLFIFSDDELISLDEFVFNTEAHLRINPSIHQ

>E4YKLO\_OIKDI

MSDREPLIREDDQEIISEIPEIENETESQTRTFTDTGVETETRLERNLGLYDAVGIGVIMLGSGIFVS  
PGGVMANAGSFGSSIIIWVLCGVFSLGGLCYAELGTLIPESGGDYTYCNRIFPDIIIGFLRLWVEVIR  
PGCHAAVAVTFALHVLQPPFPQSVPSIPKKLIAAACITLFSWLNMYSIKGMTMVNSYTAFAKTISLILI  
IGVGIWKAGQGEIQNFMPDEFWKGSTTDFPKLCLACYSGLWSFAGWTDIVLVTEEIQNPAKNVPLAIIIS  
CTLIIGLYCLVNLAYFTVLTVKASAIATAQVIEKALPNLPGHQYIIPILVSLACFGGVNGSLFASGRYY  
FVAGRNNHMPPILSMVQIHRNTPSVACFVNGLLSTAMLVNDDIYSLINYTNFIYFVCIILAIGGLAYLKI  
TGQADGSTVKVPLPILILTLMFSGVVLGAMVLTPEYELGGIILTGLPIYFIFVQPRGKLEWKQNMQ  
PRYENFSRFIQKLMVVVPETKEE

>E4YKL4\_OIKDI

MEILYFLSSIIIGYYLGGCIQDVRVEKCNVQSLQETRIVQEPKESKKKIFIAIHSTPKYLETRGDAIR  
STWLNVEDPNIATVKFISGPVAGFPTLTLPGVNDYDPPQKKTFLKLLAYFYSAHEYDWFYRVDDDI TLQ  
FDNLIQLVSKLNANNEHYIGGTGFRNAEDFIPSGNAFCMGGSGVLVSHALVRKIRPHLSTCVKNLMTEH  
EDVEVGRCIWLHNLKNCTTSYETGQIFFQNWRRDALPGEVGYKNNIDAEDLKIKTLDNAISLHAIKQPE

SQKAVRIRILKRRMQKLISETGVMRSIVSKNLKNRRLNECLWDEIRNVNNEHTPALYQNNVIPGMKLRHP  
 WPETLRKTDSPVPGTSLHSSLYRCLNTDGFISIIRPGMDNFGWKLILIAARFSEEIVVKESTNLLVDTQQR  
 PLTLIVPLYKREDAFMRFIKLYSRLKTHQNLNFIVAIAGDDIDRQNIIVEIIEDKIPQTLFNTHVRVKTC  
 KLPFDKAHCLQDAIDLKKEEDLFFVYDVIDIVTEQFIQRIYFLGHDNVYFPTLFSQYELTDHNSQNISEV  
 NGFWRSHGVPVAMTKQTYLKSSGYNQNIHGWNEDTELYDDFIKNGIQFVRSHEGIFHPWHSKNCISGL  
 QSETGQYAAACVKINKEHTMSQTRLATKVLDIPTFNKIK

>E4YKL5\_OIKDI

MGGKLSNLHGSASSEPKDVYLDITIDEIPAGIIEIKLRDDIVPKTCRSFRALCIGERGLTLKGSKFHRII  
 PGFMAQGGDITKGDGTGGKCIYGSRFKDENFNKLVHVGPGVLSMANSRGPDTNSSQFFISLDKLDWLDNHNH  
 VFGVKSMDVVRLEKMGSGGCSRLVEIIDCGVL

>E4YKM7\_OIKDI

MRLGLVLSLSNSVLNARELLVITVATEKTDGYLRWEESVRYSGLSRFTGTGEDWLGGDITNGPGGGHK  
 VNLLKKELAGYKGNSELYFLFTDAYDVIINGKEEIFSFRFDDIVSKVEYKTNVLI SAEDLIWPDASLEPK  
 YPLVLGKRFCSGAILARADVFLDLLEYRAIGDRDDQLFYTEAYLNKELKEKFGIALDHKAELFFNLNG  
 ALEEVDGFARSATGDNVENTKYRTKPLVIHGNGPSKNELNRI SNYVPPQWRPDYGPACSKVLNNEIK  
 EDIDTSKEIVIAFIIDGITPFVHNSLKRIASLDYPAEKTHLLIYSNTVWADERVDTFLEVFGSSYKSTKF  
 ISSKEKMSVTMARKFALQKTYEKFVVEFFVDGYVQLTNPVIGELIKTNVELVAPGMSRYGKLWSNYW  
 GAVASDGFYSRSDDYLDIVQGTRVGIWNMPFVNGAYLVHKNLAADLIDIFAGISQSPWQKGFNDPDLFA  
 SNLRTLGI FMHVTNQAYWGRVLDREHMPVDRIHPQLWQPEWNRPDWEEDYLDSDYWRVLEPETEMDEPCP  
 DVVAFPFSSKGGFDMIEEMEHYKWSGGNEAHTDERLAGGYENVPTVDIHMNIQIGLQDEWLYVVKTYAA  
 PMVSKFYTYGPNKPNLMFVVRYKPGEQDRLRPHHDSSTWTFQIALNRPNI DFEGGTYFTRYKCSVVG  
 SATEQDSRSLEVKQGMGFAPGRLTHQHAGLPTTKGTRYILVNFMDA

>E4YKN2\_OIKDI

MTKQRDKIALCPAEIFGLIKENRIERETIILGIQNVSKSSIRVSI LFPENRWLLVEQNWPNQVPPGL  
 EVNAVISIDPNHFDAFPFQLGDLRIKVDGIVSFPLQATSSRPILIEKSLNFGKVSNSNI IKKKLK  
 ITNRGNERGFFEIKNPENEAVQFSSYSGFVEPKNEIHLTAKMIADCRKEINEEIKINLGDRTERVKITG  
 AVISRKLRLNTEILQLGDFVASAQGRETVFLENTPDSIQWISKIPFEADGVEIGPFESANEIIQIIPSS  
 GTLLPGEKQTLVKVESKKKLEKFTELIFKVVFGVVGKAFSESSTVGLFVTANLFPPLKLIKSSPAKNVKQ  
 SSKITKIYFGEAVLGSSPNVILDFENKTGIEINLQSTKTAHFVSPKNLIIGPDETKKVTFTMDPSQIGN  
 LSSRFDFLVVVGKTSKVVEKAKFLLEGHVKAKKADLHKTEEKIKKKETLAALKPP

>E4YKP0\_OIKDI

MGDPRPDIPIPQGLQQLMQDFVVTVLREQPDDVVGMAAEYFTKLKESREEMSSGSKVNFEPPEEDEDMD  
 PEDEEFLRRMREKQKYGRRKSVSAEGYDPDKDEDDDAEERIVNPKSDEQRNRLIAACQKVLLFNRLDKD  
 QFNQVLDAMFEHVCQPGDSVINEGDDGNFYVIESGNYDVYKVIINGDNLKVASYDNKGSFGELALMYNAP  
 RAATVSSVDGGTLWALDRQTYVRIIVRANAKRRMYEQFLQNVHILQTLEEFERQKVADAMEPKEFEDGE  
 I I IQGGDTKLDYFYFVMEGEVKYVLTDDDDVEKEIKRDTAGGYFGELALIQDKPRAVTVSSVGVTKCGCL  
 DVQAFERLLGPCKEIMKRNVDLYAKELEQVSSKQPAEASSPETS

>E4YKP2\_OIKDI

MKCVILVAGHTLLENEIREKGPKELVGPAVGGKKILDIIWKIVNQRTLFSVYLVNADKYKYERWAT

ANDFPVSNINDGSTSFHNSLGAEDLQLVLNTAEISEDIVVAGDMLFEEKSVDMCQIIQFYRRFTKYQ  
YELSVWYWRKWSRPQRFAVYSVKNMYKFWKIEKFLRNFEFGFYN

>E4YKP5\_OIKDI

MSLPPEQQITNFLKENPLVCSILEDDVEKMENTILESNPNLNVSKQDNHKQTPHYAAFIGNENTCVTLIR  
HGAQIDVKDNI GLTPLHRACAADRAQAVEVLIENGADCSIRNRNWETAWHIAAAHGAVSCLQKLLSKTGN  
VNIQDKGRSALHHAAVKGDQVTEFLIENGINVANCDRQRALHWAASAGHSQVVELLI THGADVNAK  
DAFSNTALHFCARNGYQMVIEQLIHSNSNLDLQNSNGESALHLAAKYGHAECVDILLKCGARTCRADANG  
KTPLHCAVQKKAACHVEVLLQFENHKEEKAVNLADELGNTALHYAAELDDFDLVQRLLQNRAPNLENKL  
GITPFHVAAMCCKDI INILLQAGAVPKVDKERSILHFAALGGRIGVMDILANIDPRASYSQFSADGP  
FSADEPFVGGGRVIFGRREIFGGRAFFRRTSDFRKTSHFSANEPFFGGRGCFRIRFSSVRSSVRANFLNAR  
PVFELERVDSSGKSVLHYAAIGQKVMVANLLSLLPKSFVNKIDKDGKTPHYAATNSYFLHVQKSSKKS  
AEIDNSRNGVFDHEQQSAAICEIFLQNGASVEIRDKNLTALHCAAASNNSLEILHEQDHSVTNISLL  
VVACLQKCI AVVEKLLQDNPDILARDSTNKGEFFSRVAISDRQNRRLVSGKXXXXXXXXXXXXXXXXXX  
XXXXXXXXXXXXXXXXXXXXXXXXXXXXXXXXXXXXXXXXXXXXXXXXXXXXXXXXXXXXXXXXXXXXXXXXXX  
XXXXXXXXXXXXXXXXXXXXXXXXXXXXXXXXXXXXXXXXXXXXXXXXXXXXXXXXXXXXXXXXXXXXXXXXXX  
XXXXXXXXXXXXXXXXXXXXXXXXXXXXPKKFANSVENINRFF

>E4YKP8\_OIKDI

MDTVTEWEMAIAMALMGGIGI IHSNNTAEEQASHVRRVKYEQGFINNVPVTLRPSDTRDLETKEKHGF  
SGIPITESNEKHSKLLGLVTSRDI DFLKEHEHETKLEQVMTPRSELVTAPTSTLNEANVILMKSCKGKL  
PVLNDKEIHKYPHLQVIGGNVVTQNAFNLIKAGVDCLRIGMGSGSICITQEVCAVGRPQGTAVFRVCEL  
AKKYGVPCIADGGIKNVGHVTKALS LGASTVMMGSLAATSESPGEYFYQDGVRLKRYRGMGLDAMKHK  
ASQSRVYFSDKSQIKVAQGVSGAVQDRGSYDYIPYLIAGVKHGKQDLGIKSIREMHKCLYSGELRFERRS  
AAARGEGGVHGLHHEKLY

>E4YKQ0\_OIKDI

MFSVAERPVGIDMGGIPMWRNQAIRWLQSLDLGQYAEKVKDSSIVSDPEKSLGMTNSFHKKLRLAIR  
ALDDELKSNLGTGWCNLEEIGLPEYKAFHEGIDGRVLNLLTMEELLALGVTSQLHYLSIKRGIQV  
LRQSKFNPHTMVCRAGSCDQIERWSIFRIMDWLRTIELSEYAPNLRGSGVHGGLIALEPGFGHDHLANLL  
DINPKKTLRKLQTSFNQLSDQQFETKRDI LRNGMPMLTARLKRKKKTFGSKKSAGSGGDELVC  
PLNLGRHDDPSRRPSHGSKT

>E4YKQ4\_OIKDI

MSRRTSQATSRASFSPVQRDPNMKETVISFNKGGQNSATKDGSEMFLRSLFSGFTAESYIEAKTE  
ASNVKLAVKEEISGTNTAFYDNLVRFPLTISLLEMLPKEKKQKEDKI ICHREVHRDLSPFLKGRKISES  
VREVSKEAPNIQVNLEISVSIPELKPFELEKNRIMTLRLIHASGVPDSWLGSFNACLPIQKEENETAA  
VKFSGKAEGAFNTSEKMSLYWSGLKNTTEKII SKENYKLPENGAAPANSDGECPNIVFSSERKMIMSAD  
DCRAFEARIAKVSNNLPLEISKYFHPFRKDAKKGKAKPDDGELHNGIALINLESLLYPGVKTVSGKFK  
VNPFTQNLIRAGYGESITASSCNSGTILSMGSTSRNDSSAGGVSDNRPEsrQAAQDALPYKELNSSVF  
FEISFSRALVDRATLQDLKLNATLIPMRPKIPRKYGAEISVEEYKSQITEVAKLVLAETRAFAPSTKG  
ESFEKSLLYQLNRTGKHAQFHENF

>E4YKQ5\_OIKDI

MSGDFKRVTINFFFIKKSGCGDGSFSLRLNSFSSIYEIDYYESLTYFEAEKFCQIIGGTLLEKHSSFF  
 PFDLWTPKRDGKCVKIRAFGGGEIITDCEESLRFACKKQKQLLSYVELDGFIFEIKFDEKCRDKFFNFVK  
 KEEFFIVDERTGSRQTIKEIVTKYWPDDQTKPVNLRIVHETELDGKSYSLIDDFSISQSKIQRVRRFSV  
 QAKSSSSHVYLSKIYLLLFLLILIRFFNL

>E4YKR1\_OIKDI

MKNIIFESNSVGDIDGKISNIENFAKEFKIRKLIIEGVIMAVMAGPVEKNPVIGFDLRIKRIESQNCFF  
 KQIKGFIVQKMIIRAIQEALKRANCIVKEPRMKFQLSLYSIEHRGKVMELLAENDCEILSEDPEGEMWSI  
 SGLLNVSQELKIQRLLAVTRGNAYLETSYYGL

>E4YKR2\_OIKDI

MCGIGVFNCEPDDQTVKSLKRRGPDFYHQETFTVAGQTVTVIATVLSHQGEGIIAQPIVTEDFIFLWNG  
 EVYDHPKFEPEKHEDTNWFFENVASHMTGENQAGIEIMKEIRGEFAFCTIDRRSGEYIFGRDLRGRSLL  
 LYAYDNQLILTSSSSGYHFIELPADGFYKSNLQRMNKLERIAFQAQTKVDEHLLLEEFVFSNASNDMLAIN  
 GVKEGKLHSLPVQTMKTIQCDLWNFDQNHGGQCTGDLLERLEIVFRKAVERRVMCRKSGIGVLFSGGLDC  
 SLVVATVLEIFRDKPKTATIVYLYSVAFGDNEDKCEKCPDRLTACSAYEIKRNHPSAEIILVKENISKE  
 QLTKVRAEKIKHLISPRVSVLDDSIGSALYFAAHSQVGSDCRLLSGLGADELFCGYSSHRRVHDREGLD  
 ALEFEVQSHIERIAERNCARDREVISDSGREYRMPFLDLDFIRFSSSIPILDRCDLTKGRGEGEKQLLRQ  
 LAACKGLKIISSFEKRAIQFGSRIAKMEDKKVKGNDICANLKK

>E4YKR7\_OIKDI

MKSFSSKSAVLATVALAQTGDEFENYLNLEEIADILGAYDLGEYNDYGTNYGGQVSSAEDAPVTAEE  
 LLNVYNTVETTEVIGEYEEAIDGQERRPLANYATFEKINIAPDHNFCRTCSGVSYGTCIGNDAYETC  
 NDAQDVCEVKYRFDSAGEVLFWSGCKQRNAQLQDEQGNFVGGRRFLNRCKSSKVPNRWLAGSECTFCSLM  
 SPTGHTSNILDDATNIVKDISSVTHSLLPAITKTQLLENPEYMDASATNYILGGQSYV

>E4YKS8\_OIKDI

MKLLSTLLGLSLAQNEEERSLFGTEEINFDEQNRFLQEQRFAEEIKGLISGSLSCIAEDARIIGGNEADK  
 LTRWIAFLHKNNCGGTVLNSRMVATAGHCCTWDFNRYPEKYEMAIGRHYREENAPRNIAGPYSRIYEA  
 KVVQHPDVNFWFENDMCLIFTKEEIEFNPGVAPACTAEEPKLGKLCYIAGWGAQSTDGSSASEVLNEA  
 EVEILDSETCFHNIQTKLREVSPSHSNFVVPDSWHETMMCAGNWAGGVDSQCQDSSGGPLVCIEDNRPILH  
 GVVSWGMCALPGLPGVYMRVSNYSWIAAEYEKRVNGDTSDDICDPGQIYFDDVKFGSWDCTDEMIC  
 EWVCNDGGRTGVVTTCDAGDWSKPSKCSILNRCKSSLKGGDCRKHCHADRPPPAVGATWDCSGSGSRKTC  
 HLVCDSKNGQSTSCDRKNSAGWSDVNASCSPSEGENTTPSVPLDLELLGDGTFEKEAKKKNWQGHLLQF  
 KTKFDERKKNATAYLLCEDGETEIKKIKIDCTKKVKIHKKTGIVETSSLKCKAKPYAQKHVDKAC

>E4YKT1\_OIKDI

MHRNDFTTIQDGTIFLFGGYSDLVQEYTHRIWKYLPESHSWTIEGNMLVNRMNFAFALVNGNVFVGGF  
 YELNHESYDFETGLSTALDTTLESKLFVELVPFSFLGC

>E4YKT4\_OIKDI

MEKIKNVTVSRNGTIFEGFTGRYTSYEETETLCLSKGAKMPWFEMIGSQFSEPVWIKSSADFMKRTINA  
 SDEIGREKLERLMNEFLDENAPLELNASLLECAKNDDEELKKILPKNLDLFGRKGENNFEKFASENPLVDF  
 KRCFQQHVSQKQNGLSIRSKNPVSSQFISKSNRPKNYQRINFLSKIRSQKHAKLPKNILWNDQFWNTFQI

QAHTLGHLQVNIITYDQTKRIITGSDESLEKIWSAVTGMLLMLTRGHEGEINDLQVHPDNLLASCDD  
 KKAIRIWCLRSGATVTCMLGQHTAHNITSISWPGMLCVESTYIRPLVSTGNDGTVVFWSDENDKSFIL  
 EAPPKFTERTKPGDRAVQQAWSKGGRLIAVGFSDGRIRVYMILKPDSPRGVDKIAELDVHTSCVSSIEFN  
 QMQSTKTPPALLSTSFDFGFAIIWRMRNRWVKVQKIDCVRETDPNADPKKRPKVNDGIWLKNDELICVALV  
 GATHQNIKIFNSATSDLVTTLCFHTQTIQNLKAHPKIPHVFASSGCDGLIWIWDLRSKKIAEVYFPST  
 IESGEQMSIHDRWSSDGTKII SADSQGHMSISGFGKDVKLSQLPDELFFETDYHPLIRDREGFVDEQT  
 GLTPHLQNGMFTNSQNEPYLGRVNDDRTRRQMAEEGQRDVLGDRIRQLDLEMTAAEIDQAGEGGTPMNV  
 DENSVHLDMSVLTDFVQRRSQSIKPKSWCNKDFCEVLPLKEVQKRDSLQKLSKAEERWFKEGLDCDV  
 MEIEEIHVTEDSVPQINSSQRRANRRRQRATDVVEPELPPESDEDHSIQGSDEEFNLNSSAEQRELTRVN  
 RRRAPRGYVVDDEPAEDDSDVEEASSEESTTQENTSSSEYVPTLEEPSTEANSTRSRRARTSREPQAPA  
 SSSRQRKKRIILDESEGENEQANLSSLEENKEEEQVPGPSSRILIPSSTSSFRKKVAFSESDDSDNSM  
 KKSDTSSIDPLVQMSNSKKRNRRTNKRLSESSSNEPHYHSLIESPGRGHLQWIRQTQPLRCPFIPQ  
 IGDEVYIYPSAHLQFVKELENQKLTSLRKFHRVPTQFKNSCLMDMDILCVVEELEIELMNEKKFDPARW  
 CSISLKCIIHDEIDLKKFTEALKLGSPK

>E4YKU0\_OIKDI

MKFTAEFATFIFALEVFLAKILVRVILAALLSVNSTRSPSQLVSSNADRTFFKASCHLEKDAERAFLA  
 FTRI

>E4YKU4\_OIKDI

MIRCLFILTNTLAFGGTALIGLCAWIIVDAESIGIEANLITDKLQEIILDDVYTLNEIWEENVDIPEIF  
 EEIFEWIGYATYIALSAGVLVAIISQDFQICIFFFKKNENILLISEKFGHFLMNLFFRQF

>E4YKU5\_OIKDI

MKCFSNLFLPIFIQLIDPSYGAFQIFGSGGRSSANNVETRPFTPVRADVREFGIKQPVVIERPPTRAPA  
 AAPAPQTSRSPSRFNSQKEPSSGPKFQTSSGSPATSLSKIAKPSTSGGWKPSWSSARKPSSPHHGPS  
 FRELGKLGGEIEVPRSSVGNASSSFANRNSNSFSFTSSVSEETGWKGISQSQPTASSFDRLDRFMPQEN  
 IRRPEAVNTFQSREPQLPSWNGDNLWDQGRTPAPTGPSWRTRATIAPTQSTRLYAPTTRSPI SFQTQ  
 KFQFDSNSRLESARKQLLLQSQQNERMSESRSNTFLEQYSSGPQQSAGFSSNGKDRSLLNYQNSFRAE  
 DVRSGMVAENRGQVRIEKPPEVRTTGNPFDAEVSDDQWEGETEAGIYHGLEEKDRQEYKNKNPKWADLDG  
 DGVLEFDPMPDPYPAYKFFETETRWESD TDGGYIGILYVPI TRVDGWSITLKFMPVTKLENWEYSPTVQ  
 SPSDGVTCMLHNNHWNGVRMQGTQMRIRIMVEFDRTPGMPPGMIQPAAALLGTIWYPDGSNANYDEGVS  
 RNTVSYNEGFSNLPKPETASNKSYTDPVNERLEQTKSQGDNIKWNAAMFQDNYRSQLSWLDTPLFGE  
 PTEAPKASTTADPYAGLSSNLKGRTPNQINFSGNLAGVSGISSAQKTLDEIAMRLMLEENTQTDII  
 MNAFGEVRTTRSTTTTTTIVATTKRTLTMCEKRSIAERRMCKQPSCFRHMCLENGDFSPSQCWPKVGLCWC  
 VTIDGLKLSTTIRKMIKFKSSSCQLTYDPTGIAASRDANTVSAPSNPQQSYGSSQDNTGYESSQISQSYE  
 EVQVKEAPTPTVYKYDRYSKHDWSQVIKLSSQFYFAQMSVVLKLPIDHPVRWRLSAHENDGRPCGVDS  
 GGFYDSGDFMKYTFPMAWTMTLSWGAIEHRSTLENVGRWKDLSKIITGAEYLLKTNPSRVLVYIVGD  
 PEIDHQYWRKPSKDQNSIRPCLKVTQWAHGTDLAAEVAGALAAASMVVSDEALASKCWHKAQELYDFGD  
 KHRGKYSVVREVKDYFQTFKDYPSNDYTDDELGWGALWLYKASKVTRNFPARSAYTVFQLGKRVDSFNW  
 DQKHAGVQLLLAELTQEPKYIADISTFCDYNMPHGAKYTPGGLLIEKWGVLRHSLNIAYICLRAGTLM  
 GMDSIRQSNYRKFAMSQLDYMLGGQGRSFLVGYGKNFPDRPHHRTASC SLVGPCSWEAFKAMLGALVGG  
 PDENDIFVNNRTDFVRNEVALDYNAALTSALMLDLERGNV

>E4YKU8\_OIKDI

MEGNAKTVVGLVDGGVKEFACFLSKINCARNHKEHNVDSFQYSKSVYFRTIKPIKCGQELLVRYGDVYEK  
QLKIEFNPNPKTTYFQENQDGLFFCPLNICFHTRDAFNHKSSELNCKILKVIKKTGTFIFGSKDEPYYI  
CASCGQCYSIDLCLLQYHQIEHDELRFKFGCDKCCLRFLREEHYQKHMWCKPDFPS

>E4YKU9\_OIKDI

MNAADILLSVGGYTCLWALLFFLAPFVFRKCAFSADIYSKLTAKQIDLCRATSIIFSATCAWSFGAWN  
HKNSAYAPLNEPNETASLPLLFMTAFFTLDTIVCIYLREEYGATTYQYLCHHVAAILGFYNSLKYQECL  
WFANYRLLSELSTPLINVRAIMNAFNLKEYAGVYSANRVLTMFAFFFSRIATIPYFWMLTYRRYDDLIN  
CDWKIIGMLIVSGIVLDFLNIQWVFLIMKIASVEFKKIPKIAKEKTETLKLISLREKKNVYQTIQTAKT  
FRENVSYRINRVRRLSAMPRE

>E4YKV2\_OIKDI

MSKNLSKSEDKKTTTLGSHGYIAPEVYDSARYGKADIWSFGVMIYEMTEKKLLIEAEDSSDLKEKLE  
YELDADTIESDAKGLLIKALKTDPKNRASARKLKRTSFFEEITFENLREQDSPVDFKPEFGLTDPQPLR  
SWFIK

>E4YKX2\_OIKDI

MVNRASHAGSWYSGDPRELENQLKNWISKAKFEKKAKAVIVPHAGYAYSAPTAAWSFLQLDAQTTKKIF  
VIGPSHHVYLPNCALPVVKECETPLGNLRIDKDIVTELHATGLFCTMDVPTDEEHSIEMQLPFLAHIFK  
NRLEEVSVVPIMVGSIKQEKEADYAQVFAKYLNDPEVVFVSSDFCHWGKFRYTYRLEEYEQIFESIDA  
VDREGMDHIASKNLSNFHNYLRRTKNTICGRNPICLLLATINLLEQKVNMQSQIKFLKYAQSSQVRS  
PNDSSVSYASAVCYL

>E4YKX7\_OIKDI

MQKLNFYFISCGVLYVSFPYVVLIVSVISLSAYIAAQSIPSGKITKHVPFIYLNLLSMLFGLGALIYAN  
SFSFWFLFLSAPPALFFFSTEKISDLHAMRAEMAYTIVE

>E4YKX8\_OIKDI

MAAHPSPNPNFDSNYGSQWGSTAPPPYGNAPLPGQPPVNIQMPITLTNPDRLSTHSMVCVCPHCRYEG  
ESVITKVTGWGNHLAACGTCVFWGLWAGCCLISYLDILKDTEHQCANCKKLIGIKKILY

>E4YKY6\_OIKDI

MSNVEIFDESDNPNFVDQYIVTNLLQKGLPGEAAPLRNLPLIHRYSMNSPTIFKILYSFRRAAS

>E4YKY8\_OIKDI

MQFYIILFANFSFFWRTWHLQLRLLDSKMEKKSQKLEADLRSSGKHAERIQELQRHQQAQFQSFQDL  
EERISAVARVHLGEQLEGVNTPREHAADAQRLMGYFSEFLSGNINSVLTNPHRINETADVVRKLHLI  
AQELPDTNFQEVKLSILNQYKKEKELLNKFRSAGENNDIEQMQLTAETLSRYQNYQLCVDAYVEEALRQ  
IDVDESIFEQITSLIDGKSSQISKVFNQVGLKLIQSCYDNLGFIHKKLDPLKRKNLELYLSECQK  
LYEKTSALSAALSKHRPGSGKSTFTKKLQRSVDFDFISSYLTDEEMFLKRSKELLDYRERQGEHGRG  
LGSEMASKVGSIFGSDNRKVEILISEELAASVLQETHSAFRRCGALSPSNLIAENGLKIFNILLEFLIKQ  
HVQYAIIDFGLTQAPSAEPKTEPDMSMFLLVQEANTVWHLFEKQFNDDLPLTAQSPIHAEAVQARKSMKD  
AMETSMSALEKTITSAIGYAKNILKSEQKRNDFLSDELASQATPACRTAVEYLHKVISSMKKHLGENTI

DLILIALGGKFYTLIYEHLQAFQFSSMGGMLAICDIKEYRTAAKSLNSVLVDSKFDLHALCNLLIAVPE  
NLRQVCTGDQLANLDKNVLFVFLRDTDYKANNLQRLFT

>TANC2\_HUMAN

MFRNSLKMLLTGGKSSRKNRSDGGSEPPDRRQSSVDSRQSRSGGGISTESDCAFEPDYAVPPLPVSE  
GDAEQELGPPPSVDEAANTLMTRLGFLLEKGVTEVQPGDQYSMEVQDENQTSAITQRISPCSTLTSSTAS  
PPASSPCSTLPPISTNATAKDCSYGAVTSPTSTLESRDSGIATLTSYSENVERTKYAGESSELKSGSGN  
IKPWQSQKSSMDSCLYRVNENMTASTYSLNKIPERNLETVLSQSVQSIPLYLMPRPNSVAATSSAHLDEL  
AYLDEQRHTPLRTSLRMPRQSMGGARTQQDLRVRFAPYRPPDISLKPLLFEVPSITTESVVFGRDWFHE  
IDAQLQSSNASVNGVIVGNIGFGKTAISRVLVALSCHGTRMRQIASDSPHASPKHVDANRELPLTQPP  
SAHSSITSGSCPGETEMRRRQEEAMRRLASQVVAYHYCQADNAYTCLVPEFVHVAALLCRSPQLTAYRE  
QLLREPHLQSMLSLRSCVQDPMASFRRGVLEPLENLHKKERKIPDEDFIILIDGLNEAEFHKPDYGDIVS  
FLSKMIGKFPWSLKLIVTVRSLQEITKLLPFHRIFLDRLENEAIDQDLQAYILHRIHSSSEIQNNISL  
NGKMDNTTFGKLSHLKTLQSGSYLYLKLTFDLIEKGYLVKSSSYKVPVSLSEVYLLQCNMKFPTQSS  
FDRVMPLLNVAVASLHPLTDEHIFQAINAGSIEGTLEWEDFQQRMENLSMFLIKRRDMTRMFVHPSFREW  
LIWREEGEKTKFLCDPRSGHTLLAFWFSRQEGKLNQQTIELGHHILKAHIFKGLSKKVGVSISILQGLW  
ISYSTEGLSMALASLRNLYTPNIKVSRLILGGANINYRTEVLNNAPILCVQSHLGYTEMVALLLEFGAN  
VDASSEGLTPLGYAAAAGYLSIVVLLCKKRAKVDHLDKNGQCALVHAALRGHLEVVKFLIQCDWTMAGQ  
QQGVFKKSHAIQQALIAAASMGYTEIVSYLLDLEKDEEEVERAQINSFDSLWGETALAAAAGRGKLEVC  
RLLLEQGAAVAQPNRRGAVPLFSTVRQGHQIVDLLLLTHGADVNMAKQGRTPLMMAASEGHLGTVDLFL  
AQQASIALMDEKGLTALSWACKGHLVVRSLVDNGAATDHADKNGRTPDLAAFYGDAEVVQFLVDHGA  
MIEHVDYSGMRPLDRAVGCNRTSVVVTLKKGAKIGPATWAMATSKPDIIMILLSKLMEEGDMFYKKGKV  
KEAAQRYQYALKKFPREGFGEDLKTFRLEKVSLLNLSRCRRKMNDFGMAEEFATKALELKPKSYEAYYA  
RARAKRSSRQFAAALEDLNEAIKLCPNREIQRLLRVEEECRMQQPQQPPPPPPQPPQQLPEEAEPEPQ  
HEDIYSVDIFEEYELEQDVENVISGLQTEARPSQGLPVIQSPSSPHRDSAYISSSPLGSHQVDFRS  
SSSVGSPTRQTYQSTSPALSPHQNSHYRSPPHSTPAHQGGSYRFSPPPVGQGGKEYSPPPSPLRRGP  
QYRASPPEASMSVYRSQSGSPVRYQQETSVSQPLGRPKSPLSKMAQRPYQMPQLPVAVPQQGLRLQPAKA  
QIVRSNQSPAVHSSVTIPTGAYGQVAHSMASKYSSQGDIGVVSQRLVYQGSIGGIVGDGRPVQHVQAS  
LSAGAIQHGGLTKEDLPQRSSAYRGGVRYSTPQIGRSQSASYYPVCHSKLDLERSSSQLGSPDVSHL  
IRRPISVNPNEIKPHPTPRLLHSQSVGLRFSPSSNISSTSNLPTFRPSSSIQQMEIPLKPAYERS  
DELSPVSPTQGGYSEPTSRSTPFMGIIDKTARTQQYPHLHQQRNWAVSSVDTVLSPTSPGNLPQES  
FSPSSISNIAFYNKTNNAQNGHLEDDYSPHMLANGSRGDLLEVSQASSYPDVKVARTLPVAQAYQ  
DNLYRQLSRDSRQGTSPKPKRPFVESNV

>K1632\_HUMAN

MAEAVKQRRAKAKASRTKTKEKKKYETPQREESSEVSLPKTSREQEIPSLACEFKGDHLKVVTDSQLQD  
DASGQNESEMFDVPLTSLTISNEESLTCNTEPPKEGGEARPCVGDASVTPKVHPGDNVGTKVETPKNFTE  
VEENMSVQGLSESAPQSNFSYTPAMENIQVRETQNSKEDKQGLVCSSEVPQNVGLQSSCPAKHGFQTP  
RVKKLYPQLPAEITAGEAPALVAVKPLLRSERLYPELPSQLELVPFTKEQLKILEPGSWLENVESYLEEFD  
SMAHQDRHEFYELLLNYSRCRKQLLLAEAEELLTSLSDCQNAKSRLWQFKEEQMSVQGCADQVKVFSYHR  
YQRVEMNENALVELKLFDAKSEHLHQTLALHSYTSVLSRLQVESYIYALLSSAVLRSSAIHQGRASK  
QTESIPSDLCQLKECISVLFMFTRRVNEDTQFHDDILLWLQKLVSVLQRVGCPGDHLFLLNHILRCPAGV  
SKWAVPFIQIKVLHNPVSGVHFHMQSLALLMSPVKNRAEFMCHMKPSEKPSSSGPGSGTWTLVDEGGED  
EDPETSWILLNEDDLVTILAQFPFHELQHLGFKAKGDYLPETTRPQEMMKIFAFANSLVELLAVGLET



FNRARYRQFVKRIGYMIRMTLGYSVDHWAQYVSHNQSGSLAQQPYSMEKLQVEFDELFLRAVLHVLKAKR  
 LGIWLFMSEMPFGTSLVQMLWKLFLYLMHQVESENLLQSSSLQPAQCKQQLQDPEHFTNFEKCLSSMNSS  
 EEICLLTTFAQMAQARRTNVDEDFIKIIVLEIYEVSIVTLSTRETFSKVGRELLGTITAVHPEIISVLLD  
 RVQETIDQVGMVSLYLFKELPLYLWQPSASEIAVIRDWLLNYNLTVVKNKLACVILEGLNWGFAKQATLH  
 LDQAVHAEVALMVLEAYQKYLAQKPYAGILSESMKQVSYLASIVRYGETPETSFNQWAWNLILRLKLHKN  
 DYGIQPNCPAVPFSVTVPDMTESPTFHPLLKAVKAGMPIGCYLALSMTAVGHSIEKFAEGIPLLGLLVQ  
 SRHLRTVVHVLDKILPLFYPCQYLLKNEQFLSHLLLFLHLDGSGVPQGVTTQQVTHKVAQHLTGASHGDNV  
 KLLNSMIQAHISVSTQPNEVGPVAVLEFWVQALISQHLWYREQPILFLMDHLCKAAQMLQEDCIQKLLY  
 QQHKNALGYHCDRSLSSLSVSWIVAGNITPSFVEGLATPTQVWFAWTVLNMESIFEEDSQLRRVIEGELV  
 INSAFTPDQALKKAQTQLKLPVPSLQRLLIYRWAHQALVTPSDHPLPLIWQKFFLLYLHRPGPYGLP  
 IDGCIQRFFQSPAHNLLKEMKRRLTEVADFHHAASKALRVAEGSEGLPESHSGTPGYLTSPELHKEL  
 VRLFNVIILWLEDENFQKGDYIPSLPKHYDIHRLAKVMQNQQDLWMEYLNMERIYHEFQETVGLWTQAK  
 LESHSTPCSLSVQLDFTDPLLAKERVLSNLRKHEAPQPPLALHPTKPPVPVISSAVLLSQKDATQLVCTD  
 LNLQQAARTAAALRESQVALDGEDTTPKQYVNRREEQTLHLECRGSSGKCKQGAAVTVQFEGMHKN  
 EAISQQLHVLKREVKQLQAEAAKPPSLNIVEAAVHAENLITALVNAYKLPQTPGIQKVGISLFFITVDYV  
 SDETRHPPTQRFFTSCEIILGQVVISGKSECRKVLETILKNSRLCSLLSPFFTPNAAPAEFIQLYEQV  
 VKFLSEDNSDMIFMLLTKFDLKQWLSATKPPLSRTRLLESIHLALTAWGLEPDEDILMPFNLCKHWTY  
 LLLYQFPDQYSDILRLLMQSSAEQLLSPECWKATLRALGCCAPSCQQGAASTEGAVLPSSSDALLSDKQV  
 METIQWLSDFFYKRLSKMDFKSFGLFSKWSPYMADVKTFLGYLVKRLIDLEMTCLAQDPTASRKTVLKS  
 LHSVIIQLFKPWILVLEDNESSQQRHYPWLESDEVVASSIVQLFTDCIDSLHESFKDKLLPGDAGALWLH  
 LMHYCEACTAPKMEPFIYAFHSTYRKLWKDLHPDQMLMEAFFKVERGSPKSCFLFLGSLVCEVNWVSV  
 LSDAWNSSPHPETRSMIVCLLMMILLAKEVQLVDQTDSPLLSLLGQTSSLSWHLVDIVSYQSVLSYFSS  
 HYPPIILAKESYAEIMKLLKVSAGLSIPTDSQKHLDAVPKCAFTHQMVQFLSTLEQNGKITLAVLEQ  
 EMSKLLDDIIVFNPPDMDSQTRHMLSSLFMEVLMNNATIPTAEFLRGSIRTWIGQKMHGLVVLPLLT  
 AACQSLASVRHMAETTEACITAYFKESPLNQSGWGPILVSLQVPELTMEEFLQECLTLGSYLTLYVYLL  
 QCLNSEQTLRNEMKVLILSKWLEQVYSSVEEEAKLFLWWHQVLQLSLIQTEQNDSVLTESVIRILLV  
 QSRQNLVAEERLSSGILGAIQGRKSPLSNRFRVVARMAAFLSVQVPMEDQIRLRPGSELHLTPKAQQA  
 LNALESMASSKQYVEYQDQILQATQFIRHPGHCLQDGKSFLALLVNCLYPEVHYLDHIR

>MOV10\_HUMAN

MPSKFSQRQLREAGQCFESFLVVRGLDMETDRERLRTIYNRDFKISFGTPAPGFSMLYGMKIANLAYVT  
 KTRVRFRLDRWADVRFPEKRRMKLGSDISKHHKSLAKIFYDRAEYLHGKHGVDVEVQGPHEARDGQLL  
 IRLDLNRKEVLTLLRNRGGTQSVTLTHLPLCRTPQFAFYNEQDELPCPLGPGECYELHVHCKTSFVGYF  
 PATVLWELLGPGESGSEGAGTFYIARFLAAVAHSPLAAQKPMTPFKRTRITGNPVVTNRIEEGERPDRA  
 KGYDLELSMALGTYPPPRLRQLLPMLLQGTSTIFTAPKEIAEIKAQLETALKWRNYEVKLRLLHLEELQ  
 MEHDIRHYDLESVPMTWDPVDQNPRLLTLEVPGVTERSPSVLRGDHLFALLSSETHQEDPITYKGFVHKV  
 ELDRVKLSFMSLLSRFVDGLTFKVNFTFNQPLRVQHRALELTGRWLLWPMLFPVAPRDVPLPSDVKL  
 KLYDRSLESNPEQLQAMRHIVTGTTRPAPYIIFGPPGTGKTVTLVEAIKQVVKHLPKAHILACAPSNSGA  
 DLLCQRLRVHLPSSIYRLLAPSRDIRMVPEDIKPCCNWDAKKGEYVFPAKKKLQEYRVLITTLITAGRLV  
 SAQFPIDHFTHFIDEAGHCMEPELSVAIAGLMEVKETGDPGGQLVLAGDPRQLGPVLRSPLTQKHGLGY  
 SLLERLLTNSLYKKGPDGYDPQFITKLLRNYSHTILDIPNQLYEGELQACADVDRERFCRWAGLP  
 RQGFPPIIFHGMKDEREGNSPFFNPEEAATVTSYLKLLLAPSSKKGKARLSPRSVGVISPYRKQVEKI  
 RYCITKLDRELRLDDIKDLKVGVSVEEFQGGQERSVILISTVRSSQSFVQLDLDFNLGFLKNPKRFNAV  
 T RAKALLIIVGNPLLLGHDPDWKVFLEFCKENGGYTGCPFAKLDLQGGQNLQGLSKLSPSTSGPHSHDY

LPQERE GEGGLSLQVEPEWRNEL

>ZN532\_HUMAN

MTMGDMKTPDFD LLA AFDIPDMVDPKAAIESGHDDHESHMKQNAHGEDD SHAPSSSDVGVSVIVKNVRN  
 IDSSEGGEKDGHNPTGNGLHNGFLTASSLDSYSKDGAKSLKGDVPASEVTLKDSTFSQFSPISSAEFFDD  
 DEKIEVDDPPDKEDMRSSFRSNVLTGSAPQQDYDKLKALGGENS SKTGLSTSGNVEKNKAVKRETEASSI  
 NLSVYEPFKVRKAEDKLKESD KVLN RVLDGKLSSEKNDTSLPSVAPSKTKSSSKLSSCIAAIAALSAK  
 KAASDSCKEPVANSRESSPLKEVNDSPRAADKSPESQNLIDGTKKPSLKQPDSPRSISSENSKSPSS  
 PAGSTPAIPKVRIKTIKTSSGEIKRTVTRVLP EVDLDSGKKPSEQTASVMASVTLLSSPASA AVLSSPP  
 RAPLQSAVVTNAVSPAELTPKQVTIKPVATAFLPVSAVKTAGSQVINLKLANN TVKATVISAASVQSAS  
 SAI IKAANA IQQQTVVVPASSLANAKLVPKTVHLANLNLPPGAQATSELRQVLT KPQQQIKQAI INAAA  
 SQPPKVS RVQVSSSLQSSVVEAFNKVLSVNPVPVYIPNLSPPANAGITLPTRGYKCLECGDSFALEKS  
 LTQHYDRRSVRIEVT CNHCTKNLVFYNKCSLLSHARGHKEKGVMQC SHLILKPV PADQMIVSPSSNTST  
 STSTLQSPVGAGTHTVTIKIQSGITGTVISAPSSTPITPAMPLD EDPSKLCRHS LKCLECNEVFQDETSLA  
 THFQQAADTSGQKTCTICQMLLPNQCSYASHQR IHQHKSPYTCPECGAICRSVHFQTHVTKNCLHYTRRV  
 GFRCVHCNVVYSDVAALKSHIQGSHCEVFYKCPICPMAFKSAPSTHSHAYTQHPGIKIGEPKI IYKCSMC  
 DTVFTLQTL LYRHFQHIENQKVS VFKCPDCSLLYAQKQLMMDHIKSMHGTLSIEGPPNLGINLPLSIK  
 PATQNSANQNKEDTKSMNGKEKLEKKS PPKSMETKKVASPGWTCWECDFMQRDVIYSHVRKEHGK  
 QMKKHPCRQCDKSFSSSHSLCRHNRIKHKGIRKVYACSHCPDSRRTFTKRLMLEKHVQLMHG IKDPDLKE  
 MTDATNEEETEIKEDTKVSPKRKLEEPVLEFRPPRGAITQPLK LKINVFVHKCAVCGFTTENLLQFH  
 EHIPQHKS DGSYQC RECGLCYTSHVLSRHLFIVHKLKEPQPVSKQNGAGEDNQENKPSHEDESPDGA  
 VSDRCKVKCAKTFETEALNTHMRTHGMAFIKSKRMSSAEK

>MTL14\_HUMAN

MDSRLQEIRERQKLRRLQAQQLGAESADSIGAVLNSKDEQREIAETRETCRASYDTSAPNAKRKYLDEG  
 ETDEDKMEYKDELEMQQDEENLPYEEEIYKDSSTFLKGTQSLNPHNDYQH FVDTGHRPQNFIRDVGLA  
 DRFE EYPKRELIRLKD ELIAKSNTPPMYLQADIEAFDIRELTPKFDVILLEP PLEEYRETGITANEKC  
 WTWDDIMKLEIDEIAAPRSFIFLWCGSGEGLDLGRVCLRWGYRRCEDICWIKTNKNNPGTKTLDPKAV  
 FQRTKEHCLMGIKGTVKRSTDGDFIHANVDIDL IITEEPEIGNIEKPV EIFHIIEHFCLGRRRLHLFGRD  
 STIRPGWLVGPTLTNSNYNAETYASYFSAPNSYLTGCTEEIERLRPKSPPPKSKSDRGGGAPRGGGRGG  
 TSAGRGRERNRSNFRGERGGFRGGRGG AHRGGFPPR

>ARGAL\_HUMAN

MASSNPPQPAIGDQLVPGVPGPSSEAEDDPGEAFEFDDSDDEEDTSAALGVPSLAPERDTPPLIHLDS  
 IPVTDPDPAAPP GTGVP AWVSN GDAADA AAFSGARHSSWKRKSSRRIDRFTFPAL EEDVIYDDVPCESPD  
 AHQPGAERNLLYEDAHRAGAPRQAEDLWSSSEFESYSEDSGEEAKPEVEVEPAKHRVSFQPKLSPDLTR  
 LKERYARTKRDILALRVGGRDMQELKHKYDCKMTQLMKA AKSGTKDGLEKTRMAVMRKVSFLHRKDVLDG  
 SEEDMGLLEVSVDIKPPAPELGPMP EGLSPQQVRRHILGSIVQSEGSYVESLKRILQDYRNPLMEME  
 PKALSARKCQVVFVRVKEILHCHSMFQIALSSRVAEWDSTEKIGDLFVASF SKMVL DVYSDYVNNFTSA  
 MSI I KACLTKPAFLFLKRRQVCS PDRVTLYGLMVKPIQRFPQFILLQLDMLKNTPRGHPDRLSLQ LAL  
 TELETLAEKLEQKRLADQVAEIQQLTKSVSDRSSLNKL L TSGQRQLL CETLTETVYGDGRQLIKSKER  
 RVFLNDMLVCANINFK PANHRGQLEISSLVPLGPKYVVKWNTALPQVQVVEVGQDGGTYDKDNVLIQHS  
 GAKKASASGQAQNKVYLGP PRLFQELQDLQKDLAVVEQITLLISTLHGTYQNLNMTVAQDWCLALQRLMR  
 VKEE E IHSANKCRLRLLLPGKPDKSGRPI SFMVVFITPNPLSKISWVNRHLAKI GLREENQPGWLCPDE

DKKSKAPFWCPILACCIPAFSSRALSLQLGALVHSPVNCPLLGFSAVSTSLPQQYLWVGGGQEGAGGQVE  
 IFSLNRPSRPTVKSFPLAAPVLCMEYIPELEEEEAESRDESPTVADPSATVHPTICLGLQDGSILLYSSVD  
 TGTQCLVSCRSPGLQPVLCRHSFPFHLLAGLQDGTAAAYPRTSGGVLWDLESPPVCLTVGPGVVRTLLSL  
 EDVWASCGPWVTVLEATTLQPQQSFEAHQDEAVSVTHMVKAGSGVWMAFSSGTSIRLFHTETLEHLQEI  
 NIATRITFLLPGQKHLCVTSLLICQGLLWVGTDQGVIVLLPVPRLLEGIPKITGKGMVSLNGHCGPVAFLA  
 VATSILAPDILRSDQEEAEGPRAEEDKPDGQAHEPMPDHSVRELTRKKGILLQYRLRSTAHLPGPLLSM  
 REPAPADGAALHSEEDGSIYEMADDPDIWVRSRRCARDAHRKEICSVAIISGGQGYRNFSGALGSSGRQ  
 APCGETDSTLLIWQVPLML

>SMUF1\_HUMAN

MSNPGTRRNGSSIKIRLTVLCAKNLAKKDFRPLDPFAKIVVDGSGQCHSTDTVKNTLDPKWNQHYDLYV  
 GKTDSITISVWNHKKIHKKQGAGFLGCVRLLSNAISRLKDTGYQRLDLCKLNPSDTPAVRGQIVVSLQTR  
 DRITGGSVVDCRGLLENEGTVYEDSGPGRPLSCFMEEPAPYTDSTGAAAGGNCRFVESPQDQRLQAQ  
 RLNRPDVGRSLQTPQNRPHGHQSPPELPEGYEQRTTVQGVYFLHTQTGVSTWHDPRIPSPSGTIPGGDAA  
 FLYEFLLQGHTSEPRDLNSVNCDELGPLPPGWEVRSVSGRIYFVDHNNRTTQFTDPRLHHIMNHQCQLK  
 EPSQPLPLPSEGSLEDEELPAQRYERDLVQKLKVLRHELSQLQPQAGHCRIEVSREEIFEESYRQIMKMR  
 PKDLKKRLMVKFRGEEGLDYGVAREWLYLLCHEMLNPYYGLFQYSTDNIYMLQINPDSSINPDHLSYFH  
 FVGRIMGLAVFHGHYINGGFTVPFYKQLLGKPIQLSDLESVDPELHKSLSVWILENDITPVLDTFCVEHN  
 AFRILQHELKPNGRNVPVTEENKKEYVRLVYVNRWFRGIEAQFLALQKGFNELIPQHLLKPFQKELEL  
 IIGLDKIDLNDWKSNTRLKHCVADSNIWRWFQAVETFDEERRARLLQFVTGSTRVPLQGFKALQGSTG  
 AAGPRLFTIHLIDANTDNLKAHTCFNRIDIPPYESYEKLYEKLLTAVEETCGFAVE

>AN08\_HUMAN

MAEAASGAGGTSLEGERGKRPPPEGEPAAPASGVLDKLFGRLLQAGRYLVSHKAWMKTVPTECDVLMT  
 FPDTTDDHTLLWLLNHIRVGIPELIVQVRHHRHTRAYAFFVTATYESLLRGADELGLRKAVKAIEFGGTR  
 GFSCEEDFIYENVESELRFFTSQERQSIIRFWLQNLRAKQGEALHNVRFLQDQPIPELAARGIIQVFP  
 VHEQRILNRLMKSQVAVCENQPLDDICDYFGVKIAMYFAWLGFYTSAMVYPAVFGSVLYTFTEADQTSR  
 DVSCVVFALFNVIWSTLFLEEWKRRGAELAYKWGTLDSPGEAVEEPRPQFRGVRRISPIITRAEEFYPPW  
 KRLLFQLLVSLPLCLACLVCVFLMLGCFQLQELVLSVKGLPRLARFLPKVMLALLVSVSAEGYKLAIW  
 LNDMENYRLESAYEKHLIIKVVLFQFVNSYLSLFYIGFYLKDMERLKEMLATLLITRQFLQNVREVLQPH  
 LYRRLGRGELGLRAVWELARALLGLSLRRPAPRRLEPQADEGGGGSGGGRRCLSGGCGAPEEEEEAA  
 LVERRRAGEGEGEDGPPGGKEEDEDDEEEDEEEDEEEDEEGGLDCGLRLKVSFAERGAGRRRPG  
 PSPEALLEEGSPTMVEKLEPGVFTLAEEDDEAEGAPGSPEREPPAILFRRAGGEGRDQGPDPGPDPEPG  
 SNSDSTRRQRNRSSWIDPPEEHSPQLTQAELESCMKYEDTFQDYQEMFVQFGYVVLFSAPFLAAL  
 CALVNNLIEIRSDAFKLTGLQRPFGQRVESIGQWQKVMAMGVLAIVVNCYLIGCGQLQRLFPWLSPE  
 AAIVSVVLEHFALLKYLIVHAIIPDIPGWVAEEMAKLEYQRREAFKRHERQAQHRYQQQRRRREEER  
 QRHAEHARREHDSGGREEARAEGSGLDPATSSSEKASAKAGSTAGGHGPERPKRPGSLLAPNNVMKLKQ  
 IIPLQKGLSSGATSSLAAGAGATTRPPAQSPGSDTRLPAFLSFKFLKSPETRRDSERSHSPKAFH  
 AGKLPFGGTRAEPGNGAGGQARPDGTPSSGSSRVQRSGPVDEALAELEAPRPEEGSGTALAPVGAP  
 ALRTRRSRSPAPPPMPLPRPPTPPAGCWQWDGPGWCGGEGAAPRQALAAAECPPCAMAGPPPAPQLPG  
 DASFYSLPPPPLPPTSDPLETPAPSPSPSPQAVCWPSGWH

>TRPM3\_HUMAN

MPEPWGTVYFLGIAQVFSFLFSWWNLEGMNQADAPRPLNWTIRKLCHAAFLPSVRLKKAQKSWIERAFY

KRECVHIIPSTKDPHRCCEGRLIGQHVGLTPSISVLQNEKNESRLSRNDIQSEKWSISKHTQLSPTDAFG  
TIEFQGGGHSNKAMYVRVSFDTKPDLLLHLMTKEWQLELPKLLISVHGGLQNFELQPKLKQVFGKGLIKA  
AMTTGAWIFTGGVNTGVRHVGDAKLDHASKSRGKICTIGIAPWGIVENQEDLIGRDVVRPYQTMNSPMS  
KLTVLNSMHSFILADNGTTGKYGAEVKLRRLQLEKHISLQKINTRCLPFFSLDSRLFYSFWGSCQLDSVG  
IGQGVPVVALIVEGGPNVISIVLEYLRDTPPPVPPVCDGSGRASDILAFGHKYSEEGLINESLRDQLLV  
TIQKTFTYTRTQAQHLFIILMECMKKKELITVFRMGSEGHQDIDLAILTALLKGANASAPDQLSLALAWN  
RVDIARSQIFIYGQWPVGSLEQAMLDALVLDVDFVVKLLIENGVSMSHRFLTISRLEELYNTRHGSPNTL  
YHLVRDVKKGNLPPDYRISLIDIGLVIEYLMGGAYRCNYTRKRFRTLYHNLFGPKRPAKLLGMEDDIP  
LRRGRKTTKKREEEVDIDDDPEINHFPFFHELMVWAVLMKRQKMAFFWQHGEAMAKALVACKLCKA  
MAHEASENDMVDDISQELNHSRDFGQLAVELLDQSYKQDEQLAMKLLTYELKNWSNATCLQLAVAAKHR  
DFIAHTCSQMLLTDMMWRMLMRKNSGLKVILGILLPPSILSLEFKNKDDMPYMSQAQEIHLQEKEAEEP  
EKPTKEKEEEDMELTAMLRNNGESSRKKDEEEVQSKHRLIPLGRKIYEFYNAPIVKFWFYTLAYIGYLM  
LFNYIVLVKMERWPSTQEWIVISYIFTLGIEKMREILMSEPGLLQKVKVWLQYWNVTDLIAILLFSVG  
MILRLQDQPPRSRSDGRVIYCVNIYIYIRLLDIFGVNKYLGPIVMMIGKMMIDMMYFVIIMLVVLSFGVA  
RQAILFPNEEPSWKLAKNIFYMPYMIYGEVFADQIDPPCGQNETREDGKIIQLPPCKTGAWIVPAIMAC  
YLLVANILLVLLIAVFNNTFFEVKISISNQVWKFQRYQLIMTFHERPVLPPPLIFSHMTMIFQHLCCRW  
RKHESDPDERDYGLKLFITDDELKKVHDFEEQCIEEYFREKDDRFNSNDERIRVTSERVENMSMRLEEV  
NEREHSMAKSLQTVDIRLAQLEDLIGRMATALERLTGLERAESNKIRSRTSSDCTDAAYIVRQSSFNSEQE  
GNTFKLQESIDPAGEETMSPTSPTLMPRMRSHSFYSVMKDKGGIEKLESIFKERSLSLHRATSSHSVAK  
EPKAPAAPANTLAIIVPDSRRPSSCIDIYVSAMDELHCDIDPLDNSVNILGLGEPSPSTPVPSTAPSSSAY  
ATLAPTDRPPRSRSDIFEDITSMDTRSFSSDYTHLPECQNPWDSEPPMYHTIERSKSSRYLATTTPFLLEEA  
PIVKSHSFMFSPRSYANFGVPVKTAEYTSITDCIDTRCVNAPQAIADRAAFPGGLGDKVEDLTCCHPE  
REAELSHPSDSEENEAKRRATIAISSQEGDNSERTLSNNITVPKIERANSYSAEEPSAPYAHTRKFSFS  
ISDKLDRQRNTASLRNPFQRSKSSKPEGRGDSLSMRRLSRTSAFQSFESKHN

>GBA2\_HUMAN

MGTQDPGNMGTGVPASEQISCAKEDPQVYCPPEETGGTKDVQVTDCKSPEDSRPPKETDCCNPEDSGQLMV  
SYEGKAMGYQVPPFGWRICLAHEFTEKRKPFQANNVLSNMIKHIGMGLRYLQWYRKTHTVEKTPFIDM  
INSVPLRQIYGCPGGIGGGTITRGWRGQFCRWQLNPGMYQHRTVIADQFTVCLRREGQTVYQQVLSLER  
PSVLRSWNWGLCGYFAFYHALYPRAWTVYQLPGQNVTLTCRQITPILPHDYQDSSLPVGVFVWDVENEED  
EALDVSIMFMRNGLGGDDAPGGLWNEPFLERSGETVRGLLLHHPPTLPNPYTMVAARVTAATTVTHI  
TAFDPDSTGQVWQDLLQDGLDSTPGQSTPTQKGVGIAGAVCVSSKLRPRGQCRLEFSLAWDMPRIMFG  
AKGQVHYRRYTRFFGQDGAAPALSHYALCRYAEWEERISAWQSPVLDLDRSLPAWYKSALFNELYFLADG  
GTVWLEVELEDSLPEELGRNMCHLRPTLRDYGRFGYLEGQYRMYNTYDVHFYASFALIMLWPKLELSLQY  
DMALATLREDLTRRRYLMSGVMAPVKRRNVIPHDIGDPDDEPWLRVNAYLIHDTADWKDLNLKFLVQVYR  
DYYLTGDQNFLKDMWPVCLAVMESEMKFDKDHGLIENGGYADQTYDGVVTTGPSAYCGGLWLAAVVMV  
QMAALCGAQDIQDKFSSILSRGQEAYERLLWNGRYNYDSSSRPQRSVMSDQCAGQWFLKACGLGEGDT  
EVFPTQHVVRLQTIFELNVQAFAGGAMGAVNGMPHGVDPKSSVQSDEWVGVVYGLAATMIQEGLTWE  
GFQTAEGCYRTVWERLGLAFQTPEAYCQQRVFRSLAYMRPLSIWAMQLALQQQHHKASWPVKVQGTGLR  
TGPMFPGKEAMANLSPE

>CWC22\_HUMAN

MKSSVAQIKPSSGHRRENLSYQRNSSPEDRYEEQERSPRDRDYFDYSRSDYEHSSRRGRSYDSSMESRN  
RDREKRREERERTDRKRSRKSPPGRRNPETSVTQSSSAQDEPATKKKKDELPLLTRTGAYIPPAKLR

MMQEQUITDKNSLAYQRMSWEALKKSINGL INKVNISNISI I IQELLQENIVRGRGLLSRSLVLAQASAPI  
 FTHVYAALVAI INSKFPQIGEL ILKRL ILNFRKGYRRNDKQLCLTASKFVAHL INQVAHEVLCLEMLTL  
 LLERPTDDSVEVAIGFLKECGLKLTQVSPRGINAIFERLRNILHESEIDKRVQYMI EVMFAVRKDGFKDH  
 PI ILEGLDLVEEDDQFTHMLPLEDDYNPEDVLNVFKMDPNFMENEKYKAIKKE ILDEGDTSDNTDQDAG  
 SSEDEEEEEEEEGEEDDEEGQKVTIHDKTEINLVSFRRTIYLAIQSSLDFECAHKLKMEFPESQTKELC  
 NMILDCCAQQRTYEKFFGLLAGRFMCLKKEYMESFEGIFKEQYDTIHRLETNKLNRVAKMFAHLLYTDSL  
 PWSVLECIKLESEETTSSSRIFVKIFFQELCEYMGPLKLNARLKDETLQPFEGLLPRDNPRNTRFAINF  
 FTSIGLGLTDELREHLKNTPKVIVAQKPDVEQNKSSPSSSSSASSSSSESDSSSDSSDSSDSSSESSEE  
 SDSSSISSHSSASANDVRKKGHGKTRSKEVDKLRNQQTNDRKQKERRQEHGHQETRTERERRSEKHRDQ  
 NSSGSNWRDPI TKYTSKDVPSERNYSRVANDRQEMHIDL ENKHGDPKKKRGERRNSFSENEKHTHRI  
 KDSENFRRKDRSKSKEMNRKHSGRSDEDRYQNGAERRWEKSSRYSEQSRESKKNQDRRREKSPAKQK

>NCK5L\_HUMAN

MDQPAGGPGNPRPGEADDGSMEPGTCQELLHRLRELEAENSALAQANENQRETYERCLDEVANHVQALL  
 NQKDLREECIKLKKRVFDLERQNQMLSALFQQKLQLTTGSLPQIPLTPLQPPSEPPASPSLSSTEGPAAP  
 LPLGHCAGQREVCWEQQLRPGGPGPPAAPPALDALSPFLRKAQILEVLRAL EETDPLLLCSPATPWRP  
 PGQGPSPPEP INGELCGPPQPEPSPWAPCLLLGPGNLGGLLHWERLLGGLGGEEDTGRPWGSPRGPQAQ  
 GTSSGPNCAPGSSSSSSDEAGDPNEAPSPDTLLGALARRQLNLGQLEDETSYLQAFLAGAAGPLNGDH  
 PGPGQSSSPDQAPPQLSKSKGLPKSAWGGGTPEAHRPGFGATSEGQGPLPFLSMFMGAGDAPLGSRPGHP  
 HSSSQVKSQKLGIPSPGAEQGLLPSARGLKFLKLPPTSEKSPSPGGPQLSPQLPRNSRIPCRNSGSD  
 GSPSPLLARRGLGGGELSPEGAQGLPTSPSPCYTTPDSTQLRPPQSALSTTLSPGPVVSPCYENILDLSR  
 STFRGSPPEPPSPLQVPTYPQLTLEVPQAPEVLRSPGVPPSPCLPESYPYQSPQEKSLDKAGSESPHPG  
 RRTPGNSSKKPSQSGSRRPGDPSTPLRDLAALGKLTGPEGALGSEKNGVPARPGTEKTRGPGKSGES  
 AGDMVPSIHRPLEQLEAKGIRGAVALGTNSLQKQEPGLMGDPGARVYSSSHMGARVDLEPVSPRCLTK  
 VELAKSRLAGALCPQVPRTPAKVPTSAPSLGKPNKSPHSSPTKLPKSPTKVPRPGAPLVTKESPKPKD  
 GKGPWADCGSTTAQSTPLVPGPTDPSQGPEGLAPHS AIEEKVMKGI EENVLR LQGQERAPGAEVKHRNT  
 SSIASWFLKSKL PALNRRTEATKNKEGAGGSPLRREV KMEARKLEAESLNI SKLMAKAEDLRRALEE  
 EKAYLSSRARPRPGPAPGNTGLGQVQGGQLAGMYQGADTFMQQLLN RV DGKELPSKSWREP KPEYGFQ  
 PVSSDPKSPWPACGPRNGLVGPLQCGKPPGKPSSEPGRREETPSEDSLAEPVPTSHFTACGSLTRTLD  
 GIGTFPPPDHGSSGTPSKNLPKTKPRLDPPPVGPPARPPPLTKVPRRAHTLEREVPGIEELLVSGRHS  
 MPAFPALLPAAPGHRGHETCPDDPCEDPGTPPVQLAKNWFNTRAA GSSSDPLMCPPRQLEGLPRTPM  
 ALPVDRKRSQEPSRPSPTPQGGPPGSRTPSTSDMAEEGRVASGGPPLETSESLSDSLYDSLSSCGSQG

>CPNE5\_HUMAN

MEQPEDMASLSEFDSL A GSI PATKVEITVSCRNLLDKDMFSKSDPLCVMYTQGMENKQWREFGRTEVIDN  
 TLNPDFVRKFIVDYFFEEKQNLRFDL YD VDSKSPDLSKHDFLGQAFCTLGEIVGSPGSRLEKPLTIGAFS  
 LNSRTGKMPAVSNGGVPKCKGTIILSAEELSNCRDVATMQFCANKLDKDFFGKSDPFLVFYRSNEDG  
 TFTICHKTEVMKNTLNPVWQTFIPVRALCNGDYDRTIKVEVYDWRDGDGSHDFIG EFTTSYRELARGQSQ  
 FNIEYVVPKMKMKKKKYVNSGTVTLLSFAVESECTFLDYIKGGTQINFTVAIDFTASNGNPSQSTSLHY  
 MSPYQLNAYALALTAVGEI IQHYDSDKMFALGFGAKLPDGRVSHEPFLNGNQENPSCCGIDGILEAYH  
 RSLRTVQLYGPNTFAPVVTHVARNAAVQDGSQYSVLLIITDGVISDMAQTKEAIVNAAKLPMSIIIVGV  
 GQAEFDAMVELDGDDVRISSRGKLAERDIVQFVPPFRDYVDRTGNHVL SMARLARDVLA EIPDQLVSYMKA  
 QGIRPRPPPAATHSPSQSPARTPPASPLHTHI

## &gt;SYTL2\_HUMAN

MIDLSFLTEEEQEAIMKVLQRDAALKRAEEERVRHLPEKIKDDQQLKNMSGQWFYEAkakRHRDKIHGAD  
 IIRASMRKKRPQIAAEQSKDRENGAKESWVNNVNKDAFLPPELAGVVEEPEEDAAPASPSSSVVPASSV  
 IDMSQENTRKPNSPEKRKNPFNSKLEPEGHSSQQTNEQSKNGRTGLFQTSKEDELSESKEKSTVADTS  
 IQKLEKSKQTLPLGSLNGSQAIPKARKMIYKSTDLNKDDNQSFPRQRTDSLKARGAPRGILKRNSSSS  
 STDSETLRYNHNFEPKSKIIVSPGLTIHERISEKEHSLEDNSSPNSLEPLKHFVRFSAVKDELPPQSPGLIHG  
 REVGEFSVLESDRKNGMEDAGDTEEFQSDPKPSQYRKPSLFHQSTSSPYVSKSETHQPMTSGSFPINGL  
 HSHSEVLTARPQSMENSPTINEPKDKSSELTRLESVLPSPADELSHCVEPEPSQVPGGSSRDRQGGSEE  
 EPSPVLKTLERSAARKMPSKSLEDISSDSSNQAKVDNQPEELVRSADVSTVPTQPDNPFSHPKLKRMS  
 KSVPAFLQDESDDRETDTASESSYQLSRHKKSPSSLTNLSSSSGMTSLSSVSGSVMSVYSGDFGNLEVKG  
 NIQFAIEYVESLKELVHVFVAQCKDLAAADVKKQRSDPYVKAYLLPDKGKMGKKKTLVVKKTLNPNVNEIL  
 RYKIEKQILKTQKLNLSIWHRDTFKRNSFLGEVELDLETWWDNKNQKQLRWYPLKRKTAPVALEAENRG  
 EMKLALQYVPEVPVGGKLPPTGEVHIWVKECLDLLRGSLSLNSFVKCTILPDTSRKSRQKTRAVGKTTN  
 PIFNHTMVYDGFREPDLMEACVELTVWDHYKLTNQFLGGLRIGFGTGKSYGTEVDWMDSTSEEVALWEKM  
 VNSPNTWIEATLPLRMLLIAKISK

## &gt;MAGE1\_HUMAN

MSLVSNRRRRRRVAKATAHNSSWGMQAPNAPGLPADVPGSDVPQGPSSDSQILQGLCASEGPSTSVLP  
 TSAEGPSTFVPPPTISEASSASGQPTISEGPGTSLVPTPSEGLSTSGPPTISKGLCTSVTLAASEGRNTSR  
 PPTSSEEPSTSVPTASEVPSTSLPPTPGEGTSTSVPTAYEGPSTSVVPTPDEGPSTSVLPTPGEGPGT  
 SVPLAATEGLSTSVQATPDEGPSTSVPTATEGLSTVPVPTREDEGPSTSVPATPGEGPSTSVLPAASDGG  
 SISLVPTRGKGSSTSVPTATEGLSTSVQPTAGEGSSTSVPTPGGGLSTSVPTATEELSTSVPTPGE  
 GPSTSVLPIPEGGLSTSVPTASDGSSTSVPTPGEGASTLVQPTAPDGPSSVLPNPGEGPSTLFSSSA  
 SVDRNPSKCSLVLPSPRVTKASVSDSEGPKGAEGPIEFVLRDCESPNSISIMGLNTRVAITLKPQDP  
 MEQNVAEELLQFLLVKDQSKYPIRESEMREYIVKEYRNQFPEILRRAAAHLECFRFEFELRELDPEAHTYIL  
 LNKLGVPVPEGLEESPNGPKMGLLMMILGQIFLNGNQAQAEIWEMLWRMGVQRERRLSIFGNPKRLLSV  
 EFVWQRYLDYRPVTDCKPVEYEFWGRSHLETTKMKILKFMKIYKNDPMDWPEKYNEALEEDAARAF  
 EGWQALPHFRPPFFEEAAAEVSPDSEVSSYSSKYAPHSWPESRLESKARKLVQLFLMDSTKLPKPKG  
 ILYYIGRECSKVFPDLLNRAARTLNHVYGTTELVLVLDPRNHSYTLYNRREMEETEEIVDSPNRPGNFLMQ  
 VLSFIFIMGNHARESVAWAFRLGLGVQAGRKHVITCRYLSQRYIDSLRVPDSDPVQYEFVWGRPARLETS  
 KMKALRYVARIHRKEPQDWPQQYREAMEDEANRADVGHRQIFVHNFR

## &gt;K1586\_HUMAN

MGDPGSEIIESVPPAGPEASESTDENEDDIQFVSEGPSRPVLEYIDLVCDDENPSAYYSDILFPKMPK  
 RQGDFLHFLNVKVKVTDTENNEVSKNHCRLSKAKEPHFEYIEQPIIEEKPSLSSKKEIDNLVLPDCWNEK  
 QAFMFTEQYKWEIKEGKLGCKDCSAVRHLGSKAEKHVHVSKEWIAYLVTPNGSNKTTRQASLRKKIREH  
 DVSKAHGKIQLDKESTNDSICNLVHKQNNKNIDATVKVFNTVYSLVKHNRPLSDIEGARELQEKNGEVN  
 CLNTRYSATRIAEHIAKEMKMKIFKNIIEENAKICIIIDEASTVSKKTTLVIIYLQCTIQSAPAVMLFVA  
 LKELVSTIAECIVNTLLTTLNDCGFTNEYLKANLIAFCSDGANTILGRKSGVATKLENFPEI I IWNCLN  
 HRLQLSLDDSISEIKQINHLKIFIDKIYSIYHQPNKNQTKLLGTVAKELETEI I KIGRVMGPRWAACSLQ  
 AATAVWHAYPILYMHFSHSYGLAKRLANINFLQDLALMIDILEEFSVLSTALQSRSTNIKKAQKLIKRT  
 IRALENLKIGTGKYESQIEDLIKSDKFKDIPFNKNNKFNALPRSILLDNI IQHMNLRLLSDRNHEDIFNY  
 FDLLEPSTWPYEEITSPWIAGEKTLFHLCKILKYEVLDLNDREFVNNNIKSNNVSIPTTIYKAKKIVSTI  
 AINSAEAERGFNLMNICTRVRNSLTIDHVSJLMTINLLGKELADWDATPFVKSWSNCHRLATDTRVRQ

KSTKVFHENQLAIWNLK

>TNR6C\_HUMAN

MATGSAQGNFTGHTKKTNNGTNGALVQSPSNQALGAGGANSNGSAARVWGVATGSSSSGLAHCSVSGG  
 DGKMDTMIQDGRSQNCWASNSNAGINLNLNPNANPAAWPVLGHEGTVATGNPSSICSPVSAIQNMGNQ  
 NGNPTGTLGAWGNLLPQESTEPQTSTSQNVSFSAQPQLNLTGPNNTNPMNSSPNINAMQTNGLPNWGM  
 AVGMGAIIPPHLQGLPGANGSSVSQVSGGSAEGISNSVWGLSPGNPATGNSNSGFSQGNQDVTNSALSAK  
 QNGSSSAVQKEGSGGNAWDSGPPAGPGLAWGRSGNGVGNHSGAWGHPSRSTSNVNGEWGKPPNQH  
 SNSDINGKSGTGWESPSVTSQNPTVQPGGHEMNSWAKAASSGTTASEGSSDGSNGHNEGSTGREGTGEGR  
 RRDKGIIDQGHITLPRNDLDPVLSNTGWGQTPVKQNTAWEFEEPRSERKNDNGTEAWGCAATQASNSG  
 GKNDSIMNSTNTSSVSGVWVAPPAAVPANTGWGDSNNKAPSGPGVWGDSSSTAVSTAAAASGHAWSG  
 AANQEDKSPTWGEPPKPKSQHWGDGQRSNPAWSAGGGDWADSSSVLGHLDGDKKNGSGWDADSNRSGSGW  
 NDTRSGNSGWNSTNTKANPGTNWGETLKPQPQNWASKPQDNNVSNWGAASVKQTGTGWIGGPVVK  
 QKDSSEATGWEEPPSIRRKMEIDDGTSAWGDPNSYNNKTVNMWDRNPNV IQSSTTTNTTTTTTTTTSN  
 TTHRVTTPPHQAGTQLNRSPLLGPGRKVSSGWGEMPNVHSTENSWEPESSPSTLVDNGTAAWKKPPSS  
 GSGWGDHPAEPVAFGRAGAPVAASALCKPASKSMQEGWGS GGDEMNLSTSQWEDEEGDVWNAASQEST  
 SSCSSWGNAPKGLQKGMKTSQKQDEAWIMSRLIKQLTDMGFPREPAEEALKSNMNLDAQMSALLEKKV  
 DVDKRGLGVTDHNGMAAKPLGCRPPISKESVDRPTFLDKDGLVEEPTSPFLPSPSLKPLSHSALPS  
 QALGGIASGLGMQNLNRRQIPSGNLGMFGNSGAAQARTMQPPQPPVQPLNSSQPSLRAQVPQFLSPQV  
 QAQLLQFAAKNIGLNPALLTSPINPQHMTMLNQLYQLLAYQLLQIQQMLQAQRNVSGSMRQEQQVAR  
 TITNLQQQIQHQRLAQALLVKQPPPPPPPHLSLHPSAGKSAMDSFSPHPQTPGLPDLQTKEQQSSPN  
 TFAPYPLAGLNPNMNVNSMDMTGGLSVKDPSQSQRLPQWTHPNSMDNLPSAASPLEQNP SKHGAIPGGL  
 SIGPPGKSSIDDSYGRYDLIQNSESPASPPVAVPHSWSRAKSDSDKISNGSSINWPPEFHPGVPWKGLQN  
 IDPENDPDVTPGSVPTGPTINTTIQDVNRYLLKSGGKLSDIKSTWSSGPTSHTQASLSHELWKVPRNSTA  
 PTRPPPGLTNPKPSSTWGASPLGWTSSYSSGSAWSTDTSGRTSSWLVRNLTPQIDGSTLRTLCLQHGPL  
 ITFHLNLTQGNVVRYSKKEAAKAQKSLHMCVLGNTTILAEFAGEEEVNRFLAQGQALPPTSSWQSSSA  
 SSQPRLSAAGSSHGLVRS DAGHWNAPCLGGKGSSELLWGGVVPQYSSSLWGPPSADDSRVIGSPTPLTLL  
 PGDLLSGESL

>ANKH\_HUMAN

MVKFPALHYWPLIRFLVPLGITNIAIDFGEQALNRGIAAVKEDAVEMLASYGLAYSLMKFFTGPMSDFK  
 NVGLVFNKRDRTKAVLCMVVAGAAIAAVFHTLIAYS DLGYYIINKLHHVDES VSKTRRAFLYLAAPPF  
 MDAMAWTHAGILLKHKYSFLVGCASISDVIAQVVFVAILLHSHLECREPLLIPILSLYMGALVRCTTLCL  
 GYYKNIHDIIPDRSGPELGGDATIRKMLSFWWPLALILATQRISRPVNLVFSRDLGGSSAATEAVAILT  
 ATYPVGHMPYGLTEIRAVYPAFDKNNPSNKLVSTNTVTAAHIKKFTFVCMALSLTLCFVMFWTPNVSE  
 KILIDIIGVDFAFaelCVVPLRIFSFPPVPTVRAHLTGWMLTKKTFVLAPSSVLRIIVLIA SLVLPY  
 LGVHGATLVGSSLAGFVGESTMVAIAACYVYRKQKKMENESATEGEDSAMTDMPPTEEVTDIVEMREE  
 NE

>ZSWM6\_HUMAN

MAERGOQPPAKRLCCRPGGGGGGGSSGGGGGAGGGYSSACRPGPRAGGAAAAACGGGAALGLLPPGK  
 TQSPESLLDIAARRVAEKWPFQRVEERFERIPEPVQRRIVYWSFPRSEREICMYSSFNTGGGAAGGPGDD  
 SGGGGGAGGGGGSSSSPAATSAAATSAAAAAAAAAAAAAAAAAGAGAPSVGAAGAADGGDETRLPFRRG  
 IALLES GCVDNVLQVGFHLSGVTPEPAIQSEPETVCNVAISFDRCKITSVTCSCGNKDIIFYCAHVVALSL

YRIRKPDQVKLHLP ISETLFQMNRDQLQKFVQYLITVHHTEVLP TAQKLADEILSQNSEINQVHGAPDPT  
 AGASIDDENCWHLDEEQVQEQVKLFLSQGGYHGSQKLNLLFAKVREMLKMRDSNGARMLTLITEQFMAD  
 PRLSLWRQQGTAMTDKYRQLWDEL GALWMCIVLNPCKLEQKASWLKQLKKWNSVDVCPWEDGNHGSLEP  
 NLTNALPQGANANQDSSNRPHRTVFTRAIEACDLHWQDShLQHISSDLYTNYCYHDDTENS LFD SRGW  
 LWHEHVPTACARVDALRSHGYPREALRLAIAIVNTLRRQQKQLEMFR TQKKELPHKNITSITNLEGWG  
 HPLDPVGT L FSSLM EACRIDDENLSGFSDFTENMGQCKSLEYQHLPAHKFLEEGESYLT LAVEVAL IGLG  
 QQRIMP DGLY TQEKVCRNEEQ LISKLQE IELDDTLVKIFRKQAVFLLEAGPYSGLGEI IHRESVPMHTFA  
 KYLFTSLLPHDAELAYKIALRAMRLLVLESTAPSGDLTRPHHIASVVPNRYPRWFTLSHIESQQCELAST  
 MLTAAKGDVRRLETVLESIQKNIHSSSHIFKLAQDAFKIATLMDSLPDITLLKVSLELGLQVMRMTLSTL  
 NRRRREMVRWLVT CATEVGVYALDSIMQ TWFTLFTPT EATSIVATTVMNSSTIVRLHLDCHQQEKLASSA  
 RTLALQCAMKDPQNCALSALTCEKDHI AFETAYQIVLDAATTGMSYTLFTIARYMEHRGYPMRAYKLA  
 TLAMTHLNL SYNQDTHPAINDVLWACALSHSLGKNELAAI IPLVVKSVKATVLSDILRRCTLTTPGMVG  
 LHGRRNSGKMSLDKAPLRQLLDATIGAYINTHSRLTHISPRHYSEFIEFLSKARETFLMAHDGHIQFT  
 QFIDNLKQIYKGGKKLMLVREFRG

>VAT1L\_HUMAN

MAKEGVEKAEETE QMIEKEAGKEPAEGGGD GSHRLGDAQEMRAVVL AGFGGLNKLRLFRKAMPEPQDGE  
 LKIRVKACGLNFIDL MVRQGNIDNPKTPLVPGFECSGIVEALGDSVKGYEIGDRVMAFVYNNAWAEVVC  
 TPVEFVYKIPDDMSFSEAAA FPMNFVTAYVMLFEVANLREGMSVLVHSAGGGVQAVAQLCSTVPNVTVF  
 GTASTFKHEAIKDSVTHLFD RNADYVQEVKRI SAEGVDIVLDCLCGDNTGKGLSLLKPLGTYYILYSSNM  
 VTGETKSF SFAKSWVQEVKNPIKLYEENKVIAGFSLLNLLFKQGRAGLIRGVVEKLI GLYNQKKIKPV  
 VDSLWALEEVKEAMQR IHDRGNIGKLI LDVEKTP TPLMANDSTETSEAGEEEEDEHGDSENKERMPFIQ

>ZDBF2\_HUMAN

MQKRQGYCSYCRVQYNNLEQHLFSAQHRSLTRQSRRQICTSSLMERFLQDVLQHHPYHCQESSSTQDETH  
 VNTGSSSEVHLDDAFSEEEEEDEDKVEDEDATEERPSEVSEPIEELHSRPHKSQEGTQEVSVRPSVIQK  
 LEKGGQQPLEFVHKIGASVRKCNLVDIGQATNRSNLVRPPVICNAPASCLPESSNDRPV TANTTSLPPA  
 AHLDSVSKCDPNKVEKYLEQPDGASRNVPVSSHVETTSFSYQKHKESNRKSLRMNSDKLVLWKDVKSQGGK  
 TLSAGLKFHERMGTKGSLRVKSPSKLAVNPNTDMPSNKGIFEDTIAKNHEEFFSNMDC TQEEKHLVFNK  
 TAFWEQKCSVSSEMFKDCISLQSASDQPQETAQDLSLWKEEQIDQEDNYESRGSEMSFDCSSSFHSLTDQ  
 SKVSAKEVNL SKEVRTDVQYKNNKSYVSKISSDCDDILHLVTNQSQMIVKEISLQNHARHISLVDQSYESS  
 SSETNFD CDASPQSTSDYPQQSVTEVNL PKEVHIGLVDKNYSSSSEVSADSVFPLQSVVDRPPVAVTET  
 KLRRKAHTSLVDNYGSSCSETSFD CDVSLVESVVDHPQLTVKGRNLKGRQVHLKHKKRKPSAKAHLDCDV  
 SLGTVADESQR AVEKINLLKEKNADLMDMNCESHGPEMGFQADAQLADQSQVAEIERQKVDVDLENKSVQ  
 SSRSSLSSDSPASLYHSAHDEPQEALDEVNLKELNIDMEVRSYDCSSSELTFDSDPPLLSVTEQSHLDAE  
 GKERHIDLEDESCESDSEITFDSDIPLYSVIDQPEVAVYEEETVDLESKSNESC VSEITFDSDIPLHSG  
 NDHPEVAVKEVIQKEEYIHLERKNDEPSGSEISSDSHAPLHSVTNSPEVAVKLNPKQEEQVHLENKENE  
 PIDSEVSLDYNII FHSVTGRSEDPIKEISLHTKEHMYLENKSVFETSLDSDVPLQAATHKPEVIVKETWL  
 QREKHA EFQGRSTEFSGSKTSLDSGVPHYSVTEPQVAVNKINRKKQYVLENKNDKCSGSEIILDSNVPPQ  
 SMTDQPQLAFLKEKHVNLKDKNSKSGDSKITFDSEQLQEAVKIDQWKEEVI GLKNKINEPSTYKLIHHP  
 DVSVQSVADQPKVAIKHVNLGNENHMYLEVKNQSYSCSEMNLDSGFLGQSVNRPQITILEQEHIELEGK  
 HNQCCGSEVSFDSDDPLQSVADRLRET VKEISLWKDEEVDTE DRRNEAKGFEIMYDSVDLQPVAGQPEEV  
 VKEVSLWKEHVLENKIVKPTDSRINFDSHEPLQSVTNKIPGANKEINLLREEHVCLDDKGYVPSDSEII  
 YVSNIPLQSVIKQPHILEEEHASLEDKSSNSYSPESSSDSND SFQAAADELQKPVKEINLWKEDHIYLED



KSYKLGDFDVSASHIPVQFVTDQSSVPVKEINLQKKDHDNDLENKNCEVCGSEIKCHSCVHLQSEVDQPQ  
 VSYKEADLQKEEHVMEKTDQPSDSEMMYDSVPPFQIVVNQFPGSVKETHLPKVVLDLVPGSDSYEVI  
 SDDIPLQLVTDPPQLTVKDISCINTECIDIEDKSCDFGSEVRCNKASTPSMTNQCKETFKIINRKKDY  
 IILGEPSCQSCGSEMFNVDASDQSMYESQGPDEKMKYIDSEDKSCGYNGSKGKFNLEDTSHRTHRL  
 QKAHKEASLRKDPNAGLKGKSCQSSASAVDFGASSKSALHRRADKKRSLKHRDLEVSCEPDGFEMNF  
 QCAPPLPSDTPQETVKKRHPCKKVSSDLKEKNHDSQSSSVLKVDSVRNLKAKDVIEDNPDEPVLEAL  
 PHVPPSFVGTWSQIMREDDIKINALVKEFREGRFHCYFDDDCETKKVSSKGGKVTWADLQGGEDTAPT  
 QAVSESDDIVCGISDIDDLVALDKPCHRHPAERPPKQKGRVASQCQTAKISHSTQTSCKNYPVMKRKI  
 IRQEEDPPKSKCSRLQDDRKTKKVKIGTVEFPASCTKVLKPMQPKALVCVLSLNIKLKEGGLPFPKM  
 RHHSWDNDIRFICKYKRNIIFYEPLIKQIVISPLSVIVPEFERRNWKIHFNRSNQNSSAGDNDADGQ  
 GSASAPLMAVPARYGFNSHQGTSDSSLFLEESKVLHARELPKKNRFLQTLFNLHDVVKISPKSVRNKLES  
 QSKKKIHGKRVTSSNKLGFPPKVKYKPIILQQKPRKASEKQSIWIRTKPSDIIRKYISKYSVFLRHRYQS  
 RSAFLGRYLKKKKSVSRLKAKRTAKVLLNSSVPPAGAEELSSAMANPPPKRPRVASCRAVARRRKTDE  
 SYHGRQKGPSTPVRAYDLRSSSCLQQRERMMTRLANKLRGNEVK

>ROB02\_HUMAN

MSLLMFTQLLLCGFLYVRVDGSRLRQEDFPPRIVEHPSDVIVSKGEPTLNCKAEGRPPTIEWYKDG  
 VETDKDDPRSHRMLLPSGSLFFLRIVHGRRSKPDEGSYVCVARNYLGEAVSRNASLEVALLRDDFRQNT  
 DVVVAAGEPAILECQPPRGHPEPTIYWKDKVRIIDKEERISIRGGKLMISNTRKSDAGMYTCVGTNMG  
 ERDSDPAELTVFERPTFLRRPINQVLEEEAVEFRQCQVQGDQPQTVRKKDDADLPRGRYDIKDDYTLRI  
 KKTMTSTDEGTMYCIAENRVGMEASATLTVRAPPQFVVRPRDQIVAQGRVTVPFCETKGNPQPAVFWQKE  
 GSQNLFPNQPPQNSRCSVSPTGDLTITNIQRSDAGYICQALTVAGSILAKAQLVTDVLTDRPPPII  
 LQGPANQTLAVDGTALLKCKATGDPLPVISWLKEGFTFPGRDPRATIQEQGLQIKNLRISDTGTYTCA  
 TSSSGETSWSAVLDVTEGATISKNYDLSLPGPPSKPQVTDVTKNSVTLVSWQPGTGLPASAYIEAF  
 SQSVNSWQTVANHVKTTLTYTVRGLRPNTIYLFMVRAINPQGLSDPSPMSDPVVRTQDISPPAQGVDRQV  
 QKELGDVLRHLNPPVLTPTTVQVTWTVDROPQFIQGYRVMYRQTSGLQATSSWQNLDAKVPTERSAVLV  
 NLKKGVTYEIKVRPYFNEFQGMDESEKTVRTEEAPSAPPQSVTVLTVGSYNSTISVSWDPPPPDHQNG  
 IQEYKIWCLGNETRFHINKTVDAAIRSVIIGGLFPGIYRVEVAASTSAGVGKSEPQPIIIGRRNEVV  
 ITENNSITEQITDVVKQPAFIAGIGGACWVILMGFSIWLWRRKKRGLSNYAVTFQRGDGGLMSNGSR  
 PGLLNAGDPSYPWLADSWPATSLPVNNSNSGPNIEGNFGRGDVLPVPPGQGDKTATMLSDGAIYSSIDFT  
 TKTSYNSSSQITQATPYATTQILHSNSIHELAVDLPDPQWKSIIQKTDLMFGYSLPDQNKGNNGKGG  
 KKKKNKNSKPKQKNGSTWANVPLPPPPVQPLPGTELEHYAVEQQENGYDSDSWCPPLPVQTYLHQLED  
 ELEEDDDRVPTPPVRGVASSPAISFGQQTATLTPSPREEMQMLQAHLDLDELTRAYQFDIAKQTWHIQSN  
 NQPPQPPVPLGYVSGALISDLETDVADDADDEEEALEIPRPLRALDQTPGSSMDNLDSSVTGKAFSTSS  
 QRPRPTSPFSTDSNTSAALSQSQRPRPTKHKGGKMDQQPALPHRREGMTDEEALVPYSKSPSPGGHS  
 SSGTASSKGSTGRKTEVLRAGHQARNASDLLDIGYMGNSQGGFTGEL

>AG04\_HUMAN

MEALGPGPPASLFQPPRRPGLGTGKPIRLLANHFQVQIPKIDVYHYDVKIKPEKRPRRVNREVDTMVR  
 HFQMIFGDRQPGYDGKRNMYTAHPLPIGRDRVDMVETLPGEGKDQTFKVSQVSVVSLQLLLEALAGH  
 LNEVPDDSVQALDVIIRHLPSMRYTPVGRSFFSPPEGYYHPLGGGREVWFGFHQSVRPAMWNMMLNIDVS  
 ATAFYRAQPIIEFMCEVLDIQNIQNEQTKPLTDSQRVKFTKEIRGLKVEVTHCGQMKRKYRVCNVTRRPAS  
 HQTFPLQLENGQAMECTVAQYFKQKYSLQLKYPHLPCLQVGGQEQQHTYLPLEVCNIVAGQRCIKKLDNQ  
 TSTMIKATARSAPDRQEEISRLVKSNSMVGPPDPYLKEFGIVVHNEMTELTRVLPAPMLQYGGRNKTV

TPNQGVWDMRGKQFYAGIEIKVWAVACFAPQKQCREDLLKSFTDQLRKISKDAGMPIQGQPCFCKYAQGA  
 DSVPEPMFKHLKMTYVGLQLIVVILPGKTPVYAEVKRVGDTLLGMATQCVQVKNVVKTSPTLSNLCLKIN  
 AKLGGINNVLVPHQRPVSFQPVIFLGADVTHPPAGDGKKPSIAAVVGSMDGHPSTRYCATVVRVQTSRQEI  
 SQELLYSQEVIQDLTNMVRRELLIQFYKSTRFKPTRIYYRGGVSEGMKQVAWPELIAIRKACISLEEDY  
 RPGITYIVVQKRHHTRLFCADKTERVKGSGNVPAGTTVDSTITHPSEFDYLCSHAGIQGTSRPSHYQVL  
 WDDNCFTADELQLLTYQLCHTYVRCTRSVSIAPAPYYARLVAFRARYHLVDKDHDSAEGSHVSGQSNGRD  
 PQALAKAVQIHHTDQHTMYFA

>CHD8\_HUMAN

MADPIMDLFDDPNLFGDLSLTDDSFNQVTQDPIEEALGLPSSLDQLDQMNQDGGGGDVGNSSASELVPPP  
 EETAPTELSKESTAPAPESITLHDTYTTQPASQEQPAQVLTSTPTSGLLQVSKSQEILSQGNPFMGVSA  
 TAVSSSSAGGQPPQSAPKIVILKAPPSSSVTGAHVAQIQAQGITSTAQPLVAGTANGGKVTFTKVLGTGP  
 LRPVSVIVSGNTVLAAKVPGNAAVQRIVQPSRPVKQLVLQPVKGSAPAGNPGATGPPLKPAVTLTSTPT  
 QGESKRITLVLQQPQSGGPGQHRHVVLGSLPGKIVLQGNQLAALTAQAKNAQQPAKVVTIQLQVQQPQQK  
 IQIVPQPPSSQPQPPSTQPVTLSSVQQAQIMGPGQSPGQRLSVPVKVVLQPAQSSQGASSGLSVVK  
 VLSASEVAALSSPASSAPHSGGKTGMEENRRLEHQKQKQEKANRIVAEA IARARARGEQNIPRVLNEDEL  
 SVRPEEEGEEKRRRKSAGERLKEEKPKKSKTSGASKTKGKSKLNTITPVVGGKRRRNTSSDSDVEVMPA  
 QSPREDEESSIQKRRSNRQVKKRKYTEDLDIKITDDEEEVEVDVTGPIKPEPILPEPVQEPDGETLPSMQ  
 FFVENPSEEDAAIVDKVLSMRIVKKELPSGQYTEAEFFVKYKNYSYLHCEWATISQLEKDKRIHQKLR  
 FKTKMAQMRHFFHEDEEFPNDYVEVDRIIDESHSIDKDNQEPVIYYLVKWCSLPYEDSTWELKEDVDEG  
 KIREFKRIQSRHPELKRVRNPQASAWKLELSHEYKRNQLREYQLEGVNWLLFNWYNRQNCILADEMGL  
 GKTIQSIAFLQEVYVNGIHGPFVIAPLSTITNWEREFNTWEMNTIVYHGLASRQMIQQYEMYCKDSR  
 GRLIPGAYKFDALITTFEMILSDCEPRLREIEWRVCIIDEAHLRKNRNCKLLDSLKHMDLEHKVLLTGTP  
 QNTVEELFSLHLFLEPSQFPSESEFLKDFGDLKTEEQVQKLQAILKPMMLRRLKEDVEKNLAPKQETIE  
 VELTNIQKKYRAILEKNFSFLSKGAGHTNMPNLLNTMMELRKCCHPYLINGAEKILTEFREACHIP  
 HDFHLQAMVRSAGKVLIDKLLPKLKAGGHKVLIFSQMVRCLEIDYLIQRRYLYERIDGRVRGNLRQA  
 AIDRFKSKPDSRDFVLLCTRAGGLGINLTAADTCIFDSDWNPQNDLQAQARCHRIGQSKAVKVYRLITR  
 NSYEREMFDKASLKLGLDKAVLQSMGRDGNITGIQQFSKKEIEDLLRKGAYAAIMEEDDEGSKFCEEDI  
 DQILLRRTTITIESEKGGSTFAKASFVASENRTDISLDDPNFWQWAKKADLMDLLNSKNNLVIDTPR  
 VRKQTRHFSTLKDDDLVEFSDLESEDDERPRRHRHAYGRTDCFRVEKHLLVYGWGRWRDILSHGRF  
 KRRMTERDVETICRAILVYCLLHYRGDENIKGFIWDLISPAENGKTKELQNHSGLSIPVPRGRKGGKVK  
 QSTFDIHKADWIRKYNPDTLQDESQYKHLKHQCNKVLRLVRMLYLRQEVIGDQAEKVLGGAIASEIDI  
 WFPVVDQLEVPPTWWDSEADKSLIGVFKHGYEKYNTMRADPALCFLEKAGRPPDKAIAAEHRVLDNFSD  
 IVEGVDFDKCEDPEYKPLQPPKQDDEGDPLMMDEEISVIDGDEAQTQQPGHLFWPPGSALTARLR  
 RLVTAYQRSYKREQMKIEAAERDRRRRRCEAAFKLKEIARREKQQRWRREQTDFYRVVSTFGVEYDPD  
 TMQFHWDRFRTFARLDKKTDESLETKYFHGFVAMCRQVCRLPPAAGDEPPDPNLFIEPITEERASRTLYRI  
 ELLRRLREQVLCHPLEDRALCQPPGPELKWWEVVRHDGELLRGAARHGVSQTDNCNMQDPDFSLAA  
 RMNYMQNHQAGAPAPSLSRCSTPLLHQYTSRTASPLPLRPDAPVEKSPEETATQVPSLESLETLKLEHEV  
 VARSRPTQDYEMRVSPSDDTTLVSRVPPVKLEDEDDSDSELDSLKSPSSSSSSSSSSSSSTDESED  
 EKEEKLTDQSRSKLYDEESLSTMSQDGFNEDGEQMTPELLLQERQRASEWPKDRVLINRIDLVCQA  
 VLSGKWSSRRSQEMVTGILGPGNHLLDPSLTPGEYGDSPVPTPRSSAASMAEEEASAVSTAAAQFT  
 KLRRGMDEKEFTVQIKDEEGLKLTQKHKLMANGVMGDGHLFHKKKGNRKKLVELEVECMEEP NHLDVD  
 LETRIPVINKVDGTLVGEDAPRRAELEMWLQGHPEFAVDPRFLAYMEDRRKQKWQRCKKNNKAELNCLG  
 MEPVQTANSRNGKGGHHTETVFNRLVPGPIAPESSKKRARRMRPDL SKMMALMQGGSTGSLSHNTFQHS

SSGLQSVSSLGHSSATSASLPFMPFVMGGAPSSPHVDSSTMLHHHHHPHPPHHHHHPGLRAPGYPSSP  
 VTTASGTTLRLPPLQPEEDDDEDEEDDDLSQGYDSSERDFSLIDDPMPANSDSSEDADD

>PCD18\_HUMAN

MHQMNAMHFRFV FALLIVSFNHDVLGKNLYRIYEEQRVGSVIARLSEADVLLKLPNPSTVRFRAMQ  
 RGNPPLL VVNE DNGEISIGATIDREQLCQKNLNCSEIFDVI TLPTEHLQLFHIEVEVLDINDNSPQFSRS  
 LPIEISESAAVGT R I P L D S A F D P D V G E N S L H T Y S L S A N D F F N I E V R T R T D G A K Y A E L I V V R E L D R E L K S  
 SYELQLTASDMGVPQRSGSSILKISISDSNDNSPAFEQQSYIIQLLENSPVGTL LLDLNATDPDEGANGK  
 IVYFSSHVSPKIMETFKIDSERGHLTLFKQVDYEITKSYEIDVQAQDLGPNSIPAHCKII IKVVDVNDN  
 KPEININLMSPGKEEISYIFEGDPIDTFVALVRVQDKD SGLNGEIVCKLHGHHGFKLQKTYENNYLILTN  
 ATL DREKRSEYSLTVIAEDRGTPSLSTVKHFTVQINDINDNPPHFQRSRYEFVISENNSPGAYITTVTAT  
 DPDLGENGQVYTTILESFILGSSITTYVTIDPSNGAIYALRIFDHEEVSQITFVVEARDGGSPKQLVSNT  
 TVVLTIIDENDNVPVVI G PALRNNTAEITIPKGAESGFHVTRIRAI DRDSGVNAELSCAIVAGNEENIFI  
 IDPRSCDIHTNVSMDSVPYTEWELSVIIQDKGNPQLHTKVLLKCMIFEYAESVTSTAMTSVQSASLDVSM  
 IIIISLGAICAVLLVIMVLFATRCNREKKDTRSYNCRVAESTYQHHPKRPSRQIHKGDITLVPTINGTLP  
 IRSHHRSSPSSPTLERGMGSRQSHNSHQSLNSLVTISSNHVPENFSLELTHATPAVEQVSQLLSMLHQ  
 GQYQPRPSFRGNKYSRYRYALQDMDKFSLKDSGRGDSEAGDSYDLGRDSPIDRLLGEGFSDLFLTDGR  
 IPAAAMLCTEECRVLGHSDQCWMPPLPSPSSDYRSNMFIPGEEFPTQPQQQHPHQSLLEDDAQPADSGEKK  
 KSFSTFGKDSPNEDTGDSTSSLLSEMSSVFQRLPPSLDTYSECSEVDRSNSLERRKGPLPAKTVGYP  
 QGVAAWAASTHFQNPNTNCGPPLGTHSSVQPSKWL PAMEEIPENYEEDDFDNVNLHLDNGKHELM DASE  
 LVAEINKLLQDVRQS

>GPAT1\_HUMAN

MDESALTLGTIDVSYLPHSSEYSVGRCKHTSEEWGECGRPTIFRSATLKWKESLMSRKRPFVGRCCYSC  
 TPQSWDKFFNPSIPSLGLRNVIYINETHRHRGWLARRLSYVLFIQERDVHKGMFATNVTENVLNSSRVQ  
 EAIAEVAEALNPDGSAQQQSKAVNKVKKAKRILQEMVATVSPAMIRLTGWVLLKLFNSFFWNIQIHKGQ  
 LEMVKAATETNPLFLPVHRSHIDYLLLTFLFCHNIKAPYIASGNLNIPIFSTLIHKLGGFFIRRRLL  
 DETPDGRKDVLYRALLHGHI VELLRQQQFLEIFLEGTRSRSGKTSCARAGLLSVVVDLSTNVIPDILII  
 PVGISYDRIIEGHYNGEQLGPKPKNESLWSVARGVIRMLRKNYGCVRVDFAPFSLKEYLESQSQKPVSA  
 LLSLEQALLPAILPSRPSDADEGRDTSINESRNATDESRRRLIANLAEHILFTASKSCAIMSTHIVAC  
 LLLYRHRQGIDLSTLVEDFFVMKEEVLARDFDLGFGNSEDDVMHAIQLLGNCVTITHTSRNDEFFITPS  
 TTVPVVFELNFYSNGVLHVFIMEAIIACSLYAVLNKRGLGGPTSTPPNLISQEQLVKKAASLCYLLSNEG  
 TISLPCQTFYQVCHETVGKFIQYIGILTVAEHDDQEDISPSLAEQQWDKKLEPLSWRSDEEDEDSDFGEE  
 QRDCYLKVSQSKEHQFIFTLQRLGPLEAYSSAAIFVHNFSGPVPEPEYLQKLHKYLITRTERNVAVY  
 AESATYCLVKNV KMFKDIGVFKETKQKRVSVLELSSTFLPQCNRQKLEYLEILSFVVL

>CLO35\_HUMAN

MNWNPKSATL PPLYPKSQPPFLHQSLINQITTTSSQSSFSYPGSNQEACMPGNSNPISQPLLNIQNYP  
 QQISVSDMHNGTVVASHTSVERITYANVNGPKQLTHNLQMSSGVTQNVWLNSPMRNPVHSHIGATVSHQT  
 DFGANVPNMPALQSQLITSDTYSMQMIPSNSTRLPVAYQGNQGLNQSFSEQQVDWTQQCISKGLTYPD  
 YRPPPKLYRYPQSFLPDSTIQKQNFIPHTSLQVKNSQLLNSVLTLP SRQTS AVPSQQYATQTDKRPPPP  
 PYNCRYGSQPLQSTQHITKHLMEVPQSREMLSSEIRTSFQQWQNPENNVSTIGNFTNLKVNTNSKQPF  
 NSPIRSSVDGVQTLAQNEEKIMDSCNPTS NQVLDTSVAKEKLV RDIKTLVEIKQKFS ELARKIKINKDL  
 LMAAGCIKMTNTSYSEPAQNSKLSLKQTAKIQSGPQITPVPENAERQTPTVVEAETNKTQCMLNSDIQ

EVNCRRFNQVDSVLPNPVYSEKRPMPDSSHDVKVLTSTKSAVEMTQAVLNTQLSSENVTKVEQNSPA  
 VCE TISVPKSMSTEEYKSKIQENMLLLALLSQARKTQKTVLKDANQTIQDSKPDSCEMNPNTQMTGNQLNLK  
 NMETPSTSNVSGRVLDNSFCSGQESSTKMPAKSDSSCSMEVLATCLSLWKKQPSDTAKEKECDKLRNT  
 TAVGISKPANIHVKSPCSVVGNSNSQNKISNPSQQTALSMVMHNYESSGINITKGTQLQI  
 AVVSPLVLSE VKTLSVKGITPAVLPETVYPVKEGVSCLQNLQLAENAKATAALKVDVSGP  
 VASTATSTKIFPLTQKEKQ NESTNGNSEVTPNVNQGKHNKLESAIHSPMNDQQISQESR  
 NSTVVSDDLQIDNICSLVEGDTSYNSQIA KIFSSLPLKMVEPQKPSLPNQQIGSREPEK  
 QLDNTTENKDFGFQKDKPVQCTDVSHKICDQSKSEPPLE SSFNLETNRVILEKSSLEHATEK  
 STANDTCSSAAIQEDIYPQEIDASSNYTPQDPARNEIHSKAPVLY LHDQSELLKEFPY  
 GIEAVNTREGSVGQQTYYQTSSEDTADKTSSDSKDPADQIQITILSSEQMKEIFPE  
 QDDQPYVVDKLAEPQKEEPITEVVSQCDLQAPAAGQSRDSVILDSEKDDIHCCALG  
 WLSMVYEGVPQCQC NSIKNSSSEEEKQKEQCSPLDNTNSCKQGERTSDRDVTVVQF  
 KSLVNNPKTPPDGKSHFPELQDDSRKDTP KTKHKSLPRTEQELVAGQFSSKCDKLN  
 PLQNHKRKLRHFVTFHSSNKMTASYEQASQETRQKKHVTQN SRPLKTKTAFLPNKDV  
 YKKHSSLGQSLSPEKIKLKLKSVFKQKRKLDQGNVLDMEVKKKKHKDQEQKGS  
 VGATFKLGDLSNPNERAIVKEKMVSNTKSVDTKASSSKFSRILTPKEYLQRQKHKEALS  
 NKASKKICVK NVPDSEHMRPSKLAVQVESCGKSNEKHSSGVQTSKESLNGLTSHGK  
 NLKIHHSQESKTYNILRNVKEKV GKGQPKIWI  
 DKTKLTKLKNISNEAQFSQMPQVQDKKLYLNRVGFKTERESISLTKLESSPRKLHKD  
 KRQENKHKTFLPVKGTEKSNMLEFKLCPDILLKNTNSVEERKDVKPHRKEQAPLQVSG  
 IKSTKEDWLK FVATKKRTQKDSQERDNNVNSRLSKRSFSADGFEMLQNPVKDSKEMFQ  
 TYKQMYLEKRSRSLGSSPVK

>PLXA4\_HUMAN

MKAMPWNWTCLLSHLLMVGMSSTLLTRQPAPLSQKQRSFVTRGEPAEAGFNHLVVDERTGHIY  
 LGAVNR IYKLSDDLKVLVTHETGPDENDPKCYPPIVQTCNEPLTTNNVNMMLLIDYKENR  
 LIACGSLYQGIKLLRLEDLFLKGEPIYHKKHEHLSGVNESGSVFGVIVSYNLDDKLFIA  
 TAVDVGKPEYFPTISSRKLTKNSEADGMFAYVFHDEFVASMIIKIPSDFTIIPDFDIY  
 VYVGFSSGNFVYFLTLQPEMVSPPGSTTKEQVYTSKLVRLCKEDTAFNSYVEVPIG  
 CERSGVEYRLLQAAYLSKAGAVLGRITLGVHPDDLLFTVFSKGQKRKMKS  
 LDESALCIFILKQINDRIKERLQSCYRGEGLDLAWLKVKDIPCSALLTIDDFCGLDM  
 NAPLGVSDMVRGIPVFTEDRDRMTSVIAYVYKNHSLAFVGTSGKLLKIRVDGPRGNAL  
 QYETVQVVDGPGVLRDMAFSKDEHEQLYIMSERQLTRVPVESCQYQSCGCELGSDPHG  
 WCVLHNTCTRKERCERSKEPRRFASEMKGQCVRLTVHPNNISVSQYNVLLVLETYN  
 VPELSAGVNCTFEDLSEMDGLVVGNIQCYSPA  
 AKEVPRIITENGDH HVVQLQLKSKETGMTFASTSFVFNCSVHNSCLSCVESP  
 YRCHWCKYRHVCTHDPKTCFSQEGRVKLPEDCPQLLRVDKILVPVEV  
 IKPITLKAKNLPQPQSGRGYECILNIQGEQRPALRFNSSSVQCNTSYSYEGME  
 INNLPVELTVVWNGHFNIDNPAQNKVHLYKCGAMRESCGLCLKADPDFACGWCQ  
 GPGQCTLRQHCPAQESQWLELSGAKSKCTNPRITEIIPVTGPREGGTVTIRGENL  
 GLEFRDIASHVKVAGVECSPLVDGYIPAEQIVCEMGEAKPSQHAGFVEICVAV  
 CRPEFMARSSQLYYFMTLTLSDLKPSRGPMSGGTQVTITGTNLNAGSNVVMF  
 GKQPCLFHRRSPSYIVCNTTSSDEVLEMKVSQVDRAKIHQDLVFQYVEDPTIVRIE  
 PEWSIVSGNTPIAVWGTHLDLIQNPQIRAKHGGKEHINICEVLNATEMTCQAPALAL  
 GPDHQSDLTERPEEFGFILDNVQSLLILNKTNFTYYPNPVFEAFGPSGILELKP  
 GTPILKGNLIPPVAGGNVKNLNTVVLVGEKPC TVTVSDVQLLCEPNLIGRHKV  
 MARVGGMEYSPGMVYIAPDSPLSLPAIVSIAVAGLLIIFIVAVLIA  
 YKRKSRESDLTLKRLQMMDNLESRVALECKEAFELQTDIHELTSDLGAGIPFLD  
 YRTYTMRVLPFGIE DHPVLRDLEVPYRQERVEKGLKFAQLINNKFLLSFIR  
 TLESQRSFSMRDRGNVSLIMTVLQSKLEYATDVLKQLLADLIDKNLESKNHP  
 KLLRRTESVAEKMLTNWFTLLYKFLKECAGEPLFSLFCAIKQMEKGPIDAIT  
 GEARYSLSEDKLIRQQIDYKTLVLSVSPDNANSPEVPVKILNCDTITQVKEK  
 ILDAIFKNVPCSHRPAADMLEWRQGSARMILQDEDITTKIENDWKRLN  
 TLAHYQVPDGSVVALVSKQVTAYNAVNNSTVSRTSASKYENMIRYTGSPDSL  
 RSRTPMITPDLESVKMWHLVKNHEHGDQKEGDRGSKMVSEIYLTR

LLATKGTLQKFVDDL FETIFSTAHRGSALPLAIKYMFDLDEQADKHGIHDPHVRHTWKSNCPLPRFWVN  
MIKNPQFVFDIHKNSITDACLSVAQTFMDSCTSEHRLGKDSPSNKLLYAKDIPSYKNWVERYSDIGK  
MPAISDQDMNAYLAEQSRMHMNEFNTMSALSEIFSYVGKYSEEILGPLDHHDDQCGKQKLAYKLEQVITLM  
SLDS

>K1549\_HUMAN

MELVLKSTGHSAQVALTETAPGSQHSSPLHVTAPPSATTFDTAFFNQKQTKSTADPSIFVATYVSVT  
SKEVAVNDDMDNFLPDTHWTPRMVSPIQYITVSPGPLPREALEPMLTPSLPMVSLQDEEVTSGWQNTT  
RQPAAYAESASHFHTFRSAFRTSEGIPTPGRNLVLYPTDAYSHLSSRTLPEIVASLTEGVETTLFLSSR  
SLMPQPLGDGITIPLPSLGEVSQPPEEWATSADRYTDVTTVLSQSLEETISPRTYPTVTASHAALAFSR  
THSPLLSTPLAFASSASPTDVSSNPFLPSDSSKSELHSNSALPGVDNTHILSPVSSFRPYTWCAACTV  
PSPQQVLATSLMEKDVSGDGAETLCMTVLEESSISLMSSVVAADFSEFEEDPQVFNTLFAFRPIVPLSSR  
SMEISETSVGISAEVDMSSVTTTQVPPAHGRSLVPASLDPTAGLSVAETQVTPSSVTTAFFSVITSILL  
DSSFSVIANKNTPSLAVRDPVSFTPYSLVPSVLESSLFSQDERSSEHFKPRGALDFASSFFSTPPELSSG  
SISSEAPASLSLMPSDLSPFTSQSFSPLVETFTLFDSSDLQSSQLSLPSSTNLEFSQLQPSELPLNT  
IMLLPSRSEVPWSSFPDSLEFVEASTVSLTDSEAHFTSAFIETTSYLESSLISHESAVALVPPGSES  
FDILTAGIQATSPLTTHVHTPILTESSLFSTLTPDDQISALDGHVSVLASFSKAIPTGTVLITDAYLPS  
GSSFVSEATPFPLTELTVVGPSLTPTEVPLNTSTEVSTTGAATGGPLDSTLMGDAASQSPPESSAAP  
PLPSLRPVTAFTLEATVDTPTLATAKPPYVCDITVPDAYLITTVLARRAVQEYIITAIKEVLRIFHNRAV  
ELKVYELFTDFTLVTSQPFVYTAISVINVLINSLKLRDQTPLILSVKPSFLVPESRFQVQTVLQFVPPS  
VDTGFCNFTQRIEKGLMTALFEVRKHHQGTYNLTVQILNITISSSRVTPRRGPVNIIFAVKSTQGFLNGS  
EVSELLRNLSVVEFSFYLGYPVLQIAEPFQYPQLNLSQLLKSSWVRTVLLGVMEKQLQNEVFQAEMERKL  
AQLLSEVSTRRRMWRRAVAAGNSVVQVNVSRLEGGDNPVQLIYFVEDQDGERLSAVKSSDLINKMDLQ  
RAAILGYRIQGVIAQPVDRVKRPSPEQSNNLWVIVGVVIVVILYWKLCRTDKLDFQPDV  
ANIQQRQKLQIPSVKGFDFAKQHLGQHNKDDILIIHEPAPLPGPLKDHTTPSENGDVPSPKSKIPSKNVR  
HRGRVSPSDADSTVSEESSERDAGDKTPGAVNDGRSHRAPQSGPPLPSSGNEQHSSASIFEHVDRISRPP  
EASRRVPSKIQLIAMQPIAPPVQRPSPADRVAESNKINKEIQTALRHKSEIEHHRNKIRLRAKRRGHYE  
FPVVDLSSGDTKERHRVYRAQMIDKILDPTASVPSVFIKPRKSSRIKRSKPRRKHQVNGCPADAEK  
DRLITDSDGTYRRPPGVHNSAYIGCSPDPDLPADVQTPSSVELGRYPALPPASQYIPQPSIEEARQT  
MHSLLDDAFALVAPSSQPASTAGVGVGPPGPLANSTPSQEERRATQWGSFYSPAQTANNPCSRYEDYGM  
TPPTGPLPRPGFGPLLQSTELVPPDPQQPQASAEAPFAARGIYSEEMPSVARPRPVGGTGSQIQHLTQ  
VGIASRIGAQPVEIPPSRGSQYGGPGWPSYGEDEAGRREATHMLGHQEYSSSPLFQVPRTSGREPSAPSG  
NLPHRGLQGPGLGYPTSTEDLQPGHSSASLIKAIREELLRLSQQKQSTVQNFHS

>E41L5\_HUMAN

MLSFFRRTLGRSMRKHAEKERLREAQRAATHIPAAGDSKSIITCRVSLLDGTDVSDLPKKAKGQELFD  
QIMYHLDLIESDYFGLRFMDSAQVAHWLDGTSIKKQVKIGSPYCLHLRVKFSSEPNNLREELTRYLFV  
LQLKQDILSGKLDPCFDTAVQLAAYNLQAEAGDYDLAEHSPELVSEFRFVPIQTEEMELAFKWKKEYRG  
QTPAQAEETNYLNKAKWLEMYGVMHVVKARDGNDYSLGLTPTGVLVFEGDTKIGLFFWPKITRLDFKKNK  
LTLVVVEDDDQGEQEHTFVFRLDHPKACKHLWKCAVEHHAFFRLRGPVQKSSHRSGFIRLGSFRYSGK  
TEYQTTKTKARRSTSFERRPSKRYSRRTLQMKACATKPEELSVHNNVSTQNGSQQAWGMRSALPVSPS  
ISSAPVPVEIENLPQSPGTDQHDRKCIPLNIDLLNSPDLEATIGDVI GASDTMETSQALNDVNVATRLP  
GLGEPEVEYETLKDTESEKLLQLEMENSPLLSPRSNIDVNINSQEEVVKL TEKCLNNVIESPGLNVMRVP  
DFKSNILKAQVEAVHKVTKEDSLLSHKNANVQDAATNSAVLNENNVPKESLETMLITPADSGSVLKE

ATDELDALLASLTENLIDHTVAPQVSSTSMITPRWIVPQSGAMSNGLAGCEMLLTGKEGHGKDKGISLIS  
PPAPFLVDAVTSSGPILAEAEVLKQKCLLTTEL

>FBSL\_HUMAN

MEAKVRPSRRSRAQRDRGRRREAARDARAQSPSSGDEPEPSPGKENAGLRGAPPRGAAPARTARPPRRR  
RRESSSQEEVVDGFAIASFSTLEALEKDMALKPHERKEKWERRLIKPRESETCPAEPSENRRPLEAG  
SPGQDLEPACDGARKVPLQPSKQMKVTVSKGGDRSDDDSVLEATSSRDPLSDSSAHAVSGRGYSCDSES  
GPDDKASVSGEKLFPAGTDKGPALKSEAKAGVPKVSGLERSRELSAESFLPTASPAPHAAPCGPPPG  
SRANPLVKKEPPAPHRHTPQPPPPQPRGLLPHTVPASLGAFAGHSQAAAANGLHGLSRSSSAPLGLGKHVS  
LSPHGPGLSTSHLALRSQAQHQHQAAMFAAPPTLPPPPALPASSLVLPGHPADHELLRQELNTRFLVQ  
SAERPGASLPGALLRAEFHQHQHTHQHTHQHTFAPFPAGLPPTPPAAPPFFDKYAPKLDSPYF  
RHSSVSFFPSFPPAIPGLPTLLPHPGPFGSLQGAFAQPKVSDPYRAVVKVSTCWEGPWQGRTLVPPGRPRG  
ARDSRSLQKTWVGAPAPLSASILSQKPGRWCAVHVQIAWQIYRHQQKIKEMQLDPHKLEVGAKLDFGR  
PPAPGVFAGFHYPQDLARPLFPSTGAAHPASNPFPSAHPGSFLPTGPLTDPFSRPSTFGGLGSLSSHAF  
GGLGSHALAPGGSIFAPKEGSSVHGLPSPHEAWNRLHRAPPSFPAPPWPKSVAERVSALTNHDREPDN  
GKEEQERDLEKTRLLSRASPATPAGHPVSGLLLRAQSELGRSGAPAEREAEPVKESRSPAKEEAAKMP  
ARASPPHKAAPGDVVKKEERGEDEASEPPAGGLHPAPLQLGLGRERLGA PGFAWEPFRGLELPRRAFFA  
AAPAPGSAALLEPPERPYRDREPHGYSPELRLGELERARAPHLPPAAPALDGALLPSL GALHFPRLSPAA  
LHNGLLARTPPAAAAALGAPPPLVTAAGPPTPPGPPRSRTTPLGGLGPGEARDYSPSRNPPEVEAR

>TRI39\_HUMAN

MAETSLLEAGASAASTAAALENLQVEASCSVCLEYLKEPVIIECGHNFCACITRWEDLERDFPCPVCR  
KTSRYRSLRPNRQLGSMVEIAKQLQAVKRKIRDESLCPQHHEALSFLCYEDQEA VCLICAI SHTHRAHTV  
VPLDDATQYKEKQLKCLEPLEKQLQEITRCKSSSEKKPGELKRLVESRRQQILREFEELHRRLEDEEQV  
LLSRLEEEEDILQRLRENAHLGDKRRDLAHLAAEVEGKCLQSGFEMLKDVKSTLEKNIPRKFGGSLST  
ICPRDHKALLGLVKEINRCEKVTMEVTSVSIELEKNFSNFPQQYFALRKILKQLIADVTLDPETAHPNL  
VLSERKSVKVFVETRLRDLDPTRRFTFYPCVLATEGFTSGRHYWEVEVGDKTHWAVGCRDSVSRKDEL  
TPLPETGYWRVRLWNGDKYAATTPFTPLHIKVKPKRVGIFLDYEAGTLSFYNVTD RSHIYTFDTFTFK  
LWPLFYPIRAGRKNAAPLTI RPPTDWE

>TPIP1\_HUMAN

MGSSSEASFRSAQASCSGARRQGLGRGDQNL SVMPPNGRAQTHTPGWVSDPLVLGAQVHGCGR GIEALS  
SSGSWSSATVWILTGLGLSRPFLPGATVLRDRPLGS AFELSYDQKKAPLRLQ

>Q9HCN2-3

MGSSSEASFRSAQASCSGARRQGLGRGDQNL SVMPPNGRAQTHTPGWVSPCSEN RDGLLPATAPGR LCSH  
RGADIPSFQTHQDPVTASGSSELHADCPQFRALDRAGN

>TMM8A\_HUMAN

MGRAGTGTGGEA VAAVAGPLLLLLLARPPPASAGYSGKSEVGLVSEHFSQAPQR LSFYSWYGSARLFRF  
RVPPDAVLLRWLLQVSRESGA ACTDAEITVHFRSGAPPVINPLGTSFPDDTAVQPSFQVGVPLSTTPRSN  
ASVNVSHPAPGDWVFAAHLPPSSQKIELKGLAPTCA YVVFQPELLVTRVVEISIMEPDVPLPQTLLSHPSY  
LKVFVPDYTRELLLELRDCVSNGLGCPVRLTVGPVTLPSNFQKVLCTGAPWPCRLLLSPPPWDRWLQV  
TAESLVGPLGTVAFAVAAL TACRPRSVTIQPLLQSSQNQSFNASSGLLSPSPDHQDLGRSGRVDRSPFC

LTNYPVTREMDVVSVHFQPLDRVSVRVCSDTPSVMRLRLNTGMDSGGSLTISLRANKTEMRNETVVVAC  
 VNAASPFLGFNTSLNCTTAFQGYPLSLSAWSRRANLIIPYPETDNWYLSLQLMCPENAEDCEQAVVHVE  
 TTLVLPCLNDCGPYGQCLLLRRHSYLYASCSCKAGWRGWSCTDNSTAQTVAQQRAATLLLTLNLMLFLA  
 PIAVSVRRFFLVEASVYAYTMFFSTFYHACDQPGAEVLCILSYDTLQYCDFLGSAAIWTILCMARLKT  
 VLKYVLFLLGLTVIAMSLQLDRRGMWNMLGPCLFAFVIMASMWAYRCGHRRQCYPYTSWQRWAFYLLPGVS  
 MASVGIAYTSMSTSDNYYYTHSIWHILLAGSAALLLPPPDQPAEPWACSQKFPCHYQICKNDREELYAV  
 T

>GPN1\_HUMAN

MAASAAAELQASGGPRHPVCLLVLMAGSGKTTFVQRLTGHLHAQGTTPYVINLDPVHEVPPANIDI  
 RDTVKYKEVMKQYGLGPNGGIVTSLNLFATRFQVMKFIKQAQNSKYVLIDTPGQIEVFTWSASGTIIT  
 EALASSFPTVVIYVMDTSRSTNPVTFMSNMLYACSIYKTKLPFIVVMNKTDIIDHSFAVEWMQDFEAFQ  
 DALNQETTYVSNLTRSMLVLDEFYSSLRVVGSVAVLGTGLDELQVTSAAEYEREYRPEYERLKKSL  
 ANAESQQREQLERLRKDMGSVALDAGTAKDSLSPVLHPSDLILTRGTLDEEDEEADSDTDDIDHRVTEE  
 SHEEPAFQNFMQESMAQYWKRNK

>Q9HCN5\_HUMAN

MSPSPTALFCL

>SDF2L\_HUMAN

MWSAGRGAAPVLLGLLLALLVPGGGAAKTGAELVTCGSVLKLLNTHHRVRLHSHDIKYGSGGQSVT  
 GVEASDDANSYWRIRGGSEGGCPRGSPVRCQAVRLTHVLTGKNLHTHHFPSPLSNNQEVSAFGEDGEGD  
 DLLDLWTVRCSGQHWEREAARFQHVGTSVFLSVTGEQYQSPIRGQHEVHGMPANTHTWKAMEGIFIKP  
 SVEPSAGHDEL

>HHATL\_HUMAN

MGIKTALPAAELGLYSLVLSGALAYAGRGLLEASQDGAHRKAFRESVRPGWEYIGRKMDVADFEWVMWFT  
 SFRNVIIFALSGHVLFAKLCTMVAPKLRSMYAVYGALAVMGTMGPWYLLLLLGHCVGLYVASLLGQPWL  
 CLGLGLASLASFKMDPLISWQSGFVTGTFDLQEVLFHGGSSFTVLRCTSFALSCAHPDRHYSLADLLKY  
 NFYLPFFFFGPIMTFDRFHAQVSQVEPVRREGELWHIRAQAGLSVVAIMAVDIFFFHYILTIPSDLKFA  
 NRLPDSALAGLAYSNLVYDWVKA AVLFGVVNTVACL DHDLPQPPKCI T ALYVFAETHFDRGINDWLCKY  
 VYNHIGGEHSAVIPELAATVATFAITTLWLGPCDIVYLSFLNCFGLNFELWMQKLAEWGPLARIEASLS  
 VQMSRRVRALFGAMNFWAIMYNLVSLNSLKFTELVARRLLLTFPPQTLSILFVTYCGVQLVKERERTL  
 ALEEEQKQDKEKPE

>GALT9\_HUMAN

MAVARKIRTLTLTVNILVFGIVLFSVYCRQLQGRSQELVRIVSGDRRVRSRHAKVGTLDREAILQRDLHL  
 EEVYVNLNGLAKPIGLVEGPGGLGQGLAATLRDDGQEAEGKYEEYGYNAQLSDRISLDRSIPDYRPRK  
 CRQMSYAQDLPQVSVVFIFVNEALSVILRSVSVNHTPSQLLKEVILVDDNSDNVELKFNLDQYVNKRY  
 PGLVKIVRNSRREGLIRARLQGWKAATAPVVGFFDAHVEFNTGWAEPALSRIEDRRRIVLPAIDNIKYS  
 TFEVQQYANAAHGYNWGLRCMYIIPPQDWLDRGDESAPIRTPAMIGCSFVVDREYFGDIGLLDPGMEVYG  
 GENVELGMRVWQCGGSMEVLPCSRVAHIERTRKPYNNDIDYYAKRNALRAAEVWMDDFKSHVYMAWNIPM  
 SNPGVDFGDVSRERLALRQLKCRSFKWYLENVYPERVYNNLTLYGEVRNSKASAYCLDQGAEDGDRAIL  
 YPCHGMSSQLVRYADGLLQLGPLGSTAFLPDSKCLVDDGTGRMPTLKKCEDVARPTQRLWDFTSQGPV

SRATGRCLEVEMSKDANFGLRLVVQRCSGQKWMIRNWIKHARH

>PDE11\_HUMAN

MAASRLDFGEVETFLDRHPELFEDYLMRKGKQEMVEKWLQRHSQQGALGPRPSLAGTSSLAHSTCRGGS  
 SVGGGTGPNQSAHSQPLPGGGDCGGVPLSPSWAGGSRGDGNLQRRASQKELRKSFARSKAIHVNRTYDEQ  
 VTSRAQEPLSSVRRRALLRKASSLPPTTAHILSALLESRVNLPRYPPTAIDYKCHLKKHNERQFFLELVK  
 DISNDLDTLSYKILIFVCLMVDADRCSLFLVEGAAAGKTLVSKFFDVHAGTPLLPCSSTENSNEVQV  
 PWGKGIIGYVGEHGETVNIIPDAYQDRRFNDEIDKLTGYKTKSLLCMPIRSSDGEIIGVAQAINKIPEGAP  
 FTEDDEKVMQMYLPFCGIAISNAQLFAASRKEYERSRALLEVVNDLFEEQTDLEKIVKKIMHRAQTLLKC  
 ERCSVLLLEDIESPVVKFTKSFELMSPKCSADAENSFKESMEKSSYSDWLINNSIAELVASTGLPVNISR  
 AYQDPRFDAEADQISGFHIRSVLCVPIWNSNHQIIGVAQVLNRLDGKPFDDADQRLFEAFVIFCGLGINN  
 TIMYDQVKKSWAKQSVALDVLSYHATCSKAEVDFKAANIPLVSELAIDDIHFDDFSLDVDAMITAALRM  
 FMELGMVQKFKIDYETLCRWLLTVRKNYRMVLYHNWRHAFNVCQLMFAMLTAGFQDILTEVEILAVIG  
 CLCHDLDRGTNNAFQAKSGSALAQLYGTSATLEHHHFHNAVMIQSEGHNIFANLSSKEYSDLMQLLKQ  
 SILATDLTLVFERRTEFFELVSKGEYDWNIKNHRDIFRSMLMTACDLGAVTKPWEISRQVAELVTSEFFE  
 QGDRERLELKLTPSAIFDRNRKDELPRQLLEWIDSICMPYQALVKVNVKLPMLDSVATNRSKWHEELHQ  
 KRLLASTASSPSPASVMVAKEDRN

>E41LA\_HUMAN

MGCFCVAPPEEFYCEVLLDESCLTTLTQQQGKSTKGSVVLDFVHFHVNLEIDYFGLRYCDRSHQTYW  
 LDPAKTLAEHKELINTGPPYTLVYFGIKFYAEDPCKLKEEITRYQFFLVKQDVLQGRGPCPVNTAAQLGA  
 YAIQSELGDYDPYKHTAGYVSEYRFVDPQKEELEEAIERIHKTLMGQIPSEAEINYLRTAKSLEMYGVDL  
 HPVYGENKSEYFLGLTPVGVVVYKNNKQVQKYFWPRIKTVHFKETQFELRVLGKDCNETSFFFEARSKTA  
 CKHLWKCSVEHHTFFRMPENESNSLSRKLKSKFGSIRYKHRYSGRTALQMSRDLISQLPRPDQNVTRSRSK  
 TYPKRIAQTQPAESNSISRITANMENGEGTIKIAPSPVKSFKKAKNENSPDTRSKSHAPWEENGPGQ  
 SGLYNPSDRTKSPKFPYTRRRNPSCGSDNSVQVRRRKAHNSGEDSDLKQRRRSRRCNTSSGSESEN  
 SNREYRKKRNRIRQENDMVSAPQWEAVLRRQKEKNQADPNRRSRHRSRSPDIQAKEELWKHIQKEL  
 VDPSGLSEEQLKEIPYTKIETQGDPIRIRHSHSPRSYRQYRRSQCSDGERSVLEVNSTDLVPPLPVTR  
 SSSDAQSGDATVHQRNGSKDSLMEEKPTSTNNLAGKHTAKTIKTIQASRLKTET

>SYF1\_HUMAN

MVVMARLSRPERPDLVFEEDLPYEEEIMRNQFSVKWLRVIEFKQGAPKPRLNQLYERALKLLPCSYKL  
 WYRYLKARRAQVKHRCVTDPAVEDVNNCHERAFVFMHKMPRLWLDYCFQFLMDQGRVTHTRRTFDRLRAL  
 PITQHSRIWPLYLRLRSHPLPETAVRGYRRFLKLSPEAEEYIEYLKSSDRLDEAAQLATVVNDERFV  
 SKAGKSNYQLWHELCDLISQNPDKVQSLNVDIAIRGGLTRFTDQLGKLWCSLADYYIRSGHFEKARDVYE  
 EAIRTVMTVRDFTQVFDQSYAQFEESMIAAKMETASELGREEEDVDLELRLARFEQLISRRPLLLNSVLL  
 RQNPVHVEWHKRVLHQGRPREINTYTEAVQTVDPFKATGKPHLWVAFKAFYEDNGQLDDARVILEK  
 ATKVNFQVDDLASVWCQCGEELRHENYDEALRLRKATALPARRAEYFDGSEPVQNRVYKSLKVSML  
 ADLEESLGTQSTKAVYDRILDRIATPQIVINYAMFLEEKHYFEESFKAYERGISLFWPNVSDIWSY  
 LTKFIARYGGRKLERARDLFEQALDGCPPKYAKTLYLLYAQLLEEGLARHAMAVYERATRAVEPAQQYD  
 MFNIYIKRAAEIYGVTHTRGIYQKAIIEVLSDEHAREMCLRFADMECKLGEIDRARAIYSFCSQICDPRTT  
 GAFWQTKWDFEVRHGNEDTIKEMLRIRRSVQATYNTQVNFMASQMLKVSQSATGTVSDLAPGQSGMDDMK  
 LLEQRAEQLAEEAERDQPLRAQSKILFVRSASREELAELAQQVNPEETQLGEDEDEDEMDLEPNVRL  
 QQSVPAAVFGSLKED



## &gt;FGF22\_HUMAN

MRRRLWGLAWLLARAPDAAGTPSASRGRPSYPHLEGDVRRRLFSSTHFFLRVDPGGRVQGTRWRHGQ  
 DSILEIRSVHVGVVVIAKAVSSGFYVAMNRRGRLYGSRLYTVDCRFREIEENGHTYASQRWRRRGQPMF  
 LALDRRGPRPGGRTRRYHLSAHFLPVLVS

## &gt;CEL2\_HUMAN

MRSPTAGVPLPTPPPLLLLLLLLPPPLLDQVGPGRSLGSRGRGSSGACAPMGWLCPPSSASNLWLYTS  
 RCRDAGTELTGHLVPHHDGLRVWCPESEAHIPPPAPEGCPWSCRLGIGGHLSPQGKLTLPPEHPCLKA  
 PRLRCQSCKLAQAPGLRAGERSPEESLGGRRKRNVNTAPQFQPPSYQATVPENQPAGTPVASLRAIDPDE  
 GEAGRLEYTMDALFDSRSNQFFSLDPVTGAVTTAEELDRETKSTHVFRVTAQDHGMPRRSALATLTILVT  
 DTNDHDPVFEQQEYKESLRENLEVGVEVLTVRATDGDAPPNANILYRLEGGSGSPSEVFEIDPRSGVIR  
 TRGPVDREEVESYQLTVEASDQGRDPGPRSTAAVFLSVEDDNDNAPQFSEKRYVVQVREDVTPGAPVLR  
 VTASDRDKGSNAVHYSIMSGNARGQFYLDAQTGALDVVSPLDYETTKKEYTLRVRAQDGGRPPLSNVSGL  
 VTVQVLDINDNAPIFVSTPFQATVLESVPLGYLVLVHVAIDADAGDNARLEYRLAGVGHDFPFTINNGTG  
 WISVAAELDREEVDFYSFGVEARDHGTPALTASASVSVTVLDVNDNPTFTQPEYTVRLNEDAAVGTSVV  
 TVSAVDRDAHSVITYQITSGNTRNRFSTISQSGGLVSLALPLDYKLERQYVLAVTASDGTQDQAIVV  
 NVTDANTHRPVFQSSHYTVNVNEDRPAGTTVVLISATDEDTGENARITYFMEDSIPQFRIDADTGAVTQ  
 AELDYEDQVSYTLAITARDNGIPQKSDTTYLEILVNDVNDNAPQFLRDSYQGSVYEDVPPFTSVLQISAT  
 DRDSGLNGRVFYTFQGGDDGDGDFIVESTSGIVRTLRRLDRENAQYVLRAYAVDKGMPARTPMEVTVT  
 VLDVNDNPPVFEQDEFVDFVEENSPIGLAVARVATADPDEGTNAQIMYQIVEGNIPVFLQDIFSGELTA  
 LVLDLYEDRPEYVLVIQATSAPLVSRATVHVRLDRNDNPPVLGNFEILFNNTVNRSSFPGGAIGRVP  
 AHDPIISDSLTYFERGNESSLVLLNASTGELKLSRALDNNRPLEAIMSVLSDGVHVSVAQCALRVTI  
 TDEMLTHSITLRLLEDMSPERFLSPLLGLFIQAVAATLATPPDHVVVFNVRDQDAPGGHILNVSLSVGQP  
 PPGGGPPFLPSEDLQERLYLNRSLLTAISAQRVLPFDDNICLREPCENYMRCSVLRFDSSAPFIASSS  
 VLFRIHPVGGLRRCRCPGFTGDYCETEVDLCYSRCPGPHGRCSREGGYTCLCRDGYTGEHCEVSARSG  
 RCTPGVCKNGGTCVNLVGGFKCDCPSGDFEKPYPQVTTTRSFPAHSFIFRGLRQRFHFTLALSFAKER  
 DGLLLYNGRFNEKHDFVALEVIQEQLTFSAGESTTTVSPFVPGGVSQDQWHTVQLKYNKPLLQGTGL  
 PQGPSEQKVAVVTVGCDTGVALRFGSVLGNYSAAQGTQGGSKSLDLTGPLLLGGVPDLPEFPPVRRM  
 QFVGCNRNLQVDSRHIDMADFIANNGTVPGCPAKKNVCDNCHNGGTCVNWDAFSCCEPLGFGGKSCA  
 QEMANPQHFLGSSSLVAWHGLSLPISQPWYLSLMFTRQADGVLLQAITRGRSTITLQLREGHVMSVEGT  
 GLQASSLRLEPGRANDGDWHHAQLALGASGGPGHAILSFDYGGQRAEGLNLPRLHGLHLSNITVGGIPGP  
 AGGVARGFRGCLQGVVRSVSDTPEGVNSLDPVSHGESINVEQGCSLPDCSNPCPANSYCSNDWDSYSCSD  
 PGGYGDNCTNVCDLNPCEHQSVCTRKPSAPHGYTCEPPNYLGPYCETRIDQPCPRGWWGHPTCGPCND  
 VSKGFDPDCNKTSGECHKENHYRPPGSPTCLLDCYPTGSLSRVCDPEDGQCPCPKPGVIGRQCDRCNDP  
 FAEVTNGCEVNYDSCPRAIEAGIWWPRTRFGLPAAAPCPKGSFGTAVRHCDEHRGWLPPNLFNCTSITF  
 SELKGAERLQRNESGLDSGRSQQALLLRNATQHTAGYFGSDVKVAYQLATRLLAHESTQRGFGLSATQ  
 DVHFTENLLRVGSALLDTANKRHWELIQQTEGGTAWLLQHYEAYASALANMRHTYLSPTIVTPNIVIS  
 VVRDLKGNFAGAKLPRYEALRGEQPPDLETTVILPESVFRETPPVVRPAGPGEAQEPEELARRQRRHPEL  
 SQGEAVASVVIYRTLAGLLPHNYDPDKRSLRVPKRPIINTPVVSVSHDDEELLPRALDKPVTVQFRLLE  
 TEERTKPICVFNHSLVSGTGGWSARGCEVFRNESHVSCQCNHMTSFAVLMVSRRENGEILPLKTLT  
 YVALGVTLAALLLTFFFLTLLRILRSNHGIRRNLTAAALGLAQLVFLGGINQADLPFACTVIAILLHFLY  
 LCTFSWALLEALHLYRALTEVRDVNTGPMRFYMLGWVPAFITGLAVGLDPEGYGNPDFCWLSTIYDTLI  
 WSFAGPVFAVMSVFLYILAAASCAAQRQGFQEKKGPVSGLQPSFAVLLLLSATWLLALLSVNSDTLLF

HYLFATCNCIQGPFIFLSYVVLKKEVRKALKLACSRKPSDPALTTKSTLTSSYNCPSPYADGRLYQPYG  
 DSAGSLHSTSRSGKSQPSYIPFLLREESALNPGQPPGLGDPGSLFLEGDQDQHPDPTSDSDLSLEDDQ  
 SSGYASTHSSDSEEEEEEEEEAAFPGEQGWDSLLGPGAERLPLHSTPKDGGPGPKAPWPGDFGTAKE  
 SSGNGAPEERLRENGDALSREGSLGPLGSSAQPHKGILKKKCLPTISEKSSLLRPLEQCTGSSRGSSA  
 SEGSRGGPPPPPPRQSLQEQLNGVMPIAMSIKAGTVDESSGSEFLFFNFLH

>DPOD4\_HUMAN

MGRKRLITDSYVVKRREGPAGHSGKELAPELGEEPQRDEEEAELELLRQFDLAWQYGPCTGITRLQRW  
 CRAKQMGLEPPPEVWQVLKTHPGDPRFQCSLWHL YPL

>BRMS1\_HUMAN

MPVQPPSKDTEEMAEGDSAAEMNGEEEESEEERSGSQTESEESSEMDEDEDYERRRSECVSEMLDLEKQ  
 FSELKEKLFRRERLSQLRLRLEEVAERAPEYTEPLGGLQRSLKIRIQVAGIYKGFCLDVIRNKYECELQG  
 AKQHLESEKLLLYDTLQGELQERIQRLEEDRQSLDLSSEWDDKLHARGSSRSWDSLPPSKRKKAPLVSG  
 PYIVYMLQEIDILEDWTAIKKARAAVSPQKRKSDGP

>ZN304\_HUMAN

MAAAVLMDRVQSCVTFEDVFVYFSREEWELLEEAQRFLYRDVMLENFALVATLGFWCEAEHEAPSEQSVS  
 VEGVSQVRTAESGLFQKAHPCEMCDPLLKDLHLAEHQGSHLTQKLCTRGLCRRRFSFSANFYQHQQHN  
 GENCFRGDDGGASFVKCTVHMLGRSFTCREEGMDLPDSSGLFQHQTTYNRVSPCRRTECMESFPSSSL  
 RQHQQDYDQGMLFSCGDEGKAFLDFTLLDSQMTAEVPRFRCLPCGNVFKESALINHRKIHSGEISHV  
 CKECGKAFIHLHHLKMHQKFHTGKRHYTCSECGKAFSRKDTLVQHQRVHTGERSYDCSECGKAYSRS  
 SHLVQHQRVHTGERPYKCNKCGKAFSRKDTLVQHQRVHTGERPYECSECGKFFSQQSSHLIEHWRIHTG  
 ARPYE CIECGKFFSHNSSLIKHRRVHTGARSYVCSKCGKAFGCKDTLVQHQRVHTGERPYECSECGKAFSRKDTL  
 VQHQRVHTGERPYECGEGKFFSHSSNLIVHQRVHTGAKPYECNECGKCFSHNSSLILHQRVHTGARPYV  
 CSECGKAYISSSHLVQHKVHTGARPYECSECGKFFSRNSGLILHQRVHTGKPYVCSECGKAYSRS  
 SHLVRHQKAHTGERAHECNSFGGPLAASLKL V

>Q9HCX8\_HUMAN

MMHVNNPFRHSWI

>Q9HCY4\_HUMAN

LGMEAVSRVFPALAGQAPEEQGEI IKVKVKEEDHTWDQESALRRNLSYTRLSRQRFRQFCYQETPGPRE  
 ALSQLRELCRQWLNPEIHTKEQILELLVLEQFLTILPEELQSWVREHNPESGEEVVTLLLEDLERELDEPR  
 QQ

>S10AE\_HUMAN

MGQCRSANAEDAQEFSDVERA IETLIKNFHQYSVEGGKETLTPSELRLVTQQLPHLMPSNCGLEEKIAN  
 LGSCNDSKLEFRSFWELIGEAAKSVKLERPVRGH

>ZN334\_HUMAN

MKMKKFQIPVVSFQDLTVNFTQEEWQQLDPAQRLLYRDVMLENYSNLVSVGYHVS KPDVIFKLEQGEEPWI  
 VEEFSNQNPDIIDDALEKNKEIQDKHLTQTVFFSNKTLITERENVFGKTLNLGMNSVPSRKMPYKCNPGG  
 NSLKTNSEVIVAKKSKENRKIPDGYSFGKHEKSHLGMKKYRYNPMRKASNQENLILHQNIQILKQFPD

YNKCGKTFKRAILITQKGRQTERKPNECNECRKTFSKRSTLIVHQRIHTGEKPYVCSDCRKTFRVKTSL  
 TRHRRITHTGERPYECSECRKTFIDKSALIVHQKIHGGEKSYECNECGKTFFRKSALAEHFRSHTGEKPYE  
 CEKCGNAFSSKSYLVVHQRTHRGEKPNCKEKGKTFQCQSALTAHQRIHTGEKPYECSECEKTFQCQSAL  
 NVHRSHTGEKPYECSCGKFLCTKSALIAHQITHRGKSYECNECGKFFCHKSTLTIHQRTHTGEKHG  
 FNKCGRISIVKSNCSQCKRMNTKENLYECSEHGHAHSVKNSHLIVHQRTIWERPYECNECGRTYCRKSALT  
 HHQRTHTGQRPYECNECGKTFQKFSFVEHQRTHTGEKPYECNECGKSFCHKSAFRVHRRITHTGEKPYEC  
 NQCGKTYRRLWTLTEHQIHTGEKPYECNKCEKTFRHKSNFLLHQKSHKE

>AT131\_HUMAN

MAAAAAGVNAVPCGARPCGVRPDGQPKPGPQPRALLAAGPALIANGDELVAAVWPYRRLALLRRLTVLPF  
 AGLLYPAWLGAAAAGCWGWSSWVQIPEAALLVLATICLAHALTVLSGHWSVHAHCALTCTPEYDPSKAT  
 FVKVVPPTNNGSTELVALHRNEGEDGLEVLSEFEQKIKYSYDALEKKQFLPVAFPVGNFASYYSNRGFQ  
 EDSEIRAAEKFKGSNAEMVVPDFSELFKERATAPFFVQVFCVGLWCLDEYWYYSVFTLSMLVAFEASL  
 VQQQMRNMSEIRKMGNKPHMIQVYRSRKWRPIASDEIVPGDIVSIGRSPQENLVPCDVLLLRGRCIVDEA  
 MLTGESVPMKEPIEDLSPDRVLDLQADSRLHVIFFGKTVVQHIPPQKATTGLKPVDSGCVAYVLRRTGFN  
 TSQGKLLRTILFGVKRVTANNLETFIFILFLLVFAIAAAAYVWIEGKDPSSRNRYKLFLECTLILTSVVP  
 PELPIELSLAVNTSLIALAKLYMYCTEPPFRIPFAGKVEVCCFDKTGTLTSDSLVVRGVAGLRDGKEVTPV  
 SSIPVETHRALASCHSLMQLDDGTLVGDPLEKAMLTAVDWTLTKDEKVFPRSIKTQGLKIHQRHFHASAL  
 KRMSVLASYEKLGDLCYIAAVKGAPETLHSMFSQCPPDYHHIHTEISREGARVLALGYKELGHLTHQQ  
 AREVKREALCSLKFVGFIVVSCPLKADSKAVIREIQNASHRVVMITGDNPLTACHVAQELHFIEKAHTL  
 ILQPPSEKGRQCEWRSIDGSIVLPLARGSPKALALEYALCLTGDGLAHLQATDPQQLLRLIPHVQVFAV  
 APKQKEFVITSLKELGYVTLMCGDGTNDVGALKHADVGVALLANAPERVVERRRRPRDPTLSNSGIRAT  
 SRTAKQRSGLPPSEEQPTSQRDRLSQVLRDLEDESTPIVKLGDAIAAPFTSKLSSIQCICHVIKQGRCT  
 LVTTLMQFKILALNALILAYSQSVLYLEGVKFSDFQATLQGLLAGCFLFISRSKPLKTLRERPLNIF  
 NLYTILTVMLQFFVHFLSLVYLYREAQARSPEKQEQVDLYKEFEPVSLVNSTVYIMAMAMQMATFAINYK  
 GPPFMESLPENKPLVWSLAVSLLAITIGLLGSSPDFNSQFGLVDIPVEFKLVIAQVLLDFCLALLADR  
 LQFFLGTPLKLVPS

>LYRM4\_HUMAN

MAASSRAQVLSLYRAMLRESKRFSAYNYRITYAVRRIRDAFRENKNVKDPVEIQTLVNKAKRDLGVIRRQV  
 HIGQLYSTDKLIIENRDMPT

>E4YH25\_OIKDI

MSRLYTSANFIELKALKMNLRRKSADGFAIPTHFGHNWPSYDGKFSPTHLYSKASKAIGYKVNKIYRLD  
 FLIRRCLSGPLTNEAVKSINNFVNQREALLETSVEDSEKSLLLYLCWIKLKNFCPLTGRLKKEEILLRRD  
 SFLDRFEAIEPSGLLQLIYMNSQLVPREIMSDLVESLNPLFEESIFELLPFNPKCGMFKLEETVDANP  
 VKALFMHKLKHTGVFGDKSIQNFLKNPSIPMRYKHRHFQMI SWVLTLSSDGKKSRTDLLKKIYSPSLE  
 SDLSGLPLAEMVDLSNMIGLYEHEDYFTGAESLDEQTSLYYQSCDSCGSLTKPTFAKFAENNTKVEYDG  
 KTIPRGEAAKAMLEKIEHYQRSLEKQGVGQLEIAYQTIKFKISKPPDGLRRWISKSWVRRRFRVKKKK  
 I IKDMCFVDSIRKLLVIFIEDLRKYQEEFHLFSMSDFISQIYDDMEDKDSLLEDLRDIISQESECEPIE  
 IVNRLKLAQILLAYFPDLYSKNDLQDLFTQNTAFPPVYLQADG

>SPCS\_HUMAN

MNRESFAAGERLVSPAYVRQCEARRSHEHLIRLLEKKGKCPENGWDESTLELFLHELAIMDSNNFLGNC

GVGEREGRVASALVARRHYRFIHGIGRSGDISAVQPKAAGSSLLNKITNSLVLDIIKLAGVHTVANCFVV  
 PMATGMSLTLCFLTLRHKRPKAKYIIWPRIDQKSCFKSMITAGFEPVVIENVLEGDELRTDLKAVEAKVQ  
 ELGPDICILIHSTTSCFAPRVPDRLEELAVICANYDIPHI VNNAYGVQSSKCMHLIQQGARVGRIDAFVQ  
 SLDKNFMVPGGAI IAGFNDSFIQEISKMYPGRASAPSLDVLITLLSLGNGYKLLKERKEMFSYLSN  
 QIKKLEAYNERLLHTPHNPISLAMTLKTLDEHRDKAVTQLGSMFTRQVSGARVVPLGSMQTVSGYTFR  
 GFMSTNNYPCAYLNAASAI GMMQDVDFIKRLDRCLKAVRKERSKESDDNYDKTEDVDIEEMALKLDN  
 VLLDTYQDASS

>CHM1A\_HUMAN

MDDTLFLKFTAKQLEKLAKKAEKDSKAEQAKVKKALLQKNVECARVYAENAIRKKNEGVNWLRMASRVD  
 AVASKVQTAVTMKGVTKNMAQVTKALDKALSTMDLQKVSSVMDRFEQQVQNLVDVHTSVMEDSMSSATTLT  
 TPQEQQVDSLIMQIAEENGLEVLQDLSQLPEGASAVGESSVRSQEDQLSRRLAALRN

>PTPRH\_HUMAN

MAGAGGGLGVWGNLVLGLCSWTGARAPAPNPGRNLTVETQTTSSISLSWEVPDGLDSQNSNYWVQCTGD  
 GGTETERNNTATNVTVDGLGPGSLYTCVWVEKDVNSSVGTVTATAPNPVRNLRVEAQTNSSIALTWE  
 VPDGPDQNSTYGYEYTDGGGRAGTRSTAHTNITVDGLEPGCLYAFSMWVGKNGINSSRETRNATTAHNP  
 VRNLRVEAQTSSISLSWEVPDGTDPQNSTYCVQCTGDGGRTETRNTDTRVTVDGLGPGSLYTCVWVE  
 KDVNSSVEIVTSATAPNPVRNLTVEAQTNSSIALTWEVPDQNSTYGYEYTDGGGRAGTRSTAHTN  
 ITVDRLEPGCLYVFSVWVGKNGINSSRETRNATTAPNPVRNLHMETQTNSSIALCWEVPDGPYPQDYTYW  
 VEYTDGGGTETRNTNTSVTAERLEPGTYTFSVWAEKNGARGSRQNVSISTVPNAVTSLSKQDWTNST  
 IALRWTAQQPGQSSYSYVWVWREGMTDPRQTSTSGTDITLKEAGSLYHLTVWAERNEVRGYNSTLT  
 AATAPNEVDLQNETQTKNSVMLWKKAPGDPHSQLYVYVWQWASKGHPRRGQDPQANWVNQTSRTNETWY  
 KVEALEPGTYNFTVWAERNVAVSSTQSLCASTYPTVTTITSCVSTSAGYGVNLWSCPQGGYEAFELEV  
 GGQRGSQDRSSCGEAVSVLGLGPARSYPATITTIWDGMKVVSHSVVCHTESAGVIAGAFVGI LLFLILVG  
 LLIFFLKRRNKKKQKPELRDLVFSSPGDIPAEDFADHVRKNERDSNCGFADKYQQLSLVGHSSQSMVAS  
 ASENNAKNRYRNVLPYDWSRVPLKPIHEEPGSDYINASFMPGLWSPQEFIATQGPLPQTVGDFWRLVWEQ  
 QSHTLVMLTNCMEAGRVKCEHYWPLDSQPCTHGLRVTLVGEEVMENWTVRELLLQVEEQKTLVSRQFH  
 YQAWPDHGVPSPTLLAFWRMLRQWLDQTMEGGPPIVHCSAGVGRGTGLIALDVLLRQLQSEGLLGPFS  
 FVRKMRERPLMVQTEAQYVFLHQCILRFLQQAQAPAEKEVPYEDVENLIYENVAAIQAHKLEV

>TM9S3\_HUMAN

MRPLPGALGVAAAAALWLLLLLPRTADEHEHTYQDKEEVVLMNNTVGPYHNRQETYKYFSLPFCVGSK  
 KSISHYHETLGEALQGVLEFSGLDIKFKDDVMPATYCEIDLKKEKRDVYAIKNHYWYQMYIDDLPIW  
 GIVGEADENGEDYYLWYKLEIGFNGNRIVDVNLTSEGKVKLVNPKIQMSYSVKWKSVDVKFEDRFDK  
 YLDPSFFQHRHWFIFNSFMMVIFLVGLVSMILMRTLKDYARYSKEEEMDDMRDLGDEYGWKQVHGD  
 VFRPSSHPLIFSSLIGSGCQIFAVSLVIVIVAMIEDLYTERGSMSTAI FVYAATSPVNGYFGGSLYARQ  
 GGRRWIKQMFIGAFLIPAMVCGTAAFFINFIAIYYHASRAIPFGTMVAVCCICFFVILPLNLVGTILGRNL  
 SGQPNFPCRVAVPRPIPEKKWFMEPAVIVCLGGILPFGSIFIEMYFI FTSTFWAYKIYYVYGFMMVLVI  
 LCIVTVCVTIVCTYFLNAEDYRWQWTSFLSAASTAIYVYMYSFYFFKTKMYGLFQTSFYFGYMAVFS  
 TALGIMCGAIGYMGTSAFVRKIYTNVKID

>MOG1\_HUMAN

MEPTRDCPLFGGAFSAILPMGAIDVSDLRPVPDNQEVFCHPVTQSLIVELLELQAHVRGEEAARYHFED

VGGVQGARAVHVESVQPLSLENLALRGRCQEAWVLSGKQQA IAKENQQVAKDVTLHQALLRPLQYQTDLLL  
TFNQPPPDNRSSLGPENLSPAPWSLGDFEQLVTSLLHDPNIFGPQ

>E4YH36\_OIKDI

MTSILEVLIQQRIFAQRGLPELTHCLLIRAELSHISSPIHFQETGFISSLDLRSFFFRPLSVQSRVVGMMK  
WKLAFLLTLGVDSRSHEKGSRWALKQQRIELKYEANVNHMQSVIFIKFRAFLDGEKILKSPQKIFKQTQE  
FLGLPILIQDQHFFINKTSGYYCVHNPTTQEPHCMTTKSKGRTRKVDQEVLLALSEKQNSLEEFFLPFNV  
QLCEIIGPVLNFKNL

>E4YH48\_OIKDI

MQREPTALPPTTFTICFTGTTHVRLDGIERSLKEALDSVPELNLTRVGPPTITVQSRDEDFIPLSDYVP  
PPNTPIQESDQEPALSPTPPSECAQFNPADFPLPSDIDDLEQQFPENQEPEKVP IARDHFNHTRDELDEM  
FTSFDSHDPDAQNDKKGNKQCTDLTEKAMRFSVYDKLSALTTDNDKNSLGNLASPEQNSSIRSAHSS  
DDNEEMTFVYEGSSTVQSEGPKTSCLKKQKNSWSSDDDSRETRVEKKGNSLDIGDAKETKRQPCLKSN  
SRGEDLSQSRKSSLSRRESNAHSSSTTSRANYKSSFSDRNNDRQRSSTGYNPGSHRGSSVFHRN  
GNRRDRFRGSRRESDRDDFRRRDQDRAGSGREFRPREKRNTSSEREVSVYNDANRFGEKDYASRRNEDRS  
FSRFRDGGFQKYDARPSRDEHISNHNRPHFADREHRSYGGQSYRREFRGEHCTRSGRGAFGQTPDGHRR  
RRDRDSERNSDER

>Q9HD52\_HUMAN

MISQGLSPGQGPNTIAKGLIVNQTSGPRQQRAWKEMVQIKVGEKSKIRKFKNTSYGIMLTP

>GAGD2\_HUMAN

MRCHAHGPSCLVTAITREEGGPRSGGAQAKLGCWGYSPRSTWNPDRRFWTPQTGPGEGRHERHTQTQN  
HTASPRSPVMESPKKKNQQLKVGILHLGSRQKKIRIQLRSQCATWKVICKSCISQTPGINLDLGSQVVKV  
IIPKEEHCKMPEAGEEQPV

>MYO10\_HUMAN

MDNFFTEGTRVWLRENGQHFPSTVNSCAEIVVFRDYGQVFTYKQSTITHQKVTAMHPTNEEGVDDMAS  
LTELHGGSIMYNLFQRYKRNQIYTYIGSILASVNPYQPIAGLYEPATMEQYSRRHLGELPPHIFAIANEC  
YRCLWKRHDNQCILISGESGAGKTESTKLILKFLSVISQQSLELSLKEKTSVERAILESSPIMEAFGNA  
KTVYNNSSRFQKQVQLNICQKGNIQGGRIVDYLLEKNRVVRQNPGERNYHIFYALLAGLEHEEREFFYL  
STPENYHYLNQSGCVEDKTIQSDQESFREVIITAMDVMQFSKEEVREVSRLLAGILHLGNIEFITAGGAQVS  
FKTALGRSAELLGLDPTQLTDALTQRSMFLRGEEILTPLNVQQAVDSRDSLAMALYACCFEWWIKKINSR  
IKGNEDFKSIGILDIFGFENFEVNHFEQFNINYANEKLEQYFNKHIFSLQLEYSREGLVWEDIDWIDNG  
ECLDLIEKKLGLLALINEESHFPQATDSTLLEKLHSQHANNHFYVVKPRVAVNNFGVKHYAGEVQYDVRGI  
LEKNRDTFRDLDLNLRESRFDIYDLFEHVSSRNQDTLCKGSKHRRPTVSSQFKDSLHSLMATLSSSN  
PFFVRCIKPNMQMPDQDQAVVLNQLRYSGMLETVRIRKAGYAVRRPFQDFYKRYKVLMLRNALPEDVR  
GKCTSLQLYDASNSEWQLGKTKVFLRESLEQKLEKRREEEVSHAAMVIRAHVLGFLARKQYRKVLYCVV  
IIQKNYRAFLRRRFLHLKKAIVFQKQLRGQIARRVYRQLLAEKREQEKKKQEEEEKKKREEEERERE  
RERREAELRAQQEEETRQEQLEALQKSQKEAELTRELEKQKENQVEEILRLEKEIEDLQRMKEQQELS  
LTEASLQKLQERRDQELRRLEEEACRAAQEFLESNFDEIDECVRNIERSLSVGSEFSSELAESACEEKP  
NFNFSQPYPEEEVDEGFEADDDAFKDSNPSEHGSDQRTSGIRTSDDSEEDPYMNDTVVPTSPSADST  
VLLAPSVQDSGLHNSSSGESTYCMPQAGDLPSPDGDYDYDQDDYEDGAITSGSSVTFNSYGSQWSPD

YRCSVGTYNSSGAYRFSSEGAQSSFEDSEEDFDSRFDTDELSYRRDSVYSCVTLPYFHSFLYMKGGMLN  
 SWKRRWCVLKDETFLWFRSKQEALKQGWLHKKGGSSSTLSRRNWKKRWFVLRQSKLMYFENDSEEKLGKT  
 VEVRTAKEIIDNTTKENGIDII MADRTFHLIAESPEDASQWFSVLSQVHASTDQEI QEMHDEQANPQNAV  
 GTLDVGLIDSVCASDSPDRPNSFVIITANRVLHCNADTPEEMHHWITLLQRSGDTRVEGQEFIVRGWLH  
 KEVKNSPKMSSLKLRWFVLTNSLDYKSSSEKNALKGLTLVLSLCSVPPDEKIFKETGYWNVTVYG  
 RKHCYRLYTKLLNEATRWSAIQNVTDTKAPIDTPTQQLIQDIKENCLNSDVVEQIYKRNPILRYTHHPL  
 HSPLLPLPYGDINLNLKDKGYTTLQDEAIKIFNSLQQLESMSDPIPIIQGILQTGHDLRPLRDELYCQL  
 IKQTNKVPHPGSGVGNLYSWQILTCLCTFLPSRGILKYLKFKLRIREQFPGSEMEKYALFTYESLKKTK  
 CREFVPSRDEIEALIHRQEMTSVYCHGGGCKITINSHTTAGEVVEKLIRGLAMEDSRNMFALFEYNGH  
 VDKAIESRTVVADVLAKFEKLAATSEVGDLPWKFYFKLYCFLDTONVPKDSVEFAFMFEQAHEAVIHGHH  
 PAPEENLQVLAALRLQYLQGDYTLHAAIPPLEEVYSLQRLKARISQSTKTFTPCERLEKRRTSFLEGLR  
 RSRFTGSSVVRQKVEEQMLDMWIKKEVSSARASIDKWRKFQGMNQEAMAKYMALIKWPGYGSTLFDV  
 ECKEGGFPQELWLGVSADAVSVYKREGRPLEVFQYEHILSFGAPLANTYKIVVDERELLFETSEVVDVA  
 KLMKAYISMIVKKRYSTTRSASSQGSSR

>Q9HD86\_HUMAN

MDNGGGHYLSEISQEHKHAHSHSYVEALKKKKAGCGSRLQSQHPGRLRRVDHLRSGVQDQPDQHGETL  
 SPPKTQN

>CF050\_HUMAN

MANTQLDHLHYTTEFTRNDLLICKKFNMLMDEDIISLLAIFIKMCLWLWKQFLKRGSKCSETSELLEK  
 VKLQLAFTAYKYVDICFPEQMAYSRYIRWYIH

>RETN\_HUMAN

MKALCLLLLPVLGLLVSSKTLCSMEEA INERI QEVAGSLIFRAISSIGLECQSVTSRGLATCPRGFAVT  
 GCTCGSACGSWDVRAETTCHCQCAGMDWTGARCCRVQP

>Q9HDB3\_HUMAN

MNSRPRRRIDRLEHLHLTEFGLKLGQKIFLLNKRDFILFLSLF

>Q9HDC8\_HUMAN

LGAGQASLFGNNQPKIGGPLGTGAFGAPGFNTTATLFGGAPQAPV

>HRSL1\_HUMAN

MAFNDCFSLNYPGNPCPGDLIEVFRPGYQHWALYLGQGYVINIAPVDGIPASFTSAKSVFSSKALVKMQL  
 LKDVVGNDRYRINNKYDETYPLPVEEIKRSEFVIGQEVAYNLLVNNCEHFVTLRYGEGVSEQANRAI  
 STVEFVTAAGVFSFLGLFPKGQRAKYY

>RHO1\_ASHGO

MSQQMHNPSIRRKLVI VGDGACGKTCLLIVFAKGFQVYVPTVFDNYVADVEVDGRRVELALWDTAGQE  
 DYDRLRPLSYPSNVVLCYSDLPDSLENVMEKWISEVLYFCQGVPIILVGCKADLRNDPQVIEQLRQQ  
 GQQPVSAQAQEVADQIGAVEYIECSAKTGFVREVFEAATRASLMGKQGKSKAKSDKSKKSKCVL

>PP2A1\_EMENI

MDNNMEIDAARSPEPHHLSPTTDPGSIPTLDGWIESLMTCKQLAEEDVRRLCDRAREVLQEESNVQPVKC  
 PVTVCGDIHGQFHDLMELFRIGGPNPDTNYLFMGDYVDRGYYSVETVTLVCLKIRYPQRITILRGNHES  
 RQITQVYGFYDECLRKYGNANVWKYFTDLFDYLPLTALIENQIFCLHGGLSPSIDTLDNIRSLDRIQEV  
 HEGPMC DLLWSDPDDRCGWGISPRGAGYTFGQDISEAFNHNGLTLVARAHLVMEGYNWSQDRNVVTF  
 SAPNYCYRCGNQAAIMEIDEHLKYTFLQFDPCPRAGEPMVSRRTPDYFL

>PEX6\_PENCH

MDFEQYQSSQPRQRRRRAGKRRLNKNTPIAARLALDPQLRGKVGILSEDLANDLFQQALQDVTTSDD  
 GVLVYAIAPHTPTYSVEDQAWTILPVRIQPTERSPVAMSHSTVLPESADSLQPFLLQALGKVDSSRNSL  
 QAHRVSEIRILDVAPIHLDTIFVTVERHLLRNHDDVQTKFGGGFTNAQGPNGLWGKTGKSVEAKKYSKRA  
 ADAEQRLTAAREALGAQRIVHTGDVLPPLPSHPITYAPPPARISFCEPVSQGLLMSTTKIVLQAR  
 PQGIRAQQTMPRSRALLKQVAEDEADTSNEQFYSAEDKPGESGTEMEVTSAAEESSETEGSAGSMSDSS  
 DDSLEDMISLSAPELPQPPSGVMSSLTATPRAGRRSDGIHTPGSVASNFTSATMRPGRGGGKTFKVEG  
 LLQQVNEVLHPRPRDDEDVDSFVFDISTLAKIGCFSGDWVRIEAAEPEQLNMFASLKFGSFNDSPEDS  
 GDWRPVKIFGLSGLPSSKPRYAINHSGERRPSISQRPPTRLTPSVFVPPLLLGNINPKYLRI SPMTFAT  
 PNGSSKPGILQHMKNATAKNPLAKEVTLLKVSTPLSMDRVLQPALFAGLKQYFESRRRILKSGDLVGIS  
 VDEGLGRAVFSGTGSGDSASQEEDITIRLQGANATNAGTRKIGVAWFRVGVVAPTVEELETGEDQWG  
 GVAVLDPATTRMVQAGSDVSRVPGVLGNGWEYWLGVKTIKTVHDAPTPHGIVADPPQSVIPPLQQRIRD  
 LMSAATSPRAIQLGMKPVFILLRSQQRHIGKATVATRACSDIGIHTFPIDAYDILTEGGANGGDVKTEAY  
 LKARAERAFHCGANCTALLIRHIEVLTADRIVTAMSDILNDARVVIATTTDVETIPEGIRSLITHEFEMG  
 APEEKEREGILQNAVTERGIRLSADVDLGSIALKTAALVAGDLVDVVERAAGARTARLES LAEASKKISG  
 SEVFRVDVLLAGGDGARGVTKADFDAAVEAARKNFADSIGAPKIPNVGWDDVGGTLNVKDALVETIQPL  
 ERPELFAKGMKKRSGILFYGPPGTGKTLAKAIATEFSLNFFSVKGPPELLNMYIGESEANVRRVFRARD  
 ARPCVVFDELDVAPKRGNGQDSGGVMDRIVSLLAELDGMNGGEENSGGVFVIGATNRPDLDTALLR  
 PGRFDKMLYLGVSDTHRKQATILEALTRKFALHPDVSLDRVAEQPLTYTGADLYALCSDAMLKAITRKA  
 TAVDEKINALPNGPVSTAWFFDHLATKEDVNMVTEEDFLSAQGELVPSVSAKELEHFERIRQTFEAVDK  
 SKQDPAAPAAQTIAEAMEAFSLGSAIPEEAPTINGDSLTPGGIHGRKGLNRWPGNPVRSSTSGQSTSS  
 KGKGSVSKKGSRTGAESDGSVDGDEDMADANSKEDEDEDDYVVRTDHLRNPMEVE

>RL14\_THEAC

MKG IAGRQTRGLPLGANITCADNTGARSISLIDVKAHWGKARRIPAAGVGMFMASVKKGTPEMRSKVY  
 AVVIRQKRPYRRPDGTMVQFEDNAAVLVTDPGEVRGSEIKGPVAREAAERWPRIAAIASIIV

>LGUL\_PSEAE

MSFNTEVQPGICMEPDAITQEYVFNHTMLRVKDPKRSLDFYSRVLGMRLRLRDLFEEGRFSLYFLAMTRG  
 EEVPDAVDERQRYTFGRQSVLELTHNWGESDSDSYHNGNQDPRGFGHICFSVPDLVAACERFETLGVNF  
 VKPLDRGMKNVAFISDPDGYWVEIVQASLNGEMGR

>ETFD\_PSEAE

MEREYMEFDVVIVGAGPAGLSAACRLKQKAAEAGQEISVCVVEKGSEVGAHILSGAVFEPRALNELFPDW  
 KELGAPLNPVTGDDIYVLKSAESATKVPNFFVPKTMHNEGNYIISLGNLCRWLAQQAEGLVGVEIYPGFA  
 AQEALIDENGVVGRIVTGDLGVDREGNPKEGYTPGMELRAKYTLFAEGCRGHIGKQLIKKYNLDSEADA  
 QHYGIGIKEIWDIDPSKHKPGLVVHTAGWPLNDENTGGSFLYHLENNQVFGVLIIDL SYNPHLSPFDEF  
 QRYKHHPVVKQYLEGGKRVAYGARAICKGGLNSLPKMVFPGGALIGCDLGTLNFAKIKGSHTAMKSGMLA

ADAIAEALAAGREGGDELSSYVDAFKASWLYDELFRSRNFGAAIHKFGAIGGGAFNFIDQNIFFGGKIPVT  
 LHDDKPDYACLKASEAPKIDYPKPDGKLSFDKLSVFLSNTNHEEDQPIHLKLADASPIEKNLPLYDE  
 PAQRYCPAGVYEVVANDDGSKRFRQINAQNCVHCKTCDIKDPAQNITWVAPEGTGGPNYPM

>Y2418\_PSEAE

MKKVLGIYGNANRHWVGDGFPVRSLSYNTLGGHISPFLLLDYAGPADFPQAQRGQVGHPRGFETVT  
 IVYQGEVEHHDSTGAGGRIGPGDVQWMTAASGILHEEYHSERFRSTGGTLEMVQLWVNLPSSDKMPPRY  
 QTLLDADIPRVGLPDRAGELRVIAGRYGRHQGPALTHSPLAVWDVQLKAGKHLALDLPKGHTCAVVLRG  
 TLAVGDEIVREAQVALLDRDDPRLELEANNVQLLVLSGEPLDEPIIGYGFVMSREEIDQAIEDFENG  
 RFIRAH

>ACON1\_PSEAE

MPALDSLKTLRSLAVDGGKTYHYYSLPEAARTLGDGLKPLMSLVLENLLRWEDGSTVTGDDLKALAGWL  
 RRRSDREIQYRPARVLMQDFTGVPVVDLAAMRAAMAKAGGDPQKINPLSPVDLVIDHSVMVDKFASES  
 AFEQNVIEIEMQRNGERYAFLRWGQNAFDNFSVPPGTGICHQVNLEYLGRVTWTKDEDGRTYAFPDTLVG  
 TDSHTTMINGLGVLGWVGGIEAEAAMLGQPVSMLEPEVIGFKLTGKLRGITATDLVLTVTQMLRKKGV  
 VGKVFVEFYGDGLADLPLADRATIANMAPEYGATCGFFPVDEITLGYLRLSGRPESTVKLVEAYSKEQGLW  
 REKGHEPVFTDLHLDMGEVEASLAGPKRPQDRVALQNVASAFNEFLGLQLHPSSTEEGRLLSEGGGGTA  
 VGANAAFGEIDYQHDGQTHRLKNGAVVIAAITSCTNTSNPSVMMAAGLLAKKAVEKGLQRKPWVKSSLAP  
 GSKVVTDYFKAAGLTRYLDELGFDLVGYGCTTCIGNSGPILLEPIEKAIQQADLTVASVLSGNRFEGRVH  
 PLVKTNWLASPLVVAAYALAGSVRINLSEEPLGTGKDGQPVYLKDIWPSQKEIAEAIQKVDTEMFHEYA  
 EVFAGDEKWQAIQVPQSDTYEWQADSTYIQHPPFFEHIAEAPPAIADVEQARVLAVLGDSVTTDHISPAG  
 NIKADSPAGRYLREHGVPEKDFNSYGSRRGNHEVMRGTANIRIKNEMLGEEGNTLYVPSGEKLAIY  
 DAAMRYQEDGTPLVIVAGKEYGTSSRDWAAKGTNLLGVKAVIAESFERIHRNLVGMGVLPLQFENGQD  
 RKSLKLTGKEVLNIRLGGELKPHMPLSVEVTREDSQDSFKVLCRIDTLNEVEYFKAGGILHYVLRSM

>COBP\_PSEAE

MRDLILGGARSGKSRLAERLAAESGLAVSYIATAQAGDGMGRRIAEHRARRPAHWRTLEEPLALAAATLR  
 SEAEAGRCLLDCLTLWLTNLLCDDPQRLDGEREALLECLGELPGRIILVSNETGLGVVPLGELSRRYV  
 DEAGWLHQAIACERCERTFTVAGLPMPLKGEPL

>PR2\_DROME

MEYPQIDLYEFLTESELQQYYNAVKNELKITNAAQFKYAADEDLRFIGLSRPEIRRLRKFYEKHFPHSYL  
 SKIKRLLQAPGTMVKREEAPGGGSQVALDGSSASACSSLAAKNGASSPSKVPNNKHIIPADISVNKQLG  
 TGEFGIVQQGVWSNGNERIQVAIKCLCRERMQSNPMEFLKEAAIMHSIEHENIVRLYGVLATDSLMLVT  
 ELAHLRSLLECLKDGLRVSFLTIPTLCEFALQICNGMYLEQKRLIHRDLAARNILVFSKDKVKISDFG  
 LSRALGVGKDYKTNFNVNKLPIAWCAPECINYLRFNASDVWAFGVCLWEMFSYGFQPWAALTGLQIL  
 EAIDAPNYQRLEQPDCCPSEYYTLMMKCWQDDAAKRPFRFGEIYDQLPDMKPEQLKAVVNCTEPKKDHLLY  
 RQGDII SVLDRNTGTPFWKGVLTGKTGYFNPSNTVAFLEGLPSSTRDSFSRVDHRI SKRKLRTMISK  
 PQNDFKHTGHVIGDGFATGDI AIFLGSSQYNHVPKQIVTPYKPSDIEQTPLLLPPTPTSPDSLQTASGY  
 FPEGANSGGAMGTSMPNPTFIPSAEHTPKLIATNGQSSFDFAFGSTNPPFPNRGDDELEFGLHNYGADGKS  
 VHSETGWRPTSRSIVDDPHEYHEISDDEIAADKLDGFPSSLDEINSMFGSISAATGSHPKSPGFDHVNNK  
 NEITEMSAKLGQKSGDTNGNKHGHLLPTLSKKKSSGTVKPISVKDEKILNHAIEIANEISARSMIDLVS  
 DQTPVIHSPKRKFSFRPHLSNNGSGDKSGGLGTSGSAHTPHGNASFPFKKNFTEELQSIPIQSLIG



KEGLEAYNSLIERKALLDIGPSAATLLRHLDTDEFDLQSLHQSQRPMPLPTRGATQVRKAELAAGLSR  
 HNDENSNSLEACESPSYMTGHSYKFPPEAQPTQLPEPESPNIPLPPREGKKQVKTSTKRHRKYPLIIP  
 ANGLQRTLSKLADFGDEAAKSPEISTSSQPQGRAIEVVAVRPSGMRRPSRPSEREYENMPTVGKESAH  
 TYQNLDKLTPADAAGLDTASLQFESIMEADTSKEGILQSPDVTDFYFNFSIQKEHYNGKDAEFEATQI  
 SGLYVNDDELNRNDIESSRRTATPCSSCSALESEHSQPDALPSTESVSEVSRFSSVDNELAGNALFKKVR  
 ASVNMAMNRKSVAEATSLTSNQP GGASAKPQTEAEYFAATAARLADSNVSCEDLLEFSDKKPKGCERGVD  
 SDEVRIMVKVLGKDSTPNRCLGALEFINWDVHKS IKLIKLVSEANLSLEASFEALQQHEWDLHTTAH  
 KLNLGLKL

>Q9I7H5\_DROME

MLDRHCLYIGIFQLI IWVGVANGEFYSSVDSMQDLAQVEEELLNATRSYVESQQKQLDFYRRYVEQIKRE  
 HEWATSQKLLDDYLGHPLHAFRLIKRLVRDWSLIFEPILANNAREEFRAFVEVLSRDLGYPDQSELQGA  
 IKGLARLQKVYNLATSDLADGIIGGLNYGSDLRWRECYEIGVQLFDLGEYQRSLEWLQVAFILLRNSPRE  
 EKDADHYLSDIREYASMANFELGNPKKAARLLSQILESQPHTSAQQTQKYLESRVPGKNVQETKPSWFSN  
 YTRLCQGRRLPEERSGDPLRCYLDGKRHAYFTLAPLQVEPVHLDPDINVYHGMLSSKQILSIFEEADKEE  
 MVRSAVAGSGGEGTVRDLRVSQQTWLDYKSPVMNSVGRIIQFVSGFDMAGAEHMVANYGVGGQYEPHPD  
 YFEVNLKPNFEGDRISTSMFYLSDV EQGYTVFTKLVFLPPVKGALVMWHNLHRSLHVDARTLHAGCPV  
 IVGSKRIGNIWMHSGYQEFRPCNLTSDSYKSLAYRD

>Q9I7H8\_DROME

MPYEKFNKRRQWEDSGVLELIKLVKVCAYELRTIKRNGHLYVAMAKQLTSLGVPVTALEVHFVNNLTQ  
 RYRQEQKTFETTGIISTWKFYSQVDDVFKSLAHTGYKDKRMTSASNTSSLPSTSESPVWKNPMSQQEFN  
 SNNTEGFYKTEYGMHRHFMDSQPPNAGSVDNFMASAAVAVAASARLADNMDQQMNTAAGGSGG  
 SGGGGNTNGGVANYQKIKKSHEDYDKFVDIVKNIVDTHKSTPKVDTFGDFIKSYMKRWPERLQDEAIN  
 HITNYVIVKNMEHSMVSSHNEGPNRQ

>CCNB3\_DROME

MAPTKATTRAAITSGHHQLQAVNPILGALGAATRKLTRAAATGNIDPNVENMQTRAKRKADHSPIKN  
 DKIKRSALGNLTNNVKIMTLHPAQDEEQSGVGKKPTAQQALMDAKKQENLSVNVFGASKMTTRASSKV  
 EDSVENCHKVLDKLEEALARPKRPAKKTVLGEVQLPAMPNPMQIPVLLPPTHNLAAPQVAAVKP  
 VRRISNDFNKTEDSLYMSALEDVSSCDSMRLSGNFEAARRRS AKLQKTEQQPQLLLTLPETAPSQVVP  
 IPPVPEEVEDFDRKNWDDPFQVSHYAMDIFNYLKVREAEFPIADYMPRQIHLTTWMRTLLVDWMVEVQET  
 FELNHETLYLAVKIVDLYLCREVINKEKLQLLGAAFFIACKYDERQPPLIEDFLYICDGAYNHDELVRM  
 ERETLRVIKYDLGIPLSYRFLRRYARCAKVPMPPTLTLARYILELSLMDYANISFSDSQMASAALFMAIRM  
 HGGPGQLDKQITWTSTLIYYTGYQLADFAEIVTALNAGLHRKPRATIKTIRNKYSHKIFHEVAKVPLLTNQ  
 ELFQGNLDL NESLS

>Q9I7I1\_DROME

MNILRPRGMTQAEKDVFAHRQCGLDPNGHELLHMVYVCCPELGDVLPNKQTCGQTPVFRDRGAENAELN  
 EYPWMVLLLYENRSLIRYVLTAAHCVIGGYLTQNDLVLKS VRLGESTTDCITSESRCPLHDVEVGQTTV  
 HQGFTSSGGTYRNDIALRLQFPVRYTKTIQPICLLDAEFPLQDLNLQISGWDPTKSSQTLITSTVKERN  
 PADCLNRYPSFRSASQVCAGGQRKGDTCAGISGSPVMGIMSGVDEFVFLAGIASYGGQYCYCSAGIPGVY  
 TKIGHFSEWIKANLAP

>Q9I7I3\_DROME

MLGRIAVLLLLVGLFGPEVRSKVNDDQCGAFDEQMLNMQSTFAIPTEHQVVARIVYGKGFEGKIRDNG  
 CLGVLVSKRTVLAPAHCFVQYNGVAEAFSVHLGVHNKSAPVGVRCETDGYCVRPSQEIKLAEIAIHPDY  
 DSRTLKNSLAVLTLQRDAKIYPNVMPICMPPSSLNETLVAQTFVAVGLRVFEDFRLKTWVNTLSRGFCQ  
 SKVKTLVTSSNTVCGYHKQPVAAYLGLAPLVGLQKKGHVTVQNYLVGIMIDWRWENNRIMSSFLAIRNYMD  
 FIRQNSNSLIVRS

>Q9I7I4\_DROME

MVMLPLTLVLIIMRLDGMALQLNEQMRDLRNSHSEVPVYMEDYEALLPEGSTYNDLINEEFILPAS  
 KRTQLQILAAERARRCPYRYNGESMELEERNTLMKDSRSTFLPLGIPRECLGSGIELDIKPIDEEAYQ  
 RQKKRYQDIAPYWLEKIRIRERREAERHAEASAEISEATAALQSFWNEEGTREGIRMTQAKTMKRYMDN  
 KVDPCVDFYKYACGNWERLHPKPKAGFDTFEMLRESLDLVLRLNLEKNTPVHSAELRKSPVRNTLTK  
 LNEQGEGEADQAAELTAERLRRHIVSKRQLLNRLVRYKRYTNGTKRRLIETPRERTKEEEAAPPVV  
 LPKDKTKKSDNEEQLVHPTDFLQPHQDAQLKAKNLYRSCVNSAVLAKRGLEPLHTLIRELGGWPVLESQ  
 WSESNFNWQVLAATLRRYNDLILVQWVGADIKNSEENIVQFDQTGLGLPTREYFLQPSNAKYLQAYQRY  
 MAEVMHKMGASKADARVASELVAFETQLAGITAPAEQRLNVTKLYKRMTLDQLQAVVPEIKWRAYLQSL  
 QDREVLGTEEVVVIYAVEYMSKLVTLDETDPRTVSNYMMWRFVRRHRINNVDDRFDDIKQSFYHALFGREE  
 SPQRWKVCIQVNTNMGMVAVGSMFVSRYFDNNSKRDLRMTDLQQAQFRDILKTTDWLDDTTKQLAEKVV  
 NAMSLKIGYPDFILNPSELNSKYAGIEIYPEKYFENTLNVLLHTAKTEQAKLHERVKNKTWQTAPAIVNA  
 YYSRNKNQIMFPAGILQPPFYHRHFPKSLNFGGIGVVIGHELTHGFDDKGRLFDRNGNIHKWWTSSIRG  
 FDERARCIIAQYSNYTVEEVGIVLNGESTQGENIADNGGLRQAFHAYQRWLKEHPSEVSDEILPGLNMTG  
 PQLFFLNFGQVWCGAMRPEAIRNKLNTAIHSPGRFRVIGTLSNSVDFAREFNCPLGSPMNPQKKSVM

>Q9I7I6\_DROME

MLKSIVTVIRLHLEELWLRILGYIMRRFLRSAMIVFSWVVPYSRYTNKIVIRRKLPPIRSHLEIPAVD  
 LAKLIRTRKIKSEEVVEAYIERCRQVNPLINAIVQDRFEEALEEAREIDNVIAMGINSVESMEELTPLL  
 IPVTVKESIAVKGMTNAGRVFKTPQIAKSDAPVVEQIKRSGGILLVSNTPELCLLWETYNNTVGTQTKN  
 PYDLKRTPGSSGGEAALLASGASLLGLTSDIGSSRLPAMFSGIWGHKPTPYAVSFKGHHPTSDFPKWG  
 DFFTIAPMTRYAKDLPLLLKCMSDPTGPKLTDRPISVNGIRFFFMDNDGPGMMRPLSRDLHAAINRVA  
 TDFNAKRVNIRKMKWLDISLSAMLTMKNIETIYHKTEEGEQPKTVCKETVKYFFGCSDSILPSVIFGHL  
 QNFMKIIPNSRHKLASIEALKTEFKEMLGNDGVFLYPTFPNTAHQHYQIYHKLEPMYMAIFNTLGLP  
 VTNCMIGLDRRNLPMGIQVVANPGQDHLAVAREMERRYGGWVRPPSEDSHSSGGSSKQRG

>Q9I7J0\_DROME

MAPRNKEQEVEVNWVFAVIGEKVPSGQYEDILKDGIWLCCLANKLAPGSVKKIQERGTNFQLMENIQR  
 QAAVKKYGVPEEEIFQTADLFERRNIPQVTLISLYALGRITQKHPEYTGPTLGPKMADKNERSFTEEQLRA  
 HEGELNLQMGFNKGASQAGHGMGNTRHM

>Q9I7J1\_DROME

MQANSSTTTTTTTTKTKLSSGTGTNMISSVAVTSAIKTTTTTRKPAGSGVSSKVSQAQATNSTPASSD  
 SNAEIAELTKKINDHADAIYHTWKSQGIPPELLTMYTSAASGDLADVASPTADAAGLQKMTSVFNKD  
 KEQRGKSNLTKSDITANGKVKKAAVSSFSPPDQALQSPKKVAAVTVSKPLPDVNLNYDISLDLVNN  
 LSSQQTQNLKISELIQQKDVAAATVGGKRQNSKANSSSINSNHIGNSASSNKLTASEQPTKKQSKANS  
 SGSTRTGSAAVSLDVVDGPSAARIANSTAVSDKGGEPAAATGSRKSSKTKETSADSKPATKEKPTAVATVA

NARKSTSRIATDNAGNMAAATAAAAAATSATSAATATSM DATPATAASTMPTLNKVKPTSGARAALANGQ  
 DKMNLTRGSVAERVLMEFEKCPDVRHAFLNKRPQTDPPPKSLMKVKLHATPPPPQEQNLLQKEIRSTK  
 SVYIPRFYFPHGKQPNIAMERVVRGILSAFDSFPNNQVTKDELPRILKICGLPFYWRMPVMVFCQSAST  
 GLVERQRFVEFWKQMNVCHEAASRFVYILSRGQRFRSYIVPEDLPMVQDVVDTHPGLAFLKEATEFH  
 RYVHTVIARIFYSVNRWSGKITIAELKRSDLLEMISLLEEEEDINQIMAFFSYEHFYVIYCKFWELDKD  
 HDLLINQEDLAKHSDHALSSRIVERIFSGCVTRSDNKKAPEDEAKMSYTDVWFVILSEEDKRTPTAIEYW  
 FRCMDVDGDGVLSMYELEYFYEEQQQRMEGIGIECLPFEDCLCQMLDMIKPANRDCITLGLDKRCKMTHV  
 FFDYFFNLEKYLDHEQRDPFASQRDEYTSWDRFAAQEYELLI SEEND

>Q9I7J2\_DROME

MRSLEGSRRRQVEQLHLVLEAKDQDQELNTRQEQEQSVARPSMANERKQSSPKVELTKLSHDLIEECKRS  
 QEDSLLSRHLRHELEKLPDRSRRELVRKQRNGCAPLFIACKRGAVDIAEYLITICEANIEQRGHFVPEP  
 NSFHYVSPLWAAVVSGLSMVKYLVRIGCDINATSDSGSTPVSACYMTHVDIVKFLVENGADIKRPNIN  
 GGTCLINSVQSVQLCLYLVRKGADINARDIQDKTALHYAIEHRLDTTKLLIEQGADPYARSRYGDDALR  
 TACLKGAHHIFDFLKKQLHYTPARLAEAEHELMGSTFLDEHNSRVCILHWRMAHHIRAAYSPIEKKPQV  
 PLRTAYENAVEFSTLEELDNIATDMDAMRTQSLICERVLGLTHKDMFLRFTFRGASYADSLQLQRCIDL  
 WRFLLEVRVSNWSILHFETCFAAQALVRLMLDLHVQNSSHIRSDARARFVHQDKVLPREFDVLGVFRTLS  
 ESAIVVKHLLLLRPVFRQQENYDRVMRCLAHLIYLLINTVHTEAQNKLICQAVHEAVVGNLRSASTAD  
 TMLHLCASRLNVIKSGYITDDNFADKTVFPNADVIKLLIQCGVDVNTKNEAKSTPLHVACQPYNYDNEIV  
 HLLLKCGGDIDQPNRADKRPYDLIASNPTSTIPLNFVTLQCLAATAISKHRIPYHNQLHRQLEKFRVNH  
 EP

>JUPIT\_DROME

MAAYAAFKHVELYVNGKAKKRVLRPPGGGSSDIFGSEMPQTPRNVKNRMASNIFAAEKDNGVKNNVRQGA  
 HRFYFIGDAPRRGQKTVDSHSRFLGEPTRPIPGKNHMKSSIPFGQNTAEVAAQKLLTTNGHYNGKSGSV  
 SSASSVSSSTENLKMNSGSRSEGNPVTGEGYKVVANEYSQRQESSNGGTPVINKNRIPPGGYSSGLW

>Q9I7K0-3

MSTRPDTKETSPRVSLCPPEPARTETPIPPADDALSIDNSCRDSEVGDVPADNSTVTKSDQVNEGCQTRR  
 DSGNPEQPYSLNKMAGVSNVKEPLGLCPNEIKEEQQACSKLDSRNPITGLGLNGDGVGGLKPKKLKIRE  
 GNPVTGEGYKVVANEYSQRQESSNGGTPVINKNRIPPGGYSSGLW

>Q9I7K4\_DROME

MQPFIVIRNYTQDDELKQELVRDYIMSFNKSFFVYCFREITLQFIVITWAIFFIFLGVPLLFCALTVP  
 ACIFCLFTGTYSFYFSKAVELMRKPSQSLVAECYEPFIFRCSPKEASYQIFTENCPEEYTYTRKFRRI  
 VAAISVKNHHAVYNAAWIYRFAIDPHYCQTIMDPMIKLVKNCIIGGYASLECTISEWQESERDFYDDF  
 GFVTRQIYHKKIIGSSLAVMKTQLTYGLRTDGAALHKQN

>NASP\_DROME

MSAEAEAVTTATADVSSPSKTVAVEPVAADTTDPNAPAVSTEGSGKAEQERAEEKILKGKELFSQGSRN  
 LVKSYDEAADELQVQCQLYEEVYGELADELQGPLLLYAKALIAMALDENKVIDPDEAADDDDEDVDDDE  
 EESAEDGAAKKEEKDTEAANGASSNGKELDTIKEGSDEADSTGEAEQAQSDKPSKVPVPTGVDEVSS  
 SNGGGGAAVNDDERPSTNGEVTASCNGAAPAVEEEPEEEEGVSGSLQLAWEILEAAAQIFSRQGLSGL  
 PYLAEVQTELANIEFENGILEAAREDYEKALKIHGELPTRNRALAEHYKIGLTYLMQQLNKEGATALR

QSSVLIIEEEIAEIKGKDEPSEDRNMLDLEETKQEILAKIQEIEEMQAQTIAEVRAALDSYIKPMSSGD  
 AAAASSSSSSSANGAASSSSSSSKGAAAASSSTISSSSAKPTDITHLIKRRKKPEDPSSEAEALCSPAKRA  
 AV

>Q9I7K8\_DROME

MVICEIEFCNNSQGIFYAGQLISGQVVIKTEKEKSVKAVILNIKGYAETHWADTEHDPDDQSNGESFNHG  
 VDYLATRAYLHGSSSSIEVLIIEPGTSSYRFACQLPITCPSSFEGTLGRIRYLVNVRVFRPWKFDLNFNRC  
 FTVIKVMDLNSSEMLLRVPSQVESQRTFCCFCRSSLMLRSLVPSQSGFVPGQIVPVEVMVNSDSGVAVE  
 DITVKLTMVVIYYSQPPSADTNKDRFEMVLKTGGGVSTKCRQQFTFDLKVPTPPTCFNLCSIIQIGYQV  
 EAEARVKGCHGGQSLHMPITIGSVPLTKQLQKEPRTWGEVLPQQQLDAKALILIGSEQNGEALGSPNPWA  
 ADPSIAPPSYAEAKHISPDPHKFSKSKKKSQKRGVKGSRKAETIVFSPLYAVFDLSNQVDEMTLRANE  
 PKTDGGYVNEGVEKSTWL

>Q9I7L0\_DROME

MTVTCEIDFDNPHGTYFGGEVLTGRVTLKLDKMKLVKAITLNTGYAETRWIERVTTNRRRRRRRFTFCGR  
 EDYIASKTFLVGSNLSSQVSIIEAGIHTYNFVCLIPTECPSSFEGSHGRVRYMATVTLVVRPWKFDQSYTRC  
 FTVLKVMDLNFDSPLLRVPAHSETSKTYCCWPCRSDPLALQLTVPQTGFVPGQNVPLSVLVTNDSHIPVE  
 QLLISFVMLVTHSKPPSMPNTTSERLVNTFKGDAVQRNCKKLFSEYIRVPATPPTCFNLCGIIQIAYQ  
 VEVEARVKGCHNNEVVTIPLTIGSVPLAQHVPIQPRGFVQNLVNE LAVEEVATAPNSSSPWSVDASIPP  
 PNYQEAVHMRSTAATRSDDLDDPEPVPNTLSLDGGAYKPLYPVFDIPSPSAPPPTDYTNQYMAERAFVN  
 PAMDVDKDKGTWL

>Q9I7L2\_DROME

MALLEYVDNRGRRELSCGSLINNRYVLTAAHCVIGAVETEVEGHLTTVRLGEYDTSKDVDCIDDICNQPI  
 LQLGIEQATVHPQYDPANKNRIHDIALRLDRPVVLENEYIQPVCLPLVSTRMAINTGELLVVSGWGRITTT  
 ARKSTIKQRLDLPVNDHDYCARFATRNIHLISSQLCVGGEFYRSDCDGDSGGPLMRRGFDQAWYQEGVV  
 SFGNRCGLEWPGVYTRVADYMDWIVETIRP

>E4YGN5\_OIKDI

MVTPTPPRTEPDHMRGGLDTCGPHLRFEPCLFFEAIKIVEVESIKQENSADDESSSPVESAITEEI  
 EQEEFNVDIAEEKRLKNEIEEESDSELELTSPALINEHSEGAQSRCSRSDSDIKSTSENQLKRYKYS  
 HTIADIIPDKTARQDSSSDVEEINSTPPIARFAANSNSWAFQPTASLPSRVTGGLNGLPGVPVAHQVPS  
 PALMEAFQARARQGVASIQSQVSPIGFALRVQQQLQANALFTMLRQQQVVKVSSSFTNYSPLMKSFNHLN  
 HRFAPAGMNRVPPASLQFPPPQTQTRRRPNGQKNDRCEYCGKVFKNNTSNLTVHRRMHTGERPYKCKLCDY  
 ACAQSSKLTRHMKTHGTSREHQHKCDICGVPFVAVFSTLEKHKKEHADQLNERMNGHFMTLPSSSK

>E4YGT7\_OIKDI

MKSRFSIFVLLISSIRANTEIKDELKELLKDSTVVNTLVDILDYKLSKKTEELEKKVTVEKLGKEKIVGN  
 KWKEVNAYSDESCSTLCALYASCIGYNYLDSGKICVIFDSIANTEPDDLNFSGMIRRSYALAKIPSSPND  
 TAPHSSGNSDNYDLKI IKS AVAKHIHVCQKKEFELS KKVKTRDSL GAKIRSLEIDTSKSKCLKGGRPSA  
 CDNFAKKIEERNTDIYNAVLT YVEDQNAIKLIQEGMDTRLTEMGHLLATYQPVTVAQPAQDLIGSVLMQT  
 KEMQNNVRIELESKIERNDAEMRRNQGAISNLRSKIDKLPLAGQTS ENEMSVLNQSQVFLVNLKLRIS

>Q9I7L3\_DROME

MRFAPSLSLKSTRGVHQSDTEVSKIMRSLDVIPDVIHIGPQEFLNVTYHGHLAAHCGKVLQVLRDEPS  
VKWPSAPENYALLMVDVDPVNAITPTHREFLHWMVLNIPGNLLALGDVVRVGYMGATPLKGTGTHRFVFL  
LYKQRDYTKFDFPKLPKHSVKGRSGFETKRFAKKYRFGHPVAGNFFTSQWSPDVPSLIKAI SHNARQVAH  
F

>Q9I7L5\_DROME

MGFDMATRFMDILKLTFKVISFKYEQRKLSTAIYSVIKTKSGPVRGVKRNTIWGGSYFSFEKIPFAKPPV  
GDLRFKAPEAVEPWDQELDCTSPADKPLQTHMFFRKYAGSEDCLYLNVYVKDLQPDKLRPVMVWIYGGGY  
QVGEASRDMYSPDFMMSKDVVIVTVAYRLGALGFLSLDDPQLNVPGNAGLKDQIMALRWVQQNIEAFGGD  
SNNITLFGESAGGASTHFLALSPQTEGLIHKAIVMSGSVLCPWTQPPRNWAYRLAQKLGTYGDNKDKA  
FEFLRSMGGGEIVKATATVLSNDEKHHRILFAFGPVVEPYTTEHTVVAKQPHELMQNSWSHRIPMMFGGT  
SFEGLLFYPEVSRPATLDEVGNCNLLPSDLGLNLDPKLRENYGLQLKKAYFGDEPCNQANMMKFLELC  
SYREFWHPIYRAALNRVRQSSAPTYLYRFDHDSKLCNAIRIVLCGHQMRGVCHGDDLCYIFHSMLSHQSA  
PDSPEHKVITGMVDVWTSFAAHGDPNCESIKSLKFAPIENVTFKCLNIGDQFEVMALPELQKIEPVWNS  
FYAPNKL
