# Supplementary material for: NR-2L: A Two-Level Predictor for Identifying Nuclear Receptor Subfamilies Based on Sequence-Derived Features
Source: PubMed Central journal article supplement (PMC3156231; doi:10.1371/journal.pone.0023505), 2011-08-15
Supplement: pone.0023505.s003.pdf [file pone.0023505.s003.pdf]

**Supporting Information S3.** List of the jackknifing results obtained by **NR-2L** on the 159 NRs and 500 non-NRs in the dataset  $\mathcal{S}$  (cf. Supporting Information S1), and the corresponding observed results as annotated in NucleaRDB or UniProt.

### I. Results of the 1<sup>st</sup> level prediction in identifying NRs or non-NRs

| <b>Protein code</b> | <b>Predicted</b> | <b>Observed</b> |
|---------------------|------------------|-----------------|
| Q6TNS3_BRARE        | NR               | NR              |
| O76246_UCAPU        | NR               | NR              |
| RORA_HUMAN          | NR               | NR              |
| Q9PTN2_BRARE        | NR               | NR              |
| HR3_MANSE           | NR               | NR              |
| Q9UNW4_HUMAN        | NR               | NR              |
| Q86BC1_DROME        | NR               | NR              |
| Q8JJ27_XENLA        | NR               | NR              |
| E75_METEN           | NR               | NR              |
| E78A_DROME          | NR               | NR              |
| Q80ST6_MOUSE        | NR               | NR              |
| RORG_HUMAN          | NR               | NR              |
| O02643_CHOFU        | NR               | NR              |
| Q7ZZY9_PETMA        | NR               | NR              |
| Q9DF24_XENLA        | NR               | NR              |
| Q9DFH3_CHICK        | NR               | NR              |
| Q60Q78_CAEBR        | NR               | NR              |
| NR1I3_RAT           | NR               | NR              |
| Q9XXU7_CAEEI        | NR               | NR              |
| Q6GZ85_HUMAN        | NR               | NR              |
| NHR1_ONCVO          | NR               | NR              |
| HR96_DROME          | NR               | NR              |
| RXRB_HUMAN          | NR               | NR              |
| Q9BMU6_AEDAE        | NR               | NR              |
| Q8MX78_BRAFL        | NR               | NR              |
| Q6GN21_XENLA        | NR               | NR              |
| 7UP2_DROME          | NR               | NR              |
| O76241_UCAPU        | NR               | NR              |
| Q8IPF2_DROME        | NR               | NR              |
| USP_CHOFU           | NR               | NR              |
| Q9U3Y3_AEDAL        | NR               | NR              |
| EAR2_HUMAN          | NR               | NR              |
| Q9NG48_APIME        | NR               | NR              |

|              |    |    |
|--------------|----|----|
| USP_DROME    | NR | NR |
| 045117_CHITE | NR | NR |
| Q8CFY1_MOUSE | NR | NR |
| 097120_SCHMA | NR | NR |
| 096562_TRICY | NR | NR |
| Q6ZMP8_HUMAN | NR | NR |
| 046174_BOMMO | NR | NR |
| 077099_AEDAE | NR | NR |
| Q26622_STRPU | NR | NR |
| Q8ST32_DIRIM | NR | NR |
| Q6PHZ7_HUMAN | NR | NR |
| Q8I748_SUBDO | NR | NR |
| Q8MLA0_DROME | NR | NR |
| Q6POE0_BRARE | NR | NR |
| Q9V7B3_DROME | NR | NR |
| Q9U9R6_SCHMA | NR | NR |
| NR2E3_MOUSE  | NR | NR |
| Q5U3F3_BRARE | NR | NR |
| NHR64_CAEEL  | NR | NR |
| Q7YTB9_SACKO | NR | NR |
| Q8IPT4_DROME | NR | NR |
| TLL_DROME    | NR | NR |
| Q9NCL0_TRICA | NR | NR |
| 096680_DROME | NR | NR |
| P90892_CAEEL | NR | NR |
| ANDR_HUMAN   | NR | NR |
| GCR_RAT      | NR | NR |
| Q6XLI8_CALJA | NR | NR |
| PRGR_CANFA   | NR | NR |
| Q8TDS3_HUMAN | NR | NR |
| Q6QB13_DICLA | NR | NR |
| Q8JJ92_HAPBU | NR | NR |
| GCR_ONCMY    | NR | NR |
| Q8JJ89_HAPBU | NR | NR |
| P70048_XENLA | NR | NR |
| Q5WP02_ONCMY | NR | NR |
| Q8QFV2_CARAU | NR | NR |
| PRGR_CHICK   | NR | NR |
| Q800S7_ACASC | NR | NR |
| 093244_ONCMY | NR | NR |
| Q76LM5_ORYLA | NR | NR |

|              |        |    |
|--------------|--------|----|
| Q9YGV9_ANGJA | NR     | NR |
| Q9DDU9_XENLA | NR     | NR |
| PRGR_RANDY   | NR     | NR |
| Q6RKQ3_ONCMY | NR     | NR |
| Q9IBD5_ANGJA | NR     | NR |
| Q6A4C2_DICLA | NR     | NR |
| Q8QGX5_ANGJA | NR     | NR |
| Q8BG65_MOUSE | NR     | NR |
| ESR1_RAT     | NR     | NR |
| Q9W6F4_HAPBU | NR     | NR |
| Q6R7S4_SALSA | NR     | NR |
| Q7T3U4_9TELE | NR     | NR |
| Q762D6_CONMY | NR     | NR |
| ESR2_MICUN   | NR     | NR |
| Q90WH6_CLAGA | NR     | NR |
| Q90ZE6_SQUAC | NR     | NR |
| ERR1_HUMAN   | NR     | NR |
| ERR2_HUMAN   | NR     | NR |
| Q5XTQ9_BRAFL | NR     | NR |
| Q5XTRO_BRAFL | NR     | NR |
| Q8WS79_DROME | NR     | NR |
| Q6ZMM6_HUMAN | NR     | NR |
| Q98TQ3_ORYLA | NR     | NR |
| O97726_PIG   | NR     | NR |
| Q6INY4_XENLA | NR     | NR |
| HR38_DROME   | non-NR | NR |
| Q9U4L1_AEDAE | NR     | NR |
| NHR6_CAEEL   | NR     | NR |
| Q9QWM1_RAT   | NR     | NR |
| P97782_MOUSE | NR     | NR |
| Q8JH98_CARAU | NR     | NR |
| Q8UV26_CLAGA | NR     | NR |
| Q98ST8_BRARE | NR     | NR |
| Q6W954_EPICO | NR     | NR |
| FTZF1_DROME  | NR     | NR |
| Q9NB03_AEDAE | NR     | NR |
| Q8WSJ3_MANSE | NR     | NR |
| Q9YOD1_METEN | NR     | NR |
| Q9BPL0_SCHMA | NR     | NR |
| FTF1B_DROME  | NR     | NR |
| NR6A1_MOUSE  | NR     | NR |

|              |        |        |
|--------------|--------|--------|
| NR6A1_HUMAN  | NR     | NR     |
| Q66JK1_XENTR | NR     | NR     |
| P70033_XENLA | NR     | NR     |
| Q9PU65_BRARE | NR     | NR     |
| A0A178_CARAU | non-NR | non-NR |
| A0A180_XENLA | non-NR | non-NR |
| A0A181_DANRE | non-NR | non-NR |
| LCE6A_HUMAN  | non-NR | non-NR |
| EYS_DROME    | non-NR | non-NR |
| A0A1G5_9BIVA | non-NR | non-NR |
| A0A4R1_HUMAN | non-NR | non-NR |
| A0A4W4_DANRE | non-NR | non-NR |
| B5DVZ7_DROPS | non-NR | non-NR |
| B5DW00_DROPS | non-NR | non-NR |
| B5DW05_DROPS | non-NR | non-NR |
| B5DW07_DROPS | non-NR | non-NR |
| B5DW09_DROPS | non-NR | non-NR |
| B5DW10_DROPS | non-NR | non-NR |
| B5DW13_DROPS | non-NR | non-NR |
| B5DW14_DROPS | non-NR | non-NR |
| B5DW17_DROPS | non-NR | non-NR |
| B5DW18_DROPS | non-NR | non-NR |
| B5DW19_DROPS | non-NR | non-NR |
| B5DW21_DROPS | non-NR | non-NR |
| B5DW23_DROPS | non-NR | non-NR |
| B5DW25_DROPS | non-NR | non-NR |
| B5DW26_DROPS | non-NR | non-NR |
| B5DW27_DROPS | non-NR | non-NR |
| B5DW28_DROPS | non-NR | non-NR |
| B5DW29_DROPS | non-NR | non-NR |
| B5DW32_DROPS | non-NR | non-NR |
| B5DW33_DROPS | non-NR | non-NR |
| B5DW38_DROPS | non-NR | non-NR |
| B5DW41_DROPS | non-NR | non-NR |
| B5DW42_DROPS | non-NR | non-NR |
| B5DW43_DROPS | non-NR | non-NR |
| B5DW44_DROPS | non-NR | non-NR |
| B5DW45_DROPS | non-NR | non-NR |
| B5DW46_DROPS | non-NR | non-NR |
| B5DW47_DROPS | non-NR | non-NR |
| B5DW48_DROPS | NR     | non-NR |

|              |        |        |
|--------------|--------|--------|
| B5DW50_DROPS | non-NR | non-NR |
| B5DW51_DROPS | non-NR | non-NR |
| B5DW53_DROPS | non-NR | non-NR |
| B5DW54_DROPS | non-NR | non-NR |
| B5DW55_DROPS | non-NR | non-NR |
| B5DW63_DROPS | non-NR | non-NR |
| B5DW64_DROPS | non-NR | non-NR |
| B5DW66_DROPS | non-NR | non-NR |
| B5DW68_DROPS | non-NR | non-NR |
| B5DW70_DROPS | non-NR | non-NR |
| B5DW73_DROPS | non-NR | non-NR |
| B5DW74_DROPS | non-NR | non-NR |
| B5DW75_DROPS | non-NR | non-NR |
| B5DW76_DROPS | non-NR | non-NR |
| E1FMB3_LOALO | non-NR | non-NR |
| E1FMB5_LOALO | non-NR | non-NR |
| E1FMB7_LOALO | non-NR | non-NR |
| E1FMC1_LOALO | non-NR | non-NR |
| E1FMC2_LOALO | non-NR | non-NR |
| E1FMC3_LOALO | non-NR | non-NR |
| E1FMC4_LOALO | non-NR | non-NR |
| E1FMC5_LOALO | non-NR | non-NR |
| E1FMC9_LOALO | non-NR | non-NR |
| E1FMD1_LOALO | non-NR | non-NR |
| E1FMD2_LOALO | non-NR | non-NR |
| E1FMD4_LOALO | NR     | non-NR |
| E1FMD5_LOALO | non-NR | non-NR |
| E1FMD6_LOALO | non-NR | non-NR |
| E1FMD7_LOALO | non-NR | non-NR |
| E1FMD8_LOALO | non-NR | non-NR |
| E1FME3_LOALO | non-NR | non-NR |
| E1FME4_LOALO | non-NR | non-NR |
| E1FME5_LOALO | non-NR | non-NR |
| E1FME8_LOALO | non-NR | non-NR |
| E1FMF1_LOALO | non-NR | non-NR |
| E1FMF2_LOALO | non-NR | non-NR |
| E1FMF3_LOALO | non-NR | non-NR |
| E1FMF4_LOALO | non-NR | non-NR |
| E1FMF5_LOALO | non-NR | non-NR |
| E1FMF7_LOALO | NR     | non-NR |
| E1FMF9_LOALO | non-NR | non-NR |

|              |        |        |
|--------------|--------|--------|
| E1FMG1_LOALO | non-NR | non-NR |
| E1FMG2_LOALO | non-NR | non-NR |
| E1FMG3_LOALO | non-NR | non-NR |
| E1FMG4_LOALO | non-NR | non-NR |
| E1FMG5_LOALO | non-NR | non-NR |
| E1FMH1_LOALO | non-NR | non-NR |
| E1FMH5_LOALO | non-NR | non-NR |
| E1FMH6_LOALO | non-NR | non-NR |
| E1FMH7_LOALO | non-NR | non-NR |
| E1FMI1_LOALO | non-NR | non-NR |
| E1FMI3_LOALO | NR     | non-NR |
| E1FMI5_LOALO | non-NR | non-NR |
| E1FMI9_LOALO | non-NR | non-NR |
| E1FMJ0_LOALO | non-NR | non-NR |
| E1FMJ3_LOALO | non-NR | non-NR |
| E1FMJ5_LOALO | non-NR | non-NR |
| E1FMK6_LOALO | non-NR | non-NR |
| E1FMK9_LOALO | non-NR | non-NR |
| E1FML0_LOALO | non-NR | non-NR |
| E1FML2_LOALO | non-NR | non-NR |
| E1FML9_LOALO | non-NR | non-NR |
| E1FMM1_LOALO | non-NR | non-NR |
| E1FMM4_LOALO | non-NR | non-NR |
| E1FMM7_LOALO | non-NR | non-NR |
| E1FMM9_LOALO | non-NR | non-NR |
| E1FMN0_LOALO | NR     | non-NR |
| E1FMN1_LOALO | non-NR | non-NR |
| E1FMN4_LOALO | non-NR | non-NR |
| E1FMN7_LOALO | non-NR | non-NR |
| E1FMP1_LOALO | non-NR | non-NR |
| E1FMP4_LOALO | non-NR | non-NR |
| E1FMP5_LOALO | non-NR | non-NR |
| E1FMP6_LOALO | non-NR | non-NR |
| E1FMP7_LOALO | non-NR | non-NR |
| E1FMQ0_LOALO | non-NR | non-NR |
| E1FMQ1_LOALO | non-NR | non-NR |
| E1FMQ6_LOALO | non-NR | non-NR |
| E1FMQ8_LOALO | non-NR | non-NR |
| E1FMR0_LOALO | non-NR | non-NR |
| E1FMR2_LOALO | non-NR | non-NR |
| E1FMR8_LOALO | non-NR | non-NR |

|              |        |        |
|--------------|--------|--------|
| E1FMS2_LOALO | non-NR | non-NR |
| E1FMS5_LOALO | non-NR | non-NR |
| E1FMS6_LOALO | non-NR | non-NR |
| E1FMS7_LOALO | non-NR | non-NR |
| E1FMS9_LOALO | non-NR | non-NR |
| E1FMT0_LOALO | non-NR | non-NR |
| E1FMT2_LOALO | non-NR | non-NR |
| E1FMT5_LOALO | non-NR | non-NR |
| E1FMT7_LOALO | non-NR | non-NR |
| E1FMT8_LOALO | non-NR | non-NR |
| E1FMU1_LOALO | non-NR | non-NR |
| E1FMU4_LOALO | non-NR | non-NR |
| E1FMU5_LOALO | non-NR | non-NR |
| E1FMU8_LOALO | non-NR | non-NR |
| E1FMU9_LOALO | non-NR | non-NR |
| E1FMV1_LOALO | non-NR | non-NR |
| E1FMV2_LOALO | non-NR | non-NR |
| E1FMV6_LOALO | non-NR | non-NR |
| E1FMV8_LOALO | non-NR | non-NR |
| E1FMV9_LOALO | non-NR | non-NR |
| E1FMW1_LOALO | non-NR | non-NR |
| E1FMW2_LOALO | non-NR | non-NR |
| E1FMW4_LOALO | non-NR | non-NR |
| E1FMW5_LOALO | non-NR | non-NR |
| E1FMW6_LOALO | non-NR | non-NR |
| E1FMW7_LOALO | non-NR | non-NR |
| E1FMX3_LOALO | non-NR | non-NR |
| E1FMX4_LOALO | non-NR | non-NR |
| E1FMX7_LOALO | non-NR | non-NR |
| E1FMX8_LOALO | non-NR | non-NR |
| E1FMY0_LOALO | non-NR | non-NR |
| E1FMY4_LOALO | non-NR | non-NR |
| E1FMY6_LOALO | non-NR | non-NR |
| E1FMY8_LOALO | non-NR | non-NR |
| E1FMZ2_LOALO | non-NR | non-NR |
| E1FMZ4_LOALO | non-NR | non-NR |
| E1FMZ6_LOALO | non-NR | non-NR |
| CLDZ_DANRE   | non-NR | non-NR |
| CLD7B_DANRE  | non-NR | non-NR |
| CND3_XENLA   | non-NR | non-NR |
| BAG6A_XENLA  | non-NR | non-NR |

|              |        |        |
|--------------|--------|--------|
| Q9YHT5_XENLA | non-NR | non-NR |
| NOGG3_DANRE  | non-NR | non-NR |
| Q9YHV6_TAKRU | non-NR | non-NR |
| Q9YI01_DANRE | non-NR | non-NR |
| Q9YI32_CARAU | non-NR | non-NR |
| TYR03_DANRE  | non-NR | non-NR |
| Q9YI90_XENLA | non-NR | non-NR |
| Q9YIB1_ANGJA | non-NR | non-NR |
| LEG2_CONMY   | non-NR | non-NR |
| SYUG_MOUSE   | non-NR | non-NR |
| CDC7_MOUSE   | non-NR | non-NR |
| WDR46_MOUSE  | non-NR | non-NR |
| CST9_MOUSE   | non-NR | non-NR |
| Q9Z015_MOUSE | non-NR | non-NR |
| ITSN2_MOUSE  | non-NR | non-NR |
| CLD13_MOUSE  | non-NR | non-NR |
| TI17A_MOUSE  | non-NR | non-NR |
| PA21B_MOUSE  | non-NR | non-NR |
| IRS4_MOUSE   | non-NR | non-NR |
| STAU1_MOUSE  | non-NR | non-NR |
| Q9Z117_MOUSE | non-NR | non-NR |
| Q9Z161_RAT   | non-NR | non-NR |
| P2R3A_MOUSE  | non-NR | non-NR |
| Q9Z190_MOUSE | non-NR | non-NR |
| EYA4_MOUSE   | NR     | non-NR |
| ZSC12_MOUSE  | NR     | non-NR |
| DEF3B_RAT    | non-NR | non-NR |
| Q9Z1F3_MOUSE | non-NR | non-NR |
| SAE2_MOUSE   | non-NR | non-NR |
| VPP1_MOUSE   | non-NR | non-NR |
| NEK4_MOUSE   | non-NR | non-NR |
| NDUA7_MOUSE  | non-NR | non-NR |
| KANK3_MOUSE  | non-NR | non-NR |
| BAG6_MOUSE   | non-NR | non-NR |
| GRP1_MOUSE   | non-NR | non-NR |
| SEPT3_MOUSE  | non-NR | non-NR |
| AP3B1_MOUSE  | non-NR | non-NR |
| Q9Z1W6-4     | non-NR | non-NR |
| HNRPC_MOUSE  | non-NR | non-NR |
| Q9Z271_MOUSE | non-NR | non-NR |
| TULP1_MOUSE  | non-NR | non-NR |



|              |        |        |
|--------------|--------|--------|
| PLD1_MOUSE   | non-NR | non-NR |
| Q9Z284_MOUSE | non-NR | non-NR |
| KR121_MOUSE  | non-NR | non-NR |
| RGR_MOUSE    | non-NR | non-NR |
| E2AK3_MOUSE  | non-NR | non-NR |
| ATOH7_MOUSE  | non-NR | non-NR |
| OASL2_MOUSE  | non-NR | non-NR |
| Q9Z2G2_MOUSE | non-NR | non-NR |
| LETM1_MOUSE  | non-NR | non-NR |
| PMM2_MOUSE   | non-NR | non-NR |
| Q9Z2P0_MOUSE | non-NR | non-NR |
| VAMP5_MOUSE  | non-NR | non-NR |
| Q9Z2R2_MOUSE | non-NR | non-NR |
| APOC3_CAVPO  | non-NR | non-NR |
| Q9Z2R8_MOUSE | NR     | non-NR |
| ZN292_MOUSE  | non-NR | non-NR |
| Q9Z2U9_RAT   | non-NR | non-NR |
| Q9Z2V0_MOUSE | non-NR | non-NR |
| HDAC6_MOUSE  | non-NR | non-NR |
| Q9Z2X7_RAT   | non-NR | non-NR |
| CORIN_MOUSE  | non-NR | non-NR |
| Q9Z322_RAT   | NR     | non-NR |
| KCNQ2_MOUSE  | non-NR | non-NR |
| THIO_RICPR   | non-NR | non-NR |
| CSTA_HELPJ   | non-NR | non-NR |
| DHE4_HELPJ   | NR     | non-NR |
| Y944_HELPJ   | non-NR | non-NR |
| SCOB_HELPJ   | non-NR | non-NR |
| Q9ZNT0_ARATH | non-NR | non-NR |
| APC10_ARATH  | non-NR | non-NR |
| VATF_ARATH   | non-NR | non-NR |
| RABD1_ARATH  | non-NR | non-NR |
| Q9ZUX0_ARATH | NR     | non-NR |
| Y1461_ARATH  | non-NR | non-NR |
| PCNA2_ARATH  | non-NR | non-NR |
| NU5M_RHISA   | non-NR | non-NR |
| NU4LM_SQUAC  | non-NR | non-NR |
| NU6M_CANFA   | non-NR | non-NR |
| A3LT2_RAT    | NR     | non-NR |
| A0A504_MOUSE | non-NR | non-NR |
| A0A5F3_MOUSE | non-NR | non-NR |

|              |        |        |
|--------------|--------|--------|
| A0A7V1_PAROL | NR     | non-NR |
| A0A8M4_9CRUS | non-NR | non-NR |
| A0A8M5_9CRUS | non-NR | non-NR |
| A0A9I9_MARSA | non-NR | non-NR |
| A0A9P7_TAKRU | non-NR | non-NR |
| A0A9Q6_9ASCI | non-NR | non-NR |
| A0A9Q7_9ASCI | NR     | non-NR |
| A0A9Q9_9ASCI | non-NR | non-NR |
| A0A9R0_9ASCI | non-NR | non-NR |
| A0A9R2_9ASCI | non-NR | non-NR |
| A0A9R3_9ASCI | non-NR | non-NR |
| A0A9R4_9ASCI | non-NR | non-NR |
| A0A9S0_CAEEL | non-NR | non-NR |
| A0A9S1_CAEEL | non-NR | non-NR |
| A0A9S2_CAEEL | non-NR | non-NR |
| A0A9S4_CAEEL | non-NR | non-NR |
| A0A9S5_CAEEL | non-NR | non-NR |
| A0A9S6_CAEEL | NR     | non-NR |
| A0A9S7_CAEEL | non-NR | non-NR |
| A0AAB8_CAEEL | non-NR | non-NR |
| A0AAB9_CAEEL | non-NR | non-NR |
| A0AAC0_CAEEL | non-NR | non-NR |
| A0AAC1_CAEEL | non-NR | non-NR |
| BR2GC_RANGU  | non-NR | non-NR |
| AOAMI7_DROME | non-NR | non-NR |
| AOAMQ8_DROME | NR     | non-NR |
| AOAMT9_DROME | non-NR | non-NR |
| AOAMX2_DROME | NR     | non-NR |
| AOAN03_DROME | NR     | non-NR |
| AOAN67_DROME | non-NR | non-NR |
| AOANA1_DROME | non-NR | non-NR |
| AOANB3_DROME | non-NR | non-NR |
| AOANE1_DROME | non-NR | non-NR |
| AOANM3_DROME | non-NR | non-NR |
| AOANU3_DROME | NR     | non-NR |
| AOAP24_DROME | non-NR | non-NR |
| AOAP42_DROME | non-NR | non-NR |
| AOAPF4_DROME | non-NR | non-NR |
| AOAPM6_DROME | non-NR | non-NR |
| AOAPN6_DROME | non-NR | non-NR |
| AOAPP3_DROME | non-NR | non-NR |

|              |        |        |
|--------------|--------|--------|
| A0APQ1_DROME | non-NR | non-NR |
| A0APW6_DROME | non-NR | non-NR |
| A0APX3_DROME | non-NR | non-NR |
| A0AQ14_DROME | non-NR | non-NR |
| A0AQ96_DROME | non-NR | non-NR |
| A0AQD3_DROME | non-NR | non-NR |
| A0AQD7_DROME | non-NR | non-NR |
| A0AQL9_TRISP | NR     | non-NR |
| A0AR24_HUMAN | non-NR | non-NR |
| A0AR27_HUMAN | NR     | non-NR |
| A0AUH1_HUMAN | NR     | non-NR |
| A0AUJ2_HUMAN | non-NR | non-NR |
| A0AUP8_DANRE | non-NR | non-NR |
| A0AUQ0_DANRE | non-NR | non-NR |
| A0AUR7_DANRE | non-NR | non-NR |
| SMKY_MOUSE   | NR     | non-NR |
| CB067_HUMAN  | non-NR | non-NR |
| S12A8_HUMAN  | non-NR | non-NR |
| A0AV37_HUMAN | non-NR | non-NR |
| RBM47_HUMAN  | NR     | non-NR |
| TTC26_HUMAN  | non-NR | non-NR |
| A0AVG2_HUMAN | non-NR | non-NR |
| FR1L5_HUMAN  | non-NR | non-NR |
| TM129_HUMAN  | NR     | non-NR |
| E2F8_HUMAN   | non-NR | non-NR |
| UBA6_HUMAN   | non-NR | non-NR |
| A0AVV0_DROME | non-NR | non-NR |
| A0AVX5_DROME | NR     | non-NR |
| A0AYH9_BURCH | NR     | non-NR |
| A0B2G5_BURCH | non-NR | non-NR |
| RL72_PARTE   | non-NR | non-NR |
| A0BJ67_PARTE | non-NR | non-NR |
| A0BST8_PARTE | NR     | non-NR |
| A0BUY5_PARTE | non-NR | non-NR |
| A0C2K3_PARTE | non-NR | non-NR |
| PPX4_PARTE   | non-NR | non-NR |
| A0CFU8_PARTE | non-NR | non-NR |
| A0CP12_PARTE | non-NR | non-NR |
| A0CPX7_PARTE | non-NR | non-NR |
| A0CT56_PARTE | non-NR | non-NR |
| A0CZW3_PARTE | non-NR | non-NR |

|              |        |        |
|--------------|--------|--------|
| AOCZY2_PARTE | non-NR | non-NR |
| AOD7E8_PARTE | non-NR | non-NR |
| AODCA3_PARTE | non-NR | non-NR |
| AODHD2_PARTE | non-NR | non-NR |
| AODJ92_PARTE | non-NR | non-NR |
| AODLP9_PARTE | non-NR | non-NR |
| AODLR9_PARTE | NR     | non-NR |
| AODMR3_PARTE | non-NR | non-NR |
| AODPG3_PARTE | non-NR | non-NR |
| AODVJ0_PARTE | non-NR | non-NR |
| AODVQ0_PARTE | non-NR | non-NR |
| AODX60_PARTE | non-NR | non-NR |
| AODZ45_PARTE | non-NR | non-NR |
| AOE3C0_PARTE | non-NR | non-NR |
| AOE9R7_PARTE | non-NR | non-NR |
| AOEAD3_PARTE | non-NR | non-NR |
| AOECE3_PARTE | non-NR | non-NR |
| AOELU3_9BIVA | NR     | non-NR |
| AOEM56_BOMMO | non-NR | non-NR |
| AOEM58_APIME | non-NR | non-NR |
| AOEM59_APIME | non-NR | non-NR |
| AOEXG3_MOUSE | non-NR | non-NR |
| AOEYL8_NEMVE | NR     | non-NR |
| AOEYM1_NEMVE | NR     | non-NR |
| AOEYM2_9BIVA | non-NR | non-NR |
| AOEYM5_XENBC | non-NR | non-NR |
| AOEYM6_XENBC | non-NR | non-NR |
| AOEYM9_XENBC | non-NR | non-NR |
| AOEYN0_XENBC | non-NR | non-NR |
| AOEYN1_XENBC | non-NR | non-NR |
| AOEYN3_XENBC | non-NR | non-NR |
| AOEYN5_XENBC | non-NR | non-NR |
| AOEZR6_AEDAE | non-NR | non-NR |
| AOEZR7_AEDAE | non-NR | non-NR |
| AOEZR9_AEDAE | non-NR | non-NR |
| AOEVS2_AEDAE | non-NR | non-NR |
| AOEVS5_PSEMX | non-NR | non-NR |
| AOF019_PSEMX | non-NR | non-NR |
| AOF0C2_MESMA | non-NR | non-NR |
| AOFDP3_SACKO | NR     | non-NR |
| AOFDP4_SACKO | non-NR | non-NR |

|              |        |        |
|--------------|--------|--------|
| AOFDP5_SACKO | non-NR | non-NR |
| AOFDP6_SACKO | non-NR | non-NR |
| AOFDP8_SACKO | non-NR | non-NR |
| AOFDP9_BOMMO | non-NR | non-NR |
| AOFDQ1_BOMMO | non-NR | non-NR |
| AOFDQ4_BOMMO | non-NR | non-NR |
| AOFDQ8_BOMMO | non-NR | non-NR |
| AOFDR0_BOMMO | non-NR | non-NR |
| AOFDR2_BOMMO | non-NR | non-NR |
| AOFDR3_BOMMO | NR     | non-NR |
| AOFGRO_XENLA | NR     | non-NR |
| ESYT2_HUMAN  | non-NR | non-NR |
| ESYT3_HUMAN  | non-NR | non-NR |
| AOFH50_DANRE | non-NR | non-NR |
| AOFIK6_HUMAN | non-NR | non-NR |
| AOFIU8_9DIPT | non-NR | non-NR |
| AOFIU9_9DIPT | non-NR | non-NR |
| AOFIV0_9DIPT | non-NR | non-NR |
| AOFIV1_9DIPT | non-NR | non-NR |
| AOFIV2_9DIPT | non-NR | non-NR |
| AOFIV3_9DIPT | non-NR | non-NR |
| AOFIV4_9DIPT | non-NR | non-NR |
| AOFIV5_9DIPT | non-NR | non-NR |
| AOFIV6_9DIPT | non-NR | non-NR |
| AOFJI1_DANRE | non-NR | non-NR |
| AOFJI2_DANRE | non-NR | non-NR |
| AOFJI3_DANRE | non-NR | non-NR |
| AOFK01_XENLA | NR     | non-NR |
| AOFK59_CHICK | NR     | non-NR |
| AOFK72_ARAVE | non-NR | non-NR |
| AOFKC7_CHICK | NR     | non-NR |
| AOFKH2_LEPDE | non-NR | non-NR |
| AOFKN4_HUMAN | non-NR | non-NR |
| VMPA_LOXIN   | non-NR | non-NR |
| AOFLQ5_CAEEL | non-NR | non-NR |
| AOFLR2_CAEEL | non-NR | non-NR |
| AOFLR4_CAEEL | non-NR | non-NR |
| AOFLR5_CAEEL | non-NR | non-NR |
| AOFLR6_CAEEL | NR     | non-NR |
| AOFLR8_CAEEL | non-NR | non-NR |
| AOFLS3_CAEEL | non-NR | non-NR |

|              |        |        |
|--------------|--------|--------|
| A0FLS4_CAEL  | non-NR | non-NR |
| A0JCK6_PLUXY | non-NR | non-NR |
| A0JCS2_9HYME | non-NR | non-NR |
| A0JCS3_9HYME | non-NR | non-NR |
| A0JCS4_9HYME | NR     | non-NR |
| A0JCS6_9HYME | non-NR | non-NR |
| A0JCS8_9HYME | non-NR | non-NR |
| A0JCS9_9HYME | non-NR | non-NR |
| A0JCT0_9HYME | non-NR | non-NR |
| A0JCT1_9HYME | non-NR | non-NR |
| A0JCT2_9HYME | non-NR | non-NR |
| A0JCT4_9HYME | non-NR | non-NR |
| A0JCT5_9HYME | non-NR | non-NR |
| A0JCT6_9HYME | non-NR | non-NR |
| A0JCT8_9HYME | non-NR | non-NR |
| A0JCU0_9HYME | non-NR | non-NR |
| A0JCU1_9HYME | non-NR | non-NR |
| A0JCU3_9HYME | non-NR | non-NR |
| A0JCU4_9HYME | non-NR | non-NR |
| A0JCU5_9HYME | non-NR | non-NR |
| A0JCU6_9HYME | non-NR | non-NR |
| A0JCU7_9HYME | non-NR | non-NR |
| A0JCU8_9HYME | non-NR | non-NR |
| A0JCV1_9HYME | non-NR | non-NR |
| A0JCV4_9HYME | non-NR | non-NR |
| A0JCV5_9HYME | non-NR | non-NR |
| A0JCV6_9HYME | non-NR | non-NR |
| A0JCV7_9HYME | non-NR | non-NR |
| A0JCV8_9HYME | non-NR | non-NR |
| A0JCV9_9HYME | non-NR | non-NR |
| A0JCW0_9HYME | non-NR | non-NR |
| A0JCW1_9HYME | non-NR | non-NR |
| A0JCW3_9HYME | non-NR | non-NR |
| A0JCW4_9HYME | non-NR | non-NR |
| A0JCW5_9HYME | NR     | non-NR |
| A0JCW9_9HYME | non-NR | non-NR |
| A0JCX0_9HYME | non-NR | non-NR |
| A0JCX2_9HYME | non-NR | non-NR |
| A0JCX7_9HYME | non-NR | non-NR |
| A0JCX9_9HYME | non-NR | non-NR |
| A0JCY2_9HYME | non-NR | non-NR |

|              |        |        |
|--------------|--------|--------|
| A0JCY4_9HYME | NR     | non-NR |
| A0JCY5_9HYME | non-NR | non-NR |
| A0JCY6_9HYME | non-NR | non-NR |
| A0JCY7_9HYME | non-NR | non-NR |
| A0JCZ0_9HYME | non-NR | non-NR |
| A0JCZ2_9HYME | non-NR | non-NR |
| A0JGX7_TAKRU | non-NR | non-NR |
| A0JGZ6_TETNG | non-NR | non-NR |
| A0JI74_SCHMA | NR     | non-NR |
| A0JI76_SCHMA | non-NR | non-NR |
| A0JL26_DANRE | non-NR | non-NR |
| A0JLZ8_XENTR | non-NR | non-NR |
| K0284_XENTR  | non-NR | non-NR |
| C2CD3_XENTR  | non-NR | non-NR |
| A0JM29_XENTR | non-NR | non-NR |
| A0JM54_XENTR | non-NR | non-NR |
| UIMC1_XENTR  | NR     | non-NR |
| CA174_XENTR  | non-NR | non-NR |
| TDRD5_XENTR  | non-NR | non-NR |
| A0JMB8_DANRE | non-NR | non-NR |
| A0JMC6_DANRE | non-NR | non-NR |
| A0JMC9_DANRE | non-NR | non-NR |
| K0664_DANRE  | non-NR | non-NR |
| LST2_DANRE   | non-NR | non-NR |
| A0JMD3_DANRE | non-NR | non-NR |
| A0JMD5_DANRE | non-NR | non-NR |
| A0JMD6_DANRE | non-NR | non-NR |
| A0JMD7_DANRE | non-NR | non-NR |
| A0JMD8_DANRE | non-NR | non-NR |
| A0JME7_DANRE | non-NR | non-NR |
| CTC1_DANRE   | non-NR | non-NR |
| A0JMF2_DANRE | non-NR | non-NR |
| A0JMF5_DANRE | non-NR | non-NR |
| HAUS6_DANRE  | non-NR | non-NR |
| A0JMG0_DANRE | non-NR | non-NR |
| A0JMG4_DANRE | non-NR | non-NR |
| A0JMH5_DANRE | NR     | non-NR |
| A0JMI1_DANRE | non-NR | non-NR |
| RRF2M_DANRE  | non-NR | non-NR |
| A0JMK6_DANRE | non-NR | non-NR |
| BICR2_DANRE  | non-NR | non-NR |

|              |        |        |
|--------------|--------|--------|
| CAF1A_DANRE  | non-NR | non-NR |
| A0JML0_DANRE | non-NR | non-NR |
| A0JML6_DANRE | non-NR | non-NR |
| DALD3_DANRE  | non-NR | non-NR |
| A0JMM0_DANRE | NR     | non-NR |
| A0JMM2_DANRE | non-NR | non-NR |
| A0JMM5_DANRE | non-NR | non-NR |
| A0JMM6_DANRE | non-NR | non-NR |
| A0JMM7_DANRE | non-NR | non-NR |
| A2LDC_DANRE  | non-NR | non-NR |
| ATHL1_DANRE  | non-NR | non-NR |
| A0JMP5_DANRE | non-NR | non-NR |

## II. Results of the 2<sup>nd</sup> level prediction in identifying the subfamilies of NRs

| <b>Protein code</b> | <b>Predicted</b> | <b>Observed</b> |
|---------------------|------------------|-----------------|
| THB2_RAT            | NR1              | NR1             |
| Q64895_9RETR        | NR3              | NR1             |
| Q5RZV7_PSEAM        | NR1              | NR1             |
| RRG_NOTVI           | NR1              | NR1             |
| Q15156_HUMAN        | NR3              | NR1             |
| Q86WD1_HUMAN        | NR1              | NR1             |
| Q658K5_HUMAN        | NR4              | NR1             |
| NR1D2_HUMAN         | NR1              | NR1             |
| Q6IBU6_HUMAN        | NR1              | NR1             |
| Q922A5_MOUSE        | NR1              | NR1             |
| Q6VA69_AEDAE        | NR1              | NR1             |
| Q6PAY0_XENLA        | NR1              | NR1             |
| NR1H3_HUMAN         | NR1              | NR1             |
| Q9PW01_PLEPL        | NR1              | NR1             |
| Q9GPH1_CALVI        | NR1              | NR1             |
| O97095_LOCF1        | NR1              | NR1             |
| Q7T030_PLEPL        | NR1              | NR1             |
| ECR_DROME           | NR1              | NR1             |
| Q90WP6_SALSA        | NR1              | NR1             |
| Q6GMI3_BRARE        | NR1              | NR1             |
| Q8WSA1_BOMMO        | NR1              | NR1             |
| Q7T031_PLEPL        | NR1              | NR1             |
| O44338_9ACAR        | NR1              | NR1             |
| NR1H4_MOUSE         | NR1              | NR1             |
| E75C_DROME          | NR4              | NR1             |



|              |     |     |
|--------------|-----|-----|
| Q6GND0_XENLA | NR1 | NR1 |
| ECR_BOMMO    | NR1 | NR1 |
| Q8MX80_BRAFL | NR1 | NR1 |
| Q6TNS3_BRARE | NR1 | NR1 |
| O76246_UCAPU | NR1 | NR1 |
| RORA_HUMAN   | NR1 | NR1 |
| Q9PTN2_BRARE | NR1 | NR1 |
| HR3_MANSE    | NR1 | NR1 |
| Q9UNW4_HUMAN | NR1 | NR1 |
| Q86BC1_DROME | NR1 | NR1 |
| Q8JJ27_XENLA | NR1 | NR1 |
| E75_METEN    | NR1 | NR1 |
| E78A_DROME   | NR3 | NR1 |
| Q80ST6_MOUSE | NR1 | NR1 |
| RORG_HUMAN   | NR1 | NR1 |
| O02643_CHOFU | NR1 | NR1 |
| Q7ZZY9_PETMA | NR1 | NR1 |
| Q9DF24_XENLA | NR1 | NR1 |
| Q9DFH3_CHICK | NR1 | NR1 |
| Q60Q78_CAEBR | NR1 | NR1 |
| NR1I3_RAT    | NR1 | NR1 |
| Q9XXU7_CAEEL | NR1 | NR1 |
| Q6GZ85_HUMAN | NR1 | NR1 |
| NHR1_ONCVO   | NR2 | NR1 |
| HR96_DROME   | NR3 | NR1 |
| RXRB_HUMAN   | NR2 | NR2 |
| Q9BMU6_AEDAE | NR2 | NR2 |
| Q8MX78_BRAFL | NR2 | NR2 |
| Q6GN21_XENLA | NR2 | NR2 |
| 7UP2_DROME   | NR2 | NR2 |
| O76241_UCAPU | NR2 | NR2 |
| Q8IPF2_DROME | NR5 | NR2 |
| USP_CHOFU    | NR2 | NR2 |
| Q9U3Y3_AEDAL | NR2 | NR2 |
| EAR2_HUMAN   | NR2 | NR2 |
| Q9NG48_APIME | NR2 | NR2 |
| USP_DROME    | NR2 | NR2 |
| O45117_CHITE | NR2 | NR2 |
| Q8CFY1_MOUSE | NR2 | NR2 |
| O97120_SCHMA | NR3 | NR2 |
| O96562_TRICY | NR2 | NR2 |

|              |     |     |
|--------------|-----|-----|
| Q6ZMP8_HUMAN | NR2 | NR2 |
| O46174_BOMMO | NR2 | NR2 |
| O77099_AEDAE | NR2 | NR2 |
| Q26622_STRPU | NR2 | NR2 |
| Q8ST32_DIRIM | NR2 | NR2 |
| Q6PHZ7_HUMAN | NR2 | NR2 |
| Q8I748_SUBDO | NR4 | NR2 |
| Q8MLA0_DROME | NR2 | NR2 |
| Q6P0E0_BRARE | NR2 | NR2 |
| Q9V7B3_DROME | NR2 | NR2 |
| Q9U9R6_SCHMA | NR2 | NR2 |
| NR2E3_MOUSE  | NR2 | NR2 |
| Q5U3F3_BRARE | NR2 | NR2 |
| NHR64_CAEEL  | NR2 | NR2 |
| Q7YTB9_SACKO | NR2 | NR2 |
| Q8IPT4_DROME | NR3 | NR2 |
| TLL_DROME    | NR2 | NR2 |
| Q9NCL0_TRICA | NR2 | NR2 |
| O96680_DROME | NR4 | NR2 |
| P90892_CAEEL | NR2 | NR2 |
| ANDR_HUMAN   | NR3 | NR3 |
| GCR_RAT      | NR3 | NR3 |
| Q6XLI8_CALJA | NR3 | NR3 |
| PRGR_CANFA   | NR3 | NR3 |
| Q8TDS3_HUMAN | NR3 | NR3 |
| Q6QB13_DICLA | NR3 | NR3 |
| Q8JJ92_HAPBU | NR3 | NR3 |
| GCR_ONCMY    | NR3 | NR3 |
| Q8JJ89_HAPBU | NR3 | NR3 |
| P70048_XENLA | NR3 | NR3 |
| Q5WP02_ONCMY | NR3 | NR3 |
| Q8QFV2_CARAU | NR3 | NR3 |
| PRGR_CHICK   | NR3 | NR3 |
| Q800S7_ACASC | NR3 | NR3 |
| O93244_ONCMY | NR3 | NR3 |
| Q76LM5_ORYLA | NR3 | NR3 |
| Q9YGV9_ANGJA | NR3 | NR3 |
| Q9DDU9_XENLA | NR3 | NR3 |
| PRGR_RANDY   | NR3 | NR3 |
| Q6RKQ3_ONCMY | NR3 | NR3 |
| Q9IBD5_ANGJA | NR3 | NR3 |

|              |     |     |
|--------------|-----|-----|
| Q6A4C2_DICLA | NR3 | NR3 |
| Q8QGX5_ANGJA | NR3 | NR3 |
| Q8BG65_MOUSE | NR3 | NR3 |
| ESR1_RAT     | NR3 | NR3 |
| Q9W6F4_HAPBU | NR3 | NR3 |
| Q6R7S4_SALSA | NR3 | NR3 |
| Q7T3U4_9TELE | NR3 | NR3 |
| Q762D6_CONMY | NR3 | NR3 |
| ESR2_MICUN   | NR3 | NR3 |
| Q90WH6_CLAGA | NR3 | NR3 |
| Q90ZE6_SQUAC | NR3 | NR3 |
| ERR1_HUMAN   | NR3 | NR3 |
| ERR2_HUMAN   | NR3 | NR3 |
| Q5XTQ9_BRAFL | NR3 | NR3 |
| Q5XTR0_BRAFL | NR3 | NR3 |
| Q8WS79_DROME | NR3 | NR3 |
| Q6ZMM6_HUMAN | NR4 | NR4 |
| Q98TQ3_ORYLA | NR4 | NR4 |
| O97726_PIG   | NR4 | NR4 |
| Q6INY4_XENLA | NR4 | NR4 |
| HR38_DROME   | NR1 | NR4 |
| Q9U4L1_AEDAE | NR4 | NR4 |
| NHR6_CAEEL   | NR4 | NR4 |
| Q9QWM1_RAT   | NR5 | NR5 |
| P97782_MOUSE | NR5 | NR5 |
| Q8JH98_CARAU | NR5 | NR5 |
| Q8UV26_CLAGA | NR5 | NR5 |
| Q98ST8_BRARE | NR5 | NR5 |
| Q6W954_EPICO | NR5 | NR5 |
| FTZF1_DROME  | NR5 | NR5 |
| Q9NB03_AEDAE | NR5 | NR5 |
| Q8WSJ3_MANSE | NR5 | NR5 |
| Q9Y0D1_METEN | NR5 | NR5 |
| Q9BPL0_SCHMA | NR3 | NR5 |
| FTF1B_DROME  | NR3 | NR5 |
| NR6A1_MOUSE  | NR6 | NR6 |
| NR6A1_HUMAN  | NR6 | NR6 |
| Q66JK1_XENTR | NR6 | NR6 |
| P70033_XENLA | NR6 | NR6 |
| Q9PU65_BRARE | NR6 | NR6 |
| KNIR_DROVI   | NR0 | NR0 |

|              |        |     |
|--------------|--------|-----|
| KNIR_DROME   | NR0    | NR0 |
| KNRL_DROME   | NR2    | NR0 |
| TRX_DROVI    | NR0    | NR0 |
| TRX_DROME    | NR0    | NR0 |
| EGON_DROME   | NR0    | NR0 |
| ODR7_CAEEL   | NR2    | NR0 |
| DAX1_MOUSE   | NR3    | NR0 |
| Q8QGS4_RANRU | NR0    | NR0 |
| Q8AY13_ORENI | NR0    | NR0 |
| P97947_RAT   | NR0    | NR0 |
| Q8AUM4_ORENI | NR0    | NR0 |
| KNIR_DROVI   | NR     | NR  |
| KNIR_DROME   | NR     | NR  |
| KNRL_DROME   | NR     | NR  |
| TRX_DROVI    | NR     | NR  |
| TRX_DROME    | NR     | NR  |
| EGON_DROME   | NR     | NR  |
| ODR7_CAEEL   | NR     | NR  |
| DAX1_MOUSE   | NR     | NR  |
| Q8QGS4_RANRU | NR     | NR  |
| Q8AY13_ORENI | NR     | NR  |
| P97947_RAT   | NR     | NR  |
| Q8AUM4_ORENI | NR     | NR  |
| THB2_RAT     | NR     | NR  |
| Q64895_9RETR | non-NR | NR  |
| Q5RZV7_PSEAM | NR     | NR  |
| RRG_NOTVI    | NR     | NR  |
| Q15156_HUMAN | NR     | NR  |
| Q86WD1_HUMAN | NR     | NR  |
| Q658K5_HUMAN | NR     | NR  |
| NR1D2_HUMAN  | NR     | NR  |
| Q6IBU6_HUMAN | NR     | NR  |
| Q922A5_MOUSE | NR     | NR  |
| Q6VA69_AEDAE | NR     | NR  |
| Q6PAY0_XENLA | NR     | NR  |
| NR1H3_HUMAN  | NR     | NR  |
| Q9PW01_PLEPL | NR     | NR  |
| Q9GPH1_CALVI | NR     | NR  |
| O97095_LOCFI | NR     | NR  |
| Q7T030_PLEPL | NR     | NR  |
| ECR_DROME    | NR     | NR  |

|              |        |    |
|--------------|--------|----|
| Q90WP6_SALSA | NR     | NR |
| Q6GMI3_BRARE | NR     | NR |
| Q8WSA1_BOMMO | NR     | NR |
| Q7T031_PLEPL | NR     | NR |
| 044338_9ACAR | NR     | NR |
| NR1H4_MOUSE  | NR     | NR |
| E75C_DROME   | non-NR | NR |
| Q6GND0_XENLA | NR     | NR |
| ECR_BOMMO    | NR     | NR |
| Q8MX80_BRAFL | NR     | NR |
