# Supplementary material for: NR-2L: A Two-Level Predictor for Identifying Nuclear Receptor Subfamilies Based on Sequence-Derived Features
Source: PubMed Central journal article supplement (PMC3156231; doi:10.1371/journal.pone.0023505), 2011-08-15
Supplement: pone.0023505.s004.pdf [file pone.0023505.s004.pdf]

**Supporting Information S4.** List of the results obtained by **NR-2L** on the 568 NRs and 500 non-NRs in the independent testing dataset  $S_T$  (cf. Supporting Information S2), and the corresponding observed results as annotated in NucleaRDB or UniProt.

**I. Results of the 1<sup>st</sup> level prediction in identifying NRs or non-NRs**

| <b>Protein code</b> | <b>Predicted</b> | <b>Observed</b> |
|---------------------|------------------|-----------------|
| THA_CHICK           | NR               | NR              |
| THA1_SHEEP          | NR               | NR              |
| THB2_MOUSE          | NR               | NR              |
| THB1_HUMAN          | NR               | NR              |
| Q6F3J6_CONMY        | NR               | NR              |
| THB1_RAT            | NR               | NR              |
| THAA_XENLA          | NR               | NR              |
| THB1_MOUSE          | NR               | NR              |
| Q7TOK4_AMBME        | NR               | NR              |
| THAB_XENLA          | NR               | NR              |
| THA_RANCA           | NR               | NR              |
| THA_SALSA           | NR               | NR              |
| THB2_HUMAN          | NR               | NR              |
| Q6F3J5_CONMY        | NR               | NR              |
| THA_HIPHI           | NR               | NR              |
| THA_NECMA           | NR               | NR              |
| THA1_BRARE          | NR               | NR              |
| Q766D2_ORYLA        | NR               | NR              |
| Q5RZV6_PSEAM        | NR               | NR              |
| THAA_PAROL          | NR               | NR              |
| THBB_XENLA          | NR               | NR              |
| THA_HUMAN           | NR               | NR              |
| THA_PIG             | NR               | NR              |
| THA_RAT             | NR               | NR              |
| Q80Y90_MOUSE        | NR               | NR              |
| THA_MOUSE           | NR               | NR              |
| THAB_PAROL          | NR               | NR              |
| Q800D8_SPAAU        | NR               | NR              |
| THB_BRARE           | NR               | NR              |
| THB_PAROL           | NR               | NR              |
| ERBA_AVIER          | NR               | NR              |

|              |    |    |
|--------------|----|----|
| Q6F3J8_CONMY | NR | NR |
| THB_RANCA    | NR | NR |
| Q90Y21_SALSA | NR | NR |
| Q90Y22_SALSA | NR | NR |
| THBA_XENLA   | NR | NR |
| THB_CHICK    | NR | NR |
| THB_CAIMO    | NR | NR |
| Q7TOK3_AMBME | NR | NR |
| Q6Y9T0_NECMA | NR | NR |
| Q766D1_ORYLA | NR | NR |
| P97513_MUSSP | NR | NR |
| RRA_MOUSE    | NR | NR |
| Q6F3J7_CONMY | NR | NR |
| RRA_HUMAN    | NR | NR |
| RRA_CHICK    | NR | NR |
| RRG1_HUMAN   | NR | NR |
| Q91YX2_MOUSE | NR | NR |
| RRG1_MOUSE   | NR | NR |
| Q9I8T3_AMBME | NR | NR |
| RRB_HUMAN    | NR | NR |
| RRB_CHICK    | NR | NR |
| RRG2_HUMAN   | NR | NR |
| RRB_COTJA    | NR | NR |
| RRA_NOTVI    | NR | NR |
| Q8VHB6_MESAU | NR | NR |
| Q5U645_HUMAN | NR | NR |
| RRG2_MOUSE   | NR | NR |
| Q9I8T2_AMBME | NR | NR |
| Q9QWJ1_RAT   | NR | NR |
| Q8VHB8_MESAU | NR | NR |
| Q8VHB7_MESAU | NR | NR |
| RRG_XENLA    | NR | NR |
| PPAT_PIG     | NR | NR |
| Q8HZ56_SHEEP | NR | NR |
| PPAT_BOVIN   | NR | NR |
| PPAT_MACMU   | NR | NR |
| RRA_FUGRU    | NR | NR |
| Q95J17_MACFA | NR | NR |
| Q8MHZ0_MACFA | NR | NR |
| Q95KZ8_MACFA | NR | NR |
| PPAT_HUMAN   | NR | NR |

|              |    |    |
|--------------|----|----|
| RRB_MOUSE    | NR | NR |
| Q866S0_CAPHI | NR | NR |
| Q5RFE5_PONPY | NR | NR |
| PPAT_RABIT   | NR | NR |
| Q92019_XENLA | NR | NR |
| Q8JHU6_ANAPL | NR | NR |
| Q8HXA4_RABIT | NR | NR |
| PPAT_RAT     | NR | NR |
| PPAT_CRIGR   | NR | NR |
| PPAT_MOUSE   | NR | NR |
| Q7ZTI3_BRARE | NR | NR |
| Q90272_BRARE | NR | NR |
| Q91391_BRARE | NR | NR |
| Q90271_BRARE | NR | NR |
| RRG_BRARE    | NR | NR |
| Q9I878_CHICK | NR | NR |
| RRA_XENLA    | NR | NR |
| Q98SF8_XENLA | NR | NR |
| Q6PA31_XENLA | NR | NR |
| NR1D2_MOUSE  | NR | NR |
| Q8C598_MOUSE | NR | NR |
| Q7TNH1_MESAU | NR | NR |
| PPAS_MOUSE   | NR | NR |
| PPAS_HUMAN   | NR | NR |
| Q99ND3_RAT   | NR | NR |
| PPAR_RAT     | NR | NR |
| PPAR_CANFA   | NR | NR |
| NR1D2_RAT    | NR | NR |
| Q6I9S1_HUMAN | NR | NR |
| PPAR_HUMAN   | NR | NR |
| PPAR_MOUSE   | NR | NR |
| Q62879_RAT   | NR | NR |
| Q9I8W4_CHICK | NR | NR |
| NR1H2_HUMAN  | NR | NR |
| PPAT_XENLA   | NR | NR |
| Q8QGC1_9AVES | NR | NR |
| Q9QWIO_RAT   | NR | NR |
| Q866Q2_PIG   | NR | NR |
| Q9I8W3_CHICK | NR | NR |
| Q6P6S7_RAT   | NR | NR |
| Q9N2H4_RABIT | NR | NR |

|              |        |    |
|--------------|--------|----|
| PPAR_PHACI   | NR     | NR |
| Q8BP65_MOUSE | NR     | NR |
| Q90970_CHICK | NR     | NR |
| NR1H3_RAT    | NR     | NR |
| PPAR_CAVPO   | NR     | NR |
| NR1H3_MOUSE  | NR     | NR |
| Q91X41_MOUSE | NR     | NR |
| Q9U3Y4_AEDAL | NR     | NR |
| ECR_LUCCU    | NR     | NR |
| NR1H2_RAT    | NR     | NR |
| PPAR_XENLA   | NR     | NR |
| Q6AXA9_XENLA | NR     | NR |
| Q8IW13_HUMAN | NR     | NR |
| Q5U0N9_HUMAN | NR     | NR |
| NR1D1_HUMAN  | NR     | NR |
| NR1H2_MOUSE  | NR     | NR |
| ECR_AEDAE    | NR     | NR |
| Q8MYA6_9NEOP | NR     | NR |
| Q7T029_PLEPL | NR     | NR |
| Q9W712_PLAFE | NR     | NR |
| Q9VVM9_DROME | NR     | NR |
| Q8MYA7_9NEOP | NR     | NR |
| 076827_CERCA | NR     | NR |
| Q8IQS3_DROME | non-NR | NR |
| E75A_DROME   | non-NR | NR |
| Q9I8F6_SALSA | NR     | NR |
| ECR_MANSE    | NR     | NR |
| RORA_MOUSE   | NR     | NR |
| Q6GMA2_XENLA | NR     | NR |
| 077255_CHOFU | NR     | NR |
| Q6RVD3_PLOIN | NR     | NR |
| Q8JHU1_CHICK | NR     | NR |
| Q5RGZ2_BRARE | NR     | NR |
| 077240_CHOFU | NR     | NR |
| Q8JIT8_SALSA | NR     | NR |
| Q8AXU8_CHICK | NR     | NR |
| 044337_9ACAR | NR     | NR |
| Q68CY8_HUMAN | NR     | NR |
| Q5XI75_RAT   | NR     | NR |
| NR1H4_RAT    | NR     | NR |
| ECR_HELVI    | NR     | NR |

|              |    |    |
|--------------|----|----|
| 044336_9ACAR | NR | NR |
| 002035_TENMO | NR | NR |
| Q8K476_MESAU | NR | NR |
| Q8K473_MESAU | NR | NR |
| Q8K474_MESAU | NR | NR |
| Q8K475_MESAU | NR | NR |
| HR3_GALME    | NR | NR |
| ECR_CHITE    | NR | NR |
| Q9BMC6_HELAM | NR | NR |
| E75_GALME    | NR | NR |
| Q7Z2W0_HUMAN | NR | NR |
| NR1H4_HUMAN  | NR | NR |
| Q8SPF5_RABIT | NR | NR |
| VDR_CHICK    | NR | NR |
| Q8WSA2_BOMMO | NR | NR |
| Q9U5G4_BOMMO | NR | NR |
| E75_CHOFU    | NR | NR |
| E75_MANSE    | NR | NR |
| Q8JHU2_CHICK | NR | NR |
| Q8JJ28_XENLA | NR | NR |
| Q6P7H5_XENLA | NR | NR |
| VDR_COTJA    | NR | NR |
| Q27547_CHOFU | NR | NR |
| NR1D1_RAT    | NR | NR |
| HR3_DROME    | NR | NR |
| Q6DGW7_BRARE | NR | NR |
| Q95P94_BOMMO | NR | NR |
| PXR_HUMAN    | NR | NR |
| Q811X2_MOUSE | NR | NR |
| VDR_SAGOE    | NR | NR |
| E75B_DROME   | NR | NR |
| Q8IQS2_DROME | NR | NR |
| VDR_HUMAN    | NR | NR |
| Q9I8F7_SALSA | NR | NR |
| Q8SQ01_MACMU | NR | NR |
| Q9IB74_PAROL | NR | NR |
| VDR_RAT      | NR | NR |
| VDR_BOVIN    | NR | NR |
| Q922X0_MOUSE | NR | NR |
| VDR_MOUSE    | NR | NR |
| PXR_RAT      | NR | NR |

|              |    |    |
|--------------|----|----|
| Q5RAP4_PONPY | NR | NR |
| PPAS_XENLA   | NR | NR |
| Q9IB73_PAROL | NR | NR |
| Q62702_RAT   | NR | NR |
| PXR_MOUSE    | NR | NR |
| RORG_MOUSE   | NR | NR |
| Q9NH86_AEDAE | NR | NR |
| VDR_XENLA    | NR | NR |
| Q98934_CHICK | NR | NR |
| RORB_MOUSE   | NR | NR |
| RORB_RAT     | NR | NR |
| RORB_HUMAN   | NR | NR |
| Q7ZU39_BRARE | NR | NR |
| Q91839_XENLA | NR | NR |
| Q8AVZ2_XENLA | NR | NR |
| Q9TU02_RABIT | NR | NR |
| Q9U5G3_BOMMO | NR | NR |
| NHR23_CAEEL  | NR | NR |
| Q6Q2C9_PLOIN | NR | NR |
| Q8SXA4_DROME | NR | NR |
| Q5REL4_PONPY | NR | NR |
| Q5R8V3_PONPY | NR | NR |
| NR1I3_MOUSE  | NR | NR |
| Q811W9_MOUSE | NR | NR |
| NR1I3_HUMAN  | NR | NR |
| NR1I3_MACMU  | NR | NR |
| CNR14_CAEEL  | NR | NR |
| Q9U3F1_CAEEL | NR | NR |
| NR1I3_PHOSI  | NR | NR |
| NR1I3_CALUR  | NR | NR |
| Q811X1_MOUSE | NR | NR |
| Q811X0_MOUSE | NR | NR |
| Q6GZ84_HUMAN | NR | NR |
| Q6GZ68_HUMAN | NR | NR |
| Q8IQS1_DROME | NR | NR |
| Q76FN2_RAT   | NR | NR |
| RXRA_RAT     | NR | NR |
| RXRA_MOUSE   | NR | NR |
| RXRA_HUMAN   | NR | NR |
| Q5TJF7_CANFA | NR | NR |
| RXRB_MOUSE   | NR | NR |

|              |    |    |
|--------------|----|----|
| Q6LC96_MOUSE | NR | NR |
| Q6MGB3_RAT   | NR | NR |
| RXRG_MOUSE   | NR | NR |
| RXRG_HUMAN   | NR | NR |
| Q5REL6_PONPY | NR | NR |
| RXRA_XENLA   | NR | NR |
| 7UP1_DROME   | NR | NR |
| RXRG_CHICK   | NR | NR |
| RXRB_BRARE   | NR | NR |
| Q6INZO_XENLA | NR | NR |
| Q91613_XENLA | NR | NR |
| RXRA_BRARE   | NR | NR |
| Q86GV5_BRAFL | NR | NR |
| COT1_MOUSE   | NR | NR |
| COT1_HUMAN   | NR | NR |
| COT1_BOVIN   | NR | NR |
| Q62681_RAT   | NR | NR |
| Q6DHP9_BRARE | NR | NR |
| COT2_BOVIN   | NR | NR |
| COT2_HUMAN   | NR | NR |
| COT2_MOUSE   | NR | NR |
| COT2_RAT     | NR | NR |
| NR2F1_BRARE  | NR | NR |
| Q91430_BRARE | NR | NR |
| Q6PHF2_BRARE | NR | NR |
| Q9W745_XENLA | NR | NR |
| Q91840_XENLA | NR | NR |
| Q8T5C6_BIOGL | NR | NR |
| COT2_CHICK   | NR | NR |
| Q6DCH6_XENLA | NR | NR |
| Q8VCRO_MOUSE | NR | NR |
| Q7ZXI7_XENLA | NR | NR |
| Q9PS79_9PIPI | NR | NR |
| Q8UUM6_ORYLA | NR | NR |
| RXRD_BRARE   | NR | NR |
| Q66TQ0_9CAEN | NR | NR |
| Q6V7U7_LOCFI | NR | NR |
| Q66J63_XENLA | NR | NR |
| Q91720_XENLA | NR | NR |
| Q5RCZ5_PONPY | NR | NR |
| Q95K90_MACFA | NR | NR |

|              |    |    |
|--------------|----|----|
| RXRG_BRARE   | NR | NR |
| Q15625_HUMAN | NR | NR |
| Q9VLI7_DROME | NR | NR |
| NR2F5_BRARE  | NR | NR |
| Q9GSG8_AEDAE | NR | NR |
| USP_MANSE    | NR | NR |
| Q6PH18_BRARE | NR | NR |
| TR4_HUMAN    | NR | NR |
| TR4_MOUSE    | NR | NR |
| Q6POE6_BRARE | NR | NR |
| TR4_RAT      | NR | NR |
| Q9GSG7_AEDAE | NR | NR |
| Q9U7D9_LOCFI | NR | NR |
| USP_BOMMO    | NR | NR |
| Q8VIJ3_MOUSE | NR | NR |
| Q8VIJ4_RAT   | NR | NR |
| HNF4_DROME   | NR | NR |
| Q62152_MOUSE | NR | NR |
| Q6GL59_XENTR | NR | NR |
| Q7T0T7_XENLA | NR | NR |
| Q922G8_MOUSE | NR | NR |
| Q9NFY1_TENMO | NR | NR |
| EAR2_MOUSE   | NR | NR |
| Q6P117_BRARE | NR | NR |
| EAR2_RAT     | NR | NR |
| Q5QPB8_HUMAN | NR | NR |
| Q962I5_LUCCU | NR | NR |
| Q6P115_BRARE | NR | NR |
| O61449_9ACAR | NR | NR |
| O61448_9ACAR | NR | NR |
| HNF4A_MOUSE  | NR | NR |
| HNF4A_RAT    | NR | NR |
| Q6PHH5_BRARE | NR | NR |
| Q9JJI9_TAMSI | NR | NR |
| Q7YRQ5_BOVIN | NR | NR |
| HNF4A_HUMAN  | NR | NR |
| Q5RH32_BRARE | NR | NR |
| Q7SZG3_FUGRU | NR | NR |
| Q8AVK3_XENLA | NR | NR |
| Q5QPB7_HUMAN | NR | NR |
| Q6IVK1_PLOIN | NR | NR |



|              |    |    |
|--------------|----|----|
| Q95WF7_ACRMI | NR | NR |
| Q6LDB2_9MURI | NR | NR |
| Q8AXB6_BRARE | NR | NR |
| Q8I1M8_9NEOP | NR | NR |
| HNF4A_XENLA  | NR | NR |
| Q8JID3_CHICK | NR | NR |
| Q6B4V6_HUMAN | NR | NR |
| Q6B4V7_HUMAN | NR | NR |
| Q6B4V5_HUMAN | NR | NR |
| HNF4B_XENLA  | NR | NR |
| O77100_AEDAE | NR | NR |
| Q7YRQ4_BOVIN | NR | NR |
| TR2_HUMAN    | NR | NR |
| Q15626_HUMAN | NR | NR |
| NR2E3_HUMAN  | NR | NR |
| Q6DEH0_BRARE | NR | NR |
| O46175_BOMMO | NR | NR |
| NR2E1_ORYLA  | NR | NR |
| Q8JHW6_FUGRU | NR | NR |
| Q9Y1J4_SCHMA | NR | NR |
| NR2E1_MOUSE  | NR | NR |
| HNF4G_MOUSE  | NR | NR |
| Q7Z2V9_HUMAN | NR | NR |
| NR2E1_CHICK  | NR | NR |
| NR2E1_HUMAN  | NR | NR |
| HNF4G_HUMAN  | NR | NR |
| Q8MX79_BRAFL | NR | NR |
| Q90WV5_CHICK | NR | NR |
| NR2E1_XENLA  | NR | NR |
| Q9VP28_DROME | NR | NR |
| HR78_DROME   | NR | NR |
| TLL_DROVI    | NR | NR |
| Q9VML1_DROME | NR | NR |
| Q5U7E0_MUSDO | NR | NR |
| Q86PK5_CAEEL | NR | NR |
| Q61WY2_CAEBR | NR | NR |
| Q8IVZ9_HUMAN | NR | NR |
| Q688B5_CAEEL | NR | NR |
| O77101_AEDAE | NR | NR |
| Q86PK4_CAEEL | NR | NR |
| GCR_SAISC    | NR | NR |

|              |    |    |
|--------------|----|----|
| GCR_HUMAN    | NR | NR |
| GCR_SAI BB   | NR | NR |
| GCR_AOTNA    | NR | NR |
| Q6NOA4_HUMAN | NR | NR |
| GCR_SAGOE    | NR | NR |
| Q6XLJ0_CALJA | NR | NR |
| Q5R7M7_PONPY | NR | NR |
| Q5R9P5_PONPY | NR | NR |
| ANDR_PANTR   | NR | NR |
| ANDR_PAPHA   | NR | NR |
| ANDR_MACFA   | NR | NR |
| ANDR_MACMU   | NR | NR |
| Q9UN21_HUMAN | NR | NR |
| Q5S4M0_PIG   | NR | NR |
| GCR_MOUSE    | NR | NR |
| ANDR_EULFC   | NR | NR |
| GCR_TUPGB    | NR | NR |
| ANDR_PIG     | NR | NR |
| GCR_CAVPO    | NR | NR |
| PRGR_HUMAN   | NR | NR |
| ANDR_CANFA   | NR | NR |
| ANDR_CROCR   | NR | NR |
| GCR_RABIT    | NR | NR |
| ANDR_RAT     | NR | NR |
| ANDR_MOUSE   | NR | NR |
| PRGR_RABIT   | NR | NR |
| MCR_SAI SC   | NR | NR |
| Q6XLI9_CALJA | NR | NR |
| MCR_HUMAN    | NR | NR |
| MCR_RAT      | NR | NR |
| MCR_MOUSE    | NR | NR |
| PRGR_RAT     | NR | NR |
| PRGR_MOUSE   | NR | NR |
| MCR_TUPGB    | NR | NR |
| Q13771_HUMAN | NR | NR |
| Q6DDL0_XENLA | NR | NR |
| GCR_XENLA    | NR | NR |
| Q66J29_XENLA | NR | NR |
| Q8NG42_HUMAN | NR | NR |
| GCR_PAROL    | NR | NR |
| Q8JJ91_HAPBU | NR | NR |

|              |    |    |
|--------------|----|----|
| Q8JJ90_HAPBU | NR | NR |
| Q5WP01_ONCMY | NR | NR |
| Q9I8F5_9TELE | NR | NR |
| Q8UWB7_ORENI | NR | NR |
| 093245_ONCMY | NR | NR |
| Q8QFV7_HAPBU | NR | NR |
| 093497_PAGMA | NR | NR |
| ANDR_RANCA   | NR | NR |
| Q66VR6_MICUN | NR | NR |
| Q60I32_GAMAF | NR | NR |
| Q9PWG5_ANGJA | NR | NR |
| Q6IVJ3_DICLA | NR | NR |
| Q8NG44_HUMAN | NR | NR |
| Q801Z1_GASAC | NR | NR |
| Q8NG45_HUMAN | NR | NR |
| Q8NG43_HUMAN | NR | NR |
| ESR1_PIG     | NR | NR |
| Q9DDZ4_MICSA | NR | NR |
| ESR1_BOVIN   | NR | NR |
| ESR1_HUMAN   | NR | NR |
| ESR1_MOUSE   | NR | NR |
| Q7SZI0_FUNHE | NR | NR |
| ESR1_HORSE   | NR | NR |
| ESR2_ONCMY   | NR | NR |
| ESR1_MESAU   | NR | NR |
| ESR1_ORYLA   | NR | NR |
| Q765N7_ALLMI | NR | NR |
| Q8AYH0_COTJA | NR | NR |
| ESR1_CHICK   | NR | NR |
| Q8UWB0_CAICR | NR | NR |
| Q6W5G7_XENLA | NR | NR |
| ESR1_POEGU   | NR | NR |
| Q90WS8_BRARE | NR | NR |
| ESR1_XENLA   | NR | NR |
| ESRB1_CARAU  | NR | NR |
| Q7ZU32_BRARE | NR | NR |
| Q8AV62_BRARE | NR | NR |
| Q60GT9_GAMAF | NR | NR |
| Q8UWA9_CNEUN | NR | NR |
| ESR2_STUVU   | NR | NR |
| ESR2_MOUSE   | NR | NR |

|              |    |    |
|--------------|----|----|
| ESR2_RAT     | NR | NR |
| Q8JJB9_CYPCA | NR | NR |
| ESR2_HUMAN   | NR | NR |
| ESR1_ONCMY   | NR | NR |
| Q8UWB8_ORENI | NR | NR |
| Q98SM7_BRARE | NR | NR |
| ESR2_BOVIN   | NR | NR |
| Q5PR29_BRARE | NR | NR |
| Q6XSH2_MICSA | NR | NR |
| ESR2_PIG     | NR | NR |
| ESR2_SHEEP   | NR | NR |
| Q8QHK9_PAROL | NR | NR |
| Q98SM8_BRARE | NR | NR |
| ESR2_ANGJA   | NR | NR |
| Q90WS9_BRARE | NR | NR |
| ESR2_CALJA   | NR | NR |
| ESR1_PAGMA   | NR | NR |
| Q6H9M5_SPAAU | NR | NR |
| Q804Q6_ACASC | NR | NR |
| Q6H9M4_SPAAU | NR | NR |
| Q7T3U5_9TELE | NR | NR |
| ESRB2_CARAU  | NR | NR |
| ESR1_SPAAU   | NR | NR |
| Q8UW75_ORYLA | NR | NR |
| ESR3_MICUN   | NR | NR |
| Q7T2K7_9LABR | NR | NR |
| Q6XSH1_MICSA | NR | NR |
| Q9DEV4_XENLA | NR | NR |
| ESR2_ORENI   | NR | NR |
| ESR2_SPAAU   | NR | NR |
| Q7T2K8_9LABR | NR | NR |
| Q6TGB3_HAPBU | NR | NR |
| Q800Q2_ZOAVI | NR | NR |
| ESR1_ORENI   | NR | NR |
| Q804Q7_ACASC | NR | NR |
| Q8QHL0_PAROL | NR | NR |
| ESR1 ICTPU   | NR | NR |
| Q6W5G9_XENTR | NR | NR |
| ESR1_OREAU   | NR | NR |
| Q69F36_CARAU | NR | NR |
| Q95MF0_MACAR | NR | NR |

|              |    |    |
|--------------|----|----|
| ESR1_BRARE   | NR | NR |
| Q5XXP1_9TELE | NR | NR |
| ESR2_ICTPU   | NR | NR |
| Q90WV1_CARAU | NR | NR |
| Q95ME9_CALJA | NR | NR |
| Q91Z86_MOUSE | NR | NR |
| ESR2_CHICK   | NR | NR |
| ESR2_COTJA   | NR | NR |
| ERR3_HUMAN   | NR | NR |
| ERR3_MOUSE   | NR | NR |
| ERR1_MOUSE   | NR | NR |
| Q5UKY7_CHICK | NR | NR |
| ERR3_PONPY   | NR | NR |
| Q6W5G5_XENLA | NR | NR |
| Q6W5G6_XENLA | NR | NR |
| ERR2_RAT     | NR | NR |
| Q6Q6F4_BRARE | NR | NR |
| Q8C7A6_MOUSE | NR | NR |
| ERR2_MOUSE   | NR | NR |
| Q8CCV5_MOUSE | NR | NR |
| Q6Q6F6_BRARE | NR | NR |
| Q6QMY5_CANFA | NR | NR |
| Q9VSE9_DROME | NR | NR |
| Q6AX97_XENLA | NR | NR |
| NR4A1_HUMAN  | NR | NR |
| Q6IBU8_HUMAN | NR | NR |
| Q8N3V2_HUMAN | NR | NR |
| Q5RBB0_PONPY | NR | NR |
| NR4A1_CANFA  | NR | NR |
| NR4A1_MOUSE  | NR | NR |
| NR4A2_MOUSE  | NR | NR |
| NR4A2_HUMAN  | NR | NR |
| NR4A2_RAT    | NR | NR |
| Q5R5Y4_PONPY | NR | NR |
| NR4A1_RAT    | NR | NR |
| NR4A3_MOUSE  | NR | NR |
| NR4A3_RAT    | NR | NR |
| Q6NXU0_HUMAN | NR | NR |
| NR4A3_HUMAN  | NR | NR |
| NR4A2_XENLA  | NR | NR |
| Q7TOV3_XENLA | NR | NR |

|              |    |    |
|--------------|----|----|
| Q6DH08_BRARE | NR | NR |
| Q6GMG3_BRARE | NR | NR |
| Q8INU7_DROME | NR | NR |
| Q9R1W4_MOUSE | NR | NR |
| 097727_PIG   | NR | NR |
| Q61JK3_CAEBR | NR | NR |
| NR5A2_HUMAN  | NR | NR |
| Q9UECO_HUMAN | NR | NR |
| Q9QWMO_RAT   | NR | NR |
| NR5A2_MOUSE  | NR | NR |
| NR5A2_CHICK  | NR | NR |
| Q5XGE7_XENTR | NR | NR |
| Q9IB82_RANRU | NR | NR |
| Q91544_XENLA | NR | NR |
| Q90YL6_BRARE | NR | NR |
| Q9GKL1_HORSE | NR | NR |
| 042186_BRARE | NR | NR |
| Q9IB81_RANRU | NR | NR |
| Q9PWI7_CHICK | NR | NR |
| STF1_RAT     | NR | NR |
| Q812G5_MOUSE | NR | NR |
| 042102_CHICK | NR | NR |
| Q90XC4_POEGU | NR | NR |
| STF1_BOVIN   | NR | NR |
| STF1_MOUSE   | NR | NR |
| Q9YI54_TRASC | NR | NR |
| STF1_PIG     | NR | NR |
| STF1_HUMAN   | NR | NR |
| STF1_MACEU   | NR | NR |
| STF1_HORSE   | NR | NR |
| Q9YI95_RANRU | NR | NR |
| Q6QHU4_PLEWA | NR | NR |
| 093258_ORYLA | NR | NR |
| Q7ZT68_ORENI | NR | NR |
| Q800U8_BRARE | NR | NR |
| Q8UV27_CLAGA | NR | NR |
| Q9IAI9_BRARE | NR | NR |
| FTZF1_BOMMO  | NR | NR |
| Q91601_XENLA | NR | NR |
| DAX1_PIG     | NR | NR |
| DAX1_RAT     | NR | NR |

|              |        |        |
|--------------|--------|--------|
| DAX1_HUMAN   | NR     | NR     |
| Q9PTE9_CHICK | NR     | NR     |
| SHP_MOUSE    | NR     | NR     |
| SHP_HUMAN    | NR     | NR     |
| E4YGX1_OIKDI | non-NR | non-NR |
| E4YGY5_OIKDI | non-NR | non-NR |
| Q9I7K4_DROME | NR     | non-NR |
| NASP_DROME   | NR     | non-NR |
| E4YGY7_OIKDI | non-NR | non-NR |
| A8PAW1_BRUMA | non-NR | non-NR |
| E4YGY9_OIKDI | non-NR | non-NR |
| E4YGZ7_OIKDI | non-NR | non-NR |
| E4YGZ9_OIKDI | non-NR | non-NR |
| E4YH01_OIKDI | non-NR | non-NR |
| E4YH05_OIKDI | non-NR | non-NR |
| E4YH09_OIKDI | non-NR | non-NR |
| E4YH11_OIKDI | non-NR | non-NR |
| E4YH03_OIKDI | non-NR | non-NR |
| E4YH14_OIKDI | non-NR | non-NR |
| E4YH19_OIKDI | non-NR | non-NR |
| E4YH20_OIKDI | non-NR | non-NR |
| E4YH22_OIKDI | non-NR | non-NR |
| E4YH28_OIKDI | non-NR | non-NR |
| E4YH30_OIKDI | non-NR | non-NR |
| E4YH32_OIKDI | non-NR | non-NR |
| Q9I7K8_DROME | NR     | non-NR |
| Q9I7L0_DROME | NR     | non-NR |
| E4YH33_OIKDI | non-NR | non-NR |
| E4YH37_OIKDI | non-NR | non-NR |
| E4YH39_OIKDI | non-NR | non-NR |
| E4YH44_OIKDI | non-NR | non-NR |
| E4YH50_OIKDI | non-NR | non-NR |
| E4YH56_OIKDI | non-NR | non-NR |
| E4YH66_OIKDI | non-NR | non-NR |
| E4YH68_OIKDI | non-NR | non-NR |
| E4YH74_OIKDI | non-NR | non-NR |
| E4YH77_OIKDI | non-NR | non-NR |
| E4YH78_OIKDI | non-NR | non-NR |
| E4YH85_OIKDI | non-NR | non-NR |
| E4YH87_OIKDI | non-NR | non-NR |
| E4YH88_OIKDI | non-NR | non-NR |

|              |        |        |
|--------------|--------|--------|
| E4YH89_OIKDI | non-NR | non-NR |
| Q9I7L2_DROME | NR     | non-NR |
| E4YGN5_OIKDI | NR     | non-NR |
| E4YH91_OIKDI | non-NR | non-NR |
| E4YH99_OIKDI | non-NR | non-NR |
| E4YHA2_OIKDI | non-NR | non-NR |
| E4YHA7_OIKDI | non-NR | non-NR |
| E4YHA8_OIKDI | non-NR | non-NR |
| E4YHA9_OIKDI | non-NR | non-NR |
| E4YHB5_OIKDI | non-NR | non-NR |
| E4YHB8_OIKDI | non-NR | non-NR |
| E4YHB9_OIKDI | non-NR | non-NR |
| E4YHC1_OIKDI | non-NR | non-NR |
| E4YHC5_OIKDI | non-NR | non-NR |
| E4YHC8_OIKDI | non-NR | non-NR |
| E4YHD2_OIKDI | non-NR | non-NR |
| E4YHD4_OIKDI | non-NR | non-NR |
| E4YHD5_OIKDI | non-NR | non-NR |
| E4YHE4_OIKDI | non-NR | non-NR |
| E4YHE5_OIKDI | non-NR | non-NR |
| E4YHE8_OIKDI | non-NR | non-NR |
| E4YGT7_OIKDI | NR     | non-NR |
| E4YHG3_OIKDI | non-NR | non-NR |
| E4YHH4_OIKDI | non-NR | non-NR |
| E4YHH5_OIKDI | non-NR | non-NR |
| E4YHI0_OIKDI | non-NR | non-NR |
| E4YHI4_OIKDI | non-NR | non-NR |
| E4YHI7_OIKDI | non-NR | non-NR |
| E4YHI8_OIKDI | non-NR | non-NR |
| E4YHJ2_OIKDI | non-NR | non-NR |
| E4YHJ3_OIKDI | non-NR | non-NR |
| E4YHJ4_OIKDI | non-NR | non-NR |
| E4YHJ5_OIKDI | non-NR | non-NR |
| E4YHJ7_OIKDI | non-NR | non-NR |
| E4YHK3_OIKDI | non-NR | non-NR |
| E4YHK8_OIKDI | non-NR | non-NR |
| E4YHK9_OIKDI | non-NR | non-NR |
| E4YHL0_OIKDI | non-NR | non-NR |
| E4YHL1_OIKDI | non-NR | non-NR |
| E4YHM0_OIKDI | non-NR | non-NR |
| E4YHM6_OIKDI | non-NR | non-NR |



|              |        |        |
|--------------|--------|--------|
| E4YHM8_OIKDI | non-NR | non-NR |
| E4YHN0_OIKDI | non-NR | non-NR |
| E4YHN7_OIKDI | non-NR | non-NR |
| E4YHN8_OIKDI | non-NR | non-NR |
| E4YHN9_OIKDI | non-NR | non-NR |
| E4YHP1_OIKDI | non-NR | non-NR |
| E4YHP4_OIKDI | non-NR | non-NR |
| E4YHQ5_OIKDI | non-NR | non-NR |
| E4YHQ6_OIKDI | non-NR | non-NR |
| E4YHR1_OIKDI | non-NR | non-NR |
| E4YHR6_OIKDI | non-NR | non-NR |
| E4YHR7_OIKDI | non-NR | non-NR |
| E4YHR8_OIKDI | non-NR | non-NR |
| E4YHS5_OIKDI | non-NR | non-NR |
| E4YHS7_OIKDI | non-NR | non-NR |
| E4YHS9_OIKDI | non-NR | non-NR |
| E4YHT0_OIKDI | non-NR | non-NR |
| E4YHT6_OIKDI | non-NR | non-NR |
| E4YHT9_OIKDI | non-NR | non-NR |
| E4YHU7_OIKDI | non-NR | non-NR |
| E4YHU9_OIKDI | non-NR | non-NR |
| E4YHV3_OIKDI | non-NR | non-NR |
| E4YHW4_OIKDI | non-NR | non-NR |
| E4YHW8_OIKDI | non-NR | non-NR |
| E4YHX7_OIKDI | non-NR | non-NR |
| E4YHY0_OIKDI | non-NR | non-NR |
| E4YHY3_OIKDI | non-NR | non-NR |
| E4YHY5_OIKDI | non-NR | non-NR |
| E4YHZ7_OIKDI | non-NR | non-NR |
| E4YHZ8_OIKDI | non-NR | non-NR |
| E4YI01_OIKDI | non-NR | non-NR |
| E4YI03_OIKDI | non-NR | non-NR |
| E4YI10_OIKDI | non-NR | non-NR |
| E4YI12_OIKDI | non-NR | non-NR |
| E4YI21_OIKDI | non-NR | non-NR |
| E4YI25_OIKDI | non-NR | non-NR |
| E4YGV5_OIKDI | non-NR | non-NR |
| E4YGY3_OIKDI | non-NR | non-NR |
| E4YI28_OIKDI | non-NR | non-NR |
| E4YI31_OIKDI | non-NR | non-NR |
| E4YI36_OIKDI | non-NR | non-NR |

|              |        |        |
|--------------|--------|--------|
| E4YI40_OIKDI | non-NR | non-NR |
| E4YI41_OIKDI | non-NR | non-NR |
| E4YI43_OIKDI | non-NR | non-NR |
| E4YI44_OIKDI | non-NR | non-NR |
| E4YI46_OIKDI | non-NR | non-NR |
| E4YI47_OIKDI | non-NR | non-NR |
| E4YI56_OIKDI | non-NR | non-NR |
| E4YI59_OIKDI | non-NR | non-NR |
| E4YI61_OIKDI | non-NR | non-NR |
| E4YI65_OIKDI | non-NR | non-NR |
| E4YI76_OIKDI | non-NR | non-NR |
| E4YI85_OIKDI | non-NR | non-NR |
| E4YH76_OIKDI | non-NR | non-NR |
| E4YH98_OIKDI | non-NR | non-NR |
| E4YI86_OIKDI | non-NR | non-NR |
| E4YI92_OIKDI | non-NR | non-NR |
| E4YI93_OIKDI | non-NR | non-NR |
| E4YI94_OIKDI | non-NR | non-NR |
| E4YI98_OIKDI | non-NR | non-NR |
| E4YI99_OIKDI | non-NR | non-NR |
| E4YIA0_OIKDI | non-NR | non-NR |
| E4YIA3_OIKDI | non-NR | non-NR |
| E4YIA7_OIKDI | non-NR | non-NR |
| E4YIA8_OIKDI | non-NR | non-NR |
| E4YIB1_OIKDI | non-NR | non-NR |
| E4YIB3_OIKDI | non-NR | non-NR |
| E4YIB4_OIKDI | non-NR | non-NR |
| E4YIB8_OIKDI | non-NR | non-NR |
| E4YIC3_OIKDI | non-NR | non-NR |
| E4YID1_OIKDI | non-NR | non-NR |
| E4YID3_OIKDI | non-NR | non-NR |
| E4YID7_OIKDI | non-NR | non-NR |
| E4YIE0_OIKDI | non-NR | non-NR |
| E4YIE1_OIKDI | non-NR | non-NR |
| E4YIE3_OIKDI | non-NR | non-NR |
| E4YIE5_OIKDI | non-NR | non-NR |
| E4YIE8_OIKDI | non-NR | non-NR |
| E4YIE9_OIKDI | non-NR | non-NR |
| E4YIF9_OIKDI | non-NR | non-NR |
| E4YIG2_OIKDI | non-NR | non-NR |
| E4YIG3_OIKDI | non-NR | non-NR |

|              |        |        |
|--------------|--------|--------|
| E4YIG4_OIKDI | non-NR | non-NR |
| E4YIG7_OIKDI | non-NR | non-NR |
| E4YIH3_OIKDI | non-NR | non-NR |
| E4YIH5_OIKDI | non-NR | non-NR |
| E4YIH6_OIKDI | non-NR | non-NR |
| E4YIH9_OIKDI | non-NR | non-NR |
| E4YII0_OIKDI | non-NR | non-NR |
| Q9I7L7_DROME | non-NR | non-NR |
| Q9I7M1_DROME | non-NR | non-NR |
| Q9I7M8_DROME | non-NR | non-NR |
| Q9I7N3_DROME | non-NR | non-NR |
| Q9I7P6_DROME | non-NR | non-NR |
| Q9I7Q5_DROME | non-NR | non-NR |
| Q9I7Q9_DROME | non-NR | non-NR |
| Q9I7R0_DROME | non-NR | non-NR |
| Q9I7R3_DROME | non-NR | non-NR |
| Q9I7S4_DROME | non-NR | non-NR |
| PUR6_DROME   | non-NR | non-NR |
| Q9I7T3_DROME | non-NR | non-NR |
| E4YGN2_OIKDI | non-NR | non-NR |
| Q9I7U1_DROME | non-NR | non-NR |
| TITIN_DROME  | non-NR | non-NR |
| E4YII7_OIKDI | non-NR | non-NR |
| E4YIJ5_OIKDI | non-NR | non-NR |
| JUPIT_DROME  | NR     | non-NR |
| Q9I7K0-3     | NR     | non-NR |
| E4YIJ6_OIKDI | non-NR | non-NR |
| E4YIK1_OIKDI | non-NR | non-NR |
| E4YIK3_OIKDI | non-NR | non-NR |
| E4YIK7_OIKDI | non-NR | non-NR |
| E4YIL1_OIKDI | non-NR | non-NR |
| E4YIL8_OIKDI | non-NR | non-NR |
| E4YIL9_OIKDI | non-NR | non-NR |
| E4YIM2_OIKDI | non-NR | non-NR |
| E4YIM9_OIKDI | non-NR | non-NR |
| E4YIN2_OIKDI | non-NR | non-NR |
| E4YIP1_OIKDI | non-NR | non-NR |
| E4YIP7_OIKDI | non-NR | non-NR |
| E4YIP8_OIKDI | non-NR | non-NR |
| E4YIP9_OIKDI | non-NR | non-NR |
| E4YIQ4_OIKDI | non-NR | non-NR |

|              |        |        |
|--------------|--------|--------|
| E4YIQ7_OIKDI | non-NR | non-NR |
| E4YIQ8_OIKDI | non-NR | non-NR |
| E4YH58_OIKDI | non-NR | non-NR |
| E4YIQ9_OIKDI | non-NR | non-NR |
| E4YIR1_OIKDI | non-NR | non-NR |
| E4YIR8_OIKDI | non-NR | non-NR |
| E4YIR9_OIKDI | non-NR | non-NR |
| E4YIT1_OIKDI | non-NR | non-NR |
| E4YIU6_OIKDI | non-NR | non-NR |
| E4YIU9_OIKDI | non-NR | non-NR |
| E4YIV1_OIKDI | non-NR | non-NR |
| E4YIV7_OIKDI | non-NR | non-NR |
| E4YIV9_OIKDI | non-NR | non-NR |
| E4YIW0_OIKDI | non-NR | non-NR |
| E4YIW2_OIKDI | non-NR | non-NR |
| E4YIW3_OIKDI | non-NR | non-NR |
| E4YIW4_OIKDI | non-NR | non-NR |
| E4YIW8_OIKDI | non-NR | non-NR |
| E4YIX0_OIKDI | non-NR | non-NR |
| E4YIX9_OIKDI | non-NR | non-NR |
| E4YIY0_OIKDI | non-NR | non-NR |
| E4YIY2_OIKDI | non-NR | non-NR |
| E4YIY3_OIKDI | non-NR | non-NR |
| E4YIZ2_OIKDI | non-NR | non-NR |
| E4YIZ6_OIKDI | non-NR | non-NR |
| E4YIZ9_OIKDI | non-NR | non-NR |
| E4YJ07_OIKDI | non-NR | non-NR |
| E4YJ09_OIKDI | non-NR | non-NR |
| E4YJ10_OIKDI | non-NR | non-NR |
| E4YJ14_OIKDI | non-NR | non-NR |
| E4YJ15_OIKDI | non-NR | non-NR |
| E4YJ17_OIKDI | non-NR | non-NR |
| E4YJ21_OIKDI | non-NR | non-NR |
| E4YJ26_OIKDI | non-NR | non-NR |
| E4YJ27_OIKDI | non-NR | non-NR |
| E4YJ28_OIKDI | non-NR | non-NR |
| E4YJ30_OIKDI | non-NR | non-NR |
| E4YJ32_OIKDI | non-NR | non-NR |
| E4YJ34_OIKDI | non-NR | non-NR |
| E4YJ37_OIKDI | non-NR | non-NR |
| E4YJ38_OIKDI | non-NR | non-NR |

|              |        |        |
|--------------|--------|--------|
| E4YJ43_OIKDI | non-NR | non-NR |
| E4YJ46_OIKDI | non-NR | non-NR |
| E4YJ50_OIKDI | non-NR | non-NR |
| E4YJ52_OIKDI | non-NR | non-NR |
| E4YJ56_OIKDI | non-NR | non-NR |
| E4YJ60_OIKDI | non-NR | non-NR |
| E4YJ61_OIKDI | non-NR | non-NR |
| E4YJ62_OIKDI | non-NR | non-NR |
| E4YJ63_OIKDI | non-NR | non-NR |
| E4YJ66_OIKDI | non-NR | non-NR |
| E4YJ67_OIKDI | non-NR | non-NR |
| E4YJ68_OIKDI | non-NR | non-NR |
| E4YJ70_OIKDI | non-NR | non-NR |
| Q9I7L3_DROME | NR     | non-NR |
| E4YJ71_OIKDI | non-NR | non-NR |
| E4YJ73_OIKDI | non-NR | non-NR |
| E4YH51_OIKDI | non-NR | non-NR |
| E4YJ75_OIKDI | non-NR | non-NR |
| E4YJ82_OIKDI | non-NR | non-NR |
| E4YJ86_OIKDI | non-NR | non-NR |
| E4YJ93_OIKDI | non-NR | non-NR |
| E4YJA0_OIKDI | non-NR | non-NR |
| E4YJA1_OIKDI | non-NR | non-NR |
| E4YJA5_OIKDI | non-NR | non-NR |
| E4YJA7_OIKDI | non-NR | non-NR |
| E4YJA8_OIKDI | non-NR | non-NR |
| E4YJB2_OIKDI | non-NR | non-NR |
| E4YJB6_OIKDI | non-NR | non-NR |
| E4YJC2_OIKDI | non-NR | non-NR |
| E4YJC3_OIKDI | non-NR | non-NR |
| E4YJC5_OIKDI | non-NR | non-NR |
| E4YJD4_OIKDI | non-NR | non-NR |
| E4YJD7_OIKDI | non-NR | non-NR |
| E4YJD8_OIKDI | non-NR | non-NR |
| E4YJE2_OIKDI | non-NR | non-NR |
| E4YJE4_OIKDI | non-NR | non-NR |
| E4YJE6_OIKDI | non-NR | non-NR |
| E4YJE8_OIKDI | non-NR | non-NR |
| E4YJF3_OIKDI | non-NR | non-NR |
| A8PAW9_BRUMA | non-NR | non-NR |
| A8PAX6_BRUMA | non-NR | non-NR |

|              |        |        |
|--------------|--------|--------|
| E4YJF5_OIKDI | non-NR | non-NR |
| E4YJF6_OIKDI | non-NR | non-NR |
| E4YJF7_OIKDI | non-NR | non-NR |
| E4YJG1_OIKDI | non-NR | non-NR |
| E4YJG2_OIKDI | non-NR | non-NR |
| E4YJG8_OIKDI | non-NR | non-NR |
| E4YJH3_OIKDI | non-NR | non-NR |
| E4YJH4_OIKDI | non-NR | non-NR |
| E4YJI6_OIKDI | non-NR | non-NR |
| E4YJI8_OIKDI | non-NR | non-NR |
| E4YJJ2_OIKDI | non-NR | non-NR |
| E4YJJ8_OIKDI | non-NR | non-NR |
| E4YJJ9_OIKDI | non-NR | non-NR |
| E4YJK2_OIKDI | non-NR | non-NR |
| E4YJK5_OIKDI | non-NR | non-NR |
| E4YJK8_OIKDI | non-NR | non-NR |
| E4YJL0_OIKDI | non-NR | non-NR |
| E4YJL1_OIKDI | non-NR | non-NR |
| E4YJM3_OIKDI | non-NR | non-NR |
| E4YJN5_OIKDI | non-NR | non-NR |
| E4YJP6_OIKDI | non-NR | non-NR |
| E4YJP7_OIKDI | non-NR | non-NR |
| E4YJP9_OIKDI | non-NR | non-NR |
| E4YJQ5_OIKDI | non-NR | non-NR |
| E4YJR1_OIKDI | non-NR | non-NR |
| E4YJR2_OIKDI | non-NR | non-NR |
| E4YJR5_OIKDI | non-NR | non-NR |
| E4YJR7_OIKDI | non-NR | non-NR |
| E4YJR8_OIKDI | non-NR | non-NR |
| E4YJT4_OIKDI | non-NR | non-NR |
| Q9I7J1_DROME | NR     | non-NR |
| Q9I7J2_DROME | NR     | non-NR |
| E4YJT6_OIKDI | non-NR | non-NR |
| E4YJT8_OIKDI | non-NR | non-NR |
| E4YJU5_OIKDI | non-NR | non-NR |
| E4YJU7_OIKDI | non-NR | non-NR |
| E4YJV5_OIKDI | non-NR | non-NR |
| E4YJV8_OIKDI | non-NR | non-NR |
| E4YJW4_OIKDI | non-NR | non-NR |
| E4YJX2_OIKDI | non-NR | non-NR |
| E4YJX6_OIKDI | non-NR | non-NR |

|              |        |        |
|--------------|--------|--------|
| E4YJY0_OIKDI | non-NR | non-NR |
| E4YJY9_OIKDI | non-NR | non-NR |
| E4YJZ1_OIKDI | non-NR | non-NR |
| E4YJZ5_OIKDI | non-NR | non-NR |
| E4YJZ7_OIKDI | non-NR | non-NR |
| E4YJZ9_OIKDI | non-NR | non-NR |
| E4YK00_OIKDI | non-NR | non-NR |
| E4YK01_OIKDI | non-NR | non-NR |
| E4YK05_OIKDI | non-NR | non-NR |
| E4YK07_OIKDI | non-NR | non-NR |
| E4YK08_OIKDI | non-NR | non-NR |
| E4YK13_OIKDI | non-NR | non-NR |
| E4YK14_OIKDI | non-NR | non-NR |
| E4YK15_OIKDI | non-NR | non-NR |
| E4YK25_OIKDI | non-NR | non-NR |
| E4YK26_OIKDI | non-NR | non-NR |
| E4YK27_OIKDI | non-NR | non-NR |
| E4YK38_OIKDI | non-NR | non-NR |
| E4YK41_OIKDI | non-NR | non-NR |
| E4YK47_OIKDI | non-NR | non-NR |
| E4YK54_OIKDI | non-NR | non-NR |
| Q9I7L5_DROME | NR     | non-NR |
| E4YK60_OIKDI | non-NR | non-NR |
| E4YK86_OIKDI | non-NR | non-NR |
| E4YK87_OIKDI | non-NR | non-NR |
| E4YK88_OIKDI | non-NR | non-NR |
| E4YK96_OIKDI | non-NR | non-NR |
| E4YK99_OIKDI | non-NR | non-NR |
| E4YKB2_OIKDI | non-NR | non-NR |
| E4YKB4_OIKDI | non-NR | non-NR |
| E4YKB9_OIKDI | non-NR | non-NR |
| E4YKC3_OIKDI | non-NR | non-NR |
| E4YKC4_OIKDI | non-NR | non-NR |
| A8PAZ4_BRUMA | non-NR | non-NR |
| E4YKC6_OIKDI | non-NR | non-NR |
| E4YKC7_OIKDI | non-NR | non-NR |
| E4YKC8_OIKDI | non-NR | non-NR |
| E4YKC9_OIKDI | non-NR | non-NR |
| E4YKD4_OIKDI | non-NR | non-NR |
| E4YKD6_OIKDI | non-NR | non-NR |
| E4YKD8_OIKDI | non-NR | non-NR |

|              |        |        |
|--------------|--------|--------|
| E4YKE0_OIKDI | non-NR | non-NR |
| E4YKE8_OIKDI | non-NR | non-NR |
| E4YGL4_OIKDI | non-NR | non-NR |
| E4YGL7_OIKDI | non-NR | non-NR |
| E4YKF2_OIKDI | non-NR | non-NR |
| E4YKF3_OIKDI | non-NR | non-NR |
| E4YKF5_OIKDI | non-NR | non-NR |
| E4YKG1_OIKDI | non-NR | non-NR |
| E4YKG3_OIKDI | non-NR | non-NR |
| E4YKG7_OIKDI | non-NR | non-NR |
| E4YKH5_OIKDI | non-NR | non-NR |
| E4YKH8_OIKDI | non-NR | non-NR |
| E4YKI0_OIKDI | non-NR | non-NR |
| E4YKI2_OIKDI | non-NR | non-NR |
| E4YKJ9_OIKDI | non-NR | non-NR |
| E4YKK1_OIKDI | non-NR | non-NR |
| E4YKK7_OIKDI | non-NR | non-NR |
| E4YKL0_OIKDI | non-NR | non-NR |
| Q9I7I6_DROME | NR     | non-NR |
| Q9I7J0_DROME | NR     | non-NR |
| E4YKL4_OIKDI | non-NR | non-NR |
| E4YKL5_OIKDI | non-NR | non-NR |
| E4YKM7_OIKDI | non-NR | non-NR |
| E4YKN2_OIKDI | non-NR | non-NR |
| E4YKP0_OIKDI | non-NR | non-NR |
| E4YKP2_OIKDI | non-NR | non-NR |
| E4YKP5_OIKDI | non-NR | non-NR |
| E4YKP8_OIKDI | non-NR | non-NR |
| E4YKQ0_OIKDI | non-NR | non-NR |
| E4YKQ4_OIKDI | non-NR | non-NR |
| E4YKQ5_OIKDI | non-NR | non-NR |
| E4YKR1_OIKDI | non-NR | non-NR |
| E4YKR2_OIKDI | non-NR | non-NR |
| E4YKR7_OIKDI | non-NR | non-NR |
| E4YKS8_OIKDI | non-NR | non-NR |
| E4YKT1_OIKDI | non-NR | non-NR |
| E4YKT4_OIKDI | non-NR | non-NR |
| E4YKU0_OIKDI | non-NR | non-NR |
| E4YKU4_OIKDI | non-NR | non-NR |
| E4YKU5_OIKDI | non-NR | non-NR |
| E4YKU8_OIKDI | non-NR | non-NR |



|              |        |        |
|--------------|--------|--------|
| E4YKU9_OIKDI | non-NR | non-NR |
| Q9I7I4_DROME | NR     | non-NR |
| E4YKV2_OIKDI | non-NR | non-NR |
| E4YKX2_OIKDI | non-NR | non-NR |
| E4YKX7_OIKDI | non-NR | non-NR |
| E4YKX8_OIKDI | non-NR | non-NR |
| E4YKY6_OIKDI | non-NR | non-NR |
| E4YKY8_OIKDI | non-NR | non-NR |
| TANC2_HUMAN  | non-NR | non-NR |
| K1632_HUMAN  | non-NR | non-NR |
| MOV10_HUMAN  | non-NR | non-NR |
| ZN532_HUMAN  | non-NR | non-NR |
| MTL14_HUMAN  | non-NR | non-NR |
| ARGAL_HUMAN  | non-NR | non-NR |
| SMUF1_HUMAN  | non-NR | non-NR |
| AN08_HUMAN   | non-NR | non-NR |
| TRPM3_HUMAN  | non-NR | non-NR |
| GBA2_HUMAN   | non-NR | non-NR |
| CWC22_HUMAN  | non-NR | non-NR |
| NCK5L_HUMAN  | non-NR | non-NR |
| CPNE5_HUMAN  | non-NR | non-NR |
| SYTL2_HUMAN  | non-NR | non-NR |
| MAGE1_HUMAN  | non-NR | non-NR |
| K1586_HUMAN  | non-NR | non-NR |
| TNR6C_HUMAN  | non-NR | non-NR |
| ANKH_HUMAN   | non-NR | non-NR |
| ZSWM6_HUMAN  | non-NR | non-NR |
| VAT1L_HUMAN  | non-NR | non-NR |
| ZDBF2_HUMAN  | non-NR | non-NR |
| Q9I7I3_DROME | NR     | non-NR |
| ROB02_HUMAN  | non-NR | non-NR |
| AGO4_HUMAN   | non-NR | non-NR |
| CHD8_HUMAN   | non-NR | non-NR |
| PCD18_HUMAN  | non-NR | non-NR |
| GPAT1_HUMAN  | non-NR | non-NR |
| CL035_HUMAN  | non-NR | non-NR |
| PLXA4_HUMAN  | non-NR | non-NR |
| K1549_HUMAN  | non-NR | non-NR |
| E41L5_HUMAN  | non-NR | non-NR |
| FBSL_HUMAN   | non-NR | non-NR |
| TRI39_HUMAN  | non-NR | non-NR |

|              |        |        |
|--------------|--------|--------|
| TPIP1_HUMAN  | non-NR | non-NR |
| Q9HCN2-3     | non-NR | non-NR |
| TMM8A_HUMAN  | non-NR | non-NR |
| GPN1_HUMAN   | non-NR | non-NR |
| Q9HCN5_HUMAN | non-NR | non-NR |
| SDF2L_HUMAN  | non-NR | non-NR |
| HHATL_HUMAN  | non-NR | non-NR |
| GALT9_HUMAN  | non-NR | non-NR |
| PDE11_HUMAN  | non-NR | non-NR |
| E41LA_HUMAN  | non-NR | non-NR |
| SYF1_HUMAN   | non-NR | non-NR |
| FGF22_HUMAN  | non-NR | non-NR |
| CELR2_HUMAN  | non-NR | non-NR |
| DPOD4_HUMAN  | non-NR | non-NR |
| BRMS1_HUMAN  | non-NR | non-NR |
| ZN304_HUMAN  | non-NR | non-NR |
| Q9HCX8_HUMAN | non-NR | non-NR |
| Q9HCY4_HUMAN | non-NR | non-NR |
| Q9I7I1_DROME | NR     | non-NR |
| S10AE_HUMAN  | non-NR | non-NR |
| ZN334_HUMAN  | non-NR | non-NR |
| AT131_HUMAN  | non-NR | non-NR |
| LYRM4_HUMAN  | non-NR | non-NR |
| E4YH25_OIKDI | non-NR | non-NR |
| SPCS_HUMAN   | non-NR | non-NR |
| CHM1A_HUMAN  | non-NR | non-NR |
| PTPRH_HUMAN  | non-NR | non-NR |
| TM9S3_HUMAN  | non-NR | non-NR |
| MOG1_HUMAN   | non-NR | non-NR |
| E4YH36_OIKDI | non-NR | non-NR |
| E4YH48_OIKDI | non-NR | non-NR |
| Q9HD52_HUMAN | non-NR | non-NR |
| GAGD2_HUMAN  | non-NR | non-NR |
| MYO10_HUMAN  | non-NR | non-NR |
| Q9HD86_HUMAN | non-NR | non-NR |
| CF050_HUMAN  | non-NR | non-NR |
| RETN_HUMAN   | non-NR | non-NR |
| Q9HDB3_HUMAN | non-NR | non-NR |
| Q9HDC8_HUMAN | non-NR | non-NR |
| HRSL1_HUMAN  | non-NR | non-NR |
| RHO1_ASHGO   | non-NR | non-NR |

|              |        |        |
|--------------|--------|--------|
| CCNB3_DROME  | NR     | non-NR |
| PP2A1_EMENI  | non-NR | non-NR |
| PEX6_PENCH   | non-NR | non-NR |
| RL14_THEAC   | non-NR | non-NR |
| LGUL_PSEAE   | non-NR | non-NR |
| ETFD_PSEAE   | non-NR | non-NR |
| Y2418_PSEAE  | non-NR | non-NR |
| ACON1_PSEAE  | non-NR | non-NR |
| COBP_PSEAE   | non-NR | non-NR |
| PR2_DROME    | non-NR | non-NR |
| Q9I7H5_DROME | non-NR | non-NR |
| Q9I7H8_DROME | non-NR | non-NR |

## II. Results of the 2<sup>nd</sup> level prediction in identifying the subfamilies of NRs

| <b>Protein code</b> | <b>Predicted</b> | <b>Observed</b> |
|---------------------|------------------|-----------------|
| THA_CHICK           | NR1              | NR1             |
| THA1_SHEEP          | NR1              | NR1             |
| THB2_MOUSE          | NR1              | NR1             |
| THB1_HUMAN          | NR1              | NR1             |
| Q6F3J6_CONMY        | NR1              | NR1             |
| THB1_RAT            | NR1              | NR1             |
| THAA_XENLA          | NR1              | NR1             |
| THB1_MOUSE          | NR1              | NR1             |
| Q7T0K4_AMBME        | NR1              | NR1             |
| THAB_XENLA          | NR1              | NR1             |
| THA_RANCA           | NR1              | NR1             |
| THA_SALSA           | NR1              | NR1             |
| THB2_HUMAN          | NR1              | NR1             |
| Q6F3J5_CONMY        | NR1              | NR1             |
| THA_HIPHI           | NR1              | NR1             |
| THA_NECMA           | NR1              | NR1             |
| THA1_BRARE          | NR1              | NR1             |
| Q766D2_ORYLA        | NR1              | NR1             |
| Q5RZV6_PSEAM        | NR1              | NR1             |
| THAA_PAROL          | NR1              | NR1             |
| THBB_XENLA          | NR1              | NR1             |
| THA_HUMAN           | NR1              | NR1             |
| THA_PIG             | NR1              | NR1             |
| THA_RAT             | NR1              | NR1             |

|              |     |     |
|--------------|-----|-----|
| Q80Y90_MOUSE | NR1 | NR1 |
| THA_MOUSE    | NR1 | NR1 |
| THAB_PAROL   | NR1 | NR1 |
| Q800D8_SPAAU | NR1 | NR1 |
| THB_BRARE    | NR1 | NR1 |
| THB_PAROL    | NR1 | NR1 |
| ERBA_AVIER   | NR1 | NR1 |
| Q6F3J8_CONMY | NR1 | NR1 |
| THB_RANCA    | NR1 | NR1 |
| Q90Y21_SALSA | NR1 | NR1 |
| Q90Y22_SALSA | NR1 | NR1 |
| THBA_XENLA   | NR1 | NR1 |
| THB_CHICK    | NR1 | NR1 |
| THB_CAIMO    | NR1 | NR1 |
| Q7T0K3_AMBME | NR1 | NR1 |
| Q6Y9T0_NECMA | NR1 | NR1 |
| Q766D1_ORYLA | NR1 | NR1 |
| P97513_MUSSP | NR1 | NR1 |
| RRA_MOUSE    | NR1 | NR1 |
| Q6F3J7_CONMY | NR1 | NR1 |
| RRA_HUMAN    | NR1 | NR1 |
| RRA_CHICK    | NR1 | NR1 |
| RRG1_HUMAN   | NR1 | NR1 |
| Q91YX2_MOUSE | NR1 | NR1 |
| RRG1_MOUSE   | NR1 | NR1 |
| Q9I8T3_AMBME | NR1 | NR1 |
| RRB_HUMAN    | NR1 | NR1 |
| RRB_CHICK    | NR1 | NR1 |
| RRG2_HUMAN   | NR1 | NR1 |
| RRB_COTJA    | NR1 | NR1 |
| RRA_NOTVI    | NR1 | NR1 |
| Q8VHB6_MESAU | NR1 | NR1 |
| Q5U645_HUMAN | NR1 | NR1 |
| RRG2_MOUSE   | NR1 | NR1 |
| Q9I8T2_AMBME | NR1 | NR1 |
| Q9QWJ1_RAT   | NR1 | NR1 |
| Q8VHB8_MESAU | NR1 | NR1 |
| Q8VHB7_MESAU | NR1 | NR1 |
| RRG_XENLA    | NR1 | NR1 |
| PPAT_PIG     | NR1 | NR1 |
| Q8HZ56_SHEEP | NR1 | NR1 |

|              |     |     |
|--------------|-----|-----|
| PPAT_BOVIN   | NR1 | NR1 |
| PPAT_MACMU   | NR1 | NR1 |
| RRA_FUGRU    | NR1 | NR1 |
| Q95J17_MACFA | NR1 | NR1 |
| Q8MHZ0_MACFA | NR1 | NR1 |
| Q95KZ8_MACFA | NR1 | NR1 |
| PPAT_HUMAN   | NR1 | NR1 |
| RRB_MOUSE    | NR1 | NR1 |
| Q866S0_CAPHI | NR1 | NR1 |
| Q5RFE5_PONPY | NR1 | NR1 |
| PPAT_RABIT   | NR1 | NR1 |
| Q92019_XENLA | NR1 | NR1 |
| Q8JHU6_ANAPL | NR1 | NR1 |
| Q8HXA4_RABIT | NR1 | NR1 |
| PPAT_RAT     | NR1 | NR1 |
| PPAT_CRIGR   | NR1 | NR1 |
| PPAT_MOUSE   | NR1 | NR1 |
| Q7ZTI3_BRARE | NR1 | NR1 |
| Q90272_BRARE | NR1 | NR1 |
| Q91391_BRARE | NR1 | NR1 |
| Q90271_BRARE | NR1 | NR1 |
| RRG_BRARE    | NR1 | NR1 |
| Q9I878_CHICK | NR1 | NR1 |
| RRA_XENLA    | NR1 | NR1 |
| Q98SF8_XENLA | NR1 | NR1 |
| Q6PA31_XENLA | NR1 | NR1 |
| NR1D2_MOUSE  | NR1 | NR1 |
| Q8C598_MOUSE | NR1 | NR1 |
| Q7TNH1_MESAU | NR1 | NR1 |
| PPAS_MOUSE   | NR1 | NR1 |
| PPAS_HUMAN   | NR1 | NR1 |
| Q99ND3_RAT   | NR1 | NR1 |
| PPAR_RAT     | NR1 | NR1 |
| PPAR_CANFA   | NR1 | NR1 |
| NR1D2_RAT    | NR1 | NR1 |
| Q6I9S1_HUMAN | NR1 | NR1 |
| PPAR_HUMAN   | NR1 | NR1 |
| PPAR_MOUSE   | NR1 | NR1 |
| Q62879_RAT   | NR1 | NR1 |
| Q9I8W4_CHICK | NR1 | NR1 |
| NR1H2_HUMAN  | NR1 | NR1 |

|              |     |     |
|--------------|-----|-----|
| PPAT_XENLA   | NR1 | NR1 |
| Q8QGC1_9AVES | NR1 | NR1 |
| Q9QWI0_RAT   | NR1 | NR1 |
| Q866Q2_PIG   | NR1 | NR1 |
| Q9I8W3_CHICK | NR1 | NR1 |
| Q6P6S7_RAT   | NR1 | NR1 |
| Q9N2H4_RABIT | NR1 | NR1 |
| PPAR_PHACI   | NR1 | NR1 |
| Q8BP65_MOUSE | NR1 | NR1 |
| Q90970_CHICK | NR1 | NR1 |
| NR1H3_RAT    | NR1 | NR1 |
| PPAR_CAVPO   | NR1 | NR1 |
| NR1H3_MOUSE  | NR1 | NR1 |
| Q91X41_MOUSE | NR1 | NR1 |
| Q9U3Y4_AEDAL | NR1 | NR1 |
| ECR_LUCCU    | NR1 | NR1 |
| NR1H2_RAT    | NR1 | NR1 |
| PPAR_XENLA   | NR1 | NR1 |
| Q6AXA9_XENLA | NR1 | NR1 |
| Q8IW13_HUMAN | NR1 | NR1 |
| Q5U0N9_HUMAN | NR1 | NR1 |
| NR1D1_HUMAN  | NR1 | NR1 |
| NR1H2_MOUSE  | NR1 | NR1 |
| ECR_AEDAE    | NR1 | NR1 |
| Q8MYA6_9NEOP | NR1 | NR1 |
| Q7T029_PLEPL | NR1 | NR1 |
| Q9W712_PLAFE | NR1 | NR1 |
| Q9VVM9_DROME | NR1 | NR1 |
| Q8MYA7_9NEOP | NR1 | NR1 |
| O76827_CERCA | NR1 | NR1 |
| Q8IQS3_DROME | NR4 | NR1 |
| E75A_DROME   | NR1 | NR1 |
| Q9I8F6_SALSA | NR1 | NR1 |
| ECR_MANSE    | NR1 | NR1 |
| RORA_MOUSE   | NR1 | NR1 |
| Q6GMA2_XENLA | NR1 | NR1 |
| O77255_CHOFU | NR1 | NR1 |
| Q6RVD3_PLOIN | NR1 | NR1 |
| Q8JHU1_CHICK | NR1 | NR1 |
| Q5RGZ2_BRARE | NR1 | NR1 |
| O77240_CHOFU | NR1 | NR1 |

|              |     |     |
|--------------|-----|-----|
| Q8JIT8_SALSA | NR1 | NR1 |
| Q8AXU8_CHICK | NR1 | NR1 |
| O44337_9ACAR | NR1 | NR1 |
| Q68CY8_HUMAN | NR1 | NR1 |
| Q5XI75_RAT   | NR1 | NR1 |
| NR1H4_RAT    | NR1 | NR1 |
| ECR_HELVI    | NR1 | NR1 |
| O44336_9ACAR | NR1 | NR1 |
| O02035_TENMO | NR1 | NR1 |
| Q8K476_MESAU | NR1 | NR1 |
| Q8K473_MESAU | NR1 | NR1 |
| Q8K474_MESAU | NR1 | NR1 |
| Q8K475_MESAU | NR1 | NR1 |
| HR3_GALME    | NR1 | NR1 |
| ECR_CHITE    | NR1 | NR1 |
| Q9BMC6_HELAM | NR1 | NR1 |
| E75_GALME    | NR1 | NR1 |
| Q7Z2W0_HUMAN | NR1 | NR1 |
| NR1H4_HUMAN  | NR1 | NR1 |
| Q8SPF5_RABIT | NR1 | NR1 |
| VDR_CHICK    | NR1 | NR1 |
| Q8WSA2_BOMMO | NR1 | NR1 |
| Q9U5G4_BOMMO | NR1 | NR1 |
| E75_CHOFU    | NR1 | NR1 |
| E75_MANSE    | NR1 | NR1 |
| Q8JHU2_CHICK | NR1 | NR1 |
| Q8JJ28_XENLA | NR1 | NR1 |
| Q6P7H5_XENLA | NR1 | NR1 |
| VDR_COTJA    | NR1 | NR1 |
| Q27547_CHOFU | NR1 | NR1 |
| NR1D1_RAT    | NR1 | NR1 |
| HR3_DROME    | NR1 | NR1 |
| Q6DGW7_BRARE | NR1 | NR1 |
| Q95P94_BOMMO | NR1 | NR1 |
| PXR_HUMAN    | NR1 | NR1 |
| Q811X2_MOUSE | NR1 | NR1 |
| VDR_SAGOE    | NR1 | NR1 |
| E75B_DROME   | NR1 | NR1 |
| Q8IQS2_DROME | NR1 | NR1 |
| VDR_HUMAN    | NR1 | NR1 |
| Q9I8F7_SALSA | NR1 | NR1 |

|              |     |     |
|--------------|-----|-----|
| Q8SQ01_MACMU | NR1 | NR1 |
| Q9IB74_PAROL | NR1 | NR1 |
| VDR_RAT      | NR1 | NR1 |
| VDR_BOVIN    | NR1 | NR1 |
| Q922X0_MOUSE | NR1 | NR1 |
| VDR_MOUSE    | NR1 | NR1 |
| PXR_RAT      | NR1 | NR1 |
| Q5RAP4_PONPY | NR1 | NR1 |
| PPAS_XENLA   | NR1 | NR1 |
| Q9IB73_PAROL | NR1 | NR1 |
| Q62702_RAT   | NR1 | NR1 |
| PXR_MOUSE    | NR1 | NR1 |
| RORG_MOUSE   | NR1 | NR1 |
| Q9NH86_AEDAE | NR1 | NR1 |
| VDR_XENLA    | NR1 | NR1 |
| Q98934_CHICK | NR1 | NR1 |
| RORB_MOUSE   | NR1 | NR1 |
| RORB_RAT     | NR1 | NR1 |
| RORB_HUMAN   | NR1 | NR1 |
| Q7ZU39_BRARE | NR1 | NR1 |
| Q91839_XENLA | NR1 | NR1 |
| Q8AVZ2_XENLA | NR1 | NR1 |
| Q9TU02_RABIT | NR1 | NR1 |
| Q9U5G3_BOMMO | NR1 | NR1 |
| NHR23_CAEEL  | NR1 | NR1 |
| Q6Q2C9_PLOIN | NR1 | NR1 |
| Q8SXA4_DROME | NR1 | NR1 |
| Q5REL4_PONPY | NR1 | NR1 |
| Q5R8V3_PONPY | NR1 | NR1 |
| NR1I3_MOUSE  | NR1 | NR1 |
| Q811W9_MOUSE | NR1 | NR1 |
| NR1I3_HUMAN  | NR1 | NR1 |
| NR1I3_MACMU  | NR1 | NR1 |
| CNR14_CAEEL  | NR1 | NR1 |
| Q9U3F1_CAEEL | NR1 | NR1 |
| NR1I3_PHOSI  | NR1 | NR1 |
| NR1I3_CALUR  | NR1 | NR1 |
| Q811X1_MOUSE | NR1 | NR1 |
| Q811X0_MOUSE | NR1 | NR1 |
| Q6GZ84_HUMAN | NR1 | NR1 |
| Q6GZ68_HUMAN | NR1 | NR1 |



|              |     |     |
|--------------|-----|-----|
| Q8IQS1_DROME | NR5 | NR1 |
| Q76FN2_RAT   | NR1 | NR1 |
| RXRA_RAT     | NR2 | NR2 |
| RXRA_MOUSE   | NR2 | NR2 |
| RXRA_HUMAN   | NR2 | NR2 |
| Q5TJF7_CANFA | NR2 | NR2 |
| RXRB_MOUSE   | NR2 | NR2 |
| Q6LC96_MOUSE | NR2 | NR2 |
| Q6MGB3_RAT   | NR2 | NR2 |
| RXRG_MOUSE   | NR2 | NR2 |
| RXRG_HUMAN   | NR2 | NR2 |
| Q5REL6_PONPY | NR2 | NR2 |
| RXRA_XENLA   | NR2 | NR2 |
| 7UP1_DROME   | NR2 | NR2 |
| RXRG_CHICK   | NR2 | NR2 |
| RXRB_BRARE   | NR2 | NR2 |
| Q6INZ0_XENLA | NR2 | NR2 |
| Q91613_XENLA | NR2 | NR2 |
| RXRA_BRARE   | NR2 | NR2 |
| Q86GV5_BRAFL | NR2 | NR2 |
| COT1_MOUSE   | NR2 | NR2 |
| COT1_HUMAN   | NR2 | NR2 |
| COT1_BOVIN   | NR2 | NR2 |
| Q62681_RAT   | NR2 | NR2 |
| Q6DHP9_BRARE | NR2 | NR2 |
| COT2_BOVIN   | NR2 | NR2 |
| COT2_HUMAN   | NR2 | NR2 |
| COT2_MOUSE   | NR2 | NR2 |
| COT2_RAT     | NR2 | NR2 |
| NR2F1_BRARE  | NR2 | NR2 |
| Q91430_BRARE | NR2 | NR2 |
| Q6PHF2_BRARE | NR2 | NR2 |
| Q9W745_XENLA | NR2 | NR2 |
| Q91840_XENLA | NR2 | NR2 |
| Q8T5C6_BIOGL | NR2 | NR2 |
| COT2_CHICK   | NR2 | NR2 |
| Q6DCH6_XENLA | NR2 | NR2 |
| Q8VCR0_MOUSE | NR2 | NR2 |
| Q7ZXI7_XENLA | NR2 | NR2 |
| Q9PS79_9PIPI | NR2 | NR2 |
| Q8UUM6_ORYLA | NR2 | NR2 |

|              |     |     |
|--------------|-----|-----|
| RXRD_BRARE   | NR2 | NR2 |
| Q66TQ0_9CAEN | NR2 | NR2 |
| Q6V7U7_LOCMI | NR2 | NR2 |
| Q66J63_XENLA | NR2 | NR2 |
| Q91720_XENLA | NR2 | NR2 |
| Q5RCZ5_PONPY | NR2 | NR2 |
| Q95K90_MACFA | NR2 | NR2 |
| RXRG_BRARE   | NR2 | NR2 |
| Q15625_HUMAN | NR2 | NR2 |
| Q9VLI7_DROME | NR2 | NR2 |
| NR2F5_BRARE  | NR2 | NR2 |
| Q9GSG8_AEDAE | NR2 | NR2 |
| USP_MANSE    | NR2 | NR2 |
| Q6PH18_BRARE | NR2 | NR2 |
| TR4_HUMAN    | NR2 | NR2 |
| TR4_MOUSE    | NR2 | NR2 |
| Q6P0E6_BRARE | NR2 | NR2 |
| TR4_RAT      | NR2 | NR2 |
| Q9GSG7_AEDAE | NR2 | NR2 |
| Q9U7D9_LOCMI | NR2 | NR2 |
| USP_BOMMO    | NR2 | NR2 |
| Q8VIJ3_MOUSE | NR2 | NR2 |
| Q8VIJ4_RAT   | NR2 | NR2 |
| HNF4_DROME   | NR2 | NR2 |
| Q62152_MOUSE | NR2 | NR2 |
| Q6GL59_XENTR | NR2 | NR2 |
| Q7T0T7_XENLA | NR2 | NR2 |
| Q922G8_MOUSE | NR2 | NR2 |
| Q9NFY1_TENMO | NR2 | NR2 |
| EAR2_MOUSE   | NR2 | NR2 |
| Q6P117_BRARE | NR2 | NR2 |
| EAR2_RAT     | NR2 | NR2 |
| Q5QP8_HUMAN  | NR2 | NR2 |
| Q962I5_LUCCU | NR2 | NR2 |
| Q6P115_BRARE | NR2 | NR2 |
| O61449_9ACAR | NR2 | NR2 |
| O61448_9ACAR | NR2 | NR2 |
| HNF4A_MOUSE  | NR2 | NR2 |
| HNF4A_RAT    | NR2 | NR2 |
| Q6PHH5_BRARE | NR2 | NR2 |
| Q9JJI9_TAMSI | NR2 | NR2 |

|              |     |     |
|--------------|-----|-----|
| Q7YRQ5_BOVIN | NR2 | NR2 |
| HNF4A_HUMAN  | NR2 | NR2 |
| Q5RH32_BRARE | NR2 | NR2 |
| Q7SZG3_FUGRU | NR2 | NR2 |
| Q8AVK3_XENLA | NR2 | NR2 |
| Q5QPB7_HUMAN | NR2 | NR2 |
| Q6IVK1_PLOIN | NR2 | NR2 |
| Q95WF7_ACRMI | NR2 | NR2 |
| Q6LDB2_9MURI | NR2 | NR2 |
| Q8AXB6_BRARE | NR2 | NR2 |
| Q8I1M8_9NEOP | NR2 | NR2 |
| HNF4A_XENLA  | NR2 | NR2 |
| Q8JID3_CHICK | NR2 | NR2 |
| Q6B4V6_HUMAN | NR2 | NR2 |
| Q6B4V7_HUMAN | NR2 | NR2 |
| Q6B4V5_HUMAN | NR2 | NR2 |
| HNF4B_XENLA  | NR2 | NR2 |
| O77100_AEDAE | NR2 | NR2 |
| Q7YRQ4_BOVIN | NR2 | NR2 |
| TR2_HUMAN    | NR2 | NR2 |
| Q15626_HUMAN | NR2 | NR2 |
| NR2E3_HUMAN  | NR2 | NR2 |
| Q6DEH0_BRARE | NR2 | NR2 |
| O46175_BOMMO | NR2 | NR2 |
| NR2E1_ORYLA  | NR2 | NR2 |
| Q8JHW6_FUGRU | NR2 | NR2 |
| Q9Y1J4_SCHMA | NR2 | NR2 |
| NR2E1_MOUSE  | NR2 | NR2 |
| HNF4G_MOUSE  | NR2 | NR2 |
| Q7Z2V9_HUMAN | NR2 | NR2 |
| NR2E1_CHICK  | NR2 | NR2 |
| NR2E1_HUMAN  | NR2 | NR2 |
| HNF4G_HUMAN  | NR2 | NR2 |
| Q8MX79_BRAFL | NR2 | NR2 |
| Q90WV5_CHICK | NR2 | NR2 |
| NR2E1_XENLA  | NR2 | NR2 |
| Q9VP28_DROME | NR2 | NR2 |
| HR78_DROME   | NR2 | NR2 |
| TLL_DROVI    | NR2 | NR2 |
| Q9VML1_DROME | NR2 | NR2 |
| Q5U7E0_MUSDO | NR2 | NR2 |

|              |     |     |
|--------------|-----|-----|
| Q86PK5_CAEEL | NR2 | NR2 |
| Q61WY2_CAEER | NR2 | NR2 |
| Q8IVZ9_HUMAN | NR2 | NR2 |
| Q688B5_CAEEL | NR2 | NR2 |
| O77101_AEDAE | NR2 | NR2 |
| Q86PK4_CAEEL | NR2 | NR2 |
| GCR_SAISS    | NR3 | NR3 |
| GCR_HUMAN    | NR3 | NR3 |
| GCR_SAIIBB   | NR3 | NR3 |
| GCR_AOTNA    | NR3 | NR3 |
| Q6N0A4_HUMAN | NR3 | NR3 |
| GCR_SAGOE    | NR3 | NR3 |
| Q6XLJ0_CALJA | NR3 | NR3 |
| Q5R7M7_PONPY | NR3 | NR3 |
| Q5R9P5_PONPY | NR3 | NR3 |
| ANDR_PANTR   | NR3 | NR3 |
| ANDR_PAPHA   | NR3 | NR3 |
| ANDR_MACFA   | NR3 | NR3 |
| ANDR_MACMU   | NR3 | NR3 |
| Q9UN21_HUMAN | NR3 | NR3 |
| Q5S4M0_PIG   | NR3 | NR3 |
| GCR_MOUSE    | NR3 | NR3 |
| ANDR_EULFC   | NR3 | NR3 |
| GCR_TUPGB    | NR3 | NR3 |
| ANDR_PIG     | NR3 | NR3 |
| GCR_CAVPO    | NR3 | NR3 |
| PRGR_HUMAN   | NR3 | NR3 |
| ANDR_CANFA   | NR3 | NR3 |
| ANDR_CROCR   | NR3 | NR3 |
| GCR_RABIT    | NR3 | NR3 |
| ANDR_RAT     | NR3 | NR3 |
| ANDR_MOUSE   | NR3 | NR3 |
| PRGR_RABIT   | NR3 | NR3 |
| MCR_SAISS    | NR3 | NR3 |
| Q6XLI9_CALJA | NR3 | NR3 |
| MCR_HUMAN    | NR3 | NR3 |
| MCR_RAT      | NR3 | NR3 |
| MCR_MOUSE    | NR3 | NR3 |
| PRGR_RAT     | NR3 | NR3 |
| PRGR_MOUSE   | NR3 | NR3 |
| MCR_TUPGB    | NR3 | NR3 |

|              |     |     |
|--------------|-----|-----|
| Q13771_HUMAN | NR3 | NR3 |
| Q6DDL0_XENLA | NR3 | NR3 |
| GCR_XENLA    | NR3 | NR3 |
| Q66J29_XENLA | NR3 | NR3 |
| Q8NG42_HUMAN | NR3 | NR3 |
| GCR_PAROL    | NR3 | NR3 |
| Q8JJ91_HAPBU | NR3 | NR3 |
| Q8JJ90_HAPBU | NR3 | NR3 |
| Q5WP01_ONCMY | NR3 | NR3 |
| Q9I8F5_9TELE | NR3 | NR3 |
| Q8UWB7_ORENI | NR3 | NR3 |
| O93245_ONCMY | NR3 | NR3 |
| Q8QFV7_HAPBU | NR3 | NR3 |
| O93497_PAGMA | NR3 | NR3 |
| ANDR_RANCA   | NR3 | NR3 |
| Q66VR6_MICUN | NR3 | NR3 |
| Q60I32_GAMAF | NR3 | NR3 |
| Q9PWG5_ANGJA | NR3 | NR3 |
| Q6IVJ3_DICLA | NR3 | NR3 |
| Q8NG44_HUMAN | NR3 | NR3 |
| Q801Z1_GASAC | NR3 | NR3 |
| Q8NG45_HUMAN | NR3 | NR3 |
| Q8NG43_HUMAN | NR3 | NR3 |
| ESR1_PIG     | NR3 | NR3 |
| Q9DDZ4_MICSA | NR3 | NR3 |
| ESR1_BOVIN   | NR3 | NR3 |
| ESR1_HUMAN   | NR3 | NR3 |
| ESR1_MOUSE   | NR3 | NR3 |
| Q7SZI0_FUNHE | NR3 | NR3 |
| ESR1_HORSE   | NR3 | NR3 |
| ESR2_ONCMY   | NR3 | NR3 |
| ESR1_MESAU   | NR3 | NR3 |
| ESR1_ORYLA   | NR3 | NR3 |
| Q765N7_ALLMI | NR3 | NR3 |
| Q8AYH0_COTJA | NR3 | NR3 |
| ESR1_CHICK   | NR3 | NR3 |
| Q8UWB0_CAICR | NR3 | NR3 |
| Q6W5G7_XENLA | NR3 | NR3 |
| ESR1_POEGU   | NR3 | NR3 |
| Q90WS8_BRARE | NR3 | NR3 |
| ESR1_XENLA   | NR3 | NR3 |

|              |     |     |
|--------------|-----|-----|
| ESRB1_CARAU  | NR3 | NR3 |
| Q7ZU32_BRARE | NR3 | NR3 |
| Q8AV62_BRARE | NR3 | NR3 |
| Q60GT9_GAMAF | NR3 | NR3 |
| Q8UWA9_CNEUN | NR3 | NR3 |
| ESR2_STUVU   | NR3 | NR3 |
| ESR2_MOUSE   | NR3 | NR3 |
| ESR2_RAT     | NR3 | NR3 |
| Q8JJB9_CYPKA | NR3 | NR3 |
| ESR2_HUMAN   | NR3 | NR3 |
| ESR1_ONCMY   | NR3 | NR3 |
| Q8UWB8_ORENI | NR3 | NR3 |
| Q98SM7_BRARE | NR3 | NR3 |
| ESR2_BOVIN   | NR3 | NR3 |
| Q5PR29_BRARE | NR3 | NR3 |
| Q6XSH2_MICSA | NR3 | NR3 |
| ESR2_PIG     | NR3 | NR3 |
| ESR2_SHEEP   | NR3 | NR3 |
| Q8QHK9_PAROL | NR3 | NR3 |
| Q98SM8_BRARE | NR3 | NR3 |
| ESR2_ANGJA   | NR3 | NR3 |
| Q90WS9_BRARE | NR3 | NR3 |
| ESR2_CALJA   | NR3 | NR3 |
| ESR1_PAGMA   | NR3 | NR3 |
| Q6H9M5_SPAAU | NR3 | NR3 |
| Q804Q6_ACASC | NR3 | NR3 |
| Q6H9M4_SPAAU | NR3 | NR3 |
| Q7T3U5_9TELE | NR3 | NR3 |
| ESRB2_CARAU  | NR3 | NR3 |
| ESR1_SPAAU   | NR3 | NR3 |
| Q8UW75_ORYLA | NR3 | NR3 |
| ESR3_MICUN   | NR3 | NR3 |
| Q7T2K7_9LABR | NR3 | NR3 |
| Q6XSH1_MICSA | NR3 | NR3 |
| Q9DEV4_XENLA | NR3 | NR3 |
| ESR2_ORENI   | NR3 | NR3 |
| ESR2_SPAAU   | NR3 | NR3 |
| Q7T2K8_9LABR | NR3 | NR3 |
| Q6TGB3_HAPBU | NR3 | NR3 |
| Q800Q2_ZOAVI | NR3 | NR3 |
| ESR1_ORENI   | NR3 | NR3 |

|              |     |     |
|--------------|-----|-----|
| Q804Q7_ACASC | NR3 | NR3 |
| Q8QHL0_PAROL | NR3 | NR3 |
| ESR1 ICTPU   | NR3 | NR3 |
| Q6W5G9_XENTR | NR3 | NR3 |
| ESR1_OREAU   | NR3 | NR3 |
| Q69F36_CARAU | NR3 | NR3 |
| Q95MF0_MACAR | NR3 | NR3 |
| ESR1_BRARE   | NR3 | NR3 |
| Q5XXP1_9TELE | NR3 | NR3 |
| ESR2 ICTPU   | NR3 | NR3 |
| Q90WV1_CARAU | NR3 | NR3 |
| Q95ME9_CALJA | NR3 | NR3 |
| Q91Z86_MOUSE | NR3 | NR3 |
| ESR2_CHICK   | NR3 | NR3 |
| ESR2_COTJA   | NR3 | NR3 |
| ERR3_HUMAN   | NR3 | NR3 |
| ERR3_MOUSE   | NR3 | NR3 |
| ERR1_MOUSE   | NR3 | NR3 |
| Q5UKY7_CHICK | NR3 | NR3 |
| ERR3_PONPY   | NR3 | NR3 |
| Q6W5G5_XENLA | NR3 | NR3 |
| Q6W5G6_XENLA | NR3 | NR3 |
| ERR2_RAT     | NR3 | NR3 |
| Q6Q6F4_BRARE | NR3 | NR3 |
| Q8C7A6_MOUSE | NR3 | NR3 |
| ERR2_MOUSE   | NR3 | NR3 |
| Q8CCV5_MOUSE | NR3 | NR3 |
| Q6Q6F6_BRARE | NR3 | NR3 |
| Q6QMY5_CANFA | NR3 | NR3 |
| Q9VSE9_DROME | NR3 | NR3 |
| Q6AX97_XENLA | NR3 | NR3 |
| NR4A1_HUMAN  | NR4 | NR4 |
| Q6IBU8_HUMAN | NR4 | NR4 |
| Q8N3V2_HUMAN | NR4 | NR4 |
| Q5RBB0_PONPY | NR4 | NR4 |
| NR4A1_CANFA  | NR4 | NR4 |
| NR4A1_MOUSE  | NR4 | NR4 |
| NR4A2_MOUSE  | NR4 | NR4 |
| NR4A2_HUMAN  | NR4 | NR4 |
| NR4A2_RAT    | NR4 | NR4 |
| Q5R5Y4_PONPY | NR4 | NR4 |

|              |     |     |
|--------------|-----|-----|
| NR4A1_RAT    | NR4 | NR4 |
| NR4A3_MOUSE  | NR4 | NR4 |
| NR4A3_RAT    | NR4 | NR4 |
| Q6NXU0_HUMAN | NR4 | NR4 |
| NR4A3_HUMAN  | NR4 | NR4 |
| NR4A2_XENLA  | NR4 | NR4 |
| Q7T0V3_XENLA | NR4 | NR4 |
| Q6DH08_BRARE | NR4 | NR4 |
| Q6GMG3_BRARE | NR4 | NR4 |
| Q8INU7_DROME | NR4 | NR4 |
| Q9R1W4_MOUSE | NR4 | NR4 |
| O97727_PIG   | NR4 | NR4 |
| Q61JK3_CAEBR | NR4 | NR4 |
| NR5A2_HUMAN  | NR5 | NR5 |
| Q9UEC0_HUMAN | NR5 | NR5 |
| Q9QWM0_RAT   | NR5 | NR5 |
| NR5A2_MOUSE  | NR5 | NR5 |
| NR5A2_CHICK  | NR5 | NR5 |
| Q5XGE7_XENTR | NR5 | NR5 |
| Q9IB82_RANRU | NR5 | NR5 |
| Q91544_XENLA | NR5 | NR5 |
| Q90YL6_BRARE | NR5 | NR5 |
| Q9GKL1_HORSE | NR5 | NR5 |
| O42186_BRARE | NR5 | NR5 |
| Q9IB81_RANRU | NR5 | NR5 |
| Q9PWI7_CHICK | NR5 | NR5 |
| STF1_RAT     | NR5 | NR5 |
| Q812G5_MOUSE | NR5 | NR5 |
| O42102_CHICK | NR5 | NR5 |
| Q90XC4_POEGU | NR5 | NR5 |
| STF1_BOVIN   | NR5 | NR5 |
| STF1_MOUSE   | NR5 | NR5 |
| Q9YI54_TRASC | NR5 | NR5 |
| STF1_PIG     | NR5 | NR5 |
| STF1_HUMAN   | NR5 | NR5 |
| STF1_MACEU   | NR5 | NR5 |
| STF1_HORSE   | NR5 | NR5 |
| Q9YI95_RANRU | NR5 | NR5 |
| Q6QHU4_PLEWA | NR5 | NR5 |
| O93258_ORYLA | NR5 | NR5 |
| Q7ZT68_ORENI | NR5 | NR5 |



|              |     |     |
|--------------|-----|-----|
| Q800U8_BRARE | NR5 | NR5 |
| Q8UV27_CLAGA | NR5 | NR5 |
| Q9IAI9_BRARE | NR5 | NR5 |
| FTZF1_BOMMO  | NR5 | NR5 |
| Q91601_XENLA | NR5 | NR5 |
| DAX1_PIG     | NR0 | NR0 |
| DAX1_RAT     | NR0 | NR0 |
| DAX1_HUMAN   | NR0 | NR0 |
| Q9PTE9_CHICK | NR0 | NR0 |
| SHP_MOUSE    | NR0 | NR0 |
| SHP_HUMAN    | NR0 | NR0 |
